# Supplementary material for: Cardiorenal heart failure with preserved ejection fraction is caused by a reversible rise of mineralocorticoid-induced fibroblast subtypes
Source: Research Square preprint supplement (doi:10.21203/rs.3.rs-7039115/v1), 2025-07-14
Supplement: Supplementary file 1 [file 17a2ac5a72f7ede143d5485f.xlsx]

## Sheet: CM_ALDO_up
Term	Overlap	P-value	Adjusted P-value	Old P-value	Old Adjusted P-value	Odds Ratio	Combined Score	Genes
Cellular Respiration (GO:0045333)	15/83	6.06739e-07	0.00176076	0	0	5.56741	79.6984	NDUFB7;COX4I1;NDUFA3;ETFB;MTFR1L;COX6A1;UQCRH;COX6B1;NR4A3;NDUFS5;UQCRC1;UQCRFS1;MTFR2;CYC1;NDUFV3
Aerobic Electron Transport Chain (GO:0019646)	12/64	5.41448e-06	0.0061997	0	0	5.80413	70.3834	NDUFB7;COX4I1;NDUFS5;NDUFA3;UQCRC1;UQCRFS1;CYC1;NDUFV3;COX6A1;COX6A2;UQCRH;COX6B1
Mitochondrial ATP Synthesis Coupled Electron Transport (GO:0042775)	12/65	6.40906e-06	0.0061997	0	0	5.69429	68.0912	NDUFB7;COX4I1;NDUFS5;NDUFA3;UQCRC1;UQCRFS1;CYC1;NDUFV3;COX6A1;COX6A2;UQCRH;COX6B1
protein-RNA Complex Assembly (GO:0022618)	18/142	9.8006e-06	0.00711034	0	0	3.66796	42.3028	PRMT5;RAMAC;HSP90AA1;PTGES3;SRSF1;TARBP2;TRAF7;RPS27;EIF3L;RRS1;RSRP1;EIF3G;RPL38;SNRPF;SRSF5;SRSF6;SF3B1;SRSF9
Response To Unfolded Protein (GO:0006986)	9/43	3.24571e-05	0.0188381	0	0	6.63545	68.5813	DNAJA1;HSP90AA1;HSPA1L;DDIT3;HSPB7;HSPE1;TOR1B;HERPUD1;HSPD1
Entrainment Of Circadian Clock By Photoperiod (GO:0043153)	6/21	0.000109493	0.0528322	0	0	9.99418	91.1434	PER2;PER1;PER3;USP2;CRY2;CRY1
Positive Regulation Of Apoptotic Process (GO:0043065)	22/236	0.000135566	0.0528322	0	0	2.59936	23.15	PRNP;JUN;DDX3X;GADD45B;DIABLO;HMGB1;FOXO3;CLU;HSPD1;SOD1;DNAJA1;FLCN;TRAF7;SCIN;ADAMTSL4;DDIT3;ANKRD1;CTNNB1;CTSD;SQSTM1;PPID;TGM2
Photoperiodism (GO:0009648)	6/22	0.000145644	0.0528322	0	0	9.369	82.769	PER2;PER1;PER3;USP2;CRY2;CRY1
Regulation Of Type B Pancreatic Cell Proliferation (GO:0061469)	3/4	0.000225466	0.0654302	0	0	74.6913	627.208	NR4A1;NR4A3;PTPRN
Negative Regulation Of Glucocorticoid Receptor Signaling Pathway (GO:2000323)	3/4	0.000225466	0.0654302	0	0	74.6913	627.208	PER1;CRY2;CRY1
Aerobic Respiration (GO:0009060)	9/56	0.00027822	0.0733995	0	0	4.79647	39.2692	NDUFB7;NDUFS5;NDUFA3;UQCRC1;CHCHD10;MTFR1L;MTFR2;NDUFV3;UQCRH
Regulation Of Protein K63-linked Ubiquitination (GO:1900044)	4/10	0.000390257	0.0842033	0	0	16.6173	130.424	PARP10;DDX3X;GPS2;UBE2V1
Regulation Of Mitochondrion Organization (GO:0010821)	8/47	0.000403999	0.0842033	0	0	5.133	40.1097	FLCN;PLSCR3;STAT2;FKBP8;MIEF2;SIRT7;SQSTM1;SREBF2
Cytoplasmic Translation (GO:0002181)	11/86	0.000477518	0.0842033	0	0	3.67849	28.1291	EIF4A2;EIF4A1;RPS9;RPS27;RPL21;RPL36;RPLP2;RPL38;RPS2;RPL10A;UBA52
Peptidyl-Tyrosine Dephosphorylation (GO:0035335)	6/27	0.000489722	0.0842033	0	0	7.1362	54.3898	DUSP5;DUSP1;PTPN11;DUSP18;TNS2;DUSP7
Regulation Of Glucocorticoid Receptor Signaling Pathway (GO:2000322)	3/5	0.000547376	0.0842033	0	0	37.3435	280.463	PER1;CRY2;CRY1
Negative Regulation Of Erythrocyte Differentiation (GO:0045647)	3/5	0.000547376	0.0842033	0	0	37.3435	280.463	HSPA9;ZFP36;LDB1
Negative Regulation Of Protein Polyubiquitination (GO:1902915)	3/5	0.000547376	0.0842033	0	0	37.3435	280.463	PARP10;GPS2;PPIA
Proteasomal Protein Catabolic Process (GO:0010498)	19/211	0.000583239	0.0842033	0	0	2.49422	18.5742	KLHDC3;SIAH2;ZFAND2B;RAD23A;PSMA7;TNFSF13B;BAG6;PSMD7;PSMA4;PSMC3;PSMC4;PSMD2;DDIT3;PSMC1;PSMD3;PSMC2;CTNNB1;UBXN6;NFE2L2
Positive Regulation Of Programmed Cell Death (GO:0043068)	19/212	0.000618043	0.0842033	0	0	2.48115	18.3331	JUN;DDX3X;GADD45B;DIABLO;HMGB1;FOXO3;CLU;HSPD1;SOD1;DNAJA1;FLCN;SCIN;ADAMTSL4;ANKRD1;CTNNB1;CTSD;SQSTM1;PPID;TGM2
Negative Regulation Of Protein Modification By Small Protein Conjugation Or Removal (GO:1903321)	8/50	0.00062278	0.0842033	0	0	4.76552	35.1758	DNAJA1;PER2;U2AF2;CRY1;CTNNB1;SIRT7;SQSTM1;SMAD7
Negative Regulation Of Myeloid Cell Differentiation (GO:0045638)	5/19	0.000638343	0.0842033	0	0	8.91092	65.5544	HSPA9;ZFP36;CDK6;LDB1;ZBTB16
Protein Stabilization (GO:0050821)	17/183	0.000785818	0.0956703	0	0	2.57751	18.4261	HSP90AA1;PTGES3;CTNND1;USP2;CLU;HYPK;RTN4;SMAD7;HSPD1;CCT6A;BAG6;PER3;PEX6;FLOT1;PFN1;CRYAB;GAPDH
Proteasome-Mediated Ubiquitin-Dependent Protein Catabolic Process (GO:0043161)	24/304	0.000811704	0.0956703	0	0	2.16528	15.4089	KLHDC3;SIAH2;ZFAND2B;RAD23A;PSMA7;HERPUD1;FBXO31;TNFSF13B;BAG6;PSMD7;PSMA4;OS9;PSMC3;PSMC4;UBXN10;PSMD2;DDIT3;PSMC1;PSMD3;PSMC2;CTNNB1;ANAPC5;FBXL7;NFE2L2
Lymphocyte Proliferation (GO:0046651)	5/20	0.000824176	0.0956703	0	0	8.31638	59.0556	LMBR1L;ELF4;MSN;EMP2;HSPD1
Energy Derivation By Oxidation Of Organic Compounds (GO:0015980)	7/41	0.000909567	0.101522	0	0	5.14586	36.0341	NR4A3;COX4I1;UQCRC1;CYC1;COX6A1;UQCRH;COX6B1
Regulation Of Transcription By RNA Polymerase II (GO:0006357)	86/1591	0.000966694	0.103275	0	0	1.47564	10.2434	DDX3X;HDAC10;LDB1;TCF25;PHF1;PTPRN;RORC;HIF3A;HMGB1;ACTB;MED12;FLCN;ING2;ZFP36;CHCHD2;TBK1;DBP;NAMPT;ANKRD1;CCNL2;CIC;IER5;EIF5A;BRD2;KLF13;PEG3;ANXA4;USP2;LMO2;RFX2;EBF1;PTOV1;NME2;ARID5A;RFX1;SIRT7;SREBF2;POU5F2;KAT2A;ELF4;DDIT3;ZSCAN21;MED20;CRY2;ERF;CRY1;UBE2V1;SQSTM1;PPID;IRF9;RNASEL;CEBPB;DDX5;STXBP2;GPS2;PIK3R2;FOXO3;RELA;REPIN1;DDRGK1;SF3B1;WWOX;CBX7;JUN;JUND;BRPF3;NR1H2;STAT2;ZBTB16;RFXA…
Chaperone-Mediated Protein Complex Assembly (GO:0051131)	5/21	0.00104752	0.103275	0	0	7.79615	53.492	HSP90AA1;PTGES3;LONP1;CLU;HSPD1
Negative Regulation Of Circadian Rhythm (GO:0042754)	3/6	0.00106318	0.103275	0	0	24.8942	170.438	PER2;CRY2;CRY1
Positive Regulation Of Interferon-Beta Production (GO:0032728)	6/31	0.00106763	0.103275	0	0	5.99301	41.0061	HSP90AA1;DDX3X;TBK1;POLR3D;FLOT1;PTPN11
Positive Regulation Of Transcription By RNA Polymerase II (GO:0045944)	50/837	0.0016229	0.149015	0	0	1.61973	10.4044	DDX3X;LDB1;PTPRN;HMGB1;MED12;FLCN;CHCHD2;TBK1;DBP;NAMPT;IER5;EIF5A;PEG3;LMO2;PTOV1;NME2;SREBF2;KAT2A;ELF4;DDIT3;ZSCAN21;MED20;SQSTM1;IRF9;RNASEL;CEBPB;MEPCE;STXBP2;GPS2;PIK3R2;FOXO3;RELA;DDRGK1;SF3B1;WWOX;JUN;JUND;TAF13;NR1H2;STAT2;RFXANK;FOSL2;NFKBIA;PER1;NR4A1;KLF6;NR4A3;PSMC3;CTNNB1;NFE2L2
Negative Regulation Of mRNA Splicing, Via Spliceosome (GO:0048025)	4/14	0.00164317	0.149015	0	0	9.96807	63.9066	PCBP4;U2AF2;SRSF6;SRSF9
Positive Regulation Of Type I Interferon Production (GO:0032481)	8/58	0.00169469	0.14903	0	0	4.00117	25.5285	HSP90AA1;DDX3X;TBK1;POLR3D;FLOT1;PTPN11;GAPDH;HSPD1
Heart Process (GO:0003015)	4/15	0.00217249	0.175127	0	0	9.06135	55.5631	ACTC1;MYL2;TNNI3;SOD1
Mitochondrial Electron Transport, Cytochrome C To Oxygen (GO:0006123)	4/15	0.00217249	0.175127	0	0	9.06135	55.5631	COX4I1;COX6A1;COX6A2;COX6B1
Negative Regulation Of mRNA Processing (GO:0050686)	4/15	0.00217249	0.175127	0	0	9.06135	55.5631	PCBP4;U2AF2;SRSF6;SRSF9
Oxidative Phosphorylation (GO:0006119)	7/48	0.00235713	0.184875	0	0	4.26556	25.8079	NDUFB7;NDUFS5;NDUFA3;UQCRC1;CHCHD10;NDUFV3;UQCRH
Regulation Of Protein-Containing Complex Assembly (GO:0043254)	11/105	0.00250945	0.191642	0	0	2.93171	17.5542	NAPA;HSP90AA1;KIF9;DDX3X;SAR1A;VPS11;PTPN11;CLU;SPIDR;CRYAB;VPS16
Negative Regulation Of Apoptotic Signaling Pathway (GO:2001234)	9/76	0.0026339	0.192967	0	0	3.36076	19.9605	DDX3X;SIAH2;TMBIM1;GHITM;CLU;SLC25A4;RELA;HERPUD1;GRINA
Negative Regulation Of Protein Ubiquitination (GO:0031397)	7/49	0.00265978	0.192967	0	0	4.16375	24.689	DNAJA1;PER2;U2AF2;CRY1;SIRT7;SQSTM1;SMAD7
Cyclooxygenase Pathway (GO:0019371)	3/8	0.00280814	0.198762	0	0	14.9348	87.7453	PTGES2;PTGES3;PTGDS
Intrinsic Apoptotic Signaling Pathway (GO:0097193)	10/92	0.00296205	0.204664	0	0	3.05289	17.7735	BAG6;DDX5;HINT1;CEBPB;DDX3X;DIABLO;DDIT3;PRODH;FHIT;RRP8
Apoptotic Process (GO:0006915)	16/191	0.00319951	0.215929	0	0	2.29652	13.1929	DMPK;DIABLO;ZBTB16;EMP2;DDX41;RTN4;TGFBR2;HSPD1;BAG6;NFKBIA;TCHP;TRAF7;PLSCR3;RNF152;PPIA;GAPDH
Signal Transduction By P53 Class Mediator (GO:0072331)	5/27	0.00342929	0.226177	0	0	5.66794	32.1679	DDX5;HINT1;FHIT;NDRG1;RRP8
Regulation Of Oxidative Stress-Induced Intrinsic Apoptotic Signaling Pathway (GO:1902175)	4/17	0.00356132	0.229567	0	0	7.66641	43.2203	NME5;PPIA;SOD1;NFE2L2
Secondary Alcohol Metabolic Process (GO:1902652)	6/39	0.0036389	0.229567	0	0	4.53804	25.486	STARD3;PIP4P1;OSBPL5;IDH3G;IDH2;LCAT
Negative Regulation Of DNA-templated Transcription (GO:0045892)	47/811	0.00396083	0.237467	0	0	1.56329	8.64703	CEBPB;DDX5;HDAC10;LDB1;TCF25;SHC1;CIPC;RORC;GPS2;HMGB1;FOXO3;RRP8;RELA;CIART;FLCN;ING2;ZFP36;TRIM28;CIC;MAF1;RUNX1T1;CBX7;JUN;JUND;PEG3;NR1H2;ZBTB16;USP2;ARID5A;SIRT7;SREBF2;SMAD7;DRAP1;PER2;PER1;CENPF;PER3;NR4A3;DDIT3;CRY2;ERF;CRY1;CTNNB1;MAFK;UBE2V1;CRYAB;PPID
Positive Regulation Of Viral Genome Replication (GO:0045070)	5/28	0.00404369	0.237467	0	0	5.4212	29.874	DDX3X;RAD23A;PPIA;TARBP2;PPID
Response To Laminar Fluid Shear Stress (GO:0034616)	3/9	0.00409144	0.237467	0	0	12.4449	68.4329	SREBF2;NFE2L2;SMAD7
Mitotic G1/S Transition Checkpoint Signaling (GO:0044819)	3/9	0.00409144	0.237467	0	0	12.4449	68.4329	CDK2;SDE2;FBXO31
Cellular Response To Growth Factor Stimulus (GO:0071363)	13/146	0.00449952	0.256032	0	0	2.45036	13.2412	MAP2K3;WWOX;SHC1;PTPN11;RELA;SMAD7;TGFBR2;TMEM100;NR4A1;ZFP36;ANKRD1;CTNNB1;ZPR1
Negative Regulation Of Transcription By RNA Polymerase II (GO:0000122)	36/587	0.00462823	0.257235	0	0	1.65368	8.88949	CEBPB;DDX5;HDAC10;LDB1;TCF25;RORC;GPS2;HMGB1;FOXO3;RELA;FLCN;ING2;ZFP36;CBX7;JUN;JUND;PEG3;NR1H2;ZBTB16;USP2;ARID5A;SIRT7;SREBF2;SMAD7;DRAP1;PER2;PER1;PER3;NR4A3;DDIT3;CRY2;ERF;CRY1;MAFK;UBE2V1;PPID
Intrinsic Apoptotic Signaling Pathway By P53 Class Mediator (GO:0072332)	5/29	0.00473286	0.257235	0	0	5.19501	27.8101	BAG6;DDX5;HINT1;FHIT;RRP8
Positive Regulation Of Protein Catabolic Process (GO:0045732)	9/83	0.00478659	0.257235	0	0	3.04161	16.2481	HSP90AA1;EGLN2;PSMC3;DDRGK1;PSMC2;VPS11;MSN;OAZ1;TNFSF13B
Positive Regulation Of Protein Metabolic Process (GO:0051247)	15/182	0.00492515	0.259869	0	0	2.25386	11.9756	HSP90AA1;EGLN2;DDX3X;LDB1;NR1H2;CD80;MSN;EEF2;OAZ1;CLU;TNFSF13B;NFKBIA;RBM3;VPS11;PLXNB2
Negative Regulation Of RNA Splicing (GO:0033119)	4/19	0.00545385	0.27461	0	0	6.64344	34.6219	PCBP4;U2AF2;SRSF6;SRSF9
Cardiac Muscle Tissue Morphogenesis (GO:0055008)	5/30	0.00550147	0.27461	0	0	4.98692	25.9456	MYL2;MYL3;ANKRD1;TNNI3;SMAD7
Adipose Tissue Development (GO:0060612)	3/10	0.00567767	0.27461	0	0	10.6665	55.1585	DGAT2;NAMPT;RORC
Mitochondrial Electron Transport, Ubiquinol To Cytochrome C (GO:0006122)	3/10	0.00567767	0.27461	0	0	10.6665	55.1585	UQCRC1;UQCRFS1;UQCRH
Mitochondrial Genome Maintenance (GO:0000002)	3/10	0.00567767	0.27461	0	0	10.6665	55.1585	LONP1;SLC25A33;SLC25A4
Blood Circulation (GO:0008015)	6/43	0.00596737	0.28389	0	0	4.0465	20.7239	NPPB;ACTC1;MYL2;TNNI3;GCLM;SOD1
Positive Regulation Of DNA-templated Transcription (GO:0045893)	60/1115	0.00621896	0.291087	0	0	1.44875	7.35989	DDX3X;LDB1;PTPRN;CD80;RORC;HMGB1;ACTB;MED12;FLCN;ING2;CHCHD2;TBK1;DBP;TRIM28;NAMPT;IER5;MAP2K3;EIF5A;PEG3;LMO2;PTOV1;NME2;SIRT7;SREBF2;KAT2A;ELF4;DDIT3;ZSCAN21;UBE2V1;SQSTM1;IRF9;RNASEL;CEBPB;SHC1;STXBP2;GPS2;PIK3R2;FOXO3;RELA;DDRGK1;MAP2K7;SF3B1;WWOX;JUN;JUND;NR1H2;STAT2;ZBTB16;CHCHD10;RFXANK;FOSL2;NFKBIA;PER1;NR4A1;KLF6;NR4A3;PSMC3;CTNNB1;NFE2L2;ZPR1
Regulation Of Interferon-Beta Production (GO:0032648)	6/44	0.00668819	0.303268	0	0	3.93978	19.7281	HSP90AA1;DDX3X;TBK1;POLR3D;FLOT1;PTPN11
Pyruvate Metabolic Process (GO:0006090)	6/44	0.00668819	0.303268	0	0	3.93978	19.7281	LDHA;PFKL;NR4A3;PGK1;PDHB;GAPDH
Negative Regulation Of Intrinsic Apoptotic Signaling Pathway (GO:2001243)	7/58	0.006903	0.308192	0	0	3.42717	17.0529	DNAJA1;DDX3X;NME5;CLU;PPIA;HERPUD1;NFE2L2
Regulation Of Erythrocyte Differentiation (GO:0045646)	5/32	0.00729536	0.310002	0	0	4.61698	22.7179	HSPA9;ZFP36;CDK6;LDB1;FOXO3
Positive Regulation Of Neuron Death (GO:1901216)	5/32	0.00729536	0.310002	0	0	4.61698	22.7179	PRNP;DDIT3;CTNNB1;FOXO3;CLU
Regulation Of G2/M Transition Of Mitotic Cell Cycle (GO:0010389)	5/32	0.00729536	0.310002	0	0	4.61698	22.7179	RAD51B;CENPF;CDK6;CDK2;TNFSF13B
Regulation Of Apoptotic Process (GO:0042981)	37/627	0.00755823	0.310002	0	0	1.58596	7.7476	DDX3X;SHC1;DIABLO;HMGB1;FOXO3;CLU;ACTB;RELA;RTN4;HSPD1;FLCN;SCIN;ADAMTSL4;DDRGK1;ANKRD1;PIM3;CCNL2;CTSD;TGM2;HSPA9;JUN;HSP90AA1;EGLN2;GADD45B;ANXA4;SIAH2;NME2;HYPK;SOD1;DNAJA1;PLSCR3;FKBP8;CTNNB1;CRYAB;SQSTM1;PPIA;PPID
Positive Regulation Of Heterochromatin Formation (GO:0031453)	3/11	0.00758387	0.310002	0	0	9.33261	45.5593	TRIM28;CDK2;RESF1
Regulation Of Protein Ubiquitination (GO:0031396)	10/105	0.00758448	0.310002	0	0	2.63312	12.854	DNAJA1;PER2;HSP90AA1;U2AF2;PHF23;CRY1;CTNNB1;SIRT7;SQSTM1;SMAD7
Translation (GO:0006412)	16/211	0.00826175	0.33083	0	0	2.05855	9.87307	EIF5A;RPS9;RPL21;MRPS23;MRPL38;RPL10A;EEF2;MRPL53;RPS27;MTG1;EEF1A2;RPL36;RPLP2;RPL38;RPS2;UBA52
Positive Regulation Of Intracellular Protein Transport (GO:0090316)	11/123	0.00832944	0.33083	0	0	2.45795	11.7686	PRNP;TRIM28;SAR1A;HSPA1L;MBD1;VPS11;PIK3R2;MIEF2;OAZ1;SREBF2;ZPR1
Cellular Response To Monoamine Stimulus (GO:0071868)	2/4	0.00855006	0.33083	0	0	24.8596	118.377	NR4A3;TGM2
Regulation Of T Cell Mediated Immune Response To Tumor Cell (GO:0002840)	2/4	0.00855006	0.33083	0	0	24.8596	118.377	HMGB1;HSPD1
Response To Endoplasmic Reticulum Stress (GO:0034976)	10/108	0.00918772	0.350826	0	0	2.55207	11.9689	BAG6;JUN;CEBPB;OS9;DDRGK1;DDIT3;FLOT1;PIK3R2;UBXN6;HERPUD1
Positive Regulation Of Neuron Apoptotic Process (GO:0043525)	4/22	0.00938875	0.353846	0	0	5.53524	25.8398	PRNP;DDIT3;CTNNB1;FOXO3
Positive Regulation Of ERAD Pathway (GO:1904294)	3/12	0.00982367	0.363356	0	0	8.29517	38.3482	BAG6;HERPUD1;NFE2L2
Spliceosomal Complex Assembly (GO:0000245)	7/62	0.00989149	0.363356	0	0	3.17718	14.6661	SRSF1;RSRP1;SNRPF;SRSF5;SRSF6;SF3B1;SRSF9
Carbohydrate Catabolic Process (GO:0016052)	5/35	0.0106939	0.385935	0	0	4.15455	18.8537	LDHA;PFKL;PGK1;MAN2C1;GAPDH
mRNA Splicing, Via Spliceosome (GO:0000398)	15/199	0.0108876	0.385935	0	0	2.04357	9.23723	SRRM2;PRMT5;DDX5;SRSF1;DDX41;SNRNP70;SYF2;U2AF2;SDE2;RSRP1;SNRPF;SRSF5;SRSF6;SF3B1;SRSF9
Chaperone Cofactor-Dependent Protein Refolding (GO:0051085)	4/23	0.0110233	0.385935	0	0	5.2436	23.6368	HSPA9;HSPA1L;PTGES3;HSPE1
Ribonucleoprotein Complex Biogenesis (GO:0022613)	10/111	0.0110381	0.385935	0	0	2.47583	11.1571	NOP56;FBL;RPS9;RPS27;RRS1;MPHOSPH10;RPL38;URB2;SDAD1;RRP9
Positive Regulation Of Pattern Recognition Receptor Signaling Pathway (GO:0062208)	5/36	0.0120322	0.395047	0	0	4.0203	17.7704	DDX3X;FLOT1;HMGB1;DDX60;RTN4
Regulation Of Cellular Component Biogenesis (GO:0044087)	5/36	0.0120322	0.395047	0	0	4.0203	17.7704	RAP1B;HSP90AA1;VPS11;MSN;PTPN11
Regulation Of Establishment Of Protein Localization (GO:0070201)	3/13	0.0124076	0.395047	0	0	7.46522	32.7682	DNAJA1;SPIDR;CTSD
Cellular Response To Arsenic-Containing Substance (GO:0071243)	3/13	0.0124076	0.395047	0	0	7.46522	32.7682	DDX3X;GSTO1;MKNK2
Respiratory Electron Transport Chain (GO:0022904)	3/13	0.0124076	0.395047	0	0	7.46522	32.7682	SLC25A18;UQCRFS1;ETFB
Sterol Transport (GO:0015918)	4/24	0.0128306	0.395047	0	0	4.98113	21.6974	STARD3;GRAMD1A;OSBPL5;LCAT
Ventricular Cardiac Muscle Tissue Development (GO:0003229)	4/24	0.0128306	0.395047	0	0	4.98113	21.6974	MYL2;MYL3;TNNI3;SMAD7
Mitochondrial Respiratory Chain Complex Assembly (GO:0033108)	8/81	0.0131168	0.395047	0	0	2.73685	11.8611	COX19;NDUFB7;NDUFS5;NDUFA3;COX17;TMEM126A;UQCRFS1;SLC25A33
Regulation Of Circadian Sleep/Wake Cycle (GO:0042749)	2/5	0.0138852	0.395047	0	0	16.5721	70.8778	PER3;PTGDS
Regulation Of Circadian Sleep/Wake Cycle, Sleep (GO:0045187)	2/5	0.0138852	0.395047	0	0	16.5721	70.8778	PER3;PTGDS
PERK-mediated Unfolded Protein Response (GO:0036499)	2/5	0.0138852	0.395047	0	0	16.5721	70.8778	DDIT3;NFE2L2
Sequestering Of Actin Monomers (GO:0042989)	2/5	0.0138852	0.395047	0	0	16.5721	70.8778	SCIN;TWF1
Ketone Body Biosynthetic Process (GO:0046951)	2/5	0.0138852	0.395047	0	0	16.5721	70.8778	ACSS3;HMGCS2
Plasma Membrane Raft Assembly (GO:0044854)	2/5	0.0138852	0.395047	0	0	16.5721	70.8778	FLOT1;EMP2
Plasma Membrane Raft Organization (GO:0044857)	2/5	0.0138852	0.395047	0	0	16.5721	70.8778	FLOT1;EMP2
Positive Regulation Of Protein K63-linked Ubiquitination (GO:1902523)	2/5	0.0138852	0.395047	0	0	16.5721	70.8778	DDX3X;UBE2V1
Positive Regulation Of Striated Muscle Contraction (GO:0045989)	2/5	0.0138852	0.395047	0	0	16.5721	70.8778	GSTO1;NPPA
Proline Metabolic Process (GO:0006560)	2/5	0.0138852	0.395047	0	0	16.5721	70.8778	ALDH4A1;PRODH
Protein Localization To Perinuclear Region Of Cytoplasm (GO:1905719)	2/5	0.0138852	0.395047	0	0	16.5721	70.8778	HOOK2;SQSTM1
Ubiquitin-Dependent Protein Catabolic Process (GO:0006511)	22/343	0.0148512	0.412282	0	0	1.72198	7.24895	KLHDC3;SIAH2;ZFAND2B;RAD23A;PSMA7;HERPUD1;TNFSF13B;BAG6;PSMD7;PSMA4;OS9;PSMC3;PSMC4;PSMD2;DDIT3;PSMC1;PSMD3;PSMC2;CTNNB1;SQSTM1;FBXL7;NFE2L2
Heart Contraction (GO:0060047)	5/38	0.0150401	0.412282	0	0	3.77621	15.8489	ACTC1;MYL2;MYL3;TNNI3;SOD1
Positive Regulation Of Viral Process (GO:0048524)	5/38	0.0150401	0.412282	0	0	3.77621	15.8489	DDX3X;RAD23A;PPIA;TARBP2;PPID
Electron Transport Chain (GO:0022900)	3/14	0.0153434	0.412282	0	0	6.78617	28.3463	NDOR1;UQCRFS1;ETFB
Mitophagy (GO:0000423)	3/14	0.0153434	0.412282	0	0	6.78617	28.3463	MAP1LC3B;ARFIP2;SQSTM1
Regulation Of Cell Cycle G2/M Phase Transition (GO:1902749)	3/14	0.0153434	0.412282	0	0	6.78617	28.3463	CENPF;CDK6;CDK2
Regulation Of Fat Cell Differentiation (GO:0045598)	7/68	0.0160003	0.425991	0	0	2.86367	11.8417	ZFP36;CEBPB;NOCT;ZBTB16;RORC;GPS2;RUNX1T1
Glycolytic Process (GO:0006096)	4/26	0.0169856	0.426809	0	0	4.52777	18.4525	LDHA;PFKL;PGK1;GAPDH
Negative Regulation Of DNA Binding (GO:0043392)	4/26	0.0169856	0.426809	0	0	4.52777	18.4525	NFKBIA;PER2;JUN;SUMO3
Positive Regulation Of Leukocyte Cell-Cell Adhesion (GO:1903039)	4/26	0.0169856	0.426809	0	0	4.52777	18.4525	NR4A3;RELA;RHOA;HSPD1
Negative Regulation Of Translation (GO:0017148)	9/102	0.0175284	0.426809	0	0	2.41752	9.77627	ZFP36;CPEB1;BTG2;DDX3X;IFRD2;SHMT1;EIF4EBP1;EIF4EBP3;GAPDH
Regulation Of Translation (GO:0006417)	14/192	0.0176922	0.426809	0	0	1.96942	7.94588	EIF4A2;BTG2;DDX3X;IFRD2;SHMT1;NOLC1;FOXO3;EEF2;BZW1;PUM3;RBM3;MTG1;PLXNB2;GAPDH
Regulation Of mRNA Splicing, Via Spliceosome (GO:0048024)	8/86	0.0183151	0.426809	0	0	2.56066	10.2427	RBM3;PRMT5;DDX5;PCBP4;U2AF2;RBM7;SRSF6;SRSF9
Cardiac Ventricle Morphogenesis (GO:0003208)	5/40	0.0185129	0.426809	0	0	3.56001	14.2019	MYL2;MYL3;TNNI3;SMAD7;TGFBR2
Negative Regulation Of Cold-Induced Thermogenesis (GO:0120163)	5/40	0.0185129	0.426809	0	0	3.56001	14.2019	FLCN;LAMA4;NR1H2;DDIT3;IP6K1
Negative Regulation Of Amyloid-Beta Formation (GO:1902430)	3/15	0.0186361	0.426809	0	0	6.22029	24.7733	PRNP;CLU;RTN4
Negative Regulation Of Oxidative Stress-Induced Intrinsic Apoptotic Signaling Pathway (GO:1902176)	3/15	0.0186361	0.426809	0	0	6.22029	24.7733	NME5;PPIA;NFE2L2
Protein Peptidyl-Prolyl Isomerization (GO:0000413)	3/15	0.0186361	0.426809	0	0	6.22029	24.7733	PPIA;PPID;PPIL6
Regulation Of Cartilage Development (GO:0061035)	3/15	0.0186361	0.426809	0	0	6.22029	24.7733	KAT2A;SCIN;ZBTB16
Regulation Of Viral Genome Replication (GO:0045069)	6/55	0.0192344	0.426809	0	0	3.05338	12.0641	RNASEL;DDX3X;RAD23A;PPIA;PPID;TARBP2
Regulation Of Cholesterol Efflux (GO:0010874)	4/27	0.0193432	0.426809	0	0	4.33066	17.0863	NFKBIA;NR1H2;GPS2;SREBF2
Regulation Of Striated Muscle Contraction (GO:0006942)	4/27	0.0193432	0.426809	0	0	4.33066	17.0863	MYL2;RNF207;MYL3;SMAD7
Cytoplasmic Translational Initiation (GO:0002183)	4/27	0.0193432	0.426809	0	0	4.33066	17.0863	EIF4A2;EIF4A1;EIF3L;EIF3G
Iron-Sulfur Cluster Assembly (GO:0016226)	4/27	0.0193432	0.426809	0	0	4.33066	17.0863	HSPA9;NDOR1;FDX2;ISCU
Metallo-Sulfur Cluster Assembly (GO:0031163)	4/27	0.0193432	0.426809	0	0	4.33066	17.0863	HSPA9;NDOR1;FDX2;ISCU
Negative Regulation Of Intracellular Steroid Hormone Receptor Signaling Pathway (GO:0033144)	4/27	0.0193432	0.426809	0	0	4.33066	17.0863	PER1;CRY2;VPS11;CRY1
Positive Regulation Of Proteolysis Involved In Protein Catabolic Process (GO:1903052)	4/27	0.0193432	0.426809	0	0	4.33066	17.0863	PSMC3;DDRGK1;PSMC2;CLU
Positive Regulation Of Proteasomal Protein Catabolic Process (GO:1901800)	8/87	0.0195096	0.426809	0	0	2.5281	9.95274	BAG6;PSMC3;DDRGK1;PSMC2;RAD23A;CSNK1E;CLU;SMAD7
Regulation Of Proteasomal Ubiquitin-Dependent Protein Catabolic Process (GO:0032434)	9/104	0.0196573	0.426809	0	0	2.36634	9.29808	BAG6;DDRGK1;CDK2;RAD23A;CSNK1E;CLU;FHIT;SMAD7;HERPUD1
Positive Regulation Of Catabolic Process (GO:0009896)	7/71	0.0198902	0.426809	0	0	2.72895	10.6908	HSP90AA1;EGLN2;VPS11;MSN;CLU;OAZ1;TNFSF13B
Cellular Response To Laminar Fluid Shear Stress (GO:0071499)	2/6	0.0202962	0.426809	0	0	12.4284	48.4373	SREBF2;NFE2L2
Ketone Body Metabolic Process (GO:1902224)	2/6	0.0202962	0.426809	0	0	12.4284	48.4373	ACSS3;HMGCS2
Nuclear-Transcribed mRNA Catabolic Process, Deadenylation-Independent Decay (GO:0031086)	2/6	0.0202962	0.426809	0	0	12.4284	48.4373	EDC4;ZFP36
Nucleobase Biosynthetic Process (GO:0046112)	2/6	0.0202962	0.426809	0	0	12.4284	48.4373	SHMT1;CTPS2
Positive Regulation Of ER-associated Ubiquitin-Dependent Protein Catabolic Process (GO:1903071)	2/6	0.0202962	0.426809	0	0	12.4284	48.4373	HERPUD1;NFE2L2
Regulation Of Apoptotic Cell Clearance (GO:2000425)	2/6	0.0202962	0.426809	0	0	12.4284	48.4373	HMGB1;TGM2
Negative Regulation Of Amide Metabolic Process (GO:0034249)	8/88	0.0207586	0.433391	0	0	2.49635	9.67285	PRNP;BTG2;DDX3X;IFRD2;SHMT1;CLU;GAPDH;RTN4
'De Novo' Post-Translational Protein Folding (GO:0051084)	4/28	0.0218931	0.449177	0	0	4.14998	15.8595	HSPA9;HSPA1L;PTGES3;HSPE1
Integrated Stress Response Signaling (GO:0140467)	4/28	0.0218931	0.449177	0	0	4.14998	15.8595	CEBPB;JUN;DDIT3;NFE2L2
Negative Regulation Of Nucleic Acid-Templated Transcription (GO:1903507)	24/398	0.0221647	0.449177	0	0	1.61205	6.1407	EIF4A2;JUN;HDAC10;LDB1;SHC1;CIPC;NR1H2;ZBTB16;ARID5A;RRP8;RELA;CIART;PER2;PER1;CENPF;TRIM28;DDIT3;CRY2;CRY1;CTNNB1;UBE2V1;CIC;CRYAB;RUNX1T1
Alternative mRNA Splicing, Via Spliceosome (GO:0000380)	3/16	0.0222886	0.449177	0	0	5.74147	21.8387	DDX5;SRSF1;SRSF6
Positive Regulation Of Transcription From RNA Polymerase II Promoter In Response To Stress (GO:0036003)	3/16	0.0222886	0.449177	0	0	5.74147	21.8387	CEBPB;DDIT3;NFE2L2
mRNA Splice Site Recognition (GO:0006376)	4/29	0.0246387	0.454232	0	0	3.98374	14.7535	SRSF1;SRSF5;SRSF6;SRSF9
Regulation Of Signal Transduction By P53 Class Mediator (GO:1901796)	5/43	0.024648	0.454232	0	0	3.27838	12.14	PRMT5;PIP4P1;USP2;RRS1;URB2
MAPK Cascade (GO:0000165)	8/91	0.0248441	0.454232	0	0	2.4057	8.88938	MAP2K3;BRAP;DUSP5;ZFP36;NRTN;MAP2K7;MAPK12;DUSP7
Regulation Of RNA Splicing (GO:0043484)	8/91	0.0248441	0.454232	0	0	2.4057	8.88938	CLK1;KAT2A;AHNAK;SNRNP70;U2AF2;SRSF1;CCNL2;ZPR1
Regulation Of Autophagy (GO:0010506)	15/221	0.025684	0.454232	0	0	1.82297	6.67549	PIK3R2;HMGB1;FOXO3;SREBF2;FLCN;TBK1;CAPNS1;DDIT3;EEF1A2;FKBP8;ATP6V1E1;RNF152;ATP6V0C;SQSTM1;GAPDH
Regulation Of Protein Catabolic Process (GO:0042176)	9/109	0.0257875	0.454232	0	0	2.24737	8.22057	RHBDF1;HSP90AA1;EGLN2;HGS;EEF1A2;VPS11;MSN;OAZ1;TNFSF13B
Negative Regulation Of Amyloid Precursor Protein Catabolic Process (GO:1902992)	3/17	0.0263016	0.454232	0	0	5.33106	19.3951	PRNP;CLU;RTN4
Negative Regulation Of Lipid Storage (GO:0010888)	3/17	0.0263016	0.454232	0	0	5.33106	19.3951	NFKBIA;NR1H2;PNPLA2
Prostaglandin Biosynthetic Process (GO:0001516)	3/17	0.0263016	0.454232	0	0	5.33106	19.3951	PTGES2;PTGES3;PTGDS
Positive Regulation Of Cellular Process (GO:0048522)	29/511	0.0265419	0.454232	0	0	1.51303	5.49083	DDX3X;SHC1;COX17;IRS2;ACTB;RELA;GNAI2;FLCN;ZFP36;CAPNS1;DDRGK1;CSPP1;NAMPT;CCN2;PRODH;IER5;CFAP20;TGM2;RPS9;EMP2;RAD23A;VEGFD;TGFBR2;SLC6A6;CDK2;CTNNB1;MVD;SLC25A33;ZPR1
Ribosome Biogenesis (GO:0042254)	11/146	0.0268777	0.454232	0	0	2.03644	7.3647	NOP56;FBL;RPS9;RPS27;SBDS;RRS1;NOLC1;MPHOSPH10;URB2;SDAD1;RRP9
Autophagy Of Mitochondrion (GO:0000422)	5/44	0.0269506	0.454232	0	0	3.19413	11.5428	MAP1LC3B;GABARAPL1;ARFIP2;WDR45;SQSTM1
Positive Regulation Of Macromolecule Biosynthetic Process (GO:0010557)	9/110	0.0271593	0.454232	0	0	2.22499	8.02338	RBM3;SMOC2;DDX3X;LDB1;NAMPT;PLXNB2;IRS2;RFXANK;EEF2
Cellular Response To Vascular Endothelial Growth Factor Stimulus (GO:0035924)	4/30	0.0275829	0.454232	0	0	3.8303	13.7529	MAP2K3;NR4A1;VEGFD;RELA
Platelet Aggregation (GO:0070527)	4/30	0.0275829	0.454232	0	0	3.8303	13.7529	GNAS;PPIA;MYL12A;ACTG1
Regulation Of Amyloid-Beta Formation (GO:1902003)	4/30	0.0275829	0.454232	0	0	3.8303	13.7529	PRNP;CLU;RELA;RTN4
Regulation Of Chaperone-Mediated Autophagy (GO:1904714)	2/7	0.0276919	0.454232	0	0	9.94211	35.6585	SNRNP70;EEF1A2
Regulation Of Chromosome Condensation (GO:0060623)	2/7	0.0276919	0.454232	0	0	9.94211	35.6585	SMC4;SMC2
Cellular Response To Nitrogen Levels (GO:0043562)	2/7	0.0276919	0.454232	0	0	9.94211	35.6585	GABARAPL1;MAP1LC3B
Cellular Response To Nitrogen Starvation (GO:0006995)	2/7	0.0276919	0.454232	0	0	9.94211	35.6585	GABARAPL1;MAP1LC3B
Regulation Of Vascular Wound Healing (GO:0061043)	2/7	0.0276919	0.454232	0	0	9.94211	35.6585	SMOC2;SERPINE1
Respiratory Chain Complex III Assembly (GO:0017062)	2/7	0.0276919	0.454232	0	0	9.94211	35.6585	UQCRFS1;SLC25A33
Diacylglycerol Biosynthetic Process (GO:0006651)	2/7	0.0276919	0.454232	0	0	9.94211	35.6585	DGAT2;PNPLA2
Mitochondrial Respiratory Chain Complex III Assembly (GO:0034551)	2/7	0.0276919	0.454232	0	0	9.94211	35.6585	UQCRFS1;SLC25A33
Negative Regulation Of Intracellular Transport (GO:0032387)	2/7	0.0276919	0.454232	0	0	9.94211	35.6585	MRLN;CRYAB
Negative Regulation Of Protein K63-linked Ubiquitination (GO:1900045)	2/7	0.0276919	0.454232	0	0	9.94211	35.6585	PARP10;GPS2
p38MAPK Cascade (GO:0038066)	2/7	0.0276919	0.454232	0	0	9.94211	35.6585	MAP2K3;ZFP36
Plasma Membrane Phospholipid Scrambling (GO:0017121)	2/7	0.0276919	0.454232	0	0	9.94211	35.6585	PLSCR3;PLSCR4
Positive Regulation Of Cardiac Epithelial To Mesenchymal Transition (GO:0062043)	2/7	0.0276919	0.454232	0	0	9.94211	35.6585	EMP2;TGFBR2
Positive Regulation Of Chromosome Condensation (GO:1905821)	2/7	0.0276919	0.454232	0	0	9.94211	35.6585	SMC4;SMC2
Protein Localization To Ciliary Transition Zone (GO:1904491)	2/7	0.0276919	0.454232	0	0	9.94211	35.6585	TCTN2;TCTN1
Regulation Of DNA-templated Transcription In Response To Stress (GO:0043620)	2/7	0.0276919	0.454232	0	0	9.94211	35.6585	DDIT3;RELA
Actomyosin Structure Organization (GO:0031032)	7/76	0.027761	0.454232	0	0	2.53046	9.0695	EPB41L2;CDC42BPG;ANKRD1;PHACTR1;MYOM2;RHOA;LMOD2
Protein Catabolic Process (GO:0030163)	8/93	0.0278612	0.454232	0	0	2.34882	8.40999	BAG6;HSP90AA1;LONP1;OGA;CTSF;SQSTM1;USE1;CTSD
Positive Regulation Of Cell Cycle (GO:0045787)	6/60	0.0282855	0.458572	0	0	2.76985	9.87565	SMOC2;CCND3;USP2;EIF4EBP1;RAD23A;ZPR1
Ribosome Assembly (GO:0042255)	5/45	0.0293856	0.473762	0	0	3.1141	10.9842	TRAF7;DDX3X;RPS27;SBDS;RRS1
Negative Regulation Of Type II Interferon Production (GO:0032689)	3/18	0.0306739	0.47905	0	0	4.97536	17.3359	PRNP;DDIT3;HMGB1
Positive Regulation Of Cholesterol Efflux (GO:0010875)	3/18	0.0306739	0.47905	0	0	4.97536	17.3359	NFKBIA;NR1H2;GPS2
Arachidonic Acid Metabolic Process (GO:0019369)	4/31	0.0307279	0.47905	0	0	3.68822	12.8445	GPX4;PTGES2;PTGES3;PTGDS
Positive Regulation Of RNA Splicing (GO:0033120)	4/31	0.0307279	0.47905	0	0	3.68822	12.8445	RBM3;PRMT5;U2AF2;ZPR1
Regulation Of Blood Circulation (GO:1903522)	4/31	0.0307279	0.47905	0	0	3.68822	12.8445	PER2;DES;DMPK;HSPB7
RNA Splicing, Via Transesterification Reactions With Bulged Adenosine As Nucleophile (GO:0000377)	12/168	0.0307693	0.47905	0	0	1.92296	6.6943	SRRM2;DDX5;SNRNP70;SYF2;U2AF2;SRSF1;SNRPF;SRSF5;DDX41;SRSF6;SF3B1;SRSF9
Negative Regulation Of Metabolic Process (GO:0009892)	5/46	0.0319551	0.47905	0	0	3.03797	10.461	FLCN;DDIT3;LAMA4;NR1H2;IP6K1
Positive Regulation Of Transport (GO:0051050)	5/46	0.0319551	0.47905	0	0	3.03797	10.461	CEBPB;SCIN;FLOT1;CHCHD10;ACTB
Regulation Of TORC1 Signaling (GO:1903432)	5/46	0.0319551	0.47905	0	0	3.03797	10.461	FLCN;PIP4P1;CASTOR2;RNF152;GPR137C
Regulation Of DNA-templated Transcription (GO:0006355)	73/1519	0.0322111	0.47905	0	0	1.28116	4.40134	HDAC10;LDB1;PHF1;CD80;RORC;HIF3A;HMGB1;RRP8;ACTB;MED12;ING2;HINT1;DBP;TRIM28;ANKRD1;CCNL2;CIC;MAP2K3;BRD2;PRMT5;KLF13;ANXA4;RFX2;EBF1;NME2;ARID5A;RFX1;SIRT7;POU5F2;KAT2A;ELF4;DDIT3;ZSCAN21;MED20;CRY2;ERF;CRY1;UBE2V1;CRYAB;IRF9;CEBPB;DDX5;SHC1;CIPC;GPS2;FOXO3;RELA;CIART;REPIN1;MAP2K7;APBB3;RUNX1T1;CDK18;JUN;JUND;BRPF3;NR1H2;STAT2;ZBTB16;RFXANK;FOSL2;SMAD7;ZBTB9;PER2;PER1;NR4A1;CENPF;KLF6;NR4A3;TEF…
Regulation Of RNA Metabolic Process (GO:0051252)	7/79	0.0333776	0.47905	0	0	2.4246	8.24334	CLK1;KAT2A;AHNAK;SNRNP70;SRSF1;CCNL2;TARBP2
Negative Regulation Of JNK Cascade (GO:0046329)	4/32	0.0340755	0.47905	0	0	3.55629	12.0173	DNAJA1;PER1;NPPA;GPS2
Positive Regulation Of Telomerase Activity (GO:0051973)	4/32	0.0340755	0.47905	0	0	3.55629	12.0173	HSP90AA1;PTGES3;CTNNB1;MAP2K7
Regulation Of Cardiac Muscle Contraction (GO:0055117)	4/32	0.0340755	0.47905	0	0	3.55629	12.0173	RNF207;NPPA;TNNI3;SMAD7
Regulation Of Proteasomal Protein Catabolic Process (GO:0061136)	5/47	0.0346607	0.47905	0	0	2.96546	9.97032	RHBDF1;PSMC3;DDRGK1;PSMC2;RAD23A
Regulation Of Cell Death (GO:0010941)	5/47	0.0346607	0.47905	0	0	2.96546	9.97032	TBK1;CCN2;PRODH;CLU;CRYAB
Long-Term Memory (GO:0007616)	3/19	0.0354027	0.47905	0	0	4.66413	15.5827	PRNP;KAT2A;CAMK2N1
Negative Regulation Of Actin Filament Polymerization (GO:0030837)	3/19	0.0354027	0.47905	0	0	4.66413	15.5827	SCIN;TWF1;PFN1
Negative Regulation Of Extrinsic Apoptotic Signaling Pathway Via Death Domain Receptors (GO:1902042)	3/19	0.0354027	0.47905	0	0	4.66413	15.5827	DDX3X;SERPINE1;TMBIM1
Positive Regulation Of Interferon-Alpha Production (GO:0032727)	3/19	0.0354027	0.47905	0	0	4.66413	15.5827	DDX3X;TBK1;HSPD1
Positive Regulation Of Signal Transduction By P53 Class Mediator (GO:1901798)	3/19	0.0354027	0.47905	0	0	4.66413	15.5827	EIF5A;DDX5;PLA2R1
mRNA Metabolic Process (GO:0016071)	7/80	0.0354061	0.47905	0	0	2.39125	7.98886	ATXN2L;ZFP36;DDX5;U2AF2;SRSF1;SRSF5;SRSF9
Adherens Junction Assembly (GO:0034333)	2/8	0.0359865	0.47905	0	0	8.28461	27.5431	CTNNB1;SMAD7
Regulation Of miRNA Metabolic Process (GO:2000628)	2/8	0.0359865	0.47905	0	0	8.28461	27.5431	DDX5;RELA
cGMP Biosynthetic Process (GO:0006182)	2/8	0.0359865	0.47905	0	0	8.28461	27.5431	NPPB;NPPA
Regulation Of Tau-Protein Kinase Activity (GO:1902947)	2/8	0.0359865	0.47905	0	0	8.28461	27.5431	HSP90AA1;CLU
Endothelial Tube Morphogenesis (GO:0061154)	2/8	0.0359865	0.47905	0	0	8.28461	27.5431	CTNNB1;RHOA
Tricarboxylic Acid Metabolic Process (GO:0072350)	2/8	0.0359865	0.47905	0	0	8.28461	27.5431	IDH3G;IDH2
Histone Methylation (GO:0016571)	2/8	0.0359865	0.47905	0	0	8.28461	27.5431	FBL;PRMT5
Myelin Maintenance (GO:0043217)	2/8	0.0359865	0.47905	0	0	8.28461	27.5431	CLU;SOD1
Negative Regulation Of T Cell Mediated Immunity (GO:0002710)	2/8	0.0359865	0.47905	0	0	8.28461	27.5431	CD80;SMAD7
Negative Regulation Of Systemic Arterial Blood Pressure (GO:0003085)	2/8	0.0359865	0.47905	0	0	8.28461	27.5431	NPPB;NPPA
Organic Cyclic Compound Catabolic Process (GO:1901361)	2/8	0.0359865	0.47905	0	0	8.28461	27.5431	ALDH4A1;PRODH
Positive Regulation Of DNA Methylation-Dependent Heterochromatin Formation (GO:0090309)	2/8	0.0359865	0.47905	0	0	8.28461	27.5431	TRIM28;RESF1
Positive Regulation Of Early Endosome To Late Endosome Transport (GO:2000643)	2/8	0.0359865	0.47905	0	0	8.28461	27.5431	VPS11;MSN
Receptor Guanylyl Cyclase Signaling Pathway (GO:0007168)	2/8	0.0359865	0.47905	0	0	8.28461	27.5431	NPPB;NPPA
Regulation Of ER-associated Ubiquitin-Dependent Protein Catabolic Process (GO:1903069)	2/8	0.0359865	0.47905	0	0	8.28461	27.5431	HERPUD1;NFE2L2
Regulation Of RNA Polymerase II Regulatory Region Sequence-Specific DNA Binding (GO:1903025)	2/8	0.0359865	0.47905	0	0	8.28461	27.5431	DDRGK1;DDIT3
Macroautophagy (GO:0016236)	8/98	0.0364903	0.481024	0	0	2.21768	7.34209	GABARAPL1;MAP1LC3B;HDAC10;HGS;MTMR14;SQSTM1;UBXN6;VPS16
Positive Regulation Of DNA Biosynthetic Process (GO:2000573)	6/64	0.0372706	0.481024	0	0	2.57823	8.48121	CCT6A;SMOC2;HSP90AA1;PTGES3;CTNNB1;MAP2K7
Positive Regulation Of Cellular Metabolic Process (GO:0031325)	5/48	0.0375039	0.481024	0	0	2.89633	9.50955	CHCHD2;GHITM;YPEL3;TGFBR2;IFNAR1
Protein Homotetramerization (GO:0051289)	5/48	0.0375039	0.481024	0	0	2.89633	9.50955	SHMT1;CTH;AQP4;ALDOA;CLU
Positive Regulation Of Proteasomal Ubiquitin-Dependent Protein Catabolic Process (GO:0032436)	7/81	0.0375145	0.481024	0	0	2.3588	7.744	DDRGK1;RAD23A;CSNK1E;CLU;HERPUD1;SMAD7;NFE2L2
Ventricular Cardiac Muscle Tissue Morphogenesis (GO:0055010)	4/33	0.0376266	0.481024	0	0	3.43346	11.2619	MYL2;MYL3;TNNI3;SMAD7
Mitochondrial Electron Transport, NADH To Ubiquinone (GO:0006120)	4/33	0.0376266	0.481024	0	0	3.43346	11.2619	NDUFB7;NDUFA3;NDUFS5;NDUFV3
Negative Regulation Of Transferase Activity (GO:0051348)	4/33	0.0376266	0.481024	0	0	3.43346	11.2619	EIF4A2;ZFP36;IRS2;SMAD7
Positive Regulation Of RNA Metabolic Process (GO:0051254)	4/33	0.0376266	0.481024	0	0	3.43346	11.2619	U2AF2;SIRT7;RELA;ZPR1
Positive Regulation Of Gene Expression (GO:0010628)	24/422	0.0399852	0.508585	0	0	1.51268	4.86967	DDX3X;PHF1;MSN;SIRT7;EEF2;CLU;RELA;ACTG1;SOD1;RBM3;KAT2A;ACTC1;DDRGK1;U2AF2;DNAJA4;HGS;RNF207;FLOT1;PLXNB2;PLA2R1;GAPDH;NFE2L2;RBMS3;ZPR1
Regulation Of Keratinocyte Differentiation (GO:0045616)	3/20	0.0404835	0.508585	0	0	4.38951	14.0766	ZFP36;NME2;SRSF6
Regulation Of Transferase Activity (GO:0051338)	3/20	0.0404835	0.508585	0	0	4.38951	14.0766	LDB1;EMP2;PUM3
Peptidyl-Proline Modification (GO:0018208)	3/20	0.0404835	0.508585	0	0	4.38951	14.0766	PPIA;PPID;PPIL6
Negative Regulation Of Cellular Process (GO:0048523)	26/466	0.0408458	0.508859	0	0	1.48303	4.74266	BTG2;DDX3X;TOB2;CLU;RRP8;ACTB;RTN4;NPPB;TCHP;FLCN;SCIN;ADAMTS1;CCN2;TNS2;DUSP1;NR1H2;PODN;NR4A1;CDK6;HGS;MYL2;TXNIP;PLXNB2;CTNNB1;CRYAB;VAMP3
Connective Tissue Development (GO:0061448)	4/34	0.041382	0.508859	0	0	3.31882	10.5701	DDRGK1;ZBTB16;NAMPT;RORC
Translational Elongation (GO:0006414)	4/34	0.041382	0.508859	0	0	3.31882	10.5701	EIF5A;TCF25;EEF1A2;EEF2
Membrane Assembly (GO:0071709)	4/34	0.041382	0.508859	0	0	3.31882	10.5701	IL1RAPL1;NRXN2;EMP2;TLCD1
Mitochondrion Disassembly (GO:0061726)	4/34	0.041382	0.508859	0	0	3.31882	10.5701	MAP1LC3B;GABARAPL1;WDR45;SQSTM1
Regulation Of Cell Differentiation (GO:0045595)	12/176	0.0416676	0.510209	0	0	1.8283	5.8104	SLC6A6;PHLDB1;DDX5;CEBPB;SCIN;CDK6;RORC;GPS2;CTNNB1;EMP2;CCN2;SMAD7
Regulation Of Heart Contraction (GO:0008016)	6/66	0.0423753	0.512388	0	0	2.49199	7.87766	SPTBN4;DES;DMPK;RNF207;HSPB7;SMAD7
Cell-Cell Junction Assembly (GO:0007043)	6/66	0.0423753	0.512388	0	0	2.49199	7.87766	FLCN;CTNND1;CTNNB1;RHOA;ACTG1;SMAD7
Positive Regulation Of Protein Transport (GO:0051222)	6/66	0.0423753	0.512388	0	0	2.49199	7.87766	MBD1;ANKRD1;PPIA;OAZ1;APBB3;PPID
Cellular Response To Peptide Hormone Stimulus (GO:0071375)	7/84	0.0443286	0.516406	0	0	2.2665	7.06269	NR4A1;CPEB1;NR4A3;IRS2;PIK3R2;SLC25A33;RELA
[2Fe-2S] Cluster Assembly (GO:0044571)	2/9	0.0450995	0.516406	0	0	7.10068	22.0042	FDX2;ISCU
cGMP Metabolic Process (GO:0046068)	2/9	0.0450995	0.516406	0	0	7.10068	22.0042	NPPB;NPPA
Regulation Of Toll-Like Receptor 9 Signaling Pathway (GO:0034163)	2/9	0.0450995	0.516406	0	0	7.10068	22.0042	HMGB1;RTN4
Response To Sterol (GO:0036314)	2/9	0.0450995	0.516406	0	0	7.10068	22.0042	RORC;TGFBR2
Endosomal Vesicle Fusion (GO:0034058)	2/9	0.0450995	0.516406	0	0	7.10068	22.0042	VPS11;VPS16
Negative Regulation Of Lipid Localization (GO:1905953)	2/9	0.0450995	0.516406	0	0	7.10068	22.0042	NFKBIA;NR1H2
Positive Regulation Of Protein Polyubiquitination (GO:1902916)	2/9	0.0450995	0.516406	0	0	7.10068	22.0042	DDX3X;UBE2V1
Positive Regulation Of Transcription From RNA Polymerase II Promoter In Response To Endoplasmic Reticulum Stress (GO:1990440)	2/9	0.0450995	0.516406	0	0	7.10068	22.0042	CEBPB;DDIT3
Positive Regulation Of Voltage-Gated Potassium Channel Activity (GO:1903818)	2/9	0.0450995	0.516406	0	0	7.10068	22.0042	RNF207;NPPA
Regulation Of Sodium Ion Transport (GO:0002028)	4/35	0.0453418	0.516406	0	0	3.21157	9.93509	NKAIN2;SPTBN4;PER1;WNK4
Negative Regulation Of Mitochondrion Organization (GO:0010823)	4/35	0.0453418	0.516406	0	0	3.21157	9.93509	FLCN;GHITM;CLU;SLC25A4
Negative Regulation Of Stress-Activated MAPK Cascade (GO:0032873)	4/35	0.0453418	0.516406	0	0	3.21157	9.93509	PER1;DUSP1;GPS2;PPIA
Positive Regulation Of Cellular Biosynthetic Process (GO:0031328)	11/159	0.0456033	0.516406	0	0	1.85615	5.73136	RBM3;SMOC2;HSP90AA1;DDX3X;NR1H2;PLXNB2;CTNNB1;IRS2;SIRT7;EEF2;CLU
Regulation Of Histone Deacetylation (GO:0031063)	3/21	0.0459107	0.516406	0	0	4.14541	12.7722	ING2;KAT2A;RRP8
Regulation Of Monocyte Chemotaxis (GO:0090025)	3/21	0.0459107	0.516406	0	0	4.14541	12.7722	DUSP1;SERPINE1;HMGB1
Negative Regulation Of Oxidative Stress-Induced Cell Death (GO:1903202)	3/21	0.0459107	0.516406	0	0	4.14541	12.7722	NME5;PPIA;NFE2L2
Postreplication Repair (GO:0006301)	3/21	0.0459107	0.516406	0	0	4.14541	12.7722	PARP10;UBE2V1;TNFSF13B
rRNA Metabolic Process (GO:0016072)	7/85	0.0467656	0.523991	0	0	2.23731	6.852	NOP56;FBL;RPS27;SBDS;NOLC1;SIRT7;RRP9
mRNA Processing (GO:0006397)	13/200	0.0482088	0.538084	0	0	1.73725	5.26772	SRRM2;RAMAC;DDX5;SRSF1;DDX41;SNRNP70;SYF2;U2AF2;SNRPF;SRSF5;SRSF6;SF3B1;SRSF9
Cellular Response To Molecule Of Bacterial Origin (GO:0071219)	7/86	0.0492865	0.548006	0	0	2.20886	6.6489	ZFP36;CD80;SERPINE1;ANKRD1;HMGB1;RHOA;RELA
Tumor Necrosis Factor-Mediated Signaling Pathway (GO:0033209)	4/36	0.0495055	0.548339	0	0	3.11103	9.35074	EIF5A;NFKBIA;FOXO3;RELA
Small GTPase Mediated Signal Transduction (GO:0007264)	8/105	0.0513454	0.555677	0	0	2.0568	6.10701	BRAP;RASGEF1B;SIAH2;CDK2;ARFIP2;ARHGAP18;RAPGEF5;RGL2
Regulation Of Chondrocyte Differentiation (GO:0032330)	3/22	0.0516773	0.555677	0	0	3.927	11.6347	SCIN;ZBTB16;PTPN11
Vesicle-Mediated Transport Between Endosomal Compartments (GO:0098927)	3/22	0.0516773	0.555677	0	0	3.927	11.6347	MYO1D;HOOK2;EMP2
Organelle Fission (GO:0048285)	3/22	0.0516773	0.555677	0	0	3.927	11.6347	PEX11B;MTFR1L;MTFR2
Positive Regulation Of Protein Secretion (GO:0050714)	6/70	0.0538472	0.555677	0	0	2.3357	6.82399	ANKRD1;IRS2;LRRC8A;PPIA;APBB3;PPID
Regulation Of Cell Cycle (GO:0051726)	16/265	0.0539272	0.555677	0	0	1.607	4.69262	JUN;JUND;GADD45B;RAD23A;ACTB;RRP8;MAPK12;TNFSF13B;PER2;NR4A1;KAT2A;CDK6;PIM3;ANAPC5;CCNL2;ZPR1
L-serine Metabolic Process (GO:0006563)	2/10	0.0549549	0.555677	0	0	6.21274	18.0246	SHMT1;SERINC3
Antigen Processing And Presentation Of Exogenous Peptide Antigen Via MHC Class II (GO:0019886)	2/10	0.0549549	0.555677	0	0	6.21274	18.0246	CTSF;CTSD
Antigen Processing And Presentation Of Peptide Antigen Via MHC Class II (GO:0002495)	2/10	0.0549549	0.555677	0	0	6.21274	18.0246	CTSF;CTSD
Regulation Of Protein Localization To Cajal Body (GO:1904869)	2/10	0.0549549	0.555677	0	0	6.21274	18.0246	CCT6A;MEPCE
Cellular Response To Fluid Shear Stress (GO:0071498)	2/10	0.0549549	0.555677	0	0	6.21274	18.0246	SREBF2;NFE2L2
Regulation Of Tube Diameter (GO:0035296)	2/10	0.0549549	0.555677	0	0	6.21274	18.0246	NPPB;GCLM
Central Nervous System Neuron Axonogenesis (GO:0021955)	2/10	0.0549549	0.555677	0	0	6.21274	18.0246	SPTBN4;HSP90AA1
Defense Response To Tumor Cell (GO:0002357)	2/10	0.0549549	0.555677	0	0	6.21274	18.0246	RELA;RBMS3
Serine Family Amino Acid Biosynthetic Process (GO:0009070)	2/10	0.0549549	0.555677	0	0	6.21274	18.0246	CTH;SERINC3
Establishment Of Epithelial Cell Apical/Basal Polarity (GO:0045198)	2/10	0.0549549	0.555677	0	0	6.21274	18.0246	MSN;RHOA
Vascular Process In Circulatory System (GO:0003018)	2/10	0.0549549	0.555677	0	0	6.21274	18.0246	NPPB;GCLM
Intracellular Copper Ion Homeostasis (GO:0006878)	2/10	0.0549549	0.555677	0	0	6.21274	18.0246	COX19;PRNP
Intrinsic Apoptotic Signaling Pathway In Response To Oxidative Stress (GO:0008631)	2/10	0.0549549	0.555677	0	0	6.21274	18.0246	DIABLO;PRODH
Negative Regulation Of JUN Kinase Activity (GO:0043508)	2/10	0.0549549	0.555677	0	0	6.21274	18.0246	DNAJA1;NPPA
Negative Regulation Of Amyloid Fibril Formation (GO:1905907)	2/10	0.0549549	0.555677	0	0	6.21274	18.0246	CLU;CRYAB
Positive Regulation Of Protein Localization To Cajal Body (GO:1904871)	2/10	0.0549549	0.555677	0	0	6.21274	18.0246	CCT6A;MEPCE
Positive Regulation Of Secretion (GO:0051047)	2/10	0.0549549	0.555677	0	0	6.21274	18.0246	NPPB;SCIN
Regulation Of ERAD Pathway (GO:1904292)	2/10	0.0549549	0.555677	0	0	6.21274	18.0246	BAG6;HERPUD1
Regulation Of T Cell Mediated Immunity (GO:0002709)	2/10	0.0549549	0.555677	0	0	6.21274	18.0246	CD80;HMGB1
Regulation Of Protein Metabolic Process (GO:0051246)	7/89	0.0573586	0.572233	0	0	2.12768	6.08182	RBM3;NFKBIA;HGS;NR1H2;NOLC1;FOXO3;PUM3
Negative Regulation Of MAPK Cascade (GO:0043409)	7/89	0.0573586	0.572233	0	0	2.12768	6.08182	FLCN;DUSP5;DUSP1;PIK3R2;DUSP8;PPIA;DUSP7
Regulation Of Interferon-Alpha Production (GO:0032647)	3/23	0.0577754	0.572233	0	0	3.73043	10.6362	DDX3X;TBK1;HSPD1
Regulation Of Myeloid Cell Differentiation (GO:0045637)	3/23	0.0577754	0.572233	0	0	3.73043	10.6362	HSPA9;CDK6;ZBTB16
Type I Interferon-Mediated Signaling Pathway (GO:0060337)	3/23	0.0577754	0.572233	0	0	3.73043	10.6362	TBK1;STAT2;IFNAR1
Prostaglandin Metabolic Process (GO:0006693)	3/23	0.0577754	0.572233	0	0	3.73043	10.6362	GSTM1;PTGES3;PTGDS
Positive Regulation Of Cell Death (GO:0010942)	4/38	0.0584407	0.574687	0	0	2.92769	8.31388	PRNP;SLC6A6;PRODH;CLU
Phosphate-Containing Compound Metabolic Process (GO:0006796)	11/166	0.0587002	0.574687	0	0	1.77159	5.02302	GK5;DUSP5;PFKL;PIP4P1;GPX4;PGK1;LCAT;DUSP18;IP6K1;DUSP8;ALDOA
Cellular Response To Oxidative Stress (GO:0034599)	8/108	0.0587521	0.574687	0	0	1.99474	5.65396	CHCHD2;JUN;LONP1;PLA2R1;FOXO3;PPIA;SQSTM1;NFE2L2
Response To Lipopolysaccharide (GO:0032496)	9/127	0.0588153	0.574687	0	0	1.90254	5.39057	ZFP36;CD80;NOCT;SERPINE1;ANKRD1;HMGB1;RHOA;RELA;IFNAR1
Mitochondrion Organization (GO:0007005)	10/147	0.0602138	0.581126	0	0	1.8214	5.11786	CHCHD2;LONP1;CHCHD10;MIEF2;MTFR1L;MTFR2;TIMM10;SLC25A4;SLC25A33;HSPD1
Muscle Contraction (GO:0006936)	7/90	0.0602205	0.581126	0	0	2.10192	5.90585	P2RX6;MYL6;DES;ALDOA;CRYAB;MYOM2;LMOD2
Positive Regulation Of Epithelial Cell Proliferation (GO:0050679)	8/109	0.0613632	0.581126	0	0	1.97488	5.51178	NR4A1;EGFL7;NR4A3;PTPRN;NME2;VEGFD;SRSF6;RTN4
Cellular Response To Virus (GO:0098586)	4/39	0.0632092	0.581126	0	0	2.84387	7.8528	EIF5A;HSP90AA1;DDX3X;IFNAR1
Stress-Activated MAPK Cascade (GO:0051403)	4/39	0.0632092	0.581126	0	0	2.84387	7.8528	MAP2K3;ZFP36;GPS2;MAP2K7
Homotypic Cell-Cell Adhesion (GO:0034109)	4/39	0.0632092	0.581126	0	0	2.84387	7.8528	GNAS;PPIA;MYL12A;ACTG1
Regulation Of Cold-Induced Thermogenesis (GO:0120161)	9/129	0.0636489	0.581126	0	0	1.87061	5.15237	PER2;FLCN;CEBPB;FABP4;DDIT3;LAMA4;NR1H2;GNAS;IP6K1
Cellular Response To Type I Interferon (GO:0071357)	3/24	0.0641961	0.581126	0	0	3.55259	9.75474	TBK1;STAT2;IFNAR1
Mitotic G1 DNA Damage Checkpoint Signaling (GO:0031571)	3/24	0.0641961	0.581126	0	0	3.55259	9.75474	CDK2;SDE2;FBXO31
Natural Killer Cell Activation (GO:0030101)	3/24	0.0641961	0.581126	0	0	3.55259	9.75474	BAG6;ELF4;EMP2
Negative Regulation Of Response To Endoplasmic Reticulum Stress (GO:1903573)	3/24	0.0641961	0.581126	0	0	3.55259	9.75474	NR1H2;CLU;HERPUD1
Protein Localization To Cell Surface (GO:0034394)	3/24	0.0641961	0.581126	0	0	3.55259	9.75474	GGA1;CTNNB1;EMP2
Regulation Of Actin Polymerization Or Depolymerization (GO:0008064)	3/24	0.0641961	0.581126	0	0	3.55259	9.75474	ARHGAP18;PFN1;NAA80
Post-Transcriptional Regulation Of Gene Expression (GO:0010608)	5/56	0.065297	0.581126	0	0	2.44086	6.66065	RBM3;PER1;NOLC1;FOXO3;PUM3
T Cell Proliferation (GO:0042098)	2/11	0.0654818	0.581126	0	0	5.52211	15.0532	LMBR1L;MSN
Regulation Of Lipid Kinase Activity (GO:0043550)	2/11	0.0654818	0.581126	0	0	5.52211	15.0532	EEF1A2;PIK3R2
Antigen Processing And Presentation Of Exogenous Peptide Antigen (GO:0002478)	2/11	0.0654818	0.581126	0	0	5.52211	15.0532	CTSF;CTSD
Regulation Of Response To Endoplasmic Reticulum Stress (GO:1905897)	2/11	0.0654818	0.581126	0	0	5.52211	15.0532	NR1H2;CLU
Regulation Of Transcription From RNA Polymerase II Promoter In Response To Stress (GO:0043618)	2/11	0.0654818	0.581126	0	0	5.52211	15.0532	DDIT3;NFE2L2
Dendritic Cell Chemotaxis (GO:0002407)	2/11	0.0654818	0.581126	0	0	5.52211	15.0532	HMGB1;CLU
Xenobiotic Catabolic Process (GO:0042178)	2/11	0.0654818	0.581126	0	0	5.52211	15.0532	GSTM1;GSTO1
Negative Regulation By Host Of Viral Transcription (GO:0043922)	2/11	0.0654818	0.581126	0	0	5.52211	15.0532	JUN;PSMC3
Negative Regulation Of Blood Pressure (GO:0045776)	2/11	0.0654818	0.581126	0	0	5.52211	15.0532	NPPB;NPPA
Negative Regulation Of Macrophage Derived Foam Cell Differentiation (GO:0010745)	2/11	0.0654818	0.581126	0	0	5.52211	15.0532	NFKBIA;NR1H2
Negative Regulation Of Protein Processing (GO:0010955)	2/11	0.0654818	0.581126	0	0	5.52211	15.0532	PRNP;SERPINE1
Positive Regulation Of Behavior (GO:0048520)	2/11	0.0654818	0.581126	0	0	5.52211	15.0532	NR4A3;CFAP20
Positive Regulation Of Cytoplasmic Transport (GO:1903651)	2/11	0.0654818	0.581126	0	0	5.52211	15.0532	VPS11;MSN
Positive Regulation Of Glycogen Metabolic Process (GO:0070875)	2/11	0.0654818	0.581126	0	0	5.52211	15.0532	PHKG2;IRS2
Positive Regulation Of Protein Exit From Endoplasmic Reticulum (GO:0070863)	2/11	0.0654818	0.581126	0	0	5.52211	15.0532	SAR1A;EDEM2
Regulation Of SNARE Complex Assembly (GO:0035542)	2/11	0.0654818	0.581126	0	0	5.52211	15.0532	VPS11;VPS16
Macromolecule Biosynthetic Process (GO:0009059)	11/170	0.0671979	0.594538	0	0	1.72662	4.66206	EIF5A;RPS9;RPS27;RPL21;EEF1A2;RPL36;RPLP2;RPL38;RPS2;RPL10A;EEF2
Response To Hydrogen Peroxide (GO:0042542)	4/40	0.0681755	0.59772	0	0	2.76472	7.42511	CLU;RELA;SOD1;NFE2L2
Proton Motive Force-Driven Mitochondrial ATP Synthesis (GO:0042776)	4/40	0.0681755	0.59772	0	0	2.76472	7.42511	NDUFB7;NDUFS5;NDUFA3;NDUFV3
Regulation Of Amide Metabolic Process (GO:0034248)	4/40	0.0681755	0.59772	0	0	2.76472	7.42511	RBM3;NOLC1;FOXO3;PUM3
Negative Regulation Of Protein Metabolic Process (GO:0051248)	9/131	0.0687273	0.600743	0	0	1.83973	4.92608	BAG6;PRNP;BTG2;DDX3X;IFRD2;SHMT1;CLU;CRYAB;GAPDH
Positive Regulation Of Autophagy (GO:0010508)	7/93	0.0693237	0.604136	0	0	2.02824	5.41331	GPSM1;FLCN;TBK1;HMGB1;FOXO3;SQSTM1;RNF152
Positive Regulation Of Multicellular Organismal Process (GO:0051240)	19/339	0.0698022	0.606485	0	0	1.48526	3.95388	CEBPB;ZBTB16;SERPINE1;NME2;PTPN11;ACTB;RTN4;TGFBR2;SOD1;PER2;NPPB;ING2;KAT2A;FABP4;GNAS;FLOT1;CTNNB1;PLA2R1;GAPDH
Positive Regulation Of Cytokine Production (GO:0001819)	15/254	0.0703757	0.609643	0	0	1.5682	4.16187	CEBPB;DDX3X;CD80;SERPINE1;PTPN11;HMGB1;RELA;HSPD1;SOD1;KAT2A;TBK1;DDIT3;FLOT1;PLA2R1;GAPDH
Regulation Of Extrinsic Apoptotic Signaling Pathway Via Death Domain Receptors (GO:1902041)	3/25	0.0709298	0.610796	0	0	3.39091	8.97257	DDX3X;SERPINE1;TMBIM1
Regulation Of DNA Damage Response, Signal Transduction By P53 Class Mediator (GO:0043516)	3/25	0.0709298	0.610796	0	0	3.39091	8.97257	DDX5;ANKRD1;PLA2R1
Proton Motive Force-Driven ATP Synthesis (GO:0015986)	4/41	0.073337	0.622204	0	0	2.68984	7.02771	NDUFB7;NDUFS5;NDUFA3;NDUFV3
Regulation Of Apoptotic Signaling Pathway (GO:2001233)	4/41	0.073337	0.622204	0	0	2.68984	7.02771	TRAF7;TMBIM1;PPIA;GRINA
Positive Regulation Of Cellular Catabolic Process (GO:0031331)	9/133	0.0740522	0.622204	0	0	1.80985	4.71101	FLCN;TBK1;PHKG2;IRS2;HMGB1;FOXO3;SQSTM1;RNF152;PNPLA2
Cellular Response To Lipopolysaccharide (GO:0071222)	7/95	0.0758249	0.622204	0	0	1.98191	5.112	ZFP36;CD80;SERPINE1;ANKRD1;HMGB1;RHOA;RELA
Cellular Response To Tumor Necrosis Factor (GO:0071356)	7/95	0.0758249	0.622204	0	0	1.98191	5.112	NFKBIA;EIF5A;ZFP36;ANKRD1;FOXO3;RELA;NFE2L2
Renal System Process Involved In Regulation Of Blood Volume (GO:0001977)	1/2	0.0760456	0.622204	0	0	24.8251	63.9601	EMP2
Regulation Of T Cell Tolerance Induction (GO:0002664)	1/2	0.0760456	0.622204	0	0	24.8251	63.9601	TGFBR2
Regulation Of Chromosome Separation (GO:1905818)	2/12	0.0766135	0.622204	0	0	4.96961	12.7668	SMC4;SMC2
Regulation Of Leukocyte Adhesion To Vascular Endothelial Cell (GO:1904994)	2/12	0.0766135	0.622204	0	0	4.96961	12.7668	RELA;RHOA
Regulation Of Retrograde Protein Transport, ER To Cytosol (GO:1904152)	2/12	0.0766135	0.622204	0	0	4.96961	12.7668	OS9;EDEM2
Endoderm Development (GO:0007492)	2/12	0.0766135	0.622204	0	0	4.96961	12.7668	DUSP5;DUSP1
Negative Regulation Of Translational Initiation (GO:0045947)	2/12	0.0766135	0.622204	0	0	4.96961	12.7668	EIF4EBP1;EIF4EBP3
Neuron Cell-Cell Adhesion (GO:0007158)	2/12	0.0766135	0.622204	0	0	4.96961	12.7668	NRXN2;ASTN2
Positive Regulation Of DNA Damage Response, Signal Transduction By P53 Class Mediator (GO:0043517)	2/12	0.0766135	0.622204	0	0	4.96961	12.7668	DDX5;PLA2R1
Positive Regulation Of Fatty Acid Oxidation (GO:0046321)	2/12	0.0766135	0.622204	0	0	4.96961	12.7668	NR4A3;IRS2
Positive Regulation Of Histone Deacetylation (GO:0031065)	2/12	0.0766135	0.622204	0	0	4.96961	12.7668	ING2;RRP8
Positive Regulation Of Nuclear-Transcribed mRNA poly(A) Tail Shortening (GO:0060213)	2/12	0.0766135	0.622204	0	0	4.96961	12.7668	BTG2;ZFP36
Positive Regulation Of Protein Deacetylation (GO:0090312)	2/12	0.0766135	0.622204	0	0	4.96961	12.7668	ING2;RRP8
Positive Regulation Of Ruffle Assembly (GO:1900029)	2/12	0.0766135	0.622204	0	0	4.96961	12.7668	EPS8L1;PFN1
Cellular Response To Epidermal Growth Factor Stimulus (GO:0071364)	3/26	0.077966	0.622204	0	0	3.24329	8.2752	ZFP36;PTPN11;ZPR1
Positive Regulation Of TORC1 Signaling (GO:1904263)	3/26	0.077966	0.622204	0	0	3.24329	8.2752	FLCN;PIP4P1;GPR137C
Positive Regulation Of Cholesterol Transport (GO:0032376)	3/26	0.077966	0.622204	0	0	3.24329	8.2752	NFKBIA;NR1H2;GPS2
Positive Regulation Of Glucose Transmembrane Transport (GO:0010828)	3/26	0.077966	0.622204	0	0	3.24329	8.2752	NR4A3;IRS2;PTPN11
Positive Regulation Of Mitotic Cell Cycle (GO:0045931)	3/26	0.077966	0.622204	0	0	3.24329	8.2752	SMOC2;USP2;EIF4EBP1
RNA Methylation (GO:0001510)	5/59	0.0780377	0.622204	0	0	2.30486	5.87868	FBL;MEPCE;LCMT2;SNRPF;FTSJ3
Cholesterol Metabolic Process (GO:0008203)	5/59	0.0780377	0.622204	0	0	2.30486	5.87868	STARD3;PIP4P1;OSBPL5;LCAT;MVD
Regulation Of Phosphorylation (GO:0042325)	6/77	0.0780435	0.622204	0	0	2.10456	5.36765	FLCN;LDB1;PTGES3;STAT2;PLXNB2;EMP2
Cellular Response To Starvation (GO:0009267)	8/115	0.0785396	0.623936	0	0	1.86348	4.74099	FLCN;GABARAPL1;MAP1LC3B;FOXO3;WDR45;RNF152;RRP8;SREBF2
Regulation Of Telomerase Activity (GO:0051972)	4/42	0.0786908	0.623936	0	0	2.6189	6.65784	HSP90AA1;PTGES3;CTNNB1;MAP2K7
Actin Filament Organization (GO:0007015)	9/135	0.0796245	0.62962	0	0	1.78091	4.50648	MYO1D;SCIN;ACTC1;INPPL1;CORO6;EMP2;RHOF;ALDOA;LMOD2
G1/S Transition Of Mitotic Cell Cycle (GO:0000082)	5/60	0.0825606	0.647543	0	0	2.26282	5.64397	CDK18;CCND3;CDK6;CDK2;EIF4EBP1
Regulation Of Translational Initiation (GO:0006446)	5/60	0.0825606	0.647543	0	0	2.26282	5.64397	EIF4A2;DDX3X;EIF4EBP1;EIF4EBP3;BZW1
Positive Regulation Of Mitotic Cell Cycle Phase Transition (GO:1901992)	5/60	0.0825606	0.647543	0	0	2.26282	5.64397	RAD51B;DDX3X;ADAMTS1;ANAPC5;TNFSF13B
Insulin Receptor Signaling Pathway (GO:0008286)	4/43	0.0842336	0.651577	0	0	2.5516	6.31307	SHC1;NAMPT;IRS2;PIK3R2
Positive Regulation Of Protein Import Into Nucleus (GO:0042307)	3/27	0.0852938	0.651577	0	0	3.10797	7.65075	TRIM28;PIK3R2;ZPR1
Positive Regulation Of Cellular Component Biogenesis (GO:0044089)	6/79	0.0859185	0.651577	0	0	2.04666	5.02323	HGS;CDK2;FLOT1;PFN1;CLU;SPIDR
Regulation Of Neuron Apoptotic Process (GO:0043523)	7/98	0.0862239	0.651577	0	0	1.91624	4.69633	PRNP;EGLN2;DDIT3;CTNNB1;FOXO3;CLU;SOD1
Cellular Response To Organonitrogen Compound (GO:0071417)	7/98	0.0862239	0.651577	0	0	1.91624	4.69633	RAP1B;CPEB1;SHMT1;CTNNB1;CLU;ACTB;RELA
Regulation Of Cholesterol Storage (GO:0010885)	2/13	0.0882873	0.651577	0	0	4.51756	10.9648	NR1H2;SREBF2
Regulation Of Feeding Behavior (GO:0060259)	2/13	0.0882873	0.651577	0	0	4.51756	10.9648	NR4A3;CFAP20
Branching Involved In Blood Vessel Morphogenesis (GO:0001569)	2/13	0.0882873	0.651577	0	0	4.51756	10.9648	CTNNB1;TGFBR2
Cellular Modified Amino Acid Catabolic Process (GO:0042219)	2/13	0.0882873	0.651577	0	0	4.51756	10.9648	ALDH4A1;PRODH
Regulation Of Systemic Arterial Blood Pressure (GO:0003073)	2/13	0.0882873	0.651577	0	0	4.51756	10.9648	NPPB;NPPA
Regulation Of Vasculogenesis (GO:2001212)	2/13	0.0882873	0.651577	0	0	4.51756	10.9648	TMEM100;EMP2
Response To Chemokine (GO:1990868)	2/13	0.0882873	0.651577	0	0	4.51756	10.9648	DUSP1;RHOA
Copper Ion Homeostasis (GO:0055070)	2/13	0.0882873	0.651577	0	0	4.51756	10.9648	COX19;PRNP
Reverse Cholesterol Transport (GO:0043691)	2/13	0.0882873	0.651577	0	0	4.51756	10.9648	LCAT;CLU
Endonucleolytic Cleavage Of Tricistronic rRNA Transcript (SSU-rRNA, 5.8S rRNA, LSU-rRNA) (GO:0000479)	2/13	0.0882873	0.651577	0	0	4.51756	10.9648	RRS1;SDE2
Formation Of Cytoplasmic Translation Initiation Complex (GO:0001732)	2/13	0.0882873	0.651577	0	0	4.51756	10.9648	EIF3L;EIF3G
Mitochondrial Fission (GO:0000266)	2/13	0.0882873	0.651577	0	0	4.51756	10.9648	MTFR1L;MTFR2
Myeloid Dendritic Cell Activation (GO:0001773)	2/13	0.0882873	0.651577	0	0	4.51756	10.9648	HMGB1;TGFBR2
Pathway-Restricted SMAD Protein Phosphorylation (GO:0060389)	2/13	0.0882873	0.651577	0	0	4.51756	10.9648	SMAD7;TGFBR2
Positive Regulation Of Chromosome Separation (GO:1905820)	2/13	0.0882873	0.651577	0	0	4.51756	10.9648	SMC4;SMC2
Positive Regulation Of Transcription From RNA Polymerase II Promoter Involved In Cellular Response To Chemical Stimulus (GO:1901522)	2/13	0.0882873	0.651577	0	0	4.51756	10.9648	RELA;NFE2L2
Cellular Response To Oxygen-Containing Compound (GO:1901701)	19/350	0.0886589	0.651577	0	0	1.43496	3.47685	JUN;SHMT1;CD80;SERPINE1;RORC;HMGB1;CLU;ACTB;RHOA;RELA;RAP1B;CPEB1;ZFP36;DLG2;NR4A3;CDK2;ANKRD1;SQSTM1;TGM2
Modification-Dependent Protein Catabolic Process (GO:0019941)	11/179	0.0890995	0.651577	0	0	1.63326	3.94922	BAG6;OS9;SIAH2;PSMD3;PSMC2;LONP1;SQSTM1;UBA52;FBXL7;HERPUD1;TNFSF13B
Regulation Of Cell Population Proliferation (GO:0042127)	33/666	0.0893681	0.651577	0	0	1.30703	3.15647	BTG2;SHC1;COX17;IRS2;TOB2;CLU;ACTB;RELA;GNAI2;SCIN;CAPNS1;DDRGK1;ADAMTS1;NAMPT;CHRNA10;IER5;TNS2;JUN;RPS9;JUND;STAT2;EMP2;VEGFD;PODN;RHOA;TGFBR2;CDK6;NR4A3;HGS;CDK2;CTNNB1;MVD;SLC25A33
Negative Regulation Of MAP Kinase Activity (GO:0043407)	4/44	0.0899619	0.651577	0	0	2.48766	5.99121	DNAJA1;DUSP1;NPPA;DUSP7
Regulation Of DNA Binding (GO:0051101)	4/44	0.0899619	0.651577	0	0	2.48766	5.99121	NFKBIA;JUN;SUMO3;HMGB1
Regulation Of Epithelial Cell Proliferation (GO:0050678)	6/80	0.0900142	0.651577	0	0	2.01888	4.86104	NR4A1;ZFP36;CDK6;NR4A3;NME2;SRSF6
Ribosomal Small Subunit Biogenesis (GO:0042274)	6/80	0.0900142	0.651577	0	0	2.01888	4.86104	NOP56;FBL;RPS9;RPS27;MPHOSPH10;RRP9
Positive Regulation Of Amide Metabolic Process (GO:0034250)	6/80	0.0900142	0.651577	0	0	2.01888	4.86104	RBM3;DDX3X;PLXNB2;EEF2;CLU;RELA
Negative Regulation Of Extrinsic Apoptotic Signaling Pathway (GO:2001237)	5/62	0.0920126	0.651577	0	0	2.18317	5.20866	DDX3X;SIAH2;SERPINE1;TMBIM1;RELA
Sarcomere Organization (GO:0045214)	3/28	0.0929019	0.651577	0	0	2.98348	7.08937	ANKRD1;MYOM2;LMOD2
Gluconeogenesis (GO:0006094)	3/28	0.0929019	0.651577	0	0	2.98348	7.08937	PER2;PGK1;CRY1
Glutamine Family Amino Acid Metabolic Process (GO:0009064)	3/28	0.0929019	0.651577	0	0	2.98348	7.08937	ALDH4A1;PRODH;GCLM
Intrinsic Apoptotic Signaling Pathway In Response To Endoplasmic Reticulum Stress (GO:0070059)	3/28	0.0929019	0.651577	0	0	2.98348	7.08937	BAG6;CEBPB;DDIT3
Lipid Droplet Organization (GO:0034389)	3/28	0.0929019	0.651577	0	0	2.98348	7.08937	PPIA;PPID;PNPLA2
Negative Regulation Of Carbohydrate Metabolic Process (GO:0045912)	3/28	0.0929019	0.651577	0	0	2.98348	7.08937	FLCN;KAT2A;CRY1
rRNA Processing (GO:0006364)	7/100	0.0935853	0.651577	0	0	1.87481	4.4412	NOP56;FBL;RPS27;SBDS;NOLC1;MPHOSPH10;RRP9
Myofibril Assembly (GO:0030239)	4/45	0.0958718	0.651577	0	0	2.42685	5.69033	MYL2;ANKRD1;MYOM2;LMOD2
Positive Regulation Of Fat Cell Differentiation (GO:0045600)	4/45	0.0958718	0.651577	0	0	2.42685	5.69033	ZFP36;CEBPB;NOCT;ZBTB16
Regulation Of Cell-Matrix Adhesion (GO:0001952)	5/63	0.0969385	0.651577	0	0	2.1454	5.00667	CDK6;LDB1;EMP2;RHOA;ACTG1
Cellular Response To Organic Cyclic Compound (GO:0071407)	9/141	0.0978276	0.651577	0	0	1.69936	3.95025	RAP1B;NR4A3;RORC;MSN;CTNNB1;CLU;SPIDR;ACTB;TGM2
Peptide Biosynthetic Process (GO:0043043)	9/141	0.0978276	0.651577	0	0	1.69936	3.95025	RPS9;RPS27;RPL21;EEF1A2;RPL36;RPLP2;RPL38;RPS2;RPL10A
Regulation Of Protein Phosphorylation (GO:0001932)	14/246	0.0984574	0.651577	0	0	1.50622	3.49162	SPTBN4;PRNP;HSP90AA1;STAT2;TWF1;VEGFD;SOD1;MOB3C;FLCN;CCND3;FKBP8;FLOT1;PLXNB2;PPIA
Cellular Response To Chemical Stress (GO:0062197)	6/82	0.0985176	0.651577	0	0	1.96553	4.55514	CHCHD2;DDX3X;LONP1;FOXO3;PPIA;NFE2L2
Regulation Of Nuclear-Transcribed mRNA poly(A) Tail Shortening (GO:0060211)	2/14	0.100445	0.651577	0	0	4.14086	9.51631	BTG2;ZFP36
Regulation Of Plasminogen Activation (GO:0010755)	2/14	0.100445	0.651577	0	0	4.14086	9.51631	PLGRKT;SERPINE1
cGMP-mediated Signaling (GO:0019934)	2/14	0.100445	0.651577	0	0	4.14086	9.51631	NPPB;NPPA
Regulation Of Secretion (GO:0051046)	2/14	0.100445	0.651577	0	0	4.14086	9.51631	SCIN;PTPRN
Cellular Response To Sterol (GO:0036315)	2/14	0.100445	0.651577	0	0	4.14086	9.51631	GRAMD1A;RORC
Contractile Actin Filament Bundle Assembly (GO:0030038)	2/14	0.100445	0.651577	0	0	4.14086	9.51631	PHACTR1;RHOA
Response To Muscle Stretch (GO:0035994)	2/14	0.100445	0.651577	0	0	4.14086	9.51631	NPPA;CTNNB1
Dendritic Cell Migration (GO:0036336)	2/14	0.100445	0.651577	0	0	4.14086	9.51631	HMGB1;CLU
Serine Family Amino Acid Metabolic Process (GO:0009069)	2/14	0.100445	0.651577	0	0	4.14086	9.51631	SHMT1;CTH
Endoplasmic Reticulum Tubular Network Organization (GO:0071786)	2/14	0.100445	0.651577	0	0	4.14086	9.51631	ZFYVE27;RTN4
Establishment Of Apical/Basal Cell Polarity (GO:0035089)	2/14	0.100445	0.651577	0	0	4.14086	9.51631	MSN;RHOA
Stress Fiber Assembly (GO:0043149)	2/14	0.100445	0.651577	0	0	4.14086	9.51631	PHACTR1;RHOA
Intracellular Estrogen Receptor Signaling Pathway (GO:0030520)	2/14	0.100445	0.651577	0	0	4.14086	9.51631	DDX5;EGLN2
Membrane Raft Organization (GO:0031579)	2/14	0.100445	0.651577	0	0	4.14086	9.51631	FLOT1;EMP2
Negative Regulation Of Gluconeogenesis (GO:0045721)	2/14	0.100445	0.651577	0	0	4.14086	9.51631	KAT2A;CRY1
Negative Regulation Of Insulin Secretion (GO:0046676)	2/14	0.100445	0.651577	0	0	4.14086	9.51631	MIDN;PIM3
Polarized Epithelial Cell Differentiation (GO:0030859)	2/14	0.100445	0.651577	0	0	4.14086	9.51631	MSN;RHOA
Prostanoid Biosynthetic Process (GO:0046457)	2/14	0.100445	0.651577	0	0	4.14086	9.51631	PTGES3;PTGDS
Protein Localization To Mitochondrion (GO:0070585)	2/14	0.100445	0.651577	0	0	4.14086	9.51631	DNAJA1;FKBP8
Regulation Of Amyloid Fibril Formation (GO:1905906)	2/14	0.100445	0.651577	0	0	4.14086	9.51631	CLU;CRYAB
Regulation Of Gluconeogenesis (GO:0006111)	3/29	0.100778	0.651577	0	0	2.86856	6.58286	KAT2A;CRY1;SIRT7
Response To Epidermal Growth Factor (GO:0070849)	3/29	0.100778	0.651577	0	0	2.86856	6.58286	ZFP36;PTPN11;ZPR1
Negative Regulation Of T Cell Proliferation (GO:0042130)	3/29	0.100778	0.651577	0	0	2.86856	6.58286	PRNP;CEBPB;CD80
Negative Regulation Of Small Molecule Metabolic Process (GO:0062014)	3/29	0.100778	0.651577	0	0	2.86856	6.58286	FLCN;KAT2A;CRY1
Positive Regulation Of Protein Targeting To Mitochondrion (GO:1903955)	3/29	0.100778	0.651577	0	0	2.86856	6.58286	HSPA1L;VPS11;SREBF2
Purine Nucleotide Metabolic Process (GO:0006163)	3/29	0.100778	0.651577	0	0	2.86856	6.58286	NOCT;IDH2;FHIT
Circulatory System Development (GO:0072359)	8/122	0.101857	0.651577	0	0	1.74834	3.99354	POPDC2;KAT2A;PDLIM3;TCF25;MYL2;TNNI3;PTPN11;TGFBR2
Cholesterol Transport (GO:0030301)	4/46	0.101959	0.651577	0	0	2.36893	5.40869	STARD3;OSBPL5;LCAT;CLU
Negative Regulation Of Response To Stimulus (GO:0048585)	4/46	0.101959	0.651577	0	0	2.36893	5.40869	BRAP;NR1H2;PIM3;CLU
Positive Regulation Of Interleukin-8 Production (GO:0032757)	4/46	0.101959	0.651577	0	0	2.36893	5.40869	DDIT3;SERPINE1;HMGB1;RELA
Positive Regulation Of Cell Differentiation (GO:0045597)	14/248	0.103331	0.651577	0	0	1.49317	3.38923	CEBPB;ZBTB16;TENT5A;ACTB;RHOA;MAPK12;TGFBR2;TMEM100;SLC6A6;ZFP36;NOCT;CTNNB1;LRRC8A;CCN2
Regulation Of Programmed Cell Death (GO:0043067)	10/164	0.105593	0.651577	0	0	1.61872	3.63915	HSP90AA1;PLSCR3;NME2;CCNL2;SLC39A7;CRYAB;CLU;ACTB;RTN4;TGM2
Regulation Of Interleukin-8 Production (GO:0032677)	5/65	0.10718	0.651577	0	0	2.07364	4.63095	ANXA4;DDIT3;SERPINE1;HMGB1;RELA
Negative Regulation Of Intracellular Signal Transduction (GO:1902532)	12/207	0.108252	0.651577	0	0	1.53485	3.41241	MAP2K3;DUSP5;PER1;FLCN;DDX3X;DUSP1;DDIT3;PIK3R2;DUSP8;RELA;HERPUD1;DUSP7
Skeletal Muscle Organ Development (GO:0060538)	3/30	0.108911	0.651577	0	0	2.76216	6.12432	POPDC2;MYL6;DES
Hexose Biosynthetic Process (GO:0019319)	3/30	0.108911	0.651577	0	0	2.76216	6.12432	PER2;PGK1;CRY1
Inner Mitochondrial Membrane Organization (GO:0007007)	3/30	0.108911	0.651577	0	0	2.76216	6.12432	HSPA9;GHITM;TIMM10
Interferon-Mediated Signaling Pathway (GO:0140888)	3/30	0.108911	0.651577	0	0	2.76216	6.12432	TBK1;STAT2;IFNAR1
Mitochondrial Membrane Organization (GO:0007006)	3/30	0.108911	0.651577	0	0	2.76216	6.12432	HSPA9;GHITM;SLC25A4
Negative Regulation Of Fat Cell Differentiation (GO:0045599)	3/30	0.108911	0.651577	0	0	2.76216	6.12432	FLCN;GPS2;RUNX1T1
Negative Regulation Of Proteasomal Ubiquitin-Dependent Protein Catabolic Process (GO:0032435)	3/30	0.108911	0.651577	0	0	2.76216	6.12432	BAG6;DDRGK1;FHIT
Regulation Of Renal Sodium Excretion (GO:0035813)	1/3	0.111875	0.651577	0	0	12.4118	27.1866	NPPB
Chitin Catabolic Process (GO:0006032)	1/3	0.111875	0.651577	0	0	12.4118	27.1866	OVGP1
Chitin Metabolic Process (GO:0006030)	1/3	0.111875	0.651577	0	0	12.4118	27.1866	OVGP1
Response To Catecholamine (GO:0071869)	1/3	0.111875	0.651577	0	0	12.4118	27.1866	NR4A3
Heterocycle Catabolic Process (GO:0046700)	1/3	0.111875	0.651577	0	0	12.4118	27.1866	PRODH
Oxygen Transport (GO:0015671)	1/3	0.111875	0.651577	0	0	12.4118	27.1866	MB
Positive Regulation Of T Cell Mediated Immune Response To Tumor Cell (GO:0002842)	1/3	0.111875	0.651577	0	0	12.4118	27.1866	HSPD1
Response To Tumor Necrosis Factor (GO:0034612)	6/85	0.112038	0.651577	0	0	1.89055	4.13826	NFKBIA;ZFP36;ANKRD1;MAP2K7;RELA;NFE2L2
Peptidyl-Lysine Modification (GO:0018205)	6/85	0.112038	0.651577	0	0	1.89055	4.13826	HINT1;HDAC10;TRIM28;SUMO3;CTH;ETFBKMT
Protein Tetramerization (GO:0051262)	5/66	0.112492	0.651577	0	0	2.03953	4.45611	SHMT1;CTH;AQP4;ALDOA;CLU
Negative Regulation Of Cellular Biosynthetic Process (GO:0031327)	8/125	0.112916	0.651577	0	0	1.70321	3.7149	BTG2;KAT2A;DDX3X;IFRD2;SHMT1;ANKRD1;CRY1;GAPDH
Regulation Of Cholesterol Biosynthetic Process (GO:0045540)	2/15	0.113031	0.651577	0	0	3.82211	8.33257	SREBF2;SOD1
Regulation Of Delayed Rectifier Potassium Channel Activity (GO:1902259)	2/15	0.113031	0.651577	0	0	3.82211	8.33257	RNF207;NPPA
N-terminal Protein Amino Acid Acetylation (GO:0006474)	2/15	0.113031	0.651577	0	0	3.82211	8.33257	NAA60;NAA80
Renal Absorption (GO:0070293)	2/15	0.113031	0.651577	0	0	3.82211	8.33257	SLC15A2;WNK4
Retrograde Axonal Transport (GO:0008090)	2/15	0.113031	0.651577	0	0	3.82211	8.33257	DLG2;SOD1
Endoplasmic Reticulum To Cytosol Transport (GO:1903513)	2/15	0.113031	0.651577	0	0	3.82211	8.33257	OS9;HERPUD1
Male Meiosis I (GO:0007141)	2/15	0.113031	0.651577	0	0	3.82211	8.33257	ING2;ZSCAN21
Mitotic Chromosome Condensation (GO:0007076)	2/15	0.113031	0.651577	0	0	3.82211	8.33257	SMC4;SMC2
Negative Regulation Of Release Of Cytochrome C From Mitochondria (GO:0090201)	2/15	0.113031	0.651577	0	0	3.82211	8.33257	GHITM;CLU
Nicotinamide Nucleotide Metabolic Process (GO:0046496)	2/15	0.113031	0.651577	0	0	3.82211	8.33257	NOCT;IDH2
Positive Regulation Of Amyloid-Beta Formation (GO:1902004)	2/15	0.113031	0.651577	0	0	3.82211	8.33257	CLU;RELA
Positive Regulation Of Glucose Metabolic Process (GO:0010907)	2/15	0.113031	0.651577	0	0	3.82211	8.33257	IRS2;SIRT7
Positive Regulation Of Monocyte Chemotaxis (GO:0090026)	2/15	0.113031	0.651577	0	0	3.82211	8.33257	SERPINE1;HMGB1
rRNA Transcription (GO:0009303)	2/15	0.113031	0.651577	0	0	3.82211	8.33257	POLR1E;SIRT7
Regulation Of DNA Methylation-Dependent Heterochromatin Formation (GO:0090308)	2/15	0.113031	0.651577	0	0	3.82211	8.33257	TRIM28;RESF1
Cytoplasmic Microtubule Organization (GO:0031122)	4/48	0.114648	0.651577	0	0	2.26098	4.89704	HOOK2;MBD1;CRIPT;RHOA
Cellular Response To Cytokine Stimulus (GO:0071345)	13/231	0.11534	0.651577	0	0	1.48749	3.2128	GBP6;DUSP1;SHMT1;AQP4;PTPN11;RHOA;RELA;NFKBIA;ZFP36;ANKRD1;GAPDH;IFNAR1;NFE2L2
Regulation Of Cellular Senescence (GO:2000772)	3/31	0.117288	0.651577	0	0	2.66335	5.70789	ING2;CDK6;YPEL3
Cardiac Muscle Contraction (GO:0060048)	3/31	0.117288	0.651577	0	0	2.66335	5.70789	MYL2;MYL3;TNNI3
Regulation Of Protein Polymerization (GO:0032271)	3/31	0.117288	0.651577	0	0	2.66335	5.70789	HSP90AA1;ARHGAP18;PFN1
Cellular Response To Hydrogen Peroxide (GO:0070301)	3/31	0.117288	0.651577	0	0	2.66335	5.70789	CLU;RELA;NFE2L2
Regulation Of Transcription By RNA Polymerase I (GO:0006356)	3/31	0.117288	0.651577	0	0	2.66335	5.70789	SIRT7;MAF1;SF3B1
Vasculogenesis (GO:0001570)	3/31	0.117288	0.651577	0	0	2.66335	5.70789	EGFL7;TNNI3;TGFBR2
Positive Regulation Of Establishment Of Protein Localization To Mitochondrion (GO:1903749)	3/31	0.117288	0.651577	0	0	2.66335	5.70789	HSPA1L;VPS11;SREBF2
Positive Regulation Of Telomere Maintenance Via Telomerase (GO:0032212)	3/31	0.117288	0.651577	0	0	2.66335	5.70789	CCT6A;CTNNB1;MAP2K7
Protein Destabilization (GO:0031648)	3/31	0.117288	0.651577	0	0	2.66335	5.70789	PRNP;RAD23A;SERF2
Gene Expression (GO:0010467)	15/276	0.119048	0.651577	0	0	1.43415	3.05221	RNASEL;RPS9;RPL21;RPL10A;HSPD1;GLE1;RBM3;RPS27;EEF1A2;RPL36;MPHOSPH10;RPLP2;RPL38;RPS2;TGM2
Cell Cycle G1/S Phase Transition (GO:0044843)	4/49	0.12124	0.651577	0	0	2.21061	4.66435	CCND3;CDK6;CDK2;EIF4EBP1
Endosome Organization (GO:0007032)	4/49	0.12124	0.651577	0	0	2.21061	4.66435	HOOK2;VPS11;ATP6V0C;SQSTM1
Plasma Membrane Organization (GO:0007009)	5/68	0.123486	0.651577	0	0	1.97455	4.13002	PLSCR3;CAVIN2;PLSCR4;FLOT1;TLCD1
Positive Regulation Of Protein Localization To Nucleus (GO:1900182)	5/68	0.123486	0.651577	0	0	1.97455	4.13002	CCT6A;TRIM28;MEPCE;PIK3R2;ZPR1
Blood Vessel Diameter Maintenance (GO:0097746)	3/32	0.125896	0.651577	0	0	2.57136	5.32863	NPPB;PER2;GCLM
Regulation Of Protein Tyrosine Kinase Activity (GO:0061097)	3/32	0.125896	0.651577	0	0	2.57136	5.32863	PRNP;SHC1;MVP
Negative Regulation Of Secretion By Cell (GO:1903531)	3/32	0.125896	0.651577	0	0	2.57136	5.32863	RHBDF1;IL1RAPL1;VAMP3
DNA Repair-Dependent Chromatin Remodeling (GO:0140861)	2/16	0.125994	0.651577	0	0	3.54889	7.35162	PHF1;SIRT7
Regulation Of Insulin-Like Growth Factor Receptor Signaling Pathway (GO:0043567)	2/16	0.125994	0.651577	0	0	3.54889	7.35162	ZFAND2B;INPPL1
acetyl-CoA Metabolic Process (GO:0006084)	2/16	0.125994	0.651577	0	0	3.54889	7.35162	MVD;HMGCS2
Actin Filament Capping (GO:0051693)	2/16	0.125994	0.651577	0	0	3.54889	7.35162	SCIN;TWF1
Regulation Of Mitochondrial Outer Membrane Permeabilization Involved In Apoptotic Signaling Pathway (GO:1901028)	2/16	0.125994	0.651577	0	0	3.54889	7.35162	CHCHD10;SLC25A4
Barbed-End Actin Filament Capping (GO:0051016)	2/16	0.125994	0.651577	0	0	3.54889	7.35162	SCIN;TWF1
Cellular Response To Alkaloid (GO:0071312)	2/16	0.125994	0.651577	0	0	3.54889	7.35162	SPIDR;TGM2
Cellular Response To Catecholamine Stimulus (GO:0071870)	2/16	0.125994	0.651577	0	0	3.54889	7.35162	NR4A3;TGM2
Response To Cholesterol (GO:0070723)	2/16	0.125994	0.651577	0	0	3.54889	7.35162	GRAMD1A;TGFBR2
Retrograde Protein Transport, ER To Cytosol (GO:0030970)	2/16	0.125994	0.651577	0	0	3.54889	7.35162	OS9;HERPUD1
Glycogen Metabolic Process (GO:0005977)	2/16	0.125994	0.651577	0	0	3.54889	7.35162	PER2;PHKG2
Glycoprotein Catabolic Process (GO:0006516)	2/16	0.125994	0.651577	0	0	3.54889	7.35162	EDEM2;OGA
Mitochondrial Cytochrome C Oxidase Assembly (GO:0033617)	2/16	0.125994	0.651577	0	0	3.54889	7.35162	COX19;COX17
Neuron Apoptotic Process (GO:0051402)	2/16	0.125994	0.651577	0	0	3.54889	7.35162	DIABLO;GAPDH
Nuclear Envelope Organization (GO:0006998)	2/16	0.125994	0.651577	0	0	3.54889	7.35162	DMPK;TOR1B
Nuclear Migration (GO:0007097)	2/16	0.125994	0.651577	0	0	3.54889	7.35162	MBD1;SYNE2
rRNA Modification (GO:0000154)	2/16	0.125994	0.651577	0	0	3.54889	7.35162	FBL;FTSJ3
Defense Response To Symbiont (GO:0140546)	7/108	0.12637	0.651577	0	0	1.7255	3.56927	RNASEL;TBK1;STAT2;TTC4;DDX60;SERINC3;RELA
NADH Dehydrogenase Complex Assembly (GO:0010257)	4/50	0.127991	0.651577	0	0	2.16243	4.44551	NDUFB7;NDUFS5;NDUFA3;TMEM126A
Blood Vessel Morphogenesis (GO:0048514)	4/50	0.127991	0.651577	0	0	2.16243	4.44551	EGFL7;TNNI3;TGFBR2;SMAD7
Sterol Metabolic Process (GO:0016125)	4/50	0.127991	0.651577	0	0	2.16243	4.44551	STARD3;PIP4P1;OSBPL5;LCAT
Mitochondrial Respiratory Chain Complex I Assembly (GO:0032981)	4/50	0.127991	0.651577	0	0	2.16243	4.44551	NDUFB7;NDUFS5;NDUFA3;TMEM126A
Mitochondrial Transport (GO:0006839)	4/50	0.127991	0.651577	0	0	2.16243	4.44551	STARD3;HSP90AA1;TIMM10;SLC25A4
Negative Regulation Of Protein-Containing Complex Assembly (GO:0031333)	4/50	0.127991	0.651577	0	0	2.16243	4.44551	DDX3X;HMGB1;CLU;CRYAB
Regulation Of Macroautophagy (GO:0016241)	6/89	0.131443	0.651577	0	0	1.79902	3.65054	GPSM1;TBK1;CAPNS1;ATP6V1E1;ATP6V0C;GAPDH
Positive Regulation Of Protein Kinase Activity (GO:0045860)	8/130	0.132724	0.651577	0	0	1.63293	3.29767	MAP2K3;PRNP;HSP90AA1;DDX3X;EMP2;CLU;RHOA;TGFBR2
Substantia Nigra Development (GO:0021762)	3/33	0.134723	0.651577	0	0	2.48551	4.98228	CHKB;RHOA;COX6B1
Nucleosome Assembly (GO:0006334)	3/33	0.134723	0.651577	0	0	2.48551	4.98228	BRD2;NAA60;SSRP1
Actin Cytoskeleton Reorganization (GO:0031532)	4/51	0.134895	0.651577	0	0	2.1163	4.23949	THSD7B;CDC42BPG;PHACTR1;RHOA
Regulation Of miRNA Transcription (GO:1902893)	4/51	0.134895	0.651577	0	0	2.1163	4.23949	DDX5;JUN;FOXO3;RELA
Endosome To Lysosome Transport (GO:0008333)	4/51	0.134895	0.651577	0	0	2.1163	4.23949	HOOK2;VPS11;UBXN6;VPS16
B Cell Activation (GO:0042113)	5/70	0.134957	0.651577	0	0	1.91357	3.8325	KLF6;GPS2;PIK3R2;SLC39A7;HSPD1
Cellular Response To Reactive Oxygen Species (GO:0034614)	5/70	0.134957	0.651577	0	0	1.91357	3.8325	JUN;CLU;SQSTM1;RELA;NFE2L2
Ubiquitin-Dependent ERAD Pathway (GO:0030433)	5/70	0.134957	0.651577	0	0	1.91357	3.8325	BAG6;OS9;UBXN10;EDEM2;HERPUD1
Supramolecular Fiber Organization (GO:0097435)	15/282	0.135094	0.651577	0	0	1.40143	2.80535	SIAH2;MBD1;CRIPT;INPPL1;EMP2;RHOF;RHOA;LMOD2;MYO1D;ADAMTS2;DES;HOOK2;CORO6;ALDOA;COLGALT1
Regulation Of Protein Secretion (GO:0050708)	6/90	0.13653	0.651577	0	0	1.7775	3.53937	RHBDF1;PER2;ANKRD1;PPIA;APBB3;PPID
Hemopoiesis (GO:0030097)	6/90	0.13653	0.651577	0	0	1.7775	3.53937	FLCN;CEBPB;ZBTB16;MKNK2;SBDS;TGFBR2
Ras Protein Signal Transduction (GO:0007265)	8/131	0.136886	0.651577	0	0	1.61956	3.22066	RAP1B;BRAP;RASGEF1B;CDK2;EPS8L1;RAPGEF5;RGL2;RHOA
Vesicle-Mediated Transport (GO:0016192)	19/373	0.137917	0.651577	0	0	1.3399	2.65447	NAPA;SPTBN4;RAB4B;AP5Z1;STXBP2;INPPL1;CSNK1E;RHOBTB1;CYTH2;ZFYVE27;EHD4;AP1G2;HOOK2;HGS;AP1S2;VPS11;SQSTM1;VPS16;VAMP3
Regulation Of Early Endosome To Late Endosome Transport (GO:2000641)	2/17	0.139286	0.651577	0	0	3.31211	6.52891	VPS11;MSN
NAD Biosynthetic Process (GO:0009435)	2/17	0.139286	0.651577	0	0	3.31211	6.52891	PARP10;NAMPT
NADP Metabolic Process (GO:0006739)	2/17	0.139286	0.651577	0	0	3.31211	6.52891	NOCT;IDH2
RNA-templated DNA Biosynthetic Process (GO:0006278)	2/17	0.139286	0.651577	0	0	3.31211	6.52891	HSP90AA1;PTGES3
Regulation Of Regulatory T Cell Differentiation (GO:0045589)	2/17	0.139286	0.651577	0	0	3.31211	6.52891	KAT2A;FOXO3
Cellular Response To Inorganic Substance (GO:0071241)	2/17	0.139286	0.651577	0	0	3.31211	6.52891	CDK2;SPIDR
Regulation Of Viral Transcription (GO:0046782)	2/17	0.139286	0.651577	0	0	3.31211	6.52891	ZFP36;TARBP2
Excitatory Postsynaptic Potential (GO:0060079)	2/17	0.139286	0.651577	0	0	3.31211	6.52891	NPFF;GRIN2D
Telomere Maintenance Via Telomerase (GO:0007004)	2/17	0.139286	0.651577	0	0	3.31211	6.52891	HSP90AA1;PTGES3
mRNA Cis Splicing, Via Spliceosome (GO:0045292)	2/17	0.139286	0.651577	0	0	3.31211	6.52891	SRSF1;SDE2
Negative Regulation Of Interleukin-2 Production (GO:0032703)	2/17	0.139286	0.651577	0	0	3.31211	6.52891	PRNP;ZFP36
Peptide Cross-Linking (GO:0018149)	2/17	0.139286	0.651577	0	0	3.31211	6.52891	TGM7;TGM2
Peptidyl-Threonine Dephosphorylation (GO:0035970)	2/17	0.139286	0.651577	0	0	3.31211	6.52891	DUSP5;DUSP18
Positive Regulation Of Fatty Acid Metabolic Process (GO:0045923)	2/17	0.139286	0.651577	0	0	3.31211	6.52891	NR4A3;NR1H2
Positive Regulation Of Leukocyte Adhesion To Vascular Endothelial Cell (GO:1904996)	2/17	0.139286	0.651577	0	0	3.31211	6.52891	RELA;RHOA
Regulation Of Cytokine Production (GO:0001817)	8/132	0.141114	0.651577	0	0	1.6064	3.14564	PER1;KAT2A;TBK1;FLOT1;PLA2R1;GAPDH;SOD1;ASB1
Negative Regulation Of Macromolecule Biosynthetic Process (GO:0010558)	6/91	0.141709	0.651577	0	0	1.75649	3.43214	BTG2;DDX3X;IFRD2;SHMT1;ANKRD1;GAPDH
B Cell Differentiation (GO:0030183)	4/52	0.141947	0.651577	0	0	2.07209	4.04534	KLF6;GPS2;PIK3R2;SLC39A7
Selective Autophagy (GO:0061912)	4/52	0.141947	0.651577	0	0	2.07209	4.04534	MAP1LC3B;DDRGK1;ARFIP2;SQSTM1
Glucose Metabolic Process (GO:0006006)	4/52	0.141947	0.651577	0	0	2.07209	4.04534	PER2;CRY1;PGK1;IRS2
RNA Transport (GO:0050658)	3/34	0.143756	0.651577	0	0	2.40519	4.66519	ZFP36;FLOT1;TGFBR2
Regulation Of Intracellular Protein Transport (GO:0033157)	3/34	0.143756	0.651577	0	0	2.40519	4.66519	MBD1;SIRT7;OAZ1
Regulation Of Metal Ion Transport (GO:0010959)	3/34	0.143756	0.651577	0	0	2.40519	4.66519	NKAIN2;SPTBN4;PER1
Aortic Valve Morphogenesis (GO:0003180)	3/34	0.143756	0.651577	0	0	2.40519	4.66519	NPPA;RHOA;TGFBR2
Histone H3 Acetylation (GO:0043966)	3/34	0.143756	0.651577	0	0	2.40519	4.66519	NAA60;KAT2A;LDB1
Negative Regulation Of Proteasomal Protein Catabolic Process (GO:1901799)	3/34	0.143756	0.651577	0	0	2.40519	4.66519	BAG6;DDRGK1;FHIT
Positive Regulation Of Catalytic Activity (GO:0043085)	3/34	0.143756	0.651577	0	0	2.40519	4.66519	APH1A;FDX2;SOD1
Positive Regulation Of Intrinsic Apoptotic Signaling Pathway (GO:2001244)	3/34	0.143756	0.651577	0	0	2.40519	4.66519	EIF5A;DDIT3;SOD1
Positive Regulation Of Telomere Maintenance Via Telomere Lengthening (GO:1904358)	3/34	0.143756	0.651577	0	0	2.40519	4.66519	CCT6A;CTNNB1;MAP2K7
Membrane Organization (GO:0061024)	9/154	0.144743	0.651577	0	0	1.54583	2.98777	NAPA;SH3GLB2;SYNGR2;SAR1A;DMPK;HGS;TLCD1;TOR1B;VAMP3
T Cell Mediated Cytotoxicity (GO:0001913)	1/4	0.146316	0.651577	0	0	8.27408	15.9027	EMP2
acetyl-CoA Biosynthetic Process From Pyruvate (GO:0006086)	1/4	0.146316	0.651577	0	0	8.27408	15.9027	PDHB
Adenylate Cyclase-Activating Dopamine Receptor Signaling Pathway (GO:0007191)	1/4	0.146316	0.651577	0	0	8.27408	15.9027	GNAS
Regulation Of Morphogenesis Of A Branching Structure (GO:0060688)	1/4	0.146316	0.651577	0	0	8.27408	15.9027	RTN4
Regulation Of Phospholipase A2 Activity (GO:0032429)	1/4	0.146316	0.651577	0	0	8.27408	15.9027	PLA2R1
Cellular Response To Potassium Ion (GO:0035865)	1/4	0.146316	0.651577	0	0	8.27408	15.9027	DLG2
Dermatan Sulfate Metabolic Process (GO:0030205)	1/4	0.146316	0.651577	0	0	8.27408	15.9027	UST
Response To Peptidoglycan (GO:0032494)	1/4	0.146316	0.651577	0	0	8.27408	15.9027	RELA
Response To Potassium Ion (GO:0035864)	1/4	0.146316	0.651577	0	0	8.27408	15.9027	DLG2
Detection Of Virus (GO:0009597)	1/4	0.146316	0.651577	0	0	8.27408	15.9027	SERINC3
Monosaccharide Biosynthetic Process (GO:0046364)	1/4	0.146316	0.651577	0	0	8.27408	15.9027	UST
Negative Regulation Of B Cell Receptor Signaling Pathway (GO:0050859)	1/4	0.146316	0.651577	0	0	8.27408	15.9027	GPS2
Negative Regulation Of T Cell Cytokine Production (GO:0002725)	1/4	0.146316	0.651577	0	0	8.27408	15.9027	SMAD7
Negative Regulation Of Epidermal Cell Differentiation (GO:0045605)	1/4	0.146316	0.651577	0	0	8.27408	15.9027	SRSF6
Nucleotide-Binding Oligomerization Domain Containing 2 Signaling Pathway (GO:0070431)	1/4	0.146316	0.651577	0	0	8.27408	15.9027	RELA
Photoreceptor Cell Differentiation (GO:0046530)	1/4	0.146316	0.651577	0	0	8.27408	15.9027	RP1
Positive Regulation Of Icosanoid Secretion (GO:0032305)	1/4	0.146316	0.651577	0	0	8.27408	15.9027	PLA2R1
Positive Regulation Of Immune Response To Tumor Cell (GO:0002839)	1/4	0.146316	0.651577	0	0	8.27408	15.9027	HSPD1
Positive Regulation Of Mitophagy (GO:1901526)	1/4	0.146316	0.651577	0	0	8.27408	15.9027	SLC25A4
Positive Regulation Of Sterol Transport (GO:0032373)	1/4	0.146316	0.651577	0	0	8.27408	15.9027	NR1H2
Positive Regulation Of Urine Volume (GO:0035810)	1/4	0.146316	0.651577	0	0	8.27408	15.9027	NPPB
Protein Targeting To Vacuole Involved In Autophagy (GO:0071211)	1/4	0.146316	0.651577	0	0	8.27408	15.9027	SQSTM1
Negative Regulation Of Cell Cycle (GO:0045786)	5/72	0.146882	0.651577	0	0	1.85623	3.56049	NR4A1;BTG2;CDK6;DUSP1;RRP8
Regulation Of Macromolecule Biosynthetic Process (GO:0010556)	4/53	0.149141	0.651577	0	0	2.02968	3.8622	RBM3;NOLC1;FOXO3;PUM3
Mitotic DNA Damage Checkpoint Signaling (GO:0044773)	4/53	0.149141	0.651577	0	0	2.02968	3.8622	CDK2;SDE2;TNFSF13B;FBXO31
protein-DNA Complex Organization (GO:0071824)	4/53	0.149141	0.651577	0	0	2.02968	3.8622	PARP10;HDAC10;TRIM28;PHF1
Organelle Assembly (GO:0070925)	15/288	0.152299	0.651577	0	0	1.37014	2.57848	GABARAPL1;MBD1;HPS1;CEP164;RFX2;WDR45;MAP1LC3B;EHD4;ARL13B;HGS;UBXN10;TCTN2;TCTN1;AP1S2;CFAP20
Cellular Response To Insulin Stimulus (GO:0032869)	6/93	0.152332	0.651577	0	0	1.71591	3.22881	CPEB1;SHC1;NAMPT;IRS2;PIK3R2;SLC25A33
Regulation Of Histone Modification (GO:0031056)	2/18	0.152863	0.651577	0	0	3.10492	5.83171	FLCN;KAT2A
T-helper Cell Differentiation (GO:0042093)	2/18	0.152863	0.651577	0	0	3.10492	5.83171	RORC;HMGB1
Actin Nucleation (GO:0045010)	2/18	0.152863	0.651577	0	0	3.10492	5.83171	SCIN;LMOD2
Regulation Of Transcription Involved In G1/S Transition Of Mitotic Cell Cycle (GO:0000083)	2/18	0.152863	0.651577	0	0	3.10492	5.83171	CDK18;ZPR1
Cyclic Nucleotide Biosynthetic Process (GO:0009190)	2/18	0.152863	0.651577	0	0	3.10492	5.83171	NPPB;NPPA
Stress-Activated Protein Kinase Signaling Cascade (GO:0031098)	2/18	0.152863	0.651577	0	0	3.10492	5.83171	MAP2K3;MAP2K7
Melanosome Assembly (GO:1903232)	2/18	0.152863	0.651577	0	0	3.10492	5.83171	HPS1;AP1S2
Myoblast Differentiation (GO:0045445)	2/18	0.152863	0.651577	0	0	3.10492	5.83171	DDX5;MAPK12
Negative Regulation Of Antigen Receptor-Mediated Signaling Pathway (GO:0050858)	2/18	0.152863	0.651577	0	0	3.10492	5.83171	PRNP;GPS2
Positive Regulation Of Chromosome Segregation (GO:0051984)	2/18	0.152863	0.651577	0	0	3.10492	5.83171	SMC4;SMC2
Positive Regulation Of mRNA Splicing, Via Spliceosome (GO:0048026)	2/18	0.152863	0.651577	0	0	3.10492	5.83171	RBM3;PRMT5
Positive Regulation Of Response To Endoplasmic Reticulum Stress (GO:1905898)	2/18	0.152863	0.651577	0	0	3.10492	5.83171	BAG6;DDIT3
Positive Regulation Of Triglyceride Metabolic Process (GO:0090208)	2/18	0.152863	0.651577	0	0	3.10492	5.83171	NR1H2;PNPLA2
Purine Ribonucleotide Transport (GO:0015868)	2/18	0.152863	0.651577	0	0	3.10492	5.83171	LRRC8A;SLC25A4
rRNA Methylation (GO:0031167)	2/18	0.152863	0.651577	0	0	3.10492	5.83171	FBL;FTSJ3
Regulation Of Actin Nucleation (GO:0051125)	2/18	0.152863	0.651577	0	0	3.10492	5.83171	SCIN;ARFIP2
RNA Stabilization (GO:0043489)	3/35	0.152983	0.651577	0	0	2.32989	4.37421	NOCT;PHAX;TENT5A
Regulation Of Ossification (GO:0030278)	3/35	0.152983	0.651577	0	0	2.32989	4.37421	ZBTB16;PTPN11;TENT5A
Regulation Of p38MAPK Cascade (GO:1900744)	3/35	0.152983	0.651577	0	0	2.32989	4.37421	PER1;GADD45B;DUSP1
Response To Transforming Growth Factor Beta (GO:0071559)	3/35	0.152983	0.651577	0	0	2.32989	4.37421	WWOX;ANKRD1;SMAD7
Endothelial Cell Migration (GO:0043542)	3/35	0.152983	0.651577	0	0	2.32989	4.37421	NR4A1;EMP2;RHOA
Negative Regulation Of Organelle Assembly (GO:1902116)	3/35	0.152983	0.651577	0	0	2.32989	4.37421	TCHP;KAT2A;PHF23
Positive Regulation Of Cell Cycle G1/S Phase Transition (GO:1902808)	3/35	0.152983	0.651577	0	0	2.32989	4.37421	DDX3X;ADAMTS1;DDRGK1
Lymphocyte Differentiation (GO:0030098)	5/73	0.153008	0.651577	0	0	1.82883	3.4332	LMBR1L;KLF6;GPS2;PIK3R2;SLC39A7
Negative Regulation Of NF-kappaB Transcription Factor Activity (GO:0032088)	5/73	0.153008	0.651577	0	0	1.82883	3.4332	NFKBIA;PARP10;SETD6;ANXA4;DDIT3
Positive Regulation Of Cysteine-Type Endopeptidase Activity Involved In Apoptotic Process (GO:0043280)	6/94	0.157773	0.651577	0	0	1.69631	3.1324	DDX3X;DIABLO;HMGB1;HSPE1;CTSD;HSPD1
Regulation Of Kinase Activity (GO:0043549)	5/74	0.159238	0.651577	0	0	1.80222	3.31132	LDB1;IRS2;EMP2;MERTK;SOD1
Regulation Of Protein Import Into Nucleus (GO:0042306)	3/36	0.16239	0.651577	0	0	2.25916	4.1066	TRIM28;PIK3R2;ZPR1
Regulation Of Protein Targeting To Mitochondrion (GO:1903214)	3/36	0.16239	0.651577	0	0	2.25916	4.1066	HSPA1L;VPS11;SREBF2
Stem Cell Differentiation (GO:0048863)	3/36	0.16239	0.651577	0	0	2.25916	4.1066	LMBR1L;SETD6;CTNNB1
Import Into Cell (GO:0098657)	3/36	0.16239	0.651577	0	0	2.25916	4.1066	SLC5A6;SLC6A6;LRRC8A
Positive Regulation Of Signaling (GO:0023056)	3/36	0.16239	0.651577	0	0	2.25916	4.1066	CLSTN2;CD80;VAMP3
Regulation Of Neuron Death (GO:1901214)	4/55	0.163934	0.651577	0	0	1.94986	3.5259	PRNP;TBK1;EGLN2;CLU
Autophagosome Assembly (GO:0000045)	4/55	0.163934	0.651577	0	0	1.94986	3.5259	MAP1LC3B;GABARAPL1;ARFIP2;WDR45
Regulation Of Type I Interferon Production (GO:0032479)	4/55	0.163934	0.651577	0	0	1.94986	3.5259	DDX3X;TBK1;PTPN11;GAPDH
Response To Light Stimulus (GO:0009416)	4/55	0.163934	0.651577	0	0	1.94986	3.5259	CRY2;CRY1;MAP2K7;TNFSF13B
Actin Filament-Based Transport (GO:0099515)	2/19	0.166681	0.651577	0	0	2.92211	5.23546	MYO1D;SYNE2
Adenine Nucleotide Transport (GO:0051503)	2/19	0.166681	0.651577	0	0	2.92211	5.23546	LRRC8A;SLC25A4
Calcium-Mediated Signaling Using Intracellular Calcium Source (GO:0035584)	2/19	0.166681	0.651577	0	0	2.92211	5.23546	PRNP;CLU
Response To Fibroblast Growth Factor (GO:0071774)	2/19	0.166681	0.651577	0	0	2.92211	5.23546	NR4A1;ZFP36
Establishment Of Epithelial Cell Polarity (GO:0090162)	2/19	0.166681	0.651577	0	0	2.92211	5.23546	MSN;RHOA
Glutamate Metabolic Process (GO:0006536)	2/19	0.166681	0.651577	0	0	2.92211	5.23546	GCLM;PRODH
Long-Chain Fatty Acid Biosynthetic Process (GO:0042759)	2/19	0.166681	0.651577	0	0	2.92211	5.23546	GSTM1;GPX4
Mitochondrial RNA Metabolic Process (GO:0000959)	2/19	0.166681	0.651577	0	0	2.92211	5.23546	FOXO3;SLC25A33
Phosphatidylcholine Biosynthetic Process (GO:0006656)	2/19	0.166681	0.651577	0	0	2.92211	5.23546	CHKB;LCAT
Positive Regulation Of Amyloid Precursor Protein Catabolic Process (GO:1902993)	2/19	0.166681	0.651577	0	0	2.92211	5.23546	CLU;RELA
Positive Regulation Of Histone Methylation (GO:0031062)	2/19	0.166681	0.651577	0	0	2.92211	5.23546	CTNNB1;RRP8
Positive Regulation Of Vascular Associated Smooth Muscle Cell Proliferation (GO:1904707)	2/19	0.166681	0.651577	0	0	2.92211	5.23546	JUN;NR4A3
Regulation Of Autophagy Of Mitochondrion (GO:1903146)	2/19	0.166681	0.651577	0	0	2.92211	5.23546	FKBP8;SREBF2
Regulation Of Cardiac Muscle Contraction By Calcium Ion Signaling (GO:0010882)	2/19	0.166681	0.651577	0	0	2.92211	5.23546	GSTO1;TNNI3
Protein Homooligomerization (GO:0051260)	7/117	0.169213	0.651577	0	0	1.58349	2.81322	EHD4;SHMT1;TMEM120A;CTH;AQP4;ALDOA;CLU
Negative Regulation Of Kinase Activity (GO:0033673)	4/56	0.171522	0.651577	0	0	1.91225	3.37138	CAMK2N1;IRS2;PPIA;TARBP2
Positive Regulation Of DNA-templated Transcription Initiation (GO:2000144)	4/56	0.171522	0.651577	0	0	1.91225	3.37138	MED12;JUN;TAF13;MED20
Regulation Of Receptor-Mediated Endocytosis (GO:0048259)	3/37	0.171965	0.651577	0	0	2.19258	3.85997	SERPINE1;FLOT1;CLU
Negative Regulation Of Protein Localization (GO:1903828)	3/37	0.171965	0.651577	0	0	2.19258	3.85997	BTF3;FLCN;ANKRD13A
Negative Regulation Of Ubiquitin-Dependent Protein Catabolic Process (GO:2000059)	3/37	0.171965	0.651577	0	0	2.19258	3.85997	BAG6;DDRGK1;FHIT
Regulation Of MAPK Cascade (GO:0043408)	10/183	0.174316	0.651577	0	0	1.43933	2.51435	DUSP5;TRAF7;DUSP1;SHC1;PIK3R2;HMGB1;DUSP8;PPIA;DUSP7;SOD1
Chromatin Organization (GO:0006325)	12/228	0.176427	0.651577	0	0	1.38391	2.40087	PARP10;PER2;NAA60;BRD2;PER1;KAT2A;PHC1;HDAC10;TRIM28;PHF1;SSRP1;SF3B1
Positive Regulation Of Macromolecule Metabolic Process (GO:0010604)	16/319	0.177438	0.651577	0	0	1.31639	2.27621	DDX3X;NR1H2;MSN;CLU;RELA;ACTG1;NFKBIA;ACTC1;HGS;DDRGK1;DNAJA4;RNF207;VAMP3;NFE2L2;RBMS3;ZPR1
DNA-templated Transcription (GO:0006351)	10/184	0.178418	0.651577	0	0	1.43098	2.46647	DRAP1;PRMT5;DDX5;KLF13;TAF13;NOCT;MED20;FOXO3;SLC25A33;IRF9
Regulation Of Angiogenesis (GO:0045765)	10/184	0.178418	0.651577	0	0	1.43098	2.46647	NPPB;SMOC2;HSPB6;HGS;ADAMTS1;SERPINE1;PGK1;CTNNB1;EMP2;VEGFD
Memory (GO:0007613)	4/57	0.179229	0.651577	0	0	1.87606	3.22511	PRNP;KAT2A;CAMK2N1;CIC
7-Methylguanosine RNA Capping (GO:0009452)	1/5	0.179424	0.651577	0	0	6.2052	10.6606	RAMAC
7-Methylguanosine mRNA Capping (GO:0006370)	1/5	0.179424	0.651577	0	0	6.2052	10.6606	RAMAC
ATP Synthesis Coupled Electron Transport (GO:0042773)	1/5	0.179424	0.651577	0	0	6.2052	10.6606	NDUFV3
CD4-positive, Alpha-Beta T Cell Activation (GO:0035710)	1/5	0.179424	0.651577	0	0	6.2052	10.6606	HMGB1
Regulation Of Collagen Fibril Organization (GO:1904026)	1/5	0.179424	0.651577	0	0	6.2052	10.6606	COLGALT1
Regulation Of Dendritic Cell Differentiation (GO:2001198)	1/5	0.179424	0.651577	0	0	6.2052	10.6606	HMGB1
Regulation Of Fat Cell Proliferation (GO:0070344)	1/5	0.179424	0.651577	0	0	6.2052	10.6606	PER2
Regulation Of Glutamate Receptor Signaling Pathway (GO:1900449)	1/5	0.179424	0.651577	0	0	6.2052	10.6606	PRNP
R-loop Processing (GO:0062176)	1/5	0.179424	0.651577	0	0	6.2052	10.6606	SIRT7
T Cell Apoptotic Process (GO:0070231)	1/5	0.179424	0.651577	0	0	6.2052	10.6606	LMBR1L
Regulation Of Keratinocyte Apoptotic Process (GO:1902172)	1/5	0.179424	0.651577	0	0	6.2052	10.6606	ZFP36
Activation Of Cysteine-Type Endopeptidase Activity Involved In Apoptotic Process By Cytochrome C (GO:0008635)	1/5	0.179424	0.651577	0	0	6.2052	10.6606	DIABLO
Regulation Of Long-Chain Fatty Acid Import Across Plasma Membrane (GO:0010746)	1/5	0.179424	0.651577	0	0	6.2052	10.6606	IRS2
Aggrephagy (GO:0035973)	1/5	0.179424	0.651577	0	0	6.2052	10.6606	SQSTM1
Regulation Of Mammary Gland Epithelial Cell Proliferation (GO:0033599)	1/5	0.179424	0.651577	0	0	6.2052	10.6606	RTN4
Regulation Of Mast Cell Chemotaxis (GO:0060753)	1/5	0.179424	0.651577	0	0	6.2052	10.6606	VEGFD
Regulation Of Metallopeptidase Activity (GO:1905048)	1/5	0.179424	0.651577	0	0	6.2052	10.6606	DDRGK1
Regulation Of Mitophagy (GO:1901524)	1/5	0.179424	0.651577	0	0	6.2052	10.6606	SLC25A4
Regulation Of Mitotic Spindle Checkpoint (GO:1903504)	1/5	0.179424	0.651577	0	0	6.2052	10.6606	DUSP1
Auditory Behavior (GO:0031223)	1/5	0.179424	0.651577	0	0	6.2052	10.6606	NRXN2
Bleb Assembly (GO:0032060)	1/5	0.179424	0.651577	0	0	6.2052	10.6606	EMP2
Regulation Of Potassium Ion Export Across Plasma Membrane (GO:1903764)	1/5	0.179424	0.651577	0	0	6.2052	10.6606	NPPA
Cell-Cell Signaling Involved In Cardiac Conduction (GO:0086019)	1/5	0.179424	0.651577	0	0	6.2052	10.6606	RNF207
Cellular Response To Cold (GO:0070417)	1/5	0.179424	0.651577	0	0	6.2052	10.6606	NFKBIA
Regulation Of Striated Muscle Tissue Development (GO:0016202)	1/5	0.179424	0.651577	0	0	6.2052	10.6606	CENPF
Cellular Response To Granulocyte Macrophage Colony-Stimulating Factor Stimulus (GO:0097011)	1/5	0.179424	0.651577	0	0	6.2052	10.6606	ZFP36
Regulation Of System Process (GO:0044057)	1/5	0.179424	0.651577	0	0	6.2052	10.6606	MTG1
Cellular Response To Lipoteichoic Acid (GO:0071223)	1/5	0.179424	0.651577	0	0	6.2052	10.6606	RELA
Regulation Of Urine Volume (GO:0035809)	1/5	0.179424	0.651577	0	0	6.2052	10.6606	NPPB
Regulation Of Ventricular Cardiac Muscle Cell Membrane Depolarization (GO:0060373)	1/5	0.179424	0.651577	0	0	6.2052	10.6606	SMAD7
Response To Angiotensin (GO:1990776)	1/5	0.179424	0.651577	0	0	6.2052	10.6606	RELA
Response To Cocaine (GO:0042220)	1/5	0.179424	0.651577	0	0	6.2052	10.6606	TGM2
Response To Granulocyte Macrophage Colony-Stimulating Factor (GO:0097012)	1/5	0.179424	0.651577	0	0	6.2052	10.6606	ZFP36
Response To Lipoteichoic Acid (GO:0070391)	1/5	0.179424	0.651577	0	0	6.2052	10.6606	RELA
Dendrite Arborization (GO:0140059)	1/5	0.179424	0.651577	0	0	6.2052	10.6606	PHACTR1
Dendrite Extension (GO:0097484)	1/5	0.179424	0.651577	0	0	6.2052	10.6606	LLPH
Response To Testosterone (GO:0033574)	1/5	0.179424	0.651577	0	0	6.2052	10.6606	MSN
Skeletal Muscle Thin Filament Assembly (GO:0030240)	1/5	0.179424	0.651577	0	0	6.2052	10.6606	ACTC1
snRNA Modification (GO:0040031)	1/5	0.179424	0.651577	0	0	6.2052	10.6606	MEPCE
Glucosamine-Containing Compound Catabolic Process (GO:1901072)	1/5	0.179424	0.651577	0	0	6.2052	10.6606	OVGP1
Glycerol-3-Phosphate Metabolic Process (GO:0006072)	1/5	0.179424	0.651577	0	0	6.2052	10.6606	GK5
Unsaturated Fatty Acid Biosynthetic Process (GO:0006636)	1/5	0.179424	0.651577	0	0	6.2052	10.6606	FADS3
Vocal Learning (GO:0042297)	1/5	0.179424	0.651577	0	0	6.2052	10.6606	NRXN2
Histone Arginine Methylation (GO:0034969)	1/5	0.179424	0.651577	0	0	6.2052	10.6606	PRMT5
Hydrogen Peroxide Biosynthetic Process (GO:0050665)	1/5	0.179424	0.651577	0	0	6.2052	10.6606	SOD1
Imitative Learning (GO:0098596)	1/5	0.179424	0.651577	0	0	6.2052	10.6606	NRXN2
Immunoglobulin Production Involved In Immunoglobulin-Mediated Immune Response (GO:0002381)	1/5	0.179424	0.651577	0	0	6.2052	10.6606	SHLD1
Intracellular Triglyceride Homeostasis (GO:0035356)	1/5	0.179424	0.651577	0	0	6.2052	10.6606	DGAT2
Intracellular Water Homeostasis (GO:0009992)	1/5	0.179424	0.651577	0	0	6.2052	10.6606	AQP4
Learned Vocalization Behavior Or Vocal Learning (GO:0098598)	1/5	0.179424	0.651577	0	0	6.2052	10.6606	NRXN2
Lipid Droplet Disassembly (GO:1905691)	1/5	0.179424	0.651577	0	0	6.2052	10.6606	PNPLA2
Lipoprotein Metabolic Process (GO:0042157)	1/5	0.179424	0.651577	0	0	6.2052	10.6606	CTSD
Lipoxygenase Pathway (GO:0019372)	1/5	0.179424	0.651577	0	0	6.2052	10.6606	GPX4
Lymphocyte Apoptotic Process (GO:0070227)	1/5	0.179424	0.651577	0	0	6.2052	10.6606	LMBR1L
mRNA 5'-Splice Site Recognition (GO:0000395)	1/5	0.179424	0.651577	0	0	6.2052	10.6606	SRSF1
Membrane Invagination (GO:0010324)	1/5	0.179424	0.651577	0	0	6.2052	10.6606	HGS
Monoacylglycerol Biosynthetic Process (GO:0006640)	1/5	0.179424	0.651577	0	0	6.2052	10.6606	DGAT2
Morphogenesis Of An Endothelium (GO:0003159)	1/5	0.179424	0.651577	0	0	6.2052	10.6606	CTNNB1
Negative Regulation Of Actin Filament Depolymerization (GO:0030835)	1/5	0.179424	0.651577	0	0	6.2052	10.6606	SCIN
Negative Regulation Of Amyloid Precursor Protein Biosynthetic Process (GO:0042985)	1/5	0.179424	0.651577	0	0	6.2052	10.6606	ITM2B
Negative Regulation Of Cell Size (GO:0045792)	1/5	0.179424	0.651577	0	0	6.2052	10.6606	RHOA
Negative Regulation Of Endoplasmic Reticulum Calcium Ion Concentration (GO:0032471)	1/5	0.179424	0.651577	0	0	6.2052	10.6606	TGM2
Negative Regulation Of Establishment Of Protein Localization To Mitochondrion (GO:1903748)	1/5	0.179424	0.651577	0	0	6.2052	10.6606	DNAJA1
Negative Regulation Of Heart Rate (GO:0010459)	1/5	0.179424	0.651577	0	0	6.2052	10.6606	SPTBN4
Negative Regulation Of Heterochromatin Formation (GO:0031452)	1/5	0.179424	0.651577	0	0	6.2052	10.6606	PHF1
Negative Regulation Of Insulin-Like Growth Factor Receptor Signaling Pathway (GO:0043569)	1/5	0.179424	0.651577	0	0	6.2052	10.6606	INPPL1
Negative Regulation Of Meiotic Cell Cycle (GO:0051447)	1/5	0.179424	0.651577	0	0	6.2052	10.6606	DUSP1
Negative Regulation Of Monocyte Chemotaxis (GO:0090027)	1/5	0.179424	0.651577	0	0	6.2052	10.6606	DUSP1
Negative Regulation Of Phospholipase Activity (GO:0010519)	1/5	0.179424	0.651577	0	0	6.2052	10.6606	PLA2R1
Negative Regulation Of Plasminogen Activation (GO:0010757)	1/5	0.179424	0.651577	0	0	6.2052	10.6606	SERPINE1
Negative Regulation Of Response To Reactive Oxygen Species (GO:1901032)	1/5	0.179424	0.651577	0	0	6.2052	10.6606	NFE2L2
Negative Regulation Of Sequestering Of Triglyceride (GO:0010891)	1/5	0.179424	0.651577	0	0	6.2052	10.6606	PNPLA2
Negative Regulation Of Stress-Activated Protein Kinase Signaling Cascade (GO:0070303)	1/5	0.179424	0.651577	0	0	6.2052	10.6606	PPIA
Negative Regulation Of Transcription From RNA Polymerase II Promoter In Response To Stress (GO:0097201)	1/5	0.179424	0.651577	0	0	6.2052	10.6606	JUN
Neuroblast Proliferation (GO:0007405)	1/5	0.179424	0.651577	0	0	6.2052	10.6606	PLXNB2
Neutrophil Degranulation (GO:0043312)	1/5	0.179424	0.651577	0	0	6.2052	10.6606	STXBP2
Nucleoside Triphosphate Biosynthetic Process (GO:0009142)	1/5	0.179424	0.651577	0	0	6.2052	10.6606	NME2
Nucleotide Transport (GO:0006862)	1/5	0.179424	0.651577	0	0	6.2052	10.6606	SLC25A33
Pentose-Phosphate Shunt, Non-Oxidative Branch (GO:0009052)	1/5	0.179424	0.651577	0	0	6.2052	10.6606	PHACTR1
Pexophagy (GO:0000425)	1/5	0.179424	0.651577	0	0	6.2052	10.6606	SQSTM1
Plasminogen Activation (GO:0031639)	1/5	0.179424	0.651577	0	0	6.2052	10.6606	PGK1
Positive Regulation Of I-kappaB Phosphorylation (GO:1903721)	1/5	0.179424	0.651577	0	0	6.2052	10.6606	DDRGK1
Positive Regulation Of Chemokine (C-X-C Motif) Ligand 2 Production (GO:2000343)	1/5	0.179424	0.651577	0	0	6.2052	10.6606	HMGB1
Positive Regulation Of Cholesterol Biosynthetic Process (GO:0045542)	1/5	0.179424	0.651577	0	0	6.2052	10.6606	SREBF2
Positive Regulation Of Cholesterol Storage (GO:0010886)	1/5	0.179424	0.651577	0	0	6.2052	10.6606	SREBF2
Positive Regulation Of Hemoglobin Biosynthetic Process (GO:0046985)	1/5	0.179424	0.651577	0	0	6.2052	10.6606	LDB1
Positive Regulation Of Mast Cell Activation (GO:0033005)	1/5	0.179424	0.651577	0	0	6.2052	10.6606	NR4A3
Positive Regulation Of Peroxisome Proliferator Activated Receptor Signaling Pathway (GO:0035360)	1/5	0.179424	0.651577	0	0	6.2052	10.6606	GPS2
Positive Regulation Of Sterol Biosynthetic Process (GO:0106120)	1/5	0.179424	0.651577	0	0	6.2052	10.6606	SREBF2
Positive Regulation Of Tau-Protein Kinase Activity (GO:1902949)	1/5	0.179424	0.651577	0	0	6.2052	10.6606	HSP90AA1
Postsynaptic Density Assembly (GO:0097107)	1/5	0.179424	0.651577	0	0	6.2052	10.6606	NRXN2
Postsynaptic Membrane Assembly (GO:0097104)	1/5	0.179424	0.651577	0	0	6.2052	10.6606	NRXN2
Protein Geranylgeranylation (GO:0018344)	1/5	0.179424	0.651577	0	0	6.2052	10.6606	RABGGTA
Protein Import (GO:0017038)	1/5	0.179424	0.651577	0	0	6.2052	10.6606	CLU
Protein Localization To Non-Motile Cilium (GO:0097499)	1/5	0.179424	0.651577	0	0	6.2052	10.6606	ARL13B
Protein Sulfation (GO:0006477)	1/5	0.179424	0.651577	0	0	6.2052	10.6606	UST
Protein Ufmylation (GO:0071569)	1/5	0.179424	0.651577	0	0	6.2052	10.6606	DDRGK1
Proton-Transporting V-type ATPase Complex Assembly (GO:0070070)	1/5	0.179424	0.651577	0	0	6.2052	10.6606	PIP4P1
Purine Nucleobase Biosynthetic Process (GO:0009113)	1/5	0.179424	0.651577	0	0	6.2052	10.6606	SHMT1
Pyrimidine Ribonucleotide Biosynthetic Process (GO:0009220)	1/5	0.179424	0.651577	0	0	6.2052	10.6606	CTPS2
Regulation Of MDA-5 Signaling Pathway (GO:0039533)	1/5	0.179424	0.651577	0	0	6.2052	10.6606	DDX60
Regulation Of Anion Channel Activity (GO:0010359)	1/5	0.179424	0.651577	0	0	6.2052	10.6606	PRNP
Regulation Of Atrial Cardiac Muscle Cell Membrane Repolarization (GO:0060372)	1/5	0.179424	0.651577	0	0	6.2052	10.6606	NPPA
Regulation Of Blood Vessel Remodeling (GO:0060312)	1/5	0.179424	0.651577	0	0	6.2052	10.6606	TMBIM1
Regulation Of Mitotic Cell Cycle (GO:0007346)	7/119	0.179509	0.651577	0	0	1.55503	2.67081	PRMT5;SMOC2;BTG2;USP2;EIF4EBP1;PIM3;ANAPC5
ncRNA Processing (GO:0034470)	6/98	0.180352	0.651577	0	0	1.62218	2.77853	NOP56;FBL;RPS27;SBDS;NOLC1;RRP9
Fc-epsilon Receptor Signaling Pathway (GO:0038095)	2/20	0.180703	0.651577	0	0	2.75961	4.72141	NR4A3;MAP2K7
Regulation Of Interleukin-4 Production (GO:0032673)	2/20	0.180703	0.651577	0	0	2.75961	4.72141	CEBPB;DDIT3
Acylglycerol Biosynthetic Process (GO:0046463)	2/20	0.180703	0.651577	0	0	2.75961	4.72141	DGAT2;PNPLA2
Regulation Of Meiotic Cell Cycle (GO:0051445)	2/20	0.180703	0.651577	0	0	2.75961	4.72141	DUSP1;ANAPC5
Respiratory Chain Complex IV Assembly (GO:0008535)	2/20	0.180703	0.651577	0	0	2.75961	4.72141	COX19;COX17
Chromosome Condensation (GO:0030261)	2/20	0.180703	0.651577	0	0	2.75961	4.72141	SMC4;SMC2
Cytoskeleton-Dependent Intracellular Transport (GO:0030705)	2/20	0.180703	0.651577	0	0	2.75961	4.72141	TUBA1C;HOOK2
Ribosomal Large Subunit Assembly (GO:0000027)	2/20	0.180703	0.651577	0	0	2.75961	4.72141	TRAF7;RRS1
Endoplasmic Reticulum Calcium Ion Homeostasis (GO:0032469)	2/20	0.180703	0.651577	0	0	2.75961	4.72141	HERPUD1;TGM2
Endothelial Cell Development (GO:0001885)	2/20	0.180703	0.651577	0	0	2.75961	4.72141	RAP1B;MSN
Positive Regulation Of G2/M Transition Of Mitotic Cell Cycle (GO:0010971)	2/20	0.180703	0.651577	0	0	2.75961	4.72141	RAD51B;TNFSF13B
Positive Regulation Of Lipid Catabolic Process (GO:0050996)	2/20	0.180703	0.651577	0	0	2.75961	4.72141	IRS2;PNPLA2
Protein Deacylation (GO:0035601)	2/20	0.180703	0.651577	0	0	2.75961	4.72141	HDAC10;SIRT7
Regulation Of Calcium Ion Transmembrane Transport (GO:1903169)	2/20	0.180703	0.651577	0	0	2.75961	4.72141	PRNP;NPPA
G2/M Transition Of Mitotic Cell Cycle (GO:0000086)	3/38	0.181695	0.651577	0	0	2.12981	3.63223	WEE1;CDK2;FBXL7
Acylglycerol Metabolic Process (GO:0006639)	3/38	0.181695	0.651577	0	0	2.12981	3.63223	GK5;DGAT2;PNPLA2
Amino Acid Catabolic Process (GO:0009063)	3/38	0.181695	0.651577	0	0	2.12981	3.63223	ALDH4A1;ETFB;PRODH
Regulation Of Release Of Cytochrome C From Mitochondria (GO:0090199)	3/38	0.181695	0.651577	0	0	2.12981	3.63223	PLSCR3;GHITM;CLU
Signal Release From Synapse (GO:0099643)	3/38	0.181695	0.651577	0	0	2.12981	3.63223	STXBP2;NRXN2;SYN3
Establishment Or Maintenance Of Epithelial Cell Apical/Basal Polarity (GO:0045197)	3/38	0.181695	0.651577	0	0	2.12981	3.63223	DLG2;MSN;RHOA
Lysosome Localization (GO:0032418)	3/38	0.181695	0.651577	0	0	2.12981	3.63223	FLCN;PIP4P1;NR4A3
Neuron Projection Extension (GO:1990138)	3/38	0.181695	0.651577	0	0	2.12981	3.63223	HSP90AA1;CTNNB1;LLPH
Positive Regulation Of miRNA Transcription (GO:1902895)	3/38	0.181695	0.651577	0	0	2.12981	3.63223	JUN;FOXO3;RELA
protein-DNA Complex Assembly (GO:0065004)	3/38	0.181695	0.651577	0	0	2.12981	3.63223	BRD2;NAA60;SSRP1
T Cell Activation (GO:0042110)	5/78	0.185141	0.651577	0	0	1.70307	2.87247	LMBR1L;CD80;MSN;PIK3R2;HSPD1
Negative Regulation Of Angiogenesis (GO:0016525)	5/78	0.185141	0.651577	0	0	1.70307	2.87247	NPPB;HGS;SERPINE1;PGK1;CTNNB1
Regulation Of Organelle Organization (GO:0033043)	6/99	0.18619	0.651577	0	0	1.60464	2.69737	SAR1A;VPS11;MSN;MIEF2;SIRT7;SQSTM1
Positive Regulation Of Macroautophagy (GO:0016239)	4/58	0.187049	0.651577	0	0	1.84121	3.08657	GPSM1;TBK1;WDR45;SLC25A4
Cellular Component Assembly (GO:0022607)	12/232	0.191365	0.651577	0	0	1.35843	2.24627	BAG6;RP1;ZFYVE27;SCIN;TSPAN4;CHCHD10;CFAP46;TLCD1;RHOA;PPID;RTN4;VAMP3
DNA Recombination (GO:0006310)	3/39	0.191569	0.651577	0	0	2.07053	3.42157	RAD51B;HDAC10;HMGB1
Double-Strand Break Repair Via Nonhomologous End Joining (GO:0006303)	3/39	0.191569	0.651577	0	0	2.07053	3.42157	DCLRE1C;PAXX;HMGB1
Positive Regulation Of Ossification (GO:0045778)	3/39	0.191569	0.651577	0	0	2.07053	3.42157	ZBTB16;PTPN11;TENT5A
Positive Regulation Of Ubiquitin-Dependent Protein Catabolic Process (GO:2000060)	5/79	0.191845	0.651577	0	0	1.67996	2.77372	DDRGK1;RAD23A;CSNK1E;CLU;SMAD7
Regulation Of Intracellular Steroid Hormone Receptor Signaling Pathway (GO:0033143)	2/21	0.194892	0.651577	0	0	2.61421	4.27505	DDX5;DDRGK1
Regulation Of Keratinocyte Proliferation (GO:0010837)	2/21	0.194892	0.651577	0	0	2.61421	4.27505	ZFP36;SRSF6
Anaphase-Promoting Complex-Dependent Catabolic Process (GO:0031145)	2/21	0.194892	0.651577	0	0	2.61421	4.27505	ANAPC5;FBXO31
Dendritic Cell Differentiation (GO:0097028)	2/21	0.194892	0.651577	0	0	2.61421	4.27505	CLU;TGFBR2
Early Endosome To Late Endosome Transport (GO:0045022)	2/21	0.194892	0.651577	0	0	2.61421	4.27505	HOOK2;EMP2
snRNA Metabolic Process (GO:0016073)	2/21	0.194892	0.651577	0	0	2.61421	4.27505	MEPCE;RBM7
Sulfur Compound Transport (GO:0072348)	2/21	0.194892	0.651577	0	0	2.61421	4.27505	SLC5A6;SLC35F3
Fatty Acid Derivative Biosynthetic Process (GO:1901570)	2/21	0.194892	0.651577	0	0	2.61421	4.27505	ACSS3;HMGCS2
Maturation Of 5.8S rRNA From Tricistronic rRNA Transcript (SSU-rRNA, 5.8S rRNA, LSU-rRNA) (GO:0000466)	2/21	0.194892	0.651577	0	0	2.61421	4.27505	RRS1;FTSJ3
Positive Regulation Of Glucose Import (GO:0046326)	2/21	0.194892	0.651577	0	0	2.61421	4.27505	IRS2;PTPN11
Positive Regulation Of Peptidase Activity (GO:0010952)	2/21	0.194892	0.651577	0	0	2.61421	4.27505	DDRGK1;MAPK12
Regulation Of Cell Junction Assembly (GO:1901888)	2/21	0.194892	0.651577	0	0	2.61421	4.27505	RAP1B;FLOT1
Regulation Of Cell-Substrate Junction Assembly (GO:0090109)	2/21	0.194892	0.651577	0	0	2.61421	4.27505	LDB1;RHOA
Response To Reactive Oxygen Species (GO:0000302)	4/59	0.194978	0.651577	0	0	1.80763	2.95524	JUN;PTPRN;SQSTM1;SOD1
Sulfur Compound Biosynthetic Process (GO:0044272)	4/59	0.194978	0.651577	0	0	1.80763	2.95524	GSTM1;CTH;UST;ST3GAL1
Fat Cell Differentiation (GO:0045444)	4/59	0.194978	0.651577	0	0	1.80763	2.95524	PER2;NR4A1;NR4A3;TMEM120A
Bone Development (GO:0060348)	3/40	0.201574	0.651577	0	0	2.01445	3.22634	GNAS;SBDS;TGM2
Cell Cycle G2/M Phase Transition (GO:0044839)	3/40	0.201574	0.651577	0	0	2.01445	3.22634	WEE1;CDK2;FBXL7
Regulation Of Transport (GO:0051049)	3/40	0.201574	0.651577	0	0	2.01445	3.22634	DNAJA1;PTPRN;ACTG1
Triglyceride Metabolic Process (GO:0006641)	3/40	0.201574	0.651577	0	0	2.01445	3.22634	GK5;DGAT2;PNPLA2
mRNA Transcription (GO:0009299)	3/40	0.201574	0.651577	0	0	2.01445	3.22634	DDX5;TAF13;NR1H2
Regulation Of JUN Kinase Activity (GO:0043506)	3/40	0.201574	0.651577	0	0	2.01445	3.22634	DNAJA1;NPPA;MAP2K7
Regulation Of T Cell Differentiation (GO:0045580)	3/40	0.201574	0.651577	0	0	2.01445	3.22634	KAT2A;ACTB;SOD1
Regulation Of Neurogenesis (GO:0050767)	4/60	0.203007	0.651577	0	0	1.77524	2.83065	PER2;MBD1;CTNNB1;TGM2
Negative Regulation Of Cell Differentiation (GO:0045596)	10/190	0.203935	0.651577	0	0	1.38279	2.19857	NFKBIA;CDK6;NR1H2;ZBTB16;NOCT;GPS2;PTPN11;ACTB;RUNX1T1;SMAD7
Mitochondrial Gene Expression (GO:0140053)	6/102	0.204133	0.651577	0	0	1.55422	2.46963	MRPL53;MTG1;MRPS23;MRPL38;FOXO3;SLC25A33
Regulation Of Protein Localization (GO:0032880)	5/81	0.205503	0.651577	0	0	1.63556	2.58793	HSP90AA1;SUMO3;CTNNB1;CSNK1E;CTSD
Defense Response To Virus (GO:0051607)	8/146	0.206618	0.651577	0	0	1.44225	2.27426	RNASEL;TBK1;TRIM28;STAT2;TTC4;DDX60;SERINC3;RELA
ERK1 And ERK2 Cascade (GO:0070371)	2/22	0.209213	0.651577	0	0	2.48336	3.88496	DUSP5;DUSP7
Regulation Of Histone Acetylation (GO:0035065)	2/22	0.209213	0.651577	0	0	2.48336	3.88496	FLCN;SF3B1
Regulation Of Intracellular Estrogen Receptor Signaling Pathway (GO:0033146)	2/22	0.209213	0.651577	0	0	2.48336	3.88496	DDRGK1;VPS11
Blood Vessel Endothelial Cell Migration (GO:0043534)	2/22	0.209213	0.651577	0	0	2.48336	3.88496	NR4A1;EMP2
Cardiac Conduction System Development (GO:0003161)	2/22	0.209213	0.651577	0	0	2.48336	3.88496	NPPB;NPPA
Regulation Of Ruffle Assembly (GO:1900027)	2/22	0.209213	0.651577	0	0	2.48336	3.88496	EPS8L1;PFN1
Telomere Maintenance Via Telomere Lengthening (GO:0010833)	2/22	0.209213	0.651577	0	0	2.48336	3.88496	HSP90AA1;PTGES3
Meiosis I (GO:0007127)	2/22	0.209213	0.651577	0	0	2.48336	3.88496	ING2;ZSCAN21
Negative Regulation Of TORC1 Signaling (GO:1904262)	2/22	0.209213	0.651577	0	0	2.48336	3.88496	CASTOR2;RNF152
Negative Regulation Of Endothelial Cell Apoptotic Process (GO:2000352)	2/22	0.209213	0.651577	0	0	2.48336	3.88496	SERPINE1;NFE2L2
Negative Regulation Of Intrinsic Apoptotic Signaling Pathway In Response To DNA Damage (GO:1902230)	2/22	0.209213	0.651577	0	0	2.48336	3.88496	ING2;CLU
Peptidyl-Glutamic Acid Modification (GO:0018200)	2/22	0.209213	0.651577	0	0	2.48336	3.88496	CFAP20;NAA80
Platelet Dense Granule Organization (GO:0060155)	2/22	0.209213	0.651577	0	0	2.48336	3.88496	HPS1;AP1S2
Regulation Of Cellular Response To Stress (GO:0080135)	6/103	0.210249	0.651577	0	0	1.53811	2.39863	CHCHD2;KAT2A;CRY1;UBE2V1;SIRT7;NFE2L2
Regulation Of Cellular Response To Hypoxia (GO:1900037)	1/6	0.211249	0.651577	0	0	4.96387	7.71741	CHCHD2
ADP Transport (GO:0015866)	1/6	0.211249	0.651577	0	0	4.96387	7.71741	SLC25A4
ATF6-mediated Unfolded Protein Response (GO:0036500)	1/6	0.211249	0.651577	0	0	4.96387	7.71741	DDIT3
ATP Biosynthetic Process (GO:0006754)	1/6	0.211249	0.651577	0	0	4.96387	7.71741	ALDOA
Regulation Of Chemokine (C-C Motif) Ligand 5 Production (GO:0071649)	1/6	0.211249	0.651577	0	0	4.96387	7.71741	DDX3X
ER Overload Response (GO:0006983)	1/6	0.211249	0.651577	0	0	4.96387	7.71741	DDIT3
Regulation Of Endodeoxyribonuclease Activity (GO:0032071)	1/6	0.211249	0.651577	0	0	4.96387	7.71741	HMGB1
Regulation Of Hemoglobin Biosynthetic Process (GO:0046984)	1/6	0.211249	0.651577	0	0	4.96387	7.71741	LDB1
Regulation Of Heterochromatin Formation (GO:0031445)	1/6	0.211249	0.651577	0	0	4.96387	7.71741	CDK2
Regulation Of Histamine Secretion By Mast Cell (GO:1903593)	1/6	0.211249	0.651577	0	0	4.96387	7.71741	VAMP3
Regulation Of Hydrogen Peroxide-Induced Cell Death (GO:1903205)	1/6	0.211249	0.651577	0	0	4.96387	7.71741	NFE2L2
Regulation Of Leukocyte Degranulation (GO:0043300)	1/6	0.211249	0.651577	0	0	4.96387	7.71741	STXBP2
Alditol Metabolic Process (GO:0019400)	1/6	0.211249	0.651577	0	0	4.96387	7.71741	GK5
Auditory Receptor Cell Morphogenesis (GO:0002093)	1/6	0.211249	0.651577	0	0	4.96387	7.71741	SOD1
Auditory Receptor Cell Stereocilium Organization (GO:0060088)	1/6	0.211249	0.651577	0	0	4.96387	7.71741	SOD1
Cardiolipin Biosynthetic Process (GO:0032049)	1/6	0.211249	0.651577	0	0	4.96387	7.71741	PLSCR3
Regulation Of Respiratory Gaseous Exchange (GO:0043576)	1/6	0.211249	0.651577	0	0	4.96387	7.71741	MTG1
Regulation Of Respiratory System Process (GO:0044065)	1/6	0.211249	0.651577	0	0	4.96387	7.71741	MTG1
Regulation Of Skeletal Muscle Contraction (GO:0014819)	1/6	0.211249	0.651577	0	0	4.96387	7.71741	DMPK
Cellular Response To Angiotensin (GO:1904385)	1/6	0.211249	0.651577	0	0	4.96387	7.71741	RELA
Cellular Response To Interferon-Alpha (GO:0035457)	1/6	0.211249	0.651577	0	0	4.96387	7.71741	IFNAR1
Cellular Response To Nitric Oxide (GO:0071732)	1/6	0.211249	0.651577	0	0	4.96387	7.71741	CDK2
Cellular Response To Reactive Nitrogen Species (GO:1902170)	1/6	0.211249	0.651577	0	0	4.96387	7.71741	CDK2
Cleavage Furrow Formation (GO:0036089)	1/6	0.211249	0.651577	0	0	4.96387	7.71741	RHOA
Dermatan Sulfate Proteoglycan Biosynthetic Process (GO:0050651)	1/6	0.211249	0.651577	0	0	4.96387	7.71741	UST
Detection Of Muscle Stretch (GO:0035995)	1/6	0.211249	0.651577	0	0	4.96387	7.71741	CTNNB1
Detection Of Stimulus Involved In Sensory Perception Of Pain (GO:0062149)	1/6	0.211249	0.651577	0	0	4.96387	7.71741	TMEM120A
Retinal Rod Cell Differentiation (GO:0060221)	1/6	0.211249	0.651577	0	0	4.96387	7.71741	RP1
Ribosomal Large Subunit Export From Nucleus (GO:0000055)	1/6	0.211249	0.651577	0	0	4.96387	7.71741	SDAD1
Stress-Induced Premature Senescence (GO:0090400)	1/6	0.211249	0.651577	0	0	4.96387	7.71741	PLA2R1
Excitatory Chemical Synaptic Transmission (GO:0098976)	1/6	0.211249	0.651577	0	0	4.96387	7.71741	GRIN2D
Gamma-Aminobutyric Acid Transport (GO:0015812)	1/6	0.211249	0.651577	0	0	4.96387	7.71741	SLC6A6
Gland Morphogenesis (GO:0022612)	1/6	0.211249	0.651577	0	0	4.96387	7.71741	MSN
Glandular Epithelial Cell Development (GO:0002068)	1/6	0.211249	0.651577	0	0	4.96387	7.71741	CDK6
Transcription Initiation At RNA Polymerase I Promoter (GO:0006361)	1/6	0.211249	0.651577	0	0	4.96387	7.71741	POLR1E
Glutathione Biosynthetic Process (GO:0006750)	1/6	0.211249	0.651577	0	0	4.96387	7.71741	GCLM
Type B Pancreatic Cell Development (GO:0003323)	1/6	0.211249	0.651577	0	0	4.96387	7.71741	CDK6
Vacuole Organization (GO:0007033)	1/6	0.211249	0.651577	0	0	4.96387	7.71741	VPS11
Very-Low-Density Lipoprotein Particle Remodeling (GO:0034372)	1/6	0.211249	0.651577	0	0	4.96387	7.71741	LCAT
Hepoxilin Biosynthetic Process (GO:0051122)	1/6	0.211249	0.651577	0	0	4.96387	7.71741	GSTM1
Hepoxilin Metabolic Process (GO:0051121)	1/6	0.211249	0.651577	0	0	4.96387	7.71741	GSTM1
White Fat Cell Differentiation (GO:0050872)	1/6	0.211249	0.651577	0	0	4.96387	7.71741	PER2
Immunological Synapse Formation (GO:0001771)	1/6	0.211249	0.651577	0	0	4.96387	7.71741	MSN
Insulin Secretion Involved In Cellular Response To Glucose Stimulus (GO:0035773)	1/6	0.211249	0.651577	0	0	4.96387	7.71741	PTPRN
Intraciliary Transport Involved In Cilium Assembly (GO:0035735)	1/6	0.211249	0.651577	0	0	4.96387	7.71741	MBD1
Lactate Metabolic Process (GO:0006089)	1/6	0.211249	0.651577	0	0	4.96387	7.71741	PER2
Locomotor Rhythm (GO:0045475)	1/6	0.211249	0.651577	0	0	4.96387	7.71741	USP2
Membrane Biogenesis (GO:0044091)	1/6	0.211249	0.651577	0	0	4.96387	7.71741	TLCD1
Negative Regulation Of RNA Biosynthetic Process (GO:1902679)	1/6	0.211249	0.651577	0	0	4.96387	7.71741	RESF1
Negative Regulation Of T-helper 17 Type Immune Response (GO:2000317)	1/6	0.211249	0.651577	0	0	4.96387	7.71741	SMAD7
Negative Regulation Of Centriole Replication (GO:0046600)	1/6	0.211249	0.651577	0	0	4.96387	7.71741	KAT2A
Negative Regulation Of p38MAPK Cascade (GO:1903753)	1/6	0.211249	0.651577	0	0	4.96387	7.71741	DUSP1
Negative Regulation Of Protein Maturation (GO:1903318)	1/6	0.211249	0.651577	0	0	4.96387	7.71741	PRNP
Negative Regulation Of Protein Sumoylation (GO:0033234)	1/6	0.211249	0.651577	0	0	4.96387	7.71741	CTNNB1
Negative Regulation Of Regulated Secretory Pathway (GO:1903306)	1/6	0.211249	0.651577	0	0	4.96387	7.71741	RAP1B
Negative Regulation Of Response To Type II Interferon (GO:0060331)	1/6	0.211249	0.651577	0	0	4.96387	7.71741	NR1H2
Negative Regulation Of Single Stranded Viral RNA Replication Via Double Stranded DNA Intermediate (GO:0045869)	1/6	0.211249	0.651577	0	0	4.96387	7.71741	RESF1
Negative Regulation Of Type II Interferon-Mediated Signaling Pathway (GO:0060336)	1/6	0.211249	0.651577	0	0	4.96387	7.71741	NR1H2
Neuron Projection Arborization (GO:0140058)	1/6	0.211249	0.651577	0	0	4.96387	7.71741	PHACTR1
Neurotrophin TRK Receptor Signaling Pathway (GO:0048011)	1/6	0.211249	0.651577	0	0	4.96387	7.71741	ZFYVE27
Peptidyl-Arginine Modification (GO:0018195)	1/6	0.211249	0.651577	0	0	4.96387	7.71741	PRMT5
Positive Regulation Of Cell-Cell Adhesion Mediated By Cadherin (GO:2000049)	1/6	0.211249	0.651577	0	0	4.96387	7.71741	FLOT1
Positive Regulation Of Endoplasmic Reticulum Stress-Induced Intrinsic Apoptotic Signaling Pathway (GO:1902237)	1/6	0.211249	0.651577	0	0	4.96387	7.71741	DDIT3
Positive Regulation Of Leukocyte Differentiation (GO:1902107)	1/6	0.211249	0.651577	0	0	4.96387	7.71741	HMGB1
Positive Regulation Of Lipoprotein Lipase Activity (GO:0051006)	1/6	0.211249	0.651577	0	0	4.96387	7.71741	NR1H2
Positive Regulation Of Necrotic Cell Death (GO:0010940)	1/6	0.211249	0.651577	0	0	4.96387	7.71741	SLC6A6
Positive Regulation Of Plasminogen Activation (GO:0010756)	1/6	0.211249	0.651577	0	0	4.96387	7.71741	PLGRKT
Positive Regulation Of Toll-Like Receptor 3 Signaling Pathway (GO:0034141)	1/6	0.211249	0.651577	0	0	4.96387	7.71741	FLOT1
Positive Regulation Of Triglyceride Catabolic Process (GO:0010898)	1/6	0.211249	0.651577	0	0	4.96387	7.71741	PNPLA2
Protein Import Into Peroxisome Matrix, Receptor Recycling (GO:0016562)	1/6	0.211249	0.651577	0	0	4.96387	7.71741	PEX6
Protein Localization To Ciliary Membrane (GO:1903441)	1/6	0.211249	0.651577	0	0	4.96387	7.71741	ARL13B
rDNA Heterochromatin Formation (GO:0000183)	1/6	0.211249	0.651577	0	0	4.96387	7.71741	RRP8
Regulation Of CD4-positive, Alpha-Beta T Cell Proliferation (GO:2000561)	1/6	0.211249	0.651577	0	0	4.96387	7.71741	TGFBR2
Regulation Of I-kappaB Phosphorylation (GO:1903719)	1/6	0.211249	0.651577	0	0	4.96387	7.71741	DDRGK1
Regulation Of T-helper 1 Cell Differentiation (GO:0045625)	1/6	0.211249	0.651577	0	0	4.96387	7.71741	CD80
Regulation Of Interleukin-2 Production (GO:0032663)	3/41	0.211698	0.651577	0	0	1.96133	3.04514	PRNP;ZFP36;CD80
Positive Regulation Of Epithelial To Mesenchymal Transition (GO:0010718)	3/41	0.211698	0.651577	0	0	1.96133	3.04514	CTNNB1;EMP2;TGFBR2
Vesicle Organization (GO:0016050)	5/82	0.21245	0.651577	0	0	1.61422	2.5005	SAR1A;HOOK2;VPS11;SQSTM1;VAMP3
Negative Regulation Of Canonical Wnt Signaling Pathway (GO:0090090)	6/104	0.216428	0.651577	0	0	1.52232	2.32991	LMBR1L;FRMD8;DDIT3;SIAH2;CTNND1;RBMS3
Negative Regulation Of Growth (GO:0045926)	6/104	0.216428	0.651577	0	0	1.52232	2.32991	NPPB;TCHP;FLCN;DDX3X;MYL2;RTN4
Protein Localization To Plasma Membrane (GO:0072659)	7/126	0.217486	0.651577	0	0	1.46296	2.23192	SPTBN4;ZFYVE27;EHD4;GORASP1;BSG;FLOT1;EMP2
Positive Regulation Of Developmental Process (GO:0051094)	11/216	0.218391	0.651577	0	0	1.33556	2.03202	SLC6A6;ING2;PHLDB1;CEBPB;ZBTB16;SHLD1;CTNNB1;MIEF2;CCN2;LLPH;RTN4
I-kappaB kinase/NF-kappaB Signaling (GO:0007249)	3/42	0.221929	0.651577	0	0	1.91093	2.8767	NFKBIA;TBK1;RELA
Spermatid Development (GO:0007286)	3/42	0.221929	0.651577	0	0	1.91093	2.8767	ING2;RFX2;NME5
Neural Crest Cell Development (GO:0014032)	3/42	0.221929	0.651577	0	0	1.91093	2.8767	SEMA3B;NOLC1;NRTN
Brain Development (GO:0007420)	8/149	0.22202	0.651577	0	0	1.41132	2.12401	BAG6;CENPF;PLXNB2;PTPN11;CIC;RTN4;GRIN2D;TGFBR2
Negative Regulation Of Apoptotic Process (GO:0043066)	20/427	0.222498	0.651577	0	0	1.2247	1.84053	HSPA9;DDX3X;SHC1;ANXA4;SIAH2;NME2;MERTK;CLU;RELA;HYPK;HSPD1;SOD1;DNAJA1;DDRGK1;TMBIM1;FKBP8;CTNNB1;PIM3;CRYAB;GRINA
Cilium Assembly (GO:0060271)	11/217	0.222658	0.651577	0	0	1.329	1.99631	RP1;EHD4;ARL13B;UBXN10;TCTN2;MBD1;TCTN1;CEP164;RFX2;CFAP46;CFAP20
Mitotic Cell Cycle Phase Transition (GO:0044772)	6/105	0.222668	0.651577	0	0	1.50686	2.26341	CCND3;WEE1;CDK6;CDK2;EIF4EBP1;FBXL7
Negative Regulation Of Wnt Signaling Pathway (GO:0030178)	7/127	0.223135	0.651577	0	0	1.45068	2.17599	LMBR1L;WWOX;FRMD8;DDIT3;SIAH2;CTNND1;RBMS3
Regulation Of Endoplasmic Reticulum Stress-Induced Intrinsic Apoptotic Signaling Pathway (GO:1902235)	2/23	0.223636	0.651577	0	0	2.36496	3.54209	DDIT3;HERPUD1
U2-type Prespliceosome Assembly (GO:1903241)	2/23	0.223636	0.651577	0	0	2.36496	3.54209	SNRPF;SF3B1
Apoptotic Cell Clearance (GO:0043277)	2/23	0.223636	0.651577	0	0	2.36496	3.54209	HMGB1;TGM2
Artery Development (GO:0060840)	2/23	0.223636	0.651577	0	0	2.36496	3.54209	SMAD7;TGFBR2
Regulation Of Transcription By RNA Polymerase III (GO:0006359)	2/23	0.223636	0.651577	0	0	2.36496	3.54209	MAF1;SF3B1
Chemical Synaptic Transmission, Postsynaptic (GO:0099565)	2/23	0.223636	0.651577	0	0	2.36496	3.54209	NPFF;GRIN2D
Response To Hexose (GO:0009746)	2/23	0.223636	0.651577	0	0	2.36496	3.54209	PFKL;IRS2
Retina Homeostasis (GO:0001895)	2/23	0.223636	0.651577	0	0	2.36496	3.54209	ACTG1;SOD1
Diacylglycerol Metabolic Process (GO:0046339)	2/23	0.223636	0.651577	0	0	2.36496	3.54209	DGAT2;PNPLA2
Translesion Synthesis (GO:0019985)	2/23	0.223636	0.651577	0	0	2.36496	3.54209	PARP10;TNFSF13B
Negative Regulation Of NIK/NF-kappaB Signaling (GO:1901223)	2/23	0.223636	0.651577	0	0	2.36496	3.54209	DDX3X;RELA
Peptidyl-Lysine Methylation (GO:0018022)	2/23	0.223636	0.651577	0	0	2.36496	3.54209	SETD6;ETFBKMT
Positive Regulation Of Cell Cycle G2/M Phase Transition (GO:1902751)	2/23	0.223636	0.651577	0	0	2.36496	3.54209	RAD51B;TNFSF13B
Positive Regulation Of mRNA Processing (GO:0050685)	2/23	0.223636	0.651577	0	0	2.36496	3.54209	RBM3;PRMT5
Positive Regulation Of Nitric Oxide Biosynthetic Process (GO:0045429)	2/23	0.223636	0.651577	0	0	2.36496	3.54209	HSP90AA1;CLU
Positive Regulation Of Protein Targeting To Membrane (GO:0090314)	2/23	0.223636	0.651577	0	0	2.36496	3.54209	PRNP;MIEF2
Protein N-linked Glycosylation Via Asparagine (GO:0018279)	2/23	0.223636	0.651577	0	0	2.36496	3.54209	DPM1;PSMD2
Protein Exit From Endoplasmic Reticulum (GO:0032527)	2/23	0.223636	0.651577	0	0	2.36496	3.54209	OS9;HERPUD1
Regulation Of Cell Size (GO:0008361)	2/23	0.223636	0.651577	0	0	2.36496	3.54209	MSN;RHOA
Endocytosis (GO:0006897)	9/173	0.229654	0.651577	0	0	1.36521	2.00847	LMBR1L;CYTH2;EHD4;HOOK2;INPPL1;CSNK1E;MERTK;RHOBTB1;LRP1B
Regulation Of Nervous System Development (GO:0051960)	3/43	0.232257	0.651577	0	0	1.86304	2.71988	PER2;CTNNB1;ZPR1
Regulation Of Protein Modification Process (GO:0031399)	3/43	0.232257	0.651577	0	0	1.86304	2.71988	FLCN;STAT2;PLXNB2
Intracellular Protein Transmembrane Transport (GO:0065002)	3/43	0.232257	0.651577	0	0	1.86304	2.71988	PEX6;ZFAND2B;HSPD1
Neurotransmitter Secretion (GO:0007269)	3/43	0.232257	0.651577	0	0	1.86304	2.71988	STXBP2;NRXN2;SYN3
Positive Regulation Of Nervous System Development (GO:0051962)	3/43	0.232257	0.651577	0	0	1.86304	2.71988	CLSTN2;IL1RAPL1;TGM2
Positive Regulation Of Nucleocytoplasmic Transport (GO:0046824)	3/43	0.232257	0.651577	0	0	1.86304	2.71988	TRIM28;PIK3R2;ZPR1
Negative Regulation Of Cytokine Production (GO:0001818)	8/151	0.232517	0.651577	0	0	1.39141	2.02978	PRNP;ZFP36;ELF4;DDIT3;ANXA4;PTPN11;HMGB1;ASB1
Positive Regulation Of DNA Repair (GO:0045739)	5/85	0.23372	0.651577	0	0	1.55342	2.25809	HDAC10;TRIM28;HMGB1;SPIDR;ACTB
Regulation Of Tumor Necrosis Factor Production (GO:0032680)	6/107	0.235323	0.651577	0	0	1.47685	2.1367	ZFP36;FRMD8;ELF4;PTPN11;HMGB1;CLU
Phospholipid Metabolic Process (GO:0006644)	4/64	0.236024	0.651577	0	0	1.65651	2.3917	SMPD2;PIP4P1;GPX4;LCAT
Regulation Of Actin Filament Polymerization (GO:0030833)	4/64	0.236024	0.651577	0	0	1.65651	2.3917	ARHGAP18;TWF1;PFN1;LMOD2
Regulation Of Chromosome Segregation (GO:0051983)	2/24	0.238131	0.651577	0	0	2.25733	3.23913	SMC4;SMC2
RNA Splicing, Via Transesterification Reactions (GO:0000375)	2/24	0.238131	0.651577	0	0	2.25733	3.23913	MPHOSPH10;SF3B1
Regulation Of Mitochondrial Fission (GO:0090140)	2/24	0.238131	0.651577	0	0	2.25733	3.23913	STAT2;MIEF2
Stress Granule Assembly (GO:0034063)	2/24	0.238131	0.651577	0	0	2.25733	3.23913	ATXN2L;DDX3X
Hematopoietic Progenitor Cell Differentiation (GO:0002244)	2/24	0.238131	0.651577	0	0	2.25733	3.23913	LMBR1L;SBDS
Organelle Fusion (GO:0048284)	2/24	0.238131	0.651577	0	0	2.25733	3.23913	VPS11;MIEF2
Peroxisome Organization (GO:0007031)	2/24	0.238131	0.651577	0	0	2.25733	3.23913	PEX6;PEX11B
Positive Regulation Of Cellular Response To Transforming Growth Factor Beta Stimulus (GO:1903846)	2/24	0.238131	0.651577	0	0	2.25733	3.23913	FLCN;ING2
Positive Regulation Of Nitric Oxide Metabolic Process (GO:1904407)	2/24	0.238131	0.651577	0	0	2.25733	3.23913	HSP90AA1;CLU
Positive Regulation Of Transforming Growth Factor Beta Receptor Signaling Pathway (GO:0030511)	2/24	0.238131	0.651577	0	0	2.25733	3.23913	FLCN;ING2
Protein Targeting To Lysosome (GO:0006622)	2/24	0.238131	0.651577	0	0	2.25733	3.23913	HGS;CLU
ERAD Pathway (GO:0036503)	5/86	0.240941	0.651577	0	0	1.53415	2.1834	BAG6;OS9;UBXN10;UBXN6;HERPUD1
Positive Regulation Of Protein-Containing Complex Assembly (GO:0031334)	5/86	0.240941	0.651577	0	0	1.53415	2.1834	RAP1B;HSP90AA1;DDX3X;CLU;SPIDR
Mitotic Sister Chromatid Segregation (GO:0000070)	6/108	0.241732	0.651577	0	0	1.46228	2.07634	RRS1;KIF11;SMC4;RHOA;SMC2;EML3
Regulation Of Cell Motility (GO:2000145)	6/108	0.241732	0.651577	0	0	1.46228	2.07634	CDK6;LDB1;ARHGAP18;PLXNB2;CFAP20;RHOA
7-Methylguanosine Cap Hypermethylation (GO:0036261)	1/7	0.241842	0.651577	0	0	4.13632	5.87138	SNRPF
Regulation Of Dendritic Spine Maintenance (GO:1902950)	1/7	0.241842	0.651577	0	0	4.13632	5.87138	PRNP
DNA Topological Change (GO:0006265)	1/7	0.241842	0.651577	0	0	4.13632	5.87138	HMGB1
Regulation Of Epidermis Development (GO:0045682)	1/7	0.241842	0.651577	0	0	4.13632	5.87138	NME2
Regulation Of Epithelial To Mesenchymal Transition Involved In Endocardial Cushion Formation (GO:1905005)	1/7	0.241842	0.651577	0	0	4.13632	5.87138	TGFBR2
Regulation Of Establishment Of Protein Localization To Mitochondrion (GO:1903747)	1/7	0.241842	0.651577	0	0	4.13632	5.87138	DNAJA1
N-terminal Peptidyl-Methionine Acetylation (GO:0017196)	1/7	0.241842	0.651577	0	0	4.13632	5.87138	NAA60
Notch Receptor Processing (GO:0007220)	1/7	0.241842	0.651577	0	0	4.13632	5.87138	APH1A
RNA Capping (GO:0036260)	1/7	0.241842	0.651577	0	0	4.13632	5.87138	SNRPF
SREBP Signaling Pathway (GO:0032933)	1/7	0.241842	0.651577	0	0	4.13632	5.87138	SREBF2
Actin-Mediated Cell Contraction (GO:0070252)	1/7	0.241842	0.651577	0	0	4.13632	5.87138	EMP2
Regulation Of Lipase Activity (GO:0060191)	1/7	0.241842	0.651577	0	0	4.13632	5.87138	RHOA
Acute-Phase Response (GO:0006953)	1/7	0.241842	0.651577	0	0	4.13632	5.87138	CEBPB
Aldehyde Catabolic Process (GO:0046185)	1/7	0.241842	0.651577	0	0	4.13632	5.87138	ALDH2
Regulation Of Mitochondrial Gene Expression (GO:0062125)	1/7	0.241842	0.651577	0	0	4.13632	5.87138	MTG1
Regulation Of Mitotic Centrosome Separation (GO:0046602)	1/7	0.241842	0.651577	0	0	4.13632	5.87138	KIF11
Regulation Of Morphogenesis Of An Epithelium (GO:1905330)	1/7	0.241842	0.651577	0	0	4.13632	5.87138	RNF207
Regulation Of Myeloid Leukocyte Differentiation (GO:0002761)	1/7	0.241842	0.651577	0	0	4.13632	5.87138	CEBPB
Regulation Of Organ Growth (GO:0046620)	1/7	0.241842	0.651577	0	0	4.13632	5.87138	SOD1
Regulation Of Protein ADP-ribosylation (GO:0010835)	1/7	0.241842	0.651577	0	0	4.13632	5.87138	PUM3
Regulation Of Protein Localization To Cell Cortex (GO:1904776)	1/7	0.241842	0.651577	0	0	4.13632	5.87138	EPB41L2
Regulation Of Response To Wounding (GO:1903034)	1/7	0.241842	0.651577	0	0	4.13632	5.87138	SRSF6
Regulation Of Single Stranded Viral RNA Replication Via Double Stranded DNA Intermediate (GO:0045091)	1/7	0.241842	0.651577	0	0	4.13632	5.87138	RESF1
Cellular Response To Leptin Stimulus (GO:0044320)	1/7	0.241842	0.651577	0	0	4.13632	5.87138	NR4A3
Regulation Of Transcription From RNA Polymerase II Promoter In Response To Hypoxia (GO:0061418)	1/7	0.241842	0.651577	0	0	4.13632	5.87138	NFE2L2
Regulation Of Viral-Induced Cytoplasmic Pattern Recognition Receptor Signaling Pathway (GO:0039531)	1/7	0.241842	0.651577	0	0	4.13632	5.87138	SLC15A2
Cyclic Nucleotide Transport (GO:0070729)	1/7	0.241842	0.651577	0	0	4.13632	5.87138	LRRC8A
Cytoplasmic Sequestering Of NF-kappaB (GO:0007253)	1/7	0.241842	0.651577	0	0	4.13632	5.87138	NFKBIA
Dendritic Spine Maintenance (GO:0097062)	1/7	0.241842	0.651577	0	0	4.13632	5.87138	PRNP
Depyrimidination (GO:0045008)	1/7	0.241842	0.651577	0	0	4.13632	5.87138	NEIL2
siRNA Processing (GO:0030422)	1/7	0.241842	0.651577	0	0	4.13632	5.87138	TARBP2
Sialylation (GO:0097503)	1/7	0.241842	0.651577	0	0	4.13632	5.87138	ST3GAL1
Endonucleolytic Cleavage In ITS1 To Separate SSU-rRNA From 5.8S rRNA And LSU-rRNA From Tricistronic rRNA Transcript (SSU-rRNA, 5.8S rRNA, LSU-rRNA) (GO:0000447)	1/7	0.241842	0.651577	0	0	4.13632	5.87138	RRS1
Skeletal Myofibril Assembly (GO:0014866)	1/7	0.241842	0.651577	0	0	4.13632	5.87138	ACTC1
Endothelial Cell Chemotaxis (GO:0035767)	1/7	0.241842	0.651577	0	0	4.13632	5.87138	NR4A1
Spermidine Metabolic Process (GO:0008216)	1/7	0.241842	0.651577	0	0	4.13632	5.87138	HDAC10
Sphingosine-1-Phosphate Receptor Signaling Pathway (GO:0003376)	1/7	0.241842	0.651577	0	0	4.13632	5.87138	MFSD2B
Establishment Of Protein Localization To Peroxisome (GO:0072663)	1/7	0.241842	0.651577	0	0	4.13632	5.87138	PEX6
Sulfur Amino Acid Biosynthetic Process (GO:0000097)	1/7	0.241842	0.651577	0	0	4.13632	5.87138	CTH
Fructose Metabolic Process (GO:0006000)	1/7	0.241842	0.651577	0	0	4.13632	5.87138	ALDOA
Gas Transport (GO:0015669)	1/7	0.241842	0.651577	0	0	4.13632	5.87138	MB
Glucan Biosynthetic Process (GO:0009250)	1/7	0.241842	0.651577	0	0	4.13632	5.87138	PER2
Triglyceride-Rich Lipoprotein Particle Remodeling (GO:0034370)	1/7	0.241842	0.651577	0	0	4.13632	5.87138	LCAT
Glycine Metabolic Process (GO:0006544)	1/7	0.241842	0.651577	0	0	4.13632	5.87138	SHMT1
Glycogen Biosynthetic Process (GO:0005978)	1/7	0.241842	0.651577	0	0	4.13632	5.87138	PER2
Hematopoietic Stem Cell Differentiation (GO:0060218)	1/7	0.241842	0.651577	0	0	4.13632	5.87138	LMBR1L
Mast Cell Activation Involved In Immune Response (GO:0002279)	1/7	0.241842	0.651577	0	0	4.13632	5.87138	NR4A3
Mast Cell Degranulation (GO:0043303)	1/7	0.241842	0.651577	0	0	4.13632	5.87138	NR4A3
Modification-Dependent Macromolecule Catabolic Process (GO:0043632)	1/7	0.241842	0.651577	0	0	4.13632	5.87138	UBA52
Negative Regulation Of B Cell Apoptotic Process (GO:0002903)	1/7	0.241842	0.651577	0	0	4.13632	5.87138	IRS2
Negative Regulation Of RNA Catabolic Process (GO:1902369)	1/7	0.241842	0.651577	0	0	4.13632	5.87138	PHAX
Negative Regulation Of T-helper 17 Cell Differentiation (GO:2000320)	1/7	0.241842	0.651577	0	0	4.13632	5.87138	SMAD7
Negative Regulation Of Cholesterol Storage (GO:0010887)	1/7	0.241842	0.651577	0	0	4.13632	5.87138	NR1H2
Negative Regulation Of Protein-Containing Complex Disassembly (GO:0043242)	1/7	0.241842	0.651577	0	0	4.13632	5.87138	PHF23
Negative Regulation Of Transcription By RNA Polymerase I (GO:0016479)	1/7	0.241842	0.651577	0	0	4.13632	5.87138	MAF1
Nonribosomal Peptide Biosynthetic Process (GO:0019184)	1/7	0.241842	0.651577	0	0	4.13632	5.87138	GCLM
Nucleolar Chromatin Organization (GO:1990700)	1/7	0.241842	0.651577	0	0	4.13632	5.87138	RRP8
Nucleoside Metabolic Process (GO:0009116)	1/7	0.241842	0.651577	0	0	4.13632	5.87138	NME5
Peptidyl-Proline Hydroxylation To 4-hydroxy-L-proline (GO:0018401)	1/7	0.241842	0.651577	0	0	4.13632	5.87138	EGLN2
Phosphatidylserine Acyl-Chain Remodeling (GO:0036150)	1/7	0.241842	0.651577	0	0	4.13632	5.87138	OSBPL5
Positive Regulation Of RIG-I Signaling Pathway (GO:1900246)	1/7	0.241842	0.651577	0	0	4.13632	5.87138	DDX60
Positive Regulation Of Cellular Senescence (GO:2000774)	1/7	0.241842	0.651577	0	0	4.13632	5.87138	YPEL3
Positive Regulation Of Extracellular Matrix Assembly (GO:1901203)	1/7	0.241842	0.651577	0	0	4.13632	5.87138	PHLDB1
Positive Regulation Of Gluconeogenesis (GO:0045722)	1/7	0.241842	0.651577	0	0	4.13632	5.87138	SIRT7
Positive Regulation Of Ligase Activity (GO:0051351)	1/7	0.241842	0.651577	0	0	4.13632	5.87138	GCLM
Positive Regulation Of Megakaryocyte Differentiation (GO:0045654)	1/7	0.241842	0.651577	0	0	4.13632	5.87138	SCIN
Positive Regulation Of Nitric-Oxide Synthase Biosynthetic Process (GO:0051770)	1/7	0.241842	0.651577	0	0	4.13632	5.87138	NAMPT
Positive Regulation Of Ryanodine-Sensitive Calcium-Release Channel Activity (GO:0060316)	1/7	0.241842	0.651577	0	0	4.13632	5.87138	GSTO1
Positive Regulation Of Skeletal Muscle Tissue Development (GO:0048643)	1/7	0.241842	0.651577	0	0	4.13632	5.87138	FLOT1
Positive Regulation Of Triglyceride Lipase Activity (GO:0061365)	1/7	0.241842	0.651577	0	0	4.13632	5.87138	NR1H2
Positive Regulation Of Vascular Associated Smooth Muscle Cell Migration (GO:1904754)	1/7	0.241842	0.651577	0	0	4.13632	5.87138	NR4A3
Positive Regulation Of Vascular Endothelial Growth Factor Signaling Pathway (GO:1900748)	1/7	0.241842	0.651577	0	0	4.13632	5.87138	SMOC2
Postsynapse Assembly (GO:0099068)	1/7	0.241842	0.651577	0	0	4.13632	5.87138	NRXN2
Postsynaptic Density Organization (GO:0097106)	1/7	0.241842	0.651577	0	0	4.13632	5.87138	NRXN2
Presynaptic Membrane Organization (GO:0097090)	1/7	0.241842	0.651577	0	0	4.13632	5.87138	IL1RAPL1
Protein Deglycosylation (GO:0006517)	1/7	0.241842	0.651577	0	0	4.13632	5.87138	OGA
Protein Localization To Cytoplasmic Stress Granule (GO:1903608)	1/7	0.241842	0.651577	0	0	4.13632	5.87138	DDX3X
Protein Localization To Nucleolus (GO:1902570)	1/7	0.241842	0.651577	0	0	4.13632	5.87138	RRS1
Protein poly-ADP-ribosylation (GO:0070212)	1/7	0.241842	0.651577	0	0	4.13632	5.87138	PARP10
Protein Retention In ER Lumen (GO:0006621)	1/7	0.241842	0.651577	0	0	4.13632	5.87138	OS9
Purine Nucleotide Catabolic Process (GO:0006195)	1/7	0.241842	0.651577	0	0	4.13632	5.87138	HINT1
Purine-Containing Compound Metabolic Process (GO:0072521)	1/7	0.241842	0.651577	0	0	4.13632	5.87138	FHIT
Regulation Of Fibroblast Proliferation (GO:0048145)	3/44	0.242668	0.651577	0	0	1.8175	2.57368	PARP10;CDK6;CTNNB1
Regulation Of Intrinsic Apoptotic Signaling Pathway (GO:2001242)	3/44	0.242668	0.651577	0	0	1.8175	2.57368	DDX3X;DDIT3;HERPUD1
Epithelial To Mesenchymal Transition (GO:0001837)	3/44	0.242668	0.651577	0	0	1.8175	2.57368	DDX5;TRIM28;CTNNB1
Positive Regulation Of Leukocyte Chemotaxis (GO:0002690)	3/44	0.242668	0.651577	0	0	1.8175	2.57368	SERPINE1;VEGFD;HMGB1
Positive Regulation Of miRNA Metabolic Process (GO:2000630)	3/44	0.242668	0.651577	0	0	1.8175	2.57368	JUN;FOXO3;RELA
Cellular Response To Transforming Growth Factor Beta Stimulus (GO:0071560)	5/87	0.248221	0.651577	0	0	1.51535	2.11154	WWOX;JUN;ANKRD1;TGFBR2;SMAD7
Regulation Of Gene Expression (GO:0010468)	39/897	0.250134	0.651577	0	0	1.13442	1.57203	CEBPB;DDX3X;AHNAK;HDAC10;PHF1;SRSF1;TOB2;CLU;RELA;ACTG1;FLCN;ING2;HINT1;HNRNPDL;DDRGK1;SNRNP70;NOCT;CCNL2;APBB3;PRMT5;PEG3;BRPF3;MSN;PARP10;CLK1;PER1;KAT2A;CDK6;ACTC1;DNAJA4;HGS;DDIT3;RNF207;ZSCAN21;CDK2;UBE2V1;NFE2L2;RBMS3;ZPR1
Regulation Of Plasma Membrane Bounded Cell Projection Organization (GO:0120035)	2/25	0.25267	0.651577	0	0	2.15906	2.97016	IL1RAPL1;EFHC2
Cardiac Muscle Cell Development (GO:0055013)	2/25	0.25267	0.651577	0	0	2.15906	2.97016	MYL2;LRRC10
Regulation Of Protein Transport (GO:0051223)	2/25	0.25267	0.651577	0	0	2.15906	2.97016	RHBDF1;DNAJA1
Secretory Granule Organization (GO:0033363)	2/25	0.25267	0.651577	0	0	2.15906	2.97016	HPS1;AP1S2
Extrinsic Apoptotic Signaling Pathway Via Death Domain Receptors (GO:0008625)	2/25	0.25267	0.651577	0	0	2.15906	2.97016	DDX3X;DIABLO
Synaptic Transmission, Glutamatergic (GO:0035249)	2/25	0.25267	0.651577	0	0	2.15906	2.97016	NAPA;GRIN2D
Homologous Chromosome Pairing At Meiosis (GO:0007129)	2/25	0.25267	0.651577	0	0	2.15906	2.97016	BAG6;SIRT7
Negative Regulation Of Neurogenesis (GO:0050768)	2/25	0.25267	0.651577	0	0	2.15906	2.97016	MBD1;GORASP1
Negative Regulation Of Protein Polymerization (GO:0032272)	2/25	0.25267	0.651577	0	0	2.15906	2.97016	TWF1;PFN1
Positive Regulation Of Interleukin-10 Production (GO:0032733)	2/25	0.25267	0.651577	0	0	2.15906	2.97016	HMGB1;HSPD1
Regulation Of Activated T Cell Proliferation (GO:0046006)	2/25	0.25267	0.651577	0	0	2.15906	2.97016	PRNP;HMGB1
Regulation Of Type II Interferon Production (GO:0032649)	4/66	0.252987	0.651577	0	0	1.60288	2.20303	PRNP;DDIT3;HMGB1;HSPD1
Positive Regulation Of Tumor Necrosis Factor Production (GO:0032760)	4/66	0.252987	0.651577	0	0	1.60288	2.20303	FRMD8;PTPN11;HMGB1;CLU
Regulation Of Cellular Biosynthetic Process (GO:0031326)	4/66	0.252987	0.651577	0	0	1.60288	2.20303	RBM3;NOLC1;FOXO3;PUM3
Positive Regulation Of TOR Signaling (GO:0032008)	3/45	0.253154	0.651577	0	0	1.77412	2.43721	FLCN;PIP4P1;GPR137C
RNA Processing (GO:0006396)	9/178	0.254607	0.651577	0	0	1.32443	1.81187	RBM3;RNASEL;U2AF2;SRSF1;MPHOSPH10;SNRPF;SRSF5;SF3B1;SRSF9
Phosphatidylinositol Biosynthetic Process (GO:0006661)	5/88	0.255557	0.651577	0	0	1.49701	2.04238	DPM1;MTMR14;INPPL1;PIK3R2;IP6K1
Plasma Membrane Bounded Cell Projection Assembly (GO:0120031)	12/248	0.256366	0.651577	0	0	1.26514	1.72204	RAP1B;EHD4;ARL13B;UBXN10;TCTN2;MBD1;TCTN1;CEP164;RFX2;ARFIP2;EMP2;CFAP20
Negative Regulation Of DNA-binding Transcription Factor Activity (GO:0043433)	7/133	0.258039	0.651577	0	0	1.38111	1.87092	NFKBIA;PARP10;PRNP;DDIT3;SETD6;ANXA4;SMAD7
Positive Regulation Of Neurogenesis (GO:0050769)	4/67	0.261563	0.651577	0	0	1.57735	2.11535	IL1RAPL1;CTNNB1;PLXNB2;TGM2
Positive Regulation Of Supramolecular Fiber Organization (GO:1902905)	5/89	0.262945	0.651577	0	0	1.4791	1.9758	SCIN;PFN1;CLU;COLGALT1;LMOD2
Regulation Of Epithelial Cell Migration (GO:0010632)	3/46	0.263702	0.651577	0	0	1.73276	2.30966	EMP2;PFN1;RTN4
RNA Modification (GO:0009451)	3/46	0.263702	0.651577	0	0	1.73276	2.30966	MEPCE;LCMT2;FTSJ3
Rho Protein Signal Transduction (GO:0007266)	3/46	0.263702	0.651577	0	0	1.73276	2.30966	EPS8L1;RHOA;RHOBTB1
Negative Regulation Of Cytokine-Mediated Signaling Pathway (GO:0001960)	3/46	0.263702	0.651577	0	0	1.73276	2.30966	NR1H2;STAT2;GPS2
Positive Regulation Of B Cell Activation (GO:0050871)	3/46	0.263702	0.651577	0	0	1.73276	2.30966	SHLD1;IRS2;TNFSF13B
Heart Development (GO:0007507)	8/157	0.264985	0.651577	0	0	1.33491	1.77287	POPDC2;KAT2A;PDLIM3;TCF25;MYL2;TNNI3;PTPN11;TGFBR2
DNA Synthesis Involved In DNA Repair (GO:0000731)	2/26	0.267229	0.651577	0	0	2.06898	2.73033	PARP10;TNFSF13B
Regulation Of Macrophage Derived Foam Cell Differentiation (GO:0010743)	2/26	0.267229	0.651577	0	0	2.06898	2.73033	NFKBIA;NR1H2
Regulation Of Neuron Migration (GO:2001222)	2/26	0.267229	0.651577	0	0	2.06898	2.73033	PLXNB2;PHACTR1
Regulation Of Vasculature Development (GO:1901342)	2/26	0.267229	0.651577	0	0	2.06898	2.73033	CTNNB1;EMP2
Response To Alcohol (GO:0097305)	2/26	0.267229	0.651577	0	0	2.06898	2.73033	SOD1;TGFBR2
Ventricular Septum Morphogenesis (GO:0060412)	2/26	0.267229	0.651577	0	0	2.06898	2.73033	SMAD7;TGFBR2
Negative Regulation Of Cytoskeleton Organization (GO:0051494)	2/26	0.267229	0.651577	0	0	2.06898	2.73033	TWF1;PFN1
Positive Regulation Of B Cell Proliferation (GO:0030890)	2/26	0.267229	0.651577	0	0	2.06898	2.73033	IRS2;TNFSF13B
Positive Regulation Of Mononuclear Cell Migration (GO:0071677)	2/26	0.267229	0.651577	0	0	2.06898	2.73033	SERPINE1;HMGB1
Protein Insertion Into Mitochondrial Membrane (GO:0051204)	2/26	0.267229	0.651577	0	0	2.06898	2.73033	HSP90AA1;TIMM10
Regulation Of Small GTPase Mediated Signal Transduction (GO:0051056)	6/112	0.267855	0.651577	0	0	1.40677	1.85316	FLCN;PLEKHG1;ARHGAP18;RHOF;SQSTM1;TGM2
Cilium Organization (GO:0044782)	10/204	0.268755	0.651577	0	0	1.28194	1.68442	CFAP61;EHD4;ARL13B;UBXN10;TCTN2;MBD1;TCTN1;CEP164;RFX2;CFAP20
Positive Regulation Of NF-kappaB Transcription Factor Activity (GO:0051092)	7/135	0.270013	0.651577	0	0	1.35938	1.77981	EDA;DDRGK1;FLOT1;UBE2V1;CLU;PPIA;RELA
Negative Regulation Of Cellular Component Organization (GO:0051129)	4/68	0.270192	0.651577	0	0	1.55261	2.03178	DDX3X;DNAJA4;CLU;CRYAB
Negative Regulation Of Supramolecular Fiber Organization (GO:1902904)	4/68	0.270192	0.651577	0	0	1.55261	2.03178	TWF1;PFN1;CLU;CRYAB
Positive Regulation Of Secretion By Cell (GO:1903532)	4/68	0.270192	0.651577	0	0	1.55261	2.03178	ANKRD1;PPIA;APBB3;PPID
Cdc42 Protein Signal Transduction (GO:0032488)	1/8	0.27125	0.651577	0	0	3.54521	4.62548	RHOBTB1
Regulation Of Endothelial Cell Differentiation (GO:0045601)	1/8	0.27125	0.651577	0	0	3.54521	4.62548	TMEM100
Regulation Of Epithelial Cell Apoptotic Process (GO:1904035)	1/8	0.27125	0.651577	0	0	3.54521	4.62548	ZFP36
Golgi Lumen Acidification (GO:0061795)	1/8	0.27125	0.651577	0	0	3.54521	4.62548	ATP6V0C
Golgi Ribbon Formation (GO:0090161)	1/8	0.27125	0.651577	0	0	3.54521	4.62548	PRMT5
RISC Complex Assembly (GO:0070922)	1/8	0.27125	0.651577	0	0	3.54521	4.62548	TARBP2
RNA Secondary Structure Unwinding (GO:0010501)	1/8	0.27125	0.651577	0	0	3.54521	4.62548	DDX3X
SRP-dependent Cotranslational Protein Targeting To Membrane (GO:0006614)	1/8	0.27125	0.651577	0	0	3.54521	4.62548	ZFAND2B
T-helper 1 Type Immune Response (GO:0042088)	1/8	0.27125	0.651577	0	0	3.54521	4.62548	HMGB1
T-helper 17 Cell Differentiation (GO:0072539)	1/8	0.27125	0.651577	0	0	3.54521	4.62548	RORC
Regulation Of Intrinsic Apoptotic Signaling Pathway By P53 Class Mediator (GO:1902253)	1/8	0.27125	0.651577	0	0	3.54521	4.62548	EIF5A
Regulation Of Mast Cell Activation Involved In Immune Response (GO:0033006)	1/8	0.27125	0.651577	0	0	3.54521	4.62548	STXBP2
Amino Sugar Metabolic Process (GO:0006040)	1/8	0.27125	0.651577	0	0	3.54521	4.62548	ST3GAL1
Amyloid-Beta Formation (GO:0034205)	1/8	0.27125	0.651577	0	0	3.54521	4.62548	APH1A
Regulation Of Mitotic Sister Chromatid Segregation (GO:0033047)	1/8	0.27125	0.651577	0	0	3.54521	4.62548	DUSP1
Regulation Of Myeloid Leukocyte Mediated Immunity (GO:0002886)	1/8	0.27125	0.651577	0	0	3.54521	4.62548	STXBP2
Regulation Of Necrotic Cell Death (GO:0010939)	1/8	0.27125	0.651577	0	0	3.54521	4.62548	SLC6A6
Regulation Of Nephron Tubule Epithelial Cell Differentiation (GO:0072182)	1/8	0.27125	0.651577	0	0	3.54521	4.62548	CTNNB1
Regulation Of Pattern Recognition Receptor Signaling Pathway (GO:0062207)	1/8	0.27125	0.651577	0	0	3.54521	4.62548	FLOT1
Regulation Of Pinocytosis (GO:0048548)	1/8	0.27125	0.651577	0	0	3.54521	4.62548	NR1H2
Regulation Of Podosome Assembly (GO:0071801)	1/8	0.27125	0.651577	0	0	3.54521	4.62548	KIF9
Regulation Of Protein Localization To Early Endosome (GO:1902965)	1/8	0.27125	0.651577	0	0	3.54521	4.62548	MSN
Cellular Response To UV-A (GO:0071492)	1/8	0.27125	0.651577	0	0	3.54521	4.62548	PPID
Regulation Of Sister Chromatid Cohesion (GO:0007063)	1/8	0.27125	0.651577	0	0	3.54521	4.62548	CTNNB1
Regulation Of Skeletal Muscle Cell Differentiation (GO:2001014)	1/8	0.27125	0.651577	0	0	3.54521	4.62548	DDX5
Cellular Response To Copper Ion (GO:0071280)	1/8	0.27125	0.651577	0	0	3.54521	4.62548	PRNP
Cellular Response To Hydroxyurea (GO:0072711)	1/8	0.27125	0.651577	0	0	3.54521	4.62548	SPIDR
Regulation Of Toll-Like Receptor 3 Signaling Pathway (GO:0034139)	1/8	0.27125	0.651577	0	0	3.54521	4.62548	FLOT1
Regulation Of Transmembrane Transporter Activity (GO:0022898)	1/8	0.27125	0.651577	0	0	3.54521	4.62548	ACTB
Regulation Of Tumor Necrosis Factor Superfamily Cytokine Production (GO:1903555)	1/8	0.27125	0.651577	0	0	3.54521	4.62548	ZFP36
Cellular Response To Sterol Depletion (GO:0071501)	1/8	0.27125	0.651577	0	0	3.54521	4.62548	SREBF2
Response To Leptin (GO:0044321)	1/8	0.27125	0.651577	0	0	3.54521	4.62548	NR4A3
Response To Misfolded Protein (GO:0051788)	1/8	0.27125	0.651577	0	0	3.54521	4.62548	CLU
Semaphorin-Plexin Signaling Pathway Involved In Axon Guidance (GO:1902287)	1/8	0.27125	0.651577	0	0	3.54521	4.62548	PLXNB2
Endochondral Ossification (GO:0001958)	1/8	0.27125	0.651577	0	0	3.54521	4.62548	INPPL1
Excitatory Synapse Assembly (GO:1904861)	1/8	0.27125	0.651577	0	0	3.54521	4.62548	PLXNB2
Sympathetic Ganglion Development (GO:0061549)	1/8	0.27125	0.651577	0	0	3.54521	4.62548	CTNNB1
Fructose 1,6-Bisphosphate Metabolic Process (GO:0030388)	1/8	0.27125	0.651577	0	0	3.54521	4.62548	PFKL
Fructose 6-Phosphate Metabolic Process (GO:0006002)	1/8	0.27125	0.651577	0	0	3.54521	4.62548	PFKL
Tetrahydrofolate Interconversion (GO:0035999)	1/8	0.27125	0.651577	0	0	3.54521	4.62548	SHMT1
Glucan Metabolic Process (GO:0044042)	1/8	0.27125	0.651577	0	0	3.54521	4.62548	PHKG2
Type B Pancreatic Cell Differentiation (GO:0003309)	1/8	0.27125	0.651577	0	0	3.54521	4.62548	CDK6
Ubiquitin-Dependent Protein Catabolic Process Via The C-end Degron Rule Pathway (GO:0140627)	1/8	0.27125	0.651577	0	0	3.54521	4.62548	KLHDC3
Granulocyte Migration (GO:0097530)	1/8	0.27125	0.651577	0	0	3.54521	4.62548	EMP2
Homocysteine Metabolic Process (GO:0050667)	1/8	0.27125	0.651577	0	0	3.54521	4.62548	CTH
Homologous Recombination (GO:0035825)	1/8	0.27125	0.651577	0	0	3.54521	4.62548	HDAC10
Induction Of Positive Chemotaxis (GO:0050930)	1/8	0.27125	0.651577	0	0	3.54521	4.62548	VEGFD
Internal Protein Amino Acid Acetylation (GO:0006475)	1/8	0.27125	0.651577	0	0	3.54521	4.62548	KAT2A
Isoprenoid Biosynthetic Process (GO:0008299)	1/8	0.27125	0.651577	0	0	3.54521	4.62548	MVD
Isoprenoid Metabolic Process (GO:0006720)	1/8	0.27125	0.651577	0	0	3.54521	4.62548	MVD
Killing By Host Of Symbiont Cells (GO:0051873)	1/8	0.27125	0.651577	0	0	3.54521	4.62548	GAPDH
Kinetochore Assembly (GO:0051382)	1/8	0.27125	0.651577	0	0	3.54521	4.62548	CENPF
Mast Cell Mediated Immunity (GO:0002448)	1/8	0.27125	0.651577	0	0	3.54521	4.62548	NR4A3
Membrane Lipid Catabolic Process (GO:0046466)	1/8	0.27125	0.651577	0	0	3.54521	4.62548	SMPD2
Muscle Cell Fate Commitment (GO:0042693)	1/8	0.27125	0.651577	0	0	3.54521	4.62548	MYL2
ncRNA Export From Nucleus (GO:0097064)	1/8	0.27125	0.651577	0	0	3.54521	4.62548	PHAX
Negative Regulation Of CD4-positive, Alpha-Beta T Cell Activation (GO:2000515)	1/8	0.27125	0.651577	0	0	3.54521	4.62548	HMGB1
Negative Regulation Of Alpha-Beta T Cell Differentiation (GO:0046639)	1/8	0.27125	0.651577	0	0	3.54521	4.62548	HMGB1
Negative Regulation Of Cell Division (GO:0051782)	1/8	0.27125	0.651577	0	0	3.54521	4.62548	TXNIP
Negative Regulation Of Glycoprotein Biosynthetic Process (GO:0010561)	1/8	0.27125	0.651577	0	0	3.54521	4.62548	ITM2B
Negative Regulation Of Interleukin-17 Production (GO:0032700)	1/8	0.27125	0.651577	0	0	3.54521	4.62548	PRNP
Negative Regulation Of Leukocyte Apoptotic Process (GO:2000107)	1/8	0.27125	0.651577	0	0	3.54521	4.62548	MERTK
Negative Regulation Of Lymphocyte Apoptotic Process (GO:0070229)	1/8	0.27125	0.651577	0	0	3.54521	4.62548	IRS2
Negative Regulation Of Oxidoreductase Activity (GO:0051354)	1/8	0.27125	0.651577	0	0	3.54521	4.62548	ETFBKMT
Negative Regulation Of Pathway-Restricted SMAD Protein Phosphorylation (GO:0060394)	1/8	0.27125	0.651577	0	0	3.54521	4.62548	SMAD7
Negative Regulation Of Retrograde Protein Transport, ER To Cytosol (GO:1904153)	1/8	0.27125	0.651577	0	0	3.54521	4.62548	OS9
Negative Regulation Of Transcription By Competitive Promoter Binding (GO:0010944)	1/8	0.27125	0.651577	0	0	3.54521	4.62548	SMAD7
Negative Regulation Of Vascular Endothelial Growth Factor Receptor Signaling Pathway (GO:0030948)	1/8	0.27125	0.651577	0	0	3.54521	4.62548	HGS
Neuron Projection Maintenance (GO:1990535)	1/8	0.27125	0.651577	0	0	3.54521	4.62548	PRNP
Neuronal Ion Channel Clustering (GO:0045161)	1/8	0.27125	0.651577	0	0	3.54521	4.62548	SPTBN4
Nicotinamide Nucleotide Biosynthetic Process (GO:0019359)	1/8	0.27125	0.651577	0	0	3.54521	4.62548	NAMPT
Oligosaccharide Catabolic Process (GO:0009313)	1/8	0.27125	0.651577	0	0	3.54521	4.62548	MAN2C1
Peptidyl-Lysine Monomethylation (GO:0018026)	1/8	0.27125	0.651577	0	0	3.54521	4.62548	SETD6
Peroxisomal Transport (GO:0043574)	1/8	0.27125	0.651577	0	0	3.54521	4.62548	PEX6
Peroxisome Fission (GO:0016559)	1/8	0.27125	0.651577	0	0	3.54521	4.62548	PEX11B
Phosphatidylglycerol Biosynthetic Process (GO:0006655)	1/8	0.27125	0.651577	0	0	3.54521	4.62548	PLSCR3
Phototransduction, Visible Light (GO:0007603)	1/8	0.27125	0.651577	0	0	3.54521	4.62548	RP1
Positive Regulation Of CD4-positive, Alpha-Beta T Cell Activation (GO:2000516)	1/8	0.27125	0.651577	0	0	3.54521	4.62548	TGFBR2
Positive Regulation Of Autophagy Of Mitochondrion (GO:1903599)	1/8	0.27125	0.651577	0	0	3.54521	4.62548	SLC25A4
Positive Regulation Of Cellular Respiration (GO:1901857)	1/8	0.27125	0.651577	0	0	3.54521	4.62548	ISCU
Positive Regulation Of Fatty Acid Beta-Oxidation (GO:0032000)	1/8	0.27125	0.651577	0	0	3.54521	4.62548	IRS2
Positive Regulation Of Mitochondrial Calcium Ion Concentration (GO:0051561)	1/8	0.27125	0.651577	0	0	3.54521	4.62548	TGM2
Positive Regulation Of Mitochondrial Membrane Permeability (GO:0035794)	1/8	0.27125	0.651577	0	0	3.54521	4.62548	CHCHD10
Positive Regulation Of Mitochondrial Outer Membrane Permeabilization Involved In Apoptotic Signaling Pathway (GO:1901030)	1/8	0.27125	0.651577	0	0	3.54521	4.62548	CHCHD10
Positive Regulation Of Protein Localization To Early Endosome (GO:1902966)	1/8	0.27125	0.651577	0	0	3.54521	4.62548	MSN
Positive Regulation Of Protein Localization To Endosome (GO:1905668)	1/8	0.27125	0.651577	0	0	3.54521	4.62548	MSN
Protein Hexamerization (GO:0034214)	1/8	0.27125	0.651577	0	0	3.54521	4.62548	LRRC8A
Purine Nucleobase Metabolic Process (GO:0006144)	1/8	0.27125	0.651577	0	0	3.54521	4.62548	SHMT1
Regulation Of DNA-templated Transcription Initiation (GO:2000142)	1/8	0.27125	0.651577	0	0	3.54521	4.62548	JUN
Regulation Of Actin Filament Length (GO:0030832)	1/8	0.27125	0.651577	0	0	3.54521	4.62548	NAA80
Regulation Of Calcium Ion Import Across Plasma Membrane (GO:1905664)	1/8	0.27125	0.651577	0	0	3.54521	4.62548	PRNP
Positive Regulation Of Cell Population Proliferation (GO:0008284)	19/419	0.273528	0.651577	0	0	1.18257	1.53302	RPS9;SHC1;COX17;NME2;EMP2;IRS2;VEGFD;ACTB;RELA;GNAI2;TGFBR2;CDK6;NR4A3;CAPNS1;DDRGK1;NAMPT;CDK2;MVD;SLC25A33
Cellular Response To Alcohol (GO:0097306)	3/47	0.274304	0.651577	0	0	1.69328	2.19029	GRAMD1A;CTNNB1;SPIDR
Cellular Response To Type II Interferon (GO:0071346)	3/47	0.274304	0.651577	0	0	1.69328	2.19029	GBP6;AQP4;GAPDH
Dicarboxylic Acid Metabolic Process (GO:0043648)	3/47	0.274304	0.651577	0	0	1.69328	2.19029	SHMT1;IDH2;GCLM
mRNA Stabilization (GO:0048255)	3/47	0.274304	0.651577	0	0	1.69328	2.19029	ZFP36;NOCT;TENT5A
Regulation Of Intracellular Signal Transduction (GO:1902531)	13/276	0.275238	0.651577	0	0	1.22971	1.58647	PRMT5;PLEKHG1;USP2;ARHGAP18;URB2;RHOF;RELA;NFKBIA;FLCN;PIP4P1;RRS1;UBE2V1;SQSTM1
Negative Regulation Of Blood Vessel Morphogenesis (GO:2000181)	4/69	0.278871	0.651577	0	0	1.52864	1.95208	NPPB;HGS;PGK1;CTNNB1
Negative Regulation Of Cell Adhesion (GO:0007162)	4/69	0.278871	0.651577	0	0	1.52864	1.95208	DUSP1;SERPINE1;PLXNB2;RHOA
Organonitrogen Compound Catabolic Process (GO:1901565)	4/69	0.278871	0.651577	0	0	1.52864	1.95208	SMPD2;ETFB;USE1;SQSTM1
Positive Regulation Of Endocytosis (GO:0045807)	4/69	0.278871	0.651577	0	0	1.52864	1.95208	SERPINE1;FLOT1;MERTK;CLU
Positive Regulation Of Endothelial Cell Proliferation (GO:0001938)	4/69	0.278871	0.651577	0	0	1.52864	1.95208	NR4A1;EGFL7;VEGFD;HMGB1
Proteolysis Involved In Protein Catabolic Process (GO:0051603)	4/69	0.278871	0.651577	0	0	1.52864	1.95208	BAG6;LONP1;CTSF;UBA52
JNK Cascade (GO:0007254)	2/27	0.281783	0.651577	0	0	1.98611	2.51564	GPS2;MAP2K7
Regulation Of Glucose Metabolic Process (GO:0010906)	2/27	0.281783	0.651577	0	0	1.98611	2.51564	RORC;IRS2
RNA-mediated Gene Silencing (GO:0031047)	2/27	0.281783	0.651577	0	0	1.98611	2.51564	EXD1;TARBP2
acyl-CoA Metabolic Process (GO:0006637)	2/27	0.281783	0.651577	0	0	1.98611	2.51564	ACSM5;HMGCS2
Artery Morphogenesis (GO:0048844)	2/27	0.281783	0.651577	0	0	1.98611	2.51564	SMAD7;TGFBR2
Carboxylic Acid Metabolic Process (GO:0019752)	2/27	0.281783	0.651577	0	0	1.98611	2.51564	GSTO1;ST3GAL1
Regulation Of Protein Targeting To Membrane (GO:0090313)	2/27	0.281783	0.651577	0	0	1.98611	2.51564	PRNP;MIEF2
Establishment Of Endothelial Barrier (GO:0061028)	2/27	0.281783	0.651577	0	0	1.98611	2.51564	RAP1B;MSN
Positive Regulation Of Interleukin-12 Production (GO:0032735)	2/27	0.281783	0.651577	0	0	1.98611	2.51564	HMGB1;HSPD1
Protein Quality Control For Misfolded Or Incompletely Synthesized Proteins (GO:0006515)	2/27	0.281783	0.651577	0	0	1.98611	2.51564	BAG6;LONP1
Cardiac Muscle Tissue Development (GO:0048738)	3/48	0.284947	0.651577	0	0	1.65556	2.07847	NPPB;NPPA;ANKRD1
Ribosomal Large Subunit Biogenesis (GO:0042273)	3/48	0.284947	0.651577	0	0	1.65556	2.07847	TRAF7;RRS1;SDAD1
Transcription Preinitiation Complex Assembly (GO:0070897)	3/48	0.284947	0.651577	0	0	1.65556	2.07847	TAF13;MED20;POLR1E
Negative Regulation Of Viral Process (GO:0048525)	3/48	0.284947	0.651577	0	0	1.65556	2.07847	ZFP36;RNASEL;PPIA
Purine Ribonucleotide Biosynthetic Process (GO:0009152)	3/48	0.284947	0.651577	0	0	1.65556	2.07847	NPPB;NPPA;ALDOA
Positive Regulation Of Tumor Necrosis Factor Superfamily Cytokine Production (GO:1903557)	4/70	0.287593	0.651577	0	0	1.50539	1.87603	FRMD8;PTPN11;HMGB1;CLU
Negative Regulation Of Cell Growth (GO:0030308)	6/115	0.287889	0.651577	0	0	1.36781	1.70318	NPPB;TCHP;FLCN;DDX3X;MYL2;RTN4
Negative Regulation Of Programmed Cell Death (GO:0043069)	16/351	0.288568	0.651577	0	0	1.18839	1.47695	HSPA9;DDX3X;GPX4;SHC1;SIAH2;ANXA4;NME2;RELA;HYPK;HSPD1;DNAJA1;DDRGK1;FKBP8;CTNNB1;PIM3;CRYAB
Organelle Organization (GO:0006996)	17/376	0.291963	0.651577	0	0	1.17831	1.45065	CFAP61;SAR1A;PEX11B;CHCHD10;MIEF2;TOR1B;KIF9;CHCHD2;DES;GORASP1;PEX6;VPS11;LONP1;MTFR2;SLC25A33;PPIA;PPID
Protein Localization (GO:0008104)	15/328	0.292587	0.651577	0	0	1.19222	1.46522	NAPA;HSPA9;SAR1A;STK11IP;STXBP2;EMP2;WDR45;ACTB;GGA1;HOOK2;HGS;RAB24;ARFIP2;CTNNB1;SQSTM1
Negative Regulation Of Protein Phosphorylation (GO:0001933)	7/139	0.294382	0.651577	0	0	1.31787	1.6116	PRNP;CAMK2N1;MVP;FKBP8;PPIA;TARBP2;SMAD7
Regulation Of Lipid Metabolic Process (GO:0019216)	3/49	0.295624	0.651577	0	0	1.61947	1.9736	RORC;GPS2;IRS2
Negative Regulation Of TOR Signaling (GO:0032007)	3/49	0.295624	0.651577	0	0	1.61947	1.9736	FLCN;CASTOR2;RNF152
Positive Regulation Of NIK/NF-kappaB Signaling (GO:1901224)	3/49	0.295624	0.651577	0	0	1.61947	1.9736	DDX3X;RHOA;RELA
Positive Regulation Of Actin Filament Bundle Assembly (GO:0032233)	3/49	0.295624	0.651577	0	0	1.61947	1.9736	CCN2;PFN1;RHOA
Regulation Of Cell Development (GO:0060284)	3/49	0.295624	0.651577	0	0	1.61947	1.9736	PER2;BRPF3;CTNNB1
Regulation Of Defense Response To Virus By Host (GO:0050691)	2/28	0.296313	0.651577	0	0	1.90961	2.32273	HSP90AA1;TARBP2
RNA Biosynthetic Process (GO:0032774)	2/28	0.296313	0.651577	0	0	1.90961	2.32273	PRMT5;TAF13
Regulation Of Muscle Contraction (GO:0006937)	2/28	0.296313	0.651577	0	0	1.90961	2.32273	MYL2;MYL3
Membrane Fusion (GO:0061025)	2/28	0.296313	0.651577	0	0	1.90961	2.32273	NAPA;VAMP3
Negative Regulation Of Axon Extension (GO:0030517)	2/28	0.296313	0.651577	0	0	1.90961	2.32273	SEMA3B;RTN4
Phospholipid Translocation (GO:0045332)	2/28	0.296313	0.651577	0	0	1.90961	2.32273	PLSCR3;PLSCR4
Positive Regulation Of Immunoglobulin Production (GO:0002639)	2/28	0.296313	0.651577	0	0	1.90961	2.32273	SHLD1;VAMP3
Positive Regulation Of Synapse Assembly (GO:0051965)	2/28	0.296313	0.651577	0	0	1.90961	2.32273	CLSTN2;IL1RAPL1
Protein Acetylation (GO:0006473)	2/28	0.296313	0.651577	0	0	1.90961	2.32273	NAA60;NAA80
Cellular Response To Hypoxia (GO:0071456)	4/71	0.296353	0.651577	0	0	1.48283	1.80343	CPEB1;EGLN2;PGK1;NDRG1
Negative Regulation Of Phosphorylation (GO:0042326)	4/71	0.296353	0.651577	0	0	1.48283	1.80343	PRNP;FKBP8;IRS2;PPIA
Positive Regulation Of Synaptic Transmission (GO:0050806)	4/71	0.296353	0.651577	0	0	1.48283	1.80343	CLSTN2;FLOT1;SQSTM1;GRIN2D
Regulation Of Cellular Response To Oxidative Stress (GO:1900407)	1/9	0.299519	0.651577	0	0	3.10188	3.73955	NFE2L2
ER-associated Misfolded Protein Catabolic Process (GO:0071712)	1/9	0.299519	0.651577	0	0	3.10188	3.73955	BAG6
Regulation Of Flagellated Sperm Motility (GO:1901317)	1/9	0.299519	0.651577	0	0	3.10188	3.73955	KIF9
NAD Biosynthesis Via Nicotinamide Riboside Salvage Pathway (GO:0034356)	1/9	0.299519	0.651577	0	0	3.10188	3.73955	PARP10
Regulation Of Hair Cycle (GO:0042634)	1/9	0.299519	0.651577	0	0	3.10188	3.73955	PER1
Regulation Of High Voltage-Gated Calcium Channel Activity (GO:1901841)	1/9	0.299519	0.651577	0	0	3.10188	3.73955	NPPA
Rap Protein Signal Transduction (GO:0032486)	1/9	0.299519	0.651577	0	0	3.10188	3.73955	RAP1B
Regulation Of Histone Methylation (GO:0031060)	1/9	0.299519	0.651577	0	0	3.10188	3.73955	RRP8
SNARE Complex Assembly (GO:0035493)	1/9	0.299519	0.651577	0	0	3.10188	3.73955	VAMP3
Acidic Amino Acid Transport (GO:0015800)	1/9	0.299519	0.651577	0	0	3.10188	3.73955	SLC6A6
Regulation Of Lipid Transport (GO:0032368)	1/9	0.299519	0.651577	0	0	3.10188	3.73955	NR1H2
Adult Locomotory Behavior (GO:0008344)	1/9	0.299519	0.651577	0	0	3.10188	3.73955	SPTBN4
Aspartate Transmembrane Transport (GO:0015810)	1/9	0.299519	0.651577	0	0	3.10188	3.73955	SLC25A18
Autophagy Of Peroxisome (GO:0030242)	1/9	0.299519	0.651577	0	0	3.10188	3.73955	SQSTM1
Regulation Of Protein Acetylation (GO:1901983)	1/9	0.299519	0.651577	0	0	3.10188	3.73955	DDX3X
Regulation Of Sensory Perception (GO:0051931)	1/9	0.299519	0.651577	0	0	3.10188	3.73955	TMEM100
Cellular Response To Fatty Acid (GO:0071398)	1/9	0.299519	0.651577	0	0	3.10188	3.73955	DGAT2
Regulation Of Triglyceride Catabolic Process (GO:0010896)	1/9	0.299519	0.651577	0	0	3.10188	3.73955	PNPLA2
Cellular Response To Purine-Containing Compound (GO:0071415)	1/9	0.299519	0.651577	0	0	3.10188	3.73955	CLU
Chloride Ion Homeostasis (GO:0055064)	1/9	0.299519	0.651577	0	0	3.10188	3.73955	SLC12A9
Renal Water Homeostasis (GO:0003091)	1/9	0.299519	0.651577	0	0	3.10188	3.73955	AQP4
Cranial Nerve Development (GO:0021545)	1/9	0.299519	0.651577	0	0	3.10188	3.73955	TMEM126A
Response To Hydroxyurea (GO:0072710)	1/9	0.299519	0.651577	0	0	3.10188	3.73955	SPIDR
Response To Nitric Oxide (GO:0071731)	1/9	0.299519	0.651577	0	0	3.10188	3.73955	CDK2
Dopamine Transport (GO:0015872)	1/9	0.299519	0.651577	0	0	3.10188	3.73955	TGM2
Serine Family Amino Acid Catabolic Process (GO:0009071)	1/9	0.299519	0.651577	0	0	3.10188	3.73955	SHMT1
Signal Release (GO:0023061)	1/9	0.299519	0.651577	0	0	3.10188	3.73955	TGM2
sno(s)RNA 3'-End Processing (GO:0031126)	1/9	0.299519	0.651577	0	0	3.10188	3.73955	FBL
Fatty Acid Homeostasis (GO:0055089)	1/9	0.299519	0.651577	0	0	3.10188	3.73955	DGAT2
Fibrinolysis (GO:0042730)	1/9	0.299519	0.651577	0	0	3.10188	3.73955	SERPINE1
Vacuole Fusion (GO:0097576)	1/9	0.299519	0.651577	0	0	3.10188	3.73955	VPS16
Isotype Switching (GO:0045190)	1/9	0.299519	0.651577	0	0	3.10188	3.73955	HSPD1
Kinetochore Organization (GO:0051383)	1/9	0.299519	0.651577	0	0	3.10188	3.73955	CENPF
Maintenance Of Synapse Structure (GO:0099558)	1/9	0.299519	0.651577	0	0	3.10188	3.73955	CHCHD10
Microtubule Anchoring (GO:0034453)	1/9	0.299519	0.651577	0	0	3.10188	3.73955	MBD1
Monoatomic Anion Homeostasis (GO:0055081)	1/9	0.299519	0.651577	0	0	3.10188	3.73955	SLC12A9
Myeloid Dendritic Cell Differentiation (GO:0043011)	1/9	0.299519	0.651577	0	0	3.10188	3.73955	TGFBR2
Negative Regulation Of Activated T Cell Proliferation (GO:0046007)	1/9	0.299519	0.651577	0	0	3.10188	3.73955	PRNP
Negative Regulation Of Adenylate Cyclase Activity (GO:0007194)	1/9	0.299519	0.651577	0	0	3.10188	3.73955	GNAI2
Negative Regulation Of Autophagosome Assembly (GO:1902902)	1/9	0.299519	0.651577	0	0	3.10188	3.73955	PHF23
Negative Regulation Of Cell Adhesion Mediated By Integrin (GO:0033629)	1/9	0.299519	0.651577	0	0	3.10188	3.73955	SERPINE1
Negative Regulation Of Centrosome Duplication (GO:0010826)	1/9	0.299519	0.651577	0	0	3.10188	3.73955	KAT2A
Negative Regulation Of Cholesterol Transport (GO:0032375)	1/9	0.299519	0.651577	0	0	3.10188	3.73955	SREBF2
Negative Regulation Of Establishment Of Protein Localization (GO:1904950)	1/9	0.299519	0.651577	0	0	3.10188	3.73955	DNAJA1
Negative Regulation Of Exocytosis (GO:0045920)	1/9	0.299519	0.651577	0	0	3.10188	3.73955	IL1RAPL1
Negative Regulation Of Glycolytic Process (GO:0045820)	1/9	0.299519	0.651577	0	0	3.10188	3.73955	FLCN
Negative Regulation Of Heart Contraction (GO:0045822)	1/9	0.299519	0.651577	0	0	3.10188	3.73955	SPTBN4
Negative Regulation Of Hydrogen Peroxide-Induced Cell Death (GO:1903206)	1/9	0.299519	0.651577	0	0	3.10188	3.73955	NFE2L2
Negative Regulation Of Intracellular Estrogen Receptor Signaling Pathway (GO:0033147)	1/9	0.299519	0.651577	0	0	3.10188	3.73955	VPS11
Negative Regulation Of Leukocyte Chemotaxis (GO:0002689)	1/9	0.299519	0.651577	0	0	3.10188	3.73955	DUSP1
Negative Regulation Of Mitochondrial Membrane Permeability (GO:0035795)	1/9	0.299519	0.651577	0	0	3.10188	3.73955	SLC25A4
Negative Regulation Of Mitochondrial Outer Membrane Permeabilization Involved In Apoptotic Signaling Pathway (GO:1901029)	1/9	0.299519	0.651577	0	0	3.10188	3.73955	SLC25A4
Negative Regulation Of Necroptotic Process (GO:0060546)	1/9	0.299519	0.651577	0	0	3.10188	3.73955	SLC25A4
Negative Regulation Of Programmed Necrotic Cell Death (GO:0062099)	1/9	0.299519	0.651577	0	0	3.10188	3.73955	SLC25A4
Negative Regulation Of Protein Autophosphorylation (GO:0031953)	1/9	0.299519	0.651577	0	0	3.10188	3.73955	MVP
Negative Regulation Of Protein Exit From Endoplasmic Reticulum (GO:0070862)	1/9	0.299519	0.651577	0	0	3.10188	3.73955	OS9
Negative Regulation Of Secretion (GO:0051048)	1/9	0.299519	0.651577	0	0	3.10188	3.73955	VAMP3
Negative Regulation Of Transmembrane Transport (GO:0034763)	1/9	0.299519	0.651577	0	0	3.10188	3.73955	IRS2
Nuclear Pore Complex Assembly (GO:0051292)	1/9	0.299519	0.651577	0	0	3.10188	3.73955	RTN4
Nucleotide-Binding Oligomerization Domain Containing Signaling Pathway (GO:0070423)	1/9	0.299519	0.651577	0	0	3.10188	3.73955	RELA
Peptidyl-Lysine Acetylation (GO:0018394)	1/9	0.299519	0.651577	0	0	3.10188	3.73955	KAT2A
Phosphatidylethanolamine Biosynthetic Process (GO:0006646)	1/9	0.299519	0.651577	0	0	3.10188	3.73955	CHKB
Positive Regulation Of MHC Class II Biosynthetic Process (GO:0045348)	1/9	0.299519	0.651577	0	0	3.10188	3.73955	RFXANK
Positive Regulation Of Cholesterol Metabolic Process (GO:0090205)	1/9	0.299519	0.651577	0	0	3.10188	3.73955	SREBF2
Positive Regulation Of Chondrocyte Differentiation (GO:0032332)	1/9	0.299519	0.651577	0	0	3.10188	3.73955	ZBTB16
Positive Regulation Of Establishment Of Protein Localization To Telomere (GO:1904851)	1/9	0.299519	0.651577	0	0	3.10188	3.73955	CCT6A
Positive Regulation Of Integrin Activation (GO:0033625)	1/9	0.299519	0.651577	0	0	3.10188	3.73955	RAP1B
Positive Regulation Of Keratinocyte Differentiation (GO:0045618)	1/9	0.299519	0.651577	0	0	3.10188	3.73955	NME2
Positive Regulation Of Lipase Activity (GO:0060193)	1/9	0.299519	0.651577	0	0	3.10188	3.73955	RHOA
Positive Regulation Of mRNA 3'-End Processing (GO:0031442)	1/9	0.299519	0.651577	0	0	3.10188	3.73955	CPEB1
Positive Regulation Of Mesenchymal Cell Proliferation (GO:0002053)	1/9	0.299519	0.651577	0	0	3.10188	3.73955	TGFBR2
Positive Regulation Of miRNA-mediated Gene Silencing (GO:2000637)	1/9	0.299519	0.651577	0	0	3.10188	3.73955	ZFP36
Positive Regulation Of Myoblast Fusion (GO:1901741)	1/9	0.299519	0.651577	0	0	3.10188	3.73955	FLOT1
Positive Regulation Of Non-Canonical Wnt Signaling Pathway (GO:2000052)	1/9	0.299519	0.651577	0	0	3.10188	3.73955	CSNK1E
Positive Regulation Of Platelet Aggregation (GO:1901731)	1/9	0.299519	0.651577	0	0	3.10188	3.73955	MFSD2B
Positive Regulation Of Protein Acetylation (GO:1901985)	1/9	0.299519	0.651577	0	0	3.10188	3.73955	DDX3X
Positive Regulation Of rRNA Processing (GO:2000234)	1/9	0.299519	0.651577	0	0	3.10188	3.73955	SIRT7
Positive Regulation Of Receptor Recycling (GO:0001921)	1/9	0.299519	0.651577	0	0	3.10188	3.73955	VAMP3
Positive Regulation Of Tissue Remodeling (GO:0034105)	1/9	0.299519	0.651577	0	0	3.10188	3.73955	TMBIM1
Positive Regulation Of Vasculogenesis (GO:2001214)	1/9	0.299519	0.651577	0	0	3.10188	3.73955	TMEM100
Prostanoid Metabolic Process (GO:0006692)	1/9	0.299519	0.651577	0	0	3.10188	3.73955	GSTM1
Protein Kinase C Signaling (GO:0070528)	1/9	0.299519	0.651577	0	0	3.10188	3.73955	FLOT1
Protein Localization To Microtubule (GO:0035372)	1/9	0.299519	0.651577	0	0	3.10188	3.73955	CRIPT
Protein Localization To Microtubule Cytoskeleton (GO:0072698)	1/9	0.299519	0.651577	0	0	3.10188	3.73955	CRIPT
Regulation Of CD4-positive, Alpha-Beta T Cell Differentiation (GO:0043370)	1/9	0.299519	0.651577	0	0	3.10188	3.73955	HMGB1
Positive Regulation Of Vasculature Development (GO:1904018)	5/94	0.300537	0.653303	0	0	1.39559	1.67776	SMOC2;HSPB6;SERPINE1;EMP2;VEGFD
Protein Dephosphorylation (GO:0006470)	6/117	0.301417	0.654185	0	0	1.34301	1.61062	DUSP5;DUSP1;PTPN11;DUSP18;TNS2;DUSP7
Cellular Response To Lipid (GO:0071396)	9/187	0.301524	0.654185	0	0	1.2568	1.50679	ZFP36;CD80;SERPINE1;ANKRD1;RORC;MSN;HMGB1;RHOA;RELA
Regulation Of Cysteine-Type Endopeptidase Activity Involved In Apoptotic Process (GO:0043281)	4/72	0.305145	0.654185	0	0	1.46094	1.73409	DDX3X;SIAH2;HMGB1;CTSD
Regulation Of mRNA Stability (GO:0043488)	4/72	0.305145	0.654185	0	0	1.46094	1.73409	ZFP36;PCBP4;NOCT;TENT5A
Cellular Response To Decreased Oxygen Levels (GO:0036294)	4/72	0.305145	0.654185	0	0	1.46094	1.73409	CPEB1;EGLN2;PGK1;NDRG1
Regulation Of Stress Fiber Assembly (GO:0051492)	4/72	0.305145	0.654185	0	0	1.46094	1.73409	CCN2;PFN1;RHOA;ACTG1
Regulation Of Telomere Maintenance Via Telomerase (GO:0032210)	3/50	0.306324	0.654185	0	0	1.58492	1.87514	CCT6A;CTNNB1;MAP2K7
Metaphase Plate Congression (GO:0051310)	3/50	0.306324	0.654185	0	0	1.58492	1.87514	CENPF;RRS1;EML3
Myeloid Cell Differentiation (GO:0030099)	3/50	0.306324	0.654185	0	0	1.58492	1.87514	HSPA9;CEBPB;ZBTB16
Neurotransmitter Transport (GO:0006836)	3/50	0.306324	0.654185	0	0	1.58492	1.87514	STXBP2;NRXN2;SYN3
TOR Signaling (GO:0031929)	2/29	0.310797	0.654185	0	0	1.83877	2.14882	FLCN;EIF4EBP1
Regulation Of Interleukin-17 Production (GO:0032660)	2/29	0.310797	0.654185	0	0	1.83877	2.14882	PRNP;DDIT3
Alpha-Amino Acid Catabolic Process (GO:1901606)	2/29	0.310797	0.654185	0	0	1.83877	2.14882	ALDH4A1;PRODH
Regulation Of Protein Autophosphorylation (GO:0031952)	2/29	0.310797	0.654185	0	0	1.83877	2.14882	DDX3X;MVP
Regulation Of Protein Modification By Small Protein Conjugation Or Removal (GO:1903320)	2/29	0.310797	0.654185	0	0	1.83877	2.14882	HSP90AA1;CTNNB1
Response To Peptide (GO:1901652)	2/29	0.310797	0.654185	0	0	1.83877	2.14882	PRNP;STAT2
Liver Development (GO:0001889)	2/29	0.310797	0.654185	0	0	1.83877	2.14882	CEBPB;PHF1
Positive Regulation Of G1/S Transition Of Mitotic Cell Cycle (GO:1900087)	2/29	0.310797	0.654185	0	0	1.83877	2.14882	DDX3X;ADAMTS1
Positive Regulation Of Cell Communication (GO:0010647)	2/29	0.310797	0.654185	0	0	1.83877	2.14882	CLSTN2;CD80
Positive Regulation Of Nitrogen Compound Metabolic Process (GO:0051173)	2/29	0.310797	0.654185	0	0	1.83877	2.14882	NFKBIA;NR1H2
Receptor Signaling Pathway Via STAT (GO:0097696)	2/29	0.310797	0.654185	0	0	1.83877	2.14882	STAT2;IFNAR1
Regulation Of T Cell Receptor Signaling Pathway (GO:0050856)	2/29	0.310797	0.654185	0	0	1.83877	2.14882	PRNP;RELA
Lysosomal Transport (GO:0007041)	5/96	0.315813	0.654185	0	0	1.36476	1.57303	HOOK2;HGS;VPS11;USE1;VPS16
ERBB Signaling Pathway (GO:0038127)	3/51	0.317038	0.654185	0	0	1.55181	1.78262	SHC1;MVP;PTPN11
Autophagosome Organization (GO:1905037)	3/51	0.317038	0.654185	0	0	1.55181	1.78262	MAP1LC3B;GABARAPL1;WDR45
Mesenchymal Cell Differentiation (GO:0048762)	3/51	0.317038	0.654185	0	0	1.55181	1.78262	DDX5;TRIM28;CTNNB1
Positive Regulation Of Transcription Initiation By RNA Polymerase II (GO:0060261)	3/51	0.317038	0.654185	0	0	1.55181	1.78262	MED12;TAF13;MED20
Regulation Of Alternative mRNA Splicing, Via Spliceosome (GO:0000381)	3/51	0.317038	0.654185	0	0	1.55181	1.78262	DDX5;RBM7;SRSF6
Wnt Signaling Pathway (GO:0016055)	4/74	0.322807	0.654185	0	0	1.41903	1.6045	DDX3X;SIAH2;CTNNB1;CSNK1E
Regulation Of Organelle Assembly (GO:1902115)	4/74	0.322807	0.654185	0	0	1.41903	1.6045	KIF9;RABEP2;VPS11;MSN
Calcium-Mediated Signaling (GO:0019722)	4/74	0.322807	0.654185	0	0	1.41903	1.6045	PRNP;DMPK;TNNI3;CLU
Regulation Of NIK/NF-kappaB Signaling (GO:1901222)	4/74	0.322807	0.654185	0	0	1.41903	1.6045	NFKBIA;DDX3X;RHOA;RELA
NIK/NF-kappaB Signaling (GO:0038061)	2/30	0.325217	0.654185	0	0	1.773	1.99154	NFKBIA;RELA
Transcription Initiation-Coupled Chromatin Remodeling (GO:0045815)	2/30	0.325217	0.654185	0	0	1.773	1.99154	PHF1;SIRT7
Mesenchymal Cell Migration (GO:0090497)	2/30	0.325217	0.654185	0	0	1.773	1.99154	SEMA3B;NRTN
Negative Chemotaxis (GO:0050919)	2/30	0.325217	0.654185	0	0	1.773	1.99154	SEMA3B;RHOA
Protein Transmembrane Import Into Intracellular Organelle (GO:0044743)	2/30	0.325217	0.654185	0	0	1.773	1.99154	PEX6;HSPD1
Regulation Of Cellular Component Organization (GO:0051128)	7/144	0.325476	0.654185	0	0	1.2694	1.42486	RAP1B;HSP90AA1;RAB4B;EGLN2;PTPN11;CCNL2;SSRP1
Regulation Of Chemokine (C-X-C Motif) Ligand 2 Production (GO:2000341)	1/10	0.326693	0.654185	0	0	2.75706	3.08442	HMGB1
DNA Conformation Change (GO:0071103)	1/10	0.326693	0.654185	0	0	2.75706	3.08442	HMGB1
Regulation Of Establishment Of Protein Localization To Telomere (GO:0070203)	1/10	0.326693	0.654185	0	0	2.75706	3.08442	CCT6A
MyD88-dependent Toll-Like Receptor Signaling Pathway (GO:0002755)	1/10	0.326693	0.654185	0	0	2.75706	3.08442	HSPD1
N-acetylneuraminate Metabolic Process (GO:0006054)	1/10	0.326693	0.654185	0	0	2.75706	3.08442	ST3GAL1
Regulation Of Inclusion Body Assembly (GO:0090083)	1/10	0.326693	0.654185	0	0	2.75706	3.08442	DNAJA4
Actin Filament Depolymerization (GO:0030042)	1/10	0.326693	0.654185	0	0	2.75706	3.08442	TWF1
Regulation Of Mitotic Sister Chromatid Separation (GO:0010965)	1/10	0.326693	0.654185	0	0	2.75706	3.08442	DUSP1
Regulation Of Nitric-Oxide Synthase Biosynthetic Process (GO:0051769)	1/10	0.326693	0.654185	0	0	2.75706	3.08442	NAMPT
Regulation Of Peptidyl-Lysine Acetylation (GO:2000756)	1/10	0.326693	0.654185	0	0	2.75706	3.08442	FLCN
Regulation Of Peroxisome Proliferator Activated Receptor Signaling Pathway (GO:0035358)	1/10	0.326693	0.654185	0	0	2.75706	3.08442	GPS2
Body Fluid Secretion (GO:0007589)	1/10	0.326693	0.654185	0	0	2.75706	3.08442	NPPB
Cell Proliferation In Forebrain (GO:0021846)	1/10	0.326693	0.654185	0	0	2.75706	3.08442	MBD1
Regulation Of Response To Oxidative Stress (GO:1902882)	1/10	0.326693	0.654185	0	0	2.75706	3.08442	NFE2L2
Regulation Of Sensory Perception Of Pain (GO:0051930)	1/10	0.326693	0.654185	0	0	2.75706	3.08442	TMEM100
Cellular Response To Cholesterol (GO:0071397)	1/10	0.326693	0.654185	0	0	2.75706	3.08442	GRAMD1A
Regulation Of Transcription Of Nucleolar Large rRNA By RNA Polymerase I (GO:1901836)	1/10	0.326693	0.654185	0	0	2.75706	3.08442	SIRT7
Regulation Of Type II Interferon-Mediated Signaling Pathway (GO:0060334)	1/10	0.326693	0.654185	0	0	2.75706	3.08442	NR1H2
Cellular Response To Thyroid Hormone Stimulus (GO:0097067)	1/10	0.326693	0.654185	0	0	2.75706	3.08442	LMO2
Central Nervous System Projection Neuron Axonogenesis (GO:0021952)	1/10	0.326693	0.654185	0	0	2.75706	3.08442	SPTBN4
Removal Of Superoxide Radicals (GO:0019430)	1/10	0.326693	0.654185	0	0	2.75706	3.08442	SOD1
Response To UV-A (GO:0070141)	1/10	0.326693	0.654185	0	0	2.75706	3.08442	PPID
Copper Ion Transport (GO:0006825)	1/10	0.326693	0.654185	0	0	2.75706	3.08442	COX17
Endoplasmic Reticulum Membrane Organization (GO:0090158)	1/10	0.326693	0.654185	0	0	2.75706	3.08442	RTN4
Endosomal Lumen Acidification (GO:0048388)	1/10	0.326693	0.654185	0	0	2.75706	3.08442	ATP6V0C
Sulfation (GO:0051923)	1/10	0.326693	0.654185	0	0	2.75706	3.08442	UST
Exit From Mitosis (GO:0010458)	1/10	0.326693	0.654185	0	0	2.75706	3.08442	SIRT7
Fatty Acid Beta-Oxidation Using acyl-CoA Dehydrogenase (GO:0033539)	1/10	0.326693	0.654185	0	0	2.75706	3.08442	ETFB
Tetrahydrofolate Metabolic Process (GO:0046653)	1/10	0.326693	0.654185	0	0	2.75706	3.08442	SHMT1
Ganglion Development (GO:0061548)	1/10	0.326693	0.654185	0	0	2.75706	3.08442	CTNNB1
Genitalia Development (GO:0048806)	1/10	0.326693	0.654185	0	0	2.75706	3.08442	PTPN11
Triglyceride Catabolic Process (GO:0019433)	1/10	0.326693	0.654185	0	0	2.75706	3.08442	PNPLA2
Glycerol Metabolic Process (GO:0006071)	1/10	0.326693	0.654185	0	0	2.75706	3.08442	GK5
Histone H3-K14 Acetylation (GO:0044154)	1/10	0.326693	0.654185	0	0	2.75706	3.08442	KAT2A
Inositol Phosphate Biosynthetic Process (GO:0032958)	1/10	0.326693	0.654185	0	0	2.75706	3.08442	IP6K1
Lipoprotein Catabolic Process (GO:0042159)	1/10	0.326693	0.654185	0	0	2.75706	3.08442	CTSD
Maintenance Of Protein Localization In Endoplasmic Reticulum (GO:0035437)	1/10	0.326693	0.654185	0	0	2.75706	3.08442	OS9
Melanocyte Differentiation (GO:0030318)	1/10	0.326693	0.654185	0	0	2.75706	3.08442	LRMDA
Mesonephros Development (GO:0001823)	1/10	0.326693	0.654185	0	0	2.75706	3.08442	ZBTB16
Microtubule Anchoring At Centrosome (GO:0034454)	1/10	0.326693	0.654185	0	0	2.75706	3.08442	MBD1
Muscle Filament Sliding (GO:0030049)	1/10	0.326693	0.654185	0	0	2.75706	3.08442	MYL6
Negative Regulation Of T-helper Cell Differentiation (GO:0045623)	1/10	0.326693	0.654185	0	0	2.75706	3.08442	SMAD7
Negative Regulation Of Cartilage Development (GO:0061037)	1/10	0.326693	0.654185	0	0	2.75706	3.08442	PTPN11
Negative Regulation Of Cyclase Activity (GO:0031280)	1/10	0.326693	0.654185	0	0	2.75706	3.08442	GNAI2
Negative Regulation Of Fibrinolysis (GO:0051918)	1/10	0.326693	0.654185	0	0	2.75706	3.08442	SERPINE1
Negative Regulation Of Hemostasis (GO:1900047)	1/10	0.326693	0.654185	0	0	2.75706	3.08442	SERPINE1
Negative Regulation Of Intrinsic Apoptotic Signaling Pathway In Response To DNA Damage By P53 Class Mediator (GO:1902166)	1/10	0.326693	0.654185	0	0	2.75706	3.08442	ING2
Negative Regulation Of Platelet-Derived Growth Factor Receptor Signaling Pathway (GO:0010642)	1/10	0.326693	0.654185	0	0	2.75706	3.08442	HGS
Negative Regulation Of Release Of Sequestered Calcium Ion Into Cytosol (GO:0051280)	1/10	0.326693	0.654185	0	0	2.75706	3.08442	GSTO1
Negative Regulation Of Ryanodine-Sensitive Calcium-Release Channel Activity (GO:0060315)	1/10	0.326693	0.654185	0	0	2.75706	3.08442	GSTO1
Negative Regulation Of Smooth Muscle Cell Migration (GO:0014912)	1/10	0.326693	0.654185	0	0	2.75706	3.08442	SERPINE1
Neuron Projection Fasciculation (GO:0106030)	1/10	0.326693	0.654185	0	0	2.75706	3.08442	RTN4
Neutrophil Activation Involved In Immune Response (GO:0002283)	1/10	0.326693	0.654185	0	0	2.75706	3.08442	STXBP2
Nucleoside Triphosphate Metabolic Process (GO:0009141)	1/10	0.326693	0.654185	0	0	2.75706	3.08442	NME2
Pentose-Phosphate Shunt (GO:0006098)	1/10	0.326693	0.654185	0	0	2.75706	3.08442	PHACTR1
Peptidyl-Proline Hydroxylation (GO:0019511)	1/10	0.326693	0.654185	0	0	2.75706	3.08442	EGLN2
Positive Regulation Of Actin Nucleation (GO:0051127)	1/10	0.326693	0.654185	0	0	2.75706	3.08442	SCIN
Positive Regulation Of Alcohol Biosynthetic Process (GO:1902932)	1/10	0.326693	0.654185	0	0	2.75706	3.08442	SREBF2
Positive Regulation Of Circadian Rhythm (GO:0042753)	1/10	0.326693	0.654185	0	0	2.75706	3.08442	RORC
Positive Regulation Of Coagulation (GO:0050820)	1/10	0.326693	0.654185	0	0	2.75706	3.08442	SERPINE1
Positive Regulation Of Glycogen Biosynthetic Process (GO:0045725)	1/10	0.326693	0.654185	0	0	2.75706	3.08442	IRS2
Positive Regulation Of Granulocyte Macrophage Colony-Stimulating Factor Production (GO:0032725)	1/10	0.326693	0.654185	0	0	2.75706	3.08442	CD80
Positive Regulation Of Hemostasis (GO:1900048)	1/10	0.326693	0.654185	0	0	2.75706	3.08442	SERPINE1
Positive Regulation Of Heterotypic Cell-Cell Adhesion (GO:0034116)	1/10	0.326693	0.654185	0	0	2.75706	3.08442	FLOT1
Positive Regulation Of Insulin Receptor Signaling Pathway (GO:0046628)	1/10	0.326693	0.654185	0	0	2.75706	3.08442	PTPN11
Positive Regulation Of Post-Transcriptional Gene Silencing By RNA (GO:1900370)	1/10	0.326693	0.654185	0	0	2.75706	3.08442	ZFP36
Positive Regulation Of Vascular Endothelial Cell Proliferation (GO:1905564)	1/10	0.326693	0.654185	0	0	2.75706	3.08442	HMGB1
Protein auto-ADP-ribosylation (GO:0070213)	1/10	0.326693	0.654185	0	0	2.75706	3.08442	PARP10
Protein Insertion Into Mitochondrial Inner Membrane (GO:0045039)	1/10	0.326693	0.654185	0	0	2.75706	3.08442	TIMM10
Protein Prenylation (GO:0018342)	1/10	0.326693	0.654185	0	0	2.75706	3.08442	RABGGTA
Pyrimidine Nucleobase Metabolic Process (GO:0006206)	1/10	0.326693	0.654185	0	0	2.75706	3.08442	CTPS2
Regulation Of B Cell Apoptotic Process (GO:0002902)	1/10	0.326693	0.654185	0	0	2.75706	3.08442	IRS2
Regulation Of Amyloid Precursor Protein Biosynthetic Process (GO:0042984)	1/10	0.326693	0.654185	0	0	2.75706	3.08442	ITM2B
Regulation Of Biosynthetic Process (GO:0009889)	1/10	0.326693	0.654185	0	0	2.75706	3.08442	SLC25A33
Regulation Of Calcium Ion Transmembrane Transport Via High Voltage-Gated Calcium Channel (GO:1902514)	1/10	0.326693	0.654185	0	0	2.75706	3.08442	NPPA
Regulation Of Focal Adhesion Assembly (GO:0051893)	3/52	0.327758	0.654185	0	0	1.52005	1.69559	LDB1;RHOA;ACTG1
Signal Transduction In Response To DNA Damage (GO:0042770)	3/52	0.327758	0.654185	0	0	1.52005	1.69559	CRY1;NDRG1;MAPK12
Monoatomic Anion Transmembrane Transport (GO:0098656)	3/52	0.327758	0.654185	0	0	1.52005	1.69559	SLC5A6;LRRC8A;SLC12A9
Nucleosome Organization (GO:0034728)	3/52	0.327758	0.654185	0	0	1.52005	1.69559	BRD2;NAA60;SSRP1
Organelle Disassembly (GO:1903008)	3/52	0.327758	0.654185	0	0	1.52005	1.69559	KIF9;DDRGK1;PNPLA2
Phosphorylation (GO:0016310)	18/410	0.327769	0.654185	0	0	1.14204	1.27389	CDKL2;CDK18;BRD2;RNASEL;DMPK;TAF13;CDC42BPG;WNK4;CSNK1E;TGFBR2;GK5;TBK1;CDK6;CDK2;MKNK2;PGK1;COQ8B;PIM3
Negative Regulation Of Cell Motility (GO:2000146)	6/121	0.328797	0.655787	0	0	1.29599	1.44155	FLCN;ING2;SERPINE1;FOXO3;PODN;SMAD7
Regulation Of Epithelial To Mesenchymal Transition (GO:0010717)	4/75	0.331665	0.657739	0	0	1.39897	1.54394	PHLDB1;CTNNB1;TGFBR2;SMAD7
Cellular Response To Nutrient Levels (GO:0031669)	4/75	0.331665	0.657739	0	0	1.39897	1.54394	FLCN;MAP1LC3B;WDR45;SREBF2
Protein-Containing Complex Assembly (GO:0065003)	13/290	0.335871	0.657739	0	0	1.16659	1.27278	HSP90AA1;GPX4;PTGES3;ADRM1;CHCHD10;CLU;HSPD1;CENPF;LONP1;TSPAN4;RPL38;PPID;VAMP3
Cellular Response To Fibroblast Growth Factor Stimulus (GO:0044344)	3/53	0.338475	0.657739	0	0	1.48957	1.61365	NR4A1;ZFP36;PTPN11
Fatty Acid Biosynthetic Process (GO:0006633)	3/53	0.338475	0.657739	0	0	1.48957	1.61365	FADS3;GPX4;ACSM5
Positive Regulation Of Apoptotic Signaling Pathway (GO:2001235)	3/53	0.338475	0.657739	0	0	1.48957	1.61365	TRAF7;WWOX;DDIT3
Regulation Of Dendrite Morphogenesis (GO:0048814)	2/31	0.339557	0.657739	0	0	1.71176	1.8489	GORASP1;IL1RAPL1
Regulation Of Glucose Import (GO:0046324)	2/31	0.339557	0.657739	0	0	1.71176	1.8489	IRS2;PTPN11
Cellular Response To Amino Acid Stimulus (GO:0071230)	2/31	0.339557	0.657739	0	0	1.71176	1.8489	CPEB1;CASTOR2
Regulation Of Type I Interferon-Mediated Signaling Pathway (GO:0060338)	2/31	0.339557	0.657739	0	0	1.71176	1.8489	STAT2;PTPN11
Regulation Of Ubiquitin-Protein Transferase Activity (GO:0051438)	2/31	0.339557	0.657739	0	0	1.71176	1.8489	RPS2;SMAD7
miRNA Processing (GO:0035196)	2/31	0.339557	0.657739	0	0	1.71176	1.8489	DDX5;TARBP2
Negative Regulation Of Lymphocyte Proliferation (GO:0050672)	2/31	0.339557	0.657739	0	0	1.71176	1.8489	CEBPB;CD80
Negative Regulation Of Proteolysis (GO:0045861)	2/31	0.339557	0.657739	0	0	1.71176	1.8489	BAG6;PRNP
Non-Motile Cilium Assembly (GO:1905515)	2/31	0.339557	0.657739	0	0	1.71176	1.8489	ARL13B;MBD1
Positive Regulation Of Chromosome Organization (GO:2001252)	2/31	0.339557	0.657739	0	0	1.71176	1.8489	SMC4;SMC2
Protein Targeting To Vacuole (GO:0006623)	2/31	0.339557	0.657739	0	0	1.71176	1.8489	HGS;SQSTM1
Regulation Of Cell Adhesion Mediated By Integrin (GO:0033628)	2/31	0.339557	0.657739	0	0	1.71176	1.8489	SERPINE1;PTPN11
Vesicle-Mediated Transport To The Plasma Membrane (GO:0098876)	4/76	0.340535	0.657739	0	0	1.37945	1.486	GGA1;EHD4;OSBPL5;HGS
Endomembrane System Organization (GO:0010256)	8/171	0.344973	0.657739	0	0	1.21926	1.29764	SYNGR2;DMPK;HOOK2;GORASP1;VPS11;TLCD1;TOR1B;SQSTM1
Regulation Of Endopeptidase Activity (GO:0052548)	3/54	0.349181	0.657739	0	0	1.46027	1.53645	APH1A;SERPINE1;GAPDH
Regulation Of Extrinsic Apoptotic Signaling Pathway (GO:2001236)	3/54	0.349181	0.657739	0	0	1.46027	1.53645	WWOX;SIAH2;RELA
Regulation Of Multicellular Organismal Development (GO:2000026)	3/54	0.349181	0.657739	0	0	1.46027	1.53645	BAG6;KAT2A;BRPF3
Striated Muscle Contraction (GO:0006941)	3/54	0.349181	0.657739	0	0	1.46027	1.53645	MYL2;MYL3;TNNI3
Regulation Of Insulin Secretion (GO:0050796)	4/77	0.349413	0.657739	0	0	1.36048	1.43055	PER2;MIDN;IRS2;LRRC8A
Response To Insulin (GO:0032868)	4/77	0.349413	0.657739	0	0	1.36048	1.43055	CPEB1;IRS2;PIK3R2;SLC25A33
Protein Modification Process (GO:0036211)	28/664	0.350248	0.657739	0	0	1.09527	1.14906	RNASEL;WNK4;WDR45;NAA80;TBK1;MKNK2;PIM3;TGM7;ST3GAL1;TGM2;CDKL2;CDK18;DUSP5;BRD2;DMPK;TAF13;CDC42BPG;OGA;PTPN11;CSNK1E;RABGGTA;TGFBR2;CDK6;CTH;CDK2;UST;COQ8B;UBA52
ATP Transport (GO:0015867)	1/11	0.352814	0.657739	0	0	2.48121	2.58496	SLC25A4
T Cell Migration (GO:0072678)	1/11	0.352814	0.657739	0	0	2.48121	2.58496	MSN
acetyl-CoA Biosynthetic Process (GO:0006085)	1/11	0.352814	0.657739	0	0	2.48121	2.58496	PDHB
Regulation Of Intrinsic Apoptotic Signaling Pathway In Response To DNA Damage By P53 Class Mediator (GO:1902165)	1/11	0.352814	0.657739	0	0	2.48121	2.58496	ING2
Actin-Myosin Filament Sliding (GO:0033275)	1/11	0.352814	0.657739	0	0	2.48121	2.58496	MYL6
Regulation Of Lymphocyte Migration (GO:2000401)	1/11	0.352814	0.657739	0	0	2.48121	2.58496	MSN
Regulation Of Mesenchymal Cell Proliferation (GO:0010464)	1/11	0.352814	0.657739	0	0	2.48121	2.58496	TGFBR2
Regulation Of Nitrogen Compound Metabolic Process (GO:0051171)	1/11	0.352814	0.657739	0	0	2.48121	2.58496	ALDH2
Base-Excision Repair, AP Site Formation (GO:0006285)	1/11	0.352814	0.657739	0	0	2.48121	2.58496	NEIL2
Regulation Of Protein Exit From Endoplasmic Reticulum (GO:0070861)	1/11	0.352814	0.657739	0	0	2.48121	2.58496	SAR1A
Cardiolipin Metabolic Process (GO:0032048)	1/11	0.352814	0.657739	0	0	2.48121	2.58496	PLSCR3
Cellular Component Maintenance (GO:0043954)	1/11	0.352814	0.657739	0	0	2.48121	2.58496	PRNP
Cellular Response To Superoxide (GO:0071451)	1/11	0.352814	0.657739	0	0	2.48121	2.58496	SOD1
Regulation Of Vascular Associated Smooth Muscle Cell Migration (GO:1904752)	1/11	0.352814	0.657739	0	0	2.48121	2.58496	NR4A3
Central Nervous System Myelination (GO:0022010)	1/11	0.352814	0.657739	0	0	2.48121	2.58496	CLU
Response To Copper Ion (GO:0046688)	1/11	0.352814	0.657739	0	0	2.48121	2.58496	PRNP
Response To Interleukin-6 (GO:0070741)	1/11	0.352814	0.657739	0	0	2.48121	2.58496	RELA
Defense Response To Protozoan (GO:0042832)	1/11	0.352814	0.657739	0	0	2.48121	2.58496	GBP6
Response To Thyroid Hormone (GO:0097066)	1/11	0.352814	0.657739	0	0	2.48121	2.58496	LMO2
Secretion (GO:0046903)	1/11	0.352814	0.657739	0	0	2.48121	2.58496	NPPB
Embryonic Hemopoiesis (GO:0035162)	1/11	0.352814	0.657739	0	0	2.48121	2.58496	TGFBR2
Sphingomyelin Metabolic Process (GO:0006684)	1/11	0.352814	0.657739	0	0	2.48121	2.58496	SMPD2
Folic Acid Metabolic Process (GO:0046655)	1/11	0.352814	0.657739	0	0	2.48121	2.58496	SHMT1
Telomere Maintenance In Response To DNA Damage (GO:0043247)	1/11	0.352814	0.657739	0	0	2.48121	2.58496	SHLD1
Glucose Import (GO:0046323)	1/11	0.352814	0.657739	0	0	2.48121	2.58496	RAB4B
Inner Ear Receptor Cell Stereocilium Organization (GO:0060122)	1/11	0.352814	0.657739	0	0	2.48121	2.58496	SOD1
Methylguanosine-Cap Decapping (GO:0110156)	1/11	0.352814	0.657739	0	0	2.48121	2.58496	EDC4
Mitochondrial Transcription (GO:0006390)	1/11	0.352814	0.657739	0	0	2.48121	2.58496	SLC25A33
ncRNA Transcription (GO:0098781)	1/11	0.352814	0.657739	0	0	2.48121	2.58496	SIRT7
Negative Regulation By Host Of Viral Process (GO:0044793)	1/11	0.352814	0.657739	0	0	2.48121	2.58496	PSMC3
Negative Regulation Of Alcohol Biosynthetic Process (GO:1902931)	1/11	0.352814	0.657739	0	0	2.48121	2.58496	SOD1
Negative Regulation Of calcineurin-NFAT Signaling Cascade (GO:0070885)	1/11	0.352814	0.657739	0	0	2.48121	2.58496	PRNP
Negative Regulation Of Calcineurin-Mediated Signaling (GO:0106057)	1/11	0.352814	0.657739	0	0	2.48121	2.58496	PRNP
Negative Regulation Of Chondrocyte Differentiation (GO:0032331)	1/11	0.352814	0.657739	0	0	2.48121	2.58496	PTPN11
Negative Regulation Of Cytokine Production Involved In Immune Response (GO:0002719)	1/11	0.352814	0.657739	0	0	2.48121	2.58496	SMAD7
Negative Regulation Of Defense Response To Virus (GO:0050687)	1/11	0.352814	0.657739	0	0	2.48121	2.58496	TARBP2
Negative Regulation Of Hippo Signaling (GO:0035331)	1/11	0.352814	0.657739	0	0	2.48121	2.58496	MAP2K3
Negative Regulation Of Mononuclear Cell Migration (GO:0071676)	1/11	0.352814	0.657739	0	0	2.48121	2.58496	DUSP1
Negative Regulation Of Toll-Like Receptor Signaling Pathway (GO:0034122)	1/11	0.352814	0.657739	0	0	2.48121	2.58496	GPS2
Nuclear Body Organization (GO:0030575)	1/11	0.352814	0.657739	0	0	2.48121	2.58496	ZPR1
Nucleoside Phosphate Biosynthetic Process (GO:1901293)	1/11	0.352814	0.657739	0	0	2.48121	2.58496	NME2
Peptidyl-Lysine Trimethylation (GO:0018023)	1/11	0.352814	0.657739	0	0	2.48121	2.58496	ETFBKMT
Phospholipid Homeostasis (GO:0055091)	1/11	0.352814	0.657739	0	0	2.48121	2.58496	TLCD1
Polyamine Metabolic Process (GO:0006595)	1/11	0.352814	0.657739	0	0	2.48121	2.58496	HDAC10
Positive Regulation By Symbiont Of Entry Into Host (GO:0075294)	1/11	0.352814	0.657739	0	0	2.48121	2.58496	HMGB1
Positive Regulation Of Cellular Response To Insulin Stimulus (GO:1900078)	1/11	0.352814	0.657739	0	0	2.48121	2.58496	PTPN11
Positive Regulation Of Lyase Activity (GO:0051349)	1/11	0.352814	0.657739	0	0	2.48121	2.58496	ISCU
Positive Regulation Of Metaphase/Anaphase Transition Of Cell Cycle (GO:1902101)	1/11	0.352814	0.657739	0	0	2.48121	2.58496	ANAPC5
Positive Regulation Of Mitotic Metaphase/Anaphase Transition (GO:0045842)	1/11	0.352814	0.657739	0	0	2.48121	2.58496	ANAPC5
Positive Regulation Of Protein Localization To Chromosome, Telomeric Region (GO:1904816)	1/11	0.352814	0.657739	0	0	2.48121	2.58496	CCT6A
Positive Regulation Of Regulatory T Cell Differentiation (GO:0045591)	1/11	0.352814	0.657739	0	0	2.48121	2.58496	FOXO3
Positive Regulation Of Superoxide Anion Generation (GO:0032930)	1/11	0.352814	0.657739	0	0	2.48121	2.58496	SOD1
Positive Regulation Of Triglyceride Biosynthetic Process (GO:0010867)	1/11	0.352814	0.657739	0	0	2.48121	2.58496	NR1H2
Positive Regulation Of Viral Entry Into Host Cell (GO:0046598)	1/11	0.352814	0.657739	0	0	2.48121	2.58496	HMGB1
Post-Transcriptional Gene Silencing (GO:0016441)	1/11	0.352814	0.657739	0	0	2.48121	2.58496	TARBP2
Protein Polyglutamylation (GO:0018095)	1/11	0.352814	0.657739	0	0	2.48121	2.58496	CFAP20
Regulation Of ERBB Signaling Pathway (GO:1901184)	1/11	0.352814	0.657739	0	0	2.48121	2.58496	RHBDF1
Regulation Of T Cell Differentiation In Thymus (GO:0033081)	1/11	0.352814	0.657739	0	0	2.48121	2.58496	SOD1
Regulation Of T-helper 17 Cell Differentiation (GO:2000319)	1/11	0.352814	0.657739	0	0	2.48121	2.58496	SMAD7
Regulation Of T-helper 17 Type Immune Response (GO:2000316)	1/11	0.352814	0.657739	0	0	2.48121	2.58496	SMAD7
Regulation Of Actin Filament Organization (GO:0110053)	1/11	0.352814	0.657739	0	0	2.48121	2.58496	NAA80
Regulation Of Amyloid Precursor Protein Catabolic Process (GO:1902991)	1/11	0.352814	0.657739	0	0	2.48121	2.58496	PRNP
Regulation Of Cell Cycle Checkpoint (GO:1901976)	1/11	0.352814	0.657739	0	0	2.48121	2.58496	CRY1
Apoptotic Mitochondrial Changes (GO:0008637)	2/32	0.353801	0.657739	0	0	1.65461	1.71917	CLU;HSPD1
Axoneme Assembly (GO:0035082)	2/32	0.353801	0.657739	0	0	1.65461	1.71917	RP1;CFAP46
Regulation Of Postsynaptic Membrane Potential (GO:0060078)	2/32	0.353801	0.657739	0	0	1.65461	1.71917	NPFF;GRIN2D
Regulation Of Receptor Internalization (GO:0002090)	2/32	0.353801	0.657739	0	0	1.65461	1.71917	FLOT1;ANKRD13A
Endoderm Formation (GO:0001706)	2/32	0.353801	0.657739	0	0	1.65461	1.71917	DUSP5;DUSP1
Lytic Vacuole Organization (GO:0080171)	2/32	0.353801	0.657739	0	0	1.65461	1.71917	HOOK2;HPS1
Negative Regulation Of Blood Vessel Endothelial Cell Migration (GO:0043537)	2/32	0.353801	0.657739	0	0	1.65461	1.71917	HMGB1;RHOA
Negative Regulation Of Epithelial Cell Apoptotic Process (GO:1904036)	2/32	0.353801	0.657739	0	0	1.65461	1.71917	SERPINE1;NFE2L2
Negative Regulation Of Mitotic Cell Cycle (GO:0045930)	2/32	0.353801	0.657739	0	0	1.65461	1.71917	BTG2;CTNNB1
Negative Regulation Of Osteoblast Differentiation (GO:0045668)	2/32	0.353801	0.657739	0	0	1.65461	1.71917	CDK6;NOCT
Organophosphate Biosynthetic Process (GO:0090407)	2/32	0.353801	0.657739	0	0	1.65461	1.71917	GK5;IP6K1
Positive Regulation Of Cytokinesis (GO:0032467)	2/32	0.353801	0.657739	0	0	1.65461	1.71917	CSPP1;RHOA
Positive Regulation Of Myeloid Cell Differentiation (GO:0045639)	2/32	0.353801	0.657739	0	0	1.65461	1.71917	SCIN;FOXO3
Positive Regulation Of Transcription By RNA Polymerase I (GO:0045943)	2/32	0.353801	0.657739	0	0	1.65461	1.71917	SIRT7;SF3B1
Protein Methylation (GO:0006479)	2/32	0.353801	0.657739	0	0	1.65461	1.71917	PRMT5;ETFBKMT
Regulation Of DNA Biosynthetic Process (GO:2000278)	2/32	0.353801	0.657739	0	0	1.65461	1.71917	SMOC2;ANKRD1
RNA Metabolic Process (GO:0016070)	5/101	0.354359	0.657933	0	0	1.2933	1.34173	ATXN2L;RBM3;RNASEL;DDX3X;MPHOSPH10
Regulation Of Protein Serine/Threonine Kinase Activity (GO:0071900)	5/101	0.354359	0.657933	0	0	1.2933	1.34173	CCND3;DDX3X;HGS;ACTB;RHOA
Positive Regulation Of Protein Phosphorylation (GO:0001934)	15/344	0.357659	0.663636	0	0	1.13316	1.16509	MAP2K3;PRNP;HSP90AA1;DDX3X;CD80;VEGFD;PTPN11;TGFBR2;MOB3C;FLCN;CCND3;TBK1;DDRGK1;FLOT1;PPIA
Glucose Homeostasis (GO:0042593)	4/78	0.358292	0.664386	0	0	1.34202	1.37745	CRY2;CRY1;PIK3R2;LRRC8A
Negative Regulation Of Multicellular Organismal Process (GO:0051241)	9/198	0.361288	0.665493	0	0	1.18289	1.20427	FLCN;ING2;DDIT3;NR1H2;LAMA4;SRSF6;IP6K1;SMAD7;ASB1
Positive Regulation Of Translation (GO:0045727)	5/102	0.362102	0.665493	0	0	1.27989	1.30015	RBM3;EIF5A;DDX3X;PLXNB2;EEF2
Regulation Of JNK Cascade (GO:0046328)	5/102	0.362102	0.665493	0	0	1.27989	1.30015	PER1;GADD45B;GPS2;CCN2;HMGB1
Organic Substance Transport (GO:0071702)	8/174	0.362598	0.665493	0	0	1.19701	1.21432	CENPF;ARRDC2;TXNIP;AQP4;SLC50A1;MFSD2B;CLU;LRP1B
Regulation Of Cell Cycle Process (GO:0010564)	6/126	0.363429	0.665493	0	0	1.24163	1.25674	FLCN;PRMT5;CTNNB1;CCNL2;KIF11;RRP8
Negative Regulation Of Binding (GO:0051100)	4/79	0.367169	0.665493	0	0	1.32404	1.3266	NFKBIA;JUN;SUMO3;CSNK1E
Negative Regulation Of Protein Kinase Activity (GO:0006469)	4/79	0.367169	0.665493	0	0	1.32404	1.3266	CAMK2N1;MVP;PPIA;TARBP2
Positive Regulation Of Protein Ubiquitination (GO:0031398)	4/79	0.367169	0.665493	0	0	1.32404	1.3266	PHF23;CRY1;RPS2;SMAD7
Adherens Junction Organization (GO:0034332)	2/33	0.367935	0.665493	0	0	1.60114	1.6009	CTNNB1;SMAD7
Semaphorin-Plexin Signaling Pathway (GO:0071526)	2/33	0.367935	0.665493	0	0	1.60114	1.6009	SEMA3B;PLXNB2
Vitamin Transport (GO:0051180)	2/33	0.367935	0.665493	0	0	1.60114	1.6009	SLC5A6;SLC35F3
Muscle Tissue Development (GO:0060537)	2/33	0.367935	0.665493	0	0	1.60114	1.6009	POPDC2;MYL6
Negative Regulation Of Protein Secretion (GO:0050709)	2/33	0.367935	0.665493	0	0	1.60114	1.6009	RHBDF1;MIDN
Neural Crest Cell Migration (GO:0001755)	2/33	0.367935	0.665493	0	0	1.60114	1.6009	SEMA3B;NRTN
Receptor Signaling Pathway Via JAK-STAT (GO:0007259)	2/33	0.367935	0.665493	0	0	1.60114	1.6009	STAT2;IFNAR1
Regulation Of Axon Extension (GO:0030516)	2/33	0.367935	0.665493	0	0	1.60114	1.6009	ZFYVE27;RTN4
Extracellular Matrix Organization (GO:0030198)	7/151	0.369774	0.665493	0	0	1.2072	1.201	SMOC2;ADAMTS2;KIF9;ADAMTS1;ADAMTSL4;FLOT1;COLGALT1
Nitrogen Compound Transport (GO:0071705)	7/151	0.369774	0.665493	0	0	1.2072	1.201	SLC6A6;CENPF;SLC15A2;SLC35F3;ARRDC2;TXNIP;LRP1B
Plasma Membrane Bounded Cell Projection Organization (GO:0120036)	6/127	0.370385	0.665493	0	0	1.2313	1.22294	CFAP61;BTG2;ZFYVE27;ARFIP2;NRTN;HMGB1
Regulation Of Transcription Initiation By RNA Polymerase II (GO:0060260)	3/56	0.370529	0.665493	0	0	1.405	1.39492	MED12;TAF13;MED20
Monocarboxylic Acid Biosynthetic Process (GO:0072330)	3/56	0.370529	0.665493	0	0	1.405	1.39492	PER2;UST;ACSM5
Peptidyl-Threonine Phosphorylation (GO:0018107)	3/56	0.370529	0.665493	0	0	1.405	1.39492	TBK1;CDC42BPG;TGFBR2
Positive Regulation Of Cell Junction Assembly (GO:1901890)	3/56	0.370529	0.665493	0	0	1.405	1.39492	CLSTN2;IL1RAPL1;FLOT1
post-Golgi Vesicle-Mediated Transport (GO:0006892)	3/56	0.370529	0.665493	0	0	1.405	1.39492	GGA1;AP1G2;OSBPL5
Protein Targeting To Mitochondrion (GO:0006626)	3/56	0.370529	0.665493	0	0	1.405	1.39492	HSP90AA1;TIMM10;HSPD1
Protein Modification By Small Protein Conjugation (GO:0032446)	14/323	0.373185	0.665493	0	0	1.12575	1.10963	BRAP;TRAF7;TRIM28;OS9;DDRGK1;SUMO3;VPS11;SDE2;RNF181;UBA52;RNF152;FBXL7;NFE2L2;ASB1
Sensory Perception Of Mechanical Stimulus (GO:0050954)	4/80	0.37604	0.665493	0	0	1.30655	1.27788	SPTBN4;LHFPL3;TIMM10;SOD1
Regulation Of Cell Division (GO:0051302)	4/80	0.37604	0.665493	0	0	1.30655	1.27788	FLCN;KAT2A;CSPP1;TXNIP
C4-dicarboxylate Transport (GO:0015740)	1/12	0.377923	0.665493	0	0	2.25552	2.19476	SLC25A18
N-terminal Protein Amino Acid Modification (GO:0031365)	1/12	0.377923	0.665493	0	0	2.25552	2.19476	NAA60
Regulation Of Granulocyte Macrophage Colony-Stimulating Factor Production (GO:0032645)	1/12	0.377923	0.665493	0	0	2.25552	2.19476	CD80
T Cell Mediated Immunity (GO:0002456)	1/12	0.377923	0.665493	0	0	2.25552	2.19476	EMP2
V(D)J Recombination (GO:0033151)	1/12	0.377923	0.665493	0	0	2.25552	2.19476	HMGB1
Regulation Of Lamellipodium Organization (GO:1902743)	1/12	0.377923	0.665493	0	0	2.25552	2.19476	TWF1
Alanine Transport (GO:0032328)	1/12	0.377923	0.665493	0	0	2.25552	2.19476	SLC6A6
Aminoglycan Catabolic Process (GO:0006026)	1/12	0.377923	0.665493	0	0	2.25552	2.19476	OVGP1
Axonal Fasciculation (GO:0007413)	1/12	0.377923	0.665493	0	0	2.25552	2.19476	RTN4
Regulation Of Oxidoreductase Activity (GO:0051341)	1/12	0.377923	0.665493	0	0	2.25552	2.19476	FDX2
Regulation Of Platelet-Derived Growth Factor Receptor Signaling Pathway (GO:0010640)	1/12	0.377923	0.665493	0	0	2.25552	2.19476	HGS
Cell Projection Assembly (GO:0030031)	1/12	0.377923	0.665493	0	0	2.25552	2.19476	SCIN
Cellular Response To Exogenous dsRNA (GO:0071360)	1/12	0.377923	0.665493	0	0	2.25552	2.19476	FLOT1
Regulation Of Superoxide Anion Generation (GO:0032928)	1/12	0.377923	0.665493	0	0	2.25552	2.19476	SOD1
Retrotransposon Silencing (GO:0010526)	1/12	0.377923	0.665493	0	0	2.25552	2.19476	SIRT7
Semaphorin-Plexin Signaling Pathway Involved In Neuron Projection Guidance (GO:1902285)	1/12	0.377923	0.665493	0	0	2.25552	2.19476	PLXNB2
Endochondral Bone Morphogenesis (GO:0060350)	1/12	0.377923	0.665493	0	0	2.25552	2.19476	INPPL1
Endoplasmic Reticulum Mannose Trimming (GO:1904380)	1/12	0.377923	0.665493	0	0	2.25552	2.19476	EDEM2
Spinal Cord Development (GO:0021510)	1/12	0.377923	0.665493	0	0	2.25552	2.19476	ZPR1
Suppression Of Viral Release By Host (GO:0044790)	1/12	0.377923	0.665493	0	0	2.25552	2.19476	TRIM28
Eye Photoreceptor Cell Development (GO:0042462)	1/12	0.377923	0.665493	0	0	2.25552	2.19476	RP1
Glucosamine-Containing Compound Metabolic Process (GO:1901071)	1/12	0.377923	0.665493	0	0	2.25552	2.19476	OGA
Glutamine Family Amino Acid Catabolic Process (GO:0009065)	1/12	0.377923	0.665493	0	0	2.25552	2.19476	PRODH
Vascular Endothelial Growth Factor Signaling Pathway (GO:0038084)	1/12	0.377923	0.665493	0	0	2.25552	2.19476	VEGFD
High-Density Lipoprotein Particle Remodeling (GO:0034375)	1/12	0.377923	0.665493	0	0	2.25552	2.19476	LCAT
Ionotropic Glutamate Receptor Signaling Pathway (GO:0035235)	1/12	0.377923	0.665493	0	0	2.25552	2.19476	GRIN2D
Keratan Sulfate Biosynthetic Process (GO:0018146)	1/12	0.377923	0.665493	0	0	2.25552	2.19476	ST3GAL1
Membrane Protein Intracellular Domain Proteolysis (GO:0031293)	1/12	0.377923	0.665493	0	0	2.25552	2.19476	APH1A
Microtubule Anchoring At Microtubule Organizing Center (GO:0072393)	1/12	0.377923	0.665493	0	0	2.25552	2.19476	MBD1
Monoacylglycerol Metabolic Process (GO:0046462)	1/12	0.377923	0.665493	0	0	2.25552	2.19476	DGAT2
Morphogenesis Of A Polarized Epithelium (GO:0001738)	1/12	0.377923	0.665493	0	0	2.25552	2.19476	ACTG1
Myelination In Peripheral Nervous System (GO:0022011)	1/12	0.377923	0.665493	0	0	2.25552	2.19476	SOD1
Negative Regulation Of Coagulation (GO:0050819)	1/12	0.377923	0.665493	0	0	2.25552	2.19476	SERPINE1
Negative Regulation Of Lyase Activity (GO:0051350)	1/12	0.377923	0.665493	0	0	2.25552	2.19476	GNAI2
Negative Regulation Of Transcription Regulatory Region DNA Binding (GO:2000678)	1/12	0.377923	0.665493	0	0	2.25552	2.19476	PER2
Negative Regulation Of Tumor Necrosis Factor-Mediated Signaling Pathway (GO:0010804)	1/12	0.377923	0.665493	0	0	2.25552	2.19476	GPS2
Neutrophil Mediated Immunity (GO:0002446)	1/12	0.377923	0.665493	0	0	2.25552	2.19476	STXBP2
Nucleotide Metabolic Process (GO:0009117)	1/12	0.377923	0.665493	0	0	2.25552	2.19476	FHIT
Oligosaccharide-Lipid Intermediate Biosynthetic Process (GO:0006490)	1/12	0.377923	0.665493	0	0	2.25552	2.19476	DPM1
Phosphatidylcholine Acyl-Chain Remodeling (GO:0036151)	1/12	0.377923	0.665493	0	0	2.25552	2.19476	NR1H2
Plasma Membrane Tubulation (GO:0097320)	1/12	0.377923	0.665493	0	0	2.25552	2.19476	CAVIN2
Positive Regulation Of T Cell Receptor Signaling Pathway (GO:0050862)	1/12	0.377923	0.665493	0	0	2.25552	2.19476	RELA
Positive Regulation Of T-helper Cell Differentiation (GO:0045624)	1/12	0.377923	0.665493	0	0	2.25552	2.19476	CD80
Positive Regulation Of Alpha-Beta T Cell Differentiation (GO:0046638)	1/12	0.377923	0.665493	0	0	2.25552	2.19476	TGFBR2
Positive Regulation Of Cell Morphogenesis Involved In Differentiation (GO:0010770)	1/12	0.377923	0.665493	0	0	2.25552	2.19476	IL1RAPL1
Positive Regulation Of Exosomal Secretion (GO:1903543)	1/12	0.377923	0.665493	0	0	2.25552	2.19476	HGS
Positive Regulation Of Histone H3-K4 Methylation (GO:0051571)	1/12	0.377923	0.665493	0	0	2.25552	2.19476	CTNNB1
Positive Regulation Of Integrin-Mediated Signaling Pathway (GO:2001046)	1/12	0.377923	0.665493	0	0	2.25552	2.19476	EMP2
Positive Regulation Of Long-Term Synaptic Potentiation (GO:1900273)	1/12	0.377923	0.665493	0	0	2.25552	2.19476	SQSTM1
pre-miRNA Processing (GO:0031054)	1/12	0.377923	0.665493	0	0	2.25552	2.19476	TARBP2
Protein Localization To Synapse (GO:0035418)	1/12	0.377923	0.665493	0	0	2.25552	2.19476	NRXN2
Protein Localization To Vacuole (GO:0072665)	1/12	0.377923	0.665493	0	0	2.25552	2.19476	RTN4
Pyrimidine Deoxyribonucleotide Catabolic Process (GO:0009223)	1/12	0.377923	0.665493	0	0	2.25552	2.19476	NEIL2
Quinone Biosynthetic Process (GO:1901663)	1/12	0.377923	0.665493	0	0	2.25552	2.19476	COQ8B
Regulation Of Amyloid-Beta Clearance (GO:1900221)	1/12	0.377923	0.665493	0	0	2.25552	2.19476	CLU
Transcription By RNA Polymerase II (GO:0006366)	8/177	0.380308	0.669286	0	0	1.17555	1.1365	DRAP1;KLF13;TAF13;NOCT;NR1H2;MED20;ADRM1;IRF9
Positive Regulation Of Cysteine-Type Endopeptidase Activity (GO:2001056)	3/57	0.381157	0.669733	0	0	1.3789	1.33001	DDX3X;HMGB1;CTSD
Cellular Response To Heat (GO:0034605)	2/34	0.381946	0.669733	0	0	1.55101	1.49281	HSP90AA1;IER5
Release Of Sequestered Calcium Ion Into Cytosol (GO:0051209)	2/34	0.381946	0.669733	0	0	1.55101	1.49281	GHITM;CLU
Substrate Adhesion-Dependent Cell Spreading (GO:0034446)	2/34	0.381946	0.669733	0	0	1.55101	1.49281	RHOA;VAMP3
Negative Regulation Of Protein Kinase B Signaling (GO:0051898)	2/34	0.381946	0.669733	0	0	1.55101	1.49281	FLCN;DDIT3
Positive Regulation Of Wound Healing (GO:0090303)	2/34	0.381946	0.669733	0	0	1.55101	1.49281	SMOC2;SERPINE1
Regulation Of Osteoblast Differentiation (GO:0045667)	4/81	0.384899	0.669981	0	0	1.2895	1.23119	DDX5;CDK6;NOCT;TENT5A
Regulation Of Embryonic Development (GO:0045995)	3/58	0.391745	0.669981	0	0	1.35375	1.26866	BAG6;PHLDB1;KAT2A
Neuropeptide Signaling Pathway (GO:0007218)	3/58	0.391745	0.669981	0	0	1.35375	1.26866	NPPB;NPPA;RELA
Protein-Containing Complex Disassembly (GO:0032984)	3/58	0.391745	0.669981	0	0	1.35375	1.26866	NAPA;MAP1LC3B;VPS16
Peptidyl-Serine Phosphorylation (GO:0018105)	7/155	0.395276	0.669981	0	0	1.1743	1.08995	TBK1;DMPK;CDK2;MKNK2;CSNK1E;MAPK12;TGFBR2
Regulation Of Mitochondrial Membrane Potential (GO:0051881)	2/35	0.395823	0.669981	0	0	1.50392	1.39382	SLC25A33;SOD1
Regulation Of Nitric Oxide Biosynthetic Process (GO:0045428)	2/35	0.395823	0.669981	0	0	1.50392	1.39382	HSP90AA1;CLU
Cellular Defense Response (GO:0006968)	2/35	0.395823	0.669981	0	0	1.50392	1.39382	LSP1;RELA
Regulation Of Vascular Associated Smooth Muscle Cell Proliferation (GO:1904705)	2/35	0.395823	0.669981	0	0	1.50392	1.39382	JUN;NR4A3
Regulatory ncRNA Processing (GO:0070918)	2/35	0.395823	0.669981	0	0	1.50392	1.39382	EXD1;TARBP2
Establishment Of Protein Localization To Plasma Membrane (GO:0061951)	2/35	0.395823	0.669981	0	0	1.50392	1.39382	GGA1;GORASP1
Extracellular Matrix Disassembly (GO:0022617)	2/35	0.395823	0.669981	0	0	1.50392	1.39382	KIF9;FLOT1
Unsaturated Fatty Acid Metabolic Process (GO:0033559)	2/35	0.395823	0.669981	0	0	1.50392	1.39382	FADS3;GPX4
Negative Regulation Of Endothelial Cell Migration (GO:0010596)	2/35	0.395823	0.669981	0	0	1.50392	1.39382	DNAJA4;HMGB1
Negative Regulation Of Transport (GO:0051051)	2/35	0.395823	0.669981	0	0	1.50392	1.39382	NR1H2;CRYAB
Positive Regulation Of Axonogenesis (GO:0050772)	2/35	0.395823	0.669981	0	0	1.50392	1.39382	ZFYVE27;PLXNB2
Protein Localization To Cilium (GO:0061512)	2/35	0.395823	0.669981	0	0	1.50392	1.39382	TCTN2;TCTN1
Protein Localization To Membrane (GO:0072657)	8/180	0.398064	0.669981	0	0	1.15485	1.06378	SPTBN4;ZFYVE27;EHD4;HGS;BSG;FLOT1;NRXN2;EMP2
Positive Regulation Of Transferase Activity (GO:0051347)	6/131	0.398238	0.669981	0	0	1.19162	1.09713	HSP90AA1;PTGES3;CTNNB1;RPS2;MAP2K7;MERTK
Positive Regulation Of Protein Modification Process (GO:0031401)	9/205	0.400037	0.669981	0	0	1.14017	1.04462	MOB3C;FLCN;CCND3;HSP90AA1;DDX3X;FLOT1;VEGFD;PPIA;RRP8
B Cell Proliferation (GO:0042100)	1/13	0.402059	0.669981	0	0	2.06744	1.88376	HSPD1
Regulation Of Epithelial Cell Differentiation (GO:0030856)	1/13	0.402059	0.669981	0	0	2.06744	1.88376	CEBPB
Regulation Of Fatty Acid Beta-Oxidation (GO:0031998)	1/13	0.402059	0.669981	0	0	2.06744	1.88376	IRS2
N-acetylglucosamine Metabolic Process (GO:0006044)	1/13	0.402059	0.669981	0	0	2.06744	1.88376	OGA
Regulation Of Gastrulation (GO:0010470)	1/13	0.402059	0.669981	0	0	2.06744	1.88376	PHLDB1
Regulation Of Hormone Secretion (GO:0046883)	1/13	0.402059	0.669981	0	0	2.06744	1.88376	VAMP3
Regulation Of Intrinsic Apoptotic Signaling Pathway In Response To DNA Damage (GO:1902229)	1/13	0.402059	0.669981	0	0	2.06744	1.88376	CLU
Regulation Of Isotype Switching (GO:0045191)	1/13	0.402059	0.669981	0	0	2.06744	1.88376	SHLD1
Regulation Of Mast Cell Degranulation (GO:0043304)	1/13	0.402059	0.669981	0	0	2.06744	1.88376	STXBP2
Amyloid Precursor Protein Catabolic Process (GO:0042987)	1/13	0.402059	0.669981	0	0	2.06744	1.88376	APH1A
Amyloid-Beta Metabolic Process (GO:0050435)	1/13	0.402059	0.669981	0	0	2.06744	1.88376	APH1A
Aorta Development (GO:0035904)	1/13	0.402059	0.669981	0	0	2.06744	1.88376	TGFBR2
Regulation Of Monocyte Differentiation (GO:0045655)	1/13	0.402059	0.669981	0	0	2.06744	1.88376	CDK6
Regulation Of Myoblast Fusion (GO:1901739)	1/13	0.402059	0.669981	0	0	2.06744	1.88376	FLOT1
Atrioventricular Valve Development (GO:0003171)	1/13	0.402059	0.669981	0	0	2.06744	1.88376	TGFBR2
Cardiac Left Ventricle Morphogenesis (GO:0003214)	1/13	0.402059	0.669981	0	0	2.06744	1.88376	TGFBR2
Cellular Response To Corticosteroid Stimulus (GO:0071384)	1/13	0.402059	0.669981	0	0	2.06744	1.88376	ZFP36
Centromere Complex Assembly (GO:0034508)	1/13	0.402059	0.669981	0	0	2.06744	1.88376	CENPF
Response To UV-B (GO:0010224)	1/13	0.402059	0.669981	0	0	2.06744	1.88376	RELA
Cytoplasmic Sequestering Of Protein (GO:0051220)	1/13	0.402059	0.669981	0	0	2.06744	1.88376	NFKBIA
Cytoplasmic Sequestering Of Transcription Factor (GO:0042994)	1/13	0.402059	0.669981	0	0	2.06744	1.88376	NFKBIA
Defense Response To Fungus (GO:0050832)	1/13	0.402059	0.669981	0	0	2.06744	1.88376	GAPDH
Dolichol Metabolic Process (GO:0019348)	1/13	0.402059	0.669981	0	0	2.06744	1.88376	DPM1
Secondary Palate Development (GO:0062009)	1/13	0.402059	0.669981	0	0	2.06744	1.88376	TGFBR2
Establishment Of Protein Localization To Endoplasmic Reticulum (GO:0072599)	1/13	0.402059	0.669981	0	0	2.06744	1.88376	ZFAND2B
Facultative Heterochromatin Formation (GO:0140718)	1/13	0.402059	0.669981	0	0	2.06744	1.88376	RRP8
Thymus Development (GO:0048538)	1/13	0.402059	0.669981	0	0	2.06744	1.88376	SOD1
Ganglioside Biosynthetic Process (GO:0001574)	1/13	0.402059	0.669981	0	0	2.06744	1.88376	ST3GAL1
Ubiquinone Biosynthetic Process (GO:0006744)	1/13	0.402059	0.669981	0	0	2.06744	1.88376	COQ8B
Vasodilation (GO:0042311)	1/13	0.402059	0.669981	0	0	2.06744	1.88376	SOD1
Heparan Sulfate Proteoglycan Metabolic Process (GO:0030201)	1/13	0.402059	0.669981	0	0	2.06744	1.88376	HS3ST4
Microvillus Organization (GO:0032528)	1/13	0.402059	0.669981	0	0	2.06744	1.88376	RAP1B
Mitochondrial DNA Metabolic Process (GO:0032042)	1/13	0.402059	0.669981	0	0	2.06744	1.88376	LONP1
Mitochondrial Calcium Ion Transmembrane Transport (GO:0006851)	1/13	0.402059	0.669981	0	0	2.06744	1.88376	GHITM
Monosaccharide Transmembrane Transport (GO:0015749)	1/13	0.402059	0.669981	0	0	2.06744	1.88376	SLC50A1
Natural Killer Cell Mediated Immunity (GO:0002228)	1/13	0.402059	0.669981	0	0	2.06744	1.88376	TUBB4B
Negative Regulation Of Calcium Ion Transport (GO:0051926)	1/13	0.402059	0.669981	0	0	2.06744	1.88376	MRLN
Negative Regulation Of Cell Migration Involved In Sprouting Angiogenesis (GO:0090051)	1/13	0.402059	0.669981	0	0	2.06744	1.88376	RHOA
Negative Regulation Of Endoplasmic Reticulum Unfolded Protein Response (GO:1900102)	1/13	0.402059	0.669981	0	0	2.06744	1.88376	DDRGK1
Negative Regulation Of Viral Transcription (GO:0032897)	1/13	0.402059	0.669981	0	0	2.06744	1.88376	ZFP36
Nuclear Pore Organization (GO:0006999)	1/13	0.402059	0.669981	0	0	2.06744	1.88376	RTN4
Peptidyl-Methionine Modification (GO:0018206)	1/13	0.402059	0.669981	0	0	2.06744	1.88376	NAA60
Photoreceptor Cell Development (GO:0042461)	1/13	0.402059	0.669981	0	0	2.06744	1.88376	RP1
Positive Regulation Of Activated T Cell Proliferation (GO:0042104)	1/13	0.402059	0.669981	0	0	2.06744	1.88376	HMGB1
Positive Regulation Of Cell Cycle Phase Transition (GO:1901989)	1/13	0.402059	0.669981	0	0	2.06744	1.88376	DDRGK1
Positive Regulation Of Double-Strand Break Repair Via Nonhomologous End Joining (GO:2001034)	1/13	0.402059	0.669981	0	0	2.06744	1.88376	SHLD1
Positive Regulation Of Fatty Acid Biosynthetic Process (GO:0045723)	1/13	0.402059	0.669981	0	0	2.06744	1.88376	NR1H2
Positive Regulation Of Homotypic Cell-Cell Adhesion (GO:0034112)	1/13	0.402059	0.669981	0	0	2.06744	1.88376	MFSD2B
Positive Regulation Of Immunoglobulin Mediated Immune Response (GO:0002891)	1/13	0.402059	0.669981	0	0	2.06744	1.88376	SHLD1
Positive Regulation Of Muscle Cell Differentiation (GO:0051149)	1/13	0.402059	0.669981	0	0	2.06744	1.88376	MAPK12
Positive Regulation Of Myeloid Leukocyte Cytokine Production Involved In Immune Response (GO:0061081)	1/13	0.402059	0.669981	0	0	2.06744	1.88376	NR4A3
Positive Regulation Of Transmembrane Transport (GO:0034764)	1/13	0.402059	0.669981	0	0	2.06744	1.88376	NR4A3
Presynapse Assembly (GO:0099054)	1/13	0.402059	0.669981	0	0	2.06744	1.88376	IL1RAPL1
Protein Import Into Peroxisome Matrix (GO:0016558)	1/13	0.402059	0.669981	0	0	2.06744	1.88376	PEX6
Protein Localization To Phagophore Assembly Site (GO:0034497)	1/13	0.402059	0.669981	0	0	2.06744	1.88376	WDR45
Regulation Of B Cell Receptor Signaling Pathway (GO:0050855)	1/13	0.402059	0.669981	0	0	2.06744	1.88376	GPS2
Regulation Of IRE1-mediated Unfolded Protein Response (GO:1903894)	1/13	0.402059	0.669981	0	0	2.06744	1.88376	DDRGK1
Regulation Of MHC Class II Biosynthetic Process (GO:0045346)	1/13	0.402059	0.669981	0	0	2.06744	1.88376	RFXANK
Regulation Of T Cell Cytokine Production (GO:0002724)	1/13	0.402059	0.669981	0	0	2.06744	1.88376	SMAD7
Activation Of Cysteine-Type Endopeptidase Activity Involved In Apoptotic Process (GO:0006919)	3/59	0.402286	0.669981	0	0	1.3295	1.21064	DIABLO;HSPE1;HSPD1
Response To Type II Interferon (GO:0034341)	3/59	0.402286	0.669981	0	0	1.3295	1.21064	GBP6;AQP4;GAPDH
Phagocytosis (GO:0006909)	3/59	0.402286	0.669981	0	0	1.3295	1.21064	HMGB1;MERTK;TGM2
Positive Regulation Of Lymphocyte Proliferation (GO:0050671)	3/59	0.402286	0.669981	0	0	1.3295	1.21064	CD80;IRS2;TNFSF13B
Protein N-linked Glycosylation (GO:0006487)	3/59	0.402286	0.669981	0	0	1.3295	1.21064	DPM1;PSMD2;ST3GAL1
Sensory Perception Of Sound (GO:0007605)	4/83	0.402566	0.669981	0	0	1.25671	1.14348	SPTBN4;LHFPL3;TIMM10;SOD1
Protein Localization To Cell Periphery (GO:1990778)	6/132	0.405196	0.669981	0	0	1.18209	1.06788	SPTBN4;ZFYVE27;EHD4;BSG;FLOT1;EMP2
Regulation Of Protein Kinase Activity (GO:0045859)	5/108	0.408543	0.669981	0	0	1.20491	1.07859	MAP2K3;CAMK2N1;PPIA;TARBP2;SOD1
Positive Regulation Of Angiogenesis (GO:0045766)	5/108	0.408543	0.669981	0	0	1.20491	1.07859	SMOC2;HSPB6;SERPINE1;EMP2;VEGFD
Regulation Of Endothelial Cell Apoptotic Process (GO:2000351)	2/36	0.409554	0.669981	0	0	1.45961	1.30297	SERPINE1;NFE2L2
Notch Signaling Pathway (GO:0007219)	2/36	0.409554	0.669981	0	0	1.45961	1.30297	APH1A;TRAF7
Skeletal Muscle Tissue Development (GO:0007519)	2/36	0.409554	0.669981	0	0	1.45961	1.30297	POPDC2;MYL6
Ventricular Septum Development (GO:0003281)	2/36	0.409554	0.669981	0	0	1.45961	1.30297	SMAD7;TGFBR2
Internal Peptidyl-Lysine Acetylation (GO:0018393)	2/36	0.409554	0.669981	0	0	1.45961	1.30297	BAG6;KAT2A
Intracellular Steroid Hormone Receptor Signaling Pathway (GO:0030518)	2/36	0.409554	0.669981	0	0	1.45961	1.30297	DDX5;EGLN2
mRNA Transcription By RNA Polymerase II (GO:0042789)	2/36	0.409554	0.669981	0	0	1.45961	1.30297	TAF13;NR1H2
Melanosome Organization (GO:0032438)	2/36	0.409554	0.669981	0	0	1.45961	1.30297	HPS1;AP1S2
Positive Regulation Of Cell Division (GO:0051781)	2/36	0.409554	0.669981	0	0	1.45961	1.30297	CSPP1;RHOA
Positive Regulation Of Chemokine Production (GO:0032722)	2/36	0.409554	0.669981	0	0	1.45961	1.30297	DDX3X;HMGB1
Protein Acylation (GO:0043543)	2/36	0.409554	0.669981	0	0	1.45961	1.30297	KAT2A;NAA80
DNA Damage Response (GO:0006974)	15/357	0.412271	0.669981	0	0	1.08925	0.965152	BTG2;PHF1;CSNK1E;SIRT7;SPIDR;MAPK12;FBXO31;TNFSF13B;RAD51B;ING2;TRIM28;PAXX;DDIT3;SHLD1;CRY1
Kidney Development (GO:0001822)	3/60	0.412774	0.669981	0	0	1.3061	1.15571	BAG6;CENPF;ZBTB16
Cellular Response To Hormone Stimulus (GO:0032870)	4/85	0.420139	0.669981	0	0	1.22554	1.06275	NR4A3;LMO2;ARID5A;QRFPR
Negative Regulation Of Gene Expression (GO:0010629)	13/309	0.421744	0.669981	0	0	1.09048	0.941474	EXD1;BTG2;DDX3X;IFRD2;SHMT1;PARP10;FLCN;ZFP36;DDRGK1;NOCT;GAPDH;RBMS3;ASB1
Transmembrane Receptor Protein Tyrosine Kinase Signaling Pathway (GO:0007169)	11/259	0.422348	0.669981	0	0	1.1012	0.949149	CNKSR1;ZFYVE27;NR4A3;SHC1;MVP;NAMPT;PIK3R2;VEGFD;IRS2;PTPN11;MERTK
Regulation Of Cytokine-Mediated Signaling Pathway (GO:0001959)	2/37	0.423131	0.669981	0	0	1.41782	1.21943	TBK1;PTPN11
Aortic Valve Development (GO:0003176)	2/37	0.423131	0.669981	0	0	1.41782	1.21943	NPPA;TGFBR2
Cellular Component Disassembly (GO:0022411)	2/37	0.423131	0.669981	0	0	1.41782	1.21943	KIF9;FLOT1
Cyclic-Nucleotide-Mediated Signaling (GO:0019935)	2/37	0.423131	0.669981	0	0	1.41782	1.21943	NPPB;NPPA
Spliceosomal snRNP Assembly (GO:0000387)	2/37	0.423131	0.669981	0	0	1.41782	1.21943	PRMT5;SNRPF
Water-Soluble Vitamin Metabolic Process (GO:0006767)	2/37	0.423131	0.669981	0	0	1.41782	1.21943	GSTO1;SHMT1
Positive Regulation Of ATP-dependent Activity (GO:0032781)	2/37	0.423131	0.669981	0	0	1.41782	1.21943	MYL3;PFN1
Positive Regulation Of Actin Filament Polymerization (GO:0030838)	2/37	0.423131	0.669981	0	0	1.41782	1.21943	PFN1;LMOD2
Positive Regulation Of Cell-Cell Adhesion (GO:0022409)	2/37	0.423131	0.669981	0	0	1.41782	1.21943	FLOT1;SMAD7
Positive Regulation Of Insulin Secretion (GO:0032024)	2/37	0.423131	0.669981	0	0	1.41782	1.21943	IRS2;LRRC8A
Protein Localization To Lysosome (GO:0061462)	2/37	0.423131	0.669981	0	0	1.41782	1.21943	HGS;RTN4
Inorganic Anion Transmembrane Transport (GO:0098661)	3/61	0.423204	0.669981	0	0	1.28351	1.10369	SLC5A6;LRRC8A;SLC12A9
Phosphatidylinositol Metabolic Process (GO:0046488)	3/61	0.423204	0.669981	0	0	1.28351	1.10369	PIP4P1;MTMR14;INPPL1
Regulation Of Cellular Respiration (GO:0043457)	1/14	0.42526	0.669981	0	0	1.90829	1.63169	IFNAR1
2-Oxoglutarate Metabolic Process (GO:0006103)	1/14	0.42526	0.669981	0	0	1.90829	1.63169	IDH2
3'-UTR-mediated mRNA Stabilization (GO:0070935)	1/14	0.42526	0.669981	0	0	1.90829	1.63169	ZFP36
COPII-coated Vesicle Cargo Loading (GO:0090110)	1/14	0.42526	0.669981	0	0	1.90829	1.63169	SAR1A
DNA-templated Transcription Termination (GO:0006353)	1/14	0.42526	0.669981	0	0	1.90829	1.63169	PRMT5
Regulation Of Endothelial Cell Chemotaxis (GO:2001026)	1/14	0.42526	0.669981	0	0	1.90829	1.63169	SMOC2
L-glutamate Import (GO:0051938)	1/14	0.42526	0.669981	0	0	1.90829	1.63169	SLC25A18
L-glutamate Transmembrane Transport (GO:0015813)	1/14	0.42526	0.669981	0	0	1.90829	1.63169	SLC25A18
RNA Phosphodiester Bond Hydrolysis, Endonucleolytic (GO:0090502)	1/14	0.42526	0.669981	0	0	1.90829	1.63169	KHNYN
Regulation Of Hemopoiesis (GO:1903706)	1/14	0.42526	0.669981	0	0	1.90829	1.63169	BRPF3
Regulation Of Histone H3-K4 Methylation (GO:0051569)	1/14	0.42526	0.669981	0	0	1.90829	1.63169	CTNNB1
Regulation Of Integrin Activation (GO:0033623)	1/14	0.42526	0.669981	0	0	1.90829	1.63169	RAP1B
Regulation Of Interleukin-1 Production (GO:0032652)	1/14	0.42526	0.669981	0	0	1.90829	1.63169	HMGB1
Regulation Of Lipoprotein Lipase Activity (GO:0051004)	1/14	0.42526	0.669981	0	0	1.90829	1.63169	NR1H2
Regulation Of Lymphocyte Activation (GO:0051249)	1/14	0.42526	0.669981	0	0	1.90829	1.63169	KAT2A
Regulation Of Multicellular Organism Growth (GO:0040014)	1/14	0.42526	0.669981	0	0	1.90829	1.63169	SOD1
Astrocyte Development (GO:0014002)	1/14	0.42526	0.669981	0	0	1.90829	1.63169	CDK6
Regulation Of Non-Canonical Wnt Signaling Pathway (GO:2000050)	1/14	0.42526	0.669981	0	0	1.90829	1.63169	CSNK1E
Regulation Of Nucleocytoplasmic Transport (GO:0046822)	1/14	0.42526	0.669981	0	0	1.90829	1.63169	SIRT7
Regulation Of Oxidative Phosphorylation (GO:0002082)	1/14	0.42526	0.669981	0	0	1.90829	1.63169	SLC25A33
Cardiac Cell Development (GO:0055006)	1/14	0.42526	0.669981	0	0	1.90829	1.63169	LRRC10
Cell Junction Maintenance (GO:0034331)	1/14	0.42526	0.669981	0	0	1.90829	1.63169	CHCHD10
Regulation Of Sequestering Of Triglyceride (GO:0010889)	1/14	0.42526	0.669981	0	0	1.90829	1.63169	PNPLA2
Central Nervous System Neuron Development (GO:0021954)	1/14	0.42526	0.669981	0	0	1.90829	1.63169	HSP90AA1
Response To Fatty Acid (GO:0070542)	1/14	0.42526	0.669981	0	0	1.90829	1.63169	FOXO3
Detection Of Mechanical Stimulus Involved In Sensory Perception (GO:0050974)	1/14	0.42526	0.669981	0	0	1.90829	1.63169	TMEM120A
Dolichol-Linked Oligosaccharide Biosynthetic Process (GO:0006488)	1/14	0.42526	0.669981	0	0	1.90829	1.63169	DPM1
Ruffle Organization (GO:0031529)	1/14	0.42526	0.669981	0	0	1.90829	1.63169	ARFIP2
Embryonic Cranial Skeleton Morphogenesis (GO:0048701)	1/14	0.42526	0.669981	0	0	1.90829	1.63169	TGFBR2
Endosome To Lysosome Transport Via Multivesicular Body Sorting Pathway (GO:0032510)	1/14	0.42526	0.669981	0	0	1.90829	1.63169	UBXN6
Epiboly Involved In Wound Healing (GO:0090505)	1/14	0.42526	0.669981	0	0	1.90829	1.63169	RHOA
Establishment Of Chromosome Localization (GO:0051303)	1/14	0.42526	0.669981	0	0	1.90829	1.63169	CENPF
Striated Muscle Cell Development (GO:0055002)	1/14	0.42526	0.669981	0	0	1.90829	1.63169	LMOD2
Synaptic Vesicle Membrane Organization (GO:0048499)	1/14	0.42526	0.669981	0	0	1.90829	1.63169	SYNGR2
Folic Acid-Containing Compound Metabolic Process (GO:0006760)	1/14	0.42526	0.669981	0	0	1.90829	1.63169	SHMT1
Transcription By RNA Polymerase I (GO:0006360)	1/14	0.42526	0.669981	0	0	1.90829	1.63169	POLR1E
Ubiquinone Metabolic Process (GO:0006743)	1/14	0.42526	0.669981	0	0	1.90829	1.63169	COQ8B
Keratan Sulfate Metabolic Process (GO:0042339)	1/14	0.42526	0.669981	0	0	1.90829	1.63169	ST3GAL1
Lipoprotein Biosynthetic Process (GO:0042158)	1/14	0.42526	0.669981	0	0	1.90829	1.63169	WDR45
Maturation Of LSU-rRNA From Tricistronic rRNA Transcript (SSU-rRNA, 5.8S rRNA, LSU-rRNA) (GO:0000463)	1/14	0.42526	0.669981	0	0	1.90829	1.63169	FTSJ3
miRNA-mediated Gene Silencing By Inhibition Of Translation (GO:0035278)	1/14	0.42526	0.669981	0	0	1.90829	1.63169	ZFP36
Microvillus Assembly (GO:0030033)	1/14	0.42526	0.669981	0	0	1.90829	1.63169	RAP1B
Multicellular Organismal-Level Water Homeostasis (GO:0050891)	1/14	0.42526	0.669981	0	0	1.90829	1.63169	AQP4
Negative Regulation Of T Cell Receptor Signaling Pathway (GO:0050860)	1/14	0.42526	0.669981	0	0	1.90829	1.63169	PRNP
Negative Regulation Of Cilium Assembly (GO:1902018)	1/14	0.42526	0.669981	0	0	1.90829	1.63169	TCHP
Negative Regulation Of Endoplasmic Reticulum Stress-Induced Intrinsic Apoptotic Signaling Pathway (GO:1902236)	1/14	0.42526	0.669981	0	0	1.90829	1.63169	HERPUD1
Negative Regulation Of Intrinsic Apoptotic Signaling Pathway By P53 Class Mediator (GO:1902254)	1/14	0.42526	0.669981	0	0	1.90829	1.63169	ING2
Negative Regulation Of Peptidyl-Threonine Phosphorylation (GO:0010801)	1/14	0.42526	0.669981	0	0	1.90829	1.63169	SMAD7
Negative Regulation Of Receptor Signaling Pathway Via STAT (GO:1904893)	1/14	0.42526	0.669981	0	0	1.90829	1.63169	HGS
Negative Regulation Of Type I Interferon-Mediated Signaling Pathway (GO:0060339)	1/14	0.42526	0.669981	0	0	1.90829	1.63169	STAT2
Neuron Projection Organization (GO:0106027)	1/14	0.42526	0.669981	0	0	1.90829	1.63169	PRNP
Neurotrophin Signaling Pathway (GO:0038179)	1/14	0.42526	0.669981	0	0	1.90829	1.63169	ZFYVE27
Odontogenesis Of Dentin-Containing Tooth (GO:0042475)	1/14	0.42526	0.669981	0	0	1.90829	1.63169	EDA
Platelet-Derived Growth Factor Receptor Signaling Pathway (GO:0048008)	1/14	0.42526	0.669981	0	0	1.90829	1.63169	NR4A3
Positive Regulation By Host Of Viral Transcription (GO:0043923)	1/14	0.42526	0.669981	0	0	1.90829	1.63169	JUN
Positive Regulation Of Alpha-Beta T Cell Proliferation (GO:0046641)	1/14	0.42526	0.669981	0	0	1.90829	1.63169	TGFBR2
Positive Regulation Of Endothelial Cell Chemotaxis (GO:2001028)	1/14	0.42526	0.669981	0	0	1.90829	1.63169	SMOC2
Positive Regulation Of Epidermal Cell Differentiation (GO:0045606)	1/14	0.42526	0.669981	0	0	1.90829	1.63169	NME2
Positive Regulation Of Histone Acetylation (GO:0035066)	1/14	0.42526	0.669981	0	0	1.90829	1.63169	SF3B1
Positive Regulation Of Isotype Switching (GO:0045830)	1/14	0.42526	0.669981	0	0	1.90829	1.63169	SHLD1
Positive Regulation Of Lymphocyte Migration (GO:2000403)	1/14	0.42526	0.669981	0	0	1.90829	1.63169	RHOA
Positive Regulation Of Muscle Hypertrophy (GO:0014742)	1/14	0.42526	0.669981	0	0	1.90829	1.63169	NR4A3
Positive Regulation Of Nuclear-Transcribed mRNA Catabolic Process, Deadenylation-Dependent Decay (GO:1900153)	1/14	0.42526	0.669981	0	0	1.90829	1.63169	ZFP36
Positive Regulation Of Positive Chemotaxis (GO:0050927)	1/14	0.42526	0.669981	0	0	1.90829	1.63169	VEGFD
Positive Regulation Of Telomerase RNA Localization To Cajal Body (GO:1904874)	1/14	0.42526	0.669981	0	0	1.90829	1.63169	CCT6A
Positive Regulation Of Transcription By RNA Polymerase III (GO:0045945)	1/14	0.42526	0.669981	0	0	1.90829	1.63169	SF3B1
Postsynaptic Membrane Organization (GO:0001941)	1/14	0.42526	0.669981	0	0	1.90829	1.63169	NRXN2
Protein Alpha-1,2-Demannosylation (GO:0036508)	1/14	0.42526	0.669981	0	0	1.90829	1.63169	EDEM2
Protein Localization To Microtubule Organizing Center (GO:1905508)	1/14	0.42526	0.669981	0	0	1.90829	1.63169	MBD1
Regulation Of ATP Biosynthetic Process (GO:2001169)	1/14	0.42526	0.669981	0	0	1.90829	1.63169	FLCN
Endosomal Transport (GO:0016197)	7/160	0.427141	0.672368	0	0	1.13559	0.965978	GGA1;EHD4;AP5Z1;HGS;SQSTM1;VPS16;VAMP3
Positive Regulation Of Nucleic Acid-Templated Transcription (GO:1903508)	21/512	0.427239	0.672368	0	0	1.06218	0.903292	MAP2K3;JUN;CEBPB;SHC1;NR1H2;ZBTB16;CD80;RORC;NME2;FOXO3;RELA;MED12;ING2;KAT2A;KLF6;TRIM28;ELF4;DDIT3;CTNNB1;UBE2V1;MAP2K7
Negative Regulation Of Signal Transduction (GO:0009968)	10/235	0.427656	0.67266	0	0	1.1033	0.937185	BRAP;WWOX;EGFL7;HGS;TMBIM1;INPPL1;CRY1;GPS2;TNS2;GRINA
Regulation Of Peptidyl-Serine Phosphorylation (GO:0033135)	4/86	0.42888	0.673855	0	0	1.21052	1.0248	SPTBN4;HSP90AA1;TBK1;SMAD7
Regulation Of Actin Cytoskeleton Organization (GO:0032956)	4/86	0.42888	0.673855	0	0	1.21052	1.0248	ARHGAP18;TWF1;CLU;RHOA
Cytosolic Transport (GO:0016482)	5/111	0.431619	0.674562	0	0	1.17061	0.983558	MYO1D;GGA1;HOOK2;EMP2;VAMP3
Protein Transport (GO:0015031)	12/286	0.431628	0.674562	0	0	1.08724	0.913487	NAPA;HSPA9;GGA1;CENPF;SAR1A;ARRDC2;STXBP2;RAB24;ARFIP2;TXNIP;CLU;LRP1B
Positive Regulation Of Phosphorylation (GO:0042327)	9/211	0.433336	0.674562	0	0	1.10591	0.924813	MOB3C;FLCN;CCND3;HSP90AA1;PTGES3;FLOT1;VEGFD;MERTK;PPIA
Telomere Maintenance (GO:0000723)	3/62	0.433569	0.674562	0	0	1.26168	1.05439	DCLRE1C;PTGES3;SHLD1
Gland Development (GO:0048732)	3/62	0.433569	0.674562	0	0	1.26168	1.05439	PHF1;MSN;SOD1
Positive Regulation Of Interleukin-6 Production (GO:0032755)	3/62	0.433569	0.674562	0	0	1.26168	1.05439	PTPN11;HMGB1;HSPD1
Regulation Of Interleukin-10 Production (GO:0032653)	2/38	0.436544	0.674562	0	0	1.37836	1.14247	HMGB1;HSPD1
Anterograde Axonal Transport (GO:0008089)	2/38	0.436544	0.674562	0	0	1.37836	1.14247	DLG2;SOD1
Regulation Of Primary Metabolic Process (GO:0080090)	2/38	0.436544	0.674562	0	0	1.37836	1.14247	GPS2;IRS2
Cellular Response To Glucose Starvation (GO:0042149)	2/38	0.436544	0.674562	0	0	1.37836	1.14247	FOXO3;RRP8
Regulation Of Tumor Necrosis Factor-Mediated Signaling Pathway (GO:0010803)	2/38	0.436544	0.674562	0	0	1.37836	1.14247	TBK1;GPS2
Collagen Fibril Organization (GO:0030199)	2/38	0.436544	0.674562	0	0	1.37836	1.14247	ADAMTS2;COLGALT1
Lysosome Organization (GO:0007040)	2/38	0.436544	0.674562	0	0	1.37836	1.14247	HOOK2;HPS1
Negative Regulation Of T Cell Activation (GO:0050868)	2/38	0.436544	0.674562	0	0	1.37836	1.14247	CEBPB;CD80
Negative Regulation Of Viral Genome Replication (GO:0045071)	2/38	0.436544	0.674562	0	0	1.37836	1.14247	RNASEL;RESF1
Positive Regulation Of Cell-Matrix Adhesion (GO:0001954)	2/38	0.436544	0.674562	0	0	1.37836	1.14247	CDK6;EMP2
Protein Deacetylation (GO:0006476)	2/38	0.436544	0.674562	0	0	1.37836	1.14247	HDAC10;SIRT7
Regulation Of Autophagosome Assembly (GO:2000785)	2/38	0.436544	0.674562	0	0	1.37836	1.14247	PHF23;WDR45
Positive Regulation Of Cold-Induced Thermogenesis (GO:0120162)	4/87	0.437587	0.674562	0	0	1.19587	0.988361	PER2;CEBPB;FABP4;GNAS
Canonical Wnt Signaling Pathway (GO:0060070)	3/63	0.443866	0.674562	0	0	1.24058	1.00764	SIAH2;CTNNB1;CSNK1E
3'-UTR-mediated mRNA Destabilization (GO:0061158)	1/15	0.447563	0.674562	0	0	1.77188	1.42449	ZFP36
Regulation Of Cellular Response To Heat (GO:1900034)	1/15	0.447563	0.674562	0	0	1.77188	1.42449	IER5
Regulation Of Fibrinolysis (GO:0051917)	1/15	0.447563	0.674562	0	0	1.77188	1.42449	SERPINE1
Regulation Of Glucose Transmembrane Transport (GO:0010827)	1/15	0.447563	0.674562	0	0	1.77188	1.42449	NR4A3
Regulation Of miRNA-mediated Gene Silencing (GO:0060964)	1/15	0.447563	0.674562	0	0	1.77188	1.42449	ZFP36
Androgen Receptor Signaling Pathway (GO:0030521)	1/15	0.447563	0.674562	0	0	1.77188	1.42449	DDX5
Regulation Of Presynapse Assembly (GO:1905606)	1/15	0.447563	0.674562	0	0	1.77188	1.42449	IL1RAPL1
Regulation Of Presynapse Organization (GO:0099174)	1/15	0.447563	0.674562	0	0	1.77188	1.42449	IL1RAPL1
Cardiac Myofibril Assembly (GO:0055003)	1/15	0.447563	0.674562	0	0	1.77188	1.42449	MYL2
Regulation Of rRNA Processing (GO:2000232)	1/15	0.447563	0.674562	0	0	1.77188	1.42449	SIRT7
Cellular Response To dsRNA (GO:0071359)	1/15	0.447563	0.674562	0	0	1.77188	1.42449	FLOT1
Cellular Response To Estrogen Stimulus (GO:0071391)	1/15	0.447563	0.674562	0	0	1.77188	1.42449	ARID5A
Cellular Response To Gamma Radiation (GO:0071480)	1/15	0.447563	0.674562	0	0	1.77188	1.42449	CRYAB
Cellular Response To Glucocorticoid Stimulus (GO:0071385)	1/15	0.447563	0.674562	0	0	1.77188	1.42449	ZFP36
Cellular Response To Nitrogen Compound (GO:1901699)	1/15	0.447563	0.674562	0	0	1.77188	1.42449	SPIDR
Response To Cadmium Ion (GO:0046686)	1/15	0.447563	0.674562	0	0	1.77188	1.42449	JUN
Response To Interferon-Alpha (GO:0035455)	1/15	0.447563	0.674562	0	0	1.77188	1.42449	IFNAR1
Detection Of Visible Light (GO:0009584)	1/15	0.447563	0.674562	0	0	1.77188	1.42449	RP1
Reticulophagy (GO:0061709)	1/15	0.447563	0.674562	0	0	1.77188	1.42449	DDRGK1
Ribosomal Small Subunit Assembly (GO:0000028)	1/15	0.447563	0.674562	0	0	1.77188	1.42449	RPS27
Sphingolipid Catabolic Process (GO:0030149)	1/15	0.447563	0.674562	0	0	1.77188	1.42449	SMPD2
Stem Cell Development (GO:0048864)	1/15	0.447563	0.674562	0	0	1.77188	1.42449	NOLC1
Sympathetic Nervous System Development (GO:0048485)	1/15	0.447563	0.674562	0	0	1.77188	1.42449	CTNNB1
Synaptic Transmission, Cholinergic (GO:0007271)	1/15	0.447563	0.674562	0	0	1.77188	1.42449	CHRNA10
Fluid Transport (GO:0042044)	1/15	0.447563	0.674562	0	0	1.77188	1.42449	AQP4
Triglyceride Biosynthetic Process (GO:0019432)	1/15	0.447563	0.674562	0	0	1.77188	1.42449	DGAT2
Water Transport (GO:0006833)	1/15	0.447563	0.674562	0	0	1.77188	1.42449	AQP4
Intracellular Sterol Transport (GO:0032366)	1/15	0.447563	0.674562	0	0	1.77188	1.42449	GRAMD1A
miRNA Metabolic Process (GO:0010586)	1/15	0.447563	0.674562	0	0	1.77188	1.42449	DDX5
Muscle Tissue Morphogenesis (GO:0060415)	1/15	0.447563	0.674562	0	0	1.77188	1.42449	ANKRD1
Natural Killer Cell Mediated Cytotoxicity (GO:0042267)	1/15	0.447563	0.674562	0	0	1.77188	1.42449	TUBB4B
Negative Regulation Of ATP-dependent Activity (GO:0032780)	1/15	0.447563	0.674562	0	0	1.77188	1.42449	TNNI3
Negative Regulation Of Peptide Hormone Secretion (GO:0090278)	1/15	0.447563	0.674562	0	0	1.77188	1.42449	MIDN
Negative Regulation Of Phagocytosis (GO:0050765)	1/15	0.447563	0.674562	0	0	1.77188	1.42449	HMGB1
Negative Regulation Of Transposition (GO:0010529)	1/15	0.447563	0.674562	0	0	1.77188	1.42449	SIRT7
Nuclear Chromosome Segregation (GO:0098813)	1/15	0.447563	0.674562	0	0	1.77188	1.42449	CENPF
Nucleosome Disassembly (GO:0006337)	1/15	0.447563	0.674562	0	0	1.77188	1.42449	SSRP1
Polyol Biosynthetic Process (GO:0046173)	1/15	0.447563	0.674562	0	0	1.77188	1.42449	IP6K1
Positive Regulation Of G Protein-Coupled Receptor Signaling Pathway (GO:0045745)	1/15	0.447563	0.674562	0	0	1.77188	1.42449	PRMT5
Positive Regulation Of Autophagosome Assembly (GO:2000786)	1/15	0.447563	0.674562	0	0	1.77188	1.42449	WDR45
Positive Regulation Of Cardiac Muscle Hypertrophy (GO:0010613)	1/15	0.447563	0.674562	0	0	1.77188	1.42449	NR4A3
Positive Regulation Of Cartilage Development (GO:0061036)	1/15	0.447563	0.674562	0	0	1.77188	1.42449	ZBTB16
Positive Regulation Of Cyclin-Dependent Protein Serine/Threonine Kinase Activity (GO:0045737)	1/15	0.447563	0.674562	0	0	1.77188	1.42449	CCND3
Positive Regulation Of Macrophage Activation (GO:0043032)	1/15	0.447563	0.674562	0	0	1.77188	1.42449	HSPD1
Positive Regulation Of Mitotic Sister Chromatid Separation (GO:1901970)	1/15	0.447563	0.674562	0	0	1.77188	1.42449	ANAPC5
Positive Regulation Of Smooth Muscle Cell Migration (GO:0014911)	1/15	0.447563	0.674562	0	0	1.77188	1.42449	NR4A3
Positive Regulation Of Syncytium Formation By Plasma Membrane Fusion (GO:0060143)	1/15	0.447563	0.674562	0	0	1.77188	1.42449	FLOT1
Protein Localization To Cell-Cell Junction (GO:0150105)	1/15	0.447563	0.674562	0	0	1.77188	1.42449	ACTG1
Protein Localization To Endoplasmic Reticulum (GO:0070972)	1/15	0.447563	0.674562	0	0	1.77188	1.42449	DDRGK1
Purine-Containing Compound Biosynthetic Process (GO:0072522)	1/15	0.447563	0.674562	0	0	1.77188	1.42449	SHMT1
Regulation Of RIG-I Signaling Pathway (GO:0039535)	1/15	0.447563	0.674562	0	0	1.77188	1.42449	DDX60
Regulation Of Activin Receptor Signaling Pathway (GO:0032925)	1/15	0.447563	0.674562	0	0	1.77188	1.42449	SMAD7
Regulation Of Adenylate Cyclase Activity (GO:0045761)	1/15	0.447563	0.674562	0	0	1.77188	1.42449	GNAI2
Regulation Of Aerobic Respiration (GO:1903715)	1/15	0.447563	0.674562	0	0	1.77188	1.42449	SLC25A33
Regulation Of Autophagosome Maturation (GO:1901096)	1/15	0.447563	0.674562	0	0	1.77188	1.42449	PHF23
Regulation Of Carbohydrate Metabolic Process (GO:0006109)	1/15	0.447563	0.674562	0	0	1.77188	1.42449	RORC
Regulation Of Cardiac Muscle Contraction By Regulation Of The Release Of Sequestered Calcium Ion (GO:0010881)	1/15	0.447563	0.674562	0	0	1.77188	1.42449	GSTO1
SCF-dependent Proteasomal Ubiquitin-Dependent Protein Catabolic Process (GO:0031146)	2/39	0.449786	0.674562	0	0	1.34103	1.07146	FBXL7;FBXO31
Branching Morphogenesis Of An Epithelial Tube (GO:0048754)	2/39	0.449786	0.674562	0	0	1.34103	1.07146	CTNNB1;TGFBR2
Regulation Of Ubiquitin-Dependent Protein Catabolic Process (GO:2000058)	2/39	0.449786	0.674562	0	0	1.34103	1.07146	RAD23A;CLU
Response To Amino Acid Starvation (GO:1990928)	2/39	0.449786	0.674562	0	0	1.34103	1.07146	FLCN;RNF152
Negative Regulation Of Cysteine-Type Endopeptidase Activity (GO:2000117)	2/39	0.449786	0.674562	0	0	1.34103	1.07146	DDX3X;SIAH2
Negative Regulation Of mRNA Catabolic Process (GO:1902373)	2/39	0.449786	0.674562	0	0	1.34103	1.07146	NOCT;TENT5A
Phosphatidylinositol Phosphate Biosynthetic Process (GO:0046854)	2/39	0.449786	0.674562	0	0	1.34103	1.07146	PIK3R2;IP6K1
Positive Regulation Of Blood Vessel Endothelial Cell Migration (GO:0043536)	2/39	0.449786	0.674562	0	0	1.34103	1.07146	MAP2K3;HMGB1
Positive Regulation Of Intracellular Transport (GO:0032388)	2/39	0.449786	0.674562	0	0	1.34103	1.07146	MBD1;OAZ1
Positive Regulation Of Receptor-Mediated Endocytosis (GO:0048260)	2/39	0.449786	0.674562	0	0	1.34103	1.07146	SERPINE1;CLU
Regulation Of B Cell Proliferation (GO:0030888)	2/39	0.449786	0.674562	0	0	1.34103	1.07146	IRS2;TNFSF13B
Peptidyl-Serine Modification (GO:0018209)	7/164	0.452496	0.678277	0	0	1.1064	0.877344	TBK1;DMPK;CDK2;MKNK2;CSNK1E;MAPK12;TGFBR2
Peptidyl-Threonine Modification (GO:0018210)	3/64	0.454087	0.68018	0	0	1.22017	0.963283	TBK1;CDC42BPG;TGFBR2
Regulation Of Interleukin-12 Production (GO:0032655)	2/40	0.462849	0.68018	0	0	1.30566	1.00582	HMGB1;HSPD1
Amino Acid Transmembrane Transport (GO:0003333)	2/40	0.462849	0.68018	0	0	1.30566	1.00582	SLC6A6;SLC25A18
Cellular Response To Amino Acid Starvation (GO:0034198)	2/40	0.462849	0.68018	0	0	1.30566	1.00582	FLCN;RNF152
Cellular Response To Chemokine (GO:1990869)	2/40	0.462849	0.68018	0	0	1.30566	1.00582	DUSP1;RHOA
Regulation Of Wound Healing (GO:0061041)	2/40	0.462849	0.68018	0	0	1.30566	1.00582	SERPINE1;SRSF6
Hexose Metabolic Process (GO:0019318)	2/40	0.462849	0.68018	0	0	1.30566	1.00582	IRS2;ALDOA
Intracellular Glucose Homeostasis (GO:0001678)	2/40	0.462849	0.68018	0	0	1.30566	1.00582	PIK3R2;LRRC8A
Regulation Of Canonical Wnt Signaling Pathway (GO:0060828)	8/191	0.462984	0.68018	0	0	1.08473	0.835308	LMBR1L;DDX3X;FRMD8;DDIT3;SIAH2;CTNND1;CSNK1E;RBMS3
Cell Junction Assembly (GO:0034329)	4/90	0.463462	0.68018	0	0	1.15395	0.88742	FLCN;CTNND1;NRXN2;RHOA
Transforming Growth Factor Beta Receptor Signaling Pathway (GO:0007179)	3/65	0.46423	0.68018	0	0	1.20042	0.921173	JUN;TGFBR2;SMAD7
DNA Modification (GO:0006304)	1/16	0.469001	0.68018	0	0	1.65366	1.25207	NEIL2
Regulation Of Establishment Of Cell Polarity (GO:2000114)	1/16	0.469001	0.68018	0	0	1.65366	1.25207	RAP1B
Regulation Of Exosomal Secretion (GO:1903541)	1/16	0.469001	0.68018	0	0	1.65366	1.25207	HGS
Regulation Of Fatty Acid Oxidation (GO:0046320)	1/16	0.469001	0.68018	0	0	1.65366	1.25207	NR4A3
Regulation Of Megakaryocyte Differentiation (GO:0045652)	1/16	0.469001	0.68018	0	0	1.65366	1.25207	SCIN
Amyloid Precursor Protein Metabolic Process (GO:0042982)	1/16	0.469001	0.68018	0	0	1.65366	1.25207	APH1A
Anterior/Posterior Axis Specification (GO:0009948)	1/16	0.469001	0.68018	0	0	1.65366	1.25207	DDIT3
Aorta Morphogenesis (GO:0035909)	1/16	0.469001	0.68018	0	0	1.65366	1.25207	TGFBR2
Regulation Of Osteoblast Proliferation (GO:0033688)	1/16	0.469001	0.68018	0	0	1.65366	1.25207	RHOA
Carbohydrate Derivative Transport (GO:1901264)	1/16	0.469001	0.68018	0	0	1.65366	1.25207	SLC15A2
Cellular Response To Cadmium Ion (GO:0071276)	1/16	0.469001	0.68018	0	0	1.65366	1.25207	JUN
Regulation Of Synaptic Transmission, GABAergic (GO:0032228)	1/16	0.469001	0.68018	0	0	1.65366	1.25207	SYN3
Regulation Of Synaptic Vesicle Exocytosis (GO:2000300)	1/16	0.469001	0.68018	0	0	1.65366	1.25207	RAP1B
Cellular Response To Interferon-Beta (GO:0035458)	1/16	0.469001	0.68018	0	0	1.65366	1.25207	IFNAR1
Regulation Of Triglyceride Biosynthetic Process (GO:0010866)	1/16	0.469001	0.68018	0	0	1.65366	1.25207	NR1H2
Regulation Of Vascular Endothelial Cell Proliferation (GO:1905562)	1/16	0.469001	0.68018	0	0	1.65366	1.25207	HMGB1
Regulation Of Viral Life Cycle (GO:1903900)	1/16	0.469001	0.68018	0	0	1.65366	1.25207	PPIA
Response To Ethanol (GO:0045471)	1/16	0.469001	0.68018	0	0	1.65366	1.25207	SOD1
Sensory Perception Of Chemical Stimulus (GO:0007606)	1/16	0.469001	0.68018	0	0	1.65366	1.25207	GNAS
Energy Reserve Metabolic Process (GO:0006112)	1/16	0.469001	0.68018	0	0	1.65366	1.25207	PHKG2
Sulfur Amino Acid Metabolic Process (GO:0000096)	1/16	0.469001	0.68018	0	0	1.65366	1.25207	CTH
fatty-acyl-CoA Metabolic Process (GO:0035337)	1/16	0.469001	0.68018	0	0	1.65366	1.25207	DGAT2
Gastrulation (GO:0007369)	1/16	0.469001	0.68018	0	0	1.65366	1.25207	NR4A3
Intracellular Lipid Transport (GO:0032365)	1/16	0.469001	0.68018	0	0	1.65366	1.25207	GRAMD1A
Intrinsic Apoptotic Signaling Pathway In Response To DNA Damage By P53 Class Mediator (GO:0042771)	1/16	0.469001	0.68018	0	0	1.65366	1.25207	BAG6
Maintenance Of Protein Localization In Organelle (GO:0072595)	1/16	0.469001	0.68018	0	0	1.65366	1.25207	CHCHD10
Maturation Of 5.8S rRNA (GO:0000460)	1/16	0.469001	0.68018	0	0	1.65366	1.25207	FTSJ3
Negative Regulation Of Fibroblast Proliferation (GO:0048147)	1/16	0.469001	0.68018	0	0	1.65366	1.25207	PARP10
Negative Regulation Of Interleukin-1 Beta Production (GO:0032691)	1/16	0.469001	0.68018	0	0	1.65366	1.25207	ELF4
Negative Regulation Of Interleukin-8 Production (GO:0032717)	1/16	0.469001	0.68018	0	0	1.65366	1.25207	ANXA4
Negative Regulation Of Monoatomic Ion Transport (GO:0043271)	1/16	0.469001	0.68018	0	0	1.65366	1.25207	WNK4
Negative Regulation Of Nervous System Development (GO:0051961)	1/16	0.469001	0.68018	0	0	1.65366	1.25207	MBD1
Negative Regulation Of Phosphatase Activity (GO:0010923)	1/16	0.469001	0.68018	0	0	1.65366	1.25207	CRY2
Negative Regulation Of Receptor Signaling Pathway Via JAK-STAT (GO:0046426)	1/16	0.469001	0.68018	0	0	1.65366	1.25207	HGS
Negative Regulation Of Reproductive Process (GO:2000242)	1/16	0.469001	0.68018	0	0	1.65366	1.25207	DUSP1
Neural Tube Development (GO:0021915)	1/16	0.469001	0.68018	0	0	1.65366	1.25207	ARL13B
Phosphatidylinositol Dephosphorylation (GO:0046856)	1/16	0.469001	0.68018	0	0	1.65366	1.25207	PIP4P1
Positive Regulation Of Dendrite Morphogenesis (GO:0050775)	1/16	0.469001	0.68018	0	0	1.65366	1.25207	IL1RAPL1
Positive Regulation Of Epithelial Cell Differentiation (GO:0030858)	1/16	0.469001	0.68018	0	0	1.65366	1.25207	TMEM100
Positive Regulation Of Extracellular Matrix Organization (GO:1903055)	1/16	0.469001	0.68018	0	0	1.65366	1.25207	COLGALT1
Positive Regulation Of Heart Rate (GO:0010460)	1/16	0.469001	0.68018	0	0	1.65366	1.25207	NPPA
Positive Regulation Of Interleukin-4 Production (GO:0032753)	1/16	0.469001	0.68018	0	0	1.65366	1.25207	CEBPB
Positive Regulation Of Leukocyte Activation (GO:0002696)	1/16	0.469001	0.68018	0	0	1.65366	1.25207	HSPD1
Positive Regulation Of Potassium Ion Transmembrane Transport (GO:1901381)	1/16	0.469001	0.68018	0	0	1.65366	1.25207	NPPA
Positive Regulation Of Small GTPase Mediated Signal Transduction (GO:0051057)	1/16	0.469001	0.68018	0	0	1.65366	1.25207	TGM2
Positive Regulation Of Telomere Capping (GO:1904355)	1/16	0.469001	0.68018	0	0	1.65366	1.25207	MAP2K7
Positive Regulation Of Transcription Regulatory Region DNA Binding (GO:2000679)	1/16	0.469001	0.68018	0	0	1.65366	1.25207	DDRGK1
Protein O-linked Mannosylation (GO:0035269)	1/16	0.469001	0.68018	0	0	1.65366	1.25207	DPM1
Protein Heterooligomerization (GO:0051291)	1/16	0.469001	0.68018	0	0	1.65366	1.25207	TMEM120A
Protein Localization To Centrosome (GO:0071539)	1/16	0.469001	0.68018	0	0	1.65366	1.25207	MBD1
Protein Targeting To Peroxisome (GO:0006625)	1/16	0.469001	0.68018	0	0	1.65366	1.25207	PEX6
Regulation Of Brown Fat Cell Differentiation (GO:0090335)	1/16	0.469001	0.68018	0	0	1.65366	1.25207	FLCN
[truncated: 903 more rows]

## Sheet: CM_ALDO_down
Term	Overlap	P-value	Adjusted P-value	Old P-value	Old Adjusted P-value	Odds Ratio	Combined Score	Genes
Regulation Of Axon Regeneration (GO:0048679)	4/10	8.97553e-06	0.0148635	0	0	45.3127	526.58	RTN4R;EPHA4;STK24;RTN4RL1
Negative Regulation Of Axon Regeneration (GO:0048681)	3/5	3.08197e-05	0.0168272	0	0	101.585	1055.2	RTN4R;EPHA4;RTN4RL1
Negative Regulation Of Neuron Projection Regeneration (GO:0070571)	3/5	3.08197e-05	0.0168272	0	0	101.585	1055.2	RTN4R;EPHA4;RTN4RL1
Regulation Of Cell Communication (GO:0010646)	6/46	5.48225e-05	0.0168272	0	0	10.2549	100.615	RYR2;GRK5;CASQ2;ITGB6;SLC8A1;MGLL
Cellular Response To Caffeine (GO:0071313)	3/6	6.09681e-05	0.0168272	0	0	67.7192	657.226	RYR2;CASQ2;SLC8A1
Response To Caffeine (GO:0031000)	3/6	6.09681e-05	0.0168272	0	0	67.7192	657.226	RYR2;CASQ2;SLC8A1
Cellular Response To Alkaloid (GO:0071312)	4/16	7.25514e-05	0.0171636	0	0	22.6486	215.869	RYR2;CASQ2;CACNA1S;SLC8A1
Transmembrane Receptor Protein Tyrosine Kinase Signaling Pathway (GO:0007169)	13/259	0.000127141	0.0253712	0	0	3.67044	32.9246	EPHA4;ANGPT1;IRS1;SULF2;DDIT4;PDGFC;FGF18;PDK4;ROR1;PRKD1;EPHB1;FRK;FGFR1
Regulation Of Insulin Secretion (GO:0050796)	7/77	0.000137887	0.0253712	0	0	6.85156	60.904	IRS1;GIPR;ALOX5;MYRIP;ADCY8;CLOCK;SOX4
Positive Regulation Of Bone Mineralization (GO:0030501)	5/36	0.000172394	0.0262881	0	0	10.9896	95.2331	FBN2;ALOX5;ANO6;BMP7;SLC8A1
Negative Regulation Of Response To Wounding (GO:1903035)	4/20	0.000184389	0.0262881	0	0	16.9826	146.025	RTN4R;EPHA4;RTN4RL1;ALOX5
Regulation Of Endothelial Cell Migration (GO:0010594)	7/82	0.000204819	0.0262881	0	0	6.39297	54.2979	BMPER;ANGPT1;PROX1;PRKD1;SLIT2;PLPP3;ADAMTS9
Kidney Development (GO:0001822)	6/60	0.000246757	0.0262881	0	0	7.59014	63.0521	MME;GDNF;PROX1;BMP7;SOX4;SULF2
Cellular Response To Purine-Containing Compound (GO:0071415)	3/9	0.0002478	0.0262881	0	0	33.8538	281.085	RYR2;CASQ2;SLC8A1
Motor Neuron Axon Guidance (GO:0008045)	3/9	0.0002478	0.0262881	0	0	33.8538	281.085	EPHA4;SEMA3A;SLIT2
Positive Regulation Of Ossification (GO:0045778)	5/39	0.000253991	0.0262881	0	0	10.0182	82.9331	FBN2;ALOX5;ANO6;BMP7;SLC8A1
Neuron Projection Development (GO:0031175)	10/176	0.00028637	0.0278958	0	0	4.15353	33.8855	LGI1;EPHA4;GDNF;EPB41L3;TMEM108;MAPT;EPHB1;BMP7;SH3GL2;HDGFL3
Positive Regulation Of Biomineral Tissue Development (GO:0070169)	5/41	0.00032277	0.0296948	0	0	9.46059	76.0497	FBN2;ALOX5;ANO6;BMP7;SLC8A1
Regulation Of G Protein-Coupled Receptor Signaling Pathway (GO:0008277)	6/64	0.000351872	0.0306684	0	0	7.06507	56.1832	KCTD8;GRK5;RGS12;RPGRIP1L;RGS6;MGLL
Negative Regulation Of Vascular Permeability (GO:0043116)	3/11	0.000476235	0.0394323	0	0	25.3875	194.204	DDAH1;SLIT2;SH3GL2
Negative Regulation Of Phosphorylation (GO:0042326)	6/71	0.000617016	0.0486561	0	0	6.30171	46.5735	MAPT;SLIT2;PLPP3;BMP7;SH3GL2;ZBED3
Regulation Of Cell Migration (GO:0030334)	15/388	0.000661972	0.0498284	0	0	2.79507	20.4607	EPHA4;DUSP3;TET1;SORL1;DACH1;KIF2A;STK24;DAAM2;PDGFC;FGF18;CDH11;ANGPTL3;MGAT3;SLIT2;PLXNA4
Positive Regulation Of Endothelial Cell Migration (GO:0010595)	6/74	0.000769386	0.0553958	0	0	6.02266	43.182	ANGPT1;FGF18;PROX1;PRKD1;PLPP3;FGFR1
Neuron Migration (GO:0001764)	5/50	0.000819512	0.0565463	0	0	7.5646	53.7601	SEMA3A;DDIT4;NDNF;MARK1;FGFR1
Autonomic Nervous System Development (GO:0048483)	3/14	0.0010168	0.0647624	0	0	18.4605	127.213	GDNF;SEMA3A;SOX4
Positive Regulation Of Endothelial Cell Chemotaxis (GO:2001028)	3/14	0.0010168	0.0647624	0	0	18.4605	127.213	FGF18;PRKD1;FGFR1
Axon Guidance (GO:0007411)	8/139	0.00105962	0.0649899	0	0	4.18596	28.6732	LGI1;EPHA4;GDNF;SEMA3A;FEZ2;SLIT2;EPHB1;PLXNA4
Regulation Of Bone Mineralization (GO:0030500)	5/54	0.00116625	0.0678006	0	0	6.9455	46.9096	FBN2;ALOX5;ANO6;BMP7;SLC8A1
Sympathetic Nervous System Development (GO:0048485)	3/15	0.00125724	0.0678006	0	0	16.9212	113.014	GDNF;SEMA3A;SOX4
Regulation Of Cardiac Muscle Contraction By Regulation Of The Release Of Sequestered Calcium Ion (GO:0010881)	3/15	0.00125724	0.0678006	0	0	16.9212	113.014	RYR2;CASQ2;SLC8A1
Histamine Metabolic Process (GO:0001692)	2/4	0.00126921	0.0678006	0	0	67.4636	449.939	SLC22A3;HNMT
Long-Chain Fatty Acid Metabolic Process (GO:0001676)	5/61	0.00201856	0.093849	0	0	6.07489	37.697	ELOVL5;ALOX5;PNPLA3;ACSL3;MGLL
Synaptic Vesicle Endocytosis (GO:0048488)	4/37	0.002066	0.093849	0	0	8.22604	50.8546	SYT2;STON2;SH3GL2;SNAP91
Cell-Cell Signaling Involved In Cardiac Conduction (GO:0086019)	2/5	0.00209482	0.093849	0	0	44.9732	277.408	RYR2;CASQ2
Dendrite Extension (GO:0097484)	2/5	0.00209482	0.093849	0	0	44.9732	277.408	TMEM108;SH3GL2
Retinal Ganglion Cell Axon Guidance (GO:0031290)	2/5	0.00209482	0.093849	0	0	44.9732	277.408	SLIT2;EPHB1
Negative Regulation Of Cell Motility (GO:2000146)	7/121	0.00209687	0.093849	0	0	4.19655	25.8814	EPHA4;DACH1;DUSP3;STK24;CDH11;TET1;SLIT2
Positive Regulation Of Blood Vessel Endothelial Cell Migration (GO:0043536)	4/39	0.00251455	0.108855	0	0	7.7551	46.4194	ANGPT1;FGF18;PRKD1;FGFR1
Regulation Of Cardiac Muscle Contraction By Calcium Ion Signaling (GO:0010882)	3/19	0.00256362	0.108855	0	0	12.688	75.7007	RYR2;CASQ2;SLC8A1
Cellular Response To Nerve Growth Factor Stimulus (GO:1990090)	3/20	0.00298349	0.114512	0	0	11.941	69.4326	TMEM108;MAPT;SH3GL2
Regulation Of Cellular Response To Hypoxia (GO:1900037)	2/6	0.00311175	0.114512	0	0	33.728	194.697	EPHA4;DDAH1
Regulation Of Endothelial Cell Chemotaxis To Fibroblast Growth Factor (GO:2000544)	2/6	0.00311175	0.114512	0	0	33.728	194.697	FGF18;FGFR1
Axon Extension Involved In Axon Guidance (GO:0048846)	2/6	0.00311175	0.114512	0	0	33.728	194.697	SEMA3A;SLIT2
Regulation Of Skeletal Muscle Satellite Cell Proliferation (GO:0014842)	2/6	0.00311175	0.114512	0	0	33.728	194.697	ANGPT1;EPHB1
Neuron Projection Extension Involved In Neuron Projection Guidance (GO:1902284)	2/6	0.00311175	0.114512	0	0	33.728	194.697	SEMA3A;SLIT2
Cell-Matrix Adhesion (GO:0007160)	6/99	0.0034333	0.121318	0	0	4.39739	24.9518	COL13A1;CDH11;ANGPTL3;ITGB6;ADAMTS9;ITGA9
Regulation Of Release Of Sequestered Calcium Ion Into Cytosol By Sarcoplasmic Reticulum (GO:0010880)	3/21	0.00344321	0.121318	0	0	11.2769	63.9554	RYR2;CASQ2;SLC8A1
Regulation Of Neuron Projection Development (GO:0010975)	8/169	0.0036078	0.124469	0	0	3.40012	19.1245	RTN4R;EPHA4;RTN4RL1;SEMA3A;ROR1;NDNF;PRKD1;MARK1
Positive Regulation Of Cell Differentiation (GO:0045597)	10/248	0.00381303	0.127167	0	0	2.88504	16.0678	CDS1;FBN2;GDNF;ASB4;PRKD1;GDPD5;BMP7;SOX4;ZFP36L1;FGFR1
Positive Regulation Of Cellular Process (GO:0048522)	16/511	0.00383958	0.127167	0	0	2.23973	12.4582	LGI1;EPHA4;RYR2;TSC22D1;IRS1;PROX1;ZFP36L1;MEIS1;GRK5;GDNF;PDGFC;FGF18;MAPT;TEAD1;SOX4;FGFR1
Acylglycerol Catabolic Process (GO:0046464)	3/22	0.00394393	0.128062	0	0	10.6828	59.1354	ABHD2;PNPLA3;MGLL
Positive Regulation Of Fat Cell Differentiation (GO:0045600)	4/45	0.00425242	0.1348	0	0	6.61795	36.1358	CDS1;RREB1;BMP7;ZFP36L1
Sialylation (GO:0097503)	2/7	0.00431424	0.1348	0	0	26.9808	146.933	ST6GAL1;ST3GAL4
Cellular Lipid Catabolic Process (GO:0044242)	3/23	0.0044867	0.137592	0	0	10.1481	54.867	ANGPTL3;PLBD1;LPIN1
Negative Regulation Of Response To Stimulus (GO:0048585)	4/46	0.00460445	0.138017	0	0	6.46001	34.7596	EPHA4;DDAH1;ALOX5;SLIT2
Regulation Of Signal Transduction (GO:0009966)	8/178	0.0049266	0.138017	0	0	3.21845	17.1	KCTD8;GRK5;GDNF;TMEM108;RGS12;PRKD1;MGLL;RGS6
Negative Regulation Of Protein Modification Process (GO:0031400)	5/75	0.00496064	0.138017	0	0	4.85604	25.7672	MAPT;SLIT2;PLPP3;SH3GL2;ZBED3
Negative Regulation Of Cell Projection Organization (GO:0031345)	4/47	0.00497557	0.138017	0	0	6.30942	33.4602	RTN4R;EPHA4;RTN4RL1;SEMA3A
Regulation Of Blood Vessel Endothelial Cell Migration (GO:0043535)	4/47	0.00497557	0.138017	0	0	6.30942	33.4602	ANGPT1;FGF18;PRKD1;FGFR1
Neuron Development (GO:0048666)	7/144	0.0054951	0.138017	0	0	3.48743	18.1482	LGI1;SRRM4;GDNF;TMEM108;MAPT;SH3GL2;HDGFL3
Receptor-Mediated Endocytosis (GO:0006898)	6/109	0.00549719	0.138017	0	0	3.96819	20.6486	RAB31;TMEM108;ACKR3;STON2;SORL1;SNAP91
Response To Insulin (GO:0032868)	5/77	0.00554607	0.138017	0	0	4.72061	24.522	RAB31;IRS1;LPIN1;ZFP36L1;ZBED3
Regulation Of Protein Localization To Early Endosome (GO:1902965)	2/8	0.00569665	0.138017	0	0	22.4828	116.188	MGAT3;SORL1
Leucine Transport (GO:0015820)	2/8	0.00569665	0.138017	0	0	22.4828	116.188	SLC43A2;SLC6A17
Positive Regulation Of Protein Localization To Early Endosome (GO:1902966)	2/8	0.00569665	0.138017	0	0	22.4828	116.188	MGAT3;SORL1
Positive Regulation Of Protein Localization To Endosome (GO:1905668)	2/8	0.00569665	0.138017	0	0	22.4828	116.188	MGAT3;SORL1
Regulation Of Aspartic-Type Endopeptidase Activity Involved In Amyloid Precursor Protein Catabolic Process (GO:1902959)	2/8	0.00569665	0.138017	0	0	22.4828	116.188	EPHA4;SORL1
Nervous System Development (GO:0007399)	13/394	0.00577186	0.138017	0	0	2.35146	12.1212	KIRREL3;LGI1;IGSF8;SRRM4;PROX1;GDNF;NINJ2;FEZ2;PDGFC;IGF2BP2;EPHB1;SOX4;SH3GL2
Negative Regulation Of Neuron Projection Development (GO:0010977)	4/49	0.00577688	0.138017	0	0	6.02831	31.0693	RTN4R;EPHA4;RTN4RL1;SEMA3A
Glucose Homeostasis (GO:0042593)	5/78	0.00585635	0.138017	0	0	4.65568	23.9312	IRS1;ALOX5;PDK4;ADCY8;SOX4
Cellular Response To Growth Factor Stimulus (GO:0071363)	7/146	0.00591739	0.138017	0	0	3.43685	17.6306	DUSP3;HJV;NDNF;PRKD1;MAPT;BMP7;ZFP36L1
Negative Regulation Of Cell Migration (GO:0030336)	7/147	0.00613741	0.141161	0	0	3.41211	17.3791	EPHA4;DACH1;DUSP3;STK24;CDH11;TET1;SLIT2
Ventricular Septum Morphogenesis (GO:0060412)	3/26	0.00637678	0.142702	0	0	8.82291	44.6006	SLIT2;PROX1;SOX4
Microtubule Polymerization Or Depolymerization (GO:0031109)	3/26	0.00637678	0.142702	0	0	8.82291	44.6006	KIF2A;MAPT;HDGFL3
Integrin-Mediated Signaling Pathway (GO:0007229)	5/80	0.00651325	0.142997	0	0	4.53101	22.8087	ANGPTL3;ITGB6;PRKD1;PLPP3;ITGA9
Chordate Embryonic Development (GO:0043009)	4/52	0.00713308	0.142997	0	0	5.65058	27.9309	PROX1;BMP7;SULF2;FGFR1
Regulation Of Cellular Response To Oxidative Stress (GO:1900407)	2/9	0.00725347	0.142997	0	0	19.2698	94.9285	ALOX5;BMP7
Axon Regeneration (GO:0031103)	2/9	0.00725347	0.142997	0	0	19.2698	94.9285	RTN4RL1;NREP
Branched-Chain Amino Acid Transport (GO:0015803)	2/9	0.00725347	0.142997	0	0	19.2698	94.9285	SLC43A2;SLC6A17
Calcium Ion Transport Into Cytosol (GO:0060402)	2/9	0.00725347	0.142997	0	0	19.2698	94.9285	RYR2;SLC8A1
Cellular Response To Fatty Acid (GO:0071398)	2/9	0.00725347	0.142997	0	0	19.2698	94.9285	IRS1;PDK4
Glomerular Filtration (GO:0003094)	2/9	0.00725347	0.142997	0	0	19.2698	94.9285	MYO1E;SULF2
Neuron Projection Regeneration (GO:0031102)	2/9	0.00725347	0.142997	0	0	19.2698	94.9285	RTN4RL1;NREP
Positive Regulation Of Phagocytosis, Engulfment (GO:0060100)	2/9	0.00725347	0.142997	0	0	19.2698	94.9285	RAB31;ANO6
Neuron Projection Guidance (GO:0097485)	6/116	0.00740195	0.144207	0	0	3.71418	18.2218	LGI1;EPHA4;SEMA3A;FEZ2;SLIT2;EPHB1
Cellular Response To Fibroblast Growth Factor Stimulus (GO:0044344)	4/53	0.00762795	0.146882	0	0	5.53495	26.988	FGF18;NDNF;ZFP36L1;FGFR1
Regulation Of Long-Term Synaptic Potentiation (GO:1900271)	3/28	0.00786326	0.147644	0	0	8.11615	39.3273	EPHA4;ADCY1;ADCY8
Positive Regulation Of Lipid Kinase Activity (GO:0090218)	3/28	0.00786326	0.147644	0	0	8.11615	39.3273	IRS1;MAPT;PRKD1
Cellular Response To Peptide Hormone Stimulus (GO:0071375)	5/84	0.00797892	0.147644	0	0	4.30061	20.776	RAB31;IRS1;ADCY8;LPIN1;ZFP36L1
Regulation Of Anatomical Structure Morphogenesis (GO:0022603)	6/118	0.00802413	0.147644	0	0	3.64744	17.6	EPHA4;BMPER;GDNF;MAPT;TSPAN12;SH3D19
Negative Regulation Of Chemotaxis (GO:0050922)	3/29	0.00867657	0.154893	0	0	7.80355	37.0445	DUSP3;SEMA3A;SLIT2
Membrane Lipid Biosynthetic Process (GO:0046467)	4/55	0.00868428	0.154893	0	0	5.31728	25.2371	ELOVL5;ST3GAL4;PRKD1;PLPP3
Regulation Of Phagocytosis, Engulfment (GO:0060099)	2/10	0.00897931	0.154893	0	0	16.8602	79.4591	RAB31;ANO6
Central Nervous System Projection Neuron Axonogenesis (GO:0021952)	2/10	0.00897931	0.154893	0	0	16.8602	79.4591	EPHA4;EPHB1
Negative Regulation Of Smooth Muscle Cell Migration (GO:0014912)	2/10	0.00897931	0.154893	0	0	16.8602	79.4591	SLIT2;PRKG1
Positive Regulation Of Insulin Receptor Signaling Pathway (GO:0046628)	2/10	0.00897931	0.154893	0	0	16.8602	79.4591	IRS1;SORL1
Regulation Of Endothelial Cell Proliferation (GO:0001936)	5/87	0.00921828	0.157376	0	0	4.14256	19.4144	ANGPT1;ALOX5;FGF18;PROX1;PRKD1
Positive Regulation Of Epithelial Cell Migration (GO:0010634)	5/88	0.00965928	0.163222	0	0	4.09242	18.9881	ANGPT1;PROX1;PRKD1;PLPP3;RREB1
Phosphatidylinositol-Mediated Signaling (GO:0048015)	4/58	0.0104408	0.168214	0	0	5.02102	22.9061	INPP5A;IRS1;ZFP36L1;FGFR1
Cardiac Muscle Contraction (GO:0060048)	3/31	0.0104463	0.168214	0	0	7.24533	33.0497	RYR2;CASQ2;SLC8A1
Regulation Of Protein Polymerization (GO:0032271)	3/31	0.0104463	0.168214	0	0	7.24533	33.0497	DAAM2;MAPT;MEGF9
NADPH Regeneration (GO:0006740)	2/11	0.0108689	0.168214	0	0	14.986	67.7642	H6PD;ALDH1L2
Regulation Of Monooxygenase Activity (GO:0032768)	2/11	0.0108689	0.168214	0	0	14.986	67.7642	DDAH1;GDNF
Biogenic Amine Metabolic Process (GO:0006576)	2/11	0.0108689	0.168214	0	0	14.986	67.7642	SLC22A3;HNMT
Regulation Of Vascular Associated Smooth Muscle Cell Migration (GO:1904752)	2/11	0.0108689	0.168214	0	0	14.986	67.7642	DOCK4;PRKG1
Renal Filtration (GO:0097205)	2/11	0.0108689	0.168214	0	0	14.986	67.7642	MYO1E;SULF2
Positive Regulation Of Cellular Response To Insulin Stimulus (GO:1900078)	2/11	0.0108689	0.168214	0	0	14.986	67.7642	IRS1;SORL1
Plasma Membrane Bounded Cell Projection Organization (GO:0120036)	6/127	0.0112955	0.173197	0	0	3.37441	15.1287	LGI1;GDNF;TMEM108;MAPT;SH3GL2;HDGFL3
Regulation Of Sprouting Angiogenesis (GO:1903670)	3/32	0.0114037	0.173252	0	0	6.99509	31.2948	BMPER;ALOX5;FGF18
Phosphate-Containing Compound Metabolic Process (GO:0006796)	7/166	0.0115804	0.174338	0	0	3.00111	13.3802	INPP4B;SLC22A3;INPP5A;DUSP3;ANGPTL3;HNMT;PLPP3
Regulation Of ERK1 And ERK2 Cascade (GO:0070372)	8/207	0.0117603	0.17545	0	0	2.74486	12.1955	EPHA4;DUSP3;BMPER;ANGPT1;PDGFC;ACKR3;ROR1;EPHB1
Cellular Response To Insulin Stimulus (GO:0032869)	5/93	0.0120829	0.17782	0	0	3.85879	17.0403	RAB31;IRS1;PDK4;LPIN1;ZFP36L1
Regulation Of Macromolecule Metabolic Process (GO:0060255)	6/129	0.0121339	0.17782	0	0	3.31916	14.6433	GDNF;ALPK2;PROX1;IGF2BP2;SLC8A1;ZFP36L1
Regulation Of Axon Extension (GO:0030516)	3/33	0.01241	0.178255	0	0	6.76154	29.6781	RTN4R;SEMA3A;MAPT
Second-Messenger-Mediated Signaling (GO:0019932)	4/61	0.0124122	0.178255	0	0	4.75594	20.8742	RYR2;INPP5A;DDAH1;NDNF
Calcium Ion Import (GO:0070509)	2/12	0.0129171	0.178255	0	0	13.4866	58.656	SLC24A2;SLC8A1
Detection Of Calcium Ion (GO:0005513)	2/12	0.0129171	0.178255	0	0	13.4866	58.656	RYR2;CASQ2
Semaphorin-Plexin Signaling Pathway Involved In Neuron Projection Guidance (GO:1902285)	2/12	0.0129171	0.178255	0	0	13.4866	58.656	SEMA3A;PLXNA4
Organophosphate Catabolic Process (GO:0046434)	2/12	0.0129171	0.178255	0	0	13.4866	58.656	ANGPTL3;PLBD1
Regulation Of Cell Communication By Electrical Coupling (GO:0010649)	2/12	0.0129171	0.178255	0	0	13.4866	58.656	CASQ2;SLC8A1
Positive Regulation Of Cell Growth (GO:0030307)	5/95	0.0131582	0.180083	0	0	3.77261	16.3381	RNF157;LGI1;SYT2;MAPT;TEAD1
Skeletal System Development (GO:0001501)	6/132	0.0134722	0.182869	0	0	3.23958	13.9533	COL13A1;NPR3;CDH11;BMP7;FGFR1;SULF2
Calcium Ion Import Across Plasma Membrane (GO:0098703)	3/35	0.0145709	0.191978	0	0	6.33822	26.8026	SLC24A2;CACNA1S;SLC8A1
Unsaturated Fatty Acid Metabolic Process (GO:0033559)	3/35	0.0145709	0.191978	0	0	6.33822	26.8026	ELOVL5;ALOX5;MGLL
Positive Regulation Of Axonogenesis (GO:0050772)	3/35	0.0145709	0.191978	0	0	6.33822	26.8026	SLIT2;MAPT;PLXNA4
Phospholipid Metabolic Process (GO:0006644)	4/64	0.0146071	0.191978	0	0	4.51737	19.0916	ANGPTL3;PNPLA3;PLBD1;PLPP3
Amyloid-Beta Metabolic Process (GO:0050435)	2/13	0.0151188	0.195599	0	0	12.2598	51.391	MME;MGAT3
Calcium Ion-Regulated Exocytosis Of Neurotransmitter (GO:0048791)	2/13	0.0151188	0.195599	0	0	12.2598	51.391	RIMS4;SYT2
Response To Calcium Ion (GO:0051592)	5/99	0.0154989	0.198797	0	0	3.61125	15.048	RYR2;SYT2;CASQ2;ADCY1;ADCY8
Regulation Of Endothelial Cell Apoptotic Process (GO:2000351)	3/36	0.0157261	0.198797	0	0	6.1458	25.52	ANGPT1;NDNF;ANO6
Ventricular Septum Development (GO:0003281)	3/36	0.0157261	0.198797	0	0	6.1458	25.52	SLIT2;PROX1;SOX4
Regulation Of MAP Kinase Activity (GO:0043405)	5/100	0.0161247	0.201685	0	0	3.57303	14.7473	PDGFC;FGF18;BMP7;SORL1;FGFR1
Negative Regulation Of Cellular Response To Growth Factor Stimulus (GO:0090288)	4/66	0.0161982	0.201685	0	0	4.37115	18.0216	BMPER;SLIT2;SORL1;SULF2
Positive Regulation Of Insulin Secretion (GO:0032024)	3/37	0.0169314	0.205169	0	0	5.96471	24.3276	MYRIP;ADCY8;SOX4
Positive Regulation Of Neuron Differentiation (GO:0045666)	3/37	0.0169314	0.205169	0	0	5.96471	24.3276	PROX1;GDPD5;FGFR1
Response To Fatty Acid (GO:0070542)	2/14	0.0174691	0.205169	0	0	11.2375	45.482	IRS1;PDK4
Response To Muscle Stretch (GO:0035994)	2/14	0.0174691	0.205169	0	0	11.2375	45.482	RYR2;SLC8A1
Ventricular Cardiac Muscle Cell Action Potential (GO:0086005)	2/14	0.0174691	0.205169	0	0	11.2375	45.482	RYR2;KCNE1
Mesenchyme Development (GO:0060485)	2/14	0.0174691	0.205169	0	0	11.2375	45.482	BMP7;SOX4
Mesonephric Tubule Development (GO:0072164)	2/14	0.0174691	0.205169	0	0	11.2375	45.482	SLIT2;BMP7
Nitric Oxide Mediated Signal Transduction (GO:0007263)	2/14	0.0174691	0.205169	0	0	11.2375	45.482	DDAH1;NDNF
Plasma Membrane Organization (GO:0007009)	4/68	0.017894	0.207708	0	0	4.23407	17.0349	PLSCR5;EPB41L3;PACSIN2;ANO6
Acylglycerol Metabolic Process (GO:0006639)	3/38	0.018187	0.207708	0	0	5.79396	23.2167	ABHD2;PNPLA3;MGLL
Heart Contraction (GO:0060047)	3/38	0.018187	0.207708	0	0	5.79396	23.2167	RYR2;CASQ2;SLC8A1
Neuron Projection Extension (GO:1990138)	3/38	0.018187	0.207708	0	0	5.79396	23.2167	SEMA3A;TMEM108;SH3GL2
Regulation Of Angiogenesis (GO:0045765)	7/184	0.0193586	0.213285	0	0	2.69313	10.6234	BMPER;ALOX5;FGF18;ANGPTL3;PRKD1;ANGPTL4;TSPAN12
Regulation Of Neurotransmitter Receptor Activity (GO:0099601)	3/39	0.0194931	0.213285	0	0	5.63269	22.1798	LYNX1;GSG1L;SHISA6
Regulation Of Axonogenesis (GO:0050770)	3/39	0.0194931	0.213285	0	0	5.63269	22.1798	EPHA4;SLIT2;PLXNA4
Cardiac Myofibril Assembly (GO:0055003)	2/15	0.0199632	0.213285	0	0	10.3725	40.5967	NEB;PROX1
Triglyceride Biosynthetic Process (GO:0019432)	2/15	0.0199632	0.213285	0	0	10.3725	40.5967	PNPLA3;LPIN1
Ureteric Bud Development (GO:0001657)	2/15	0.0199632	0.213285	0	0	10.3725	40.5967	SLIT2;BMP7
Linoleic Acid Metabolic Process (GO:0043651)	2/15	0.0199632	0.213285	0	0	10.3725	40.5967	ELOVL5;ALOX5
Negative Regulation Of Synaptic Transmission (GO:0050805)	2/15	0.0199632	0.213285	0	0	10.3725	40.5967	SLC24A2;STXBP1
Positive Regulation Of Dendrite Extension (GO:1903861)	2/15	0.0199632	0.213285	0	0	10.3725	40.5967	RNF157;SYT2
Regulation Of DNA Methylation-Dependent Heterochromatin Formation (GO:0090308)	2/15	0.0199632	0.213285	0	0	10.3725	40.5967	L3MBTL3;TET1
Fatty Acid Metabolic Process (GO:0006631)	5/106	0.0202342	0.214794	0	0	3.35962	13.1038	ALOX5;ANGPTL3;PNPLA3;ACSL3;LPIN1
Positive Regulation Of Catabolic Process (GO:0009896)	4/71	0.020638	0.216308	0	0	4.0438	15.6924	L3MBTL3;ANGPTL3;ASB5;SORL1
Positive Regulation Of Synaptic Transmission (GO:0050806)	4/71	0.020638	0.216308	0	0	4.0438	15.6924	SLC24A2;LGI1;RIMS4;ADCY8
Positive Regulation Of Osteoblast Differentiation (GO:0045669)	3/40	0.0208496	0.217151	0	0	5.48015	21.2105	FBN2;PRKD1;BMP7
Calcium Ion Transport (GO:0006816)	5/108	0.0217429	0.222804	0	0	3.29401	12.611	SLC24A2;RYR2;ANO6;CACNA1S;SLC8A1
Positive Regulation Of Angiogenesis (GO:0045766)	5/108	0.0217429	0.222804	0	0	3.29401	12.611	BMPER;FGF18;ANGPTL3;PRKD1;ANGPTL4
Regulation Of Dendrite Extension (GO:1903859)	2/16	0.0225965	0.222804	0	0	9.63109	36.5015	RNF157;SYT2
Aorta Morphogenesis (GO:0035909)	2/16	0.0225965	0.222804	0	0	9.63109	36.5015	PROX1;ADAMTS9
Cell Communication By Electrical Coupling Involved In Cardiac Conduction (GO:0086064)	2/16	0.0225965	0.222804	0	0	9.63109	36.5015	RYR2;SLC8A1
Eye Morphogenesis (GO:0048592)	2/16	0.0225965	0.222804	0	0	9.63109	36.5015	FBN2;SHROOM2
Positive Regulation Of Heart Rate (GO:0010460)	2/16	0.0225965	0.222804	0	0	9.63109	36.5015	RYR2;ADRA1B
Positive Regulation Of Potassium Ion Transmembrane Transport (GO:1901381)	2/16	0.0225965	0.222804	0	0	9.63109	36.5015	KCNE1;ANO6
Regulation Of Neuron Differentiation (GO:0045664)	4/73	0.0226033	0.222804	0	0	3.92614	14.8787	NREP;GDPD5;BMP7;FGFR1
Regulation Of Peptide Hormone Secretion (GO:0090276)	3/42	0.0237145	0.232374	0	0	5.19852	19.4511	GIPR;ALOX5;CLOCK
Regulation Of Gene Expression (GO:0010468)	21/897	0.0244781	0.238446	0	0	1.65768	6.14994	SRRM4;ANGPT1;ESRRG;PROX1;BMP7;SLC8A1;ZFP36L1;ADAM19;NFIL3;GDNF;FGF18;REL;GTF2IRD1;ALPK2;MAPT;IGF2BP2;CLOCK;RREB1;SOX4;SH3GL2;MARK1
Regulation Of Smooth Muscle Cell Migration (GO:0014910)	2/17	0.0253642	0.238654	0	0	8.98851	33.0275	SLIT2;SORL1
Embryo Development Ending In Birth Or Egg Hatching (GO:0009792)	2/17	0.0253642	0.238654	0	0	8.98851	33.0275	STOX2;FGFR1
Long-Chain fatty-acyl-CoA Biosynthetic Process (GO:0035338)	2/17	0.0253642	0.238654	0	0	8.98851	33.0275	ELOVL5;ACSL3
Peptide Cross-Linking (GO:0018149)	2/17	0.0253642	0.238654	0	0	8.98851	33.0275	NDNF;FGFR1
Polyol Metabolic Process (GO:0019751)	2/17	0.0253642	0.238654	0	0	8.98851	33.0275	INPP4B;INPP5A
Positive Regulation Of CREB Transcription Factor Activity (GO:0032793)	2/17	0.0253642	0.238654	0	0	8.98851	33.0275	PRKD1;ADCY8
Positive Regulation Of Cell Projection Organization (GO:0031346)	5/113	0.0258291	0.241656	0	0	3.14061	11.4829	ROR1;NDNF;PRKD1;SLIT2;PLXNA4
Calcium Ion Transmembrane Import Into Cytosol (GO:0097553)	4/77	0.0268658	0.249943	0	0	3.71016	13.4193	SLC24A2;RYR2;CACNA1S;SLC8A1
Negative Regulation Of Multicellular Organismal Process (GO:0051241)	7/198	0.0275146	0.254548	0	0	2.49372	8.96004	EPHA4;SFMBT1;NPR3;TET1;ALPK2;RAB11FIP5;MARK1
Sodium Ion Transmembrane Transport (GO:0035725)	4/78	0.0280015	0.257153	0	0	3.65981	13.0857	SLC24A2;SLC6A17;SLC9A7;SLC8A1
Response To Axon Injury (GO:0048678)	2/18	0.0282619	0.257153	0	0	8.42625	30.05	RTN4RL1;NREP
Glycerolipid Catabolic Process (GO:0046503)	2/18	0.0282619	0.257153	0	0	8.42625	30.05	ABHD2;MGLL
Regulation Of Protein Phosphorylation (GO:0001932)	8/246	0.0295734	0.266411	0	0	2.28993	8.06258	BMPER;ANGPT1;FGF18;SLIT2;PLPP3;BMP7;SH3GL2;ZBED3
Generation Of Neurons (GO:0048699)	6/158	0.0296012	0.266411	0	0	2.68145	9.43853	SEMA3A;DDIT4;NDNF;MAPT;MARK1;FGFR1
Positive Regulation Of Developmental Growth (GO:0048639)	3/46	0.0300504	0.267548	0	0	4.71386	16.5215	RNF157;SYT2;MAPT
Regulation Of Epithelial Cell Proliferation (GO:0050678)	4/80	0.0303576	0.267548	0	0	3.5631	12.452	ANGPT1;FGF18;PRKD1;ZFP36L1
Protein Autophosphorylation (GO:0046777)	6/160	0.0312091	0.267548	0	0	2.64632	9.17491	EPHA4;GRK5;STK24;PRKD1;EPHB1;FGFR1
Regulation Of Cellular Response To Growth Factor Stimulus (GO:0090287)	2/19	0.0312853	0.267548	0	0	7.93013	27.4748	SLIT2;FSTL4
Cell Projection Organization (GO:0030030)	2/19	0.0312853	0.267548	0	0	7.93013	27.4748	PACSIN2;PARVB
Response To Fibroblast Growth Factor (GO:0071774)	2/19	0.0312853	0.267548	0	0	7.93013	27.4748	NDNF;ZFP36L1
Response To Ketone (GO:1901654)	2/19	0.0312853	0.267548	0	0	7.93013	27.4748	ABHD2;SLIT2
Sodium Ion Import Across Plasma Membrane (GO:0098719)	2/19	0.0312853	0.267548	0	0	7.93013	27.4748	SLC9A7;SLC8A1
Negative Regulation Of Myeloid Cell Differentiation (GO:0045638)	2/19	0.0312853	0.267548	0	0	7.93013	27.4748	MEIS1;ZFP36L1
Negative Regulation Of Response To External Stimulus (GO:0032102)	5/119	0.0313431	0.267548	0	0	2.9743	10.2993	RTN4R;EPHA4;DUSP3;RTN4RL1;ALOX5
Renal System Development (GO:0072001)	3/47	0.0317601	0.26834	0	0	4.60647	15.8902	MME;PROX1;SULF2
Response To Peptide Hormone (GO:0043434)	3/47	0.0317601	0.26834	0	0	4.60647	15.8902	IRS1;ZFP36L1;ZBED3
Central Nervous System Development (GO:0007417)	8/252	0.0334098	0.280846	0	0	2.23285	7.58925	MEIS1;SLC6A17;DDIT4;PDGFC;SHROOM2;PROX1;SOX4;SH3GL2
Acylglycerol Biosynthetic Process (GO:0046463)	2/20	0.0344299	0.286512	0	0	7.48914	25.2296	PNPLA3;LPIN1
Positive Regulation Of Lipid Catabolic Process (GO:0050996)	2/20	0.0344299	0.286512	0	0	7.48914	25.2296	IRS1;ANGPTL3
Cellular Response To Oxygen-Containing Compound (GO:1901701)	10/350	0.0349368	0.289277	0	0	2.00767	6.73416	KCNE1;SYT2;IRS1;PDK4;PRKD1;MAPT;ADCY1;SLIT2;ADCY8;ZFP36L1
Sprouting Angiogenesis (GO:0002040)	3/49	0.035329	0.291069	0	0	4.40569	14.7284	BMPER;ANGPT1;SLIT2
Protein O-linked Glycosylation (GO:0006493)	4/85	0.0367464	0.300084	0	0	3.3422	11.0417	ST6GAL1;GALNT18;ST3GAL4;TET1
Synapse Organization (GO:0050808)	5/125	0.0375434	0.300084	0	0	2.82461	9.2711	KIRREL3;MAPT;GPC4;PDZRN3;KY
Negative Regulation Of Cellular Biosynthetic Process (GO:0031327)	5/125	0.0375434	0.300084	0	0	2.82461	9.2711	EPHA4;DACH1;TRIM2;PROX1;IGF2BP2
Regulation Of Dopamine Secretion (GO:0014059)	2/21	0.0376917	0.300084	0	0	7.09458	23.2583	SYT2;GDNF
Regulation Of Keratinocyte Proliferation (GO:0010837)	2/21	0.0376917	0.300084	0	0	7.09458	23.2583	PRKD1;ZFP36L1
Regulation Of Monocyte Chemotaxis (GO:0090025)	2/21	0.0376917	0.300084	0	0	7.09458	23.2583	ANO6;SLIT2
Regulation Of Cardiac Conduction (GO:1903779)	2/21	0.0376917	0.300084	0	0	7.09458	23.2583	RYR2;SLC8A1
Regulated Exocytosis (GO:0045055)	3/51	0.0390958	0.309773	0	0	4.22163	13.6854	RAB31;STXBP1;RAB11FIP5
Inorganic Cation Transmembrane Transport (GO:0098662)	8/262	0.0405331	0.31197	0	0	2.14371	6.87195	SLC24A2;KCNE1;SLC6A17;SLC9A7;ANO6;CACNA1S;SLC8A1;KCNK3
Negative Regulation Of Amide Metabolic Process (GO:0034249)	4/88	0.0409235	0.31197	0	0	3.22228	10.2986	EPHA4;TRIM2;IGF2BP2;SORL1
Phosphatidylinositol Biosynthetic Process (GO:0006661)	4/88	0.0409235	0.31197	0	0	3.22228	10.2986	CDS1;INPP4B;PITPNM3;TTC7B
Eye Development (GO:0001654)	3/52	0.0410527	0.31197	0	0	4.13524	13.2034	FBN2;MEIS1;SHROOM2
Acylglycerol Homeostasis (GO:0055090)	2/22	0.0410665	0.31197	0	0	6.73946	21.5162	ANGPTL3;ANGPTL4
Response To BMP (GO:0071772)	2/22	0.0410665	0.31197	0	0	6.73946	21.5162	HJV;BMP7
Inositol Phosphate Metabolic Process (GO:0043647)	2/22	0.0410665	0.31197	0	0	6.73946	21.5162	INPP4B;INPP5A
Positive Regulation Of Monooxygenase Activity (GO:0032770)	2/22	0.0410665	0.31197	0	0	6.73946	21.5162	GDNF;NPR3
Positive Regulation Of Developmental Process (GO:0051094)	7/216	0.0410685	0.31197	0	0	2.2766	7.26807	GDNF;TET1;RREB1;BMP7;SORL1;ZBED3;FGFR1
Monoatomic Cation Transmembrane Transport (GO:0098655)	8/263	0.0412969	0.312272	0	0	2.13518	6.80475	SLC24A2;KCNE1;SLC6A17;SLC9A7;ANO6;CACNA1S;SLC8A1;KCNK3
Positive Regulation Of MAPK Cascade (GO:0043410)	8/264	0.0420703	0.316082	0	0	2.12672	6.73832	BMPER;ANGPT1;PDGFC;FGF18;ACKR3;ROR1;ADRA1B;FGFR1
Negative Regulation Of MAPK Cascade (GO:0043409)	4/89	0.0423733	0.316082	0	0	3.18419	10.066	EPHA4;DUSP3;BMP7;SORL1
Positive Regulation Of Neuron Projection Development (GO:0010976)	4/89	0.0423733	0.316082	0	0	3.18419	10.066	ROR1;NDNF;PRKD1;BMP7
Fatty Acid Biosynthetic Process (GO:0006633)	3/53	0.0430582	0.318896	0	0	4.05231	12.7453	ELOVL5;ABHD2;ALOX5
Regulation Of Muscle Organ Development (GO:0048634)	1/3	0.0435006	0.318896	0	0	33.6031	105.345	SFMBT1
Hepatocyte Differentiation (GO:0070365)	1/3	0.0435006	0.318896	0	0	33.6031	105.345	PROX1
Regulation Of Protein Secretion (GO:0050708)	4/90	0.0438519	0.318896	0	0	3.14699	9.84043	GIPR;ALOX5;ADCY8;CLOCK
Muscle Contraction (GO:0006936)	4/90	0.0438519	0.318896	0	0	3.14699	9.84043	RYR2;CASQ2;CACNA1S;SLC8A1
Axon Extension (GO:0048675)	2/23	0.0445503	0.318896	0	0	6.41817	19.9678	SEMA3A;SLIT2
Long-Chain fatty-acyl-CoA Metabolic Process (GO:0035336)	2/23	0.0445503	0.318896	0	0	6.41817	19.9678	ELOVL5;ACSL3
Metanephros Development (GO:0001656)	2/23	0.0445503	0.318896	0	0	6.41817	19.9678	GDNF;BMP7
Regulation Of AMPA Receptor Activity (GO:2000311)	2/23	0.0445503	0.318896	0	0	6.41817	19.9678	GSG1L;SHISA6
Striated Muscle Contraction (GO:0006941)	3/54	0.0451119	0.318896	0	0	3.97262	12.3096	RYR2;CASQ2;SLC8A1
Negative Regulation Of Macromolecule Biosynthetic Process (GO:0010558)	4/91	0.0453591	0.318896	0	0	3.11064	9.62165	EPHA4;DACH1;TRIM2;IGF2BP2
Positive Regulation Of Cell Population Proliferation (GO:0008284)	11/419	0.046485	0.318896	0	0	1.84039	5.64748	EPHA4;MEIS1;TSC22D1;GRK5;GDNF;IRS1;PDGFC;FGF18;PROX1;SOX4;FGFR1
Adenylate Cyclase-Activating G Protein-Coupled Receptor Signaling Pathway (GO:0007189)	4/92	0.0468951	0.318896	0	0	3.07511	9.40936	GIPR;ADCY1;ADRA1B;ADCY8
Protein Glycosylation (GO:0006486)	5/133	0.0469045	0.318896	0	0	2.64686	8.09845	GALNT18;ST3GAL4;MAN1C1;MGAT3;TET1
Intracellular Monoatomic Cation Homeostasis (GO:0030003)	6/177	0.0471916	0.318896	0	0	2.38091	7.27021	SLC24A2;RYR2;HJV;CASQ2;CP;SLC8A1
Regulation Of Neuron Death (GO:1901214)	3/55	0.0472135	0.318896	0	0	3.89601	11.8948	TRIM2;MAPT;SORL1
Camera-Type Eye Development (GO:0043010)	2/24	0.0481392	0.318896	0	0	6.12609	18.5845	FBN2;SHROOM2
Response To Glucocorticoid (GO:0051384)	2/24	0.0481392	0.318896	0	0	6.12609	18.5845	SLIT2;ZFP36L1
fatty-acyl-CoA Biosynthetic Process (GO:0046949)	2/24	0.0481392	0.318896	0	0	6.12609	18.5845	ELOVL5;ACSL3
Neuromuscular Junction Development (GO:0007528)	2/24	0.0481392	0.318896	0	0	6.12609	18.5845	PDZRN3;KY
Positive Regulation Of Phosphatidylinositol 3-Kinase Activity (GO:0043552)	2/24	0.0481392	0.318896	0	0	6.12609	18.5845	IRS1;PRKD1
Regulation Of Actin Polymerization Or Depolymerization (GO:0008064)	2/24	0.0481392	0.318896	0	0	6.12609	18.5845	DAAM2;MEGF9
Axonogenesis (GO:0007409)	6/178	0.0482641	0.318896	0	0	2.36694	7.17434	LGI1;EPHA4;SEMA3A;FEZ2;SLIT2;EPHB1
Calcium Ion Homeostasis (GO:0055074)	4/93	0.0484597	0.318896	0	0	3.04039	9.20333	SLC24A2;RYR2;CASQ2;SLC8A1
Actin Filament Organization (GO:0007015)	5/135	0.0494426	0.318896	0	0	2.60584	7.83563	MYO1E;SHROOM2;NEB;PROX1;ZBED3
External Encapsulating Structure Organization (GO:0045229)	4/94	0.0500529	0.318896	0	0	3.00644	9.0033	COL13A1;NDNF;ADAMTS9;COLQ
Extracellular Structure Organization (GO:0043062)	4/94	0.0500529	0.318896	0	0	3.00644	9.0033	COL13A1;NDNF;ADAMTS9;COLQ
Positive Regulation Of Vasculature Development (GO:1904018)	4/94	0.0500529	0.318896	0	0	3.00644	9.0033	FGF18;ANGPTL3;PRKD1;ANGPTL4
Protein Polymerization (GO:0051258)	3/57	0.0515587	0.318896	0	0	3.75128	11.1227	CASQ2;MAPT;HDGFL3
Regulation Of Fatty Acid Biosynthetic Process (GO:0042304)	2/25	0.0518293	0.318896	0	0	5.8594	17.3427	ELOVL5;PDK4
Regulation Of Nitric-Oxide Synthase Activity (GO:0050999)	2/25	0.0518293	0.318896	0	0	5.8594	17.3427	DDAH1;NPR3
Calcium-Ion Regulated Exocytosis (GO:0017156)	2/25	0.0518293	0.318896	0	0	5.8594	17.3427	RIMS4;SYT2
Cardiac Muscle Cell Development (GO:0055013)	2/25	0.0518293	0.318896	0	0	5.8594	17.3427	ALPK2;SLC8A1
Proteoglycan Metabolic Process (GO:0006029)	2/25	0.0518293	0.318896	0	0	5.8594	17.3427	GAL3ST3;SULF2
Regulation Of Calcium-Mediated Signaling (GO:0050848)	2/25	0.0518293	0.318896	0	0	5.8594	17.3427	HTT;MAPT
Adenylate Cyclase-Modulating G Protein-Coupled Receptor Signaling Pathway (GO:0007188)	5/139	0.0547573	0.318896	0	0	2.52748	7.34193	GRK5;GIPR;ADCY1;ADRA1B;ADCY8
Inorganic Cation Import Across Plasma Membrane (GO:0098659)	4/97	0.0550035	0.318896	0	0	2.90896	8.43701	SLC24A2;SLC9A7;CACNA1S;SLC8A1
Negative Regulation Of Developmental Process (GO:0051093)	4/97	0.0550035	0.318896	0	0	2.90896	8.43701	SFMBT1;TET1;ALPK2;MAPT
Regulation Of Extrinsic Apoptotic Signaling Pathway In Absence Of Ligand (GO:2001239)	2/26	0.0556171	0.318896	0	0	5.61494	16.2231	GDNF;FGFR1
Regulation Of Potassium Ion Transmembrane Transporter Activity (GO:1901016)	2/26	0.0556171	0.318896	0	0	5.61494	16.2231	KCNE1;CASQ2
Cardiac Muscle Cell Differentiation (GO:0055007)	2/26	0.0556171	0.318896	0	0	5.61494	16.2231	ALPK2;SLC8A1
Cellular Response To Epidermal Growth Factor Stimulus (GO:0071364)	2/26	0.0556171	0.318896	0	0	5.61494	16.2231	DUSP3;ZFP36L1
Regulation Of Vasculature Development (GO:1901342)	2/26	0.0556171	0.318896	0	0	5.61494	16.2231	BMPER;TSPAN12
Positive Regulation Of Calcium Ion Transmembrane Transporter Activity (GO:1901021)	2/26	0.0556171	0.318896	0	0	5.61494	16.2231	RYR2;HTT
Protein N-linked Glycosylation (GO:0006487)	3/59	0.0560905	0.318896	0	0	3.6169	10.4195	ST6GAL1;MAN1C1;MGAT3
Activation Of Transmembrane Receptor Protein Tyrosine Kinase Activity (GO:0007171)	1/4	0.0575777	0.318896	0	0	22.4008	63.9457	ANGPT1
Regulation Of Morphogenesis Of A Branching Structure (GO:0060688)	1/4	0.0575777	0.318896	0	0	22.4008	63.9457	GDNF
Blood Vessel Endothelial Cell Proliferation Involved In Sprouting Angiogenesis (GO:0002043)	1/4	0.0575777	0.318896	0	0	22.4008	63.9457	BMPER
Regulation Of pre-miRNA Processing (GO:2000631)	1/4	0.0575777	0.318896	0	0	22.4008	63.9457	LIN28B
Regulation Of Retinal Ganglion Cell Axon Guidance (GO:0090259)	1/4	0.0575777	0.318896	0	0	22.4008	63.9457	SLIT2
Regulation Of Sarcomere Organization (GO:0060297)	1/4	0.0575777	0.318896	0	0	22.4008	63.9457	PROX1
Lymphoid Progenitor Cell Differentiation (GO:0002320)	1/4	0.0575777	0.318896	0	0	22.4008	63.9457	SOX4
Negative Regulation Of Amino Acid Transport (GO:0051956)	1/4	0.0575777	0.318896	0	0	22.4008	63.9457	SLC43A2
Negative Regulation Of Chemokine-Mediated Signaling Pathway (GO:0070100)	1/4	0.0575777	0.318896	0	0	22.4008	63.9457	SLIT2
Negative Regulation Of Glucocorticoid Receptor Signaling Pathway (GO:2000323)	1/4	0.0575777	0.318896	0	0	22.4008	63.9457	CLOCK
Negative Regulation Of Lipoprotein Lipase Activity (GO:0051005)	1/4	0.0575777	0.318896	0	0	22.4008	63.9457	ANGPTL4
Negative Regulation Of Protein Targeting To Membrane (GO:0090315)	1/4	0.0575777	0.318896	0	0	22.4008	63.9457	KCNE1
poly-N-acetyllactosamine Metabolic Process (GO:0030309)	1/4	0.0575777	0.318896	0	0	22.4008	63.9457	GAL3ST3
Positive Regulation Of Urine Volume (GO:0035810)	1/4	0.0575777	0.318896	0	0	22.4008	63.9457	NPR3
Regulation Of Glucose Metabolic Process (GO:0010906)	2/27	0.0594987	0.318896	0	0	5.39004	15.2096	IRS1;PDK4
Regulation Of Potassium Ion Transport (GO:0043266)	2/27	0.0594987	0.318896	0	0	5.39004	15.2096	KCNE1;CASQ2
Central Nervous System Neuron Differentiation (GO:0021953)	2/27	0.0594987	0.318896	0	0	5.39004	15.2096	PROX1;MAPT
Clathrin-Dependent Endocytosis (GO:0072583)	2/27	0.0594987	0.318896	0	0	5.39004	15.2096	STON2;SNAP91
Regulation Of Calcium Ion-Dependent Exocytosis (GO:0017158)	2/27	0.0594987	0.318896	0	0	5.39004	15.2096	SYT2;STXBP1
Phosphatidylinositol Metabolic Process (GO:0046488)	3/61	0.0608052	0.318896	0	0	3.49178	9.77725	CDS1;INPP4B;PITPNM3
Regulation Of Endocytosis (GO:0030100)	3/62	0.06323	0.318896	0	0	3.4324	9.47678	PACSIN2;STON2;PRKD1
Cardiac Muscle Cell Action Potential Involved In Contraction (GO:0086002)	2/28	0.0634706	0.318896	0	0	5.18243	14.2889	RYR2;KCNE1
Regulation Of Transmembrane Receptor Protein Serine/Threonine Kinase Signaling Pathway (GO:0090092)	2/28	0.0634706	0.318896	0	0	5.18243	14.2889	NREP;FSTL4
Triglyceride Homeostasis (GO:0070328)	2/28	0.0634706	0.318896	0	0	5.18243	14.2889	ANGPTL3;ANGPTL4
Lipid Droplet Organization (GO:0034389)	2/28	0.0634706	0.318896	0	0	5.18243	14.2889	CDS1;PNPLA3
Negative Regulation Of Axon Extension (GO:0030517)	2/28	0.0634706	0.318896	0	0	5.18243	14.2889	RTN4R;SEMA3A
Negative Regulation Of Epithelial To Mesenchymal Transition (GO:0010719)	2/28	0.0634706	0.318896	0	0	5.18243	14.2889	EPHA4;MARK1
Phospholipid Catabolic Process (GO:0009395)	2/28	0.0634706	0.318896	0	0	5.18243	14.2889	ANGPTL3;PLBD1
Phospholipid Translocation (GO:0045332)	2/28	0.0634706	0.318896	0	0	5.18243	14.2889	PLSCR5;ANO6
Presynaptic Endocytosis (GO:0140238)	2/28	0.0634706	0.318896	0	0	5.18243	14.2889	SYT2;STON2
Protein Acetylation (GO:0006473)	2/28	0.0634706	0.318896	0	0	5.18243	14.2889	MAPT;CLOCK
Positive Regulation Of Multicellular Organismal Process (GO:0051240)	9/339	0.0640354	0.318896	0	0	1.8554	5.09924	GDNF;PDGFC;TET1;ESRRG;CACNA1S;LPIN1;RREB1;SORL1;ZBED3
Regulation Of Cellular Response To Stress (GO:0080135)	4/103	0.065667	0.318896	0	0	2.73172	7.4389	ALOX5;MAPT;ADCY8;SOX4
Cytoskeleton Organization (GO:0007010)	4/103	0.065667	0.318896	0	0	2.73172	7.4389	EPB41L3;PACSIN2;MARK1;SH3D19
Positive Regulation Of Protein Serine/Threonine Kinase Activity (GO:0071902)	4/103	0.065667	0.318896	0	0	2.73172	7.4389	PDGFC;FGF18;PROX1;FGFR1
Cardiac Muscle Cell Action Potential (GO:0086001)	2/29	0.0675295	0.318896	0	0	4.99021	13.4496	KCNE1;SLC8A1
Response To Epidermal Growth Factor (GO:0070849)	2/29	0.0675295	0.318896	0	0	4.99021	13.4496	DUSP3;ZFP36L1
Epithelial Tube Morphogenesis (GO:0060562)	2/29	0.0675295	0.318896	0	0	4.99021	13.4496	RYR2;SLIT2
Positive Regulation Of Cell Communication (GO:0010647)	2/29	0.0675295	0.318896	0	0	4.99021	13.4496	LGI1;RIMS4
Regulation Of Actin Filament Polymerization (GO:0030833)	3/64	0.0682117	0.318896	0	0	3.31948	8.91328	DAAM2;SLIT2;MEGF9
Brain Development (GO:0007420)	5/149	0.0694351	0.318896	0	0	2.35061	6.26994	MEIS1;SLC6A17;DDIT4;SHROOM2;PROX1
Positive Regulation Of ERK1 And ERK2 Cascade (GO:0070374)	5/149	0.0694351	0.318896	0	0	2.35061	6.26994	BMPER;ANGPT1;PDGFC;ACKR3;ROR1
Monoatomic Ion Transport (GO:0006811)	4/105	0.0694443	0.318896	0	0	2.67732	7.14103	SLC24A2;SLC9A7;ANO6;SLC8A1
Positive Regulation Of Wnt Signaling Pathway (GO:0030177)	4/105	0.0694443	0.318896	0	0	2.67732	7.14103	DAAM2;SOX4;ZBED3;SULF2
Regulation Of Monoatomic Ion Transmembrane Transporter Activity (GO:0032412)	3/65	0.0707676	0.318896	0	0	3.26576	8.64888	GSG1L;FXYD6;SHISA6
Cellular Response To Calcium Ion (GO:0071277)	3/65	0.0707676	0.318896	0	0	3.26576	8.64888	SYT2;ADCY1;ADCY8
Positive Regulation Of Phosphatidylinositol 3-Kinase Signaling (GO:0014068)	3/65	0.0707676	0.318896	0	0	3.26576	8.64888	PDGFC;ROR1;FGFR1
Regulation Of Cortisol Biosynthetic Process (GO:2000064)	1/5	0.0714485	0.318896	0	0	16.7996	44.3305	H6PD
Regulation Of Focal Adhesion Disassembly (GO:0120182)	1/5	0.0714485	0.318896	0	0	16.7996	44.3305	DUSP3
Regulation Of Glucocorticoid Receptor Signaling Pathway (GO:2000322)	1/5	0.0714485	0.318896	0	0	16.7996	44.3305	CLOCK
Regulation Of Histone Deacetylase Activity (GO:1901725)	1/5	0.0714485	0.318896	0	0	16.7996	44.3305	PRKD1
Regulation Of Keratinocyte Apoptotic Process (GO:1902172)	1/5	0.0714485	0.318896	0	0	16.7996	44.3305	ZFP36L1
Regulation Of Lysosomal Protein Catabolic Process (GO:1905165)	1/5	0.0714485	0.318896	0	0	16.7996	44.3305	MGAT3
Regulation Of Mammary Gland Epithelial Cell Proliferation (GO:0033599)	1/5	0.0714485	0.318896	0	0	16.7996	44.3305	RREB1
Auditory Behavior (GO:0031223)	1/5	0.0714485	0.318896	0	0	16.7996	44.3305	HTT
Axo-Dendritic Transport (GO:0008088)	1/5	0.0714485	0.318896	0	0	16.7996	44.3305	MAPT
Bradykinin Catabolic Process (GO:0010815)	1/5	0.0714485	0.318896	0	0	16.7996	44.3305	MME
Regulation Of Urine Volume (GO:0035809)	1/5	0.0714485	0.318896	0	0	16.7996	44.3305	NPR3
Release Of Sequestered Calcium Ion Into Cytosol By Endoplasmic Reticulum (GO:1903514)	1/5	0.0714485	0.318896	0	0	16.7996	44.3305	RYR2
Release Of Sequestered Calcium Ion Into Cytosol By Sarcoplasmic Reticulum (GO:0014808)	1/5	0.0714485	0.318896	0	0	16.7996	44.3305	RYR2
Chondrocyte Development (GO:0002063)	1/5	0.0714485	0.318896	0	0	16.7996	44.3305	SULF2
Response To Heparin (GO:0071503)	1/5	0.0714485	0.318896	0	0	16.7996	44.3305	SLIT2
Dendrite Arborization (GO:0140059)	1/5	0.0714485	0.318896	0	0	16.7996	44.3305	SEMA3A
Ear Development (GO:0043583)	1/5	0.0714485	0.318896	0	0	16.7996	44.3305	SHROOM2
Skeletal Muscle Thin Filament Assembly (GO:0030240)	1/5	0.0714485	0.318896	0	0	16.7996	44.3305	PROX1
Enteric Nervous System Development (GO:0048484)	1/5	0.0714485	0.318896	0	0	16.7996	44.3305	GDNF
Striated Muscle Hypertrophy (GO:0014897)	1/5	0.0714485	0.318896	0	0	16.7996	44.3305	RYR2
Synaptic Vesicle Uncoating (GO:0016191)	1/5	0.0714485	0.318896	0	0	16.7996	44.3305	SH3GL2
Vascular Wound Healing (GO:0061042)	1/5	0.0714485	0.318896	0	0	16.7996	44.3305	NDNF
Venous Blood Vessel Morphogenesis (GO:0048845)	1/5	0.0714485	0.318896	0	0	16.7996	44.3305	PROX1
Ventricular Cardiac Muscle Cell Development (GO:0055015)	1/5	0.0714485	0.318896	0	0	16.7996	44.3305	PROX1
Vocal Learning (GO:0042297)	1/5	0.0714485	0.318896	0	0	16.7996	44.3305	HTT
Imitative Learning (GO:0098596)	1/5	0.0714485	0.318896	0	0	16.7996	44.3305	HTT
Inclusion Body Assembly (GO:0070841)	1/5	0.0714485	0.318896	0	0	16.7996	44.3305	MAPT
Kidney Morphogenesis (GO:0060993)	1/5	0.0714485	0.318896	0	0	16.7996	44.3305	SOX4
Learned Vocalization Behavior Or Vocal Learning (GO:0098598)	1/5	0.0714485	0.318896	0	0	16.7996	44.3305	HTT
Lipoxygenase Pathway (GO:0019372)	1/5	0.0714485	0.318896	0	0	16.7996	44.3305	ALOX5
Medium-Chain Fatty Acid Biosynthetic Process (GO:0051792)	1/5	0.0714485	0.318896	0	0	16.7996	44.3305	ABHD2
Negative Regulation Of Cellular Response To Hypoxia (GO:1900038)	1/5	0.0714485	0.318896	0	0	16.7996	44.3305	EPHA4
Negative Regulation Of Erythrocyte Differentiation (GO:0045647)	1/5	0.0714485	0.318896	0	0	16.7996	44.3305	ZFP36L1
Negative Regulation Of Establishment Of Protein Localization To Mitochondrion (GO:1903748)	1/5	0.0714485	0.318896	0	0	16.7996	44.3305	MAPT
Negative Regulation Of Heterochromatin Formation (GO:0031452)	1/5	0.0714485	0.318896	0	0	16.7996	44.3305	TET1
Negative Regulation Of Lamellipodium Organization (GO:1902744)	1/5	0.0714485	0.318896	0	0	16.7996	44.3305	SLIT2
Negative Regulation Of miRNA Processing (GO:1903799)	1/5	0.0714485	0.318896	0	0	16.7996	44.3305	LIN28B
Negative Regulation Of Monocyte Chemotaxis (GO:0090027)	1/5	0.0714485	0.318896	0	0	16.7996	44.3305	SLIT2
Negative Regulation Of Phospholipase Activity (GO:0010519)	1/5	0.0714485	0.318896	0	0	16.7996	44.3305	ANGPTL3
Pericardium Morphogenesis (GO:0003344)	1/5	0.0714485	0.318896	0	0	16.7996	44.3305	BMP7
Plasma Membrane Raft Assembly (GO:0044854)	1/5	0.0714485	0.318896	0	0	16.7996	44.3305	PACSIN2
Plus-End-Directed Organelle Transport Along Microtubule (GO:0072386)	1/5	0.0714485	0.318896	0	0	16.7996	44.3305	MAPT
Podocyte Cell Migration (GO:0090521)	1/5	0.0714485	0.318896	0	0	16.7996	44.3305	DAAM2
Polyamine Transport (GO:0015846)	1/5	0.0714485	0.318896	0	0	16.7996	44.3305	SLC22A3
Positive Regulation Of Animal Organ Morphogenesis (GO:0110110)	1/5	0.0714485	0.318896	0	0	16.7996	44.3305	GDNF
Positive Regulation Of Focal Adhesion Disassembly (GO:0120183)	1/5	0.0714485	0.318896	0	0	16.7996	44.3305	DUSP3
Protein Repair (GO:0030091)	1/5	0.0714485	0.318896	0	0	16.7996	44.3305	MSRA
Cellular Response To cAMP (GO:0071320)	2/30	0.0716718	0.318896	0	0	4.81171	12.682	KCNE1;ZFP36L1
Mesenchymal Cell Migration (GO:0090497)	2/30	0.0716718	0.318896	0	0	4.81171	12.682	GDNF;SEMA3A
Negative Chemotaxis (GO:0050919)	2/30	0.0716718	0.318896	0	0	4.81171	12.682	SEMA3A;SLIT2
Negative Regulation Of Epithelial Cell Migration (GO:0010633)	2/30	0.0716718	0.318896	0	0	4.81171	12.682	SLIT2;ADAMTS9
Phosphatidylinositol 3-Kinase Signaling (GO:0014065)	2/30	0.0716718	0.318896	0	0	4.81171	12.682	IRS1;ZFP36L1
Regulation Of Amyloid-Beta Formation (GO:1902003)	2/30	0.0716718	0.318896	0	0	4.81171	12.682	EPHA4;SORL1
Glycerophospholipid Biosynthetic Process (GO:0046474)	4/107	0.0733312	0.318896	0	0	2.62503	6.85861	CDS1;INPP4B;PITPNM3;PNPLA3
Cellular Response To Oxidative Stress (GO:0034599)	4/108	0.0753153	0.318896	0	0	2.59964	6.72286	MSRA;MGAT3;PRKD1;MAPT
Regulation Of Cell Motility (GO:2000145)	4/108	0.0753153	0.318896	0	0	2.59964	6.72286	KIF2A;FGF18;MGAT3;PLXNA4
Inositol Lipid-Mediated Signaling (GO:0048017)	2/31	0.0758942	0.318896	0	0	4.64553	11.9781	INPP5A;FGFR1
Positive Regulation Of Neurogenesis (GO:0050769)	3/67	0.0760067	0.318896	0	0	3.16334	8.15172	MME;SLIT2;PLXNA4
Regulation Of Fat Cell Differentiation (GO:0045598)	3/68	0.0786889	0.318896	0	0	3.1145	7.91784	CDS1;ALOX5;ZFP36L1
Regulation Of Hydrolase Activity (GO:0051336)	3/68	0.0786889	0.318896	0	0	3.1145	7.91784	EPHA4;PRKG1;PLXNA4
Regulation Of Phosphatidylinositol 3-Kinase Activity (GO:0043551)	2/32	0.0801936	0.318896	0	0	4.49042	11.3307	IRS1;PRKD1
Cellular Response To Glucose Stimulus (GO:0071333)	2/32	0.0801936	0.318896	0	0	4.49042	11.3307	SOX4;RAB11FIP5
Muscle Cell Development (GO:0055001)	2/32	0.0801936	0.318896	0	0	4.49042	11.3307	ALPK2;SLC8A1
Negative Regulation Of Mitotic Cell Cycle (GO:0045930)	2/32	0.0801936	0.318896	0	0	4.49042	11.3307	BMP7;ZFP36L1
Neutral Amino Acid Transport (GO:0015804)	2/32	0.0801936	0.318896	0	0	4.49042	11.3307	SLC43A2;SLC6A17
Positive Regulation Of Protein Tyrosine Kinase Activity (GO:0061098)	2/32	0.0801936	0.318896	0	0	4.49042	11.3307	EPHA4;DOCK3
Regulation Of Cardiac Muscle Contraction (GO:0055117)	2/32	0.0801936	0.318896	0	0	4.49042	11.3307	RYR2;SLC8A1
Negative Regulation Of Cell Adhesion (GO:0007162)	3/69	0.0814119	0.318896	0	0	3.06713	7.69309	EPHA4;ANGPT1;PLXNA4
Positive Regulation Of Endothelial Cell Proliferation (GO:0001938)	3/69	0.0814119	0.318896	0	0	3.06713	7.69309	PROX1;PRKD1;FGFR1
Regulation Of BMP Signaling Pathway (GO:0030510)	3/70	0.0841753	0.318896	0	0	3.02118	7.47698	BMPER;SORL1;FSTL4
Regulation Of Regulated Secretory Pathway (GO:1903305)	2/33	0.0845667	0.318896	0	0	4.34532	10.7339	RIMS4;SYT2
Semaphorin-Plexin Signaling Pathway (GO:0071526)	2/33	0.0845667	0.318896	0	0	4.34532	10.7339	SEMA3A;PLXNA4
Ventricular Cardiac Muscle Tissue Morphogenesis (GO:0055010)	2/33	0.0845667	0.318896	0	0	4.34532	10.7339	RYR2;PROX1
Icosanoid Metabolic Process (GO:0006690)	2/33	0.0845667	0.318896	0	0	4.34532	10.7339	ALOX5;MGLL
Microtubule Polymerization (GO:0046785)	2/33	0.0845667	0.318896	0	0	4.34532	10.7339	MAPT;HDGFL3
Negative Regulation Of Protein Secretion (GO:0050709)	2/33	0.0845667	0.318896	0	0	4.34532	10.7339	IRS1;RAB11FIP5
Neural Crest Cell Migration (GO:0001755)	2/33	0.0845667	0.318896	0	0	4.34532	10.7339	GDNF;SEMA3A
Regulation Of Chemokine-Mediated Signaling Pathway (GO:0070099)	1/6	0.0851159	0.318896	0	0	13.4389	33.1101	SLIT2
Regulation Of Dopamine Uptake Involved In Synaptic Transmission (GO:0051584)	1/6	0.0851159	0.318896	0	0	13.4389	33.1101	GDNF
Regulation Of Glial Cell Differentiation (GO:0045685)	1/6	0.0851159	0.318896	0	0	13.4389	33.1101	EPHA4
Regulation Of Heterochromatin Formation (GO:0031445)	1/6	0.0851159	0.318896	0	0	13.4389	33.1101	L3MBTL3
Regulation Of Ketone Biosynthetic Process (GO:0010566)	1/6	0.0851159	0.318896	0	0	13.4389	33.1101	H6PD
Arginine Catabolic Process (GO:0006527)	1/6	0.0851159	0.318896	0	0	13.4389	33.1101	DDAH1
Catecholamine Uptake (GO:0090493)	1/6	0.0851159	0.318896	0	0	13.4389	33.1101	SLC22A3
Cellular Biogenic Amine Catabolic Process (GO:0042402)	1/6	0.0851159	0.318896	0	0	13.4389	33.1101	HNMT
Regulation Of Type B Pancreatic Cell Development (GO:2000074)	1/6	0.0851159	0.318896	0	0	13.4389	33.1101	CLOCK
Citrulline Metabolic Process (GO:0000052)	1/6	0.0851159	0.318896	0	0	13.4389	33.1101	DDAH1
Clathrin Coat Disassembly (GO:0072318)	1/6	0.0851159	0.318896	0	0	13.4389	33.1101	SH3GL2
Response To Alkaloid (GO:0043279)	1/6	0.0851159	0.318896	0	0	13.4389	33.1101	RYR2
Response To Hydroperoxide (GO:0033194)	1/6	0.0851159	0.318896	0	0	13.4389	33.1101	PRKD1
Detection Of Stimulus Involved In Sensory Perception Of Pain (GO:0062149)	1/6	0.0851159	0.318896	0	0	13.4389	33.1101	EPHB1
Retinal Rod Cell Differentiation (GO:0060221)	1/6	0.0851159	0.318896	0	0	13.4389	33.1101	RPGRIP1L
Excitatory Chemical Synaptic Transmission (GO:0098976)	1/6	0.0851159	0.318896	0	0	13.4389	33.1101	SHISA6
Synaptic Vesicle Budding From Presynaptic Endocytic Zone Membrane (GO:0016185)	1/6	0.0851159	0.318896	0	0	13.4389	33.1101	SNAP91
Fatty Acid Elongation, Monounsaturated Fatty Acid (GO:0034625)	1/6	0.0851159	0.318896	0	0	13.4389	33.1101	ELOVL5
Fatty Acid Elongation, Polyunsaturated Fatty Acid (GO:0034626)	1/6	0.0851159	0.318896	0	0	13.4389	33.1101	ELOVL5
Fatty Acid Elongation, Saturated Fatty Acid (GO:0019367)	1/6	0.0851159	0.318896	0	0	13.4389	33.1101	ELOVL5
Fatty Acid Elongation, Unsaturated Fatty Acid (GO:0019368)	1/6	0.0851159	0.318896	0	0	13.4389	33.1101	ELOVL5
Glomerular Epithelial Cell Development (GO:0072310)	1/6	0.0851159	0.318896	0	0	13.4389	33.1101	MYO1E
Vascular Associated Smooth Muscle Contraction (GO:0014829)	1/6	0.0851159	0.318896	0	0	13.4389	33.1101	SLC8A1
Ventricular Cardiac Muscle Cell Membrane Repolarization (GO:0099625)	1/6	0.0851159	0.318896	0	0	13.4389	33.1101	KCNE1
Histidine Catabolic Process (GO:0006548)	1/6	0.0851159	0.318896	0	0	13.4389	33.1101	HNMT
Histidine Metabolic Process (GO:0006547)	1/6	0.0851159	0.318896	0	0	13.4389	33.1101	HNMT
Insulin Secretion Involved In Cellular Response To Glucose Stimulus (GO:0035773)	1/6	0.0851159	0.318896	0	0	13.4389	33.1101	RAB11FIP5
Long-Term Synaptic Depression (GO:0060292)	1/6	0.0851159	0.318896	0	0	13.4389	33.1101	SLC24A2
Lymphatic Endothelial Cell Differentiation (GO:0060836)	1/6	0.0851159	0.318896	0	0	13.4389	33.1101	PROX1
Maintenance Of Protein Location In Extracellular Region (GO:0071694)	1/6	0.0851159	0.318896	0	0	13.4389	33.1101	FBN2
Mitotic Nuclear Membrane Disassembly (GO:0007077)	1/6	0.0851159	0.318896	0	0	13.4389	33.1101	LPIN1
Monoacylglycerol Catabolic Process (GO:0052651)	1/6	0.0851159	0.318896	0	0	13.4389	33.1101	MGLL
Negative Regulation Of Steroid Biosynthetic Process (GO:0010894)	1/6	0.0851159	0.318896	0	0	13.4389	33.1101	PROX1
Negative Regulation Of Striated Muscle Cell Apoptotic Process (GO:0010664)	1/6	0.0851159	0.318896	0	0	13.4389	33.1101	BMP7
Neuroepithelial Cell Differentiation (GO:0060563)	1/6	0.0851159	0.318896	0	0	13.4389	33.1101	SOX4
Neurotrophin TRK Receptor Signaling Pathway (GO:0048011)	1/6	0.0851159	0.318896	0	0	13.4389	33.1101	DDIT4
Noradrenergic Neuron Differentiation (GO:0003357)	1/6	0.0851159	0.318896	0	0	13.4389	33.1101	SOX4
Norepinephrine Transport (GO:0015874)	1/6	0.0851159	0.318896	0	0	13.4389	33.1101	SLC22A3
Nose Development (GO:0043584)	1/6	0.0851159	0.318896	0	0	13.4389	33.1101	PROX1
Nuclear-Transcribed mRNA Catabolic Process, Deadenylation-Independent Decay (GO:0031086)	1/6	0.0851159	0.318896	0	0	13.4389	33.1101	ZFP36L1
Peptidyl-Arginine Modification (GO:0018195)	1/6	0.0851159	0.318896	0	0	13.4389	33.1101	NDUFAF5
Peptidyl-Tyrosine Dephosphorylation Involved In Inactivation Of Protein Kinase Activity (GO:1990264)	1/6	0.0851159	0.318896	0	0	13.4389	33.1101	DUSP3
Podocyte Development (GO:0072015)	1/6	0.0851159	0.318896	0	0	13.4389	33.1101	MYO1E
Positive Regulation Of Aspartic-Type Endopeptidase Activity Involved In Amyloid Precursor Protein Catabolic Process (GO:1902961)	1/6	0.0851159	0.318896	0	0	13.4389	33.1101	EPHA4
Positive Regulation Of Catecholamine Secretion (GO:0033605)	1/6	0.0851159	0.318896	0	0	13.4389	33.1101	GDNF
Positive Regulation Of Deacetylase Activity (GO:0090045)	1/6	0.0851159	0.318896	0	0	13.4389	33.1101	PRKD1
Positive Regulation Of Lamellipodium Morphogenesis (GO:2000394)	1/6	0.0851159	0.318896	0	0	13.4389	33.1101	RREB1
Positive Regulation Of Leukocyte Tethering Or Rolling (GO:1903238)	1/6	0.0851159	0.318896	0	0	13.4389	33.1101	ST3GAL4
Regulation Of SA Node Cell Action Potential (GO:0098907)	1/6	0.0851159	0.318896	0	0	13.4389	33.1101	RYR2
Regulation Of Adiponectin Secretion (GO:0070163)	1/6	0.0851159	0.318896	0	0	13.4389	33.1101	RAB11FIP5
Regulation Of Blood-Brain Barrier Permeability (GO:1905603)	1/6	0.0851159	0.318896	0	0	13.4389	33.1101	SH3GL2
Potassium Ion Transport (GO:0006813)	4/113	0.0856367	0.320123	0	0	2.47969	6.09418	SLC24A2;KCNE1;SLC9A7;KCNK3
Cellular Response To Hypoxia (GO:0071456)	3/71	0.0869784	0.323677	0	0	2.97658	7.2691	NDNF;BMP7;ZFP36L1
Sphingolipid Biosynthetic Process (GO:0030148)	3/71	0.0869784	0.323677	0	0	2.97658	7.2691	ELOVL5;PRKD1;PLPP3
Aortic Valve Morphogenesis (GO:0003180)	2/34	0.0890105	0.328477	0	0	4.20929	10.1823	CDH11;SLIT2
Embryonic Organ Morphogenesis (GO:0048562)	2/34	0.0890105	0.328477	0	0	4.20929	10.1823	FBN2;RYR2
Positive Regulation Of Wound Healing (GO:0090303)	2/34	0.0890105	0.328477	0	0	4.20929	10.1823	ST3GAL4;RREB1
Cellular Response To Decreased Oxygen Levels (GO:0036294)	3/72	0.0898207	0.328477	0	0	2.93328	7.06902	NDNF;BMP7;ZFP36L1
Cellular Response To Starvation (GO:0009267)	4/115	0.0899488	0.328477	0	0	2.43473	5.86408	SESN3;STK24;PDK4;PRKD1
Cell Chemotaxis (GO:0060326)	2/35	0.093522	0.328477	0	0	4.0815	9.67136	DOCK4;EPHB1
Negative Regulation Of Endothelial Cell Migration (GO:0010596)	2/35	0.093522	0.328477	0	0	4.0815	9.67136	SLIT2;ADAMTS9
Regulation Of Kinase Activity (GO:0043549)	3/74	0.09562	0.328477	0	0	2.85033	6.69078	ROR1;MAPT;FGFR1
Macromolecule Modification (GO:0043412)	3/74	0.09562	0.328477	0	0	2.85033	6.69078	MSRA;ST6GAL1;ST3GAL4
Negative Regulation Of Protein Serine/Threonine Kinase Activity (GO:0071901)	3/74	0.09562	0.328477	0	0	2.85033	6.69078	BMP7;SORL1;SLC8A1
RNA 3'-End Processing (GO:0031123)	2/36	0.0980983	0.328477	0	0	3.96124	9.19714	LIN28B;INTS2
Cellular Response To Ketone (GO:1901655)	2/36	0.0980983	0.328477	0	0	3.96124	9.19714	ADCY1;ADCY8
Vesicle Cytoskeletal Trafficking (GO:0099518)	2/36	0.0980983	0.328477	0	0	3.96124	9.19714	MYO1E;HTT
Lipid Modification (GO:0030258)	2/36	0.0980983	0.328477	0	0	3.96124	9.19714	ALOX5;PLPP3
Positive Regulation Of Signaling (GO:0023056)	2/36	0.0980983	0.328477	0	0	3.96124	9.19714	LGI1;RIMS4
Regulation Of Establishment Of Protein Localization To Mitochondrion (GO:1903747)	1/7	0.0985828	0.328477	0	0	11.1985	25.9453	MAPT
Cardiac Muscle Hypertrophy (GO:0003300)	1/7	0.0985828	0.328477	0	0	11.1985	25.9453	RYR2
Catecholamine Transport (GO:0051937)	1/7	0.0985828	0.328477	0	0	11.1985	25.9453	SLC22A3
Regulation Of Response To Wounding (GO:1903034)	1/7	0.0985828	0.328477	0	0	11.1985	25.9453	STK24
Cellular Response To Epinephrine Stimulus (GO:0071872)	1/7	0.0985828	0.328477	0	0	11.1985	25.9453	RYR2
Regulation Of Transforming Growth Factor Beta Activation (GO:1901388)	1/7	0.0985828	0.328477	0	0	11.1985	25.9453	ITGB6
Regulation Of Vesicle Fusion (GO:0031338)	1/7	0.0985828	0.328477	0	0	11.1985	25.9453	STXBP1
Regulation Of Wound Healing, Spreading Of Epidermal Cells (GO:1903689)	1/7	0.0985828	0.328477	0	0	11.1985	25.9453	RREB1
Response To Epinephrine (GO:0071871)	1/7	0.0985828	0.328477	0	0	11.1985	25.9453	RYR2
Dopamine Uptake (GO:0090494)	1/7	0.0985828	0.328477	0	0	11.1985	25.9453	SLC22A3
Serotonin Uptake (GO:0051610)	1/7	0.0985828	0.328477	0	0	11.1985	25.9453	SLC22A3
Skeletal Myofibril Assembly (GO:0014866)	1/7	0.0985828	0.328477	0	0	11.1985	25.9453	PROX1
Sulfur Amino Acid Transport (GO:0000101)	1/7	0.0985828	0.328477	0	0	11.1985	25.9453	SLC43A2
Venous Blood Vessel Development (GO:0060841)	1/7	0.0985828	0.328477	0	0	11.1985	25.9453	PROX1
Lens Fiber Cell Development (GO:0070307)	1/7	0.0985828	0.328477	0	0	11.1985	25.9453	PROX1
Methionine Metabolic Process (GO:0006555)	1/7	0.0985828	0.328477	0	0	11.1985	25.9453	MSRA
Mitral Valve Development (GO:0003174)	1/7	0.0985828	0.328477	0	0	11.1985	25.9453	SOX4
Natural Killer Cell Differentiation (GO:0001779)	1/7	0.0985828	0.328477	0	0	11.1985	25.9453	NFIL3
Negative Regulation Of Delayed Rectifier Potassium Channel Activity (GO:1902260)	1/7	0.0985828	0.328477	0	0	11.1985	25.9453	KCNE1
Negative Regulation Of Lipase Activity (GO:0060192)	1/7	0.0985828	0.328477	0	0	11.1985	25.9453	ANGPTL4
Negative Regulation Of Mitochondrial Membrane Potential (GO:0010917)	1/7	0.0985828	0.328477	0	0	11.1985	25.9453	MAPT
Negative Regulation Of Mitotic Nuclear Division (GO:0045839)	1/7	0.0985828	0.328477	0	0	11.1985	25.9453	BMP7
Neurotransmitter Reuptake (GO:0098810)	1/7	0.0985828	0.328477	0	0	11.1985	25.9453	SLC22A3
p38MAPK Cascade (GO:0038066)	1/7	0.0985828	0.328477	0	0	11.1985	25.9453	ZFP36L1
Pericardium Development (GO:0060039)	1/7	0.0985828	0.328477	0	0	11.1985	25.9453	BMP7
Phosphatidylserine Acyl-Chain Remodeling (GO:0036150)	1/7	0.0985828	0.328477	0	0	11.1985	25.9453	OSBPL10
Plasma Membrane Phospholipid Scrambling (GO:0017121)	1/7	0.0985828	0.328477	0	0	11.1985	25.9453	PLSCR5
Positive Regulation Of Adipose Tissue Development (GO:1904179)	1/7	0.0985828	0.328477	0	0	11.1985	25.9453	SORL1
Positive Regulation Of Aspartic-Type Peptidase Activity (GO:1905247)	1/7	0.0985828	0.328477	0	0	11.1985	25.9453	EPHA4
Positive Regulation Of Cell Migration By Vascular Endothelial Growth Factor Signaling Pathway (GO:0038089)	1/7	0.0985828	0.328477	0	0	11.1985	25.9453	PRKD1
Positive Regulation Of Endocytic Recycling (GO:2001137)	1/7	0.0985828	0.328477	0	0	11.1985	25.9453	SORL1
Positive Regulation Of Epithelial Tube Formation (GO:1905278)	1/7	0.0985828	0.328477	0	0	11.1985	25.9453	GDNF
Positive Regulation Of Vascular Associated Smooth Muscle Cell Migration (GO:1904754)	1/7	0.0985828	0.328477	0	0	11.1985	25.9453	DOCK4
Postsynaptic Density Organization (GO:0097106)	1/7	0.0985828	0.328477	0	0	11.1985	25.9453	TMEM108
Proline Transport (GO:0015824)	1/7	0.0985828	0.328477	0	0	11.1985	25.9453	SLC6A17
Regulation Of ATPase-coupled Calcium Transmembrane Transporter Activity (GO:1901894)	1/7	0.0985828	0.328477	0	0	11.1985	25.9453	RYR2
Regulation Of Bile Acid Biosynthetic Process (GO:0070857)	1/7	0.0985828	0.328477	0	0	11.1985	25.9453	PROX1
Organonitrogen Compound Biosynthetic Process (GO:1901566)	4/119	0.0988785	0.328801	0	0	2.3495	5.43643	ELOVL5;ST3GAL4;PRKD1;PLPP3
Response To cAMP (GO:0051591)	2/37	0.102736	0.335609	0	0	3.84784	8.7561	KCNE1;ZFP36L1
Positive Regulation Of Cell-Cell Adhesion (GO:0022409)	2/37	0.102736	0.335609	0	0	3.84784	8.7561	PLPP3;BMP7
Positive Regulation Of DNA-binding Transcription Factor Activity (GO:0051091)	6/220	0.106898	0.335609	0	0	1.89781	4.24328	ROR1;PRKD1;ADCY1;PLPP3;ADCY8;CLOCK
Regulation Of Dendrite Development (GO:0050773)	2/38	0.107434	0.335609	0	0	3.74074	8.34515	BMP7;MARK1
O-glycan Processing (GO:0016266)	2/38	0.107434	0.335609	0	0	3.74074	8.34515	ST6GAL1;ST3GAL4
Axonal Transport (GO:0098930)	2/38	0.107434	0.335609	0	0	3.74074	8.34515	TMEM108;MAPT
Skeletal System Morphogenesis (GO:0048705)	2/38	0.107434	0.335609	0	0	3.74074	8.34515	FBN2;FGFR1
Fibroblast Growth Factor Receptor Signaling Pathway (GO:0008543)	2/38	0.107434	0.335609	0	0	3.74074	8.34515	FGF18;FGFR1
Organelle Transport Along Microtubule (GO:0072384)	2/38	0.107434	0.335609	0	0	3.74074	8.34515	HTT;MAPT
Calcium Ion Transmembrane Transport (GO:0070588)	3/79	0.110759	0.335609	0	0	2.66204	5.85755	SLC24A2;CACNA1S;SLC8A1
Negative Regulation Of Protein Kinase Activity (GO:0006469)	3/79	0.110759	0.335609	0	0	2.66204	5.85755	DUSP3;SORL1;SLC8A1
Regulation Of Epithelial Cell Apoptotic Process (GO:1904035)	1/8	0.111852	0.335609	0	0	9.59815	21.0255	ZFP36L1
Regulation Of Long-Term Synaptic Depression (GO:1900452)	1/8	0.111852	0.335609	0	0	9.59815	21.0255	MAPT
Alpha-Linolenic Acid Metabolic Process (GO:0036109)	1/8	0.111852	0.335609	0	0	9.59815	21.0255	ELOVL5
Amino Sugar Metabolic Process (GO:0006040)	1/8	0.111852	0.335609	0	0	9.59815	21.0255	ST6GAL1
Aminoglycan Metabolic Process (GO:0006022)	1/8	0.111852	0.335609	0	0	9.59815	21.0255	GAL3ST3
Cellular Response To UV-A (GO:0071492)	1/8	0.111852	0.335609	0	0	9.59815	21.0255	MME
Regulation Of Tau-Protein Kinase Activity (GO:1902947)	1/8	0.111852	0.335609	0	0	9.59815	21.0255	SORL1
Commissural Neuron Axon Guidance (GO:0071679)	1/8	0.111852	0.335609	0	0	9.59815	21.0255	GDNF
Semaphorin-Plexin Signaling Pathway Involved In Axon Guidance (GO:1902287)	1/8	0.111852	0.335609	0	0	9.59815	21.0255	PLXNA4
Embryonic Eye Morphogenesis (GO:0048048)	1/8	0.111852	0.335609	0	0	9.59815	21.0255	FBN2
Serotonin Transport (GO:0006837)	1/8	0.111852	0.335609	0	0	9.59815	21.0255	SLC22A3
Endochondral Ossification (GO:0001958)	1/8	0.111852	0.335609	0	0	9.59815	21.0255	COL13A1
Steroid Hormone Mediated Signaling Pathway (GO:0043401)	1/8	0.111852	0.335609	0	0	9.59815	21.0255	BMP7
Sympathetic Ganglion Development (GO:0061549)	1/8	0.111852	0.335609	0	0	9.59815	21.0255	SEMA3A
tRNA Transcription (GO:0009304)	1/8	0.111852	0.335609	0	0	9.59815	21.0255	ZFP36L1
Internal Protein Amino Acid Acetylation (GO:0006475)	1/8	0.111852	0.335609	0	0	9.59815	21.0255	MAPT
Mitral Valve Morphogenesis (GO:0003183)	1/8	0.111852	0.335609	0	0	9.59815	21.0255	SOX4
Morphogenesis Of An Epithelial Sheet (GO:0002011)	1/8	0.111852	0.335609	0	0	9.59815	21.0255	BMP7
Myelin Maintenance (GO:0043217)	1/8	0.111852	0.335609	0	0	9.59815	21.0255	EPB41L3
Negative Regulation Of Hormone Secretion (GO:0046888)	1/8	0.111852	0.335609	0	0	9.59815	21.0255	RAB11FIP5
Negative Regulation Of Leukocyte Migration (GO:0002686)	1/8	0.111852	0.335609	0	0	9.59815	21.0255	SLIT2
Negative Regulation Of Long-Term Synaptic Potentiation (GO:1900272)	1/8	0.111852	0.335609	0	0	9.59815	21.0255	EPHA4
Negative Regulation Of Membrane Potential (GO:0045837)	1/8	0.111852	0.335609	0	0	9.59815	21.0255	MAPT
Negative Regulation Of Muscle Cell Apoptotic Process (GO:0010656)	1/8	0.111852	0.335609	0	0	9.59815	21.0255	BMP7
Negative Regulation Of Platelet Aggregation (GO:0090331)	1/8	0.111852	0.335609	0	0	9.59815	21.0255	PRKG1
Negative Regulation Of Transcription By Competitive Promoter Binding (GO:0010944)	1/8	0.111852	0.335609	0	0	9.59815	21.0255	DACH1
Negative Regulation Of Triglyceride Metabolic Process (GO:0090209)	1/8	0.111852	0.335609	0	0	9.59815	21.0255	SORL1
Nuclear Membrane Disassembly (GO:0051081)	1/8	0.111852	0.335609	0	0	9.59815	21.0255	LPIN1
Positive Regulation Of Autophagy Of Mitochondrion (GO:1903599)	1/8	0.111852	0.335609	0	0	9.59815	21.0255	HTT
Positive Regulation Of Fatty Acid Beta-Oxidation (GO:0032000)	1/8	0.111852	0.335609	0	0	9.59815	21.0255	IRS1
Positive Regulation Of Membrane Invagination (GO:1905155)	1/8	0.111852	0.335609	0	0	9.59815	21.0255	RAB31
Positive Regulation Of Monocyte Differentiation (GO:0045657)	1/8	0.111852	0.335609	0	0	9.59815	21.0255	ZFP36L1
Protein Localization To Endosome (GO:0036010)	1/8	0.111852	0.335609	0	0	9.59815	21.0255	PACSIN2
Regulation Of Actin Filament Length (GO:0030832)	1/8	0.111852	0.335609	0	0	9.59815	21.0255	NEB
Branching Morphogenesis Of An Epithelial Tube (GO:0048754)	2/39	0.112187	0.335609	0	0	3.63943	7.96158	GDNF;SLIT2
Response To Amino Acid Starvation (GO:1990928)	2/39	0.112187	0.335609	0	0	3.63943	7.96158	SESN3;PRKD1
Homotypic Cell-Cell Adhesion (GO:0034109)	2/39	0.112187	0.335609	0	0	3.63943	7.96158	STXBP1;PLPP3
Endocytosis (GO:0006897)	5/173	0.112543	0.335609	0	0	2.01204	4.39515	MYO1E;PACSIN2;TMEM108;AMPH;SORL1
Potassium Ion Transmembrane Transport (GO:0071805)	4/125	0.11301	0.335609	0	0	2.23223	4.86689	SLC24A2;KCNE1;SLC9A7;KCNK3
Negative Regulation Of Neuron Death (GO:1901215)	3/80	0.113892	0.335609	0	0	2.62732	5.70788	GDNF;NDNF;SORL1
Positive Regulation Of Cell Adhesion (GO:0045785)	3/80	0.113892	0.335609	0	0	2.62732	5.70788	EPHA4;NDNF;PLPP3
Regulation Of Cell Population Proliferation (GO:0042127)	14/666	0.115598	0.335609	0	0	1.46236	3.15525	EPHA4;TSC22D1;IRS1;NPR3;PROX1;ZFP36L1;MEIS1;GRK5;GDNF;DDAH1;PDGFC;FGF18;SOX4;FGFR1
Cardiac Ventricle Morphogenesis (GO:0003208)	2/40	0.116994	0.335609	0	0	3.54346	7.60294	PROX1;SOX4
Cellular Response To Amino Acid Starvation (GO:0034198)	2/40	0.116994	0.335609	0	0	3.54346	7.60294	SESN3;PRKD1
Synaptic Vesicle Exocytosis (GO:0016079)	2/40	0.116994	0.335609	0	0	3.54346	7.60294	RIMS4;SYT2
Triglyceride Metabolic Process (GO:0006641)	2/40	0.116994	0.335609	0	0	3.54346	7.60294	PNPLA3;LPIN1
Regulation Of Osteoblast Differentiation (GO:0045667)	3/81	0.117058	0.335609	0	0	2.59349	5.56327	FBN2;PRKD1;BMP7
Positive Regulation Of MAP Kinase Activity (GO:0043406)	3/81	0.117058	0.335609	0	0	2.59349	5.56327	PDGFC;FGF18;FGFR1
Intracellular Calcium Ion Homeostasis (GO:0006874)	4/127	0.11791	0.335609	0	0	2.19569	4.69402	SLC24A2;RYR2;CASQ2;SLC8A1
Regulation Of Cell Differentiation (GO:0045595)	5/176	0.118673	0.335609	0	0	1.9764	4.21247	GDNF;ALOX5;NREP;ZFP36L1;FGFR1
Cellular Response To Chemical Stress (GO:0062197)	3/82	0.120256	0.335609	0	0	2.56052	5.42351	MSRA;MGAT3;PRKD1
Positive Regulation Of Canonical Wnt Signaling Pathway (GO:0090263)	3/82	0.120256	0.335609	0	0	2.56052	5.42351	DAAM2;SOX4;ZBED3
Regulation Of Insulin Receptor Signaling Pathway (GO:0046626)	2/41	0.121853	0.335609	0	0	3.4524	7.26711	IRS1;SORL1
Synaptic Vesicle Recycling (GO:0036465)	2/41	0.121853	0.335609	0	0	3.4524	7.26711	SYT2;STON2
Negative Regulation Of ERK1 And ERK2 Cascade (GO:0070373)	2/41	0.121853	0.335609	0	0	3.4524	7.26711	EPHA4;DUSP3
Oligosaccharide Metabolic Process (GO:0009311)	2/41	0.121853	0.335609	0	0	3.4524	7.26711	ST3GAL4;GAL3ST3
Positive Regulation Of Peptide Hormone Secretion (GO:0090277)	2/41	0.121853	0.335609	0	0	3.4524	7.26711	MYRIP;SOX4
Regulation Of Cellular Component Size (GO:0032535)	2/41	0.121853	0.335609	0	0	3.4524	7.26711	RAP1GAP2;NEB
Regulation Of Cold-Induced Thermogenesis (GO:0120161)	4/129	0.1229	0.335609	0	0	2.16031	4.52884	NPR3;PDGFC;ESRRG;LPIN1
Positive Regulation Of Protein Catabolic Process (GO:0045732)	3/83	0.123487	0.335609	0	0	2.52837	5.28838	ASB5;SORL1;SH3D19
Supramolecular Fiber Organization (GO:0097435)	7/282	0.123639	0.335609	0	0	1.72365	3.60311	MYO1E;BFSP2;KIF2A;SHROOM2;MAPT;HDGFL3;ZBED3
Regulation Of Fatty Acid Metabolic Process (GO:0019217)	1/9	0.124927	0.335609	0	0	8.3979	17.4678	PDK4
Regulation Of Hair Cycle (GO:0042634)	1/9	0.124927	0.335609	0	0	8.3979	17.4678	CLOCK
SNARE Complex Assembly (GO:0035493)	1/9	0.124927	0.335609	0	0	8.3979	17.4678	STXBP1
Regulation Of Lamellipodium Morphogenesis (GO:2000392)	1/9	0.124927	0.335609	0	0	8.3979	17.4678	RREB1
Adult Locomotory Behavior (GO:0008344)	1/9	0.124927	0.335609	0	0	8.3979	17.4678	GDNF
Angiogenesis Involved In Wound Healing (GO:0060055)	1/9	0.124927	0.335609	0	0	8.3979	17.4678	NDNF
Apical Protein Localization (GO:0045176)	1/9	0.124927	0.335609	0	0	8.3979	17.4678	SHROOM2
Arginine Metabolic Process (GO:0006525)	1/9	0.124927	0.335609	0	0	8.3979	17.4678	DDAH1
Regulation Of Phospholipase Activity (GO:0010517)	1/9	0.124927	0.335609	0	0	8.3979	17.4678	FGFR1
cAMP Biosynthetic Process (GO:0006171)	1/9	0.124927	0.335609	0	0	8.3979	17.4678	ADCY8
Camera-Type Eye Morphogenesis (GO:0048593)	1/9	0.124927	0.335609	0	0	8.3979	17.4678	SHROOM2
Regulation Of Sensory Perception (GO:0051931)	1/9	0.124927	0.335609	0	0	8.3979	17.4678	MGLL
Regulation Of Sequestering Of Calcium Ion (GO:0051282)	1/9	0.124927	0.335609	0	0	8.3979	17.4678	RYR2
Cellular Response To UV-B (GO:0071493)	1/9	0.124927	0.335609	0	0	8.3979	17.4678	MME
Cellular Response To Leucine (GO:0071233)	1/9	0.124927	0.335609	0	0	8.3979	17.4678	SESN3
Regulation Of Triglyceride Catabolic Process (GO:0010896)	1/9	0.124927	0.335609	0	0	8.3979	17.4678	SORL1
Columnar/Cuboidal Epithelial Cell Differentiation (GO:0002065)	1/9	0.124927	0.335609	0	0	8.3979	17.4678	SOX4
Response To Leucine (GO:0043201)	1/9	0.124927	0.335609	0	0	8.3979	17.4678	SESN3
Dopamine Transport (GO:0015872)	1/9	0.124927	0.335609	0	0	8.3979	17.4678	SLC22A3
Sarcoplasmic Reticulum Calcium Ion Transport (GO:0070296)	1/9	0.124927	0.335609	0	0	8.3979	17.4678	RYR2
Sequestering Of Extracellular Ligand From Receptor (GO:0035581)	1/9	0.124927	0.335609	0	0	8.3979	17.4678	FBN2
Smooth Muscle Tissue Development (GO:0048745)	1/9	0.124927	0.335609	0	0	8.3979	17.4678	PROX1
Toxin Transport (GO:1901998)	1/9	0.124927	0.335609	0	0	8.3979	17.4678	SLC22A3
Glycerolipid Metabolic Process (GO:0046486)	1/9	0.124927	0.335609	0	0	8.3979	17.4678	PNPLA3
Glycine Transport (GO:0015816)	1/9	0.124927	0.335609	0	0	8.3979	17.4678	SLC6A17
Vasoconstriction (GO:0042310)	1/9	0.124927	0.335609	0	0	8.3979	17.4678	SLC8A1
Lipid Import Into Cell (GO:0140354)	1/9	0.124927	0.335609	0	0	8.3979	17.4678	ACSL3
Long-Chain Fatty Acid Import Into Cell (GO:0044539)	1/9	0.124927	0.335609	0	0	8.3979	17.4678	ACSL3
Medium-Chain Fatty Acid Metabolic Process (GO:0051791)	1/9	0.124927	0.335609	0	0	8.3979	17.4678	ABHD2
Myelin Assembly (GO:0032288)	1/9	0.124927	0.335609	0	0	8.3979	17.4678	EPB41L3
Negative Regulation Of Autophagosome Assembly (GO:1902902)	1/9	0.124927	0.335609	0	0	8.3979	17.4678	FEZ2
Negative Regulation Of Cell Cycle Phase Transition (GO:1901988)	1/9	0.124927	0.335609	0	0	8.3979	17.4678	ZFP36L1
Negative Regulation Of Establishment Of Protein Localization (GO:1904950)	1/9	0.124927	0.335609	0	0	8.3979	17.4678	MAPT
Negative Regulation Of Homotypic Cell-Cell Adhesion (GO:0034111)	1/9	0.124927	0.335609	0	0	8.3979	17.4678	PRKG1
Negative Regulation Of Interferon-Beta Production (GO:0032688)	1/9	0.124927	0.335609	0	0	8.3979	17.4678	REL
Negative Regulation Of Leukocyte Chemotaxis (GO:0002689)	1/9	0.124927	0.335609	0	0	8.3979	17.4678	SLIT2
Negative Regulation Of Nuclear Division (GO:0051784)	1/9	0.124927	0.335609	0	0	8.3979	17.4678	BMP7
Negative Regulation Of Potassium Ion Transmembrane Transporter Activity (GO:1901017)	1/9	0.124927	0.335609	0	0	8.3979	17.4678	CASQ2
Negative Regulation Of Voltage-Gated Potassium Channel Activity (GO:1903817)	1/9	0.124927	0.335609	0	0	8.3979	17.4678	KCNE1
Phasic Smooth Muscle Contraction (GO:0014821)	1/9	0.124927	0.335609	0	0	8.3979	17.4678	GDNF
Positive Regulation Of Dendrite Development (GO:1900006)	1/9	0.124927	0.335609	0	0	8.3979	17.4678	BMP7
Positive Regulation Of Lipase Activity (GO:0060193)	1/9	0.124927	0.335609	0	0	8.3979	17.4678	FGFR1
Regulation Of ER To Golgi Vesicle-Mediated Transport (GO:0060628)	1/9	0.124927	0.335609	0	0	8.3979	17.4678	SORL1
T Cell Differentiation (GO:0030217)	2/42	0.12676	0.335609	0	0	3.3659	6.95214	SOX4;ZFP36L1
Cognition (GO:0050890)	2/42	0.12676	0.335609	0	0	3.3659	6.95214	MGAT3;ST3GAL4
Ephrin Receptor Signaling Pathway (GO:0048013)	2/42	0.12676	0.335609	0	0	3.3659	6.95214	EPHA4;EPHB1
Negative Regulation Of BMP Signaling Pathway (GO:0030514)	2/42	0.12676	0.335609	0	0	3.3659	6.95214	BMPER;SORL1
Neural Crest Cell Development (GO:0014032)	2/42	0.12676	0.335609	0	0	3.3659	6.95214	GDNF;SEMA3A
Positive Regulation Of Transferase Activity (GO:0051347)	4/131	0.127979	0.335609	0	0	2.12605	4.3709	CHTF8;ROR1;SORL1;FGFR1
Regulation Of Phosphatidylinositol 3-Kinase Signaling (GO:0014066)	3/85	0.130042	0.335609	0	0	2.46642	5.03124	PDGFC;ROR1;FGFR1
Sodium Ion Transport (GO:0006814)	3/85	0.130042	0.335609	0	0	2.46642	5.03124	SLC24A2;SLC6A17;SLC8A1
Amino Acid Transport (GO:0006865)	2/43	0.131713	0.335609	0	0	3.28362	6.65633	SLC43A2;SLC6A17
Response To Glucose (GO:0009749)	2/43	0.131713	0.335609	0	0	3.28362	6.65633	SOX4;ZBED3
Insulin Receptor Signaling Pathway (GO:0008286)	2/43	0.131713	0.335609	0	0	3.28362	6.65633	IRS1;PDK4
Neurogenesis (GO:0022008)	2/43	0.131713	0.335609	0	0	3.28362	6.65633	MAPT;EPHB1
Positive Regulation Of Nervous System Development (GO:0051962)	2/43	0.131713	0.335609	0	0	3.28362	6.65633	MME;EPHB1
Positive Regulation Of Cellular Catabolic Process (GO:0031331)	4/133	0.133146	0.335609	0	0	2.09284	4.21983	LIN28B;IRS1;PRKD1;SH3D19
Sphingolipid Metabolic Process (GO:0006665)	3/86	0.133365	0.335609	0	0	2.43656	4.90886	ELOVL5;PRKD1;PLPP3
Regulation Of Actin Cytoskeleton Organization (GO:0032956)	3/86	0.133365	0.335609	0	0	2.43656	4.90886	DAAM2;ARHGEF19;NEB
Sensory Perception (GO:0007600)	2/44	0.136709	0.335609	0	0	3.20525	6.37813	MME;TMEM150C
Epithelial To Mesenchymal Transition (GO:0001837)	2/44	0.136709	0.335609	0	0	3.20525	6.37813	BMP7;FGFR1
Negative Regulation Of MAP Kinase Activity (GO:0043407)	2/44	0.136709	0.335609	0	0	3.20525	6.37813	BMP7;SORL1
Positive Regulation Of miRNA Metabolic Process (GO:2000630)	2/44	0.136709	0.335609	0	0	3.20525	6.37813	LIN28B;TEAD1
Positive Regulation Of Cold-Induced Thermogenesis (GO:0120162)	3/87	0.136717	0.335609	0	0	2.40742	4.79038	PDGFC;ESRRG;LPIN1
Protein-Containing Complex Assembly (GO:0065003)	7/290	0.137142	0.335609	0	0	1.67415	3.3261	ANGPT1;STXBP1;CASQ2;ANO6;MAPT;ADCY8;TEAD1
CRD-mediated mRNA Stabilization (GO:0070934)	1/10	0.13781	0.335609	0	0	7.46438	14.7935	IGF2BP2
DNA Conformation Change (GO:0071103)	1/10	0.13781	0.335609	0	0	7.46438	14.7935	HMGB3
N-acetylneuraminate Metabolic Process (GO:0006054)	1/10	0.13781	0.335609	0	0	7.46438	14.7935	ST6GAL1
Astrocyte Activation (GO:0048143)	1/10	0.13781	0.335609	0	0	7.46438	14.7935	MAPT
Atrial Cardiac Muscle Tissue Development (GO:0003228)	1/10	0.13781	0.335609	0	0	7.46438	14.7935	PROX1
Atrial Septum Morphogenesis (GO:0060413)	1/10	0.13781	0.335609	0	0	7.46438	14.7935	SOX4
cAMP Metabolic Process (GO:0046058)	1/10	0.13781	0.335609	0	0	7.46438	14.7935	ADCY8
Cardiac Muscle Cell Membrane Repolarization (GO:0099622)	1/10	0.13781	0.335609	0	0	7.46438	14.7935	KCNE1
Regulation Of Response To Oxidative Stress (GO:1902882)	1/10	0.13781	0.335609	0	0	7.46438	14.7935	ALOX5
Regulation Of Response To Stress (GO:0080134)	1/10	0.13781	0.335609	0	0	7.46438	14.7935	ADCY8
Regulation Of Sensory Perception Of Pain (GO:0051930)	1/10	0.13781	0.335609	0	0	7.46438	14.7935	MGLL
Cellular Response To Forskolin (GO:1904322)	1/10	0.13781	0.335609	0	0	7.46438	14.7935	ADCY8
Central Nervous System Neuron Axonogenesis (GO:0021955)	1/10	0.13781	0.335609	0	0	7.46438	14.7935	EPHB1
Response To UV-A (GO:0070141)	1/10	0.13781	0.335609	0	0	7.46438	14.7935	MME
Response To Forskolin (GO:1904321)	1/10	0.13781	0.335609	0	0	7.46438	14.7935	ADCY8
Diol Metabolic Process (GO:0034311)	1/10	0.13781	0.335609	0	0	7.46438	14.7935	PLPP3
Epithelial Cell Apoptotic Process (GO:1904019)	1/10	0.13781	0.335609	0	0	7.46438	14.7935	RYR2
Ganglion Development (GO:0061548)	1/10	0.13781	0.335609	0	0	7.46438	14.7935	SEMA3A
Triglyceride Catabolic Process (GO:0019433)	1/10	0.13781	0.335609	0	0	7.46438	14.7935	PNPLA3
Insulin-Like Growth Factor Receptor Signaling Pathway (GO:0048009)	1/10	0.13781	0.335609	0	0	7.46438	14.7935	IRS1
Intrinsic Apoptotic Signaling Pathway In Response To Oxidative Stress (GO:0008631)	1/10	0.13781	0.335609	0	0	7.46438	14.7935	STK24
Magnesium Ion Transport (GO:0015693)	1/10	0.13781	0.335609	0	0	7.46438	14.7935	NIPA1
Mesonephros Development (GO:0001823)	1/10	0.13781	0.335609	0	0	7.46438	14.7935	BMP7
miRNA Catabolic Process (GO:0010587)	1/10	0.13781	0.335609	0	0	7.46438	14.7935	LIN28B
Monoamine Transport (GO:0015844)	1/10	0.13781	0.335609	0	0	7.46438	14.7935	SLC22A3
Negative Regulation Of Inclusion Body Assembly (GO:0090084)	1/10	0.13781	0.335609	0	0	7.46438	14.7935	SORL1
Negative Regulation Of Locomotion (GO:0040013)	1/10	0.13781	0.335609	0	0	7.46438	14.7935	DUSP3
Negative Regulation Of Potassium Ion Transmembrane Transport (GO:1901380)	1/10	0.13781	0.335609	0	0	7.46438	14.7935	CASQ2
Negative Regulation Of Release Of Sequestered Calcium Ion Into Cytosol (GO:0051280)	1/10	0.13781	0.335609	0	0	7.46438	14.7935	CASQ2
Negative Regulation Of Ryanodine-Sensitive Calcium-Release Channel Activity (GO:0060315)	1/10	0.13781	0.335609	0	0	7.46438	14.7935	CASQ2
Negative Regulation Of Sprouting Angiogenesis (GO:1903671)	1/10	0.13781	0.335609	0	0	7.46438	14.7935	ALOX5
Neuron Projection Fasciculation (GO:0106030)	1/10	0.13781	0.335609	0	0	7.46438	14.7935	EPHA4
Pentose-Phosphate Shunt (GO:0006098)	1/10	0.13781	0.335609	0	0	7.46438	14.7935	H6PD
Podocyte Differentiation (GO:0072112)	1/10	0.13781	0.335609	0	0	7.46438	14.7935	MYO1E
Positive Regulation Of Circadian Rhythm (GO:0042753)	1/10	0.13781	0.335609	0	0	7.46438	14.7935	CLOCK
Positive Regulation Of Coagulation (GO:0050820)	1/10	0.13781	0.335609	0	0	7.46438	14.7935	ST3GAL4
Positive Regulation Of Glycogen Biosynthetic Process (GO:0045725)	1/10	0.13781	0.335609	0	0	7.46438	14.7935	IRS1
Positive Regulation Of Hemostasis (GO:1900048)	1/10	0.13781	0.335609	0	0	7.46438	14.7935	ST3GAL4
Positive Regulation Of Heterotypic Cell-Cell Adhesion (GO:0034116)	1/10	0.13781	0.335609	0	0	7.46438	14.7935	BMP7
Positive Regulation Of Neuron Migration (GO:2001224)	1/10	0.13781	0.335609	0	0	7.46438	14.7935	SEMA3A
Positive Regulation Of Secretion (GO:0051047)	1/10	0.13781	0.335609	0	0	7.46438	14.7935	ACSL3
Positive Regulation Of Vascular Endothelial Cell Proliferation (GO:1905564)	1/10	0.13781	0.335609	0	0	7.46438	14.7935	FGFR1
Potassium Ion Export Across Plasma Membrane (GO:0097623)	1/10	0.13781	0.335609	0	0	7.46438	14.7935	KCNE1
Regulation Of Adipose Tissue Development (GO:1904177)	1/10	0.13781	0.335609	0	0	7.46438	14.7935	SORL1
Regulation Of Cellular Ketone Metabolic Process (GO:0010565)	1/10	0.13781	0.335609	0	0	7.46438	14.7935	PDK4
Retrograde Vesicle-Mediated Transport, Golgi To Endoplasmic Reticulum (GO:0006890)	2/45	0.141747	0.34469	0	0	3.13054	6.11615	HTT;PLPP3
Axon Development (GO:0061564)	3/89	0.143507	0.346571	0	0	2.35116	4.56448	RTN4RL1;NREP;MAPT
Neuron Projection Morphogenesis (GO:0048812)	4/138	0.146425	0.346571	0	0	2.01418	3.86972	EPHA4;EPB41L3;EPHB1;BMP7
Regulation Of Epithelial Cell Migration (GO:0010632)	2/46	0.146825	0.346571	0	0	3.05921	5.86915	BMPER;RREB1
Chloride Transmembrane Transport (GO:1902476)	2/46	0.146825	0.346571	0	0	3.05921	5.86915	ANO6;ANO4
Negative Regulation Of Protein Phosphorylation (GO:0001933)	4/139	0.149141	0.346571	0	0	1.99914	3.80409	SLIT2;PLPP3;SH3GL2;ZBED3
Negative Regulation Of Cell Differentiation (GO:0045596)	5/190	0.149264	0.346571	0	0	1.82537	3.47193	EPHA4;MEIS1;BMP7;SOX4;MARK1
Regulation Of Endocytic Recycling (GO:2001135)	1/11	0.150504	0.346571	0	0	6.71756	12.7215	SORL1
Regulation Of Leukocyte Tethering Or Rolling (GO:1903236)	1/11	0.150504	0.346571	0	0	6.71756	12.7215	ST3GAL4
Regulation Of mRNA 3'-End Processing (GO:0031440)	1/11	0.150504	0.346571	0	0	6.71756	12.7215	ZFP36L1
Regulation Of Phospholipase C Activity (GO:1900274)	1/11	0.150504	0.346571	0	0	6.71756	12.7215	FGFR1
Regulation Of Protein Exit From Endoplasmic Reticulum (GO:0070861)	1/11	0.150504	0.346571	0	0	6.71756	12.7215	SORL1
Cell Differentiation In Hindbrain (GO:0021533)	1/11	0.150504	0.346571	0	0	6.71756	12.7215	PROX1
Cell Part Morphogenesis (GO:0032990)	1/11	0.150504	0.346571	0	0	6.71756	12.7215	PACSIN2
Cellular Response To Acidic pH (GO:0071468)	1/11	0.150504	0.346571	0	0	6.71756	12.7215	RAB11FIP5
Cellular Response To Leucine Starvation (GO:1990253)	1/11	0.150504	0.346571	0	0	6.71756	12.7215	SESN3
Regulation Of Ventricular Cardiac Muscle Cell Action Potential (GO:0098911)	1/11	0.150504	0.346571	0	0	6.71756	12.7215	RYR2
Relaxation Of Cardiac Muscle (GO:0055119)	1/11	0.150504	0.346571	0	0	6.71756	12.7215	SLC8A1
Endothelial Cell Differentiation (GO:0045446)	1/11	0.150504	0.346571	0	0	6.71756	12.7215	PROX1
Sphingoid Metabolic Process (GO:0046519)	1/11	0.150504	0.346571	0	0	6.71756	12.7215	PLPP3
Lipid Droplet Formation (GO:0140042)	1/11	0.150504	0.346571	0	0	6.71756	12.7215	CDS1
Mitochondrion Distribution (GO:0048311)	1/11	0.150504	0.346571	0	0	6.71756	12.7215	MAPT
ncRNA Transcription (GO:0098781)	1/11	0.150504	0.346571	0	0	6.71756	12.7215	ZFP36L1
Negative Regulation Of Mononuclear Cell Migration (GO:0071676)	1/11	0.150504	0.346571	0	0	6.71756	12.7215	SLIT2
Negative Regulation Of Potassium Ion Transport (GO:0043267)	1/11	0.150504	0.346571	0	0	6.71756	12.7215	CASQ2
Neurotransmitter Uptake (GO:0001504)	1/11	0.150504	0.346571	0	0	6.71756	12.7215	SLC22A3
Phospholipid Homeostasis (GO:0055091)	1/11	0.150504	0.346571	0	0	6.71756	12.7215	ANGPTL3
Positive Regulation Of Branching Involved In Ureteric Bud Morphogenesis (GO:0090190)	1/11	0.150504	0.346571	0	0	6.71756	12.7215	GDNF
Positive Regulation Of Cytoplasmic Transport (GO:1903651)	1/11	0.150504	0.346571	0	0	6.71756	12.7215	SORL1
Positive Regulation Of Glycogen Metabolic Process (GO:0070875)	1/11	0.150504	0.346571	0	0	6.71756	12.7215	IRS1
Positive Regulation Of Protein Exit From Endoplasmic Reticulum (GO:0070863)	1/11	0.150504	0.346571	0	0	6.71756	12.7215	SORL1
Positive Regulation Of Protein Maturation (GO:1903319)	1/11	0.150504	0.346571	0	0	6.71756	12.7215	SOX4
Positive Regulation Of Superoxide Anion Generation (GO:0032930)	1/11	0.150504	0.346571	0	0	6.71756	12.7215	MAPT
Quaternary Ammonium Group Transport (GO:0015697)	1/11	0.150504	0.346571	0	0	6.71756	12.7215	SLC22A3
Regulation Of SNARE Complex Assembly (GO:0035542)	1/11	0.150504	0.346571	0	0	6.71756	12.7215	STXBP1
Regulation Of Alcohol Biosynthetic Process (GO:1902930)	1/11	0.150504	0.346571	0	0	6.71756	12.7215	H6PD
Regulation Of Astrocyte Differentiation (GO:0048710)	1/11	0.150504	0.346571	0	0	6.71756	12.7215	EPHA4
Regulation Of Branching Involved In Ureteric Bud Morphogenesis (GO:0090189)	1/11	0.150504	0.346571	0	0	6.71756	12.7215	GDNF
Negative Regulation Of Cellular Process (GO:0048523)	10/466	0.150987	0.346571	0	0	1.48689	2.81107	EPHA4;DDAH1;ANGPT1;ALOX5;PROX1;SLIT2;BMP7;SOX4;PLXNA4;DCBLD2
Regulation Of Canonical Wnt Signaling Pathway (GO:0060828)	5/191	0.151568	0.346571	0	0	1.81545	3.42526	TMEM88B;DAAM2;SOX4;ZBED3;SHISA6
Cellular Response To Alcohol (GO:0097306)	2/47	0.151939	0.346571	0	0	2.99106	5.63599	ADCY1;ADCY8
Intracellular Iron Ion Homeostasis (GO:0006879)	2/47	0.151939	0.346571	0	0	2.99106	5.63599	HJV;CP
mRNA Stabilization (GO:0048255)	2/47	0.151939	0.346571	0	0	2.99106	5.63599	GDNF;IGF2BP2
Peptide Metabolic Process (GO:0006518)	2/47	0.151939	0.346571	0	0	2.99106	5.63599	MME;MGAT3
Plasma Membrane Bounded Cell Projection Morphogenesis (GO:0120039)	2/47	0.151939	0.346571	0	0	2.99106	5.63599	EPB41L3;BMP7
Positive Regulation Of Phagocytosis (GO:0050766)	2/47	0.151939	0.346571	0	0	2.99106	5.63599	RAB31;ANO6
Positive Regulation Of Cell Migration (GO:0030335)	6/245	0.153811	0.34959	0	0	1.69686	3.17657	EPHA4;DAAM2;SEMA3A;PDGFC;ANGPTL3;RREB1
Regulation Of GTPase Activity (GO:0043087)	5/192	0.153886	0.34959	0	0	1.80564	3.37934	RTN4R;EPHA4;RGS6;PLXNA4;PRKG1
Positive Regulation Of Metabolic Process (GO:0009893)	3/92	0.153895	0.34959	0	0	2.27152	4.25111	PDGFC;ESRRG;LPIN1
Cellular Response To Organic Cyclic Compound (GO:0071407)	4/141	0.154631	0.35078	0	0	1.96973	3.67692	KCNE1;ADCY1;ADCY8;ZFP36L1
Cardiac Muscle Tissue Development (GO:0048738)	2/48	0.157087	0.351495	0	0	2.92587	5.41565	ADAMTS9;BMP7
Cellular Response To Peptide (GO:1901653)	2/48	0.157087	0.351495	0	0	2.92587	5.41565	EPHA4;ZFP36L1
Purine Ribonucleotide Biosynthetic Process (GO:0009152)	2/48	0.157087	0.351495	0	0	2.92587	5.41565	ADCY1;ADCY8
Positive Regulation Of Autophagy (GO:0010508)	3/93	0.15741	0.351495	0	0	2.24615	4.15292	SESN3;HTT;PRKD1
Regulation Of Synapse Assembly (GO:0051963)	2/49	0.162268	0.351495	0	0	2.86345	5.2072	GPC4;EPHB1
Negative Regulation Of TOR Signaling (GO:0032007)	2/49	0.162268	0.351495	0	0	2.86345	5.2072	SESN3;DDIT4
Alanine Transport (GO:0032328)	1/12	0.163012	0.351495	0	0	6.10652	11.0768	SLC6A17
Aspartate Family Amino Acid Metabolic Process (GO:0009066)	1/12	0.163012	0.351495	0	0	6.10652	11.0768	MSRA
Axonal Fasciculation (GO:0007413)	1/12	0.163012	0.351495	0	0	6.10652	11.0768	EPHA4
Axonal Transport Of Mitochondrion (GO:0019896)	1/12	0.163012	0.351495	0	0	6.10652	11.0768	MAPT
Cardiac Right Ventricle Morphogenesis (GO:0003215)	1/12	0.163012	0.351495	0	0	6.10652	11.0768	SOX4
Cell Projection Assembly (GO:0030031)	1/12	0.163012	0.351495	0	0	6.10652	11.0768	PARVB
Regulation Of Superoxide Anion Generation (GO:0032928)	1/12	0.163012	0.351495	0	0	6.10652	11.0768	MAPT
Endochondral Bone Morphogenesis (GO:0060350)	1/12	0.163012	0.351495	0	0	6.10652	11.0768	COL13A1
Spinal Cord Development (GO:0021510)	1/12	0.163012	0.351495	0	0	6.10652	11.0768	SOX4
Eye Photoreceptor Cell Development (GO:0042462)	1/12	0.163012	0.351495	0	0	6.10652	11.0768	RPGRIP1L
Fatty Acid Elongation (GO:0030497)	1/12	0.163012	0.351495	0	0	6.10652	11.0768	ELOVL5
Glucosamine-Containing Compound Metabolic Process (GO:1901071)	1/12	0.163012	0.351495	0	0	6.10652	11.0768	MGAT3
Glutamine Family Amino Acid Catabolic Process (GO:0009065)	1/12	0.163012	0.351495	0	0	6.10652	11.0768	DDAH1
Very Long-Chain Fatty Acid Biosynthetic Process (GO:0042761)	1/12	0.163012	0.351495	0	0	6.10652	11.0768	ELOVL5
Keratan Sulfate Biosynthetic Process (GO:0018146)	1/12	0.163012	0.351495	0	0	6.10652	11.0768	ST3GAL4
Lipid Oxidation (GO:0034440)	1/12	0.163012	0.351495	0	0	6.10652	11.0768	ALOX5
Microtubule-Based Transport (GO:0099111)	1/12	0.163012	0.351495	0	0	6.10652	11.0768	HTT
Monoacylglycerol Metabolic Process (GO:0046462)	1/12	0.163012	0.351495	0	0	6.10652	11.0768	MGLL
Multicellular Organismal-Level Iron Ion Homeostasis (GO:0060586)	1/12	0.163012	0.351495	0	0	6.10652	11.0768	HJV
Negative Regulation Of Fibroblast Growth Factor Receptor Signaling Pathway (GO:0040037)	1/12	0.163012	0.351495	0	0	6.10652	11.0768	SULF2
Negative Regulation Of Myoblast Differentiation (GO:0045662)	1/12	0.163012	0.351495	0	0	6.10652	11.0768	SOX4
Neuron Cell-Cell Adhesion (GO:0007158)	1/12	0.163012	0.351495	0	0	6.10652	11.0768	NINJ2
Plasma Membrane Tubulation (GO:0097320)	1/12	0.163012	0.351495	0	0	6.10652	11.0768	PACSIN2
Positive Regulation Of DNA-directed DNA Polymerase Activity (GO:1900264)	1/12	0.163012	0.351495	0	0	6.10652	11.0768	CHTF8
Positive Regulation Of Brown Fat Cell Differentiation (GO:0090336)	1/12	0.163012	0.351495	0	0	6.10652	11.0768	RREB1
Positive Regulation Of Endothelial Cell Apoptotic Process (GO:2000353)	1/12	0.163012	0.351495	0	0	6.10652	11.0768	ANO6
Positive Regulation Of Fatty Acid Oxidation (GO:0046321)	1/12	0.163012	0.351495	0	0	6.10652	11.0768	IRS1
Positive Regulation Of Histone Deacetylation (GO:0031065)	1/12	0.163012	0.351495	0	0	6.10652	11.0768	PRKD1
Positive Regulation Of Long-Term Synaptic Potentiation (GO:1900273)	1/12	0.163012	0.351495	0	0	6.10652	11.0768	ADCY8
Positive Regulation Of Membrane Protein Ectodomain Proteolysis (GO:0051044)	1/12	0.163012	0.351495	0	0	6.10652	11.0768	SH3D19
pre-miRNA Processing (GO:0031054)	1/12	0.163012	0.351495	0	0	6.10652	11.0768	LIN28B
Regulation Of DNA-directed DNA Polymerase Activity (GO:1900262)	1/12	0.163012	0.351495	0	0	6.10652	11.0768	CHTF8
Regulation Of Myoblast Differentiation (GO:0045661)	2/50	0.16748	0.359258	0	0	2.80364	5.0098	SOX4;ZFP36L1
Blood Vessel Morphogenesis (GO:0048514)	2/50	0.16748	0.359258	0	0	2.80364	5.0098	ANGPTL3;PROX1
Carboxylic Acid Transport (GO:0046942)	2/50	0.16748	0.359258	0	0	2.80364	5.0098	SLC43A2;SLC16A9
Neurotransmitter Transport (GO:0006836)	2/50	0.16748	0.359258	0	0	2.80364	5.0098	SLC22A3;STXBP1
Regulation Of Wnt Signaling Pathway (GO:0030111)	3/97	0.171709	0.359806	0	0	2.15008	3.78835	DAAM2;CXXC4;SULF2
Negative Regulation Of Gene Expression (GO:0010629)	7/309	0.171922	0.359806	0	0	1.5671	2.75923	EPHA4;TRIM2;REL;MAPT;IGF2BP2;SH3GL2;MARK1
Glycoprotein Metabolic Process (GO:0009100)	2/51	0.17272	0.359806	0	0	2.74627	4.82267	MAN1C1;ST3GAL4
Mesenchymal Cell Differentiation (GO:0048762)	2/51	0.17272	0.359806	0	0	2.74627	4.82267	BMP7;FGFR1
Regulation Of Fatty Acid Beta-Oxidation (GO:0031998)	1/13	0.175337	0.359806	0	0	5.59733	9.74521	IRS1
N-acetylglucosamine Metabolic Process (GO:0006044)	1/13	0.175337	0.359806	0	0	5.59733	9.74521	MGAT3
T Cell Differentiation In Thymus (GO:0033077)	1/13	0.175337	0.359806	0	0	5.59733	9.74521	ZFP36L1
Adenylate Cyclase-Activating Adrenergic Receptor Signaling Pathway (GO:0071880)	1/13	0.175337	0.359806	0	0	5.59733	9.74521	ADRA1B
Amyloid Precursor Protein Catabolic Process (GO:0042987)	1/13	0.175337	0.359806	0	0	5.59733	9.74521	ADAM19
Regulation Of Monocyte Differentiation (GO:0045655)	1/13	0.175337	0.359806	0	0	5.59733	9.74521	ZFP36L1
Cardiac Left Ventricle Morphogenesis (GO:0003214)	1/13	0.175337	0.359806	0	0	5.59733	9.74521	RYR2
Regulation Of Short-Term Neuronal Synaptic Plasticity (GO:0048172)	1/13	0.175337	0.359806	0	0	5.59733	9.74521	SHISA6
Cellular Response To Corticosteroid Stimulus (GO:0071384)	1/13	0.175337	0.359806	0	0	5.59733	9.74521	ZFP36L1
Regulation Of Systemic Arterial Blood Pressure (GO:0003073)	1/13	0.175337	0.359806	0	0	5.59733	9.74521	DDAH1
Regulation Of Transforming Growth Factor Beta Production (GO:0071634)	1/13	0.175337	0.359806	0	0	5.59733	9.74521	ITGB6
Relaxation Of Muscle (GO:0090075)	1/13	0.175337	0.359806	0	0	5.59733	9.74521	SLC8A1
Response To UV-B (GO:0010224)	1/13	0.175337	0.359806	0	0	5.59733	9.74521	MME
Response To Nerve Growth Factor (GO:1990089)	1/13	0.175337	0.359806	0	0	5.59733	9.74521	MAPT
Dendritic Spine Morphogenesis (GO:0060997)	1/13	0.175337	0.359806	0	0	5.59733	9.74521	EPHB1
Stabilization Of Membrane Potential (GO:0030322)	1/13	0.175337	0.359806	0	0	5.59733	9.74521	KCNK3
Establishment Of Protein Localization To Endoplasmic Reticulum (GO:0072599)	1/13	0.175337	0.359806	0	0	5.59733	9.74521	RYR2
Striated Muscle Tissue Development (GO:0014706)	1/13	0.175337	0.359806	0	0	5.59733	9.74521	BMP7
Establishment Of Spindle Localization (GO:0051293)	1/13	0.175337	0.359806	0	0	5.59733	9.74521	ZBED3
Heparan Sulfate Proteoglycan Metabolic Process (GO:0030201)	1/13	0.175337	0.359806	0	0	5.59733	9.74521	SULF2
Membrane Depolarization During Action Potential (GO:0086010)	1/13	0.175337	0.359806	0	0	5.59733	9.74521	SLC8A1
Membrane Repolarization During Action Potential (GO:0086011)	1/13	0.175337	0.359806	0	0	5.59733	9.74521	KCNE1
Membrane Repolarization During Cardiac Muscle Cell Action Potential (GO:0086013)	1/13	0.175337	0.359806	0	0	5.59733	9.74521	KCNE1
Pancreas Development (GO:0031016)	1/13	0.175337	0.359806	0	0	5.59733	9.74521	PROX1
Phagosome Maturation (GO:0090382)	1/13	0.175337	0.359806	0	0	5.59733	9.74521	RAB31
Positive Regulation Of Fatty Acid Biosynthetic Process (GO:0045723)	1/13	0.175337	0.359806	0	0	5.59733	9.74521	ELOVL5
Positive Regulation Of Potassium Ion Transport (GO:0043268)	1/13	0.175337	0.359806	0	0	5.59733	9.74521	KCNE1
Positive Regulation Of Transmembrane Transport (GO:0034764)	1/13	0.175337	0.359806	0	0	5.59733	9.74521	ANO6
Regulation Of cAMP-dependent Protein Kinase Activity (GO:2000479)	1/13	0.175337	0.359806	0	0	5.59733	9.74521	HTT
Regulation Of Neuron Apoptotic Process (GO:0043523)	3/98	0.17534	0.359806	0	0	2.12733	3.70374	GDNF;TRIM2;NDNF
Cellular Response To Organonitrogen Compound (GO:0071417)	3/98	0.17534	0.359806	0	0	2.12733	3.70374	KCNE1;SLIT2;ZFP36L1
Glycosaminoglycan Biosynthetic Process (GO:0006024)	2/52	0.177987	0.364334	0	0	2.69119	4.64511	ANGPT1;ST3GAL4
Monoatomic Anion Transmembrane Transport (GO:0098656)	2/52	0.177987	0.364334	0	0	2.69119	4.64511	ANO6;ANO4
Cellular Response To Salt (GO:1902075)	3/100	0.182667	0.371373	0	0	2.08323	3.54168	SYT2;ADCY1;ADCY8
Extracellular Matrix Organization (GO:0030198)	4/151	0.183159	0.371373	0	0	1.83469	3.1142	COL13A1;NDNF;ADAMTS9;COLQ
Sensory Organ Development (GO:0007423)	2/53	0.183278	0.371373	0	0	2.63827	4.47648	MEIS1;SHROOM2
Peptidyl-Tyrosine Modification (GO:0018212)	2/53	0.183278	0.371373	0	0	2.63827	4.47648	EPHA4;FGFR1
Regulation Of Protein Serine/Threonine Kinase Activity (GO:0071900)	3/101	0.186361	0.371373	0	0	2.06185	3.46406	HTT;SLC8A1;CCNJL
Regulation Of Clathrin-Dependent Endocytosis (GO:2000369)	1/14	0.187481	0.371373	0	0	5.16647	8.64909	SNAP91
Regulation Of Endothelial Cell Chemotaxis (GO:2001026)	1/14	0.187481	0.371373	0	0	5.16647	8.64909	PRKD1
RNA Phosphodiester Bond Hydrolysis, Endonucleolytic (GO:0090502)	1/14	0.187481	0.371373	0	0	5.16647	8.64909	ZC3H12C
Regulation Of Leukocyte Chemotaxis (GO:0002688)	1/14	0.187481	0.371373	0	0	5.16647	8.64909	SLIT2
Regulation Of Lipoprotein Lipase Activity (GO:0051004)	1/14	0.187481	0.371373	0	0	5.16647	8.64909	ANGPTL4
Astrocyte Development (GO:0014002)	1/14	0.187481	0.371373	0	0	5.16647	8.64909	MAPT
Regulation Of Non-Canonical Wnt Signaling Pathway (GO:2000050)	1/14	0.187481	0.371373	0	0	5.16647	8.64909	DAAM2
Cardiac Cell Development (GO:0055006)	1/14	0.187481	0.371373	0	0	5.16647	8.64909	SLC8A1
Central Nervous System Neuron Development (GO:0021954)	1/14	0.187481	0.371373	0	0	5.16647	8.64909	MAPT
Chondroitin Sulfate Metabolic Process (GO:0030204)	1/14	0.187481	0.371373	0	0	5.16647	8.64909	NDNF
Response To Acidic pH (GO:0010447)	1/14	0.187481	0.371373	0	0	5.16647	8.64909	RAB11FIP5
Smooth Muscle Contraction (GO:0006939)	1/14	0.187481	0.371373	0	0	5.16647	8.64909	SLC8A1
Keratan Sulfate Metabolic Process (GO:0042339)	1/14	0.187481	0.371373	0	0	5.16647	8.64909	ST3GAL4
Mitochondrion Transport Along Microtubule (GO:0047497)	1/14	0.187481	0.371373	0	0	5.16647	8.64909	MAPT
Negative Regulation Of T Cell Receptor Signaling Pathway (GO:0050860)	1/14	0.187481	0.371373	0	0	5.16647	8.64909	DUSP3
Negative Regulation Of Anoikis (GO:2000811)	1/14	0.187481	0.371373	0	0	5.16647	8.64909	PDK4
Negative Regulation Of Insulin Secretion (GO:0046676)	1/14	0.187481	0.371373	0	0	5.16647	8.64909	IRS1
Neurotrophin Signaling Pathway (GO:0038179)	1/14	0.187481	0.371373	0	0	5.16647	8.64909	DDIT4
Platelet-Derived Growth Factor Receptor Signaling Pathway (GO:0048008)	1/14	0.187481	0.371373	0	0	5.16647	8.64909	PDGFC
Positive Regulation Of Nitric-Oxide Synthase Activity (GO:0051000)	1/14	0.187481	0.371373	0	0	5.16647	8.64909	NPR3
Positive Regulation Of Nuclear-Transcribed mRNA Catabolic Process, Deadenylation-Dependent Decay (GO:1900153)	1/14	0.187481	0.371373	0	0	5.16647	8.64909	ZFP36L1
Protein Alpha-1,2-Demannosylation (GO:0036508)	1/14	0.187481	0.371373	0	0	5.16647	8.64909	MAN1C1
Regulation Of Extrinsic Apoptotic Signaling Pathway (GO:2001236)	2/54	0.188592	0.372684	0	0	2.58739	4.31619	HTT;FGFR1
Monoatomic Anion Transport (GO:0006820)	2/54	0.188592	0.372684	0	0	2.58739	4.31619	ANO6;ANO4
Negative Regulation Of Translation (GO:0017148)	3/102	0.190074	0.374718	0	0	2.04091	3.38861	EPHA4;TRIM2;IGF2BP2
Regulation Of JNK Cascade (GO:0046328)	3/102	0.190074	0.374718	0	0	2.04091	3.38861	DUSP3;SEMA3A;EPHB1
Organelle Organization (GO:0006996)	8/376	0.191242	0.375321	0	0	1.46991	2.43154	RAB30;RAB31;PNPLA3;PACSIN2;HTT;PRKD1;MARK1;SH3D19
Protein Processing (GO:0016485)	3/103	0.193806	0.375321	0	0	2.02038	3.31524	ADAM19;MME;HJV
Regulation Of Pathway-Restricted SMAD Protein Phosphorylation (GO:0060393)	2/55	0.193927	0.375321	0	0	2.53842	4.1637	BMPER;BMP7
Heart Morphogenesis (GO:0003007)	2/55	0.193927	0.375321	0	0	2.53842	4.1637	RYR2;ALPK2
Inorganic Anion Transport (GO:0015698)	2/55	0.193927	0.375321	0	0	2.53842	4.1637	ANO6;ANO4
Muscle Organ Development (GO:0007517)	2/55	0.193927	0.375321	0	0	2.53842	4.1637	NEB;KY
Negative Regulation Of Transmembrane Receptor Protein Serine/Threonine Kinase Signaling Pathway (GO:0090101)	3/104	0.197557	0.375321	0	0	2.00027	3.24389	BMPER;TET1;SORL1
Protein Ubiquitination (GO:0016567)	8/380	0.198691	0.375321	0	0	1.45376	2.34929	RNF157;HERC3;TRIM2;KLHL8;ASB4;ASB5;PDZRN3;DZIP3
BMP Signaling Pathway (GO:0030509)	2/56	0.199282	0.375321	0	0	2.49127	4.01851	HJV;BMP7
3'-UTR-mediated mRNA Destabilization (GO:0061158)	1/15	0.199446	0.375321	0	0	4.79716	7.73404	ZFP36L1
Regulation Of Cellular Response To Heat (GO:1900034)	1/15	0.199446	0.375321	0	0	4.79716	7.73404	MAPT
Regulation Of Delayed Rectifier Potassium Channel Activity (GO:1902259)	1/15	0.199446	0.375321	0	0	4.79716	7.73404	KCNE1
Activin Receptor Signaling Pathway (GO:0032924)	1/15	0.199446	0.375321	0	0	4.79716	7.73404	HJV
Regulation Of Lymphocyte Differentiation (GO:0045619)	1/15	0.199446	0.375321	0	0	4.79716	7.73404	ZFP36L1
Branching Involved In Ureteric Bud Morphogenesis (GO:0001658)	1/15	0.199446	0.375321	0	0	4.79716	7.73404	GDNF
Regulation Of Presynapse Assembly (GO:1905606)	1/15	0.199446	0.375321	0	0	4.79716	7.73404	GPC4
Regulation Of Presynapse Organization (GO:0099174)	1/15	0.199446	0.375321	0	0	4.79716	7.73404	GPC4
Cellular Response To Glucocorticoid Stimulus (GO:0071385)	1/15	0.199446	0.375321	0	0	4.79716	7.73404	ZFP36L1
Retrograde Axonal Transport (GO:0008090)	1/15	0.199446	0.375321	0	0	4.79716	7.73404	TMEM108
Dicarboxylic Acid Catabolic Process (GO:0043649)	1/15	0.199446	0.375321	0	0	4.79716	7.73404	ALDH1L2
Embryonic Axis Specification (GO:0000578)	1/15	0.199446	0.375321	0	0	4.79716	7.73404	CXXC4
Embryonic Heart Tube Development (GO:0035050)	1/15	0.199446	0.375321	0	0	4.79716	7.73404	RYR2
Synaptic Transmission, Cholinergic (GO:0007271)	1/15	0.199446	0.375321	0	0	4.79716	7.73404	COLQ
Glucose 6-Phosphate Metabolic Process (GO:0051156)	1/15	0.199446	0.375321	0	0	4.79716	7.73404	H6PD
Ureteric Bud Morphogenesis (GO:0060675)	1/15	0.199446	0.375321	0	0	4.79716	7.73404	GDNF
Hippo Signaling (GO:0035329)	1/15	0.199446	0.375321	0	0	4.79716	7.73404	TEAD1
miRNA Metabolic Process (GO:0010586)	1/15	0.199446	0.375321	0	0	4.79716	7.73404	LIN28B
Muscle Tissue Morphogenesis (GO:0060415)	1/15	0.199446	0.375321	0	0	4.79716	7.73404	PROX1
Negative Regulation Of Amyloid-Beta Formation (GO:1902430)	1/15	0.199446	0.375321	0	0	4.79716	7.73404	SORL1
Negative Regulation Of Peptide Hormone Secretion (GO:0090278)	1/15	0.199446	0.375321	0	0	4.79716	7.73404	IRS1
Negative Regulation Of Platelet Activation (GO:0010544)	1/15	0.199446	0.375321	0	0	4.79716	7.73404	PRKG1
Positive Regulation Of SMAD Protein Signal Transduction (GO:0060391)	1/15	0.199446	0.375321	0	0	4.79716	7.73404	BMP7
Positive Regulation Of Amyloid-Beta Formation (GO:1902004)	1/15	0.199446	0.375321	0	0	4.79716	7.73404	EPHA4
Positive Regulation Of Cyclin-Dependent Protein Serine/Threonine Kinase Activity (GO:0045737)	1/15	0.199446	0.375321	0	0	4.79716	7.73404	PROX1
Positive Regulation Of Glucose Metabolic Process (GO:0010907)	1/15	0.199446	0.375321	0	0	4.79716	7.73404	IRS1
Positive Regulation Of Monocyte Chemotaxis (GO:0090026)	1/15	0.199446	0.375321	0	0	4.79716	7.73404	ANO6
Positive Regulation Of Smooth Muscle Cell Migration (GO:0014911)	1/15	0.199446	0.375321	0	0	4.79716	7.73404	DOCK4
Protein Localization To Endoplasmic Reticulum (GO:0070972)	1/15	0.199446	0.375321	0	0	4.79716	7.73404	RYR2
rRNA Transcription (GO:0009303)	1/15	0.199446	0.375321	0	0	4.79716	7.73404	ZFP36L1
Regulation Of Carbohydrate Metabolic Process (GO:0006109)	1/15	0.199446	0.375321	0	0	4.79716	7.73404	PDK4
Regulation Of Response To External Stimulus (GO:0032101)	3/105	0.201325	0.377997	0	0	1.98054	3.17449	STK24;ALOX5;MGLL
Protein Maturation (GO:0051604)	3/105	0.201325	0.377997	0	0	1.98054	3.17449	ADAM19;MME;SORL1
Metal Ion Transport (GO:0030001)	4/158	0.20408	0.378989	0	0	1.75059	2.78211	RYR2;NIPA1;CACNA1S;KCNK3
Memory (GO:0007613)	2/57	0.204653	0.378989	0	0	2.44584	3.88017	MAPT;ADCY8
Positive Regulation Of Cellular Biosynthetic Process (GO:0031328)	4/159	0.207125	0.378989	0	0	1.7392	2.73824	DDAH1;IRS1;ELOVL5;SOX4
Fatty Acid Catabolic Process (GO:0009062)	2/58	0.210041	0.378989	0	0	2.40203	3.74825	ABHD2;LPIN1
Positive Regulation Of Macroautophagy (GO:0016239)	2/58	0.210041	0.378989	0	0	2.40203	3.74825	SESN3;HTT
Regulation Of Fatty Acid Oxidation (GO:0046320)	1/16	0.211236	0.378989	0	0	4.4771	6.9609	PDK4
Actin Filament Capping (GO:0051693)	1/16	0.211236	0.378989	0	0	4.4771	6.9609	ADD3
Activation Of Adenylate Cyclase Activity (GO:0007190)	1/16	0.211236	0.378989	0	0	4.4771	6.9609	GIPR
Adrenergic Receptor Signaling Pathway (GO:0071875)	1/16	0.211236	0.378989	0	0	4.4771	6.9609	ADRA1B
Amyloid Precursor Protein Metabolic Process (GO:0042982)	1/16	0.211236	0.378989	0	0	4.4771	6.9609	ADAM19
Regulation Of Nervous System Process (GO:0031644)	1/16	0.211236	0.378989	0	0	4.4771	6.9609	TMEM108
Barbed-End Actin Filament Capping (GO:0051016)	1/16	0.211236	0.378989	0	0	4.4771	6.9609	ADD3
Regulation Of Osteoblast Proliferation (GO:0033688)	1/16	0.211236	0.378989	0	0	4.4771	6.9609	NPR3
Cellular Response To Catecholamine Stimulus (GO:0071870)	1/16	0.211236	0.378989	0	0	4.4771	6.9609	RYR2
Regulation Of Stem Cell Proliferation (GO:0072091)	1/16	0.211236	0.378989	0	0	4.4771	6.9609	ZFP36L1
Regulation Of Synaptic Transmission, GABAergic (GO:0032228)	1/16	0.211236	0.378989	0	0	4.4771	6.9609	STXBP1
Regulation Of Synaptic Vesicle Exocytosis (GO:2000300)	1/16	0.211236	0.378989	0	0	4.4771	6.9609	RIMS4
Regulation Of Vascular Endothelial Cell Proliferation (GO:1905562)	1/16	0.211236	0.378989	0	0	4.4771	6.9609	FGFR1
Regulation Of Ventricular Cardiac Muscle Cell Membrane Repolarization (GO:0060307)	1/16	0.211236	0.378989	0	0	4.4771	6.9609	KCNE1
Endothelial Cell Proliferation (GO:0001935)	1/16	0.211236	0.378989	0	0	4.4771	6.9609	BMPER
Establishment Of Melanosome Localization (GO:0032401)	1/16	0.211236	0.378989	0	0	4.4771	6.9609	SHROOM2
Establishment Of Skin Barrier (GO:0061436)	1/16	0.211236	0.378989	0	0	4.4771	6.9609	FGFR1
Sulfur Amino Acid Metabolic Process (GO:0000096)	1/16	0.211236	0.378989	0	0	4.4771	6.9609	MSRA
tRNA Metabolic Process (GO:0006399)	1/16	0.211236	0.378989	0	0	4.4771	6.9609	ZFP36L1
fatty-acyl-CoA Metabolic Process (GO:0035337)	1/16	0.211236	0.378989	0	0	4.4771	6.9609	ACSL3
Intrinsic Apoptotic Signaling Pathway In Response To DNA Damage By P53 Class Mediator (GO:0042771)	1/16	0.211236	0.378989	0	0	4.4771	6.9609	DDIT4
Membrane Depolarization During Cardiac Muscle Cell Action Potential (GO:0086012)	1/16	0.211236	0.378989	0	0	4.4771	6.9609	SLC8A1
Membrane Repolarization (GO:0086009)	1/16	0.211236	0.378989	0	0	4.4771	6.9609	KCNE1
Microtubule Depolymerization (GO:0007019)	1/16	0.211236	0.378989	0	0	4.4771	6.9609	KIF2A
Negative Regulation Of Lipid Catabolic Process (GO:0050995)	1/16	0.211236	0.378989	0	0	4.4771	6.9609	SORL1
Negative Regulation Of Monoatomic Ion Transport (GO:0043271)	1/16	0.211236	0.378989	0	0	4.4771	6.9609	CASQ2
Negative Regulation Of Nervous System Development (GO:0051961)	1/16	0.211236	0.378989	0	0	4.4771	6.9609	SORL1
Negative Regulation Of Vascular Associated Smooth Muscle Cell Proliferation (GO:1904706)	1/16	0.211236	0.378989	0	0	4.4771	6.9609	PRKG1
Neural Tube Development (GO:0021915)	1/16	0.211236	0.378989	0	0	4.4771	6.9609	PROX1
Neuron Maturation (GO:0042551)	1/16	0.211236	0.378989	0	0	4.4771	6.9609	SRRM4
Pharyngeal System Development (GO:0060037)	1/16	0.211236	0.378989	0	0	4.4771	6.9609	BMP7
Positive Regulation Of calcineurin-NFAT Signaling Cascade (GO:0070886)	1/16	0.211236	0.378989	0	0	4.4771	6.9609	LMCD1
Positive Regulation Of Calcineurin-Mediated Signaling (GO:0106058)	1/16	0.211236	0.378989	0	0	4.4771	6.9609	LMCD1
Positive Regulation Of Cation Transmembrane Transport (GO:1904064)	1/16	0.211236	0.378989	0	0	4.4771	6.9609	KCNE1
Protein Autoprocessing (GO:0016540)	1/16	0.211236	0.378989	0	0	4.4771	6.9609	HJV
Regulation Of Brown Fat Cell Differentiation (GO:0090335)	1/16	0.211236	0.378989	0	0	4.4771	6.9609	RREB1
Regulation Of Apoptotic Process (GO:0042981)	12/627	0.214844	0.384822	0	0	1.32115	2.03173	RNF157;TSC22D1;GRK5;GDNF;ANGPT1;TRIM2;HTT;ANO6;ALPK2;ANGPTL4;SLIT2;SOX4
Response To Reactive Oxygen Species (GO:0000302)	2/59	0.215443	0.384822	0	0	2.35975	3.62236	STK24;MAPT
Sulfur Compound Biosynthetic Process (GO:0044272)	2/59	0.215443	0.384822	0	0	2.35975	3.62236	ANGPT1;ST3GAL4
Regulation Of Cytoskeleton Organization (GO:0051493)	3/109	0.21656	0.384822	0	0	1.90537	2.915	DAAM2;ARHGEF19;MAPT
Golgi Organization (GO:0007030)	3/109	0.21656	0.384822	0	0	1.90537	2.915	RAB30;HTT;PRKD1
Positive Regulation Of Epithelial Cell Proliferation (GO:0050679)	3/109	0.21656	0.384822	0	0	1.90537	2.915	PRKD1;PROX1;RREB1
Regulation Of Neurogenesis (GO:0050767)	2/60	0.220857	0.384822	0	0	2.31893	3.50214	MME;SORL1
Positive Regulation Of Cell Cycle (GO:0045787)	2/60	0.220857	0.384822	0	0	2.31893	3.50214	DUSP3;PROX1
Regulation Of Epidermal Cell Differentiation (GO:0045604)	1/17	0.222853	0.384822	0	0	4.19704	6.30078	ZFP36L1
N-glycan Processing (GO:0006491)	1/17	0.222853	0.384822	0	0	4.19704	6.30078	MAN1C1
NADP Metabolic Process (GO:0006739)	1/17	0.222853	0.384822	0	0	4.19704	6.30078	ALDH1L2
Acute Inflammatory Response (GO:0002526)	1/17	0.222853	0.384822	0	0	4.19704	6.30078	ANO6
Regulation Of Oligodendrocyte Differentiation (GO:0048713)	1/17	0.222853	0.384822	0	0	4.19704	6.30078	DAAM2
Regulation Of Phosphatase Activity (GO:0010921)	1/17	0.222853	0.384822	0	0	4.19704	6.30078	HTT
Cardiac Atrium Morphogenesis (GO:0003209)	1/17	0.222853	0.384822	0	0	4.19704	6.30078	PROX1
Cell Migration Involved In Sprouting Angiogenesis (GO:0002042)	1/17	0.222853	0.384822	0	0	4.19704	6.30078	SLIT2
Regulation Of Tubulin Deacetylation (GO:0090043)	1/17	0.222853	0.384822	0	0	4.19704	6.30078	MAPT
Release Of Cytochrome C From Mitochondria (GO:0001836)	1/17	0.222853	0.384822	0	0	4.19704	6.30078	GGCT
snRNA Processing (GO:0016180)	1/17	0.222853	0.384822	0	0	4.19704	6.30078	INTS2
Heart Trabecula Morphogenesis (GO:0061384)	1/17	0.222853	0.384822	0	0	4.19704	6.30078	BMP7
Vesicle Transport Along Actin Filament (GO:0030050)	1/17	0.222853	0.384822	0	0	4.19704	6.30078	MYO1E
Xenobiotic Transport (GO:0042908)	1/17	0.222853	0.384822	0	0	4.19704	6.30078	SLC22A3
Insulin Secretion (GO:0030073)	1/17	0.222853	0.384822	0	0	4.19704	6.30078	RAB11FIP5
Intracellular Sodium Ion Homeostasis (GO:0006883)	1/17	0.222853	0.384822	0	0	4.19704	6.30078	SLC8A1
Leukotriene Metabolic Process (GO:0006691)	1/17	0.222853	0.384822	0	0	4.19704	6.30078	ALOX5
Microglial Cell Activation (GO:0001774)	1/17	0.222853	0.384822	0	0	4.19704	6.30078	MAPT
ncRNA Metabolic Process (GO:0034660)	1/17	0.222853	0.384822	0	0	4.19704	6.30078	MAPT
Negative Regulation Of Amyloid Precursor Protein Catabolic Process (GO:1902992)	1/17	0.222853	0.384822	0	0	4.19704	6.30078	SORL1
Pore Complex Assembly (GO:0046931)	1/17	0.222853	0.384822	0	0	4.19704	6.30078	ANO6
Positive Regulation Of NLRP3 Inflammasome Complex Assembly (GO:1900227)	1/17	0.222853	0.384822	0	0	4.19704	6.30078	PRKD1
Positive Regulation Of Fatty Acid Metabolic Process (GO:0045923)	1/17	0.222853	0.384822	0	0	4.19704	6.30078	ELOVL5
Positive Regulation Of Leukocyte Adhesion To Vascular Endothelial Cell (GO:1904996)	1/17	0.222853	0.384822	0	0	4.19704	6.30078	ST3GAL4
Positive Regulation Of Peptidyl-Lysine Acetylation (GO:2000758)	1/17	0.222853	0.384822	0	0	4.19704	6.30078	SOX4
Pulmonary Valve Morphogenesis (GO:0003184)	1/17	0.222853	0.384822	0	0	4.19704	6.30078	SLIT2
Receptor Recycling (GO:0001881)	1/17	0.222853	0.384822	0	0	4.19704	6.30078	SORL1
Regulation Of B Cell Differentiation (GO:0045577)	1/17	0.222853	0.384822	0	0	4.19704	6.30078	ZFP36L1
Cellular Response To BMP Stimulus (GO:0071773)	2/61	0.226283	0.389931	0	0	2.2795	3.38727	HJV;BMP7
Inorganic Anion Transmembrane Transport (GO:0098661)	2/61	0.226283	0.389931	0	0	2.2795	3.38727	ANO6;ANO4
Regulation Of Small GTPase Mediated Signal Transduction (GO:0051056)	3/112	0.228141	0.392725	0	0	1.85261	2.73777	DOCK3;ARHGEF19;SLIT2
Negative Regulation Of Extrinsic Apoptotic Signaling Pathway (GO:2001237)	2/62	0.231718	0.395515	0	0	2.24138	3.27742	GDNF;HTT
Negative Regulation Of Macromolecule Metabolic Process (GO:0010605)	4/167	0.231936	0.395515	0	0	1.65308	2.41564	REL;MAPT;SH3GL2;MARK1
Regulation Of Fibroblast Growth Factor Receptor Signaling Pathway (GO:0040036)	1/18	0.2343	0.395515	0	0	3.94993	5.73196	SULF2
Cardiac Muscle Cell Contraction (GO:0086003)	1/18	0.2343	0.395515	0	0	3.94993	5.73196	KCNE1
Cyclic Nucleotide Biosynthetic Process (GO:0009190)	1/18	0.2343	0.395515	0	0	3.94993	5.73196	ADCY8
Skin Epidermis Development (GO:0098773)	1/18	0.2343	0.395515	0	0	3.94993	5.73196	FGFR1
Sphingosine Metabolic Process (GO:0006670)	1/18	0.2343	0.395515	0	0	3.94993	5.73196	PLPP3
Inositol Phosphate-Mediated Signaling (GO:0048016)	1/18	0.2343	0.395515	0	0	3.94993	5.73196	INPP5A
Melanosome Localization (GO:0032400)	1/18	0.2343	0.395515	0	0	3.94993	5.73196	SHROOM2
Negative Regulation Of ERBB Signaling Pathway (GO:1901185)	1/18	0.2343	0.395515	0	0	3.94993	5.73196	DUSP3
Negative Regulation Of Antigen Receptor-Mediated Signaling Pathway (GO:0050858)	1/18	0.2343	0.395515	0	0	3.94993	5.73196	DUSP3
Negative Regulation Of Leukocyte Cell-Cell Adhesion (GO:1903038)	1/18	0.2343	0.395515	0	0	3.94993	5.73196	DUSP3
Negative Regulation Of Small GTPase Mediated Signal Transduction (GO:0051058)	1/18	0.2343	0.395515	0	0	3.94993	5.73196	SLIT2
Peptide Catabolic Process (GO:0043171)	1/18	0.2343	0.395515	0	0	3.94993	5.73196	MME
Peripheral Nervous System Development (GO:0007422)	1/18	0.2343	0.395515	0	0	3.94993	5.73196	GDNF
Positive Regulation Of Axon Extension (GO:0045773)	1/18	0.2343	0.395515	0	0	3.94993	5.73196	MAPT
Positive Regulation Of Cholesterol Efflux (GO:0010875)	1/18	0.2343	0.395515	0	0	3.94993	5.73196	EEPD1
Positive Regulation Of Cyclin-Dependent Protein Kinase Activity (GO:1904031)	1/18	0.2343	0.395515	0	0	3.94993	5.73196	PROX1
Positive Regulation Of Embryonic Development (GO:0040019)	1/18	0.2343	0.395515	0	0	3.94993	5.73196	ZBED3
Enzyme-Linked Receptor Protein Signaling Pathway (GO:0007167)	3/114	0.235926	0.397855	0	0	1.81902	2.6271	ROR1;FRK;FGFR1
Cellular Response To Metal Ion (GO:0071248)	3/115	0.239836	0.401458	0	0	1.80268	2.57386	SYT2;ADCY1;ADCY8
Negative Regulation Of Cell Growth (GO:0030308)	3/115	0.239836	0.401458	0	0	1.80268	2.57386	RTN4R;SLIT2;DCBLD2
Modulation Of Chemical Synaptic Transmission (GO:0050804)	3/116	0.243757	0.401458	0	0	1.78662	2.52197	LGI1;RIMS4;TMEM108
RNA Destabilization (GO:0050779)	1/19	0.245578	0.401458	0	0	3.73028	5.23784	LIN28B
Regulation Of Heterotypic Cell-Cell Adhesion (GO:0034114)	1/19	0.245578	0.401458	0	0	3.73028	5.23784	BMP7
Regulation Of Integrin-Mediated Signaling Pathway (GO:2001044)	1/19	0.245578	0.401458	0	0	3.73028	5.23784	PRKD1
Actin Filament-Based Transport (GO:0099515)	1/19	0.245578	0.401458	0	0	3.73028	5.23784	MYO1E
Regulation Of Lipid Catabolic Process (GO:0050994)	1/19	0.245578	0.401458	0	0	3.73028	5.23784	ANGPTL3
Regulation Of Membrane Protein Ectodomain Proteolysis (GO:0051043)	1/19	0.245578	0.401458	0	0	3.73028	5.23784	SH3D19
Regulation Of Mononuclear Cell Migration (GO:0071675)	1/19	0.245578	0.401458	0	0	3.73028	5.23784	SLIT2
Atrioventricular Valve Morphogenesis (GO:0003181)	1/19	0.245578	0.401458	0	0	3.73028	5.23784	SOX4
Calcium-Mediated Signaling Using Intracellular Calcium Source (GO:0035584)	1/19	0.245578	0.401458	0	0	3.73028	5.23784	RYR2
Cellular Response To pH (GO:0071467)	1/19	0.245578	0.401458	0	0	3.73028	5.23784	RAB11FIP5
snRNA 3'-End Processing (GO:0034472)	1/19	0.245578	0.401458	0	0	3.73028	5.23784	INTS2
Hepaticobiliary System Development (GO:0061008)	1/19	0.245578	0.401458	0	0	3.73028	5.23784	PROX1
Long-Chain Fatty Acid Biosynthetic Process (GO:0042759)	1/19	0.245578	0.401458	0	0	3.73028	5.23784	ALOX5
Long-Term Synaptic Potentiation (GO:0060291)	1/19	0.245578	0.401458	0	0	3.73028	5.23784	SLC24A2
Monocarboxylic Acid Catabolic Process (GO:0072329)	1/19	0.245578	0.401458	0	0	3.73028	5.23784	LPIN1
Negative Regulation Of Actin Filament Polymerization (GO:0030837)	1/19	0.245578	0.401458	0	0	3.73028	5.23784	SLIT2
Negative Regulation Of Phosphate Metabolic Process (GO:0045936)	1/19	0.245578	0.401458	0	0	3.73028	5.23784	BMP7
Negative Regulation Of Stem Cell Population Maintenance (GO:1902455)	1/19	0.245578	0.401458	0	0	3.73028	5.23784	TET1
Oligosaccharide Biosynthetic Process (GO:0009312)	1/19	0.245578	0.401458	0	0	3.73028	5.23784	ST3GAL4
Positive Regulation Of Amyloid Precursor Protein Catabolic Process (GO:1902993)	1/19	0.245578	0.401458	0	0	3.73028	5.23784	EPHA4
Positive Regulation Of Blood Coagulation (GO:0030194)	1/19	0.245578	0.401458	0	0	3.73028	5.23784	ST3GAL4
Positive Regulation Of Epithelial Cell Apoptotic Process (GO:1904037)	1/19	0.245578	0.401458	0	0	3.73028	5.23784	ANO6
Positive Regulation Of Heart Contraction (GO:0045823)	1/19	0.245578	0.401458	0	0	3.73028	5.23784	RYR2
Positive Regulation Of Phospholipase Activity (GO:0010518)	1/19	0.245578	0.401458	0	0	3.73028	5.23784	FGFR1
Positive Regulation Of Receptor Internalization (GO:0002092)	1/19	0.245578	0.401458	0	0	3.73028	5.23784	ANGPT1
Pulmonary Valve Development (GO:0003177)	1/19	0.245578	0.401458	0	0	3.73028	5.23784	SLIT2
Regulation Of Anoikis (GO:2000209)	1/19	0.245578	0.401458	0	0	3.73028	5.23784	PDK4
Regulation Of Autophagy Of Mitochondrion (GO:1903146)	1/19	0.245578	0.401458	0	0	3.73028	5.23784	HTT
Peptidyl-Tyrosine Phosphorylation (GO:0018108)	2/65	0.248066	0.404727	0	0	2.13428	2.97532	EPHA4;FGFR1
Protein Autoubiquitination (GO:0051865)	2/65	0.248066	0.404727	0	0	2.13428	2.97532	RNF157;ASB4
Positive Regulation Of Transcription By RNA Polymerase II (GO:0045944)	15/837	0.252193	0.408731	0	0	1.23528	1.70168	BCL11B;ANKRD23;TET1;ESRRG;PROX1;MEIS1;GDNF;HJV;REL;PRKD1;LPIN1;RREB1;TEAD1;SOX4;ZBED3
Regulation Of Heart Contraction (GO:0008016)	2/66	0.253526	0.408731	0	0	2.10081	2.88293	RYR2;SLC8A1
Cell-Cell Junction Assembly (GO:0007043)	2/66	0.253526	0.408731	0	0	2.10081	2.88293	CDH11;EPB41L3
Regulation Of Actin Filament-Based Process (GO:0032970)	2/66	0.253526	0.408731	0	0	2.10081	2.88293	DAAM2;ARHGEF19
Organic Substance Transport (GO:0071702)	4/174	0.254211	0.408731	0	0	1.58437	2.16995	SLC22A3;RYR2;CMTM6;CACNA1S
Regulation Of Cellular Response To Transforming Growth Factor Beta Stimulus (GO:1903844)	1/20	0.256691	0.408731	0	0	3.53375	4.80548	NREP
Regulation Of Chemotaxis (GO:0050920)	1/20	0.256691	0.408731	0	0	3.53375	4.80548	DUSP3
Regulation Of Keratinocyte Differentiation (GO:0045616)	1/20	0.256691	0.408731	0	0	3.53375	4.80548	ZFP36L1
Amyloid Fibril Formation (GO:1990000)	1/20	0.256691	0.408731	0	0	3.53375	4.80548	MAPT
Regulation Of Neural Precursor Cell Proliferation (GO:2000177)	1/20	0.256691	0.408731	0	0	3.53375	4.80548	PROX1
Cellular Response To Steroid Hormone Stimulus (GO:0071383)	1/20	0.256691	0.408731	0	0	3.53375	4.80548	BMP7
Sensory Perception Of Pain (GO:0019233)	1/20	0.256691	0.408731	0	0	3.53375	4.80548	MME
Sodium Ion Homeostasis (GO:0055078)	1/20	0.256691	0.408731	0	0	3.53375	4.80548	SLC8A1
Focal Adhesion Assembly (GO:0048041)	1/20	0.256691	0.408731	0	0	3.53375	4.80548	CDH11
Negative Regulation Of G Protein-Coupled Receptor Signaling Pathway (GO:0045744)	1/20	0.256691	0.408731	0	0	3.53375	4.80548	RPGRIP1L
Negative Regulation Of Axonogenesis (GO:0050771)	1/20	0.256691	0.408731	0	0	3.53375	4.80548	RTN4R
Negative Regulation Of Cell Development (GO:0010721)	1/20	0.256691	0.408731	0	0	3.53375	4.80548	SORL1
Negative Regulation Of Lymphocyte Activation (GO:0051250)	1/20	0.256691	0.408731	0	0	3.53375	4.80548	DUSP3
Negative Regulation Of Microtubule Depolymerization (GO:0007026)	1/20	0.256691	0.408731	0	0	3.53375	4.80548	HDGFL3
Negative Regulation Of Neuron Differentiation (GO:0045665)	1/20	0.256691	0.408731	0	0	3.53375	4.80548	BMP7
Phosphatidylserine Metabolic Process (GO:0006658)	1/20	0.256691	0.408731	0	0	3.53375	4.80548	OSBPL10
Positive Regulation Of Cilium Assembly (GO:0045724)	1/20	0.256691	0.408731	0	0	3.53375	4.80548	HTT
Positive Regulation Of Oxidoreductase Activity (GO:0051353)	1/20	0.256691	0.408731	0	0	3.53375	4.80548	GDNF
Positive Regulation Of Protein Autophosphorylation (GO:0031954)	1/20	0.256691	0.408731	0	0	3.53375	4.80548	PDGFC
Regulation Of Cardiac Muscle Cell Membrane Repolarization (GO:0099623)	1/20	0.256691	0.408731	0	0	3.53375	4.80548	KCNE1
Phosphorylation (GO:0016310)	8/410	0.257994	0.410411	0	0	1.34293	1.81943	EPHA4;GRK5;STK24;PDK4;EPHB1;PRKG1;MARK1;FGFR1
Embryonic Organ Development (GO:0048568)	2/67	0.258988	0.411202	0	0	2.06838	2.79432	GDNF;TEAD1
Positive Regulation Of Cell-Substrate Adhesion (GO:0010811)	2/67	0.258988	0.411202	0	0	2.06838	2.79432	NDNF;RREB1
Negative Regulation Of Cellular Component Organization (GO:0051129)	2/68	0.264451	0.416163	0	0	2.03692	2.7093	PRKD1;SORL1
Negative Regulation Of Neuron Apoptotic Process (GO:0043524)	2/68	0.264451	0.416163	0	0	2.03692	2.7093	GDNF;NDNF
Negative Regulation Of Supramolecular Fiber Organization (GO:1902904)	2/68	0.264451	0.416163	0	0	2.03692	2.7093	SLIT2;HDGFL3
Positive Regulation Of Growth (GO:0045927)	2/68	0.264451	0.416163	0	0	2.03692	2.7093	LGI1;TEAD1
Protein Localization To Organelle (GO:0033365)	3/122	0.267482	0.416163	0	0	1.69596	2.23647	PACSIN2;BMP7;SORL1
Carbohydrate Biosynthetic Process (GO:0016051)	1/21	0.267641	0.416163	0	0	3.35687	4.42472	ST3GAL4
Regulation Of Proteolysis Involved In Protein Catabolic Process (GO:1903050)	1/21	0.267641	0.416163	0	0	3.35687	4.42472	EPHA4
snRNA Metabolic Process (GO:0016073)	1/21	0.267641	0.416163	0	0	3.35687	4.42472	INTS2
Fatty Acid Derivative Biosynthetic Process (GO:1901570)	1/21	0.267641	0.416163	0	0	3.35687	4.42472	ALOX5
Long-Chain Fatty Acid Transport (GO:0015909)	1/21	0.267641	0.416163	0	0	3.35687	4.42472	ACSL3
Membrane Protein Ectodomain Proteolysis (GO:0006509)	1/21	0.267641	0.416163	0	0	3.35687	4.42472	ADAM19
Negative Regulation Of Extrinsic Apoptotic Signaling Pathway In Absence Of Ligand (GO:2001240)	1/21	0.267641	0.416163	0	0	3.35687	4.42472	GDNF
Negative Regulation Of Macroautophagy (GO:0016242)	1/21	0.267641	0.416163	0	0	3.35687	4.42472	FEZ2
Negative Regulation Of Signal Transduction In Absence Of Ligand (GO:1901099)	1/21	0.267641	0.416163	0	0	3.35687	4.42472	GDNF
Positive Regulation Of Cell-Substrate Junction Organization (GO:0150117)	1/21	0.267641	0.416163	0	0	3.35687	4.42472	DUSP3
Positive Regulation Of Glucose Import (GO:0046326)	1/21	0.267641	0.416163	0	0	3.35687	4.42472	IRS1
Positive Regulation Of Peptidyl-Threonine Phosphorylation (GO:0010800)	1/21	0.267641	0.416163	0	0	3.35687	4.42472	BMP7
Positive Regulation Of Striated Muscle Cell Differentiation (GO:0051155)	1/21	0.267641	0.416163	0	0	3.35687	4.42472	PROX1
Regulation Of B Cell Activation (GO:0050864)	1/21	0.267641	0.416163	0	0	3.35687	4.42472	ZFP36L1
Regulation Of SMAD Protein Signal Transduction (GO:0060390)	1/21	0.267641	0.416163	0	0	3.35687	4.42472	BMP7
Regulation Of Cardiac Muscle Hypertrophy (GO:0010611)	1/21	0.267641	0.416163	0	0	3.35687	4.42472	LMCD1
Regulation Of Cell-Substrate Junction Assembly (GO:0090109)	1/21	0.267641	0.416163	0	0	3.35687	4.42472	DUSP3
Cellular Response To Organic Substance (GO:0071310)	2/69	0.269915	0.419306	0	0	2.0064	2.62768	MME;SLIT2
Protein Phosphorylation (GO:0006468)	9/478	0.272602	0.423082	0	0	1.29501	1.68318	EPHA4;GRK5;STK24;PDK4;PRKD1;EPHB1;PRKG1;MARK1;FGFR1
Positive Regulation Of Protein Secretion (GO:0050714)	2/70	0.275378	0.423787	0	0	1.97679	2.54928	MYRIP;SOX4
ERK1 And ERK2 Cascade (GO:0070371)	1/22	0.27843	0.423787	0	0	3.19684	4.08744	ZFP36L1
Regulation Of Glycogen Biosynthetic Process (GO:0005979)	1/22	0.27843	0.423787	0	0	3.19684	4.08744	IRS1
Regulation Of Neutrophil Chemotaxis (GO:0090022)	1/22	0.27843	0.423787	0	0	3.19684	4.08744	SLIT2
Blood Vessel Endothelial Cell Migration (GO:0043534)	1/22	0.27843	0.423787	0	0	3.19684	4.08744	SLIT2
Regulation Of Platelet Aggregation (GO:0090330)	1/22	0.27843	0.423787	0	0	3.19684	4.08744	PRKG1
Regulation Of Reactive Oxygen Species Biosynthetic Process (GO:1903426)	1/22	0.27843	0.423787	0	0	3.19684	4.08744	ALOX5
Cell Morphogenesis Involved In Differentiation (GO:0000904)	1/22	0.27843	0.423787	0	0	3.19684	4.08744	PROX1
Cell-Cell Signaling By Wnt (GO:0198738)	1/22	0.27843	0.423787	0	0	3.19684	4.08744	GPC4
Regulation Of Supramolecular Fiber Organization (GO:1902903)	1/22	0.27843	0.423787	0	0	3.19684	4.08744	MAPT
Response To Purine-Containing Compound (GO:0014074)	1/22	0.27843	0.423787	0	0	3.19684	4.08744	RYR2
Vesicle Transport Along Microtubule (GO:0047496)	1/22	0.27843	0.423787	0	0	3.19684	4.08744	HTT
Negative Regulation Of TORC1 Signaling (GO:1904262)	1/22	0.27843	0.423787	0	0	3.19684	4.08744	SESN3
Negative Regulation Of Endothelial Cell Apoptotic Process (GO:2000352)	1/22	0.27843	0.423787	0	0	3.19684	4.08744	NDNF
Negative Regulation Of Epidermal Growth Factor Receptor Signaling Pathway (GO:0042059)	1/22	0.27843	0.423787	0	0	3.19684	4.08744	DUSP3
Negative Regulation Of Protein Localization To Membrane (GO:1905476)	1/22	0.27843	0.423787	0	0	3.19684	4.08744	KCNE1
Negative Regulation Of Proteolysis Involved In Protein Catabolic Process (GO:1903051)	1/22	0.27843	0.423787	0	0	3.19684	4.08744	EPHA4
Photoperiodism (GO:0009648)	1/22	0.27843	0.423787	0	0	3.19684	4.08744	CLOCK
Positive Regulation Of Adenylate Cyclase Activity (GO:0045762)	1/22	0.27843	0.423787	0	0	3.19684	4.08744	GIPR
Positive Regulation Of Morphogenesis Of An Epithelium (GO:1905332)	1/22	0.27843	0.423787	0	0	3.19684	4.08744	GDNF
Regulation Of Axon Extension Involved In Axon Guidance (GO:0048841)	1/22	0.27843	0.423787	0	0	3.19684	4.08744	SEMA3A
Golgi Vesicle Transport (GO:0048193)	4/182	0.280173	0.426049	0	0	1.51247	1.92439	HTT;PRKD1;PLPP3;SORL1
Protein Localization To Plasma Membrane (GO:0072659)	3/126	0.283447	0.429453	0	0	1.64043	2.06814	STXBP1;EPB41L3;TTC7B
Inflammatory Response (GO:0006954)	4/183	0.283449	0.429453	0	0	1.50394	1.89605	REL;ADCY1;ADCY8;MGLL
Protein Stabilization (GO:0050821)	4/183	0.283449	0.429453	0	0	1.50394	1.89605	EPHA4;PLPP3;SOX4;ZBED3
Regulation Of MAPK Cascade (GO:0043408)	4/183	0.283449	0.429453	0	0	1.50394	1.89605	DUSP3;ADRA1B;EPHB1;FGFR1
Regulation Of mRNA Stability (GO:0043488)	2/72	0.286297	0.430473	0	0	1.92009	2.4015	GDNF;ZFP36L1
Monoatomic Cation Homeostasis (GO:0055080)	2/72	0.286297	0.430473	0	0	1.92009	2.4015	HJV;SLC8A1
Negative Regulation Of Wnt Signaling Pathway (GO:0030178)	3/127	0.287452	0.430473	0	0	1.62711	2.02852	TMEM88B;CXXC4;SHISA6
Regulation Of Myeloid Cell Differentiation (GO:0045637)	1/23	0.289061	0.430473	0	0	3.05135	3.78708	MEIS1
Artery Development (GO:0060840)	1/23	0.289061	0.430473	0	0	3.05135	3.78708	ANGPTL3
Regulation Of Nuclear-Transcribed mRNA Catabolic Process, Deadenylation-Dependent Decay (GO:1900151)	1/23	0.289061	0.430473	0	0	3.05135	3.78708	ZFP36L1
Regulation Of Ryanodine-Sensitive Calcium-Release Channel Activity (GO:0060314)	1/23	0.289061	0.430473	0	0	3.05135	3.78708	CASQ2
Cellular Response To Hexose Stimulus (GO:0071331)	1/23	0.289061	0.430473	0	0	3.05135	3.78708	SOX4
Respiratory Tube Development (GO:0030323)	1/23	0.289061	0.430473	0	0	3.05135	3.78708	PROX1
Response To Hexose (GO:0009746)	1/23	0.289061	0.430473	0	0	3.05135	3.78708	ZBED3
Negative Regulation Of NIK/NF-kappaB Signaling (GO:1901223)	1/23	0.289061	0.430473	0	0	3.05135	3.78708	BMP7
Negative Regulation Of Intracellular Protein Transport (GO:0090317)	1/23	0.289061	0.430473	0	0	3.05135	3.78708	KCNE1
Negative Regulation Of Ion Transmembrane Transporter Activity (GO:0032413)	1/23	0.289061	0.430473	0	0	3.05135	3.78708	CASQ2
Negative Regulation Of Protein Depolymerization (GO:1901880)	1/23	0.289061	0.430473	0	0	3.05135	3.78708	HDGFL3
Positive Regulation Of Lipid Metabolic Process (GO:0045834)	1/23	0.289061	0.430473	0	0	3.05135	3.78708	ANGPTL3
Positive Regulation Of Nitric Oxide Biosynthetic Process (GO:0045429)	1/23	0.289061	0.430473	0	0	3.05135	3.78708	DDAH1
Positive Regulation Of Vascular Endothelial Growth Factor Production (GO:0010575)	1/23	0.289061	0.430473	0	0	3.05135	3.78708	SULF2
Protein N-linked Glycosylation Via Asparagine (GO:0018279)	1/23	0.289061	0.430473	0	0	3.05135	3.78708	ST6GAL1
Regulation Of Cell Size (GO:0008361)	1/23	0.289061	0.430473	0	0	3.05135	3.78708	RAP1GAP2
Positive Regulation Of Signal Transduction (GO:0009967)	5/244	0.290583	0.432145	0	0	1.40857	1.7408	IRS1;TMEM108;HTT;SORL1;SULF2
Activation Of Protein Kinase Activity (GO:0032147)	2/73	0.29175	0.432145	0	0	1.89294	2.33183	ANGPT1;ADCY8
Chloride Transport (GO:0006821)	2/73	0.29175	0.432145	0	0	1.89294	2.33183	ANO6;ANO4
Glycoprotein Biosynthetic Process (GO:0009101)	2/73	0.29175	0.432145	0	0	1.89294	2.33183	ST3GAL4;GAL3ST3
Lymphocyte Differentiation (GO:0030098)	2/73	0.29175	0.432145	0	0	1.89294	2.33183	NFIL3;SOX4
Negative Regulation Of Transforming Growth Factor Beta Receptor Signaling Pathway (GO:0030512)	2/73	0.29175	0.432145	0	0	1.89294	2.33183	FBN2;TET1
Negative Regulation Of Apoptotic Process (GO:0043066)	8/427	0.293797	0.434788	0	0	1.28717	1.57662	RNF157;TSC22D1;GRK5;GDNF;ANGPT1;PDK4;NDNF;ANGPTL4
Cellular Response To Lipid (GO:0071396)	4/187	0.296609	0.436264	0	0	1.47073	1.78743	IRS1;PDK4;ADCY1;ADCY8
Calcium-Mediated Signaling (GO:0019722)	2/74	0.297198	0.436264	0	0	1.86654	2.26478	RYR2;SLC8A1
Wound Healing (GO:0042060)	2/74	0.297198	0.436264	0	0	1.86654	2.26478	PLPP3;DCBLD2
L-amino Acid Transport (GO:0015807)	1/24	0.299536	0.436264	0	0	2.91852	3.51833	SLC6A17
Regulation Of Insulin Secretion Involved In Cellular Response To Glucose Stimulus (GO:0061178)	1/24	0.299536	0.436264	0	0	2.91852	3.51833	ADCY8
Regulation Of Microtubule Depolymerization (GO:0031114)	1/24	0.299536	0.436264	0	0	2.91852	3.51833	HDGFL3
Regulation Of Mitochondrial Fission (GO:0090140)	1/24	0.299536	0.436264	0	0	2.91852	3.51833	MAPT
Regulation Of Vascular Endothelial Growth Factor Production (GO:0010574)	1/24	0.299536	0.436264	0	0	2.91852	3.51833	SULF2
Dendritic Spine Organization (GO:0097061)	1/24	0.299536	0.436264	0	0	2.91852	3.51833	EPHB1
Stress Granule Assembly (GO:0034063)	1/24	0.299536	0.436264	0	0	2.91852	3.51833	MAPT
Ventricular Cardiac Muscle Tissue Development (GO:0003229)	1/24	0.299536	0.436264	0	0	2.91852	3.51833	PROX1
Iron Ion Transport (GO:0006826)	1/24	0.299536	0.436264	0	0	2.91852	3.51833	CP
Modified Amino Acid Transport (GO:0072337)	1/24	0.299536	0.436264	0	0	2.91852	3.51833	SLC16A9
Natural Killer Cell Activation (GO:0030101)	1/24	0.299536	0.436264	0	0	2.91852	3.51833	NFIL3
Positive Regulation Of Endopeptidase Activity (GO:0010950)	1/24	0.299536	0.436264	0	0	2.91852	3.51833	EPHA4
Positive Regulation Of Nitric Oxide Metabolic Process (GO:1904407)	1/24	0.299536	0.436264	0	0	2.91852	3.51833	DDAH1
Protein Kinase B Signaling (GO:0043491)	1/24	0.299536	0.436264	0	0	2.91852	3.51833	ZFP36L1
Protein Targeting To Lysosome (GO:0006622)	1/24	0.299536	0.436264	0	0	2.91852	3.51833	SORL1
Regulation Of Cyclin-Dependent Protein Serine/Threonine Kinase Activity (GO:0000079)	2/75	0.30264	0.439624	0	0	1.84086	2.20022	PROX1;CCNJL
Regulation Of Epithelial To Mesenchymal Transition (GO:0010717)	2/75	0.30264	0.439624	0	0	1.84086	2.20022	EPHA4;MARK1
Cellular Response To Nutrient Levels (GO:0031669)	2/75	0.30264	0.439624	0	0	1.84086	2.20022	STK24;PDK4
Negative Regulation Of Protein Metabolic Process (GO:0051248)	3/131	0.303511	0.440503	0	0	1.5759	1.87901	EPHA4;TRIM2;IGF2BP2
Protein Localization To Cell Periphery (GO:1990778)	3/132	0.307533	0.443495	0	0	1.5636	1.84375	STXBP1;EPB41L3;TTC7B
DNA Geometric Change (GO:0032392)	1/25	0.309857	0.443495	0	0	2.79676	3.2768	HMGB3
Regulation Of Plasma Membrane Bounded Cell Projection Organization (GO:0120035)	1/25	0.309857	0.443495	0	0	2.79676	3.2768	MARK1
Regulation Of Postsynapse Organization (GO:0099175)	1/25	0.309857	0.443495	0	0	2.79676	3.2768	EPHA4
Cell Surface Receptor Signaling Pathway Involved In Cell-Cell Signaling (GO:1905114)	1/25	0.309857	0.443495	0	0	2.79676	3.2768	GPC4
Cell-Cell Adhesion Mediated By Cadherin (GO:0044331)	1/25	0.309857	0.443495	0	0	2.79676	3.2768	CDH11
Regulation Of Synapse Organization (GO:0050807)	1/25	0.309857	0.443495	0	0	2.79676	3.2768	EPHA4
Vascular Endothelial Growth Factor Receptor Signaling Pathway (GO:0048010)	1/25	0.309857	0.443495	0	0	2.79676	3.2768	PRKD1
Lamellipodium Assembly (GO:0030032)	1/25	0.309857	0.443495	0	0	2.79676	3.2768	PARVB
Negative Regulation Of Cation Channel Activity (GO:2001258)	1/25	0.309857	0.443495	0	0	2.79676	3.2768	CASQ2
Negative Regulation Of Neurogenesis (GO:0050768)	1/25	0.309857	0.443495	0	0	2.79676	3.2768	SORL1
Negative Regulation Of Protein Polymerization (GO:0032272)	1/25	0.309857	0.443495	0	0	2.79676	3.2768	SLIT2
Negative Regulation Of Wound Healing (GO:0061045)	1/25	0.309857	0.443495	0	0	2.79676	3.2768	ALOX5
Positive Regulation Of Microtubule Polymerization Or Depolymerization (GO:0031112)	1/25	0.309857	0.443495	0	0	2.79676	3.2768	MAPT
Regulation Of DNA Damage Response, Signal Transduction By P53 Class Mediator (GO:0043516)	1/25	0.309857	0.443495	0	0	2.79676	3.2768	SOX4
Regulation Of Catecholamine Secretion (GO:0050433)	1/25	0.309857	0.443495	0	0	2.79676	3.2768	SYT2
Regulation Of Cell Adhesion (GO:0030155)	3/133	0.311558	0.445543	0	0	1.55148	1.80929	EPHA4;ANGPT1;PLXNA4
Regulation Of Translation (GO:0006417)	4/192	0.313161	0.447451	0	0	1.4312	1.66168	EPHA4;TRIM2;IGF2BP2;SOX4
Negative Regulation Of Angiogenesis (GO:0016525)	2/78	0.318917	0.45065	0	0	1.7679	2.02039	ALOX5;ADAMTS9
Positive Regulation Of NF-kappaB Transcription Factor Activity (GO:0051092)	3/135	0.31961	0.45065	0	0	1.5278	1.74269	ROR1;PRKD1;CLOCK
Regulation Of Neuron Migration (GO:2001222)	1/26	0.320027	0.45065	0	0	2.68473	3.05885	SEMA3A
Carbohydrate Derivative Biosynthetic Process (GO:1901137)	1/26	0.320027	0.45065	0	0	2.68473	3.05885	ST3GAL4
Cell-Substrate Junction Assembly (GO:0007044)	1/26	0.320027	0.45065	0	0	2.68473	3.05885	CDH11
Cellular Response To Osmotic Stress (GO:0071470)	1/26	0.320027	0.45065	0	0	2.68473	3.05885	ZFP36L1
Response To Alcohol (GO:0097305)	1/26	0.320027	0.45065	0	0	2.68473	3.05885	SLIT2
Cortical Cytoskeleton Organization (GO:0030865)	1/26	0.320027	0.45065	0	0	2.68473	3.05885	EPB41L3
Negative Regulation Of Cytoskeleton Organization (GO:0051494)	1/26	0.320027	0.45065	0	0	2.68473	3.05885	SLIT2
Negative Regulation Of Insulin Receptor Signaling Pathway (GO:0046627)	1/26	0.320027	0.45065	0	0	2.68473	3.05885	IRS1
Negative Regulation Of Plasma Membrane Bounded Cell Projection Assembly (GO:0120033)	1/26	0.320027	0.45065	0	0	2.68473	3.05885	SLIT2
Positive Regulation Of Cell Development (GO:0010720)	1/26	0.320027	0.45065	0	0	2.68473	3.05885	MME
Positive Regulation Of Cholesterol Transport (GO:0032376)	1/26	0.320027	0.45065	0	0	2.68473	3.05885	EEPD1
Positive Regulation Of Glucose Transmembrane Transport (GO:0010828)	1/26	0.320027	0.45065	0	0	2.68473	3.05885	IRS1
Positive Regulation Of Mitotic Cell Cycle (GO:0045931)	1/26	0.320027	0.45065	0	0	2.68473	3.05885	DUSP3
Positive Regulation Of Mononuclear Cell Migration (GO:0071677)	1/26	0.320027	0.45065	0	0	2.68473	3.05885	ANO6
Regulation Of Cardiac Muscle Cell Contraction (GO:0086004)	1/26	0.320027	0.45065	0	0	2.68473	3.05885	RYR2
Regulation Of Defense Response (GO:0031347)	2/79	0.324324	0.452824	0	0	1.74484	1.96471	ALOX5;MGLL
Regulation Of Vesicle-Mediated Transport (GO:0060627)	2/79	0.324324	0.452824	0	0	1.74484	1.96471	PACSIN2;STON2
Exocytosis (GO:0006887)	2/79	0.324324	0.452824	0	0	1.74484	1.96471	RAB31;RAB11FIP5
Vascular Transport (GO:0010232)	2/79	0.324324	0.452824	0	0	1.74484	1.96471	SLC22A3;SLC6A17
Positive Regulation Of GTPase Activity (GO:0043547)	4/196	0.326465	0.452824	0	0	1.40106	1.5684	RTN4R;RAP1GAP2;ARHGEF19;RGS6
Sensory Perception Of Mechanical Stimulus (GO:0050954)	2/80	0.32972	0.452824	0	0	1.72237	1.91099	KCNE1;ROR1
Transport Across Blood-Brain Barrier (GO:0150104)	2/80	0.32972	0.452824	0	0	1.72237	1.91099	SLC22A3;SLC6A17
Positive Regulation Of Amide Metabolic Process (GO:0034250)	2/80	0.32972	0.452824	0	0	1.72237	1.91099	EPHA4;SOX4
Positive Regulation Of Cell Motility (GO:2000147)	4/197	0.329797	0.452824	0	0	1.39372	1.54603	EPHA4;DAAM2;PDGFC;ANGPTL3
Regulation Of Cholesterol Efflux (GO:0010874)	1/27	0.330047	0.452824	0	0	2.58133	2.86145	EEPD1
Golgi To Plasma Membrane Protein Transport (GO:0043001)	1/27	0.330047	0.452824	0	0	2.58133	2.86145	RAB31
RNA Phosphodiester Bond Hydrolysis (GO:0090501)	1/27	0.330047	0.452824	0	0	2.58133	2.86145	ZC3H12C
Regulation Of Lipid Biosynthetic Process (GO:0046890)	1/27	0.330047	0.452824	0	0	2.58133	2.86145	PDK4
Regulation Of Microtubule Polymerization Or Depolymerization (GO:0031110)	1/27	0.330047	0.452824	0	0	2.58133	2.86145	MAPT
Artery Morphogenesis (GO:0048844)	1/27	0.330047	0.452824	0	0	2.58133	2.86145	ANGPTL3
Carboxylic Acid Metabolic Process (GO:0019752)	1/27	0.330047	0.452824	0	0	2.58133	2.86145	ST6GAL1
Regulation Of Protein Targeting To Membrane (GO:0090313)	1/27	0.330047	0.452824	0	0	2.58133	2.86145	KCNE1
Regulation Of Sodium Ion Transmembrane Transport (GO:1902305)	1/27	0.330047	0.452824	0	0	2.58133	2.86145	FXYD6
Regulation Of Striated Muscle Contraction (GO:0006942)	1/27	0.330047	0.452824	0	0	2.58133	2.86145	RYR2
Chondrocyte Differentiation (GO:0002062)	1/27	0.330047	0.452824	0	0	2.58133	2.86145	SULF2
Transcription By RNA Polymerase III (GO:0006383)	1/27	0.330047	0.452824	0	0	2.58133	2.86145	ZFP36L1
Negative Regulation Of DNA Biosynthetic Process (GO:2000279)	1/27	0.330047	0.452824	0	0	2.58133	2.86145	DACH1
Negative Regulation Of Calcium Ion Transmembrane Transporter Activity (GO:1901020)	1/27	0.330047	0.452824	0	0	2.58133	2.86145	CASQ2
Negative Regulation Of Cellular Response To Insulin Stimulus (GO:1900077)	1/27	0.330047	0.452824	0	0	2.58133	2.86145	IRS1
Negative Regulation Of Intracellular Steroid Hormone Receptor Signaling Pathway (GO:0033144)	1/27	0.330047	0.452824	0	0	2.58133	2.86145	CLOCK
Peptidyl-Tyrosine Dephosphorylation (GO:0035335)	1/27	0.330047	0.452824	0	0	2.58133	2.86145	DUSP3
Positive Regulation Of Fibroblast Proliferation (GO:0048146)	1/27	0.330047	0.452824	0	0	2.58133	2.86145	PDGFC
Positive Regulation Of Neural Precursor Cell Proliferation (GO:2000179)	1/27	0.330047	0.452824	0	0	2.58133	2.86145	PROX1
Positive Regulation Of Proteolysis Involved In Protein Catabolic Process (GO:1903052)	1/27	0.330047	0.452824	0	0	2.58133	2.86145	L3MBTL3
Protein Localization To Golgi Apparatus (GO:0034067)	1/27	0.330047	0.452824	0	0	2.58133	2.86145	SORL1
Regulation Of NLRP3 Inflammasome Complex Assembly (GO:1900225)	1/27	0.330047	0.452824	0	0	2.58133	2.86145	PRKD1
Regulation Of Protein Localization (GO:0032880)	2/81	0.335103	0.458768	0	0	1.70047	1.85915	MAPT;RAB11FIP5
Positive Regulation Of Protein Kinase B Signaling (GO:0051897)	2/81	0.335103	0.458768	0	0	1.70047	1.85915	ANGPT1;FGFR1
RNA Biosynthetic Process (GO:0032774)	1/28	0.33992	0.458768	0	0	2.48558	2.68205	ZFP36L1
Alpha-Amino Acid Metabolic Process (GO:1901605)	1/28	0.33992	0.458768	0	0	2.48558	2.68205	DDAH1
Regulation Of Muscle Contraction (GO:0006937)	1/28	0.33992	0.458768	0	0	2.48558	2.68205	CACNA1S
Respiratory System Development (GO:0060541)	1/28	0.33992	0.458768	0	0	2.48558	2.68205	PROX1
Response To Steroid Hormone (GO:0048545)	1/28	0.33992	0.458768	0	0	2.48558	2.68205	ABHD2
Embryonic Skeletal System Development (GO:0048706)	1/28	0.33992	0.458768	0	0	2.48558	2.68205	SULF2
Establishment Of Mitotic Spindle Orientation (GO:0000132)	1/28	0.33992	0.458768	0	0	2.48558	2.68205	HTT
Glutamine Family Amino Acid Metabolic Process (GO:0009064)	1/28	0.33992	0.458768	0	0	2.48558	2.68205	DDAH1
Glycolipid Metabolic Process (GO:0006664)	1/28	0.33992	0.458768	0	0	2.48558	2.68205	ST3GAL4
Negative Regulation Of Cell Cycle Process (GO:0010948)	1/28	0.33992	0.458768	0	0	2.48558	2.68205	BMP7
Negative Regulation Of Developmental Growth (GO:0048640)	1/28	0.33992	0.458768	0	0	2.48558	2.68205	RTN4R
Positive Regulation Of Microtubule Polymerization (GO:0031116)	1/28	0.33992	0.458768	0	0	2.48558	2.68205	MAPT
Positive Regulation Of Release Of Sequestered Calcium Ion Into Cytosol (GO:0051281)	1/28	0.33992	0.458768	0	0	2.48558	2.68205	HTT
Positive Regulation Of Synapse Assembly (GO:0051965)	1/28	0.33992	0.458768	0	0	2.48558	2.68205	EPHB1
Protein Depolymerization (GO:0051261)	1/28	0.33992	0.458768	0	0	2.48558	2.68205	KIF2A
Regulation Of Blood Coagulation (GO:0030193)	1/28	0.33992	0.458768	0	0	2.48558	2.68205	ST3GAL4
Regulation Of Cardiac Muscle Cell Action Potential (GO:0098901)	1/28	0.33992	0.458768	0	0	2.48558	2.68205	RYR2
Regulation Of Cell Morphogenesis (GO:0022604)	1/28	0.33992	0.458768	0	0	2.48558	2.68205	SH3D19
Monocarboxylic Acid Metabolic Process (GO:0032787)	2/82	0.340475	0.459142	0	0	1.67912	1.80911	ANGPTL3;ACSL3
Activation Of GTPase Activity (GO:0090630)	2/83	0.345832	0.465608	0	0	1.65829	1.76078	RAP1GAP2;ARHGEF19
Sensory Perception Of Sound (GO:0007605)	2/83	0.345832	0.465608	0	0	1.65829	1.76078	KCNE1;ROR1
Regulation Of Dendritic Spine Morphogenesis (GO:0061001)	1/29	0.349649	0.465823	0	0	2.39667	2.51849	EPHA4
Regulation Of Protein Autophosphorylation (GO:0031952)	1/29	0.349649	0.465823	0	0	2.39667	2.51849	PDGFC
Response To Peptide (GO:1901652)	1/29	0.349649	0.465823	0	0	2.39667	2.51849	IRS1
Very Long-Chain Fatty Acid Metabolic Process (GO:0000038)	1/29	0.349649	0.465823	0	0	2.39667	2.51849	ELOVL5
Intrinsic Apoptotic Signaling Pathway By P53 Class Mediator (GO:0072332)	1/29	0.349649	0.465823	0	0	2.39667	2.51849	DDIT4
Liver Development (GO:0001889)	1/29	0.349649	0.465823	0	0	2.39667	2.51849	PROX1
Lung Development (GO:0030324)	1/29	0.349649	0.465823	0	0	2.39667	2.51849	PROX1
Macrophage Activation (GO:0042116)	1/29	0.349649	0.465823	0	0	2.39667	2.51849	MAPT
Modulation Of Excitatory Postsynaptic Potential (GO:0098815)	1/29	0.349649	0.465823	0	0	2.39667	2.51849	TMEM108
Phosphatidic Acid Biosynthetic Process (GO:0006654)	1/29	0.349649	0.465823	0	0	2.39667	2.51849	PNPLA3
Positive Regulation Of Rho Protein Signal Transduction (GO:0035025)	1/29	0.349649	0.465823	0	0	2.39667	2.51849	RTN4R
Positive Regulation Of Small Molecule Metabolic Process (GO:0062013)	1/29	0.349649	0.465823	0	0	2.39667	2.51849	IRS1
Regulation Of T Cell Receptor Signaling Pathway (GO:0050856)	1/29	0.349649	0.465823	0	0	2.39667	2.51849	DUSP3
Protein Localization (GO:0008104)	6/328	0.353083	0.47002	0	0	1.25345	1.30491	RAB31;ANGPT1;STXBP1;MGAT3;SHROOM2;PHYHIP
Regulation Of Nucleic Acid-Templated Transcription (GO:1903506)	6/329	0.355699	0.471388	0	0	1.2495	1.29157	NFIL3;GTF2IRD1;ESRRG;CLOCK;RREB1;SOX4
Regulation Of Cell Growth (GO:0001558)	4/205	0.356501	0.471388	0	0	1.33764	1.37966	LGI1;SLIT2;TEAD1;DCBLD2
Cellular Response To Hormone Stimulus (GO:0032870)	2/85	0.356504	0.471388	0	0	1.61815	1.66898	SLIT2;ZFP36L1
rRNA Metabolic Process (GO:0016072)	2/85	0.356504	0.471388	0	0	1.61815	1.66898	MAPT;ZFP36L1
ATP Metabolic Process (GO:0046034)	1/30	0.359234	0.471388	0	0	2.3139	2.36892	OLA1
DNA Damage Checkpoint Signaling (GO:0000077)	1/30	0.359234	0.471388	0	0	2.3139	2.36892	CLOCK
NIK/NF-kappaB Signaling (GO:0038061)	1/30	0.359234	0.471388	0	0	2.3139	2.36892	REL
Regulation Of Protein Localization To Cell Surface (GO:2000008)	1/30	0.359234	0.471388	0	0	2.3139	2.36892	RAB11FIP5
Cardiac Muscle Tissue Morphogenesis (GO:0055008)	1/30	0.359234	0.471388	0	0	2.3139	2.36892	PROX1
Cellular Response To Vascular Endothelial Growth Factor Stimulus (GO:0035924)	1/30	0.359234	0.471388	0	0	2.3139	2.36892	PRKD1
Skeletal Muscle Organ Development (GO:0060538)	1/30	0.359234	0.471388	0	0	2.3139	2.36892	IGSF8
Lamellipodium Organization (GO:0097581)	1/30	0.359234	0.471388	0	0	2.3139	2.36892	PARVB
ncRNA Catabolic Process (GO:0034661)	1/30	0.359234	0.471388	0	0	2.3139	2.36892	LIN28B
Negative Regulation Of Endocytosis (GO:0045806)	1/30	0.359234	0.471388	0	0	2.3139	2.36892	PRKD1
Phospholipid Dephosphorylation (GO:0046839)	1/30	0.359234	0.471388	0	0	2.3139	2.36892	PLPP3
Platelet Aggregation (GO:0070527)	1/30	0.359234	0.471388	0	0	2.3139	2.36892	STXBP1
Positive Regulation Of Carbohydrate Metabolic Process (GO:0045913)	1/30	0.359234	0.471388	0	0	2.3139	2.36892	IRS1
Regulation Of calcineurin-NFAT Signaling Cascade (GO:0070884)	1/30	0.359234	0.471388	0	0	2.3139	2.36892	LMCD1
Negative Regulation Of Intracellular Signal Transduction (GO:1902532)	4/207	0.363181	0.47619	0	0	1.32431	1.34133	DUSP3;DDIT4;SLIT2;BMP7
Positive Regulation Of I-kappaB kinase/NF-kappaB Signaling (GO:0043123)	3/147	0.367861	0.476978	0	0	1.39952	1.39959	REL;ROR1;PRKD1
Regulation Of Glucose Import (GO:0046324)	1/31	0.368679	0.476978	0	0	2.23664	2.23179	IRS1
Regulation Of mRNA Processing (GO:0050684)	1/31	0.368679	0.476978	0	0	2.23664	2.23179	ZFP36L1
Arachidonic Acid Metabolic Process (GO:0019369)	1/31	0.368679	0.476978	0	0	2.23664	2.23179	MGLL
Regulation Of Potassium Ion Transmembrane Transport (GO:1901379)	1/31	0.368679	0.476978	0	0	2.23664	2.23179	KCNE1
Cellular Response To Amino Acid Stimulus (GO:0071230)	1/31	0.368679	0.476978	0	0	2.23664	2.23179	SESN3
Cellular Response To Amyloid-Beta (GO:1904646)	1/31	0.368679	0.476978	0	0	2.23664	2.23179	EPHA4
Keratinocyte Differentiation (GO:0030216)	1/31	0.368679	0.476978	0	0	2.23664	2.23179	FGFR1
miRNA Processing (GO:0035196)	1/31	0.368679	0.476978	0	0	2.23664	2.23179	LIN28B
Negative Regulation Of Microtubule Polymerization Or Depolymerization (GO:0031111)	1/31	0.368679	0.476978	0	0	2.23664	2.23179	HDGFL3
Negative Regulation Of Proteolysis (GO:0045861)	1/31	0.368679	0.476978	0	0	2.23664	2.23179	EPHA4
Non-Motile Cilium Assembly (GO:1905515)	1/31	0.368679	0.476978	0	0	2.23664	2.23179	RPGRIP1L
Organic Cation Transport (GO:0015695)	1/31	0.368679	0.476978	0	0	2.23664	2.23179	SLC22A3
Positive Regulation Of Lamellipodium Organization (GO:1902745)	1/31	0.368679	0.476978	0	0	2.23664	2.23179	RREB1
Positive Regulation Of Phospholipase C Activity (GO:0010863)	1/31	0.368679	0.476978	0	0	2.23664	2.23179	FGFR1
Protein Destabilization (GO:0031648)	1/31	0.368679	0.476978	0	0	2.23664	2.23179	HTT
Protein Targeting To Vacuole (GO:0006623)	1/31	0.368679	0.476978	0	0	2.23664	2.23179	SORL1
Negative Regulation Of Nucleic Acid-Templated Transcription (GO:1903507)	7/398	0.370197	0.478568	0	0	1.20417	1.19661	L3MBTL3;DACH1;NFIL3;SFMBT1;PROX1;CLOCK;BMP7
Positive Regulation Of Intracellular Signal Transduction (GO:1902533)	8/464	0.375062	0.480386	0	0	1.18019	1.15737	ANGPT1;PDGFC;REL;ROR1;PRKD1;ADRA1B;BMP7;FGFR1
Positive Regulation Of Phosphorylation (GO:0042327)	4/211	0.376533	0.480386	0	0	1.29842	1.26823	ANGPT1;FGF18;ROR1;FGFR1
Positive Regulation Of DNA-templated Transcription (GO:0045893)	18/1115	0.37673	0.480386	0	0	1.10593	1.07963	BCL11B;ANKRD23;TET1;ESRRG;PROX1;BMP7;MEIS1;NFIL3;GDNF;HJV;REL;PRKD1;LPIN1;CLOCK;RREB1;TEAD1;SOX4;ZBED3
Positive Regulation Of Supramolecular Fiber Organization (GO:1902905)	2/89	0.377655	0.480386	0	0	1.5434	1.50292	PROX1;MAPT
Regulation Of Erythrocyte Differentiation (GO:0045646)	1/32	0.377985	0.480386	0	0	2.16437	2.10572	ZFP36L1
Actin Filament Bundle Assembly (GO:0051017)	1/32	0.377985	0.480386	0	0	2.16437	2.10572	SHROOM2
Actin Filament Bundle Organization (GO:0061572)	1/32	0.377985	0.480386	0	0	2.16437	2.10572	SHROOM2
Apoptotic Mitochondrial Changes (GO:0008637)	1/32	0.377985	0.480386	0	0	2.16437	2.10572	GGCT
Regulation Of Protein Tyrosine Kinase Activity (GO:0061097)	1/32	0.377985	0.480386	0	0	2.16437	2.10572	EPHA4
Regulation Of Receptor Internalization (GO:0002090)	1/32	0.377985	0.480386	0	0	2.16437	2.10572	ANGPT1
Response To Estrogen (GO:0043627)	1/32	0.377985	0.480386	0	0	2.16437	2.10572	CITED4
Dendrite Morphogenesis (GO:0048813)	1/32	0.377985	0.480386	0	0	2.16437	2.10572	EPHB1
Transition Metal Ion Transport (GO:0000041)	1/32	0.377985	0.480386	0	0	2.16437	2.10572	CP
Negative Regulation Of JNK Cascade (GO:0046329)	1/32	0.377985	0.480386	0	0	2.16437	2.10572	DUSP3
Negative Regulation Of Epithelial Cell Apoptotic Process (GO:1904036)	1/32	0.377985	0.480386	0	0	2.16437	2.10572	NDNF
Negative Regulation Of Sequestering Of Calcium Ion (GO:0051283)	1/32	0.377985	0.480386	0	0	2.16437	2.10572	RYR2
Negative Regulation Of Smooth Muscle Cell Proliferation (GO:0048662)	1/32	0.377985	0.480386	0	0	2.16437	2.10572	PRKG1
Phosphatidic Acid Metabolic Process (GO:0046473)	1/32	0.377985	0.480386	0	0	2.16437	2.10572	PNPLA3
Positive Regulation Of Neuron Death (GO:1901216)	1/32	0.377985	0.480386	0	0	2.16437	2.10572	MAPT
Proteoglycan Biosynthetic Process (GO:0030166)	1/32	0.377985	0.480386	0	0	2.16437	2.10572	GAL3ST3
Purine Ribonucleoside Triphosphate Metabolic Process (GO:0009205)	1/32	0.377985	0.480386	0	0	2.16437	2.10572	OLA1
Regulation Of DNA Biosynthetic Process (GO:2000278)	1/32	0.377985	0.480386	0	0	2.16437	2.10572	DACH1
Positive Regulation Of Programmed Cell Death (GO:0043068)	4/212	0.379868	0.482409	0	0	1.2921	1.25067	HTT;ANO6;SLIT2;SOX4
Cell Junction Assembly (GO:0034329)	2/90	0.382898	0.485513	0	0	1.52577	1.46472	KIRREL3;CDH11
Hemopoiesis (GO:0030097)	2/90	0.382898	0.485513	0	0	1.52577	1.46472	KIRREL3;MEIS1
Nitrogen Compound Transport (GO:0071705)	3/151	0.38384	0.485702	0	0	1.36138	1.30356	SLC22A3;SLC43A2;CMTM6
Regulation Of Lamellipodium Assembly (GO:0010591)	1/33	0.387154	0.485702	0	0	2.09661	1.98954	SLIT2
Action Potential (GO:0001508)	1/33	0.387154	0.485702	0	0	2.09661	1.98954	KCNE1
Adherens Junction Organization (GO:0034332)	1/33	0.387154	0.485702	0	0	2.09661	1.98954	CDH11
Regulation Of Neuronal Synaptic Plasticity (GO:0048168)	1/33	0.387154	0.485702	0	0	2.09661	1.98954	SHISA6
Regulation Of Peptidyl-Threonine Phosphorylation (GO:0010799)	1/33	0.387154	0.485702	0	0	2.09661	1.98954	BMP7
Establishment Of Mitotic Spindle Localization (GO:0040001)	1/33	0.387154	0.485702	0	0	2.09661	1.98954	HTT
Establishment Of Spindle Orientation (GO:0051294)	1/33	0.387154	0.485702	0	0	2.09661	1.98954	HTT
Membrane Protein Proteolysis (GO:0033619)	1/33	0.387154	0.485702	0	0	2.09661	1.98954	ADAM19
Muscle Tissue Development (GO:0060537)	1/33	0.387154	0.485702	0	0	2.09661	1.98954	IGSF8
Negative Regulation Of DNA Metabolic Process (GO:0051053)	1/33	0.387154	0.485702	0	0	2.09661	1.98954	DACH1
Negative Regulation Of Transferase Activity (GO:0051348)	1/33	0.387154	0.485702	0	0	2.09661	1.98954	MAPT
Positive Regulation Of RNA Metabolic Process (GO:0051254)	1/33	0.387154	0.485702	0	0	2.09661	1.98954	LIN28B
Positive Regulation Of Substrate Adhesion-Dependent Cell Spreading (GO:1900026)	1/33	0.387154	0.485702	0	0	2.09661	1.98954	RREB1
MAPK Cascade (GO:0000165)	2/91	0.388123	0.486549	0	0	1.50855	1.42774	ZFP36L1;FGFR1
RNA Transport (GO:0050658)	1/34	0.396189	0.4933	0	0	2.03296	1.88225	ZFP36L1
Regulation Of Phosphoprotein Phosphatase Activity (GO:0043666)	1/34	0.396189	0.4933	0	0	2.03296	1.88225	HTT
Cellular Response To Heat (GO:0034605)	1/34	0.396189	0.4933	0	0	2.03296	1.88225	MAPT
Release Of Sequestered Calcium Ion Into Cytosol (GO:0051209)	1/34	0.396189	0.4933	0	0	2.03296	1.88225	RYR2
Connective Tissue Development (GO:0061448)	1/34	0.396189	0.4933	0	0	2.03296	1.88225	SULF2
Substrate Adhesion-Dependent Cell Spreading (GO:0034446)	1/34	0.396189	0.4933	0	0	2.03296	1.88225	PARVB
Negative Regulation Of Endothelial Cell Proliferation (GO:0001937)	1/34	0.396189	0.4933	0	0	2.03296	1.88225	ALOX5
Negative Regulation Of Type I Interferon Production (GO:0032480)	1/34	0.396189	0.4933	0	0	2.03296	1.88225	REL
Positive Regulation Of Cation Channel Activity (GO:2001259)	1/34	0.396189	0.4933	0	0	2.03296	1.88225	HTT
Positive Regulation Of Kinase Activity (GO:0033674)	2/94	0.403677	0.498018	0	0	1.4591	1.32361	ROR1;FGFR1
RNA Stabilization (GO:0043489)	1/35	0.405091	0.498018	0	0	1.97306	1.78294	GDNF
Regulation Of Mitochondrial Membrane Potential (GO:0051881)	1/35	0.405091	0.498018	0	0	1.97306	1.78294	MAPT
Regulation Of Nitric Oxide Biosynthetic Process (GO:0045428)	1/35	0.405091	0.498018	0	0	1.97306	1.78294	DDAH1
Calcium-Dependent Cell-Cell Adhesion Via Plasma Membrane Cell Adhesion Molecules (GO:0016339)	1/35	0.405091	0.498018	0	0	1.97306	1.78294	CDH11
Regulation Of Protein Dephosphorylation (GO:0035304)	1/35	0.405091	0.498018	0	0	1.97306	1.78294	HTT
Regulation Of Vascular Associated Smooth Muscle Cell Proliferation (GO:1904705)	1/35	0.405091	0.498018	0	0	1.97306	1.78294	PRKG1
Response To Transforming Growth Factor Beta (GO:0071559)	1/35	0.405091	0.498018	0	0	1.97306	1.78294	ZFP36L1
Establishment Of Protein Localization To Plasma Membrane (GO:0061951)	1/35	0.405091	0.498018	0	0	1.97306	1.78294	RAB31
Visual System Development (GO:0150063)	1/35	0.405091	0.498018	0	0	1.97306	1.78294	MEIS1
Negative Regulation Of Mitochondrion Organization (GO:0010823)	1/35	0.405091	0.498018	0	0	1.97306	1.78294	MAPT
Negative Regulation Of Mitotic Cell Cycle Phase Transition (GO:1901991)	1/35	0.405091	0.498018	0	0	1.97306	1.78294	ZFP36L1
Negative Regulation Of Organelle Assembly (GO:1902116)	1/35	0.405091	0.498018	0	0	1.97306	1.78294	FEZ2
Negative Regulation Of Stress-Activated MAPK Cascade (GO:0032873)	1/35	0.405091	0.498018	0	0	1.97306	1.78294	DUSP3
Negative Regulation Of Transport (GO:0051051)	1/35	0.405091	0.498018	0	0	1.97306	1.78294	PRKD1
Positive Regulation Of Myeloid Leukocyte Differentiation (GO:0002763)	1/35	0.405091	0.498018	0	0	1.97306	1.78294	ZFP36L1
Positive Regulation Of Myoblast Differentiation (GO:0045663)	1/35	0.405091	0.498018	0	0	1.97306	1.78294	SOX4
Cell-Cell Adhesion Via Plasma-Membrane Adhesion Molecules (GO:0098742)	3/157	0.407629	0.500396	0	0	1.30789	1.1737	KIRREL3;CDH11;GPC4
Heart Development (GO:0007507)	3/157	0.407629	0.500396	0	0	1.30789	1.1737	ALPK2;BMP7;SOX4
Negative Regulation Of Programmed Cell Death (GO:0043069)	6/351	0.413424	0.506545	0	0	1.16833	1.03196	RNF157;TSC22D1;GRK5;GDNF;ANGPT1;ANGPTL4
Regulation Of Sodium Ion Transmembrane Transporter Activity (GO:2000649)	1/36	0.413862	0.506545	0	0	1.91658	1.69085	FXYD6
Skeletal Muscle Tissue Development (GO:0007519)	1/36	0.413862	0.506545	0	0	1.91658	1.69085	IGSF8
Melanosome Organization (GO:0032438)	1/36	0.413862	0.506545	0	0	1.91658	1.69085	SHROOM2
Negative Regulation Of DNA-templated Transcription (GO:0045892)	13/811	0.416166	0.508989	0	0	1.09552	0.960409	L3MBTL3;SFMBT1;TET1;PROX1;BMP7;DACH1;NFIL3;HJV;GTF2IRD1;CLOCK;RREB1;SOX4;FRK
Regulation Of Cytokine Production Involved In Inflammatory Response (GO:1900015)	1/37	0.422504	0.512577	0	0	1.86323	1.60528	ALOX5
Regulation Of Monoatomic Cation Transmembrane Transport (GO:1904062)	1/37	0.422504	0.512577	0	0	1.86323	1.60528	KCNE1
Aortic Valve Development (GO:0003176)	1/37	0.422504	0.512577	0	0	1.86323	1.60528	SLIT2
Regulation Of Neurotransmitter Secretion (GO:0046928)	1/37	0.422504	0.512577	0	0	1.86323	1.60528	RIMS4
Regulation Of Receptor-Mediated Endocytosis (GO:0048259)	1/37	0.422504	0.512577	0	0	1.86323	1.60528	SNAP91
Glycolipid Biosynthetic Process (GO:0009247)	1/37	0.422504	0.512577	0	0	1.86323	1.60528	ST3GAL4
Positive Regulation Of ATP-dependent Activity (GO:0032781)	1/37	0.422504	0.512577	0	0	1.86323	1.60528	RYR2
Positive Regulation Of Chemotaxis (GO:0050921)	1/37	0.422504	0.512577	0	0	1.86323	1.60528	PRKD1
Positive Regulation Of Lipid Biosynthetic Process (GO:0046889)	1/37	0.422504	0.512577	0	0	1.86323	1.60528	ELOVL5
Positive Regulation Of Monoatomic Ion Transport (GO:0043270)	1/37	0.422504	0.512577	0	0	1.86323	1.60528	ANO6
Protein Localization To Lysosome (GO:0061462)	1/37	0.422504	0.512577	0	0	1.86323	1.60528	SORL1
Regulation Of Cytosolic Calcium Ion Concentration (GO:0051480)	1/38	0.43102	0.518351	0	0	1.81277	1.52563	RYR2
Amino Acid Catabolic Process (GO:0009063)	1/38	0.43102	0.518351	0	0	1.81277	1.52563	HNMT
Carboxylic Acid Transmembrane Transport (GO:1905039)	1/38	0.43102	0.518351	0	0	1.81277	1.52563	SLC16A9
Cellular Response To Glucose Starvation (GO:0042149)	1/38	0.43102	0.518351	0	0	1.81277	1.52563	SESN3
Signal Release From Synapse (GO:0099643)	1/38	0.43102	0.518351	0	0	1.81277	1.52563	STXBP1
Negative Regulation Of T Cell Activation (GO:0050868)	1/38	0.43102	0.518351	0	0	1.81277	1.52563	DUSP3
Negative Regulation Of Viral Genome Replication (GO:0045071)	1/38	0.43102	0.518351	0	0	1.81277	1.52563	PROX1
Organic Hydroxy Compound Transport (GO:0015850)	1/38	0.43102	0.518351	0	0	1.81277	1.52563	SLC22A3
Positive Regulation Of Cell Death (GO:0010942)	1/38	0.43102	0.518351	0	0	1.81277	1.52563	MAPT
Positive Regulation Of miRNA Transcription (GO:1902895)	1/38	0.43102	0.518351	0	0	1.81277	1.52563	TEAD1
Regulation Of Autophagosome Assembly (GO:2000785)	1/38	0.43102	0.518351	0	0	1.81277	1.52563	FEZ2
Regulation Of Cell-Cell Adhesion (GO:0022407)	1/38	0.43102	0.518351	0	0	1.81277	1.52563	PLPP3
Peptidyl-Serine Modification (GO:0018209)	3/164	0.435027	0.522746	0	0	1.25053	1.04087	NDNF;PRKD1;MARK1
DNA Integrity Checkpoint Signaling (GO:0031570)	1/39	0.43941	0.522746	0	0	1.76497	1.45137	CLOCK
DNA Recombination (GO:0006310)	1/39	0.43941	0.522746	0	0	1.76497	1.45137	HMGB3
Regulation Of Heart Rate By Cardiac Conduction (GO:0086091)	1/39	0.43941	0.522746	0	0	1.76497	1.45137	KCNE1
Regulation Of Microtubule Polymerization (GO:0031113)	1/39	0.43941	0.522746	0	0	1.76497	1.45137	MAPT
Regulation Of Small Molecule Metabolic Process (GO:0062012)	1/39	0.43941	0.522746	0	0	1.76497	1.45137	PDK4
Regulation Of Ubiquitin-Dependent Protein Catabolic Process (GO:2000058)	1/39	0.43941	0.522746	0	0	1.76497	1.45137	L3MBTL3
Response To Amyloid-Beta (GO:1904645)	1/39	0.43941	0.522746	0	0	1.76497	1.45137	EPHA4
Secondary Alcohol Metabolic Process (GO:1902652)	1/39	0.43941	0.522746	0	0	1.76497	1.45137	ANGPTL3
Stress-Activated MAPK Cascade (GO:0051403)	1/39	0.43941	0.522746	0	0	1.76497	1.45137	ZFP36L1
Negative Regulation Of mRNA Catabolic Process (GO:1902373)	1/39	0.43941	0.522746	0	0	1.76497	1.45137	GDNF
Phosphatidylinositol Phosphate Biosynthetic Process (GO:0046854)	1/39	0.43941	0.522746	0	0	1.76497	1.45137	TTC7B
Positive Regulation Of Intracellular Transport (GO:0032388)	1/39	0.43941	0.522746	0	0	1.76497	1.45137	SORL1
Positive Regulation Of Receptor-Mediated Endocytosis (GO:0048260)	1/39	0.43941	0.522746	0	0	1.76497	1.45137	ANGPT1
Regulation Of DNA-templated Transcription Elongation (GO:0032784)	1/39	0.43941	0.522746	0	0	1.76497	1.45137	INTS2
Regulation Of Filopodium Assembly (GO:0051489)	1/40	0.447677	0.528029	0	0	1.71961	1.38202	DAAM2
Regulation Of Microtubule Cytoskeleton Organization (GO:0070507)	1/40	0.447677	0.528029	0	0	1.71961	1.38202	MAPT
Bone Development (GO:0060348)	1/40	0.447677	0.528029	0	0	1.71961	1.38202	SULF2
Regulation Of Transport (GO:0051049)	1/40	0.447677	0.528029	0	0	1.71961	1.38202	ICA1
Regulation Of Wound Healing (GO:0061041)	1/40	0.447677	0.528029	0	0	1.71961	1.38202	ALOX5
Response To Hydrogen Peroxide (GO:0042542)	1/40	0.447677	0.528029	0	0	1.71961	1.38202	STK24
Embryonic Heart Tube Morphogenesis (GO:0003143)	1/40	0.447677	0.528029	0	0	1.71961	1.38202	RYR2
Epithelial Cell Migration (GO:0010631)	1/40	0.447677	0.528029	0	0	1.71961	1.38202	DAAM2
Hexose Metabolic Process (GO:0019318)	1/40	0.447677	0.528029	0	0	1.71961	1.38202	H6PD
Intracellular Glucose Homeostasis (GO:0001678)	1/40	0.447677	0.528029	0	0	1.71961	1.38202	SOX4
Negative Regulation Of Cold-Induced Thermogenesis (GO:0120163)	1/40	0.447677	0.528029	0	0	1.71961	1.38202	NPR3
Positive Regulation Of Stem Cell Population Maintenance (GO:1902459)	1/40	0.447677	0.528029	0	0	1.71961	1.38202	TET1
Regulation Of Transforming Growth Factor Beta Receptor Signaling Pathway (GO:0017015)	2/104	0.454085	0.534213	0	0	1.3153	1.03839	TET1;NREP
Negative Regulation Of Canonical Wnt Signaling Pathway (GO:0090090)	2/104	0.454085	0.534213	0	0	1.3153	1.03839	TMEM88B;SHISA6
Negative Regulation Of Growth (GO:0045926)	2/104	0.454085	0.534213	0	0	1.3153	1.03839	SLIT2;DCBLD2
Negative Regulation Of Signal Transduction (GO:0009968)	4/235	0.455655	0.534213	0	0	1.16191	0.913284	IRS1;RPGRIP1L;CXXC4;SULF2
Regulation Of Microtubule-Based Process (GO:0032886)	1/41	0.455823	0.534213	0	0	1.67653	1.31717	MAPT
Mitotic Spindle Assembly (GO:0090307)	1/41	0.455823	0.534213	0	0	1.67653	1.31717	KIF2A
Monoatomic Cation Transport (GO:0006812)	1/41	0.455823	0.534213	0	0	1.67653	1.31717	ANO6
Regulation Of T Cell Activation (GO:0050863)	1/41	0.455823	0.534213	0	0	1.67653	1.31717	DUSP3
Regulation Of Cell-Substrate Adhesion (GO:0010810)	1/41	0.455823	0.534213	0	0	1.67653	1.31717	NDNF
Positive Regulation Of Apoptotic Process (GO:0043065)	4/236	0.458891	0.536788	0	0	1.15684	0.901109	HTT;ANO6;SLIT2;SOX4
Regulation Of Protein Ubiquitination (GO:0031396)	2/105	0.458993	0.536788	0	0	1.30246	1.01425	ANGPT1;SOX4
Regulation Of Protein-Containing Complex Assembly (GO:0043254)	2/105	0.458993	0.536788	0	0	1.30246	1.01425	STXBP1;SORL1
Endomembrane System Organization (GO:0010256)	3/171	0.461947	0.539862	0	0	1.19794	0.925175	RAB30;HTT;PRKD1
Regulation Of Cellular Metabolic Process (GO:0031323)	1/42	0.463849	0.540939	0	0	1.63554	1.25642	PDK4
I-kappaB kinase/NF-kappaB Signaling (GO:0007249)	1/42	0.463849	0.540939	0	0	1.63554	1.25642	REL
Positive Regulation Of Reactive Oxygen Species Metabolic Process (GO:2000379)	1/42	0.463849	0.540939	0	0	1.63554	1.25642	MAPT
Regulation Of Chromosome Organization (GO:0033044)	1/43	0.471757	0.546696	0	0	1.59651	1.19945	MAPT
Regulation Of Signal Transduction By P53 Class Mediator (GO:1901796)	1/43	0.471757	0.546696	0	0	1.59651	1.19945	SOX4
Cellular Response To Mechanical Stimulus (GO:0071260)	1/43	0.471757	0.546696	0	0	1.59651	1.19945	TMEM150C
Cellular Response To Radiation (GO:0071478)	1/43	0.471757	0.546696	0	0	1.59651	1.19945	CLOCK
Epidermal Cell Differentiation (GO:0009913)	1/43	0.471757	0.546696	0	0	1.59651	1.19945	FGFR1
mRNA Destabilization (GO:0061157)	1/43	0.471757	0.546696	0	0	1.59651	1.19945	ZFP36L1
Myelination (GO:0042552)	1/43	0.471757	0.546696	0	0	1.59651	1.19945	EPB41L3
Neurotransmitter Secretion (GO:0007269)	1/43	0.471757	0.546696	0	0	1.59651	1.19945	STXBP1
Receptor Internalization (GO:0031623)	1/43	0.471757	0.546696	0	0	1.59651	1.19945	RAB31
Regulation Of Protein Catabolic Process (GO:0042176)	2/109	0.478366	0.552632	0	0	1.25348	0.924292	ASB5;SORL1
Regulation Of Fibroblast Proliferation (GO:0048145)	1/44	0.479548	0.552632	0	0	1.55929	1.14594	PDGFC
Regulation Of Interferon-Beta Production (GO:0032648)	1/44	0.479548	0.552632	0	0	1.55929	1.14594	REL
Cardiac Conduction (GO:0061337)	1/44	0.479548	0.552632	0	0	1.55929	1.14594	KCNE1
Regulation Of Stem Cell Differentiation (GO:2000736)	1/44	0.479548	0.552632	0	0	1.55929	1.14594	GDNF
Intrinsic Apoptotic Signaling Pathway In Response To DNA Damage (GO:0008630)	1/44	0.479548	0.552632	0	0	1.55929	1.14594	DDIT4
Negative Regulation Of Endopeptidase Activity (GO:0010951)	1/44	0.479548	0.552632	0	0	1.55929	1.14594	SORL1
Positive Regulation Of Leukocyte Chemotaxis (GO:0002690)	1/44	0.479548	0.552632	0	0	1.55929	1.14594	ANO6
Positive Regulation Of Macromolecule Biosynthetic Process (GO:0010557)	2/110	0.483143	0.556387	0	0	1.24181	0.903342	IRS1;SOX4
Regulation Of Epidermal Growth Factor Receptor Signaling Pathway (GO:0042058)	1/45	0.487226	0.559135	0	0	1.52377	1.09563	DUSP3
Regulation Of Release Of Sequestered Calcium Ion Into Cytosol (GO:0051279)	1/45	0.487226	0.559135	0	0	1.52377	1.09563	CASQ2
Regulation Of Substrate Adhesion-Dependent Cell Spreading (GO:1900024)	1/45	0.487226	0.559135	0	0	1.52377	1.09563	RREB1
Positive Regulation Of mRNA Catabolic Process (GO:0061014)	1/45	0.487226	0.559135	0	0	1.52377	1.09563	ZFP36L1
Positive Regulation Of Pathway-Restricted SMAD Protein Phosphorylation (GO:0010862)	1/45	0.487226	0.559135	0	0	1.52377	1.09563	BMP7
Response To Cytokine (GO:0034097)	2/111	0.487893	0.559135	0	0	1.23034	0.882966	MME;REL
Positive Regulation Of Peptidyl-Tyrosine Phosphorylation (GO:0050731)	2/111	0.487893	0.559135	0	0	1.23034	0.882966	EPHA4;ANGPT1
Chemical Synaptic Transmission (GO:0007268)	4/246	0.490866	0.562153	0	0	1.1084	0.788717	STXBP1;AMPH;KCNK3;SHISA6
Non-Membrane-Bounded Organelle Assembly (GO:0140694)	2/112	0.492616	0.563143	0	0	1.21909	0.863146	CDS1;MAPT
Golgi To Plasma Membrane Transport (GO:0006893)	1/46	0.49479	0.563143	0	0	1.48982	1.04827	RAB31
RNA Modification (GO:0009451)	1/46	0.49479	0.563143	0	0	1.48982	1.04827	DTWD2
SMAD Protein Signal Transduction (GO:0060395)	1/46	0.49479	0.563143	0	0	1.48982	1.04827	BMP7
Regulation Of mRNA Catabolic Process (GO:0061013)	1/46	0.49479	0.563143	0	0	1.48982	1.04827	ZFP36L1
tRNA Processing (GO:0008033)	1/46	0.49479	0.563143	0	0	1.48982	1.04827	DTWD2
Negative Regulation Of Cytokine-Mediated Signaling Pathway (GO:0001960)	1/46	0.49479	0.563143	0	0	1.48982	1.04827	SLIT2
Negative Regulation Of Metabolic Process (GO:0009892)	1/46	0.49479	0.563143	0	0	1.48982	1.04827	NPR3
Regulation Of TORC1 Signaling (GO:1903432)	1/46	0.49479	0.563143	0	0	1.48982	1.04827	SESN3
Protein Localization To Membrane (GO:0072657)	3/180	0.495718	0.563811	0	0	1.13644	0.797495	STXBP1;EPB41L3;TTC7B
Negative Regulation Of Transcription By RNA Polymerase II (GO:0000122)	9/587	0.497812	0.565804	0	0	1.04411	0.728301	DACH1;NFIL3;HJV;TET1;GTF2IRD1;PROX1;RREB1;SOX4;FRK
Regulation Of Mitochondrion Organization (GO:0010821)	1/47	0.502243	0.569278	0	0	1.45735	1.00363	MAPT
Cartilage Development (GO:0051216)	1/47	0.502243	0.569278	0	0	1.45735	1.00363	SULF2
Regulation Of Stress-Activated MAPK Cascade (GO:0032872)	1/47	0.502243	0.569278	0	0	1.45735	1.00363	EPHB1
Positive Regulation Of Ras Protein Signal Transduction (GO:0046579)	1/47	0.502243	0.569278	0	0	1.45735	1.00363	RTN4R
Positive Regulation Of Protein Metabolic Process (GO:0051247)	3/182	0.50308	0.569836	0	0	1.12361	0.771929	ASB5;SORL1;SOX4
Positive Regulation Of Macromolecule Metabolic Process (GO:0010604)	5/319	0.506385	0.573188	0	0	1.0675	0.726386	ADAM19;ANGPT1;FGF18;BMP7;MARK1
Ceramide Metabolic Process (GO:0006672)	1/48	0.509587	0.57524	0	0	1.42626	0.961521	PLPP3
Cytoplasmic Microtubule Organization (GO:0031122)	1/48	0.509587	0.57524	0	0	1.42626	0.961521	MAPT
Intermediate Filament Organization (GO:0045109)	1/48	0.509587	0.57524	0	0	1.42626	0.961521	BFSP2
Negative Regulation Of Viral Process (GO:0048525)	1/48	0.509587	0.57524	0	0	1.42626	0.961521	PROX1
DNA-templated Transcription (GO:0006351)	3/184	0.510387	0.57575	0	0	1.11107	0.74729	TSC22D1;RREB1;ZFP36L1
Protein Modification Process (GO:0036211)	10/664	0.515648	0.581289	0	0	1.02477	0.678735	EPHA4;MSRA;GRK5;STK24;PDK4;ST3GAL4;EPHB1;PRKG1;MARK1;FGFR1
Regulation Of Cyclin-Dependent Protein Kinase Activity (GO:1904029)	1/49	0.516823	0.581426	0	0	1.39647	0.921746	CCNJL
Negative Regulation Of Protein Ubiquitination (GO:0031397)	1/49	0.516823	0.581426	0	0	1.39647	0.921746	SOX4
Regulation Of Cell Development (GO:0060284)	1/49	0.516823	0.581426	0	0	1.39647	0.921746	CLOCK
Protein Modification By Small Protein Conjugation (GO:0032446)	5/323	0.517406	0.581687	0	0	1.05382	0.694394	RNF157;HERC3;KLHL8;ASB5;PDZRN3
NADH Dehydrogenase Complex Assembly (GO:0010257)	1/50	0.523952	0.58626	0	0	1.36789	0.884143	NDUFAF5
Regulation Of Reactive Oxygen Species Metabolic Process (GO:2000377)	1/50	0.523952	0.58626	0	0	1.36789	0.884143	ALOX5
Cellular Response To Ionizing Radiation (GO:0071479)	1/50	0.523952	0.58626	0	0	1.36789	0.884143	CLOCK
Sterol Metabolic Process (GO:0016125)	1/50	0.523952	0.58626	0	0	1.36789	0.884143	ANGPTL3
Mitochondrial Respiratory Chain Complex I Assembly (GO:0032981)	1/50	0.523952	0.58626	0	0	1.36789	0.884143	NDUFAF5
Negative Regulation Of Protein Modification By Small Protein Conjugation Or Removal (GO:1903321)	1/50	0.523952	0.58626	0	0	1.36789	0.884143	SOX4
Negative Regulation Of Protein-Containing Complex Assembly (GO:0031333)	1/50	0.523952	0.58626	0	0	1.36789	0.884143	SORL1
Transmembrane Receptor Protein Serine/Threonine Kinase Signaling Pathway (GO:0007178)	2/120	0.529392	0.591947	0	0	1.13592	0.722474	HJV;BMP7
Actin Cytoskeleton Reorganization (GO:0031532)	1/51	0.530977	0.592519	0	0	1.34046	0.848559	PARVB
Regulation Of miRNA Transcription (GO:1902893)	1/51	0.530977	0.592519	0	0	1.34046	0.848559	TEAD1
Regulation Of Alternative mRNA Splicing, Via Spliceosome (GO:0000381)	1/51	0.530977	0.592519	0	0	1.34046	0.848559	SRRM4
Regulation Of Protein Kinase B Signaling (GO:0051896)	2/121	0.533861	0.595335	0	0	1.12631	0.706894	ANGPT1;FGFR1
Regulation Of Focal Adhesion Assembly (GO:0051893)	1/52	0.537899	0.598629	0	0	1.3141	0.814854	DUSP3
Signal Transduction In Response To DNA Damage (GO:0042770)	1/52	0.537899	0.598629	0	0	1.3141	0.814854	CLOCK
Glucose Metabolic Process (GO:0006006)	1/52	0.537899	0.598629	0	0	1.3141	0.814854	H6PD
Regulation Of Mitotic Nuclear Division (GO:0007088)	1/53	0.544718	0.604999	0	0	1.28876	0.782902	BMP7
Positive Regulation Of Proteolysis (GO:0045862)	1/53	0.544718	0.604999	0	0	1.28876	0.782902	SH3D19
Regulation Of Cation Channel Activity (GO:2001257)	1/53	0.544718	0.604999	0	0	1.28876	0.782902	KCNE1
Positive Regulation Of Mitochondrion Organization (GO:0010822)	1/54	0.551437	0.612051	0	0	1.26437	0.752585	HTT
Regulation Of Stem Cell Population Maintenance (GO:2000036)	1/55	0.558058	0.618157	0	0	1.24088	0.723797	TET1
Regulation Of Viral Genome Replication (GO:0045069)	1/55	0.558058	0.618157	0	0	1.24088	0.723797	PROX1
Response To Light Stimulus (GO:0009416)	1/55	0.558058	0.618157	0	0	1.24088	0.723797	CLOCK
Regulation Of I-kappaB kinase/NF-kappaB Signaling (GO:0043122)	3/198	0.559889	0.61977	0	0	1.03047	0.597692	REL;ROR1;PRKD1
Skin Development (GO:0043588)	1/56	0.564581	0.622468	0	0	1.21825	0.696439	FGFR1
mRNA Transport (GO:0051028)	1/56	0.564581	0.622468	0	0	1.21825	0.696439	ZFP36L1
Negative Regulation Of Kinase Activity (GO:0033673)	1/56	0.564581	0.622468	0	0	1.21825	0.696439	MAPT
Peptidyl-Threonine Phosphorylation (GO:0018107)	1/56	0.564581	0.622468	0	0	1.21825	0.696439	PRKD1
Positive Regulation Of Cell Junction Assembly (GO:1901890)	1/56	0.564581	0.622468	0	0	1.21825	0.696439	EPHB1
post-Golgi Vesicle-Mediated Transport (GO:0006892)	1/56	0.564581	0.622468	0	0	1.21825	0.696439	SORL1
DNA-templated Transcription Initiation (GO:0006352)	1/57	0.571008	0.627465	0	0	1.19643	0.67042	ZFP36L1
Endocytic Recycling (GO:0032456)	1/57	0.571008	0.627465	0	0	1.19643	0.67042	CMTM6
Homophilic Cell Adhesion Via Plasma Membrane Adhesion Molecules (GO:0007156)	1/57	0.571008	0.627465	0	0	1.19643	0.67042	KIRREL3
Microtubule Cytoskeleton Organization Involved In Mitosis (GO:1902850)	1/57	0.571008	0.627465	0	0	1.19643	0.67042	KIF2A
Positive Regulation Of T Cell Differentiation (GO:0045582)	1/57	0.571008	0.627465	0	0	1.19643	0.67042	SOX4
Positive Regulation Of Protein Phosphorylation (GO:0001934)	5/344	0.573448	0.629728	0	0	0.987343	0.54905	ANGPT1;PDGFC;FGF18;PRKD1;BMP7
Regulation Of Embryonic Development (GO:0045995)	1/58	0.577341	0.632326	0	0	1.17537	0.645657	ZBED3
Cell Junction Organization (GO:0034330)	1/58	0.577341	0.632326	0	0	1.17537	0.645657	MAPT
Response To Metal Ion (GO:0010038)	1/58	0.577341	0.632326	0	0	1.17537	0.645657	MAPT
Neuropeptide Signaling Pathway (GO:0007218)	1/58	0.577341	0.632326	0	0	1.17537	0.645657	SORL1
Regulation Of Cytokine Production (GO:0001817)	2/132	0.58108	0.636	0	0	1.03036	0.559346	ALOX5;IGF2BP2
Activation Of Cysteine-Type Endopeptidase Activity Involved In Apoptotic Process (GO:0006919)	1/59	0.583581	0.636634	0	0	1.15504	0.622073	MAPT
Cholesterol Metabolic Process (GO:0008203)	1/59	0.583581	0.636634	0	0	1.15504	0.622073	ANGPTL3
Glycerophospholipid Metabolic Process (GO:0006650)	1/59	0.583581	0.636634	0	0	1.15504	0.622073	PNPLA3
Negative Regulation Of Cell Death (GO:0060548)	1/59	0.583581	0.636634	0	0	1.15504	0.622073	SORL1
Positive Regulation Of Organelle Assembly (GO:1902117)	1/59	0.583581	0.636634	0	0	1.15504	0.622073	HTT
Proteolysis (GO:0006508)	4/277	0.58437	0.637075	0	0	0.98078	0.526895	ADAM19;CAPN11;MME;ADAMTS9
Negative Regulation Of DNA-binding Transcription Factor Activity (GO:0043433)	2/133	0.585195	0.637554	0	0	1.02243	0.54783	PROX1;BMP7
Regulation Of Cellular Catabolic Process (GO:0031329)	1/60	0.589729	0.642072	0	0	1.1354	0.599596	MAPT
Positive Regulation Of Gene Expression (GO:0010628)	6/422	0.591002	0.643035	0	0	0.964943	0.507498	ADAM19;ANGPT1;FGF18;BMP7;SOX4;MARK1
Spindle Assembly (GO:0051225)	1/61	0.595786	0.64739	0	0	1.11641	0.57816	KIF2A
Negative Regulation Of Cellular Catabolic Process (GO:0031330)	1/61	0.595786	0.64739	0	0	1.11641	0.57816	SORL1
Dephosphorylation (GO:0016311)	2/136	0.59736	0.648675	0	0	0.999371	0.514911	DUSP3;PLPP3
Gland Development (GO:0048732)	1/62	0.601755	0.65259	0	0	1.09805	0.557705	PROX1
Monocarboxylic Acid Transport (GO:0015718)	1/62	0.601755	0.65259	0	0	1.09805	0.557705	SLC16A9
Cell-Cell Junction Organization (GO:0045216)	1/63	0.607635	0.657676	0	0	1.08028	0.538173	CDH11
tRNA Modification (GO:0006400)	1/63	0.607635	0.657676	0	0	1.08028	0.538173	DTWD2
Regulation Of Cell-Matrix Adhesion (GO:0001952)	1/63	0.607635	0.657676	0	0	1.08028	0.538173	DUSP3
Negative Regulation Of Epithelial Cell Proliferation (GO:0050680)	1/64	0.613429	0.662647	0	0	1.06307	0.519511	ALOX5
Peptidyl-Threonine Modification (GO:0018210)	1/64	0.613429	0.662647	0	0	1.06307	0.519511	PRKD1
Positive Regulation Of DNA Biosynthetic Process (GO:2000573)	1/64	0.613429	0.662647	0	0	1.06307	0.519511	CHTF8
Synapse Assembly (GO:0007416)	1/65	0.619138	0.668378	0	0	1.0464	0.501672	KIRREL3
Regulation Of Cilium Assembly (GO:1902017)	1/66	0.624763	0.672259	0	0	1.03024	0.484608	HTT
Negative Regulation Of Protein Binding (GO:0032091)	1/66	0.624763	0.672259	0	0	1.03024	0.484608	SORL1
Positive Regulation Of Protein Polymerization (GO:0032273)	1/66	0.624763	0.672259	0	0	1.03024	0.484608	MAPT
Positive Regulation Of Protein Transport (GO:0051222)	1/66	0.624763	0.672259	0	0	1.03024	0.484608	ACSL3
Regulation Of Cellular Biosynthetic Process (GO:0031326)	1/66	0.624763	0.672259	0	0	1.03024	0.484608	PDK4
Regulation Of Cellular Component Organization (GO:0051128)	2/144	0.628489	0.67583	0	0	0.942637	0.437795	PACSIN2;STON2
Cholesterol Homeostasis (GO:0042632)	1/67	0.630305	0.677342	0	0	1.01457	0.468278	ANGPTL3
Response To Ionizing Radiation (GO:0010212)	1/68	0.635765	0.681883	0	0	0.999373	0.452642	CLOCK
Sterol Homeostasis (GO:0055092)	1/68	0.635765	0.681883	0	0	0.999373	0.452642	ANGPTL3
Positive Regulation Of Peptidyl-Serine Phosphorylation (GO:0033138)	1/68	0.635765	0.681883	0	0	0.999373	0.452642	PRKD1
Regulation Of Plasma Membrane Bounded Cell Projection Assembly (GO:0120032)	1/69	0.641145	0.685876	0	0	0.984621	0.437663	DAAM2
Vesicle Fusion (GO:0006906)	1/69	0.641145	0.685876	0	0	0.984621	0.437663	STXBP1
Negative Regulation Of Blood Vessel Morphogenesis (GO:2000181)	1/69	0.641145	0.685876	0	0	0.984621	0.437663	ALOX5
[truncated: 109 more rows]

## Sheet: FB_ALDO_up
Term	Overlap	P-value	Adjusted P-value	Old P-value	Old Adjusted P-value	Odds Ratio	Combined Score	Genes
[truncated: 1,553 more rows]

[truncated: 3 more sheets: FB_ALDO_down, EC-cap_ALDO_up, EC-cap_ALDO_down]
