# Supplementary material for: Cardiorenal heart failure with preserved ejection fraction is caused by a reversible rise of mineralocorticoid-induced fibroblast subtypes
Source: Research Square preprint supplement (doi:10.21203/rs.3.rs-7039115/v1), 2025-07-14
Supplement: Supplementary file 2 [file 18be9b1a3be0d61c3729400a.xlsx]

## Sheet: modules_df
gene_name	module	color	kME_FB-M1	kME_FB-M2	kME_FB-M3	kME_FB-M4	kME_FB-M5	kME_FB-M6	kME_FB-M7	kME_FB-M8	kME_grey		hub_genes gene_name	module
Tgfbr2	FB-M1	#B33E52	0.148842	-0.0201233	0.0411265	-0.00831501	0.0608761	-0.00806641	-0.0324827	0.0862543	0.119494		Adgrd1	FB-M1
Tgfbr3	FB-M1	#B33E52	0.168052	0.016569	0.0281834	0.0172331	0.0536967	0.0696289	-0.0218001	0.0993035	0.145692		Sdk1	FB-M1
Col14a1	FB-M1	#B33E52	0.314946	-0.174952	0.0575787	-0.00274333	0.173437	-0.12834	-0.0985437	0.190278	0.131284		Gfpt2	FB-M1
Col5a1	FB-M1	#B33E52	0.203875	0.0342366	0.123142	-0.0392319	0.0373898	-0.0292278	-0.0535409	0.0749815	0.156316		Mfap5	FB-M1
A4galt	FB-M1	#B33E52	0.203246	-0.0497251	0.0636855	-0.0477071	-0.00424459	-0.070523	-0.0571401	0.0290694	0.0708937		Sema3c	FB-M1
Abca1	FB-M1	#B33E52	0.151957	-0.0180466	0.130311	0.0169487	0.0867201	7.86e-05	-0.0824745	0.0850371	0.128576		Ptprj	FB-M1
Abca5	FB-M1	#B33E52	0.106437	-0.0221845	0.0320278	0.022315	0.0177392	-0.0235301	-0.0140339	0.0469981	0.0721956		Axl	FB-M1
Abi1	FB-M1	#B33E52	0.189263	-0.00793728	-0.0190286	0.0447196	0.0698672	-0.00558117	0.0830757	0.154956	0.166234		Creb5	FB-M1
AC149090.1	FB-M1	#B33E52	0.164282	-0.0466646	0.00996302	-0.00176638	0.0202185	-0.0362904	-0.026155	0.0477324	0.0591644		Pi16	FB-M1
Acap3	FB-M1	#B33E52	0.0695198	0.00703206	0.0505854	-0.0260321	-0.00976895	-0.0220453	-0.0257446	0.0120229	0.0501188		Ackr3	FB-M1
Ackr3	FB-M1	#B33E52	0.388215	-0.235726	0.0521233	-0.02897	0.023452	-0.124865	-0.121553	0.0917233	0.065379		Fstl1	FB-M1
Adam9	FB-M1	#B33E52	0.176655	-0.00887036	0.0575135	0.00816816	0.0458205	-0.0569753	-0.0380363	0.0955964	0.12009		Cd55	FB-M1
Adamts19	FB-M1	#B33E52	0.281664	-0.162341	0.0434508	0.0191101	0.149691	-0.0854318	-0.060826	0.172642	0.12211		Fbln2	FB-M1
Adamts2	FB-M1	#B33E52	0.234037	-0.0965665	0.062855	-0.0242742	0.093402	-0.0035438	-0.0649486	0.102113	0.122833		Vcan	FB-M1
Adamtsl3	FB-M1	#B33E52	0.340008	-0.00845004	0.0654092	-0.0692177	0.000156263	-0.244616	-0.0873088	0.154639	0.128841		Gas7	FB-M1
Adamtsl4	FB-M1	#B33E52	0.171345	-0.0972987	0.0356883	0.00536341	0.0399756	-0.0621226	-0.0536658	0.0467555	0.0486457		Slco3a1	FB-M1
Adcy9	FB-M1	#B33E52	0.146922	-0.02714	0.0644049	0.0181301	0.049827	-0.0501273	-0.0309222	0.0735921	0.112217		Dpp4	FB-M1
Add3	FB-M1	#B33E52	0.241869	-0.0388451	0.0344688	0.0180353	0.0943981	-0.0501106	-0.00968843	0.170617	0.169507		Cd34	FB-M1
Adgrd1	FB-M1	#B33E52	0.523224	-0.33595	0.0894068	-0.0835075	-0.0440107	-0.113501	-0.176872	0.0514605	0.0734586		Uap1	FB-M1
Adgrg2	FB-M1	#B33E52	0.318621	-0.20917	0.0249652	0.00918511	0.0445298	-0.0744459	-0.0549791	0.114711	0.0925135		Adamtsl3	FB-M1
Aebp1	FB-M1	#B33E52	0.0994113	-0.0243839	0.0714651	1.77e-05	0.00214131	-0.0173419	-0.0485279	-0.000660235	0.0595268		Pcsk6	FB-M1
Aebp2	FB-M1	#B33E52	0.0790397	-0.0131858	0.04598	0.0167734	0.0149641	-0.00577651	-0.0314557	0.0330218	0.0714255		Sulf1	FB-M1
Afap1	FB-M1	#B33E52	0.149721	-0.0102967	0.0725272	-0.0013803	0.00889728	-0.0127887	-0.0300949	0.0518617	0.0980398		Ston2	FB-M1
Aff3	FB-M1	#B33E52	0.211605	-0.0697776	0.0733159	0.00773632	0.175245	0.0360312	-0.0507995	0.167638	0.154645		Pde10a	FB-M1
Agap1	FB-M1	#B33E52	0.158407	0.0252388	0.0614696	-0.0087428	-0.0179113	0.0105114	-0.020086	0.0474064	0.107934		Zfp521	FB-M1
Agpat4	FB-M1	#B33E52	0.149003	-0.0243077	0.0561843	-0.034132	0.0226164	-0.0201416	-0.037454	0.0567074	0.0798583		Adgrl3	FB-M2
Ahnak	FB-M1	#B33E52	0.284967	-0.0893714	0.250952	-0.0345604	0.0600942	-0.117646	-0.172443	0.0353429	0.135288		Kcnip1	FB-M2
Ahnak2	FB-M1	#B33E52	0.320213	-0.149881	0.114413	-0.0381557	0.0500704	-0.121438	-0.121056	0.0614463	0.0943022		Fap	FB-M2
Aig1	FB-M1	#B33E52	0.181196	-0.0826041	0.0115912	0.045735	0.0558519	-0.0344019	0.000163408	0.0902787	0.0812098		Itpr1	FB-M2
Akap13	FB-M1	#B33E52	0.298501	-0.035921	-0.00364305	0.0561351	0.133521	-0.0333568	0.0450254	0.239099	0.215186		Gpc6	FB-M2
Amotl1	FB-M1	#B33E52	0.110228	-0.0134485	0.0643443	-0.00653	0.0523543	-0.0395917	-0.0348713	0.0510312	0.0881262		Rora	FB-M2
Ankrd6	FB-M1	#B33E52	0.135261	-0.032845	0.0494311	-0.023796	0.00121246	-0.0663302	-0.0470409	0.0160615	0.0417926		Mast4	FB-M2
Anks1	FB-M1	#B33E52	0.122668	-0.056627	0.0746591	0.00224666	0.00197224	-0.0407788	-0.071373	0.00556937	0.0398815		Ror1	FB-M2
Ano6	FB-M1	#B33E52	0.138787	0.0316599	0.0547757	-0.0041887	0.0497256	0.00714974	-0.00156612	0.0914995	0.135625		Rgs7	FB-M2
Antxr1	FB-M1	#B33E52	0.262744	-0.0327357	0.108752	-0.0467964	0.101957	-0.0136913	-0.107718	0.134332	0.156274		Adap2	FB-M2
Anxa1	FB-M1	#B33E52	0.162032	-0.0440467	0.00660875	0.0012357	0.0495383	0.012335	-0.000470093	0.099096	0.0932858		Dlc1	FB-M2
Anxa2	FB-M1	#B33E52	0.232029	-0.0705848	0.0599808	-0.027767	0.0618563	-0.0754497	-0.0535364	0.0871797	0.102115		Tnik	FB-M2
Anxa3	FB-M1	#B33E52	0.216776	-0.0612451	-0.00572849	0.0192201	-0.0329064	0.132809	0.0359926	0.072542	0.11668		Lama2	FB-M2
Anxa4	FB-M1	#B33E52	0.0984313	-0.0446209	0.0249368	0.0111839	0.0413177	-0.0489603	-0.0269753	0.0373059	0.0519458		Prex2	FB-M2
Ap2a2	FB-M1	#B33E52	0.135906	-0.0192044	0.0589875	-0.0138443	0.0128895	-0.0398721	-0.0538999	0.0402109	0.0684912		Necab1	FB-M2
Apba1	FB-M1	#B33E52	0.231375	-0.0812344	0.0651096	-0.0239363	0.0791054	-0.0608923	-0.0700503	0.103362	0.124043		Plxdc2	FB-M2
Arap1	FB-M1	#B33E52	0.0804934	-0.0313114	0.0127085	-0.00794337	0.0212256	-0.0259229	-0.0112755	0.0217155	0.0259573		Lhfp	FB-M2
Arfgap3	FB-M1	#B33E52	0.132936	-0.030668	0.0589381	-0.0340697	0.00382947	-0.036553	-0.0441905	0.0223073	0.073592		Ssh2	FB-M2
Arhgap17	FB-M1	#B33E52	0.107873	0.0021112	0.0192127	0.0189651	0.0311488	-0.0118209	0.0124812	0.0579201	0.0992477		Mrvi1	FB-M2
Arhgap22	FB-M1	#B33E52	0.238622	-0.0724346	0.0907353	-0.0288623	-0.0274979	-0.0983618	-0.0915504	0.0365696	0.0711379		Tcf4	FB-M2
Arhgap23	FB-M1	#B33E52	0.145196	-0.0187878	0.066887	-0.0471632	0.00748544	-0.0222801	-0.05651	0.0240873	0.0738941		Apba2	FB-M2
Arhgef28	FB-M1	#B33E52	0.307204	-0.220112	0.048646	3.14e-06	0.0587618	-0.0191833	-0.0870894	0.100331	0.0760172		Gpm6b	FB-M2
Arhgef3	FB-M1	#B33E52	0.190243	-0.0713204	0.0829674	-0.0216202	0.001639	0.0465843	-0.0941732	0.0476158	0.0997568		Rbfox1	FB-M2
Arl15	FB-M1	#B33E52	0.153035	0.0822183	0.0301969	-0.00597017	0.0280237	-0.0158335	-0.000240536	0.0901759	0.153611		Cyth3	FB-M2
Arl6ip5	FB-M1	#B33E52	0.100728	-0.0218618	0.0271286	0.0185108	0.0273269	-0.0324747	-0.0204476	0.0557927	0.0776801		Dock10	FB-M2
Arrb1	FB-M1	#B33E52	0.109096	-0.00425235	0.0690576	-0.0011945	0.055914	-0.0276645	-0.0380144	0.0468538	0.0801538		Cmss1	FB-M3
Asap2	FB-M1	#B33E52	0.252105	-0.127362	0.0816274	0.0172412	0.0858072	-0.0971769	-0.0618945	0.109145	0.113734		Camk1d	FB-M3
Aspn	FB-M1	#B33E52	0.221023	-0.0122313	0.0389552	0.0219411	0.11953	-0.0761446	-0.0197151	0.136559	0.131618		Il31ra	FB-M3
Atg7	FB-M1	#B33E52	0.10705	-0.0140734	0.0482523	-0.00683695	0.0286354	-0.0309195	-0.0255331	0.0449832	0.0676435		Hexb	FB-M3
Atl3	FB-M1	#B33E52	0.096911	-0.00577577	0.0570122	-0.0028338	0.0269491	-0.00163481	-0.0424765	0.0340405	0.078412		Lars2	FB-M3
Atp10a	FB-M1	#B33E52	0.213039	-0.0346867	0.0216733	0.0112391	0.0869687	-0.0468671	-0.00506258	0.126733	0.131585		Mb	FB-M3
Atp9a	FB-M1	#B33E52	0.143458	-0.0441958	0.0623601	-0.0264055	0.0252562	-0.0757628	-0.0703659	0.0152312	0.0471971		Actc1	FB-M3
Aven	FB-M1	#B33E52	0.0836645	0.00324477	0.0514913	-0.0112892	0.008248	-0.0213661	-0.0363641	0.0270339	0.0664204		Myl3	FB-M3
Axl	FB-M1	#B33E52	0.408511	-0.174492	0.116401	-0.0392839	0.0165038	-0.128293	-0.0991541	0.0872823	0.131348		Tpm1	FB-M3
B4galt5	FB-M1	#B33E52	0.127588	-0.0252053	0.044263	-0.0230927	0.00717443	-0.098576	-0.0402948	0.0265609	0.0655729		Gphn	FB-M3
Baz1a	FB-M1	#B33E52	0.0834763	-0.0309573	0.0368102	-0.000858592	-0.0174581	-0.0232839	-0.0257942	-0.0021918	0.0527076		Cdk8	FB-M3
Bcat1	FB-M1	#B33E52	0.104452	-0.0299056	0.037975	-0.0194844	0.00136377	-0.026353	-0.0377707	0.0321155	0.0751872		Slc25a4	FB-M3
Bcl7c	FB-M1	#B33E52	0.0517938	0.0141925	0.0205026	-0.0239053	-0.00968307	-0.0218245	-0.0113413	0.0149069	0.035498		Tmem56	FB-M3
Bcr	FB-M1	#B33E52	0.163617	-0.0358341	0.060347	-0.0296513	0.0450797	-0.0699365	-0.0567351	0.0723664	0.0848357		Peak1	FB-M3
Bean1	FB-M1	#B33E52	0.093327	0.0304438	0.037751	-0.00358137	0.0119757	-0.0163861	0.00391973	0.0329891	0.0665638		Ckm	FB-M3
Bin1	FB-M1	#B33E52	0.150158	-0.0547604	0.0655518	-0.0156077	0.0247996	-0.0297263	-0.0512002	0.0394223	0.0632908		Cox6a2	FB-M3
Bmp1	FB-M1	#B33E52	0.172921	-0.0635944	0.104125	-0.023321	0.0145816	-0.0721158	-0.0834939	0.00931157	0.0587432		Tnnc1	FB-M3
Bmp2k	FB-M1	#B33E52	0.109942	0.0263217	0.0631854	0.00431629	0.032919	-0.0033517	-0.00968808	0.0638718	0.103381		Atp5b	FB-M3
Bnc2	FB-M1	#B33E52	0.218558	0.00625673	0.00994117	-0.0118938	0.0982015	-0.0325787	-0.00289827	0.135421	0.126793		Des	FB-M3
Btbd9	FB-M1	#B33E52	0.109381	-0.0142143	0.04118	0.022929	0.0512613	-0.0324662	-0.0135923	0.0613959	0.0863305		Uqcr11	FB-M3
C1qtnf7	FB-M1	#B33E52	0.200542	0.054848	0.0452786	-0.0252441	0.0499368	-0.0102414	-0.0259079	0.119742	0.137617		Hsp90ab1	FB-M3
C77080	FB-M1	#B33E52	0.115989	-0.0417784	0.0739689	-0.0306553	0.0166689	-0.0283882	-0.0702674	0.00869185	0.0386935		Cox7c	FB-M3
Capn2	FB-M1	#B33E52	0.169307	-0.0094776	0.0856492	-0.0358509	0.0222232	-0.0575481	-0.0599694	0.0533065	0.0966904		Taco1	FB-M3
Cast	FB-M1	#B33E52	0.142777	-0.0129907	0.0129016	0.0400906	0.0369457	-0.00254974	0.0165954	0.0954294	0.107898		Atp5f1	FB-M3
Cbx5	FB-M1	#B33E52	0.127448	-0.0232376	0.0436099	0.0154258	0.0626898	-0.0295925	-0.0281994	0.0728328	0.101371		Osbpl5	FB-M3
Ccdc6	FB-M1	#B33E52	0.135638	-0.0145224	0.0593608	-0.00695464	0.0303807	-0.0286783	-0.0346206	0.0541032	0.0939586		Pcdh7	FB-M4
Ccdc66	FB-M1	#B33E52	0.0722678	0.00665414	0.052472	-0.00504448	0.0352458	-0.0106319	-0.0293823	0.0420258	0.0739659		Ralgapa2	FB-M4
Cd34	FB-M1	#B33E52	0.35355	-0.143065	0.104727	-0.0248214	0.0548025	-0.1527	-0.106977	0.128071	0.127613		Cpeb3	FB-M4
Cd55	FB-M1	#B33E52	0.383159	-0.184705	0.0673885	-0.0347538	0.0438952	-0.110426	-0.0966696	0.130074	0.126481		Mitf	FB-M4
Cd9	FB-M1	#B33E52	0.204251	-0.118716	0.0571179	0.00736585	0.0894581	-0.105378	-0.0409631	0.0850543	0.0722771		Qk	FB-M4
Cdc42bpb	FB-M1	#B33E52	0.107259	0.00697984	0.0627197	-0.00673564	0.0247952	-0.0116043	-0.0198042	0.0440099	0.0879578		Tbc1d4	FB-M4
Cdc42ep2	FB-M1	#B33E52	0.107484	-0.0415256	0.0679817	-0.0544991	-0.0255088	-0.0604014	-0.0784943	-0.0121695	0.025823		Thrb	FB-M4
Cdr2l	FB-M1	#B33E52	0.0829844	-0.0129166	0.06591	-0.0211277	0.0210211	-0.0369691	-0.0499162	0.0155409	0.0508246		Tacc2	FB-M4
Cdv3	FB-M1	#B33E52	0.0715543	-0.0258354	0.0470317	-0.0128218	0.00528776	-0.0272122	-0.0249712	0.00778096	0.0429368		Camta1	FB-M4
Cep170	FB-M1	#B33E52	0.19845	0.0148869	-0.0205112	0.0344874	0.0326998	-0.0336142	0.0517634	0.14691	0.165187		Immp2l	FB-M4
Cers6	FB-M1	#B33E52	0.134503	0.00525144	0.00985242	0.0087703	0.0305269	0.028655	0.00814636	0.0857159	0.107899		Phactr2	FB-M4
Chfr	FB-M1	#B33E52	0.113384	-0.000690478	0.0426157	0.00442427	0.0377953	-0.00521423	-0.0190618	0.0656604	0.106066		Ctnna1	FB-M4
Chn2	FB-M1	#B33E52	0.139244	-0.0671018	0.0831243	-0.0115109	0.0741319	-0.0736979	-0.0578518	0.0520516	0.0671301		Chchd3	FB-M4
Chrd	FB-M1	#B33E52	0.0967627	-0.0321247	0.0503616	-0.0287471	-0.0286816	-0.00943617	-0.0449957	-0.0132811	0.0315045		Ddx5	FB-M4
Chst11	FB-M1	#B33E52	0.101366	-0.0847114	0.0263682	0.017469	0.0991995	-0.041495	-0.0353499	0.0465325	0.0586089		Dip2c	FB-M4
Clec3b	FB-M1	#B33E52	0.168894	-0.0456601	0.00931895	-0.0495435	-0.0345388	-0.0530008	-0.0562522	0.0387028	0.029854		Kidins220	FB-M4
Clic1	FB-M1	#B33E52	0.084789	-0.0406605	0.0415719	-0.00842883	0.00632897	-0.0347954	-0.0315269	0.0174885	0.0440213		Neo1	FB-M4
Clip2	FB-M1	#B33E52	0.156764	0.00706785	0.0949369	-0.0221373	0.0300909	-0.0523352	-0.0579186	0.0368781	0.110187		Lrrfip2	FB-M4
Cltb	FB-M1	#B33E52	0.0821361	-0.0317127	0.0455911	-0.0206486	-0.00159781	-0.0251727	-0.0381016	0.00346852	0.0245696		Fgfr2	FB-M4
Cmip	FB-M1	#B33E52	0.214318	-0.0248746	0.0871301	-0.0403387	0.0388177	-0.0718395	-0.0776459	0.0552138	0.0994307		Clasp1	FB-M4
Cmtm7	FB-M1	#B33E52	0.111237	-0.00546349	0.0355121	-0.0113927	0.0265532	-0.0317038	-0.0224408	0.0554358	0.0620944		Slc4a4	FB-M4
Coro2b	FB-M1	#B33E52	0.124644	-0.0322729	0.0451081	-0.0232094	-0.0170922	-0.000108748	-0.0374254	0.0153556	0.0385647		Nfyc	FB-M4
Cpeb1	FB-M1	#B33E52	0.143265	0.0496639	0.0420336	0.0432727	0.0442238	-0.0573426	-0.00261416	0.0769323	0.131144		Mical3	FB-M4
Cpne2	FB-M1	#B33E52	0.0754986	-0.000172521	0.0322188	-0.0357748	-0.011134	-0.0384881	-0.0530373	0.00515081	0.0281702		Vwa8	FB-M4
Creb5	FB-M1	#B33E52	0.399	-0.1098	0.0496499	-0.0376469	-0.0135256	-0.0457082	-0.0706087	0.10486	0.136449		Magi2	FB-M4
Crip1	FB-M1	#B33E52	0.132383	-0.117361	0.0175905	0.000243737	0.00775823	-0.0813028	-0.052827	0.000632951	-0.0196097		Col4a6	FB-M5
Crtc1	FB-M1	#B33E52	0.0683501	-0.0341004	0.0508227	-0.0172725	0.02679	-0.00916244	-0.0420938	0.0224036	0.0337801		Cfh	FB-M5
Ctif	FB-M1	#B33E52	0.146812	0.0138065	0.0910294	-0.0287417	0.0266834	-0.04054	-0.0577449	0.0299117	0.100759		Adamts6	FB-M5
Cxxc5	FB-M1	#B33E52	0.156213	-0.0860532	0.0843179	-0.042726	-0.00543909	-0.0489513	-0.08855	0.0064203	0.0392357		Plce1	FB-M5
Cyfip1	FB-M1	#B33E52	0.143884	-0.0107021	0.0517624	0.016277	0.0462152	-0.00347072	-0.0131514	0.0809814	0.123631		Myo1d	FB-M5
Dagla	FB-M1	#B33E52	0.128254	-0.00776594	0.0612139	-0.0254645	0.0282321	-0.0611013	-0.0405369	0.0219847	0.0610651		Mfap4	FB-M5
Dap	FB-M1	#B33E52	0.118081	-0.0335267	0.0565409	-0.0173081	0.0310629	-0.0385252	-0.0535778	0.044056	0.0689713		Col4a5	FB-M5
Dbn1	FB-M1	#B33E52	0.231968	-0.097005	0.0674584	-0.0391191	0.012709	-0.0810167	-0.0775969	0.0254671	0.0546254		Setbp1	FB-M5
Dcbld2	FB-M1	#B33E52	0.196715	0.0220739	0.0243637	0.0107884	0.0472236	-0.0485028	0.0180027	0.132352	0.14472		Adamtsl2	FB-M5
Dclk1	FB-M1	#B33E52	0.206632	-0.00109176	0.00867928	-0.00374734	0.061368	-0.0986354	-0.0221175	0.125529	0.138804		Cdh11	FB-M5
Ddr2	FB-M1	#B33E52	0.206276	0.0279091	0.040323	-0.00109698	0.0237446	-0.0215752	-0.00734636	0.136428	0.165718		Pdzrn3	FB-M5
Diaph1	FB-M1	#B33E52	0.231818	-0.0943156	0.056444	-0.00337723	0.021624	-0.0666824	-0.0522509	0.0786926	0.0983415		Tanc2	FB-M5
Disp1	FB-M1	#B33E52	0.177352	0.0104605	0.0386338	-0.019595	0.0429315	-0.0351086	-0.0265116	0.0955187	0.110954		Pmepa1	FB-M5
Dlg4	FB-M1	#B33E52	0.113952	-0.00192872	0.0537829	-0.0380621	0.00688708	-0.00205488	-0.0353053	0.0327564	0.0795272		Abi3bp	FB-M5
Dlgap4	FB-M1	#B33E52	0.150981	-0.058345	0.081342	-0.0193056	-0.00343763	-0.0260865	-0.0617145	-0.00442301	0.0671025		Tmcc3	FB-M5
Dnm1	FB-M1	#B33E52	0.324699	-0.123184	0.152984	-0.053493	0.0448215	-0.117955	-0.156853	0.0701275	0.115039		Ccdc80	FB-M5
Dock1	FB-M1	#B33E52	0.129305	0.0695657	0.0457146	0.0289199	0.0555958	-0.00251885	0.0117617	0.124676	0.160588		Tiam2	FB-M5
Dock11	FB-M1	#B33E52	0.185476	0.00480762	0.0244028	-0.00743638	0.0610508	-0.0387619	0.0035493	0.12936	0.142426		Lhfpl2	FB-M5
Dock7	FB-M1	#B33E52	0.158433	0.0303877	0.0316084	0.00749181	0.0903025	0.000237966	0.017352	0.163762	0.169581		Unc5c	FB-M5
Dpp4	FB-M1	#B33E52	0.354589	-0.201878	0.0484295	-0.0350825	-0.0183085	-0.0771672	-0.115203	0.077397	0.064914		Socs2	FB-M5
Dpysl2	FB-M1	#B33E52	0.162795	0.0117448	0.0772432	-0.0285333	0.0713865	-0.0269805	-0.0666483	0.0792193	0.10774		Syne1	FB-M5
Dpysl3	FB-M1	#B33E52	0.18888	-0.0551179	-0.00390171	0.0385979	0.138389	0.00129215	0.0306852	0.161864	0.137496		Sipa1l1	FB-M5
Dsel	FB-M1	#B33E52	0.0968865	-0.00892204	0.0675647	-0.00246474	0.0369851	-0.00578335	-0.0405617	0.0391624	0.0900404		Sertad4	FB-M5
Dst	FB-M1	#B33E52	0.185798	-0.0268987	0.0604638	0.100015	0.111645	0.009536	-0.00221493	0.139254	0.169096		Rabgap1l	FB-M5
Dtx2	FB-M1	#B33E52	0.10335	-0.0267989	0.0597872	-0.034738	0.00152621	-0.0214561	-0.0536149	0.0116756	0.0475883		Nhs	FB-M5
Ebf1	FB-M1	#B33E52	0.265561	0.00736198	-0.045794	0.00312027	0.0162422	0.0347389	0.0227054	0.178511	0.151309		Nkain2	FB-M6
Ebf2	FB-M1	#B33E52	0.259901	-0.00140663	0.0342653	-0.0367862	0.0218208	0.00471985	-0.0302079	0.160497	0.143873		Thsd7a	FB-M6
Ecm1	FB-M1	#B33E52	0.154616	-0.124445	0.0110205	0.0173969	0.0394719	-0.0300397	-0.0150393	0.0527003	0.0402676		Slit3	FB-M6
Efcc1	FB-M1	#B33E52	0.12742	0.0248721	0.121922	-0.0575621	0.0186687	-0.0768697	-0.0977789	0.0402992	0.0807936		Arhgap24	FB-M6
Efemp1	FB-M1	#B33E52	0.153162	-0.103021	-0.0185358	0.0241769	-0.0288345	0.059539	-0.00347652	0.0380942	0.0408952		Dpep1	FB-M6
Elf1	FB-M1	#B33E52	0.156914	-0.0407497	0.0510433	-0.0167889	0.0137657	0.0139936	-0.0380665	0.0550707	0.101421		Acss3	FB-M6
Elf4	FB-M1	#B33E52	0.184616	-0.0681151	0.0758384	-0.0327245	0.000276003	-0.0676809	-0.0831764	0.0226666	0.0578452		Aldh1a1	FB-M6
Emp1	FB-M1	#B33E52	0.225071	-0.0371953	0.102819	-0.0110352	0.112691	-0.104041	-0.0949484	0.103917	0.126314		Fmo2	FB-M6
Epn2	FB-M1	#B33E52	0.142971	-0.0159064	0.0520839	0.00295389	0.0326693	-0.0110441	-0.0360706	0.0635994	0.112034		Angpt1	FB-M6
Ext1	FB-M1	#B33E52	0.158229	0.0991258	-0.0229081	0.014718	0.0306302	-0.0463641	0.0666195	0.152799	0.1608		Pid1	FB-M6
Fam102b	FB-M1	#B33E52	0.150437	-0.00234832	0.0456561	-0.00788155	0.0545468	0.00442274	-0.0305833	0.0980104	0.109801		Dapk1	FB-M6
Fam126a	FB-M1	#B33E52	0.146276	-0.0851035	0.054621	0.0720551	0.0314298	-0.048723	-0.0348415	0.048972	0.0746231		Spon1	FB-M6
Fam20c	FB-M1	#B33E52	0.157791	-0.0666985	0.053745	-0.0264789	0.0254179	-0.0433326	-0.0587829	0.0508022	0.0598402		Lvrn	FB-M6
Fam222b	FB-M1	#B33E52	0.12138	-0.00908571	0.0383126	-0.0102452	0.0144804	-0.014627	-0.0224227	0.0533333	0.0887526		Pdlim3	FB-M6
Farp1	FB-M1	#B33E52	0.158129	0.0598377	0.0589238	-0.0165797	0.0736469	-0.0501152	-0.0180775	0.100402	0.133797		Dpyd	FB-M6
Fbln2	FB-M1	#B33E52	0.371552	-0.153332	0.124609	-0.00724908	0.0503172	-0.132787	-0.112511	0.0809803	0.130279		Man2a1	FB-M6
Fbn1	FB-M1	#B33E52	0.311201	-0.0646524	-0.051655	0.0246316	0.0907877	0.0368274	0.0725422	0.194537	0.186522		Ccbe1	FB-M6
Fgf2	FB-M1	#B33E52	0.182145	-0.0828383	0.0603631	0.0150103	0.0734626	-0.0307464	-0.0473076	0.0891008	0.10721		Eya2	FB-M6
Fgfr1	FB-M1	#B33E52	0.214104	-0.0255061	0.0970768	-0.0556917	0.030564	-0.0179795	-0.0856467	0.0636659	0.104645		Vgll3	FB-M6
Flnb	FB-M1	#B33E52	0.312259	-0.191732	0.0736285	-0.0352045	0.0344811	-0.117216	-0.109408	0.0822344	0.0756984		Ccn5	FB-M6
Flrt2	FB-M1	#B33E52	0.244569	-0.118659	0.0385362	0.00267174	0.0894488	-0.0459594	-0.0656306	0.120334	0.0932244		Ifi205	FB-M6
Fmnl2	FB-M1	#B33E52	0.175521	0.0237295	0.00856461	0.0276744	0.0966323	-0.0675769	0.04567	0.13625	0.141214		Pappa	FB-M6
Fn1	FB-M1	#B33E52	0.178128	-0.0889035	0.0364842	-0.0377769	0.0226133	-0.025877	-0.0607475	0.0463775	0.0477725		Fkbp5	FB-M6
Foxo1	FB-M1	#B33E52	0.116405	-0.00366809	0.0314922	0.0239549	0.0338012	0.0538677	-0.0012549	0.0673372	0.0984029		Fbn2	FB-M6
Fsd1l	FB-M1	#B33E52	0.154393	-0.0626406	0.0347868	0.0432173	0.0179879	-0.0482968	-0.0215468	0.0756006	0.0862936		Tmtc1	FB-M6
Fstl1	FB-M1	#B33E52	0.384951	-0.109132	0.0363781	-0.00843367	0.103882	-0.0954967	-0.0290969	0.155507	0.168144		Egr1	FB-M7
Fyn	FB-M1	#B33E52	0.258226	-0.024083	0.0551351	-0.00814272	0.0119297	-0.0583216	-0.0308735	0.0940803	0.128521		Errfi1	FB-M7
Gab2	FB-M1	#B33E52	0.248946	0.0413634	0.0342698	0.0163655	0.163476	-0.0944797	0.0200811	0.225259	0.220854		Ccn1	FB-M7
Galnt16	FB-M1	#B33E52	0.271497	-0.124863	0.077254	-0.0532124	-0.0265131	0.0218674	-0.126633	0.0249901	0.0638377		Nr4a1	FB-M7
Galnt17	FB-M1	#B33E52	0.211345	-0.0447423	0.0356443	-0.0134739	0.0940163	-0.0539886	-0.0314051	0.12616	0.103685		Thbs1	FB-M7
Gan	FB-M1	#B33E52	0.0950282	-0.0123142	0.0418161	-0.0212725	-0.00220478	-0.0197578	-0.0345831	0.0100085	0.0405335		Btg2	FB-M7
Gars	FB-M1	#B33E52	0.0794153	-0.0148243	0.0589486	-0.017774	-0.00769143	-0.0301044	-0.0356036	0.00407579	0.059094		Pde4b	FB-M7
Gas7	FB-M1	#B33E52	0.358093	-0.18374	0.0726879	-0.00967259	0.125737	-0.141688	-0.0764164	0.151905	0.132659		Nr4a3	FB-M7
Gatad2a	FB-M1	#B33E52	0.0911556	-0.0127556	0.0552334	-0.0138008	2.26e-05	-0.0262194	-0.028758	0.0155288	0.0730992		Ier2	FB-M7
Gda	FB-M1	#B33E52	0.27281	-0.152044	0.0163427	-0.00628854	0.00548304	-0.0530019	-0.0480232	0.098987	0.085991		Junb	FB-M7
Gfpt2	FB-M1	#B33E52	0.453857	-0.272801	-0.0218783	0.0195978	0.0447817	-0.163501	0.0163021	0.171197	0.129401		Actb	FB-M7
Gli2	FB-M1	#B33E52	0.116292	0.0230689	0.0753962	-0.0228746	0.120659	-0.0241186	-0.0458705	0.0923826	0.114491		Cp	FB-M7
Glud1	FB-M1	#B33E52	0.141405	-0.0275898	0.0245076	0.0103894	0.0251381	-0.0291457	-0.00719401	0.0624309	0.088162		Vcl	FB-M7
Gnao1	FB-M1	#B33E52	0.197433	0.00399594	0.110662	-0.0426929	0.0520139	-0.0176947	-0.0735974	0.0744082	0.119052		Filip1l	FB-M7
Gnb1	FB-M1	#B33E52	0.136764	-0.00201301	0.0433957	0.0157171	0.0377513	0.00171176	-0.000115369	0.0888917	0.133738		Actg1	FB-M7
Gne	FB-M1	#B33E52	0.0797815	-0.0237824	0.0471755	-0.0136856	0.0228199	-0.0234619	-0.0526024	0.0364431	0.0594095		Klf9	FB-M7
Gprc5b	FB-M1	#B33E52	0.119695	-0.068895	0.0462169	-0.00186116	0.0178206	-0.0362281	-0.0493834	0.021801	0.0330403		Zfp36	FB-M7
Grk5	FB-M1	#B33E52	0.196974	0.00775815	-0.00322253	0.0237778	0.0914735	-0.0281923	0.0452622	0.150381	0.150794		Rhoj	FB-M7
Gxylt2	FB-M1	#B33E52	0.161434	0.00749785	0.0563667	-0.00546986	0.0981283	0.0150806	-0.0321541	0.101169	0.111461		Actr3	FB-M7
Heg1	FB-M1	#B33E52	0.280911	-0.0286608	0.0674166	-0.0138044	-0.0295171	0.0449507	-0.0274287	0.0651877	0.151565		Rbpms	FB-M7
Herc2	FB-M1	#B33E52	0.120669	0.0261609	0.06187	0.00655615	0.0465625	-0.00840516	-0.0249838	0.071165	0.126772		Syn3	FB-M7
Hhipl1	FB-M1	#B33E52	0.183012	-0.0411931	0.0995731	-0.0277656	0.0242364	-0.0702537	-0.105805	0.0134453	0.0647411		Myh9	FB-M7
Hip1	FB-M1	#B33E52	0.157788	-0.00326744	0.108266	-0.0508722	0.0567285	-0.0617668	-0.0886177	0.0510534	0.0996013		Dusp1	FB-M7
Hivep2	FB-M1	#B33E52	0.233151	-0.00315721	0.0122913	0.0150297	0.00594083	-0.0142607	0.0196812	0.116597	0.163744		Vmp1	FB-M7
Hmcn2	FB-M1	#B33E52	0.318728	-0.0336188	0.163936	-0.0757046	0.0172879	-0.177354	-0.165168	0.0362028	0.0923304		Slc8a1	FB-M7
Hs3st1	FB-M1	#B33E52	0.212112	-0.0790875	0.0376989	-0.0265988	0.025134	-0.0644146	-0.0434204	0.0675279	0.0586363		Kcnt2	FB-M8
Ifi27l2a	FB-M1	#B33E52	0.0923614	-0.0543283	0.023695	-0.0252056	-0.00484104	-0.0811033	-0.0618522	0.00320746	0.000596412		Zbtb20	FB-M8
Igdcc4	FB-M1	#B33E52	0.140475	-0.0707724	0.0349424	-0.0128289	0.0527424	-0.070745	-0.0466285	0.057532	0.0529141		Zfpm2	FB-M8
Il16	FB-M1	#B33E52	0.202329	0.00333654	0.0897418	-0.00845325	0.108002	-0.140636	-0.057358	0.118313	0.134056		Foxp2	FB-M8
Il17rd	FB-M1	#B33E52	0.164655	-0.0109568	0.0751665	-0.02321	0.0455283	-0.074952	-0.0645868	0.0657973	0.087014		Akt3	FB-M8
Il6ra	FB-M1	#B33E52	0.160061	-0.0657465	0.0394685	-0.0219528	-0.03724	0.0340211	-0.0319106	0.0311044	0.055572		Trps1	FB-M8
Inpp4b	FB-M1	#B33E52	0.228481	-0.0746674	0.0876928	0.053814	0.156829	-0.159852	-0.079206	0.159583	0.123341		Pard3b	FB-M8
Ints3	FB-M1	#B33E52	0.0873384	-0.00831522	0.0361797	-0.0125261	0.0169006	-0.0201835	-0.0358831	0.0405259	0.0666693		Psd3	FB-M8
Iqgap1	FB-M1	#B33E52	0.194538	-0.0488585	0.0805081	-0.00258193	0.0473613	-0.0790344	-0.0689169	0.0624219	0.109409		Tcf12	FB-M8
Iqsec1	FB-M1	#B33E52	0.169235	-0.104004	0.0650939	0.0232875	0.0218131	-0.0654087	-0.0731574	0.0167286	0.0500678		Naaladl2	FB-M8
Irak3	FB-M1	#B33E52	0.197652	-0.0675143	0.0484973	-0.00392089	0.00327449	-0.00762084	-0.0333555	0.0641713	0.100358		Cped1	FB-M8
Islr	FB-M1	#B33E52	0.098232	-0.0416099	-0.0115996	0.0273558	0.0181595	-0.0126665	0.0145959	0.0639657	0.0361984		Adamts12	FB-M8
Itga11	FB-M1	#B33E52	0.0979194	-0.0101303	0.0552337	-0.0200671	0.0577001	-0.0135745	-0.0343589	0.0520334	0.0657316		Pam	FB-M8
Itga9	FB-M1	#B33E52	0.254907	-0.0551073	0.0958122	0.00934879	0.104221	0.00984108	-0.0649315	0.0944378	0.139705		Tenm3	FB-M8
Itsn1	FB-M1	#B33E52	0.13448	0.0159388	0.0603488	0.00553342	0.053664	-0.0052948	-0.0165683	0.0881095	0.119456		Agmo	FB-M8
Jag1	FB-M1	#B33E52	0.100872	-0.00415441	0.0517118	-0.0106246	-0.00464277	0.00850715	-0.0269974	0.0219141	0.0624877		Col5a2	FB-M8
Jcad	FB-M1	#B33E52	0.10148	-0.0194275	0.0757698	-0.0164886	0.00940308	-0.0204442	-0.0635944	0.0137479	0.0593362		Raph1	FB-M8
Kazn	FB-M1	#B33E52	0.103783	-0.0338205	0.0443085	-0.0245617	-0.00414431	0.0232986	-0.0477871	0.0145801	0.0466449		Klf12	FB-M8
Kcp	FB-M1	#B33E52	0.218637	-0.0504961	0.0787161	-0.0376276	-0.0184062	-0.113948	-0.0741917	0.0412523	0.0707582		Lpp	FB-M8
Kctd9	FB-M1	#B33E52	0.211621	-0.0792363	0.0509804	-0.00609611	0.0179681	-0.0785376	-0.0436833	0.0691012	0.089566		B3galt1	FB-M8
Kif13b	FB-M1	#B33E52	0.190607	0.0340683	0.0355046	-0.0105137	0.0556394	0.00760269	-0.011776	0.131815	0.161544		Gls	FB-M8
Kif2a	FB-M1	#B33E52	0.128672	0.0317631	0.0365334	0.00610304	0.0155131	-0.00651861	-0.00641568	0.0698192	0.120612		Nbea	FB-M8
Kif5b	FB-M1	#B33E52	0.133039	-0.00629602	0.0248101	0.0418654	0.0336785	-0.00584927	0.0144957	0.0782785	0.112728		Zcchc7	FB-M8
Klf3	FB-M1	#B33E52	0.189365	-0.0430785	0.0295589	0.00796234	0.0273593	-0.0549736	0.0141287	0.0911199	0.105969		Stag1	FB-M8
Klf4	FB-M1	#B33E52	0.162505	-0.0880583	-0.0112359	0.00449367	0.0227135	-0.0643164	0.0230785	0.0656401	0.0426901		Robo1	FB-M8
Lamc1	FB-M1	#B33E52	0.194793	0.140923	0.00608599	-0.0224937	-0.0583001	0.00129715	0.0502569	0.115842	0.166159
Ldlrad3	FB-M1	#B33E52	0.123947	0.0159437	0.0845416	-0.0289782	0.0568774	-0.0724167	-0.0610787	0.0563555	0.0962581
Ldlrad4	FB-M1	#B33E52	0.287618	-0.0141667	0.0604763	0.0184613	0.181833	-0.108226	-0.0426685	0.182175	0.176429
Lgals9	FB-M1	#B33E52	0.0873593	-0.0171925	0.0632115	-0.0625799	-0.00410091	-0.034184	-0.0708724	0.0023247	0.0257952
Lims2	FB-M1	#B33E52	0.290506	-0.139181	0.0903657	-0.0495971	-0.0483858	-0.0869433	-0.114838	0.00605518	0.0378975
Loxl1	FB-M1	#B33E52	0.179463	-0.0484659	0.0888037	-0.077406	0.00296382	-0.0171313	-0.109251	0.0011796	0.0531211
Loxl2	FB-M1	#B33E52	0.201544	0.0154883	0.264732	0.0177593	0.0638485	-0.104405	-0.0954925	0.0700614	0.180856
Lpar1	FB-M1	#B33E52	0.184916	0.0611448	0.00445348	-0.00139831	0.0703027	0.0321068	0.0346411	0.177669	0.174959
Lrch3	FB-M1	#B33E52	0.161133	0.0111763	0.0240992	0.0139672	0.0546362	0.00924192	0.0162679	0.135673	0.157663
Lrrc8c	FB-M1	#B33E52	0.14535	-0.0352851	0.0797199	-0.00977625	0.0306867	0.000604431	-0.0510594	0.0420405	0.0833472
Lrrc8d	FB-M1	#B33E52	0.132729	0.00194097	0.0533313	-0.00311388	0.0372222	-0.0237619	-0.0217281	0.0621641	0.0952466
Lsp1	FB-M1	#B33E52	0.278756	-0.113753	0.130645	-0.0715946	0.0209596	-0.149176	-0.142769	0.0302448	0.0714365
Man1a	FB-M1	#B33E52	0.22628	-0.036483	0.00876992	0.0223611	0.00989988	0.00150458	0.00814304	0.152313	0.135777
Map1b	FB-M1	#B33E52	0.204495	-0.0825266	0.0414183	0.00896892	0.0743924	-0.0779124	-0.0332906	0.088873	0.0978726
Map3k8	FB-M1	#B33E52	0.0941118	-0.0324252	0.0379498	-0.00283405	0.00468356	-0.0314789	-0.0278725	0.0346853	0.0456849
Map4	FB-M1	#B33E52	0.154726	0.00491879	0.0360099	0.0616664	0.0339029	-0.0878426	5.77e-05	0.0801232	0.12287
Map6	FB-M1	#B33E52	0.174814	-0.0583858	0.0640476	-0.0216537	0.0545089	-0.0674353	-0.0660043	0.0501815	0.0768198
Mcu	FB-M1	#B33E52	0.234482	-0.0588524	0.0567894	-0.00980181	0.0493539	-0.0782214	-0.051991	0.103338	0.112687
Medag	FB-M1	#B33E52	0.223804	-0.000918176	0.0341004	-0.00398257	0.0703616	-0.0423256	0.000664513	0.121239	0.139701
Meox2	FB-M1	#B33E52	0.150381	-0.0424332	0.158241	0.0495774	0.102289	-0.0396437	-0.0572905	0.0996367	0.148869
Mfap5	FB-M1	#B33E52	0.450839	-0.167396	0.0788345	-0.0282258	0.0887357	-0.160389	-0.0960846	0.152595	0.141665
Mgll	FB-M1	#B33E52	0.146414	-0.0884637	0.0898686	-0.00368828	0.017363	-0.0856148	-0.0934174	0.00237512	0.0307418
Mical2	FB-M1	#B33E52	0.212796	-0.0707647	0.0407448	0.0451415	0.144486	-0.137899	-0.0124692	0.099034	0.10633
Micu1	FB-M1	#B33E52	0.220699	-0.0367718	0.0820178	-0.0512177	0.0313112	-0.0640922	-0.0826577	0.0702036	0.121194
Mmp28	FB-M1	#B33E52	0.116138	-0.0593582	0.0360679	0.00168768	0.0533975	-0.0449944	-0.0461087	0.0482461	0.0514548
Mprip	FB-M1	#B33E52	0.12138	0.0139662	0.0553768	0.0121869	0.0349029	-0.047806	-0.013785	0.052214	0.104238
Mst1r	FB-M1	#B33E52	0.104608	-0.0315081	0.0503626	-0.0240449	0.0192907	-0.0316573	-0.0539388	0.0163176	0.0381903
Mtcl1	FB-M1	#B33E52	0.186559	-0.0816987	0.045402	-0.0069932	-0.0220528	-0.0682388	-0.051718	0.0234109	0.0497235
Mtmr11	FB-M1	#B33E52	0.0848243	-0.0306931	0.0532179	-0.0160126	0.0221634	-0.0331048	-0.0387898	0.0172673	0.0361439
Mtor	FB-M1	#B33E52	0.0885697	-0.0173189	0.0460276	0.0149045	0.0330102	-0.0128115	-0.0180153	0.0321994	0.0696713
Mturn	FB-M1	#B33E52	0.102258	-0.00283804	0.0794978	-0.0366693	0.00430447	-0.00211709	-0.0645639	0.0169123	0.0564692
Myh10	FB-M1	#B33E52	0.165997	-0.0640527	0.0609172	-0.00545815	0.0546772	-0.029435	-0.07067	0.0725225	0.0935067
Myo9a	FB-M1	#B33E52	0.146323	0.0057945	-0.0059065	0.0423063	0.0902809	-0.00535035	0.0406172	0.157508	0.173542
Myof	FB-M1	#B33E52	0.199048	-0.00337401	0.0500077	0.000712017	0.0622132	-0.0336534	-0.00939988	0.122545	0.154761
Myrip	FB-M1	#B33E52	0.187114	-0.202084	0.0365955	0.0251705	0.121826	0.00416149	-0.03566	0.122938	0.0876705
Nav1	FB-M1	#B33E52	0.262717	-0.0188686	0.0658143	-0.0140317	0.0916212	-0.067423	-0.0164387	0.132021	0.147591
Ncor2	FB-M1	#B33E52	0.176468	-0.0151678	0.116339	-0.0151806	0.0743187	-0.0589229	-0.0655699	0.0476532	0.102135
Nectin1	FB-M1	#B33E52	0.181774	-0.0510961	0.0461163	-0.0420324	0.00840528	-0.0318237	-0.0350412	0.0382151	0.0655306
Nedd9	FB-M1	#B33E52	0.200163	0.022175	0.0632792	-0.0146298	0.0735235	-0.122017	-0.016281	0.108016	0.132725
Nfatc1	FB-M1	#B33E52	0.105475	-0.0359028	0.0701657	-0.00314935	0.0353978	-0.0361937	-0.0406015	0.0294683	0.0715129
Nfe2l2	FB-M1	#B33E52	0.124844	-0.0439935	0.039484	-0.00871912	-0.00987813	-0.00641395	-0.00875849	0.0296585	0.0647845
Nhsl1	FB-M1	#B33E52	0.25357	-0.125141	0.0516865	-0.0115908	-0.0104099	-0.0902236	-0.0779455	0.0449294	0.0655184
Nisch	FB-M1	#B33E52	0.109646	-0.0229297	0.0640298	0.000941251	-0.00722858	-0.00456339	-0.0394427	0.0192784	0.0691447
Nmt2	FB-M1	#B33E52	0.165048	-0.0310747	0.0409401	0.0206989	0.0331685	-0.0116497	-0.0135285	0.0760291	0.11098
Nova1	FB-M1	#B33E52	0.241744	-0.0576206	0.0205785	-0.000348719	0.00559571	-0.00821036	-0.0109493	0.121006	0.116806
Npdc1	FB-M1	#B33E52	0.107252	-0.0430968	0.0638173	-0.0281375	-0.0149155	-0.0596687	-0.0610791	-0.013075	0.0243151
Nr6a1	FB-M1	#B33E52	0.14168	-0.00548711	-0.0244805	0.0371093	0.0682485	-0.0325273	0.0141205	0.113302	0.131539
Ntn1	FB-M1	#B33E52	0.222511	-0.111536	0.0317413	0.0429804	0.105439	-0.0643532	-0.00508375	0.130253	0.112115
Ntn4	FB-M1	#B33E52	0.28593	-0.118125	0.0335808	0.00161316	0.0575544	-0.082538	-0.025365	0.113646	0.113382
Ntrk3	FB-M1	#B33E52	0.180018	-0.0579748	0.0334869	-0.0231746	0.0120209	-0.0899306	-0.0702329	0.042402	0.0474296
Numb	FB-M1	#B33E52	0.13904	0.0341466	0.023642	0.0234719	0.0465441	-0.00571164	-0.00380541	0.104988	0.143566
Numbl	FB-M1	#B33E52	0.107248	-0.030721	0.0635088	-0.0268113	0.0252913	-0.00875689	-0.0504378	0.0259193	0.0682699
Nupr1	FB-M1	#B33E52	0.0836571	-0.0553156	0.0407276	-0.0200672	0.00333567	-0.0537549	-0.0658581	-0.0133403	0.0121145
Oaf	FB-M1	#B33E52	0.152734	0.0114191	0.0407276	-0.033951	-0.0056898	-0.067409	-0.0146597	0.0383639	0.0736741
Pacs2	FB-M1	#B33E52	0.159133	-0.00697357	0.0702737	-0.00421057	0.0153263	-0.044114	-0.0494416	0.0642906	0.0962747
Pacsin2	FB-M1	#B33E52	0.13422	-0.070311	0.0559247	0.0408545	0.00782299	-0.0455728	-0.0338485	0.0233403	0.0660723
Palm	FB-M1	#B33E52	0.223092	-0.117094	0.105849	-0.0324762	0.0344711	-0.030857	-0.119108	0.0437936	0.07662
Pamr1	FB-M1	#B33E52	0.260846	-0.137243	0.0354302	0.00542076	0.0888425	-0.0566583	-0.0690952	0.106851	0.0825279
Parva	FB-M1	#B33E52	0.144918	0.0516585	0.0765438	-0.0255237	0.0289307	-0.0415776	-0.0330489	0.0668698	0.119828
Pcolce2	FB-M1	#B33E52	0.272893	-0.0863597	0.100084	-0.0254228	0.0447013	-0.0564606	-0.118798	0.0917293	0.110482
Pcsk6	FB-M1	#B33E52	0.330414	0.00694082	0.122253	-0.0847392	-0.108817	-0.0729925	-0.13328	0.0637364	0.114566
Pdcd4	FB-M1	#B33E52	0.151291	-0.00166277	0.108564	-0.0380848	0.0642995	-0.0540878	-0.0980251	0.0648467	0.104396
Pde10a	FB-M1	#B33E52	0.326583	-0.138631	0.0725304	-0.0332962	-0.00588139	-0.115991	-0.0829004	0.0697524	0.101847
Pde5a	FB-M1	#B33E52	0.0806866	0.0167081	0.0183657	0.0130779	0.0513127	-0.0260826	0.00760794	0.0675341	0.0797292
Pde8a	FB-M1	#B33E52	0.260459	-0.135783	0.035131	-0.0184667	-0.013992	-0.0468022	-0.0677526	0.0555689	0.0717257
Pde9a	FB-M1	#B33E52	0.14952	0.00082236	0.0764834	-0.0331546	0.064068	-0.0820868	-0.0608476	0.0556895	0.0897468
Pdlim1	FB-M1	#B33E52	0.137455	-0.000950287	0.0667576	-0.0185331	0.0137432	-0.0312177	-0.0246466	0.0519869	0.0864655
Pdlim7	FB-M1	#B33E52	0.13331	-0.0268675	0.0793053	-0.0326673	0.0440466	-0.0641084	-0.0451955	0.0197122	0.0706923
Pepd	FB-M1	#B33E52	0.076932	-0.00499437	0.0744166	0.00156916	0.022893	-0.0246941	-0.0468268	0.0312152	0.077171
Pi16	FB-M1	#B33E52	0.394703	-0.221139	0.0727499	-0.0380056	0.0531238	-0.192295	-0.124179	0.069276	0.0559653
Pkd1	FB-M1	#B33E52	0.145011	0.016687	0.0967204	0.00681754	0.0767795	-0.013381	-0.0282123	0.0728906	0.131796
Pknox2	FB-M1	#B33E52	0.172063	0.0213429	0.0822104	-0.0174832	0.119887	-0.0810574	-0.065516	0.11621	0.148641
Pla1a	FB-M1	#B33E52	0.268956	-0.0120253	0.0294327	-0.0213631	-0.0849529	-0.119404	0.0010063	0.0460412	0.0978568
Pla2g4a	FB-M1	#B33E52	0.198305	-0.0441156	0.0194439	0.0250874	0.126367	-0.0754087	-0.00542563	0.16221	0.13472
Platr25	FB-M1	#B33E52	0.112489	-0.0312087	0.0742342	-0.0039666	0.0631031	-0.0130639	-0.0489056	0.0538568	0.0921834
Plcxd3	FB-M1	#B33E52	0.24949	-0.158423	-0.00516138	0.0238089	0.0976871	-0.0377643	-0.0158499	0.0927649	0.0617108
Plekha2	FB-M1	#B33E52	0.0852482	0.0166203	0.0373814	0.000219911	0.0156871	0.0120721	-0.0141178	0.0409542	0.0762625
Plekha5	FB-M1	#B33E52	0.154405	0.0117887	0.0422465	-0.00617478	0.0541259	0.0378057	-0.0245436	0.126492	0.131074
Plekhg1	FB-M1	#B33E52	0.156853	0.0473748	0.0326272	0.00153257	0.0559262	-0.061349	0.014234	0.128204	0.130637
Plpp3	FB-M1	#B33E52	0.161042	-0.105593	0.012665	-0.0231155	0.0254774	0.182632	-0.0261766	0.0610433	0.0734224
Plxdc1	FB-M1	#B33E52	0.155074	-0.0665424	0.0641556	-0.00328756	0.113503	-0.105843	-0.0475397	0.0902753	0.0855423
Pmp22	FB-M1	#B33E52	0.200588	-0.0387834	-0.00276889	0.0295468	0.0881021	-0.0383839	0.0489734	0.142292	0.113386
Prep	FB-M1	#B33E52	0.0663956	-0.0224675	0.0365303	-0.000265129	0.000120842	-0.0199979	-0.0297112	2.14e-05	0.0377303
Prickle1	FB-M1	#B33E52	0.179076	-0.0939817	0.0653179	0.00825138	0.124578	-0.0834405	-0.0711806	0.0987935	0.0958657
Prkca	FB-M1	#B33E52	0.27085	-0.12509	0.046718	0.0746848	0.0946785	-0.00580046	-0.0298473	0.103763	0.143047
Ptgis	FB-M1	#B33E52	0.215008	-0.0142665	0.0542418	-0.0152904	0.0758204	-0.0228368	-0.0230417	0.0812752	0.13
Ptp4a2	FB-M1	#B33E52	0.136125	-0.0194116	0.0429592	0.0148316	0.0186911	-0.0366351	-0.00275664	0.0562859	0.110545
Ptpn12	FB-M1	#B33E52	0.156933	0.00522041	0.0128364	0.0176235	0.015987	-0.00217836	0.035779	0.0965449	0.130061
Ptpn3	FB-M1	#B33E52	0.0863067	-0.0164826	0.0565071	0.0171818	0.0523431	-0.0168014	-0.0370869	0.0515451	0.0690443
Ptprj	FB-M1	#B33E52	0.409448	-0.213044	0.0557779	-0.00209305	0.0460874	-0.125992	-0.100807	0.121098	0.133941
Ptprs	FB-M1	#B33E52	0.0986017	-0.0216907	0.0563221	0.0120763	0.0461079	-0.08239	-0.0410715	0.0248715	0.0522327
Pxn	FB-M1	#B33E52	0.126441	-0.0599291	0.0849549	-0.014501	0.00933144	-0.00984227	-0.0647274	0.00939803	0.05296
Rab11fip5	FB-M1	#B33E52	0.0833997	-0.0402183	0.0608744	0.00506698	0.012109	-0.0268744	-0.0381835	0.0153262	0.040954
Rab23	FB-M1	#B33E52	0.127252	-0.0459963	0.0324559	-0.0168245	0.0478835	-0.0496374	-0.034581	0.0500501	0.0532644
Rab30	FB-M1	#B33E52	0.135228	-0.0292647	0.0492553	0.0130715	0.0416194	-0.0236631	-0.0434321	0.0545311	0.0750718
Rab7b	FB-M1	#B33E52	0.116891	-0.00950229	0.0844855	-0.00530763	0.0368724	-0.0288989	-0.0468971	0.035032	0.072058
Radil	FB-M1	#B33E52	0.225267	-0.0715436	0.0823499	-0.0417843	0.0373433	-0.0964265	-0.0771464	0.0494132	0.0850731
Rai14	FB-M1	#B33E52	0.149537	-0.0653396	0.0245918	0.0108826	0.0768728	-0.0706121	-0.0219636	0.0863446	0.0731182
Rap1a	FB-M1	#B33E52	0.222395	-0.0426701	0.00829417	0.043882	0.0794154	-0.0577455	0.0566439	0.158139	0.177921
Rassf8	FB-M1	#B33E52	0.125469	-0.0495822	0.0526017	0.0194822	0.0385564	-0.0306207	-0.0413721	0.0437957	0.0681641
Rbfox2	FB-M1	#B33E52	0.125827	0.052508	0.0336732	0.0507475	0.0716362	-0.0223191	0.0309536	0.130912	0.171345
Reck	FB-M1	#B33E52	0.116512	0.0125903	0.0236627	-0.00113139	0.0388344	0.0115034	-0.0166195	0.0791293	0.0958128
Rell1	FB-M1	#B33E52	0.0954954	-0.0100751	0.0565674	-0.0174991	0.0111964	-0.0281058	-0.0273395	0.0281624	0.0636592
Rere	FB-M1	#B33E52	0.138985	0.0389917	0.0607122	0.0247096	0.0413216	0.00452126	-0.0283028	0.0921006	0.144431
Ret	FB-M1	#B33E52	0.303156	-0.126847	0.0780831	-0.0520718	-0.0638395	-0.1319	-0.0995228	0.0185817	0.0563318
Rexo2	FB-M1	#B33E52	0.0809185	-0.0219433	0.0477706	-0.00308531	0.0132497	-0.0224039	-0.0234726	0.012434	0.0442606
Rfx2	FB-M1	#B33E52	0.109939	-0.0491525	0.0328478	0.00239935	0.0313831	-0.0172308	-0.0302423	0.0549367	0.0687104
Rhoa	FB-M1	#B33E52	0.140507	-0.00611235	0.0581489	-0.00675845	0.0115472	-0.0397766	-0.0168848	0.0658219	0.114581
Rhoq	FB-M1	#B33E52	0.192919	-0.0397358	0.103663	-0.00375635	0.0522854	-0.0178793	-0.0624828	0.0487419	0.111719
Rock2	FB-M1	#B33E52	0.190332	-0.0192507	-0.0166198	0.0745091	0.0380816	0.0202934	0.0762531	0.143715	0.175485
Rras2	FB-M1	#B33E52	0.106954	-0.026892	0.056316	-0.0143644	-0.0184938	-0.00494233	-0.0517994	-0.00460813	0.0470894
Rtkn	FB-M1	#B33E52	0.149029	-0.0745788	0.0558375	-0.0134598	0.0507242	-0.0678782	-0.0623895	0.0368001	0.0455962
Rtn3	FB-M1	#B33E52	0.133818	-0.00317873	-0.00991365	0.0309197	0.0435047	0.0217203	0.0367392	0.114382	0.122594
Rtn4	FB-M1	#B33E52	0.195445	-0.0152817	0.0693786	-0.0255168	0.0571011	-0.0379849	-0.044142	0.113299	0.13959
S100a10	FB-M1	#B33E52	0.175596	-0.072903	0.0380274	-0.019591	0.0108098	-0.0615664	-0.0510346	0.0512992	0.0554099
S100a11	FB-M1	#B33E52	0.106312	-0.0283468	0.0401366	-0.0255234	-0.00503786	-0.0281928	-0.0521803	0.0110866	0.0414281
S100a6	FB-M1	#B33E52	0.1582	-0.0779809	0.010572	-0.0142774	0.00556843	-0.0433798	-0.0302581	0.0424707	0.0400443
S1pr2	FB-M1	#B33E52	0.109659	-0.0363427	0.0577613	-0.0410909	0.0190121	-0.048923	-0.0640403	0.037577	0.0513306
Sae1	FB-M1	#B33E52	0.106963	-0.0201965	0.0494908	-0.0189912	0.0259143	-0.0213618	-0.0324481	0.0372245	0.0818472
Samd4b	FB-M1	#B33E52	0.0961088	-0.0131951	0.0311598	0.00057121	0.0221422	-0.0229096	0.00416968	0.0411534	0.0699061
Scara5	FB-M1	#B33E52	0.212411	-0.0750476	0.0200215	-0.0274277	-0.0412574	0.149595	-0.0189638	0.0810672	0.0923262
Scml4	FB-M1	#B33E52	0.199463	-0.0638102	0.0543125	-0.000705691	0.114392	-0.112396	-0.0264247	0.12251	0.104989
Sdccag8	FB-M1	#B33E52	0.121456	0.015221	0.0227355	0.00650014	0.0475744	0.0124499	-0.0127562	0.0901585	0.109778
Sdk1	FB-M1	#B33E52	0.457615	-0.262594	0.0858501	-0.0393707	0.0417896	-0.132405	-0.152805	0.125343	0.114445
Sema3c	FB-M1	#B33E52	0.446018	-0.307978	0.114103	-0.00406203	0.0802219	-0.135757	-0.143645	0.124432	0.108966
Sema6d	FB-M1	#B33E52	0.11425	-0.00182735	0.0757823	-0.00606881	0.0440745	-0.0183796	-0.0474547	0.0502032	0.0873723
Serpinb6a	FB-M1	#B33E52	0.13385	-0.0329087	0.0319147	0.0086364	0.0288184	-0.0207378	-0.0201064	0.0584641	0.0832027
Sestd1	FB-M1	#B33E52	0.197477	-0.0111976	0.0613797	0.00588465	0.0567213	-0.034973	-0.0196421	0.1314	0.146745
Sft2d1	FB-M1	#B33E52	0.074045	0.0129586	0.0393731	-0.0112567	0.0127093	-0.00318923	-0.0221618	0.0224359	0.0650891
Sgms2	FB-M1	#B33E52	0.156889	-0.0416913	0.0650784	-0.0164481	0.0401434	-0.0524083	-0.0433805	0.0586086	0.0903964
Sgsm2	FB-M1	#B33E52	0.0926095	-0.0624601	0.0283471	-0.00908443	0.016071	-0.0147495	-0.0469586	0.0111627	0.0260909
Sh3bp2	FB-M1	#B33E52	0.138676	-0.0506638	0.0504046	-0.0130718	0.014906	-0.0375893	-0.0427347	0.0478958	0.0658333
Sh3bp4	FB-M1	#B33E52	0.086059	0.0187997	0.0662997	-0.00585347	0.00280013	-0.0317443	-0.026561	0.0224032	0.0571867
Sh3kbp1	FB-M1	#B33E52	0.136779	0.0301577	0.0358864	0.00983687	0.0447358	-0.093038	-0.00495544	0.0900926	0.0930738
Shoc2	FB-M1	#B33E52	0.116829	-0.00150998	0.0230824	0.0143098	0.0359553	0.00293049	0.000935631	0.0820606	0.100935
Sik3	FB-M1	#B33E52	0.150244	0.023174	0.0315818	0.0249572	0.0287471	0.0236264	0.0070468	0.0827235	0.134234
Sipa1l3	FB-M1	#B33E52	0.129331	0.0398524	0.0713488	-0.0222677	0.0174332	-0.0667515	-0.0436774	0.037891	0.0951536
Sirpa	FB-M1	#B33E52	0.161751	-0.0648893	0.0724561	-0.0166059	0.00257433	-0.0518173	-0.0610825	0.0225483	0.0520651
Slc25a24	FB-M1	#B33E52	0.0907614	-0.0183959	0.0375508	-0.00919194	0.0168394	-0.0306558	-0.0134161	0.0365025	0.0584947
Slc9a1	FB-M1	#B33E52	0.0921077	-0.00475465	0.0609374	-0.0213393	0.0193102	-0.0427202	-0.0516734	0.0259007	0.0481675
Slc9a9	FB-M1	#B33E52	0.0989561	0.0353731	0.0521055	0.000821012	0.0188377	-0.0403711	-0.00756596	0.0575547	0.0900989
Slco3a1	FB-M1	#B33E52	0.35526	-0.148607	0.102716	0.0057111	0.00798843	-0.125771	-0.104945	0.0639631	0.124173
Smc3	FB-M1	#B33E52	0.0790311	-0.00870393	0.0823643	-0.0218347	0.0159541	-0.00486543	-0.064632	0.0197873	0.0705417
Smurf1	FB-M1	#B33E52	0.208237	-0.0286216	0.0856514	-0.0146279	0.0421484	-0.0607931	-0.0545137	0.0590636	0.115291
Smurf2	FB-M1	#B33E52	0.18614	-0.0168088	0.00786367	0.0326738	0.0891892	-0.0151065	0.00814448	0.134084	0.145528
Sntb2	FB-M1	#B33E52	0.186552	0.0371538	0.0572598	-0.0427565	-0.0220927	-0.0193682	-0.0464856	0.074738	0.133725
Snx18	FB-M1	#B33E52	0.110962	-0.019709	0.0254049	-0.00897395	0.0505933	-0.0246925	-0.0109178	0.057209	0.0669106
Snx29	FB-M1	#B33E52	0.160666	-0.0173009	0.0619438	-0.0117858	0.0342116	-0.0121325	-0.0357373	0.0771395	0.0982678
Snx9	FB-M1	#B33E52	0.0918943	0.0226076	0.0603989	-0.010706	0.0230791	-0.0102788	-0.0233874	0.0248129	0.0874751
Soga1	FB-M1	#B33E52	0.12164	-0.00081607	0.0611748	-0.0446409	0.00408125	-0.0274216	-0.0489121	0.016338	0.0597777
Sorbs3	FB-M1	#B33E52	0.150012	-0.0560289	0.0630419	-0.0214692	0.0239263	-0.0698582	-0.0453735	0.036363	0.064533
Sorcs2	FB-M1	#B33E52	0.141465	-0.0744857	0.0634974	0.0139666	0.071509	-0.0985288	-0.0388177	0.0447779	0.0544591
Sox13	FB-M1	#B33E52	0.149181	0.00939902	0.0919691	-0.0660886	-0.0131221	-0.0656943	-0.0690978	-0.00316118	0.0656521
Spag9	FB-M1	#B33E52	0.170647	-0.0120738	0.0560486	0.016994	0.0242582	-0.00998504	-0.0225184	0.0835904	0.149714
Spsb1	FB-M1	#B33E52	0.239297	-0.105378	0.0618888	-0.0309652	0.0192082	-0.0836661	-0.0828249	0.0271592	0.0440575
Sptan1	FB-M1	#B33E52	0.117482	-0.0139314	0.0670781	0.000638885	0.0246869	-0.0220613	-0.0171201	0.0302389	0.0768768
Sptbn1	FB-M1	#B33E52	0.306171	0.00918665	0.0918071	0.0346108	0.065567	-0.09352	-0.0275444	0.161546	0.202782
Srgap1	FB-M1	#B33E52	0.229297	-0.0858609	0.0254277	-0.0239429	0.0175162	-0.082583	-0.054389	0.0695083	0.0740985
Ssc5d	FB-M1	#B33E52	0.0972985	-0.0121748	0.0567658	-0.0143434	0.0250014	-0.0203763	-0.0518302	0.0208364	0.0547257
Stard9	FB-M1	#B33E52	0.181675	-0.0289222	0.126258	-0.0322093	0.0527779	-0.0428202	-0.107212	0.0793558	0.110296
Steap3	FB-M1	#B33E52	0.134319	-0.0314441	0.0621623	-0.0293854	0.0134629	-0.0379953	-0.0781735	0.0583417	0.0753219
Stk38	FB-M1	#B33E52	0.143165	-0.0227943	0.0738559	-0.0179789	0.0254642	0.00166531	-0.0534704	0.044603	0.0900378
Ston2	FB-M1	#B33E52	0.32892	-0.105817	0.12968	-0.0595061	0.0879712	-0.169505	-0.126601	0.0917548	0.115736
Stx1a	FB-M1	#B33E52	0.0829059	-0.000412815	0.063109	-0.0451902	-0.00282485	-0.0268841	-0.0661273	-0.0012366	0.0411269
Stx2	FB-M1	#B33E52	0.124217	-0.00197412	0.0869774	-0.0473773	-0.0162888	-0.020176	-0.079297	0.00336679	0.0644319
Stxbp6	FB-M1	#B33E52	0.272159	-0.135886	0.062679	0.00526439	0.0409249	-0.0671314	-0.085556	0.118168	0.111258
Sulf1	FB-M1	#B33E52	0.328985	-0.0477361	0.0726685	-0.0197229	0.103863	-0.0779264	-0.0492893	0.190507	0.189483
Sulf2	FB-M1	#B33E52	0.132751	-0.12186	0.0496708	-0.00286489	0.0708606	0.00941704	-0.0431862	0.0509477	0.0370035
Tanc1	FB-M1	#B33E52	0.120697	-0.00203745	0.0524036	0.0100553	0.0503451	-0.0594713	-0.0322141	0.0506554	0.0900995
Taok3	FB-M1	#B33E52	0.171489	-0.00134332	0.083684	-0.039155	0.0128891	-0.0373118	-0.0501947	0.0595589	0.107348
Tcf21	FB-M1	#B33E52	0.0941882	-0.0402263	0.0400462	-0.0318668	0.0241097	-0.00287529	-0.0703572	0.0377084	0.0374116
Tcf7l1	FB-M1	#B33E52	0.160247	0.0114467	0.0708575	-0.0536649	0.0418755	0.0358395	-0.0551822	0.084999	0.123801
Tdrd7	FB-M1	#B33E52	0.0708771	0.0217979	0.055592	-0.0233026	0.0158918	-0.0303153	-0.0335488	0.0227244	0.0645755
Tead1	FB-M1	#B33E52	0.133143	0.0324495	0.0193673	0.0442845	0.0455423	0.00466736	0.0316081	0.091023	0.126882
Tek	FB-M1	#B33E52	0.199342	0.0210767	0.0218493	-0.0154656	0.00677394	-0.00760518	-0.00149491	0.112636	0.118973
Thbs3	FB-M1	#B33E52	0.125465	-0.0623868	0.0718207	-0.0460709	0.0240062	-0.0531646	-0.0864484	0.0230315	0.0332876
Tiam1	FB-M1	#B33E52	0.120326	-0.0896009	0.0451165	0.00689387	0.0918056	0.00996117	-0.0573869	0.0699153	0.0625764
Timp2	FB-M1	#B33E52	0.22032	-0.111883	0.0524798	0.0122046	0.0399823	-0.0254221	-0.0302677	0.0775607	0.087892
Tmcc2	FB-M1	#B33E52	0.0882008	-0.0218306	0.0387016	-0.00200042	0.0198329	-0.0294168	-0.0343554	0.0266592	0.0420101
Tmem63a	FB-M1	#B33E52	0.106028	-0.0316406	0.0453768	-0.00331948	0.0189717	-0.0327772	-0.0316285	0.0322505	0.0528043
Tmod3	FB-M1	#B33E52	0.113054	0.0440023	0.0619026	-0.0122874	0.0251688	-0.00568167	-0.0262479	0.06358	0.118419
Tnfaip2	FB-M1	#B33E52	0.135341	-0.0386887	0.00573131	-0.0038601	-0.0234037	-0.0707446	0.00519645	0.0210056	0.0339482
Tnfrsf1b	FB-M1	#B33E52	0.119457	-0.00178961	0.0162888	0.0108694	0.0150313	-0.0485201	0.0326343	0.058425	0.0772896
Tnxb	FB-M1	#B33E52	0.229283	-0.0164032	0.101671	-0.0950721	-0.0540836	0.0114255	-0.117952	0.00409564	0.068292
Traf5	FB-M1	#B33E52	0.140047	0.00260588	0.0492143	-0.0113984	0.0414317	-0.0594795	-0.000133071	0.084146	0.107066
Tram2	FB-M1	#B33E52	0.108967	0.0367584	0.0561671	-0.0154214	0.0394779	0.00232151	-0.02385	0.0646804	0.102871
Trio	FB-M1	#B33E52	0.191654	-0.0236043	0.0665637	0.038552	0.0427095	-0.0626026	-0.0301899	0.103395	0.13505
Trip10	FB-M1	#B33E52	0.0934174	-0.0617277	0.0598249	0.00396502	-0.0054319	-0.0265941	-0.0428747	-0.00911982	0.0187926
Tshz1	FB-M1	#B33E52	0.18439	-0.075412	0.0468612	0.0191422	0.0219616	-0.0395183	-0.0321549	0.0607389	0.0841647
Tspan18	FB-M1	#B33E52	0.198653	-0.120086	0.0674709	0.0137199	0.0666365	-0.079968	-0.0614333	0.0445696	0.0547348
Tspan5	FB-M1	#B33E52	0.26412	-0.110983	0.0660569	0.0037018	0.0378261	-0.0351117	-0.0595042	0.0758717	0.0967153
Ttc7	FB-M1	#B33E52	0.108291	-0.0403173	0.0707173	-0.00504261	0.029642	-0.0345608	-0.0623434	0.0166121	0.0470595
Ttc7b	FB-M1	#B33E52	0.154981	-0.0418532	0.037258	0.0348742	0.0487131	-0.0236748	-0.028105	0.0656351	0.0995882
Ttyh2	FB-M1	#B33E52	0.133074	-0.0449245	0.0504981	-0.0199251	-0.0121711	-0.119305	-0.0382104	-0.00118736	0.0497268
Tusc3	FB-M1	#B33E52	0.138405	-0.00713121	0.0329707	0.0164791	0.0344385	-0.00634178	0.0198633	0.0928231	0.117716
Twist2	FB-M1	#B33E52	0.0849258	-0.035961	0.0373648	-0.0145055	0.0205435	0.00582212	-0.0310476	0.0241995	0.0392064
Uap1	FB-M1	#B33E52	0.345424	-0.183368	0.05481	-0.0106849	0.0192974	-0.103038	-0.056663	0.0894328	0.103208
Ubash3b	FB-M1	#B33E52	0.23215	-0.0968856	0.0340188	0.00185656	0.063364	-0.126779	-0.0250604	0.0947555	0.0967013
Ubtd1	FB-M1	#B33E52	0.119455	-0.0111153	0.0644642	-0.0222309	0.00579548	-0.046361	-0.058409	0.00797305	0.0546694
Ubtd2	FB-M1	#B33E52	0.130057	0.00519207	0.042888	-0.0216917	0.0316943	0.0317833	-0.0077164	0.0731531	0.119352
Ugcg	FB-M1	#B33E52	0.0811197	0.023806	0.0557633	-0.0284138	-0.0135855	-0.00330067	-0.0467248	0.00858446	0.0534073
Ugdh	FB-M1	#B33E52	0.285832	-0.177257	0.0189806	-0.0186638	0.00813371	-0.0975521	-0.0648491	0.0641004	0.0502461
Ugp2	FB-M1	#B33E52	0.178709	-0.00756704	0.00363068	0.0341274	0.0633662	-0.0191635	0.00900575	0.112739	0.132034
Utrn	FB-M1	#B33E52	0.20019	-0.0331655	0.0309416	0.0524599	0.0694482	-0.0435321	-0.00736601	0.120525	0.151656
Vav2	FB-M1	#B33E52	0.111375	-0.0165382	0.0700032	-0.00708839	0.0476208	-0.0477893	-0.0508432	0.0286111	0.0752982
Vcan	FB-M1	#B33E52	0.36479	-0.0990716	0.0344909	0.0225881	0.141775	-0.174255	-0.00554907	0.211542	0.203455
Wdr60	FB-M1	#B33E52	0.107289	-0.0131359	0.0242986	-0.0154717	0.0344677	-0.0105363	-0.0283313	0.0597279	0.0744347
Wipf1	FB-M1	#B33E52	0.202289	0.0218514	0.0330928	-0.00511722	0.0385327	-0.00743362	-0.01129	0.113524	0.136812
Wnk1	FB-M1	#B33E52	0.157512	-0.0273332	-0.0148256	0.0920463	0.0550524	-0.0056154	0.044012	0.125259	0.142588
Xylt1	FB-M1	#B33E52	0.218908	-0.0784918	0.045521	-0.00299372	0.103492	-0.0880916	-0.0410428	0.0989391	0.104168
Ypel2	FB-M1	#B33E52	0.111264	-0.0581783	0.0692064	0.0161241	0.0371684	-0.0495857	-0.0587597	0.041671	0.0521485
Zadh2	FB-M1	#B33E52	0.108117	-0.0525634	0.0553604	0.000122478	0.0106418	-0.0111269	-0.0538491	0.0253219	0.0447529
Zbtb1	FB-M1	#B33E52	0.110725	-0.00854614	0.0518251	0.00678569	0.0320271	-0.0277632	-0.0238956	0.0607381	0.0937259
Zbtb44	FB-M1	#B33E52	0.0719585	0.00791985	0.0706726	-0.00950011	0.0228263	-0.00621224	-0.0529472	0.0333549	0.0812921
Zdhhc3	FB-M1	#B33E52	0.0799705	-0.00842639	0.0436017	-0.00663108	0.0106462	-0.0231712	-0.0315251	0.0341065	0.0614837
Zeb1	FB-M1	#B33E52	0.260909	0.0856895	0.110085	-0.07062	0.0174498	-0.00475908	-0.099628	0.13801	0.183315
Zfand3	FB-M1	#B33E52	0.187346	0.0100615	0.0389482	0.0341655	0.0350285	-0.00431058	0.016208	0.112873	0.175201
Zfhx3	FB-M1	#B33E52	0.169255	0.0158392	0.0892147	-0.00287176	0.0834874	-0.0540081	-0.051738	0.108959	0.144267
Zfp385a	FB-M1	#B33E52	0.144944	-0.0720969	0.0300188	-0.0151091	-0.00708187	-0.0423539	-0.0333308	0.017864	0.0339929
Zfp521	FB-M1	#B33E52	0.326387	-0.0546306	0.0591048	0.00654455	0.137495	-0.0669464	-0.0501572	0.218291	0.19736
Zfp638	FB-M1	#B33E52	0.127359	-0.0065097	0.0111401	0.0772337	0.038606	0.000158771	0.0445262	0.121234	0.147594
Zhx2	FB-M1	#B33E52	0.132676	-0.00056378	0.0668726	0.00221574	0.0325883	0.00835088	-0.0317531	0.0635784	0.11159
Zmiz1	FB-M1	#B33E52	0.221339	-0.162951	0.105475	0.0362735	0.102673	-0.00740416	-0.0859863	0.0776474	0.111123
Tgfb2	FB-M2	#3D0F99	0.0135662	0.13574	-0.0200052	-0.00784217	0.0124053	-0.0108163	0.0657423	0.070545	0.0705611
Col15a1	FB-M2	#3D0F99	0.0512694	0.16758	-0.00374309	-0.0123683	0.0752955	-0.128445	0.101984	0.14821	0.130714
Col26a1	FB-M2	#3D0F99	-0.0699941	0.168976	0.00306077	-0.0201442	-0.00885857	-0.00381298	0.0372037	0.013146	0.0227801
Col4a1	FB-M2	#3D0F99	-0.0957564	0.264403	-0.0913014	0.0360932	-0.0139481	0.10147	0.213839	0.0626431	0.0802992
Col4a2	FB-M2	#3D0F99	-0.0405963	0.173767	-0.0425688	0.0498158	0.0126907	0.0564023	0.136135	0.0454672	0.08275
Col5a3	FB-M2	#3D0F99	-0.0726452	0.215582	-0.0647269	0.0161097	-0.0594011	0.0182209	0.14791	0.013454	0.0230177
Col6a3	FB-M2	#3D0F99	-0.0583643	0.224127	0.00284935	-0.0169276	0.0469545	-0.0260677	0.0582985	0.0613428	0.0804001
Col6a6	FB-M2	#3D0F99	-0.179485	0.193051	-0.0650902	0.00631239	-0.0274314	0.253788	0.114393	0.0194457	0.029422
Col8a1	FB-M2	#3D0F99	0.0118115	0.293229	-0.0263478	0.0289108	0.136407	-0.0266547	0.119842	0.158096	0.15063
Aass	FB-M2	#3D0F99	-0.0651638	0.120322	-0.0230968	0.0181113	0.0225987	0.0957562	0.0624686	0.0641401	0.0523288
Abca8a	FB-M2	#3D0F99	-0.0585138	0.295738	-0.0138705	0.0161419	0.0246958	0.16439	0.142007	0.132273	0.143104
Adap2	FB-M2	#3D0F99	-0.174355	0.34479	0.0139007	-0.0267179	-0.0878174	0.108274	0.079627	-0.0579739	0.0365382
Adcyap1r1	FB-M2	#3D0F99	-0.0546244	0.106162	0.00368804	0.0019837	0.058161	0.000877617	0.0357559	0.0377895	0.038664
Adgrl3	FB-M2	#3D0F99	-0.0894803	0.433257	-0.0659585	-0.0340805	-0.0609058	-0.0989869	0.141461	0.104504	0.081901
Angptl2	FB-M2	#3D0F99	0.019155	0.221671	0.0615631	-0.0333133	-0.0120399	-0.0568975	0.000651641	0.0249833	0.0817865
Ank2	FB-M2	#3D0F99	-0.0463535	0.296132	-0.0512431	0.0964408	0.102558	0.0257438	0.128763	0.191295	0.174276
Ankrd50	FB-M2	#3D0F99	-0.0272382	0.112666	0.00824317	0.0167542	0.023504	0.0419013	0.0475228	0.0363837	0.0694984
Anks1b	FB-M2	#3D0F99	-0.0904699	0.217108	-0.0393196	-0.00403635	-0.00444619	0.0273652	0.0889392	0.0393106	0.0459848
Apba2	FB-M2	#3D0F99	-0.108199	0.303109	0.017918	-0.036138	-0.0815843	0.0399404	0.0261216	-0.0366673	0.0225486
Ar	FB-M2	#3D0F99	0.00119928	0.15605	-0.0303196	0.00608528	0.0240529	0.0995542	0.0662372	0.105186	0.112558
Arhgap21	FB-M2	#3D0F99	0.0501255	0.158479	0.0455	0.0208325	0.0694101	0.0156638	0.0283457	0.132756	0.147307
Arhgef6	FB-M2	#3D0F99	-0.0421622	0.124002	-0.0119339	0.0356431	0.0399813	0.025512	0.066919	0.0591346	0.0637809
Aspa	FB-M2	#3D0F99	0.0309646	0.079213	0.0106421	-0.00835655	0.053098	0.00920421	0.011119	0.074867	0.073506
Atp1a2	FB-M2	#3D0F99	-0.117425	0.150165	0.0589591	-0.0188119	-0.0281667	0.0730409	0.00483673	-0.0305304	-0.0039062
Atrnl1	FB-M2	#3D0F99	0.0532141	0.264037	0.000588614	-0.0021532	-0.0213434	0.0712155	0.0861519	0.10135	0.158239
Auts2	FB-M2	#3D0F99	-0.173882	0.209056	-0.102679	0.0622908	0.0646826	0.247719	0.144131	0.0811748	0.0727768
Bicc1	FB-M2	#3D0F99	-0.143493	0.270345	0.00754721	-0.0533731	0.0248849	0.243926	0.0300989	0.0500862	0.0689589
Birc3	FB-M2	#3D0F99	-0.0172103	0.0960503	-0.018841	-0.00600215	0.000352333	0.0695771	0.0814583	0.0272129	0.0642358
Blnk	FB-M2	#3D0F99	-0.155349	0.291096	-0.0354707	-0.018629	-0.0895953	0.148637	0.110664	-0.0450088	0.0268022
Bmper	FB-M2	#3D0F99	-0.162917	0.276856	-0.0926555	0.0162127	-0.065309	0.215013	0.126399	0.0334312	0.0516197
Cacna1d	FB-M2	#3D0F99	-0.066979	0.212967	0.00696984	-0.0139889	0.0184083	0.0253329	0.0422877	0.0289306	0.0543288
Cadps2	FB-M2	#3D0F99	-0.0865081	0.147741	-0.0207302	-0.00399961	-0.0105293	0.0850114	0.0549132	0.00922949	0.0376161
Cdh19	FB-M2	#3D0F99	0.0123891	0.135195	-0.00473893	0.018367	0.0412701	0.071518	0.0581802	0.151485	0.133001
Cdk14	FB-M2	#3D0F99	0.0773469	0.161395	-0.00248639	0.0216459	0.0631936	0.0695011	0.0735715	0.144875	0.174607
Chn1	FB-M2	#3D0F99	-0.0125311	0.247311	-0.0328148	0.0209634	-0.0128696	-0.0739132	0.132766	0.0817618	0.0975299
Colec12	FB-M2	#3D0F99	-0.0940599	0.251116	-0.000508604	0.0196334	0.0479864	0.0754336	0.0680812	0.071616	0.0951637
Csgalnact1	FB-M2	#3D0F99	-0.0875477	0.252839	-0.0370609	0.0022636	0.00227588	0.0734229	0.0998	0.057313	0.0723234
Cyp2d22	FB-M2	#3D0F99	-0.00145598	0.0901188	-0.0394667	0.0362393	0.00427982	0.0459943	0.0831416	0.0538122	0.0545958
Cyp39a1	FB-M2	#3D0F99	-0.0232681	0.0961693	-0.0125603	0.0181248	-0.0111738	0.0538883	0.0392959	0.0253181	0.0333179
Cyth3	FB-M2	#3D0F99	-0.0686172	0.296933	-0.0709618	0.0369704	0.0463626	0.084696	0.19282	0.122698	0.140415
Daam1	FB-M2	#3D0F99	-0.030696	0.19261	-0.0157215	0.0119396	0.0358452	0.0741309	0.0886255	0.0893158	0.0938008
Dapk2	FB-M2	#3D0F99	-0.066486	0.125367	-0.00291451	0.0171612	0.0414882	0.0643668	0.0587187	0.0265296	0.0451317
Dchs2	FB-M2	#3D0F99	-0.124425	0.234259	-0.0619081	0.0306705	0.0139296	0.111022	0.12931	0.064535	0.0667757
Ddx60	FB-M2	#3D0F99	-0.028924	0.0708502	0.000381679	-0.00290855	0.0280482	0.0274519	0.0179324	0.0483494	0.0382537
Deptor	FB-M2	#3D0F99	-0.0106018	0.119784	0.0278563	0.000380502	0.0315471	0.0514039	0.00402704	0.0636961	0.0754404
Dlc1	FB-M2	#3D0F99	-0.227834	0.338	-0.165351	0.119543	0.0220305	0.284935	0.267243	0.121492	0.116128
Dnm3	FB-M2	#3D0F99	0.0226417	0.116248	0.0310428	0.00632698	0.0585162	0.0828039	0.0465947	0.0942472	0.108284
Dock10	FB-M2	#3D0F99	-0.0613757	0.296355	0.0272384	0.00139176	0.0967649	0.00644425	0.0741102	0.122656	0.115466
Dok6	FB-M2	#3D0F99	-0.0560251	0.159082	-0.0254295	-0.00657697	-0.0152156	-0.0312742	0.0683295	0.0155255	0.0181009
Dtx4	FB-M2	#3D0F99	-0.0152911	0.0940907	0.0122307	-0.0074482	-0.0212833	0.0612453	0.0189135	0.0127698	0.0516069
Ecm2	FB-M2	#3D0F99	-0.0428567	0.133389	-0.0211725	0.0489293	0.0788261	0.0751989	0.075364	0.107955	0.0917155
Efcab5	FB-M2	#3D0F99	-0.0571619	0.153243	-0.000620352	-0.0110225	-0.0251079	0.0516464	0.0484852	0.00619692	0.0223812
Egfr	FB-M2	#3D0F99	-0.0124468	0.165583	-0.0934807	0.0195384	0.00908316	0.169354	0.125104	0.109709	0.110405
Eif4g3	FB-M2	#3D0F99	0.0182922	0.163815	-0.0131665	0.0218095	-0.0119432	0.0904972	0.104594	0.08461	0.138487
Enox1	FB-M2	#3D0F99	0.00149786	0.172416	-0.0149383	0.000844757	-0.00738054	0.0365989	0.0785066	0.053092	0.0754286
Enpp2	FB-M2	#3D0F99	-0.0482877	0.0640029	-0.0112198	0.000803512	0.0110212	0.118334	0.0442323	0.0531681	0.0486483
Eps8	FB-M2	#3D0F99	-0.0471906	0.154245	-0.0253231	0.0176223	0.0404216	0.0930825	0.0890421	0.0934	0.10196
Ets1	FB-M2	#3D0F99	-0.0311035	0.161669	0.061939	-0.0182834	0.00872597	0.00245847	-0.00710966	0.0134952	0.0707162
Etv6	FB-M2	#3D0F99	0.00865886	0.160507	0.00175303	0.0212851	0.0498411	0.109965	0.0730012	0.079703	0.146864
Fam110b	FB-M2	#3D0F99	-0.0599739	0.207796	-0.00769619	0.0149769	0.028473	-0.0512457	0.0690976	0.0590532	0.0700749
Fam49a	FB-M2	#3D0F99	-0.0526943	0.226435	-0.00101259	-0.00857768	-0.0234475	0.114541	0.0760443	0.0509818	0.0927811
Fap	FB-M2	#3D0F99	-0.0996167	0.425478	-0.0377337	0.00384206	-0.0582431	-0.0145455	0.138942	0.0658408	0.104893
Fat3	FB-M2	#3D0F99	-0.133203	0.178325	-0.0379479	0.00952712	0.0261157	0.0734704	0.0718037	0.0249406	0.00208013
Fnbp1	FB-M2	#3D0F99	-0.0173228	0.162214	0.041136	0.00671222	0.0635488	0.0628371	0.0329064	0.0621628	0.100045
Frmd4a	FB-M2	#3D0F99	0.0280137	0.153467	0.0351554	-0.00848773	0.0481083	-0.0732861	0.0238755	0.0631247	0.101952
Gfra1	FB-M2	#3D0F99	-0.118882	0.291252	0.0137672	-0.052955	-0.0883763	0.115117	0.0182294	-0.0174011	0.0144355
Ggt5	FB-M2	#3D0F99	-0.115209	0.116646	0.0063105	-0.040609	-0.0506127	0.155133	0.0123812	-0.048092	-0.00837926
Ghr	FB-M2	#3D0F99	-0.0189505	0.251242	-0.0466923	0.0550114	0.0561273	0.0647472	0.0902941	0.127465	0.12439
Gk5	FB-M2	#3D0F99	0.00427545	0.16332	0.0231704	-0.0303562	0.00715005	0.0125861	0.0315508	0.0680767	0.0867239
Glis3	FB-M2	#3D0F99	-0.132164	0.224836	-0.0510724	0.0145142	-0.0254631	0.18755	0.115205	0.0116715	0.0520731
Gna14	FB-M2	#3D0F99	-0.0749671	0.240831	0.0310725	-0.0483229	-0.0301204	0.0153581	0.0180065	-0.0193146	0.0186931
Gpc6	FB-M2	#3D0F99	-0.0265869	0.400725	-0.110568	-0.000561288	-0.0174937	0.0880193	0.146	0.149359	0.153362
Gpm6b	FB-M2	#3D0F99	-0.140044	0.302341	-0.0832316	-0.0137512	0.0035305	0.12554	0.0920488	0.0784383	0.0830437
Grm8	FB-M2	#3D0F99	-0.142825	0.2363	-0.00169315	-0.0491631	-0.00407846	0.139027	0.0439546	-0.0189924	0.00451145
Gsta3	FB-M2	#3D0F99	-0.0203125	0.210217	0.0684028	-0.029836	-0.0408638	-0.0355331	-0.0339213	0.00474145	0.0634502
Gucy1a2	FB-M2	#3D0F99	0.0482121	0.282171	0.038444	-0.0126974	0.0183066	-0.0372969	0.0812004	0.116932	0.154451
Hecw1	FB-M2	#3D0F99	-0.0118576	0.118623	0.00762044	-0.0210698	-0.00275173	-0.0205324	0.00579259	0.0274385	0.013756
Heyl	FB-M2	#3D0F99	-0.0505497	0.222145	0.00254852	-0.011224	0.0142235	-0.0166817	0.103691	0.032702	0.0608126
Hs3st3a1	FB-M2	#3D0F99	0.0327797	0.097425	0.0181838	-0.000110021	0.026436	-0.0262395	0.014992	0.0468862	0.0739973
Hs6st2	FB-M2	#3D0F99	-0.0999854	0.180154	-0.0399809	-0.00851821	0.0116911	0.000471155	0.0665157	0.0216894	0.00549255
Hsd11b1	FB-M2	#3D0F99	-0.131736	0.258985	-0.00693134	-0.00680729	-0.0709469	0.146881	0.0800915	-0.0470657	0.0384655
Hunk	FB-M2	#3D0F99	-0.101383	0.26544	0.0258062	-0.0220712	-0.0319002	0.0596523	0.0508737	-0.0385141	0.0389006
Ifi203	FB-M2	#3D0F99	-0.0790075	0.128048	-0.134699	-0.0371648	-0.032597	0.110393	0.0965226	0.0126588	-0.00247749
Ifngr1	FB-M2	#3D0F99	0.0096293	0.155792	-0.0359532	0.0339566	0.0239254	0.0483941	0.0943677	0.0941452	0.107713
Il1r1	FB-M2	#3D0F99	-0.033675	0.133998	-0.0120529	3.91e-05	0.026915	0.112073	0.0614383	0.0879426	0.0936921
Itga1	FB-M2	#3D0F99	-0.107601	0.188561	-0.0493104	0.0348294	0.00219888	0.0508541	0.0922659	0.0145539	0.0316934
Itga8	FB-M2	#3D0F99	-0.169431	0.202262	-0.0366867	0.0356594	0.0627002	0.140034	0.0880947	0.0461272	0.0460407
Itpr1	FB-M2	#3D0F99	-0.0974299	0.408163	-0.00908232	0.0142451	0.026129	0.0166264	0.121316	0.10599	0.134415
Kcnip1	FB-M2	#3D0F99	-0.193327	0.426082	-0.0283226	-0.0505714	-0.0661754	-0.086211	0.104547	-0.0317727	-0.000173273
Kcnk2	FB-M2	#3D0F99	0.0350176	0.123736	0.0125908	0.00243504	0.0354891	0.0112842	0.0601693	0.0513274	0.0699372
Klhl6	FB-M2	#3D0F99	-0.0380115	0.189988	0.00572992	-0.00891519	-0.0115373	-0.00155865	0.0507739	0.0238246	0.0509209
Lama2	FB-M2	#3D0F99	0.0148733	0.335328	-0.118808	0.0582917	0.108384	0.124075	0.21509	0.264264	0.205869
Lamb1	FB-M2	#3D0F99	-0.000549974	0.216113	0.0405387	-0.0256584	-0.0281174	-0.00577326	0.0360353	0.0519558	0.0937549
Lhfp	FB-M2	#3D0F99	-0.0303895	0.31711	-0.0922632	0.0611783	0.0618828	0.045867	0.198336	0.163433	0.17056
Lnpk	FB-M2	#3D0F99	0.0168806	0.106817	-0.0278356	0.022988	0.0302616	0.0333633	0.0737143	0.0862221	0.101918
Lpin3	FB-M2	#3D0F99	-0.0304663	0.102401	0.0224384	-0.0231417	-0.0126035	0.00276485	-0.00323283	-0.0174965	0.0238645
Ltbp1	FB-M2	#3D0F99	-0.0277363	0.198813	-0.0434199	0.0419036	-0.0493335	0.099097	0.124128	0.0211665	0.0787059
Maml2	FB-M2	#3D0F99	0.0608159	0.17789	-0.0197926	0.0112307	0.0904633	0.149014	0.0532652	0.165028	0.162889
Map2	FB-M2	#3D0F99	-0.0271685	0.26217	-0.021984	0.0223671	-0.0124212	0.0354003	0.0947768	0.0669169	0.105642
Mast4	FB-M2	#3D0F99	-0.104598	0.361864	-0.111865	0.0292874	0.0820282	-0.038614	0.178655	0.145404	0.12976
Meis1	FB-M2	#3D0F99	-0.0285854	0.133865	-0.0319982	0.0247933	0.0478893	0.111875	0.060073	0.101595	0.0980109
Mndal	FB-M2	#3D0F99	-0.0180313	0.0965878	0.0196169	0.00514671	0.018566	0.046566	0.0184895	0.0547161	0.0665675
Mrvi1	FB-M2	#3D0F99	-0.233664	0.316025	-0.0703107	0.00242505	-0.0552405	0.12468	0.169641	-0.0243664	0.011924
Ms4a4d	FB-M2	#3D0F99	-0.0267185	0.177422	0.0196549	-0.0193005	-0.0264869	0.0930446	0.0487343	0.0425451	0.0817529
Msc	FB-M2	#3D0F99	-0.0539188	0.138118	-0.00553884	-0.00937474	-0.0431544	0.037832	0.0347906	-0.0305645	0.00207543
Myo10	FB-M2	#3D0F99	-0.0938298	0.0935058	-0.00950873	0.055312	-0.00730526	0.0654921	0.068003	-0.00708566	0.0187726
Myo1b	FB-M2	#3D0F99	-0.0577125	0.195652	-0.00960153	0.0318064	-0.0205611	-0.00861992	0.0992756	0.0349699	0.0618669
Ncald	FB-M2	#3D0F99	-0.0550334	0.207499	0.0283342	0.0137863	0.0545089	-0.0288083	0.0357672	0.0699913	0.0732322
Necab1	FB-M2	#3D0F99	-0.0680498	0.332358	0.00306297	-0.0229409	0.0160058	-0.0722053	0.064338	0.0439646	0.0699774
Nedd4l	FB-M2	#3D0F99	0.00776298	0.155243	0.0519082	-0.00258325	0.0223483	0.0299209	-0.00269882	0.0430192	0.0938937
Ngf	FB-M2	#3D0F99	-0.00707674	0.207992	0.0221601	-0.065811	-0.00792358	0.0149986	0.0124494	0.0449017	0.0559331
Notch3	FB-M2	#3D0F99	-0.153585	0.275127	-0.0363624	0.0157871	-0.0618561	-0.0219209	0.108503	-0.0371811	0.0110607
Nrp1	FB-M2	#3D0F99	-0.11518	0.225394	-0.0164077	0.0450312	0.0353846	0.0205372	0.0754785	0.0291461	0.0398318
Nrxn2	FB-M2	#3D0F99	-0.0398792	0.107725	0.00190858	-0.0109958	-0.00241849	0.0302382	0.0380448	0.0173738	0.034744
Pag1	FB-M2	#3D0F99	0.00820132	0.178778	0.0462499	0.00072511	0.0255037	0.0181047	0.0164186	0.0641649	0.121548
Pawr	FB-M2	#3D0F99	-0.132608	0.147888	-0.0441682	0.00768109	-0.0181954	0.0440498	0.0819402	-0.0200886	-0.00547177
Plcl1	FB-M2	#3D0F99	0.0612557	0.18843	0.0243622	0.0178208	0.0723082	0.0533787	0.0385253	0.130929	0.135796
Plcl2	FB-M2	#3D0F99	-0.0831853	0.163841	-0.0177408	0.0388067	0.041868	0.124574	0.0995705	0.0708395	0.0923349
Pld1	FB-M2	#3D0F99	-0.00756505	0.193908	-0.0101369	0.0339864	0.0617596	0.106342	0.085975	0.114526	0.142497
Plekhh2	FB-M2	#3D0F99	-0.0145203	0.223467	0.0240332	-0.0271087	0.0390751	0.0773174	0.0309816	0.0823707	0.113237
Plxdc2	FB-M2	#3D0F99	0.0111943	0.325276	-0.0655025	0.0122949	0.0135833	0.0611659	0.13392	0.179378	0.147118
Plxnc1	FB-M2	#3D0F99	-0.0190587	0.100071	0.0199802	-0.012327	0.0336426	0.0543226	0.0217349	0.060192	0.0630201
Ppp1r14a	FB-M2	#3D0F99	-0.0407353	0.123439	-0.0278776	0.00711877	-0.0182788	0.0242633	0.0653315	-0.00320372	0.0181832
Prex2	FB-M2	#3D0F99	-0.0591093	0.335178	0.0309033	0.0157626	0.00795536	0.114453	0.0802986	0.0962976	0.145873
Prickle2	FB-M2	#3D0F99	-0.0296549	0.263843	0.00773549	0.0067426	0.0372484	0.0110818	0.0787887	0.1025	0.1248
Pxdn	FB-M2	#3D0F99	0.00558361	0.152216	0.00383866	0.0250947	-0.00261772	0.0486626	0.0492512	0.0428514	0.0743457
Ranbp17	FB-M2	#3D0F99	-0.032596	0.218372	-0.00566088	-0.00132203	0.0294131	0.00652326	0.0607141	0.0590323	0.0746855
Ranbp9	FB-M2	#3D0F99	0.0145597	0.126543	0.0160182	0.0187035	0.0273875	0.0755084	0.0322764	0.078448	0.129996
Rbfox1	FB-M2	#3D0F99	-0.15325	0.297002	-0.0540262	0.0841926	-0.00606376	0.0307081	0.112979	0.00738299	0.0307424
Rbms1	FB-M2	#3D0F99	0.0501307	0.202593	-0.0466299	0.0314269	0.0054461	0.114882	0.144122	0.119096	0.163061
Rcsd1	FB-M2	#3D0F99	-0.0616063	0.123785	0.00472433	0.0350507	-0.00014025	0.0648502	0.0504457	0.00570011	0.0474578
Rem1	FB-M2	#3D0F99	-0.0224199	0.115175	0.00911953	-0.0189928	-0.0429778	0.00704623	0.0454572	0.00506933	0.0434004
Rgs17	FB-M2	#3D0F99	-0.145632	0.254215	-0.0293935	0.0342299	-0.0209281	0.154879	0.128563	0.0311917	0.0801231
Rgs7	FB-M2	#3D0F99	-0.188653	0.351752	-0.038166	-0.0269569	-0.0654833	0.0823843	0.108708	-0.0191463	0.0184592
Rnd3	FB-M2	#3D0F99	0.0429716	0.155061	0.0237993	-0.00692674	-0.0196765	7.69e-05	0.0404209	0.0427108	0.0885948
Rnf144a	FB-M2	#3D0F99	-0.04571	0.101951	-0.00666793	0.0149287	0.0344577	0.00830473	0.0491936	0.0311746	0.0430572
Rnf150	FB-M2	#3D0F99	-0.0629699	0.255968	-0.0161968	0.0115189	0.0470341	0.0102757	0.0782281	0.0728482	0.097374
Ror1	FB-M2	#3D0F99	-0.0681742	0.357617	-0.0176915	-0.00384331	-0.0181144	0.0344687	0.129972	0.061805	0.112881
Rora	FB-M2	#3D0F99	-0.176572	0.38179	-0.062042	-0.00771781	-0.0331283	0.266989	0.129749	0.065909	0.101776
Runx2	FB-M2	#3D0F99	-0.0512586	0.254506	0.00336933	-0.0255398	0.00101499	0.0192583	0.0683991	0.0574665	0.0857848
S1pr3	FB-M2	#3D0F99	-0.0562926	0.089474	-0.0224857	0.0212293	-0.0115028	0.0111758	0.083823	0.0169537	0.0111269
Samd5	FB-M2	#3D0F99	-0.0736686	0.139405	-0.014626	-0.00307548	0.0295455	0.0413539	0.054547	0.0206363	0.0233867
Sbf2	FB-M2	#3D0F99	0.00597067	0.171798	-0.0751966	0.084506	0.0323047	0.0954781	0.136079	0.145477	0.158494
Sec24d	FB-M2	#3D0F99	0.0200622	0.11931	-0.0396261	0.06055	0.0404948	0.0628313	0.104843	0.12162	0.15042
Sema5a	FB-M2	#3D0F99	-0.0294442	0.124946	-0.0257717	0.0531975	0.0805164	0.0596176	0.0891495	0.0853942	0.0927742
Sema6a	FB-M2	#3D0F99	-0.0222161	0.220601	0.0037806	-0.0117862	-0.0436075	-0.00844639	0.0586912	0.0190279	0.0674611
Sgce	FB-M2	#3D0F99	0.0226322	0.0995996	-0.0545148	0.0340344	0.0548343	0.0777662	0.0969905	0.131484	0.110094
Sgms1	FB-M2	#3D0F99	0.0138694	0.0960957	0.00978097	0.0502342	0.00282916	0.0673602	0.0511159	0.0434939	0.0909173
Sh3rf3	FB-M2	#3D0F99	-0.0569278	0.227317	-0.00228729	-0.00795739	0.0373779	0.0606073	0.0477569	0.0610039	0.0968004
Slc1a3	FB-M2	#3D0F99	-0.0768354	0.129545	-0.0190755	0.0167015	0.0968196	0.114451	0.0513014	0.0960501	0.0683058
Slc24a3	FB-M2	#3D0F99	-0.0373535	0.145313	-0.0240512	-0.00111744	-0.00720582	-0.00139029	0.0709532	0.0545454	0.059181
Slc7a11	FB-M2	#3D0F99	-0.0744943	0.14077	-0.0441006	0.00865394	0.0046791	0.0905497	0.0901604	0.0462835	0.0421754
Slf2	FB-M2	#3D0F99	-0.0372814	0.278356	0.00590595	0.00796512	-0.00702428	0.0141641	0.0911235	0.0557002	0.115901
Slit2	FB-M2	#3D0F99	-0.0281101	0.216749	-0.0473915	-0.0149638	-0.00724245	0.0960629	0.0632505	0.0895234	0.0787729
Smc6	FB-M2	#3D0F99	-0.00160112	0.155205	0.0243672	0.00146644	0.0214405	-0.00642876	0.0209115	0.0396093	0.0884096
Smoc2	FB-M2	#3D0F99	0.0592059	0.253906	0.0361621	-0.058917	-0.0337456	-0.0824511	0.0164148	0.0809238	0.100004
Snrk	FB-M2	#3D0F99	-0.0869501	0.192898	-0.0209021	0.0646798	-0.00939553	0.0900029	0.0913134	0.0342873	0.0711289
Sobp	FB-M2	#3D0F99	0.00964633	0.15487	-0.0390273	0.0372068	0.0201753	0.0783756	0.106261	0.0935876	0.114633
Srpx2	FB-M2	#3D0F99	0.0172048	0.14829	-0.0226118	0.0199255	-0.00679384	0.0829139	0.0933725	0.0800206	0.105127
Ssh2	FB-M2	#3D0F99	-0.115585	0.316578	-0.0567493	0.0370778	-0.0291427	0.151798	0.157651	0.0962922	0.130784
St5	FB-M2	#3D0F99	-0.0987506	0.26291	-0.0125136	-0.0026207	-0.00912336	0.173434	0.0853492	0.0261222	0.100617
St6galnac2	FB-M2	#3D0F99	-0.0302246	0.107768	0.0501704	-0.0166732	-0.0111422	-0.0241939	-0.0114448	-0.0194884	0.026743
Ston1	FB-M2	#3D0F99	-0.0077764	0.156696	0.00355707	0.0175422	0.0106995	0.0510805	0.0483209	0.0651343	0.0890444
Svep1	FB-M2	#3D0F99	-0.0817478	0.194097	-0.00127652	0.0253094	0.0675365	0.311038	0.066444	0.0884804	0.128876
Syn2	FB-M2	#3D0F99	-0.0430121	0.246177	0.00918019	-0.0252292	0.0203852	-0.0668096	0.0392232	0.0308957	0.045385
Tcf4	FB-M2	#3D0F99	0.0325648	0.308558	-0.0396537	0.0361743	0.053393	0.0234804	0.128521	0.167461	0.191086
Tenm4	FB-M2	#3D0F99	-0.109483	0.205455	-0.00150962	-0.0290418	-0.000986551	-0.0639455	0.0303562	-0.0103682	-0.0078029
Tmem204	FB-M2	#3D0F99	-0.0553235	0.139001	-0.00699874	0.0283194	0.0228203	0.0596461	0.04885	0.031129	0.0494872
Tmem64	FB-M2	#3D0F99	-0.0017455	0.15613	0.0436062	-0.0387365	0.0031944	-0.0382161	-0.0179369	0.0215121	0.0561167
Tnik	FB-M2	#3D0F99	-0.201857	0.336146	-0.0795162	0.0276361	-0.0307494	0.251353	0.179222	0.0528642	0.0640382
Tns3	FB-M2	#3D0F99	-0.0519228	0.171896	0.0462284	-0.0105321	0.0733287	0.0392807	0.00798168	0.0544988	0.0874342
Tpst1	FB-M2	#3D0F99	0.0336151	0.136905	0.0283743	-0.0152133	-0.00662837	0.0690936	0.00957336	0.050374	0.104615
Vav3	FB-M2	#3D0F99	0.0434091	0.296035	0.00982759	0.0206896	0.0707345	-0.126935	0.0859378	0.15004	0.169059
Vegfc	FB-M2	#3D0F99	-0.0542415	0.168385	-0.0108302	0.0173403	0.0756323	0.134553	0.0762639	0.113933	0.104437
Vipr2	FB-M2	#3D0F99	0.0241763	0.0986722	0.00404023	-0.0353309	-0.00983583	0.00885846	0.0142522	0.0301099	0.0440906
Wdr66	FB-M2	#3D0F99	0.0634306	0.119238	0.0380394	-0.0485303	-0.0245796	-0.012954	-0.00530711	0.0287839	0.0636702
Zfp618	FB-M2	#3D0F99	-0.00848141	0.084932	0.00468488	0.00212599	0.0211421	0.0494063	0.0354334	0.0487175	0.053731
Zfp809	FB-M2	#3D0F99	-0.0289942	0.0969509	-0.0349693	0.0417092	-0.000664421	0.0820688	0.0838892	0.0382771	0.0791513
Stat2	FB-M3	#3E9FB3	0.0510981	-0.00190855	0.0912545	-0.076472	-0.0131811	-0.0372386	-0.101025	-0.0304079	0.0245417
Abcf1	FB-M3	#3E9FB3	0.0384762	0.000268132	0.0674641	-0.0186469	-0.000219205	-0.00965162	-0.0449864	-0.0220048	0.0136929
Abhd16a	FB-M3	#3E9FB3	0.0412441	0.000387809	0.0739604	-0.0330617	-0.00685705	-0.00949727	-0.0606951	-0.0168631	0.0212742
Acaa2	FB-M3	#3E9FB3	-0.0309742	-0.0523761	0.129092	0.00626634	-0.0217961	-0.0187621	-0.0813167	-0.0906652	-0.046017
Acadl	FB-M3	#3E9FB3	0.0218004	-0.0309045	0.194406	0.0189208	0.00626942	-0.0422151	-0.10678	-0.0495558	0.0346309
Acin1	FB-M3	#3E9FB3	0.0400273	0.0200461	0.0642565	0.0144646	0.0178266	-0.0059671	-0.0296549	0.0161256	0.0647856
Actc1	FB-M3	#3E9FB3	0.0381689	-0.0541666	0.492676	-0.0782928	-0.00909676	-0.130282	-0.283577	-0.141016	0.016956
Adamts10	FB-M3	#3E9FB3	0.011384	0.127715	0.131396	-0.0581472	0.0206501	0.04913	-0.0579641	-0.00554774	0.0648545
Adcy7	FB-M3	#3E9FB3	0.165435	-0.00703139	0.170345	-0.0180252	0.10809	-0.125557	-0.112006	0.0426874	0.0907866
Adgrl1	FB-M3	#3E9FB3	0.0264561	-0.00861691	0.0864343	-0.00703176	0.0475507	-0.0168119	-0.0500584	0.00646125	0.0346835
Agap3	FB-M3	#3E9FB3	0.0455712	0.0122499	0.0906168	-0.0301813	0.00532784	0.0157594	-0.0457974	-0.0027845	0.0446108
Ago2	FB-M3	#3E9FB3	0.0982604	-0.00123125	0.0821822	-0.0168222	0.0249144	-0.0295305	-0.0415538	0.0404753	0.0804751
Ahdc1	FB-M3	#3E9FB3	0.119096	-0.0200654	0.123619	-0.0321197	0.0369945	-0.0352563	-0.0913318	0.0127886	0.0700041
Akap12	FB-M3	#3E9FB3	0.100745	0.108302	0.115387	-0.0693266	0.0106641	-0.0420181	-0.0528135	0.0574355	0.103801
Akr1a1	FB-M3	#3E9FB3	0.0478767	-0.0118501	0.0695183	-0.0288989	-0.0060686	-0.013968	-0.0556823	-0.00274746	0.0300376
Akt2	FB-M3	#3E9FB3	0.0327409	-0.0130505	0.0675916	0.00196136	0.00565684	-0.0132107	-0.0376371	-0.0111661	0.0202688
Aldh2	FB-M3	#3E9FB3	0.0203372	0.025963	0.0936949	-0.0298041	0.000501114	0.00898975	-0.0627086	-0.0103177	0.0237893
Anapc16	FB-M3	#3E9FB3	0.0237379	0.000321758	0.0316965	5.63e-05	-0.00478673	0.000335711	-0.039626	-0.00294195	0.0250165
Anapc5	FB-M3	#3E9FB3	0.0156573	0.00124733	0.0766673	0.00349569	0.0247299	0.0100953	-0.02015	0.00588777	0.0424476
Anp32a	FB-M3	#3E9FB3	0.0219548	-0.01714	0.0741865	-0.00503372	-0.00268006	-0.00059256	-0.0491885	-0.0235566	0.0188724
Apopt1	FB-M3	#3E9FB3	0.058872	-0.000119092	0.0814419	-0.0192862	0.00972772	-0.0168536	-0.0658864	-0.00212609	0.0475437
Arhgap10	FB-M3	#3E9FB3	0.111669	0.0481607	0.0836718	0.0258509	0.0410526	0.0434827	-0.0155407	0.0688904	0.125555
Arhgef1	FB-M3	#3E9FB3	0.0485967	-0.00884096	0.0641305	-0.0414679	-0.0124547	0.00399494	-0.0571447	-0.0167784	0.0181361
Arhgef10	FB-M3	#3E9FB3	0.0967487	-0.0138731	0.085267	-0.0173696	0.0397861	-0.00879826	-0.0500933	0.0241208	0.0709213
Arhgef40	FB-M3	#3E9FB3	0.126469	0.0251757	0.1467	-0.0293419	0.0699303	-0.053421	-0.0782273	0.0370413	0.114644
Asb7	FB-M3	#3E9FB3	0.0545359	0.00411397	0.0626493	0.00106163	0.0205347	-0.00799064	-0.0300615	0.0174532	0.053556
Atf5	FB-M3	#3E9FB3	0.0673689	-0.0215746	0.0583582	-0.0170744	-0.0222199	-0.0388619	-0.0503885	0.00169862	0.0416015
Atp5b	FB-M3	#3E9FB3	0.0123424	-0.0660418	0.314518	-0.031843	-0.0169274	-0.0768561	-0.171885	-0.0965793	0.0048421
Atp5c1	FB-M3	#3E9FB3	-0.0170539	-0.0303346	0.163746	0.0164328	-0.0260538	-0.0347225	-0.0918824	-0.0619065	-0.00861788
Atp5f1	FB-M3	#3E9FB3	0.00861443	-0.0490112	0.208735	0.00228868	-0.0108634	-0.0450007	-0.12083	-0.0569227	0.00874912
Atp5h	FB-M3	#3E9FB3	-0.028747	-0.0867126	0.161047	-0.11444	-0.0704041	-0.072456	-0.163711	-0.168818	-0.135913
Atp5j2	FB-M3	#3E9FB3	-0.0417778	-0.0498441	0.197707	-0.0544879	-0.0353025	-0.0853374	-0.131822	-0.114841	-0.0753055
Atp5k	FB-M3	#3E9FB3	-0.0271361	-0.0684408	0.2023	-0.117309	-0.0639648	-0.0656236	-0.163796	-0.162656	-0.10986
Atp6v0b	FB-M3	#3E9FB3	0.0677592	-0.0212149	0.078075	-0.0280476	-0.016181	-0.0132402	-0.0839875	-0.0206732	0.0292831
Bcl9l	FB-M3	#3E9FB3	0.0339015	-0.0162351	0.0559661	-0.00103523	0.0150698	0.00896651	-0.04519	0.00110915	0.0233339
Bicd2	FB-M3	#3E9FB3	0.0412503	-0.00961991	0.0854199	-0.00359689	-0.012493	-0.019511	-0.053631	-0.0163861	0.0278523
Bicra	FB-M3	#3E9FB3	0.0379862	0.0405527	0.0670143	0.0114047	0.00840865	0.0249926	-0.0279061	0.0182327	0.07111
Bod1l	FB-M3	#3E9FB3	0.0434172	0.0287881	0.0815971	-0.00550981	0.0394943	-0.00199288	-0.0404439	0.0230637	0.0745319
Bptf	FB-M3	#3E9FB3	0.0906591	0.0312779	0.0950284	0.00769225	0.0395385	0.00785636	-0.0437352	0.0454732	0.11364
Brd1	FB-M3	#3E9FB3	0.076682	0.0221424	0.104321	-0.0130493	0.0229719	-0.00283854	-0.0425041	0.022635	0.0925205
Brd3	FB-M3	#3E9FB3	0.0282563	-0.0114345	0.0759971	-0.0201546	0.0137259	0.00596219	-0.0500974	-0.0169179	0.028054
Brf1	FB-M3	#3E9FB3	0.0496243	0.0130252	0.0804183	-0.00768172	0.00556656	-0.0191529	-0.0343872	0.0074581	0.0609375
C1qtnf1	FB-M3	#3E9FB3	0.0676933	0.00593773	0.10079	-0.0686005	0.010718	-0.0344578	-0.0932728	0.00123047	0.0321072
C87436	FB-M3	#3E9FB3	0.026137	-0.00291906	0.0326763	-0.0340545	-0.0143748	-0.0137787	-0.0497262	-0.0188026	-0.000938678
Calm1	FB-M3	#3E9FB3	0.0392579	-0.0300848	0.0619929	-0.0130764	-0.00519682	-0.0373842	-0.0486865	-0.0245278	0.00437049
Camk1	FB-M3	#3E9FB3	0.0520576	-0.0363959	0.0463184	-0.0163162	-0.0103107	0.000184356	-0.050121	-0.0300792	0.0098995
Camk1d	FB-M3	#3E9FB3	0.24506	-0.148272	0.726436	-0.257593	-0.0193706	-0.185832	-0.56122	-0.216768	0.0331077
Capns1	FB-M3	#3E9FB3	0.0390834	-0.023	0.0589044	-0.0096285	-0.0180077	-0.0125488	-0.0215629	-0.0109008	0.00893778
Cbfa2t3	FB-M3	#3E9FB3	0.0265385	0.0549825	0.0614733	-0.0202636	-0.0172102	-0.0504811	-0.0360624	-0.0151725	0.0266028
Ccdc186	FB-M3	#3E9FB3	0.0696359	0.00870927	0.114974	-0.027353	0.00874533	-0.0102804	-0.0698486	0.000199311	0.0780753
Ccnd3	FB-M3	#3E9FB3	0.0254249	0.0919039	0.0964048	-0.024534	0.0440518	0.0323369	-0.0499623	0.0225583	0.0722136
Cdc42ep1	FB-M3	#3E9FB3	0.00711243	0.0700036	0.0930141	-0.0663428	-0.042113	0.00332282	-0.074803	-0.0344817	0.022713
Cdk8	FB-M3	#3E9FB3	0.0435778	0.0668544	0.382432	-0.02735	0.0467144	0.0327795	-0.159765	-0.00677282	0.130109
Cebpz	FB-M3	#3E9FB3	0.04914	-0.0153902	0.0500002	-0.0345704	-0.0143113	-0.00600839	-0.041723	-0.013172	0.0401488
Cep250	FB-M3	#3E9FB3	0.0584369	0.00684442	0.0900966	-0.0138258	0.0153413	-0.00927089	-0.0556059	0.0163905	0.0565902
Cfl2	FB-M3	#3E9FB3	0.0611206	-0.00681838	0.0430347	0.0159742	0.0028532	-0.00549478	-0.0252112	0.0214522	0.0554408
Chd4	FB-M3	#3E9FB3	0.0478869	-0.00254881	0.0856504	0.0133046	0.0189446	-0.0110133	-0.0439151	0.00317042	0.0566035
Chd9	FB-M3	#3E9FB3	0.129738	0.103379	0.0660243	-0.000118501	0.0418167	0.0153519	0.0044115	0.111428	0.177548
Cherp	FB-M3	#3E9FB3	0.0147001	-0.00535499	0.0339185	-0.010916	-0.0148859	-0.00297872	-0.0232716	-0.0151374	0.0194126
Ciz1	FB-M3	#3E9FB3	0.0558466	-0.010537	0.0618386	-0.0124352	0.012314	-0.0154133	-0.0430136	0.00063504	0.0448707
Ckm	FB-M3	#3E9FB3	0.000392312	-0.0688349	0.346836	-0.0714929	-0.0404846	-0.0902814	-0.194283	-0.116125	-0.0280641
Clip3	FB-M3	#3E9FB3	0.048561	0.0119816	0.0538379	-0.0245535	0.0165138	0.000128607	-0.0305097	0.0203458	0.0416393
Clpp	FB-M3	#3E9FB3	0.00548675	-0.00808085	0.0640874	-0.0213436	-0.0199969	-0.0133919	-0.0497579	-0.0363571	0.00224899
Clptm1	FB-M3	#3E9FB3	0.031122	-0.0165493	0.0493355	-0.0161729	-0.00203118	-0.0171776	-0.0348646	-0.0141977	0.0133672
Clstn1	FB-M3	#3E9FB3	0.0630144	0.0177168	0.0495627	-0.013246	0.0244248	-0.0109597	-0.0285584	0.0257343	0.0620874
Cmklr1	FB-M3	#3E9FB3	0.0991945	0.0624701	0.110044	-0.0577633	-0.0054911	-0.109569	-0.0699964	0.00427179	0.0580338
Cmss1	FB-M3	#3E9FB3	0.221159	-0.125334	0.771256	-0.276102	-0.0292706	-0.165362	-0.569775	-0.236165	0.0376776
Cnot10	FB-M3	#3E9FB3	0.0464436	0.0129495	0.0774017	-0.0304817	0.015041	0.000104127	-0.0532055	0.00952289	0.0474692
Cnot3	FB-M3	#3E9FB3	0.04783	-0.005772	0.086549	-0.0190732	-0.0250544	0.000305779	-0.0505837	-0.022882	0.0281363
Comt	FB-M3	#3E9FB3	0.0143415	0.0108873	0.0378211	0.00319267	-0.0122296	0.0512311	-0.0274584	-0.00626336	0.0308541
Copz2	FB-M3	#3E9FB3	0.0193696	-0.00111412	0.0327863	-0.025927	0.00717736	-0.00156759	-0.0490588	-0.00758675	0.0217847
Cox6a2	FB-M3	#3E9FB3	-0.0349213	-0.0889475	0.318341	-0.176442	-0.0835919	-0.104314	-0.225697	-0.20585	-0.127172
Cox7c	FB-M3	#3E9FB3	-0.011303	-0.0535217	0.230533	-0.0754321	-0.0469961	-0.0639066	-0.175056	-0.126383	-0.0524674
Cracr2a	FB-M3	#3E9FB3	0.0176037	0.0304868	0.0471399	0.00556974	0.00167641	0.0153974	-0.0267756	-0.00997296	0.0411947
Crk	FB-M3	#3E9FB3	0.0549697	-0.0161911	0.0397261	0.00251508	-0.00990616	0.00980092	-0.00666542	0.00881946	0.0514559
Cs	FB-M3	#3E9FB3	0.00501141	-0.0460518	0.0607522	0.0141466	-0.00722712	-0.0210982	-0.0439724	-0.0360336	-0.00999982
Csnk1e	FB-M3	#3E9FB3	0.0466423	-0.0052028	0.0837781	-0.012777	-0.0139714	-0.00641299	-0.0412941	-0.0041552	0.0293211
Ctdsp2	FB-M3	#3E9FB3	0.0497723	-0.0181895	0.113812	-0.0219818	-0.00729093	-0.017269	-0.070309	-0.00691141	0.0344456
Cuedc1	FB-M3	#3E9FB3	0.059718	0.0454065	0.0935168	-0.0153437	0.00992451	0.00878636	-0.0309141	-0.00298941	0.0783746
Cygb	FB-M3	#3E9FB3	0.0478543	0.0302217	0.103936	-0.030433	0.0425351	-0.04855	-0.0646719	0.00101714	0.0348532
Cys1	FB-M3	#3E9FB3	0.101017	0.0252556	0.104792	-0.0286454	0.00505408	-0.00531623	-0.0856497	0.0165142	0.063081
Dab2ip	FB-M3	#3E9FB3	0.0676214	0.0529794	0.115389	-0.0554077	0.0270637	-0.0583803	-0.0637054	0.00734725	0.0659096
Dap3	FB-M3	#3E9FB3	0.0353015	0.00304509	0.0797072	-0.0403761	-0.00213554	0.00116354	-0.0536373	-0.0110852	0.0261798
Dazap1	FB-M3	#3E9FB3	0.0410353	0.00271959	0.0585612	0.0255404	-0.00844417	-0.0359828	-0.0378451	-0.0067576	0.0320236
Ddx24	FB-M3	#3E9FB3	0.0514589	-0.016749	0.0851071	-0.0291775	-0.00417633	-0.0291737	-0.0520081	-0.0172292	0.0315142
Ddx39b	FB-M3	#3E9FB3	0.0195023	-0.00488331	0.0573628	-0.00325553	-0.00820551	-0.00158222	-0.0241042	-0.0220226	0.0145029
Ddx46	FB-M3	#3E9FB3	0.0590993	0.0113469	0.0933077	-0.0138759	0.00922599	-0.00335315	-0.0637478	0.00426296	0.0595994
Dennd2a	FB-M3	#3E9FB3	0.126287	0.0555684	0.0545645	-0.027501	-0.00984294	0.000951072	-0.00383272	0.0567829	0.107698
Des	FB-M3	#3E9FB3	0.00461212	-0.0615858	0.302609	-0.105531	-0.0471909	-0.0580324	-0.165782	-0.124801	-0.047187
Dexi	FB-M3	#3E9FB3	0.0184981	0.000633332	0.0331085	0.00247829	0.0215343	0.0087629	-0.0198452	0.0132226	0.0279756
Dnaja2	FB-M3	#3E9FB3	0.00462032	-0.0229706	0.0612346	0.0241062	-0.0100444	0.00126332	-0.0393516	-0.0233281	0.0167864
Dnajc7	FB-M3	#3E9FB3	0.0505089	0.0235645	0.0635444	0.00880825	0.00175469	0.0210029	-0.0294825	0.0171763	0.0789612
Dnm2	FB-M3	#3E9FB3	0.0636333	0.010787	0.109844	-0.0168049	-0.00473313	0.00176832	-0.0648309	-0.0164274	0.0599446
Dusp11	FB-M3	#3E9FB3	0.0319355	0.0105497	0.084618	0.00359483	-0.00203933	-0.0297902	-0.0466152	-0.00278018	0.0373777
Dync1h1	FB-M3	#3E9FB3	0.130588	-0.028023	0.150068	-0.0382976	0.0101124	-0.0574878	-0.107288	0.010359	0.0773392
Dynll1	FB-M3	#3E9FB3	0.0729721	-0.0320001	0.0731805	-0.0275508	0.000865469	-0.0187808	-0.0727221	-0.0131489	0.0279644
Ebf3	FB-M3	#3E9FB3	0.0583653	0.112572	0.0769424	-0.0425656	-0.0420012	0.0511866	-0.0229478	0.0258167	0.0937506
Eef2	FB-M3	#3E9FB3	-0.0158481	-0.0637333	0.102081	-0.0105035	-0.0358077	-0.0292979	-0.0633272	-0.0870317	-0.0564347
Egln1	FB-M3	#3E9FB3	-0.00453956	-0.0129935	0.0618901	0.0100242	-0.0156644	-0.0148664	-0.0434731	-0.0518413	-0.0105529
Ehd2	FB-M3	#3E9FB3	0.0955715	-0.0248916	0.11704	-0.0460179	-0.0236918	-0.0140514	-0.0918227	-0.016634	0.0376734
Ehmt2	FB-M3	#3E9FB3	0.03806	-0.00965575	0.0770743	-0.0211198	-0.0017864	-0.0150469	-0.0465672	-0.015008	0.0185409
Eif2s2	FB-M3	#3E9FB3	0.0489596	0.0144301	0.0680524	-0.0197142	-0.000734612	-0.0107418	-0.0243136	0.0156445	0.0677794
Eif3c	FB-M3	#3E9FB3	0.0305565	-0.0162244	0.0640735	-0.0100876	0.0027248	-0.0160568	-0.0559636	-0.015065	0.0224038
Eif4ebp2	FB-M3	#3E9FB3	0.0347636	0.00522806	0.0775644	-0.0268883	-0.0209367	0.00223679	-0.0527923	-0.0116677	0.0359098
Eif4g1	FB-M3	#3E9FB3	0.0577256	0.000576672	0.0830516	0.0178621	-0.0155866	-0.00545339	-0.0283958	-0.00763545	0.0635326
Eif5b	FB-M3	#3E9FB3	0.0506608	-0.00971031	0.09159	-0.00105217	0.0150177	-0.0185972	-0.0577501	0.00343819	0.0556895
Elk3	FB-M3	#3E9FB3	0.0432674	0.0162164	0.0753799	0.00310819	0.0130293	-0.0118786	-0.038839	0.00622002	0.0527985
Eng	FB-M3	#3E9FB3	0.0337928	0.0116517	0.0618989	-0.0339094	-0.0181973	-0.0209877	-0.0258117	-0.00879972	0.0402016
Epas1	FB-M3	#3E9FB3	0.00704005	0.0873705	0.108075	-0.00926005	-0.00630651	0.00229536	-0.0393963	-0.0214808	0.0500776
Eri3	FB-M3	#3E9FB3	0.0636981	0.0481655	0.0979163	-0.0253917	0.0461727	0.0257569	-0.0290002	0.0522933	0.120049
Exoc3	FB-M3	#3E9FB3	0.0278843	0.0147818	0.0667031	-0.00980458	0.018347	-0.00629056	-0.0290669	0.0139238	0.0460551
Fam120a	FB-M3	#3E9FB3	0.0750236	0.00276464	0.0759264	0.00743709	0.0245667	0.00811208	-0.0268851	0.0496911	0.109277
Fam160b1	FB-M3	#3E9FB3	0.0475269	0.00343452	0.0789529	0.00298626	0.019706	-0.00376233	-0.0248596	0.01955	0.0609842
Fam193b	FB-M3	#3E9FB3	0.029504	0.0145898	0.0977639	-0.0102388	-0.00223336	-0.0135439	-0.0569937	-0.0139428	0.0395549
Fbxw8	FB-M3	#3E9FB3	0.0662842	0.0185204	0.104709	-0.0442521	-0.000550949	0.0218152	-0.0642493	-0.00467608	0.0568086
Fis1	FB-M3	#3E9FB3	0.0314349	0.00455145	0.0770192	-0.0220698	-0.0112224	-0.0078337	-0.0525044	-0.00599988	0.0196418
Flii	FB-M3	#3E9FB3	0.0572497	-0.0250202	0.0700241	-0.0171656	0.00799415	-0.0315272	-0.0564278	-0.0199198	0.0239439
Flywch1	FB-M3	#3E9FB3	0.0351983	-0.0147834	0.0656602	-0.00709716	0.0156281	-0.0161827	-0.0432257	0.0124313	0.0345637
Fndc3b	FB-M3	#3E9FB3	0.123322	0.121886	0.0605048	0.00295407	0.0347092	0.0451831	0.00674395	0.117922	0.188356
Foxp4	FB-M3	#3E9FB3	0.0596615	0.0132135	0.0608409	-0.0483653	0.00628014	-0.0110113	-0.0409965	0.00957358	0.0503517
Fth1	FB-M3	#3E9FB3	-0.0124635	-0.0710788	0.17016	-0.0133441	-0.0441444	-0.0492388	-0.108358	-0.0882564	-0.0408678
Glis2	FB-M3	#3E9FB3	0.0845431	-0.00784471	0.0871181	-0.014138	0.00204922	-0.0366834	-0.0427774	0.0194197	0.0661346
Gnai2	FB-M3	#3E9FB3	0.0449356	-0.0200442	0.0950506	-0.019141	-0.00428197	-0.0153825	-0.0470142	-0.0295722	0.0358013
Golgb1	FB-M3	#3E9FB3	0.0774699	0.00857754	0.101384	-0.00998657	0.055532	-0.000990727	-0.0550021	0.0553787	0.109205
Gphn	FB-M3	#3E9FB3	0.106022	0.023801	0.445724	0.0337624	0.0897266	0.0354127	-0.135052	0.0556194	0.215848
Gpr107	FB-M3	#3E9FB3	0.0618489	0.0234877	0.0811423	0.00433161	0.0105557	-0.0109683	-0.0352979	0.0146538	0.0809073
Gramd4	FB-M3	#3E9FB3	0.0330388	0.0340096	0.0299385	-0.0121735	-0.0545088	0.0147564	-0.00345353	-0.0237829	0.0282331
Grb2	FB-M3	#3E9FB3	0.0449872	-0.0072082	0.0984282	-0.0270517	-0.0115525	-0.000188717	-0.0568103	-0.0186928	0.0422372
Gstm1	FB-M3	#3E9FB3	0.0217609	-0.0388498	0.0354517	0.00516234	-0.0260266	0.0107352	-0.0213392	-0.0237995	-0.0143173
Gtf2i	FB-M3	#3E9FB3	0.0420454	-0.0164327	0.10527	0.00392048	0.0149465	0.0112847	-0.0716605	-0.00310525	0.0589444
Hadha	FB-M3	#3E9FB3	0.0124605	-0.0379902	0.18155	0.0153724	0.00627672	-0.0436191	-0.10175	-0.0501605	0.0137836
Hdac2	FB-M3	#3E9FB3	0.0312306	-0.000346585	0.0740607	-0.0226533	0.00522564	-0.0117316	-0.0434686	0.00906473	0.0450999
Hexb	FB-M3	#3E9FB3	0.148936	-0.0644976	0.603144	-0.026406	0.0591543	-0.104545	-0.292383	-0.0685522	0.13476
Hmgcl	FB-M3	#3E9FB3	0.016149	-0.0111463	0.0554436	-0.0323685	-0.00440823	-0.00590289	-0.0354854	-0.0251975	0.0111737
Hr	FB-M3	#3E9FB3	0.0739427	-0.0155938	0.0707669	-0.0231165	0.0084754	-0.0243221	-0.0486595	0.0139407	0.0365601
Hsp90ab1	FB-M3	#3E9FB3	0.0252878	-0.0646328	0.250448	-0.0935832	-0.0434334	-0.0794139	-0.192276	-0.128929	-0.0357875
Hspa5	FB-M3	#3E9FB3	0.0125122	-0.0527685	0.107065	0.00890506	-0.0200509	-0.034625	-0.0547769	-0.0393764	-0.00181082
Hspg2	FB-M3	#3E9FB3	0.0871873	0.0690647	0.123856	-0.0508811	-0.0298898	-0.0759739	-0.0307736	0.00262054	0.0795166
Iah1	FB-M3	#3E9FB3	0.0462723	-0.01865	0.0614546	-0.0354519	0.00167514	0.0106128	-0.0735918	-0.0215665	0.0183296
Ier5l	FB-M3	#3E9FB3	0.0613968	-0.0211503	0.0888061	-0.046174	-0.00422557	-0.0496976	-0.0934459	-0.0181226	0.014063
Iffo1	FB-M3	#3E9FB3	0.0828133	-0.0271034	0.099605	-0.0453803	-0.00929779	-0.0470939	-0.0920522	-0.0121027	0.0241618
Igf1r	FB-M3	#3E9FB3	0.0579982	0.125805	0.0602046	-0.0202967	0.000784182	0.0729461	0.00504627	0.0681519	0.111448
Il31ra	FB-M3	#3E9FB3	0.139318	-0.0507929	0.603286	0.0558185	0.105716	-0.111578	-0.238361	-0.0116219	0.17306
Iqce	FB-M3	#3E9FB3	0.0598698	-0.0135075	0.0861038	-0.0130137	0.00562534	-0.016002	-0.0611234	-0.00303717	0.0431706
Irf3	FB-M3	#3E9FB3	0.0382089	-0.0197122	0.044499	-0.0151981	-0.0277222	-0.00769156	-0.0395574	-0.0380682	-0.00275524
Jup	FB-M3	#3E9FB3	0.034849	0.0445152	0.0905529	-0.0158472	-0.00811349	-0.0423953	-0.0422549	-0.00902057	0.040929
Khsrp	FB-M3	#3E9FB3	0.0437622	-0.00315555	0.07025	-0.0226951	-0.00382818	-0.0191558	-0.0559393	-0.0106717	0.0272748
Kif1c	FB-M3	#3E9FB3	0.0234537	-0.0178124	0.0754854	0.0261373	0.000599002	-0.00253657	-0.0325972	-0.0180393	0.0299608
Klc1	FB-M3	#3E9FB3	0.126064	-0.0352317	0.10116	-0.00634042	0.0195704	-0.0431508	-0.0597178	0.0304909	0.0760917
Klf10	FB-M3	#3E9FB3	0.0592287	-0.0387416	0.042449	-0.0566102	-0.0112463	-0.0334431	-0.080172	-0.0209584	-0.00851586
Klhdc2	FB-M3	#3E9FB3	0.0499781	-0.00278194	0.060691	-0.0267302	0.0123883	-0.00493199	-0.039784	0.00919479	0.0515521
Klhl26	FB-M3	#3E9FB3	0.0773989	-0.0163254	0.0741406	-0.021681	-0.00355806	-0.0053767	-0.0626016	-0.00481276	0.0476003
Ksr1	FB-M3	#3E9FB3	0.0535219	-0.00874758	0.0995464	-0.0696037	-0.0133497	0.0928223	-0.0999571	-0.0250995	0.0409498
Larp1	FB-M3	#3E9FB3	0.0489946	0.00410698	0.0553828	-0.00986374	0.00248034	-0.0064048	-0.0326165	-0.00894161	0.0563352
Lars2	FB-M3	#3E9FB3	0.132273	-0.0807463	0.595242	-0.107557	0.036797	-0.122248	-0.330673	-0.105438	0.0632215
Lasp1	FB-M3	#3E9FB3	0.0930761	-0.00778146	0.0793371	-0.0428145	-0.00146268	-0.0117972	-0.0586397	0.0113825	0.0528837
Lgals1	FB-M3	#3E9FB3	0.0618786	-0.0235557	0.0540654	-0.0358525	-0.0183519	-0.0566316	-0.0279173	-0.0218316	-0.00206054
Lrp1	FB-M3	#3E9FB3	0.157316	-0.068332	0.0982633	-0.0329052	0.0711114	0.00468527	-0.0819215	0.0637271	0.0943725
Ltbp4	FB-M3	#3E9FB3	0.165808	-0.0304832	0.134536	-0.0179424	0.0650485	-0.0839127	-0.0713059	0.0519772	0.0806826
Ly6e	FB-M3	#3E9FB3	-0.0133038	-0.0233059	0.0723632	-0.0273591	-0.019756	-0.0331353	-0.0796004	-0.0606949	-0.040994
Man1b1	FB-M3	#3E9FB3	0.0341956	-0.0114656	0.0614509	-0.0357639	-0.000873302	-0.00374548	-0.0413019	-0.00670718	0.0165941
Man1c1	FB-M3	#3E9FB3	0.0852198	-0.0296132	0.0671438	-0.0285718	0.0218291	-0.0139566	-0.0656969	0.0148977	0.0480074
Map2k1	FB-M3	#3E9FB3	0.0820243	-0.000207532	0.074201	-0.00353861	0.014874	-0.019356	-0.0324075	0.0251669	0.0778586
Map3k14	FB-M3	#3E9FB3	0.0818159	0.00417727	0.0888521	-0.0509804	0.00669722	-0.028002	-0.0725075	0.0160414	0.0663042
Mapk14	FB-M3	#3E9FB3	0.0745255	-0.0138549	0.108536	0.00234828	0.00126218	-0.0152661	-0.0561259	0.0122504	0.0687868
Mapk8ip3	FB-M3	#3E9FB3	0.0354238	0.000392962	0.0764151	-0.00219319	0.0145281	-0.000995269	-0.0449404	-0.00525126	0.0418807
Mark2	FB-M3	#3E9FB3	0.0993002	-0.000171034	0.0664143	0.0153467	0.0363333	-0.0128155	-0.0396506	0.0543648	0.099977
Mark3	FB-M3	#3E9FB3	0.107636	0.0213171	0.128643	0.00262827	0.0451014	-0.0192543	-0.0489848	0.0669861	0.143461
Mark4	FB-M3	#3E9FB3	0.0452365	-0.0133319	0.0482391	-0.0211201	0.00507404	-0.0169595	-0.0340024	-0.000551689	0.0293792
Mb	FB-M3	#3E9FB3	0.0390128	-0.0429189	0.512205	-0.0363247	-0.00840624	-0.0927105	-0.212749	-0.0633398	0.0749024
Mdh2	FB-M3	#3E9FB3	-0.0189637	-0.0487431	0.199609	-0.0377725	-0.0217738	-0.0439373	-0.125966	-0.0958578	-0.0381963
Meaf6	FB-M3	#3E9FB3	0.0419925	-0.00987074	0.0564095	-0.024456	0.0153384	-0.0181758	-0.0442497	-0.00117407	0.0227917
Mpc2	FB-M3	#3E9FB3	-0.00789803	-0.0299153	0.0806877	0.00937685	-0.0124266	-0.0308064	-0.0633728	-0.0387346	-0.0108838
Mphosph8	FB-M3	#3E9FB3	0.0507453	0.0149717	0.0736641	-0.00140871	-0.00910016	-0.0024744	-0.0291218	0.00822667	0.0646844
Mrc2	FB-M3	#3E9FB3	0.106996	0.0666924	0.0911112	-0.0201681	0.0430148	-0.0265273	-0.025029	0.0532695	0.114162
Mri1	FB-M3	#3E9FB3	0.0270691	0.0121593	0.0491104	-0.0471417	-0.0143684	-0.0294512	-0.0673742	-0.023552	0.0060833
Mrps10	FB-M3	#3E9FB3	0.0379827	-0.014706	0.0340887	-0.0218446	-0.00822043	-0.0307896	-0.0519667	-0.00374834	0.0160513
Mxd4	FB-M3	#3E9FB3	0.0279293	0.0227193	0.0780214	-0.0359218	-0.011016	-0.00743008	-0.0449186	-0.0190802	0.0267772
Myl3	FB-M3	#3E9FB3	0.00689584	-0.0833858	0.474039	-0.0477593	-0.0140693	-0.10615	-0.233994	-0.118535	0.0118884
Myo9b	FB-M3	#3E9FB3	0.111847	-0.00503104	0.0936637	-0.0170443	0.0193443	-0.0378884	-0.0497506	0.0269566	0.0858284
Nadk	FB-M3	#3E9FB3	0.0823107	-0.0369114	0.0551682	-0.0198004	-0.00897188	-0.0140656	-0.0529572	0.00131127	0.0363363
Nckap5l	FB-M3	#3E9FB3	0.0681479	0.0167813	0.0762769	-0.0302831	0.00643807	-0.024085	-0.040254	0.0177541	0.0514303
Ncoa5	FB-M3	#3E9FB3	0.0501111	0.0134081	0.0554241	-0.00798412	0.0127658	-0.00181232	-0.0292513	0.0252843	0.0588877
Ndufb7	FB-M3	#3E9FB3	-0.033956	-0.042326	0.165822	-0.110569	-0.0320621	-0.0698639	-0.0943638	-0.118392	-0.0919273
Ndufs5	FB-M3	#3E9FB3	-0.0389412	-0.0211339	0.0144649	-0.0795602	-0.0425849	-0.023936	-0.0536444	-0.0860119	-0.082863
Ndufv2	FB-M3	#3E9FB3	0.00887004	-0.0354481	0.0843328	0.0129036	-0.00645622	-0.02537	-0.0576598	-0.0336454	-0.00203031
Nfe2l1	FB-M3	#3E9FB3	0.0338323	-0.0256968	0.108303	-0.0138152	-0.00938585	-0.0113882	-0.0594923	-0.011789	0.0296594
Nfic	FB-M3	#3E9FB3	0.0578372	-0.00666946	0.101847	-0.0155947	0.00189337	-0.0281201	-0.0589513	-0.00647637	0.0359143
Nfix	FB-M3	#3E9FB3	0.155381	-0.0110334	0.183399	-0.025487	0.0759709	-0.0229828	-0.118289	0.0513082	0.11947
Nod1	FB-M3	#3E9FB3	0.106977	-0.0245646	0.0947496	-0.026026	-0.010171	-0.0344985	-0.0762705	0.0081038	0.0488443
Nr1d1	FB-M3	#3E9FB3	0.0334236	0.00827654	0.117509	-0.0218763	-0.0173559	-0.0221696	-0.0805381	-0.0433509	0.00595891
Nsmf	FB-M3	#3E9FB3	0.0312856	-0.0280992	0.0361063	-0.0166649	-0.00284449	-0.00857146	-0.0584222	-0.0160784	0.00736136
Ntmt1	FB-M3	#3E9FB3	0.0287982	-0.0133892	0.0647656	-0.0411248	-0.00474278	-0.00697652	-0.0424552	-0.0316356	0.0135517
Nudcd3	FB-M3	#3E9FB3	0.0685639	0.030191	0.0646207	-0.00548642	0.0269001	0.00090182	-0.0203932	0.0524	0.0975714
Odf2	FB-M3	#3E9FB3	0.0741613	-0.0165432	0.0568735	-0.0147821	-0.00389575	-0.0102125	-0.0395648	0.00593647	0.0612684
Os9	FB-M3	#3E9FB3	0.0118633	-6.72e-05	0.0584739	-0.00961896	0.00257327	0.0244658	-0.0381512	-0.00601797	0.0236367
Osbpl5	FB-M3	#3E9FB3	0.110513	-0.0195508	0.208197	-0.0835957	0.00490586	-0.0429968	-0.171007	-0.0451495	0.0410205
Pabpc4	FB-M3	#3E9FB3	0.0192252	-0.00790113	0.0666279	-0.01673	-0.0291405	-0.0201427	-0.0588606	-0.0454426	0.00942355
Parp3	FB-M3	#3E9FB3	0.0800569	-0.0219554	0.0746065	-0.0133598	-0.0105971	-0.0265726	-0.0599587	0.0013526	0.0299023
Parp9	FB-M3	#3E9FB3	0.0247615	-0.00107742	0.061299	-0.0136055	0.0102473	-0.00583706	-0.0497587	-0.00206848	0.021244
Paxbp1	FB-M3	#3E9FB3	0.0637819	0.00264981	0.108551	-0.00293328	0.0358473	-0.0241713	-0.0595638	0.0180072	0.0749742
Pcolce	FB-M3	#3E9FB3	0.06714	0.000360319	0.0800914	-0.0406746	0.00557267	-0.0280885	-0.0654394	-0.00371597	0.0331737
Pcsk7	FB-M3	#3E9FB3	0.0292418	0.00780726	0.0491334	-0.0243452	-0.00526742	0.00175288	-0.0324607	-0.00703136	0.0328329
Pdzd2	FB-M3	#3E9FB3	0.133916	0.117095	0.116887	-0.0488117	-0.0437858	-0.0461671	-0.0692825	0.0325681	0.0926349
Pea15a	FB-M3	#3E9FB3	0.0405541	0.0165154	0.0451689	-0.0173522	0.00683424	-0.00767303	-0.026474	0.00883605	0.0385825
Peak1	FB-M3	#3E9FB3	0.150283	0.0849827	0.353305	0.0949059	0.0893476	0.0541305	-0.0219227	0.12251	0.285484
Pgf	FB-M3	#3E9FB3	0.100554	-0.0749201	0.0467351	-0.0189914	-0.0426316	-0.0177257	-0.0559622	-0.0215468	0.00751927
Phldb1	FB-M3	#3E9FB3	0.158947	-0.000910726	0.161943	-0.0431171	-0.0139748	-0.0702674	-0.0866838	-0.0042847	0.0820117
Plekha6	FB-M3	#3E9FB3	0.0561818	0.135056	0.151547	-0.0507728	0.0533301	-0.0348899	-0.0668023	0.0640943	0.0970599
Plekhh3	FB-M3	#3E9FB3	0.00613312	0.0184098	0.0615382	-0.0122998	-0.00892078	-0.00265084	-0.0379964	-0.0349667	0.00237033
Plin2	FB-M3	#3E9FB3	-0.00558143	0.0089517	0.0543341	-0.0152931	-0.0311382	0.00820625	-0.0409024	-0.0430444	0.00285338
Plod1	FB-M3	#3E9FB3	-0.0156729	0.0675473	0.0452028	-0.0107215	-0.0178327	-0.015759	-0.0192226	-0.0268218	0.0112278
Pml	FB-M3	#3E9FB3	0.0707307	-0.00179928	0.0796643	-0.038357	-0.00745794	-0.0227921	-0.0643142	0.00652598	0.0478413
Por	FB-M3	#3E9FB3	-0.0192128	0.0033671	0.064923	-0.0115067	-0.0188066	0.0571253	-0.0424098	-0.0454361	0.00191367
Ppard	FB-M3	#3E9FB3	0.00721207	0.0410932	0.0574586	-0.0306778	-0.0115342	-0.036387	-0.0296162	-0.0299743	0.0168773
Ppp1r9b	FB-M3	#3E9FB3	0.0392932	-0.000113709	0.0998749	-0.0277711	0.0011393	-0.029697	-0.0606896	-0.0240421	0.0258246
Preb	FB-M3	#3E9FB3	0.0159277	-0.00802898	0.0617594	-0.040453	-0.0281274	-0.0214865	-0.0663479	-0.0403099	0.000706528
Prex1	FB-M3	#3E9FB3	0.046189	0.0420243	0.0964598	-0.0240018	-0.00264821	-0.040163	-0.0470741	-0.0128831	0.0390618
Prkce	FB-M3	#3E9FB3	0.0514128	0.0571229	0.0598963	0.0484992	0.0031227	-0.0151786	-0.0188	0.0232035	0.0835619
Prpf4b	FB-M3	#3E9FB3	0.0623873	0.00199722	0.0659791	-0.00279572	0.0162135	-0.00229104	-0.0440755	0.0221307	0.0815518
Prrc2a	FB-M3	#3E9FB3	0.0323118	-0.00439634	0.0885378	0.00222898	0.0156312	-0.0215276	-0.0285056	-0.0213119	0.0266036
Prrc2b	FB-M3	#3E9FB3	0.0415146	0.0633577	0.0804626	-0.0137066	0.0112451	0.0153498	-0.0164249	0.0225183	0.0841557
Psmc6	FB-M3	#3E9FB3	0.0414142	-0.00857774	0.0607792	-0.014612	-0.000231063	-0.0204743	-0.054458	0.000774186	0.0432946
Psmd7	FB-M3	#3E9FB3	0.0314031	-0.00600484	0.072871	-0.00917359	-0.00666079	-0.0102339	-0.0505834	-0.0137753	0.0226997
Ptpn1	FB-M3	#3E9FB3	0.0604927	0.0158923	0.0693423	-0.0310204	-0.00434757	-0.0326409	-0.0439941	0.00734964	0.0514246
Rabac1	FB-M3	#3E9FB3	-0.0294654	-0.0135668	0.0464196	-0.0229827	-0.0233777	-0.0196809	-0.0248823	-0.052386	-0.0320827
Rabl6	FB-M3	#3E9FB3	0.0448827	0.00628936	0.0510003	0.00179795	0.00575286	-0.000565281	-0.0362775	0.00554177	0.0617363
Rack1	FB-M3	#3E9FB3	0.00583179	-0.031551	0.0742367	0.00390747	-0.0146132	-0.0236834	-0.0448174	-0.0284651	-0.010309
Rai1	FB-M3	#3E9FB3	0.0743054	0.0309385	0.0980192	-0.00988415	0.0170736	-0.0291292	-0.0599612	0.00777907	0.08035
Ralbp1	FB-M3	#3E9FB3	0.0627001	0.0161363	0.111234	-0.0301584	0.0110482	-0.00128699	-0.0747568	0.0154254	0.0567204
Rap2a	FB-M3	#3E9FB3	0.109754	-0.0623646	0.0908917	-0.0398477	0.0284518	-0.0435703	-0.108005	0.0326878	0.0521844
Rapgef1	FB-M3	#3E9FB3	0.0734951	-0.0342352	0.043649	0.0395113	0.00512467	-0.0200756	-0.0175869	0.00623146	0.0525262
Rarg	FB-M3	#3E9FB3	0.0673419	-0.024154	0.0795771	-0.0236444	0.0306424	-0.00813487	-0.0690803	0.0120019	0.0448776
Rbms2	FB-M3	#3E9FB3	0.0811997	0.0460302	0.048899	-0.016077	0.0168982	-0.0044105	-0.0132099	0.0506078	0.0894536
Reep5	FB-M3	#3E9FB3	0.000726262	-0.0227714	0.0800978	-0.00976505	-0.0260296	-0.036957	-0.0580683	-0.0441802	-0.0128007
Rgma	FB-M3	#3E9FB3	0.0962886	0.108472	0.118455	-0.0797225	-0.0120042	-0.0901587	-0.0879987	0.0238608	0.0766427
Rgmb	FB-M3	#3E9FB3	0.101081	0.0490488	0.108003	-0.0288594	0.0497953	-0.0617296	-0.0785238	0.0632582	0.0906514
Riok3	FB-M3	#3E9FB3	0.047383	0.0271814	0.0581731	-0.00304828	0.0228369	0.0223362	-0.0366574	0.0313296	0.0791865
Rnaseh2b	FB-M3	#3E9FB3	0.0399933	0.0167276	0.0674391	-0.0271296	0.0143	-0.00785828	-0.0450413	0.0187977	0.0398183
Ror2	FB-M3	#3E9FB3	0.0401687	0.160955	0.0854344	-0.0487178	-0.00447339	0.00358118	-0.0335307	0.0223792	0.0926745
Rpl10a	FB-M3	#3E9FB3	0.0363284	-0.0556327	0.102588	-0.034204	-0.0348725	-0.0420331	-0.0971022	-0.0730903	-0.03198
Rpl17	FB-M3	#3E9FB3	0.0108379	-0.0261729	0.0432857	-0.00645314	0.000999251	-0.025296	-0.0510843	-0.0256933	-0.0149754
Rpl35a	FB-M3	#3E9FB3	-0.0284044	-0.0360257	0.0384531	0.00999651	-0.02231	-0.0115303	-0.0312603	-0.0485591	-0.0425274
Rpl6	FB-M3	#3E9FB3	0.00179488	-0.057922	0.104532	-0.037749	-0.0382776	-0.0435163	-0.108772	-0.081378	-0.0461384
Rpl8	FB-M3	#3E9FB3	-0.0211467	-0.0303251	0.103662	-0.0534312	-0.0262806	-0.0353277	-0.0625413	-0.0686801	-0.0519929
Rplp1	FB-M3	#3E9FB3	-0.0306737	-0.0639614	0.0615221	0.000539564	-0.0391332	-0.0391325	-0.0667101	-0.0845158	-0.0651633
Rps15	FB-M3	#3E9FB3	0.00250804	-0.0698214	0.11155	-0.0123694	-0.0355403	-0.0321578	-0.0808795	-0.0798026	-0.0464592
Rps2	FB-M3	#3E9FB3	-0.0432457	-0.0500181	0.0275968	-0.0744099	-0.0516084	-0.0429359	-0.0675265	-0.102599	-0.108094
Rps24	FB-M3	#3E9FB3	0.00251239	-0.0539304	0.0417274	0.0195732	-0.0150132	-0.0289889	-0.0450943	-0.0609789	-0.0329058
Rps8	FB-M3	#3E9FB3	0.00954313	-0.0706527	0.111925	-0.027248	-0.0376577	-0.0432433	-0.108258	-0.0807981	-0.0398584
Rps9	FB-M3	#3E9FB3	-0.016997	-0.0407739	0.0630017	0.00917549	-0.0187859	-0.0314425	-0.0311744	-0.0539472	-0.0402976
Rpsa	FB-M3	#3E9FB3	0.00751649	-0.0518245	0.161159	-0.015794	-0.0210053	-0.0414901	-0.0816585	-0.0508116	-0.0156959
Safb	FB-M3	#3E9FB3	0.0380207	-0.00506892	0.0965786	0.0109588	-0.00677495	-0.00856786	-0.0477757	-0.0120989	0.0369575
Safb2	FB-M3	#3E9FB3	0.0224374	0.00198592	0.0896061	0.00669954	-0.00562591	-0.00280181	-0.0349978	-0.0250182	0.0270577
Sbno2	FB-M3	#3E9FB3	0.0701149	-0.0382209	0.0594354	-0.00754638	-0.00354759	-0.0209026	-0.0526633	-0.00909613	0.0213929
Scaf1	FB-M3	#3E9FB3	0.0372749	-0.0120762	0.0521328	-0.0214633	-0.00876576	-0.0147575	-0.0405907	-0.0149504	0.0138946
Sec14l1	FB-M3	#3E9FB3	0.120834	-0.00756259	0.0876574	0.000107184	0.0146063	-0.0727426	-0.0392992	0.0225305	0.0675626
Sec61a1	FB-M3	#3E9FB3	0.0466112	-0.0353846	0.0734895	-0.0237345	-0.014886	-0.0330394	-0.06148	-0.0288346	0.0198513
Selenbp1	FB-M3	#3E9FB3	0.0975148	-0.0366209	0.0906766	-0.0554976	0.000567091	-0.0273956	-0.0986818	-0.00535903	0.0168925
Selenow	FB-M3	#3E9FB3	0.028958	0.000808838	0.0564756	-0.0285136	-0.0120959	0.00379259	-0.0491307	-0.015878	0.0233022
Senp3	FB-M3	#3E9FB3	-0.000113082	0.0012973	0.0379279	-0.0182241	-0.00160516	-0.00349918	-0.0313035	-0.0262136	0.00298455
Sfswap	FB-M3	#3E9FB3	0.0412435	0.0383023	0.0761858	-0.00831041	0.00140605	0.0122252	-0.0300614	0.0159738	0.0692313
Sh3gl1	FB-M3	#3E9FB3	0.102103	-0.0323694	0.0681286	-0.0344604	-0.0193023	-0.0304981	-0.0768628	-0.0143164	0.037672
Sipa1	FB-M3	#3E9FB3	0.0302091	0.0316989	0.0772892	-0.0272861	-0.0414852	-0.0564608	-0.048819	-0.03489	0.0162027
Sirt7	FB-M3	#3E9FB3	0.0241838	-0.0199129	0.0709147	-0.0175107	-0.00871065	-0.00137076	-0.0497489	-0.0404995	0.000959064
Ski	FB-M3	#3E9FB3	0.17574	-0.0116377	0.184506	-0.0403245	0.0382835	-0.0287494	-0.111781	0.0273572	0.112671
Slc25a4	FB-M3	#3E9FB3	-0.0272288	-0.0808659	0.376315	-0.160878	-0.0683678	-0.143728	-0.255334	-0.199344	-0.112261
Slc38a2	FB-M3	#3E9FB3	0.0134088	-0.0223797	0.111217	0.00769119	-0.0490577	0.00656366	-0.075709	-0.067679	0.0162957
Slc8b1	FB-M3	#3E9FB3	0.0453686	0.0336772	0.0756887	-0.0393558	-0.0128568	-0.0178831	-0.0513953	0.00022494	0.0421324
Slfn5	FB-M3	#3E9FB3	0.0262266	0.0641801	0.0690065	-0.0473024	-0.038838	0.00410568	-0.0416614	-0.000142271	0.0428267
Smtnl2	FB-M3	#3E9FB3	0.0737807	0.00386126	0.0997689	-0.040361	0.00406901	-0.0118031	-0.0883533	-0.0063627	0.0384589
Snrnp70	FB-M3	#3E9FB3	0.0240956	0.011555	0.056633	0.0243108	0.00431947	0.0356541	-0.0174321	-0.00110326	0.0518818
Snx33	FB-M3	#3E9FB3	0.00997101	0.034707	0.0692473	-0.0196851	0.0049404	0.0286406	-0.0392866	-0.0202589	0.026189
Sod1	FB-M3	#3E9FB3	-0.0244305	-0.0264766	0.052076	-0.0251636	-0.00690151	-0.0191285	-0.0283773	-0.0497389	-0.0465054
Son	FB-M3	#3E9FB3	0.0466356	-0.00678443	0.118849	0.00656666	0.00971958	0.0249521	-0.085235	-0.0275676	0.0535325
Srrt	FB-M3	#3E9FB3	0.0162286	-0.0122525	0.0750771	0.00333681	-0.0175394	-0.0189144	-0.0511585	-0.0296893	0.00574067
St3gal1	FB-M3	#3E9FB3	0.102689	-0.026592	0.0638075	-0.0502624	-0.0138199	-0.00277269	-0.0638446	-0.00631239	0.0435173
St3gal2	FB-M3	#3E9FB3	0.10929	0.00219295	0.0932347	-0.0518248	-0.00122037	-0.00174548	-0.0738965	0.0069028	0.0698888
Strn4	FB-M3	#3E9FB3	0.0438623	-0.00918833	0.0680429	-0.0165489	-0.0093257	-0.0345503	-0.0524709	-0.0188401	0.0224852
Stx5a	FB-M3	#3E9FB3	0.0309054	0.0292566	0.0670812	-0.0194031	0.00882593	0.00928102	-0.0376593	-4.6e-06	0.0613057
Sucla2	FB-M3	#3E9FB3	0.000162975	-0.0292539	0.108553	-0.00576515	-0.00208997	-0.0428606	-0.0752277	-0.043398	-0.00098721
Syt17	FB-M3	#3E9FB3	0.116529	0.0568475	0.0936709	-0.0375444	0.0183427	-0.0114237	-0.0653519	0.0536753	0.0919479
Taco1	FB-M3	#3E9FB3	0.0847585	-0.0164617	0.22791	-0.00457241	0.0317803	-0.0330726	-0.108957	-0.0193711	0.0618233
Tbc1d9b	FB-M3	#3E9FB3	0.0718069	0.00827597	0.0751356	-0.00764978	-0.0173602	0.00212722	-0.0468164	0.00616699	0.0593665
Tbcd	FB-M3	#3E9FB3	0.0720759	0.00304462	0.0546882	0.0114154	0.0312796	-0.0171181	-0.0195859	0.0364276	0.0779063
Tead3	FB-M3	#3E9FB3	0.0598136	-0.00300457	0.0579446	-0.0175854	0.000398109	-0.0244343	-0.0299302	0.00498057	0.0217683
Tecpr1	FB-M3	#3E9FB3	0.0359859	-0.0154881	0.0866024	-0.017188	0.010917	-0.0193741	-0.0629264	-0.0163451	0.0144613
Tet3	FB-M3	#3E9FB3	0.100719	-0.00870019	0.106014	-0.00357141	0.0221006	-0.0230692	-0.0654441	0.0146687	0.0784967
Tfeb	FB-M3	#3E9FB3	0.0730734	-0.0163218	0.100495	-0.029486	-0.00752893	-0.0258832	-0.0756875	-0.0177675	0.0320198
Thra	FB-M3	#3E9FB3	0.0501075	-0.00218896	0.101284	-0.00615729	0.0260436	0.00685778	-0.0642304	0.00155173	0.0496645
Tln1	FB-M3	#3E9FB3	0.0575478	0.000232764	0.0814789	-0.0127804	-0.00622695	-0.018598	-0.0336733	-0.0179618	0.0417064
Tmem181a	FB-M3	#3E9FB3	0.0651328	0.01014	0.167426	0.0338191	0.0400509	-0.0248323	-0.0435024	0.0214683	0.0980647
Tmem184b	FB-M3	#3E9FB3	0.110496	-0.0212494	0.0993454	-0.0271733	0.0109479	-0.0453504	-0.0617612	0.0155021	0.0556653
Tmem214	FB-M3	#3E9FB3	0.0129513	0.00191947	0.0438496	-0.0177882	-0.0167791	-0.0190862	-0.00612805	-0.0199843	0.0167682
Tmem234	FB-M3	#3E9FB3	0.0585256	-0.00710859	0.0959081	-0.0314965	-0.00124996	-0.0159604	-0.0728896	-0.0098849	0.0341201
Tmem50a	FB-M3	#3E9FB3	0.0124846	0.00389873	0.0479096	-0.00595581	-0.0016284	0.00314729	-0.0294931	-0.0130971	0.0124364
Tmem56	FB-M3	#3E9FB3	0.0870293	-0.00847395	0.359541	0.0360618	0.062202	-0.0693412	-0.128252	0.0150767	0.116919
Tnks1bp1	FB-M3	#3E9FB3	0.0768842	-0.00420791	0.092559	-0.0412652	-0.00508106	-0.00552032	-0.0590671	-0.00315296	0.0524582
Tnnc1	FB-M3	#3E9FB3	-0.0189142	-0.072387	0.316807	-0.0889572	-0.043622	-0.0804465	-0.195939	-0.158749	-0.077
Tpcn1	FB-M3	#3E9FB3	0.110836	0.0176714	0.100588	-0.0641091	-0.00240357	-0.0643813	-0.0678537	0.0174663	0.0678054
Tpm1	FB-M3	#3E9FB3	0.0010566	-0.0957289	0.447317	-0.0514691	-0.0180579	-0.120476	-0.257781	-0.134699	-0.0134773
Tpr	FB-M3	#3E9FB3	0.0778843	-0.013075	0.0626009	-0.010325	0.0283587	-0.0103438	-0.0573951	0.0264417	0.0753907
Tpt1	FB-M3	#3E9FB3	-0.0241272	-0.0573651	0.0831966	0.0550497	-0.0178096	0.00770688	-0.0143364	-0.0522121	-0.0209226
Trak1	FB-M3	#3E9FB3	0.0915152	0.0393894	0.0560759	0.0123766	0.0276752	-0.00106344	-0.000569555	0.0273427	0.0875691
Trappc10	FB-M3	#3E9FB3	0.0551937	-0.013322	0.0940722	-0.0385586	0.00382648	-0.0258876	-0.0724613	-0.02659	0.0275632
Trim25	FB-M3	#3E9FB3	0.0628574	-0.00738614	0.0669233	-0.0305872	-0.0310991	-0.039945	-0.0539968	-0.0100448	0.0244627
Trim35	FB-M3	#3E9FB3	0.0785954	-0.0276013	0.0527878	-0.0203298	-0.0141368	-0.0157073	-0.0674859	-0.00964803	0.031799
Trrap	FB-M3	#3E9FB3	0.0630831	-0.00102681	0.102958	-0.00913032	0.0313075	-0.0197106	-0.0622587	0.00931805	0.0624993
Trub2	FB-M3	#3E9FB3	0.0293858	-0.00508759	0.0315942	-0.0320438	-0.00906603	-0.00815343	-0.0388095	-0.0120842	0.0123832
Tsc22d4	FB-M3	#3E9FB3	0.0175152	-0.0140303	0.0633547	0.028669	0.00962689	0.0163673	-0.0347609	-0.0276993	0.020439
Tshz3	FB-M3	#3E9FB3	0.0745746	0.103058	0.100487	-0.0532489	0.00442646	-0.0469504	-0.072407	0.0158454	0.0834776
Tspan9	FB-M3	#3E9FB3	0.0204418	0.102165	0.0680606	-0.0410935	-0.0226269	-0.00029071	-0.0241012	-0.0021833	0.0665154
Ttf1	FB-M3	#3E9FB3	0.0504089	-0.0103647	0.0549385	-0.017759	0.00974179	-0.00944401	-0.0308841	0.0132683	0.0361871
Ubb	FB-M3	#3E9FB3	-0.00232629	-0.0537172	0.06674	-0.0155318	-0.0319578	-0.0164681	-0.0614936	-0.0644282	-0.0449771
Ube4b	FB-M3	#3E9FB3	0.0339657	0.0480935	0.0742615	-0.00841902	-0.0022187	0.0303086	-0.031172	0.0252932	0.0821265
Ubr2	FB-M3	#3E9FB3	0.0181307	0.0276074	0.0584979	0.0284977	0.000643797	0.000407008	-0.0179157	0.0121622	0.0644633
Ubr4	FB-M3	#3E9FB3	0.0603549	-0.00939437	0.0907825	0.0162262	0.0184257	-0.0142248	-0.0295577	0.0108987	0.0671613
Uqcr11	FB-M3	#3E9FB3	-0.0221678	-0.0702761	0.276339	-0.108258	-0.0670879	-0.0836336	-0.187738	-0.161443	-0.0891044
Usp12	FB-M3	#3E9FB3	0.0457604	0.0163197	0.0874798	-0.0150547	0.0147626	-0.0157693	-0.0498131	0.000942793	0.0441869
Usp19	FB-M3	#3E9FB3	0.000798381	-0.0111413	0.0741613	0.0111876	-0.0155798	0.000619951	-0.0405449	-0.0324742	-0.000687554
Usp46	FB-M3	#3E9FB3	0.106311	-0.00396701	0.0784337	-0.0296187	0.0210279	-0.0216242	-0.0695862	0.0449802	0.0784691
Vcp	FB-M3	#3E9FB3	0.0222478	-0.0233948	0.0493288	-0.0221087	-0.0078277	-0.0213938	-0.0395903	-0.0191948	0.00177626
Vdac3	FB-M3	#3E9FB3	0.00233062	-0.0261909	0.0699611	-0.00896724	-0.0182311	-0.0107142	-0.0496804	-0.0400374	-0.00990183
Vgll4	FB-M3	#3E9FB3	0.0359163	0.0326996	0.0872459	-0.0438995	0.007861	0.0100827	-0.0578483	0.00904754	0.0525111
Vsig10	FB-M3	#3E9FB3	0.0367763	0.0261431	0.0899438	-0.0397512	-0.0150207	0.00922983	-0.0476409	-0.0135576	0.0302182
Washc2	FB-M3	#3E9FB3	0.0225615	0.0154052	0.0668701	0.00792246	0.0242274	0.0107022	-0.0281836	0.00463114	0.0485618
Wbp1l	FB-M3	#3E9FB3	0.0337955	0.0112003	0.0626847	-0.00164634	0.00195031	0.0122746	-0.031813	0.0144157	0.0539506
Wdr82	FB-M3	#3E9FB3	0.0586115	-0.0246235	0.0922379	0.00077669	0.0106811	-0.0328942	-0.0520625	0.00793899	0.059227
Xaf1	FB-M3	#3E9FB3	0.023945	0.015535	0.0629547	-0.0515203	-0.00671544	-0.0210059	-0.0569694	-0.0162249	0.0127374
Ypel3	FB-M3	#3E9FB3	0.000190517	0.0101633	0.0510001	-0.0202164	-0.0213558	0.0274284	-0.0506584	-0.0351086	-0.00211444
Ythdf2	FB-M3	#3E9FB3	0.0534623	0.0060481	0.0592197	-0.0149988	-0.0103187	-0.0115381	-0.039154	0.0082438	0.0484409
Ywhag	FB-M3	#3E9FB3	0.0567604	-0.049372	0.085712	0.000237515	-0.0230497	-0.0397183	-0.0660344	-0.0275797	0.0253833
Zbtb7a	FB-M3	#3E9FB3	0.0691763	-0.0336289	0.0508713	-0.0195091	-0.00736387	-0.0248006	-0.0419774	-0.0031272	0.0264373
Zc3hav1	FB-M3	#3E9FB3	0.0739382	0.020093	0.0745515	-0.0360768	-0.00883345	-0.0030663	-0.0570802	0.00856825	0.0594192
Zcchc14	FB-M3	#3E9FB3	0.0351028	0.0223067	0.0710252	-0.0125838	0.00761343	-0.00332769	-0.0455638	-0.00800286	0.0423606
Zcchc17	FB-M3	#3E9FB3	0.0162672	0.00236415	0.0580245	0.00238456	0.00790719	0.00180128	-0.0356506	0.00497983	0.0284011
Zcchc24	FB-M3	#3E9FB3	0.0561844	0.0317623	0.0804519	-0.0231523	-0.0144512	0.0489245	-0.0260402	0.0107876	0.0630128
Zfyve1	FB-M3	#3E9FB3	0.0660629	0.0130438	0.0781384	-0.0227545	0.0271805	-0.00319247	-0.047554	0.0310034	0.0726
Abhd18	FB-M4	#99600F	-0.0473847	0.0291215	-0.0883125	0.160257	0.0198534	0.0597179	0.094739	0.0463007	0.0301253
Adgrl2	FB-M4	#99600F	-0.0711073	0.0364852	-0.0285254	0.169261	0.0575391	0.0116304	0.0442368	0.0362236	0.0166342
Appl2	FB-M4	#99600F	-0.0194237	0.00452384	0.00290143	0.137211	0.0148326	0.0347067	0.0375213	0.00926206	0.0187791
Arhgap29	FB-M4	#99600F	0.0185794	0.00308283	-0.0129394	0.155591	0.0155017	0.00974872	0.0461049	0.0330421	0.0319974
Camta1	FB-M4	#99600F	-0.046327	0.00514971	-0.0702778	0.296311	0.0517736	0.0676837	0.129821	0.0615629	0.0669375
Chchd3	FB-M4	#99600F	-0.0130548	0.0103743	-0.0546168	0.257943	0.0451799	0.0203572	0.099973	0.0779328	0.0820338
Clasp1	FB-M4	#99600F	0.00286601	-0.00961828	-0.0533863	0.245824	0.0244628	0.0177194	0.0632568	0.0564594	0.0398801
Clk1	FB-M4	#99600F	-0.0331898	0.0314257	-0.0100578	0.179447	0.0285573	0.0662565	0.0851545	0.0414354	0.064881
Cpeb3	FB-M4	#99600F	-0.0391861	0.0213747	-0.0699935	0.334163	0.0453235	0.082224	0.132304	0.0680086	0.0703291
Ctnna1	FB-M4	#99600F	0.0311087	-0.0323193	0.0052296	0.261519	0.0506365	0.00983384	0.0365026	0.0496265	0.0822058
Ddx5	FB-M4	#99600F	0.00578412	0.0336877	-0.00948986	0.257927	0.0565732	0.0249578	0.109653	0.0707944	0.103736
Dip2c	FB-M4	#99600F	0.0364702	0.0311661	-0.0686181	0.256302	0.084435	0.0199987	0.112552	0.135648	0.126992
Erc1	FB-M4	#99600F	-0.0104669	0.0219704	-0.0219986	0.18102	0.0530738	0.037107	0.0683128	0.0745011	0.0789003
Fblim1	FB-M4	#99600F	-0.0547641	0.0638911	-0.056953	0.21568	0.0146838	0.0912974	0.136084	0.0208476	0.0521686
Fgfr2	FB-M4	#99600F	0.0365296	-0.0178317	-0.11427	0.246714	0.0233327	0.0435829	0.121343	0.090329	0.0852135
Hnrnpl	FB-M4	#99600F	-0.0287989	-0.00268045	-0.00211413	0.202713	0.023104	0.0323282	0.0538434	0.0148756	0.0362792
Immp2l	FB-M4	#99600F	-0.0214579	-0.016248	-0.0374654	0.277959	0.0764197	0.0522444	0.0920083	0.0713159	0.0759169
Kidins220	FB-M4	#99600F	-0.0152908	0.0196037	-0.0598111	0.252694	0.0759389	0.0589212	0.134881	0.0938082	0.0767452
Leng8	FB-M4	#99600F	-0.0268425	0.00344332	-0.0445608	0.189715	0.0177923	0.0410829	0.0904306	0.0321679	0.0372676
Lrrfip2	FB-M4	#99600F	0.00970288	-0.0051159	-0.0165767	0.247559	0.0576294	0.0112959	0.0520341	0.0499687	0.0678003
Magi2	FB-M4	#99600F	0.0874639	-0.0622058	-0.0880075	0.224218	0.112607	0.0464484	0.0662868	0.167187	0.112939
Mast2	FB-M4	#99600F	0.0491725	-0.0196891	-0.0325006	0.202663	0.0426936	-0.0136172	0.0687311	0.0591934	0.0685258
Mef2a	FB-M4	#99600F	0.062796	-0.00535322	-0.0549105	0.221168	0.112357	0.01846	0.103775	0.138643	0.1264
Mef2c	FB-M4	#99600F	0.0109226	0.0164744	-0.0216854	0.177497	0.084633	0.0152207	0.069882	0.0886767	0.0812212
Mical3	FB-M4	#99600F	0.0156799	-0.062694	0.00488742	0.229999	0.0996796	0.0218799	0.0266206	0.0352055	0.0353072
Mitf	FB-M4	#99600F	-0.0157281	-0.0140161	-0.0497859	0.324273	0.0948389	0.0753568	0.105698	0.101842	0.080558
Nckap5	FB-M4	#99600F	-0.00466514	0.0751036	-0.0137633	0.17262	0.0352671	0.07535	0.0371641	0.0440805	0.0648524
Neo1	FB-M4	#99600F	-0.0411899	-0.0154822	-0.0505069	0.247901	0.0561924	0.0407967	0.0655373	0.0365308	0.0395806
Nfyc	FB-M4	#99600F	-0.0399398	0.0276222	-0.0504459	0.232076	0.00931179	0.033277	0.0838463	0.0255227	0.0454758
Ogdh	FB-M4	#99600F	-0.0418894	-0.0177787	0.0008759	0.219715	0.00390059	0.0180955	0.0401543	-0.000569738	0.0119576
Oxct1	FB-M4	#99600F	-0.0686582	-0.00780563	-0.028059	0.220501	0.0425173	0.034159	0.0729548	0.0198019	0.00592764
Pcdh7	FB-M4	#99600F	0.0375474	-0.0292787	-0.0517337	0.345771	0.0505132	0.0251867	0.0920729	0.0980721	0.0937
Pde7a	FB-M4	#99600F	0.0311908	-0.0229683	-0.0323373	0.179021	0.0594436	0.0166822	0.0527036	0.0679078	0.0582468
Phactr2	FB-M4	#99600F	-0.0361425	0.0495982	-0.0687094	0.271326	0.0397594	0.101584	0.138637	0.0722026	0.0761269
Plekhm2	FB-M4	#99600F	-0.0427644	-0.00935214	-0.0673912	0.194365	0.028567	0.0715538	0.0920322	0.0234121	0.0210779
Psap	FB-M4	#99600F	-0.0237013	-0.0425444	0.0092275	0.139459	-0.00709398	0.00593667	0.0225894	-0.0153171	-0.00774326
Psme4	FB-M4	#99600F	-0.0140489	0.0225707	-0.0618517	0.218832	0.0463844	0.0274706	0.115611	0.0854492	0.0830262
Qk	FB-M4	#99600F	0.0247713	-0.00746839	-0.0462353	0.321412	0.0313216	0.070955	0.0821646	0.0541141	0.0963708
Ralgapa2	FB-M4	#99600F	-0.0443973	0.0191083	-0.0596472	0.338509	0.069677	0.0687536	0.126315	0.0777625	0.0778971
Rreb1	FB-M4	#99600F	0.00128982	0.0365973	-0.0108858	0.146191	0.0233456	0.0410307	0.0509564	0.0480446	0.0620921
Rsrp1	FB-M4	#99600F	-0.059365	0.0547038	-0.0551144	0.216692	0.0240204	0.0777862	0.108821	0.0522235	0.0497738
Slc4a4	FB-M4	#99600F	0.00280264	-0.0416548	-0.0464498	0.239151	0.0525937	0.0880469	0.0674712	0.043193	0.0570082
Slk	FB-M4	#99600F	0.0125342	0.0137694	-0.01925	0.183489	0.0304717	0.00359867	0.0908645	0.062507	0.0701676
Srsf1	FB-M4	#99600F	-0.0502568	0.0317647	-0.0388435	0.180644	0.0231971	0.0593936	0.0991921	0.0446508	0.0505345
Srsf2	FB-M4	#99600F	-0.028557	-0.00566622	-0.00253366	0.200251	-0.00825047	0.0198266	0.0421257	0.0040747	0.0326714
Stau2	FB-M4	#99600F	-0.0128211	0.0219929	-0.0426227	0.185311	0.0355663	0.0234667	0.0783008	0.0518059	0.0479998
Strbp	FB-M4	#99600F	-0.0125976	0.0231445	-0.120297	0.174174	0.0566414	0.0484014	0.121018	0.0991824	0.0729331
Tacc2	FB-M4	#99600F	0.0583349	-0.046395	-0.0264131	0.305455	0.0596518	0.0220513	0.101798	0.0715593	0.0804033
Tbc1d4	FB-M4	#99600F	0.00458632	-0.00390743	-0.0315918	0.314902	0.0408869	0.107469	0.10376	0.0585963	0.0941334
Tfdp2	FB-M4	#99600F	-0.0701207	0.0403619	-0.036378	0.154805	0.0231956	0.128223	0.0862346	0.0356534	0.0356262
Thrb	FB-M4	#99600F	-0.0859974	0.0156673	-0.109516	0.313213	0.149399	0.0899643	0.148396	0.124514	0.0631923
Tmem245	FB-M4	#99600F	-0.0219846	0.0107397	-0.0225393	0.179109	0.0455853	0.0318685	0.0450826	0.0409623	0.0492181
Vwa8	FB-M4	#99600F	-0.0307781	0.0200779	-0.00278827	0.224872	0.0294736	0.0475962	0.0668259	0.0608234	0.0800924
Tgfbr1	FB-M5	#54990F	0.0780927	0.00455422	0.0476573	0.0238289	0.143453	-0.00682027	0.000669571	0.0894256	0.105887
Col4a5	FB-M5	#54990F	0.0187869	0.0245528	-0.05433	0.120173	0.280931	-0.0159205	0.110874	0.143016	0.0870851
Col4a6	FB-M5	#54990F	0.0392929	-0.0338885	-0.0518839	0.0750704	0.347651	-0.00904673	0.0472591	0.142204	0.0642856
Abi3bp	FB-M5	#54990F	0.0310579	0.0972438	-0.0753125	0.0501172	0.23052	-0.0111784	0.106853	0.177562	0.119397
Actn1	FB-M5	#54990F	0.0230072	0.00217926	0.0412583	0.0384828	0.137742	-0.0322911	-0.0110653	0.019726	0.050445
Acvr1	FB-M5	#54990F	0.0919692	0.01537	0.025222	0.025041	0.140113	-0.0214686	0.0070048	0.0904041	0.118075
Adamts6	FB-M5	#54990F	0.104043	-0.0782851	-0.0267432	0.0647463	0.296919	0.0213484	0.00534515	0.136247	0.0775677
Adamtsl2	FB-M5	#54990F	0.0312561	0.00333783	0.00645705	0.0274924	0.259617	0.0180033	0.0247711	0.108367	0.0643852
Adipor2	FB-M5	#54990F	0.0118973	0.00299023	-0.000934809	0.0282118	0.0639244	0.0185603	0.0243674	0.0218703	0.0490441
Ahcyl2	FB-M5	#54990F	0.0472926	-0.0189928	-0.00018148	0.0425293	0.0723319	-0.0175835	0.00939245	0.0506444	0.0534711
Bicd1	FB-M5	#54990F	0.070236	-0.0669874	-0.012273	0.0750607	0.135932	0.031992	0.0160696	0.0853894	0.0823093
Cachd1	FB-M5	#54990F	0.0354374	0.0186372	-0.00326719	0.0355059	0.124184	0.0571336	0.0273023	0.0658164	0.0760047
Ccdc80	FB-M5	#54990F	0.104045	-0.015005	0.00636088	0.0249268	0.222007	0.0363233	0.00906235	0.124726	0.119896
Cd44	FB-M5	#54990F	0.0714841	-0.0499213	0.0747524	0.0185367	0.124165	-0.0604922	-0.046926	0.0138401	0.0518236
Cdh11	FB-M5	#54990F	-0.0187692	0.0351132	0.00991098	0.0537349	0.256822	0.00464227	0.0282317	0.0791168	0.0703503
Cdk5rap2	FB-M5	#54990F	0.0748918	0.00507406	0.0133392	0.0135491	0.0877193	-0.00699147	0.0017345	0.0820586	0.0953586
Cfh	FB-M5	#54990F	0.0412597	-0.0628197	0.00909483	0.0845415	0.310802	0.143431	0.0243781	0.186703	0.120873
Chka	FB-M5	#54990F	-0.00692894	-0.00769928	-0.0146298	0.0442656	0.0906749	0.026408	0.0310706	0.0281473	0.0362691
Chsy1	FB-M5	#54990F	0.012648	0.0082027	0.0290916	0.0186561	0.117256	-0.00240279	-0.025499	0.0345308	0.0584297
Ddi2	FB-M5	#54990F	0.0546391	0.0303309	0.0227852	0.0245152	0.100818	0.00262676	0.0144147	0.0548914	0.0882137
Dync2h1	FB-M5	#54990F	0.0374748	0.0385776	0.0094893	0.0298694	0.101379	0.0245729	0.035579	0.0867067	0.0982032
Fam3c	FB-M5	#54990F	0.0349613	0.0151898	0.0191276	0.0249301	0.0621909	-0.0165721	-0.0162457	0.0348381	0.0471464
Fam78b	FB-M5	#54990F	0.0302806	-0.00103954	-0.000999478	0.0563046	0.160304	0.0133248	0.0160922	0.0654594	0.0772572
Fibin	FB-M5	#54990F	0.0425125	0.0420439	-0.00263871	0.00536008	0.139514	-0.00783965	-0.0011371	0.0676844	0.0456085
Fxyd6	FB-M5	#54990F	0.0478633	-0.0267527	0.0321577	0.0198622	0.174187	-0.0218927	-0.00680975	0.0457838	0.0461242
Gata4	FB-M5	#54990F	0.00924953	-0.00652397	-0.009737	0.0558659	0.0921655	0.0296554	0.00748825	0.0463439	0.0568631
Gata6	FB-M5	#54990F	-0.0101238	-0.0146473	-0.0170861	0.0684889	0.0963823	0.0394921	0.0403018	0.0451852	0.0369161
Jmjd1c	FB-M5	#54990F	0.0953854	0.0585881	0.00705355	0.0547944	0.123279	-0.000820751	0.0425416	0.122588	0.153439
Kalrn	FB-M5	#54990F	0.103851	-0.0873353	0.0340907	0.0358052	0.136377	0.000345895	-0.0433944	0.0843701	0.0850289
Kifap3	FB-M5	#54990F	0.0719147	0.00613886	0.0121856	0.0306252	0.114992	0.00440126	0.00681628	0.0958539	0.0936636
Klhl29	FB-M5	#54990F	0.112504	-0.0627172	0.0339345	0.0365135	0.180498	0.00263075	-0.041859	0.0490212	0.0764612
Lhfpl2	FB-M5	#54990F	0.0540985	0.0429845	0.0155942	0.0337616	0.211438	-0.0931993	0.0212844	0.0708361	0.0888209
Lmo4	FB-M5	#54990F	0.0534862	-0.0266713	0.0509719	0.0160214	0.143191	-0.0237108	-0.0459902	0.0447655	0.0546894
Lrrk2	FB-M5	#54990F	0.0397858	-0.000980113	0.0131768	0.0433397	0.142954	0.0253445	0.0241123	0.0780057	0.0849901
Mfap4	FB-M5	#54990F	0.020023	-0.00980253	-0.00391535	0.0481957	0.289556	0.0189086	0.0132412	0.0669215	0.0291266
Myo1d	FB-M5	#54990F	-0.0264715	-0.00569523	-0.019755	0.092199	0.294809	0.0814493	0.0710319	0.0907639	0.0790256
Nfat5	FB-M5	#54990F	0.041936	0.059786	-0.027676	0.0572565	0.141227	0.041644	0.0773719	0.125164	0.146723
Nhs	FB-M5	#54990F	0.0746979	-0.034027	0.0169221	0.0385815	0.183687	-0.046644	-0.00185103	0.0758252	0.0769865
Nkain3	FB-M5	#54990F	-0.0138484	0.0760669	0.0386693	-0.018843	0.127727	0.0424402	-0.0343375	0.0316549	0.0366177
Npas3	FB-M5	#54990F	0.0710552	0.00815357	-0.0115897	0.0322766	0.160222	0.00234675	0.00606741	0.117873	0.0861237
Nxn	FB-M5	#54990F	-0.0231314	0.110668	0.00556479	0.00475588	0.128624	0.0157567	0.0285627	0.0571834	0.085994
P2rx7	FB-M5	#54990F	0.0213664	0.0259584	0.0375017	0.0279952	0.120763	0.0135418	0.00243048	0.0586498	0.0565629
Pbx3	FB-M5	#54990F	0.0683329	-0.0137253	-0.0140206	0.0282679	0.112594	-0.0105116	0.0159144	0.0938723	0.0833804
Pde3b	FB-M5	#54990F	0.10019	-0.0940849	-0.0265884	0.0695309	0.181836	-0.024314	0.0256581	0.10449	0.0878744
Pde7b	FB-M5	#54990F	0.0440763	0.0231525	0.00176091	0.0502862	0.17975	-0.108975	-0.00138706	0.11604	0.0694432
Pdgfrl	FB-M5	#54990F	0.00386572	0.0114254	0.00539567	0.0292503	0.165311	0.0045124	-0.000121476	0.050801	0.0411967
Pdzrn3	FB-M5	#54990F	-0.0574071	0.116574	-0.0601303	0.0711841	0.240236	0.0260646	0.0780725	0.0921793	0.0692558
Plce1	FB-M5	#54990F	0.142058	-0.12166	0.00569963	0.0949418	0.295511	0.0752977	0.00680286	0.1403	0.117087
Plod2	FB-M5	#54990F	0.0414335	0.0465648	0.00945355	0.0486649	0.144401	0.00780626	0.0208591	0.0875784	0.0933673
Pmepa1	FB-M5	#54990F	0.129319	-0.0452053	0.0838311	0.000544074	0.232646	-0.072099	-0.0592791	0.0566271	0.082635
Ppfibp2	FB-M5	#54990F	0.0119197	-0.0497403	-0.00286808	0.0554651	0.153194	0.00758275	0.00137959	0.0345559	0.0279968
Ppp3ca	FB-M5	#54990F	0.0609648	0.0569356	-0.0223308	0.068082	0.136558	0.0324238	0.0731408	0.13395	0.154569
Prkdc	FB-M5	#54990F	0.0538176	0.0138399	0.0158247	0.0278118	0.072831	0.00528925	0.010745	0.0661574	0.0734787
Rabgap1l	FB-M5	#54990F	0.0775867	0.00817215	-0.0379706	0.102218	0.187039	0.0261126	0.0691324	0.154812	0.133059
Rasa1	FB-M5	#54990F	0.0654398	0.044817	-0.00156879	0.0641188	0.126846	-0.000293146	0.0505558	0.114541	0.125612
Rin2	FB-M5	#54990F	-0.0296161	0.0513117	0.00507247	0.0179043	0.176071	0.0757492	0.00286878	0.0707024	0.071191
Sertad4	FB-M5	#54990F	0.0746681	-0.0409426	0.017972	-0.0100096	0.190557	-0.0400264	-0.0205533	0.0713827	0.0486787
Setbp1	FB-M5	#54990F	0.0636393	0.0405213	-0.00389058	0.0520341	0.26726	0.0663288	0.0252375	0.166449	0.141814
Shroom4	FB-M5	#54990F	0.0190452	0.0336106	0.00299385	0.0347134	0.0890807	-0.00890533	0.0313854	0.062481	0.0743287
Sipa1l1	FB-M5	#54990F	0.0602005	-0.033569	0.0540202	0.0555703	0.191597	-0.0166544	-0.0238676	0.0595749	0.0935786
Slc2a13	FB-M5	#54990F	0.013727	-0.0252388	-0.0176594	0.0300844	0.181284	0.0282837	0.027373	0.0650828	0.0424689
Socs2	FB-M5	#54990F	0.0932156	-0.0297743	-0.0395082	0.0570756	0.196328	0.00238287	0.0153812	0.123557	0.0881536
Spats2l	FB-M5	#54990F	0.025749	0.0296916	0.00786833	0.0150556	0.111406	0.00976381	0.0139321	0.0688427	0.0716299
Syne1	FB-M5	#54990F	0.135159	0.0424107	0.058019	0.0425719	0.193345	-0.0891217	-0.0013479	0.125188	0.146833
Synj2	FB-M5	#54990F	0.0460659	-0.0297417	0.0303778	0.0838219	0.098365	-0.0111985	0.0153007	0.0616968	0.0645298
Synpo	FB-M5	#54990F	-0.00258557	0.0556826	0.0546031	0.034841	0.139705	-0.0475925	-0.0304306	0.0280104	0.0547813
Tanc2	FB-M5	#54990F	0.0484826	0.000958803	-0.00242735	0.0549036	0.233111	0.0369991	0.0193828	0.112542	0.112197
Tiam2	FB-M5	#54990F	0.0326139	-0.0495713	-0.020953	0.0500315	0.215215	0.00355211	0.0385058	0.0916849	0.053454
Tjp1	FB-M5	#54990F	0.0301257	-0.0110618	0.0247507	0.0537341	0.0860303	-0.00769855	-0.000385735	0.0406683	0.0659795
Tmcc3	FB-M5	#54990F	0.0240405	0.0137915	0.00775161	0.0297987	0.222631	0.0282723	0.0198414	0.103475	0.0693658
Tmem45a	FB-M5	#54990F	0.0325538	0.0581913	-0.000473341	0.0150405	0.143982	0.0504464	0.0237556	0.0990981	0.110425
Tspan12	FB-M5	#54990F	0.0105625	0.0110195	0.0110353	0.0220438	0.0783295	-0.00935353	0.0094222	0.0387453	0.0438349
Ttc3	FB-M5	#54990F	0.0853379	0.0480152	0.0504318	0.0329353	0.139718	0.0141851	-0.0027225	0.11047	0.146517
Ttll5	FB-M5	#54990F	0.0333933	0.00317975	0.00633818	0.0398243	0.0953206	0.0106163	0.00785071	0.0623883	0.0682713
Unc5b	FB-M5	#54990F	0.0242683	0.0274309	0.0302044	0.0285958	0.15409	-0.074749	-0.00726488	0.0271145	0.0578014
Unc5c	FB-M5	#54990F	-0.0276531	0.0301455	-0.0734631	0.0374892	0.206405	-0.0471391	0.071289	0.124869	0.0401079
Zfhx4	FB-M5	#54990F	0.0441333	0.00369152	-0.0106615	0.0459549	0.152549	0.007099	0.0237714	0.0840447	0.0692017
Zfp462	FB-M5	#54990F	0.104887	-0.0368207	0.008352	0.0168619	0.169263	0.00349779	-0.00344217	0.113003	0.0828677
Zfp532	FB-M5	#54990F	0.0316615	0.0426426	0.0196761	0.0448944	0.103442	0.0142768	0.0188003	0.0760242	0.0891357
Zfp976	FB-M5	#54990F	0.0414713	0.00804795	0.0357704	0.00730821	0.0319347	0.00341318	-0.0232712	0.0424384	0.0585989
Zmat1	FB-M5	#54990F	0.0102911	0.010859	-0.0138477	0.0315678	0.115766	0.0413112	0.0351124	0.0648119	0.0574465
Fkbp5	FB-M6	#B3823E	-0.0406735	0.0867691	-0.0817595	0.0511745	0.0113871	0.278492	0.123244	0.0589847	0.093247
Acss3	FB-M6	#B3823E	-0.137945	0.0390565	-0.0747318	0.0540407	0.0270926	0.414852	0.121754	0.0258398	0.0272006
Adam12	FB-M6	#B3823E	-0.062496	0.0496136	-0.0526497	0.0123401	0.0224994	0.126826	0.0510904	0.0346876	0.0295119
Adamts15	FB-M6	#B3823E	-0.0264041	-0.0104039	-0.0263846	0.0218636	0.0344633	0.140145	0.01539	0.0111535	0.0125782
Adarb1	FB-M6	#B3823E	0.0411342	-0.0400197	0.0042087	0.0412554	0.0051247	0.169438	0.0248133	-0.000515366	0.0431954
Adhfe1	FB-M6	#B3823E	-0.0743551	0.0116469	-0.0261041	0.0533393	-0.00811469	0.116151	0.0272346	-0.0119658	-0.00950021
Adm	FB-M6	#B3823E	-0.0882264	0.0463358	-0.0871339	0.0494757	-0.0121234	0.246427	0.100036	0.0238236	0.017462
Aldh1a1	FB-M6	#B3823E	-0.0967716	0.170448	-0.0447508	0.0508747	0.054548	0.403097	0.113516	0.102106	0.125846
Angpt1	FB-M6	#B3823E	-0.169086	0.123851	-0.109043	0.111682	0.034423	0.36656	0.152742	0.0529644	0.055789
Ankrd44	FB-M6	#B3823E	-0.0741227	0.11482	-0.0579081	0.07538	0.0136019	0.244562	0.131765	0.0693888	0.0941743
Arhgap18	FB-M6	#B3823E	-0.0161042	0.100894	-0.0388061	0.0520603	-0.0123638	0.134375	0.0862818	0.0457603	0.0685034
Arhgap24	FB-M6	#B3823E	-0.128461	0.226002	-0.0567354	0.0349123	-0.150611	0.473764	0.154628	-0.0332383	0.0799649
Arhgap28	FB-M6	#B3823E	-0.0212542	0.0224545	-0.0187556	-0.00321328	0.0406252	0.208558	0.0112702	0.0573268	0.0432132
Bcl2	FB-M6	#B3823E	-0.0150154	0.115975	0.000414342	0.0513995	0.0891221	0.143411	0.0825293	0.10005	0.12629
Ccbe1	FB-M6	#B3823E	-0.0741496	0.0245245	0.0524889	0.00599169	0.0463423	0.326102	-0.0357356	0.028374	0.0452598
Ccn5	FB-M6	#B3823E	-0.0667483	0.0368332	-0.0590631	-0.0097808	0.0106449	0.316231	0.0248739	-0.0205155	-0.00484221
Dapk1	FB-M6	#B3823E	-0.153214	0.0273386	-0.0871172	0.0367355	-0.00443159	0.35849	0.0925458	-0.00374191	-0.00123327
Dcun1d3	FB-M6	#B3823E	-0.00128225	0.0140895	-0.0449695	0.0380359	0.0156702	0.176293	0.0863515	0.048225	0.0727376
Ddx3y	FB-M6	#B3823E	-0.0149123	0.00319585	-0.0455474	0.0798942	-0.0289044	0.197353	0.103662	-0.0125138	0.0473394
Dlg2	FB-M6	#B3823E	0.0339513	-0.0190248	-0.00651831	0.0548562	0.0743484	0.243788	0.0253104	0.0855226	0.0857637
Dock4	FB-M6	#B3823E	-0.0155865	0.0813899	-0.0326686	0.0573989	-0.00798053	0.209888	0.0725413	0.0302872	0.0738444
Dpep1	FB-M6	#B3823E	-0.190439	0.101531	-0.266848	0.0216664	-0.0819507	0.415256	0.258614	-0.0125009	-0.063425
Dpyd	FB-M6	#B3823E	-0.143001	0.115276	-0.112941	0.115209	0.0559829	0.329468	0.193353	0.0330608	0.040831
Ehbp1	FB-M6	#B3823E	-0.0527518	0.0823115	-0.0906562	0.154111	0.0520276	0.226471	0.14523	0.0903144	0.106908
Eif2s3y	FB-M6	#B3823E	0.0098345	-0.00778631	0.00491269	0.0861192	-0.00625226	0.180228	0.0521908	-0.000266687	0.0661669
Eln	FB-M6	#B3823E	-0.0511048	0.035464	-0.0810376	0.0408741	0.0714807	0.251132	0.088522	0.0401822	0.0367348
Eya2	FB-M6	#B3823E	-0.0814924	0.0836987	-0.00894426	0.0239106	-0.0771135	0.323003	0.0714112	-0.0148647	0.0522234
Fbln5	FB-M6	#B3823E	-0.0182566	0.0723611	0.00234084	0.0130641	0.0499443	0.173957	0.0298083	0.0733991	0.0731915
Fbn2	FB-M6	#B3823E	-0.139481	0.0912654	-0.0657312	0.026262	0.0282797	0.275391	0.0787733	0.00567912	0.0181379
Flt3l	FB-M6	#B3823E	-0.0858471	0.0661925	-0.0770132	-0.0688041	0.00579583	0.122669	0.0336863	-0.0268784	-0.054812
Fmo2	FB-M6	#B3823E	-0.138125	0.133006	-0.0136413	0.0318129	-0.00783748	0.393195	0.0769348	-0.0166162	0.0502259
Foxp1	FB-M6	#B3823E	0.00599693	0.0124172	-0.0807763	0.064768	0.0614925	0.150642	0.0895608	0.0802886	0.0769987
Galnt15	FB-M6	#B3823E	0.0425016	-0.0550265	0.0187741	0.0136697	-0.0291823	0.127567	-0.00194982	-0.00884391	0.0201256
Gnai1	FB-M6	#B3823E	-0.0897547	0.0520539	-0.0659277	0.0484388	0.0215996	0.264631	0.0958582	0.00884407	0.0380186
Gpr39	FB-M6	#B3823E	0.0290163	-0.0684247	0.00633729	0.0477359	0.14152	0.252409	0.000762444	0.063913	0.0759935
Gria3	FB-M6	#B3823E	-0.124028	0.158449	-0.0416215	0.071035	0.0531067	0.247302	0.119417	0.0291611	0.0718926
Hipk1	FB-M6	#B3823E	-0.0242966	0.0584569	0.002219	0.0519617	0.00407466	0.0981363	0.0823724	0.0397754	0.0912994
Ifi205	FB-M6	#B3823E	-0.0346655	0.102164	-0.0721853	0.0446838	-0.0497407	0.305183	0.13557	0.0425018	0.0960534
Ifi207	FB-M6	#B3823E	-0.102278	0.150475	-0.105144	0.0793109	-0.0333671	0.259935	0.190122	0.0746095	0.0907451
Ifi211	FB-M6	#B3823E	-0.0518068	0.0878283	-0.125721	0.0306512	-0.0250128	0.208362	0.149583	0.060521	0.052682
Il11ra1	FB-M6	#B3823E	-0.0491333	-0.00635745	-0.0215877	0.0556625	0.0351064	0.0742363	0.042354	0.0175551	0.000654445
Il1rap	FB-M6	#B3823E	-0.0185011	0.0715672	-0.0402361	0.0431427	0.0420127	0.156572	0.0788898	0.0784331	0.0897908
Itgbl1	FB-M6	#B3823E	-0.0873912	0.236597	-0.0386826	0.0537224	0.176441	0.250373	0.125618	0.130892	0.1158
Kcnab1	FB-M6	#B3823E	-0.0356185	0.0186911	-0.0540701	0.0556205	0.0310277	0.153224	0.0778179	0.0326005	0.0439371
Klhl2	FB-M6	#B3823E	-0.011445	0.0294625	-0.0191336	0.036223	0.00922543	0.0937978	0.0584911	0.0136049	0.05643
Leng9	FB-M6	#B3823E	-0.0229358	0.0179126	-0.0596095	0.0503719	-0.0228561	0.0563738	0.0610543	0.0207238	0.00795689
Lrmda	FB-M6	#B3823E	-0.093776	0.0741473	-0.0607814	0.062375	-0.00528385	0.182112	0.0990811	0.00587383	0.0367171
Lvrn	FB-M6	#B3823E	-0.0952789	0.0720194	-0.0550551	0.0398173	-0.0905163	0.355254	0.106627	-0.037187	0.029831
Maml3	FB-M6	#B3823E	-0.0405493	0.0561277	-0.0282832	0.0525872	0.0653214	0.148455	0.0703631	0.07518	0.0580157
Man2a1	FB-M6	#B3823E	-0.0872112	0.0947717	-0.0950919	0.114184	0.0202232	0.327752	0.190209	0.0711263	0.119845
Maob	FB-M6	#B3823E	-0.0413101	-0.00435566	-0.0543695	0.0781033	0.0381944	0.213562	0.0785183	0.0515521	0.0415729
Map4k4	FB-M6	#B3823E	-0.0314688	0.0622054	-0.0468248	0.0841952	0.0345163	0.173721	0.13206	0.0857763	0.106649
Me3	FB-M6	#B3823E	-0.107537	0.122535	-0.0526251	0.0643245	-0.0415237	0.157021	0.119364	0.007139	0.0253998
Mid1	FB-M6	#B3823E	-0.0330577	0.151692	-0.0990412	0.0438907	0.0172858	0.261206	0.133297	0.133292	0.127914
Mme	FB-M6	#B3823E	-0.0581631	0.0914728	-0.0121287	0.0161247	-0.0330666	0.167889	0.0426904	0.0099189	0.0333403
Nalcn	FB-M6	#B3823E	-0.127463	0.204964	-0.09347	0.0725491	0.0937066	0.259191	0.168943	0.072706	0.07503
Nkain2	FB-M6	#B3823E	-0.114196	-0.00323557	-0.0467302	0.0308317	-0.0150273	0.502488	0.0361306	-0.0106698	0.0214411
Nrip1	FB-M6	#B3823E	0.0145527	-0.00790075	-0.027217	0.0807028	0.0603037	0.150603	0.0675104	0.0772322	0.0933912
Ntf3	FB-M6	#B3823E	-0.0955779	0.0404589	-0.0361515	0.0242618	-0.0172436	0.237061	0.0648583	-0.00270558	0.0100818
Pappa	FB-M6	#B3823E	-0.140015	0.0230555	-0.0867599	0.0529309	0.0473545	0.293092	0.0999662	0.0200545	0.00184374
Papss2	FB-M6	#B3823E	-0.00090744	-0.0201008	-0.07194	0.0611253	0.0537522	0.204634	0.0660619	0.0549	0.0650686
Pdlim3	FB-M6	#B3823E	-0.116185	-0.0376363	-0.123729	0.151182	0.135302	0.349002	0.173819	0.068021	0.0509322
Phactr1	FB-M6	#B3823E	-0.0108825	0.0509148	0.0203628	0.0187311	0.0640744	0.176919	0.0153604	0.0547638	0.0862077
Phactr4	FB-M6	#B3823E	-0.0384985	0.0969044	0.0183155	0.00328747	-0.00272827	0.145491	0.0216893	-0.000806967	0.0573217
Pid1	FB-M6	#B3823E	-0.0775527	0.13802	-0.0324426	0.0671908	0.0927231	0.363632	0.114145	0.110927	0.118153
Ppp2r3a	FB-M6	#B3823E	-0.0411127	0.102507	-0.0371301	0.0904699	0.0219519	0.137061	0.0844977	0.0649981	0.0912694
Prkd1	FB-M6	#B3823E	-0.0127021	-0.0161766	-0.0488058	0.0910125	0.0669096	0.195509	0.0893687	0.0373764	0.0592043
Ptprk	FB-M6	#B3823E	-0.109157	0.0598286	-0.0771318	0.133182	0.0673704	0.144365	0.139452	0.0591729	0.0482579
Reps2	FB-M6	#B3823E	0.0177447	0.0772602	-0.021702	0.0230228	0.0173146	0.142186	0.0559863	0.0846206	0.0890441
Ripor3	FB-M6	#B3823E	-0.128707	0.0766079	-0.0246255	0.00490386	-0.00154478	0.218889	0.0361462	-0.0197077	-0.0159277
Rps12	FB-M6	#B3823E	-0.046251	-0.0343095	-0.0668153	0.0517887	-0.0210415	0.0717192	0.056272	-0.0280458	-0.0428468
Runx1t1	FB-M6	#B3823E	-0.0430167	0.174031	-0.0173661	0.0286376	0.0792034	0.203885	0.099231	0.120619	0.125893
Slc10a6	FB-M6	#B3823E	-0.0363362	0.0570058	-0.063828	0.0308182	-0.0181358	0.21263	0.111519	0.032723	0.0498508
Slc16a2	FB-M6	#B3823E	-0.0483994	-0.0010826	-0.0229545	0.0699505	0.0398462	0.17373	0.0637413	0.0705936	0.073466
Slc43a3	FB-M6	#B3823E	-0.02855	0.119441	-0.056641	0.0677612	-0.0535497	0.264714	0.148784	0.0152047	0.086197
Slit3	FB-M6	#B3823E	-0.0270047	-0.0458824	0.0168365	-0.00449385	-0.0523736	0.474453	-0.0143823	-0.0366321	0.0307395
Spon1	FB-M6	#B3823E	-0.247888	0.26108	-0.097367	0.0745495	-0.00871141	0.358204	0.182287	0.0143277	0.0694294
Spta1	FB-M6	#B3823E	-0.035149	0.0357117	0.00328993	0.0400962	-0.012944	0.237514	0.0297395	0.0011531	0.0403426
Stim1	FB-M6	#B3823E	0.0367659	0.0924562	-0.0246115	0.0327894	0.0375988	0.175422	0.081059	0.0980476	0.125785
Sytl2	FB-M6	#B3823E	0.0230774	0.00864813	-0.0229364	-0.00048503	0.0105591	0.160631	0.0325449	0.0407105	0.0510533
Thsd7a	FB-M6	#B3823E	-0.0797753	0.199278	-0.0608537	0.0219647	-0.0126525	0.48319	0.135158	0.108794	0.12674
Tmtc1	FB-M6	#B3823E	-0.00629744	0.0421645	-0.0367948	0.091161	0.0510312	0.275105	0.0786946	0.0641428	0.0889785
Tox	FB-M6	#B3823E	-0.0813385	0.0371385	-0.0796024	0.056851	0.00328612	0.273626	0.109424	0.0262284	0.0292748
Uty	FB-M6	#B3823E	-0.00790898	0.00307752	-0.0344854	0.122718	-0.0144651	0.27265	0.10123	0.0111458	0.0924054
Vegfd	FB-M6	#B3823E	-0.0179559	-0.0280886	-0.0194941	0.00924798	0.0314659	0.260838	0.00493029	0.0334996	0.0295852
Vgll3	FB-M6	#B3823E	-0.0355824	0.114082	-0.0930198	0.0477347	-0.000686796	0.316388	0.162213	0.105222	0.101947
Ccn2	FB-M7	#0F8299	0.000831546	-0.0243647	-0.124917	0.0853146	0.0947197	0.0684115	0.167205	0.0650372	0.0160775
Per1	FB-M7	#0F8299	-0.0471698	0.0758171	-0.0963407	0.0694607	0.00374005	0.0366371	0.230923	0.0502728	0.0260855
Serpine1	FB-M7	#0F8299	-0.0206073	0.118146	-0.0435271	0.0429053	0.0137802	0.00973989	0.150172	0.032825	0.0527576
Actb	FB-M7	#0F8299	-0.0690799	0.0297345	-0.187242	0.160917	-0.008542	0.0811347	0.343309	0.0838582	0.0197614
Actg1	FB-M7	#0F8299	-0.0655587	0.0147803	-0.17458	0.191601	-0.0139025	0.0871302	0.313746	0.0488489	0.013758
Actr3	FB-M7	#0F8299	0.00405155	0.0906374	-0.136852	0.10989	0.0216072	0.0986951	0.297318	0.124843	0.127009
Adamts1	FB-M7	#0F8299	-0.0350578	0.0192111	-0.0684249	0.0358395	0.0171835	0.0401502	0.136069	0.030042	0.00864513
Adk	FB-M7	#0F8299	-0.121328	0.137408	-0.12234	0.143374	0.0625299	0.12013	0.195658	0.0975876	0.0605742
Aopep	FB-M7	#0F8299	0.0405979	-0.0121079	-0.258379	0.00689722	0.0626234	-0.0312086	0.123337	0.103387	-0.0223409
Apoe	FB-M7	#0F8299	-0.200086	0.0149594	-0.160601	0.114434	0.0249587	0.156771	0.218207	0.0210742	-0.0509066
Arf4	FB-M7	#0F8299	0.0124024	0.0720052	-0.067663	0.0480963	0.0209561	0.0548441	0.178165	0.0912842	0.127292
Arhgap6	FB-M7	#0F8299	-0.0925788	0.234987	-0.133614	0.0769671	0.0467356	0.160461	0.219809	0.171297	0.130393
Arl5b	FB-M7	#0F8299	0.0185665	0.0560181	-0.0901056	0.0489622	0.0116367	0.0768864	0.188226	0.0943516	0.0885954
Armh3	FB-M7	#0F8299	-0.0291079	0.0265236	-0.136658	0.0189391	0.00905238	0.0432405	0.105641	0.0357192	0.00645764
Arpc4	FB-M7	#0F8299	-0.0167644	0.0422261	-0.0794133	0.053538	-0.00789741	0.0471977	0.147704	0.0403439	0.0349974
Arrdc3	FB-M7	#0F8299	-0.0727899	0.0800032	-0.146654	0.0943754	0.075332	0.0992754	0.216894	0.113277	0.046625
Asah2	FB-M7	#0F8299	-0.031224	0.0636728	-0.0699758	0.0134564	0.0272393	0.0514476	0.0922669	0.0492933	0.0295578
Atf2	FB-M7	#0F8299	0.0293834	0.0627613	-0.041087	0.0582213	0.0617605	0.0318297	0.08783	0.113715	0.108598
Atf7	FB-M7	#0F8299	-0.00542167	0.0223604	-0.21559	0.00412822	0.00859037	0.0819921	0.131803	0.0752864	0.018648
B3gnt2	FB-M7	#0F8299	-0.049156	0.0650522	-0.113056	0.0422451	0.0203725	0.0487652	0.187971	0.0491166	0.0285895
Bcl2l1	FB-M7	#0F8299	0.000618443	0.147023	-0.0785443	0.0672047	-0.00304404	0.0277061	0.15925	0.0879204	0.102836
Bcl9	FB-M7	#0F8299	-0.0528644	0.0250973	-0.0540987	0.0922455	0.0411395	0.0460071	0.0896693	0.0485338	0.0258164
Braf	FB-M7	#0F8299	0.00407469	0.0781697	-0.051166	0.0608188	0.0539408	0.0638567	0.11505	0.105131	0.118259
Btg2	FB-M7	#0F8299	-0.172755	0.177804	-0.256259	0.12006	-0.00114061	0.0761599	0.461783	0.0927748	-0.0032681
Cacna2d1	FB-M7	#0F8299	0.026332	0.0427433	-0.0727789	0.124831	0.110846	-0.00923371	0.13076	0.146598	0.120843
Calu	FB-M7	#0F8299	0.0463162	0.0596873	-0.0452057	0.0400343	0.0180781	0.025464	0.148408	0.104394	0.121819
Camk2d	FB-M7	#0F8299	-0.00570905	0.0756354	-0.0947578	0.142801	0.0454258	0.0551463	0.169798	0.120371	0.108451
Ccn1	FB-M7	#0F8299	-0.220513	0.233107	-0.356201	0.182642	-0.0249105	0.168177	0.590913	0.120269	0.00980164
Cebpb	FB-M7	#0F8299	-0.0425752	0.02818	-0.1089	0.0690367	0.00529198	0.0546212	0.187589	0.0395149	0.0131636
Cebpd	FB-M7	#0F8299	-0.0319648	0.063252	-0.123736	0.0628192	0.0121297	0.119135	0.167055	0.0867892	0.0357681
Clasp2	FB-M7	#0F8299	0.0531921	0.0784071	-0.0715785	0.0968701	0.0837684	0.0876937	0.150108	0.164929	0.160921
Clic4	FB-M7	#0F8299	0.0267962	0.0259856	-0.0991932	0.0622356	-0.00634718	0.0343942	0.219033	0.0700179	0.0693832
Cnn2	FB-M7	#0F8299	-0.0436596	0.0656694	-0.138881	0.0708068	-0.0209951	0.090482	0.265024	0.0605873	0.0404328
Coq10b	FB-M7	#0F8299	0.0318906	0.024726	-0.0545805	0.0407905	0.00757122	0.00335915	0.157707	0.0455527	0.0483715
Cox16	FB-M7	#0F8299	-0.024255	0.0480467	-0.19754	-0.0177255	0.00256831	0.0438373	0.119789	0.0579689	-0.010006
Cp	FB-M7	#0F8299	-0.125758	0.167816	-0.171203	0.133743	0.00331179	0.302168	0.336302	0.123016	0.113598
Crispld2	FB-M7	#0F8299	-0.111156	0.115527	-0.1952	-0.0154866	-0.0396679	0.127689	0.121364	0.00454666	-0.0450444
Crppa	FB-M7	#0F8299	0.0274865	0.00799043	-0.130262	-0.00522536	0.00426581	0.00758661	0.0812714	0.0766253	0.0125248
Csrp1	FB-M7	#0F8299	-0.0354522	0.0380217	-0.0811698	0.0288096	0.0263476	0.0684212	0.178351	0.057537	0.0313145
Cstf3	FB-M7	#0F8299	0.0394063	0.0358524	-0.0811168	0.0559178	0.0453208	0.0379978	0.154197	0.114252	0.102088
Ctnnd1	FB-M7	#0F8299	-0.0585249	0.101424	-0.209898	0.027828	-0.00252718	0.0839569	0.229229	0.0630425	0.0153406
Cttnbp2nl	FB-M7	#0F8299	0.00815558	0.0932628	-0.0592	0.0298664	0.0273209	0.026163	0.161734	0.0841364	0.0861366
Cxcl1	FB-M7	#0F8299	-0.0768415	0.114364	-0.113309	0.00602658	-0.00643843	-0.00652623	0.203983	0.0390206	-0.00303689
Cxcl14	FB-M7	#0F8299	-0.0972755	0.0537124	-0.121882	0.0423978	-0.0294163	0.104392	0.184785	0.0429342	-0.00103994
Ddx3x	FB-M7	#0F8299	-0.0121651	0.0512883	-0.0134422	0.0310626	0.0215039	-0.00330373	0.0959504	0.0431145	0.0509992
Dhrs3	FB-M7	#0F8299	-0.024531	-0.00313644	-0.0487007	0.0814445	0.0766028	0.0901634	0.109445	0.0623341	0.0457388
Diaph2	FB-M7	#0F8299	0.0521165	0.117526	-0.075824	0.0994962	0.089923	0.0857994	0.147865	0.202194	0.200222
Dnajb4	FB-M7	#0F8299	-0.070124	0.0842212	-0.118412	0.104926	0.0268455	0.0749482	0.243395	0.0728165	0.0444939
Dop1a	FB-M7	#0F8299	-0.0155629	0.0412334	-0.162216	0.0240734	-0.00461133	0.0609699	0.117415	0.0608964	0.022024
Dstn	FB-M7	#0F8299	-0.00308633	0.00307588	-0.0447633	0.0554501	0.0287889	0.0443679	0.112574	0.0435152	0.0316849
Dusp1	FB-M7	#0F8299	-0.0429616	0.0527281	-0.17912	0.109883	0.00325799	0.0327773	0.281172	0.0919052	-0.0076655
Ecpas	FB-M7	#0F8299	-0.0303502	0.0416008	-0.213619	0.0364516	-0.0133759	0.115221	0.150632	0.0626608	0.019161
Egr1	FB-M7	#0F8299	-0.211611	0.226096	-0.448181	0.265285	0.0172225	0.204932	0.689758	0.212543	0.0680732
Eif4a2	FB-M7	#0F8299	-0.00692893	0.0259899	-0.052041	0.118792	0.031206	0.0249988	0.15075	0.0662734	0.0645827
Ell2	FB-M7	#0F8299	-0.0348948	0.0286305	-0.0433097	0.0578212	0.0203143	0.034781	0.115608	0.0315176	0.0206686
Emd	FB-M7	#0F8299	-0.0394609	0.070662	-0.0921154	0.0387138	0.017269	0.0291599	0.187686	0.0460984	0.0309365
Errfi1	FB-M7	#0F8299	-0.166044	0.170433	-0.461743	0.247158	0.0106965	0.238746	0.689382	0.236345	0.0685155
Esyt2	FB-M7	#0F8299	0.0971964	0.0901042	-0.0529707	0.0462167	0.0406562	0.0547723	0.167641	0.156767	0.172408
Etf1	FB-M7	#0F8299	0.0133473	0.0579126	-0.0689959	0.0442119	-0.00128622	0.0782571	0.180196	0.0582981	0.0945803
F2r	FB-M7	#0F8299	-0.00227275	0.0741421	-0.0860449	0.0480737	0.0502038	-0.0234654	0.171948	0.0755183	0.0417734
F3	FB-M7	#0F8299	-0.0225041	-0.00285798	-0.0702236	0.0465696	0.0424582	0.0808754	0.117553	0.0547292	0.0242395
Fam129a	FB-M7	#0F8299	0.0302291	0.142918	-0.0336248	0.0234193	0.0477862	0.0866476	0.118476	0.117713	0.129899
Fermt2	FB-M7	#0F8299	0.00115017	0.0923535	-0.0451323	0.0588161	0.0260651	0.0411137	0.163648	0.0813965	0.0998003
Fggy	FB-M7	#0F8299	-0.0848502	0.0934024	-0.0521706	0.0513661	0.0314268	0.104413	0.111071	0.0514098	0.0385648
Fhit	FB-M7	#0F8299	-0.00828951	0.0652813	-0.0641989	0.0666773	0.0778312	0.0773564	0.119395	0.113531	0.0786861
Filip1l	FB-M7	#0F8299	-0.071066	0.0733513	-0.15392	0.245183	0.0410415	0.137367	0.32192	0.0988209	0.0789478
Fosl2	FB-M7	#0F8299	-0.0154259	0.0581173	-0.0923277	0.0701389	-0.00458356	0.0737828	0.215504	0.0540639	0.0539957
Frmd6	FB-M7	#0F8299	-0.0149908	0.152527	-0.0465109	0.0163497	0.0162999	0.0662564	0.144628	0.0975379	0.0928613
Gas1	FB-M7	#0F8299	0.00750892	0.0699039	-0.0957841	0.0769417	0.0477442	-0.0100607	0.170732	0.0950276	0.0524509
Gask1b	FB-M7	#0F8299	-0.118578	0.105705	-0.211122	0.0374352	0.0366314	0.165681	0.203854	0.0827058	0.0098208
Gem	FB-M7	#0F8299	-0.004103	0.0351691	-0.0806295	0.0381717	0.0495869	0.00684139	0.149094	0.0821932	0.0353032
Glcci1	FB-M7	#0F8299	0.0191322	0.0201036	-0.173309	-0.0074144	0.00834303	0.0563212	0.100319	0.10375	0.00680122
Gpbp1	FB-M7	#0F8299	-0.00514525	0.0501928	-0.145163	0.0348762	0.0131478	0.0487115	0.134469	0.0760469	0.0574501
Gpcpd1	FB-M7	#0F8299	-0.115585	0.0988462	-0.14963	0.178441	0.0506964	0.0555026	0.240849	0.103711	0.051696
Gpx3	FB-M7	#0F8299	-0.0660239	0.042482	-0.0748548	0.0494127	0.00322246	0.106253	0.132218	0.0414873	0.0120483
Gsn	FB-M7	#0F8299	0.0909134	-0.132111	-0.120089	0.0792087	0.10603	-0.0105934	0.133647	0.160539	0.0141399
Gulp1	FB-M7	#0F8299	-0.0252793	0.171782	-0.0588508	0.0485144	0.106064	0.167857	0.132426	0.190179	0.155184
H3f3b	FB-M7	#0F8299	-0.0761435	0.0364378	-0.147896	0.117727	0.00349098	0.0944203	0.219981	0.0641164	0.0267363
Hccs	FB-M7	#0F8299	-0.0347879	0.0582472	-0.0773152	0.0623051	0.0194231	0.035592	0.11741	0.0616176	0.0445037
Hnrnpa3	FB-M7	#0F8299	-0.0134886	0.0572423	-0.115069	0.11327	0.0180895	0.0623066	0.211611	0.100418	0.0989025
Hnrnph1	FB-M7	#0F8299	-0.0117764	0.0460536	-0.0269758	0.0939684	0.0375352	0.0543937	0.117324	0.0770382	0.0952409
Hnrnpu	FB-M7	#0F8299	-0.0030112	0.039038	-0.0480174	0.102443	0.0335341	0.0576929	0.145851	0.0726742	0.0929694
Id3	FB-M7	#0F8299	-0.0668265	0.0521005	-0.145984	0.0687221	0.0445863	0.00638795	0.230232	0.0763232	-0.0109724
Ier2	FB-M7	#0F8299	-0.0812729	0.0719502	-0.200911	0.121952	-0.00612978	0.0614879	0.347945	0.0810683	0.00888084
Ifi204	FB-M7	#0F8299	-0.0303589	0.0473929	-0.116097	0.0452288	-0.0209627	0.149035	0.151275	0.0622486	0.0366369
Ifrd1	FB-M7	#0F8299	-0.006316	0.0186698	-0.103389	0.0972013	0.0200342	0.045169	0.223938	0.0500013	0.0489665
Igfbp7	FB-M7	#0F8299	-0.0604392	0.172725	-0.0688137	0.0402087	0.0885213	0.0352793	0.177872	0.10977	0.103995
Irf2bp2	FB-M7	#0F8299	-0.0228403	0.0466573	-0.115791	0.0803415	0.0493265	-0.000911836	0.164158	0.11255	0.0419511
Itgb1	FB-M7	#0F8299	-0.00994716	0.14641	-0.0751205	0.0702497	-0.000707918	0.0942379	0.2574	0.119658	0.133712
Itprid2	FB-M7	#0F8299	-0.0355508	0.109124	-0.165332	-0.0297139	0.0171568	0.049777	0.123083	0.0630499	0.0151623
Junb	FB-M7	#0F8299	-0.0454798	0.0612818	-0.194563	0.106684	0.0286926	0.0143244	0.34594	0.103255	0.0196848
Kansl1l	FB-M7	#0F8299	-0.0143387	0.0451916	-0.0626908	0.116103	0.0699195	0.0643068	0.107434	0.115449	0.094155
Khdc4	FB-M7	#0F8299	-0.0358796	0.0433225	-0.142932	0.0233744	-0.00857855	0.0604099	0.117437	0.0299044	0.00749495
Klf7	FB-M7	#0F8299	0.0730137	0.0594046	-0.0715039	0.0809015	0.0635347	0.0532742	0.180132	0.157236	0.137375
Klf9	FB-M7	#0F8299	-0.0851162	0.203605	-0.152411	0.0968977	0.00877188	0.114446	0.307592	0.114776	0.106997
Lima1	FB-M7	#0F8299	0.0574813	0.0763721	-0.119591	0.0403749	-0.00269961	0.065812	0.246249	0.125359	0.108109
Lrrc4	FB-M7	#0F8299	-0.0117939	0.0483012	-0.123799	0.0739343	0.0193606	0.0174605	0.128381	0.0768006	0.0641503
Lrrc8a	FB-M7	#0F8299	-0.0692598	0.106399	-0.148601	0.0562303	-0.0345914	0.0827375	0.243215	0.0383201	0.0360346
Lsamp	FB-M7	#0F8299	-0.0612354	0.129458	-0.12871	0.0450023	0.194204	-0.00197072	0.185492	0.224421	0.0747547
Luc7l2	FB-M7	#0F8299	-0.000216201	0.120085	-0.14829	0.150545	0.0883708	0.066764	0.224061	0.204329	0.155466
Lysmd4	FB-M7	#0F8299	0.00355033	0.00838044	-0.117452	0.125346	0.0448867	0.0319903	0.122939	0.0909324	0.0510341
Mamld1	FB-M7	#0F8299	0.00614871	0.080564	-0.0627927	0.0750144	0.0418457	0.118218	0.136853	0.107585	0.114095
Mapre1	FB-M7	#0F8299	0.0161567	0.0378608	-0.0610143	0.0499971	0.0131881	0.034027	0.153832	0.0670508	0.0614437
Mat2a	FB-M7	#0F8299	0.0139419	0.0871158	-0.0625539	0.0701534	-0.0498444	0.0105174	0.142945	0.0508046	0.0663794
Mbnl1	FB-M7	#0F8299	0.061078	0.0367079	-0.0510714	0.130618	0.0956614	0.093362	0.172731	0.175735	0.174104
Mcl1	FB-M7	#0F8299	0.0294901	0.0380944	-0.031796	0.0818087	0.0350177	0.00942344	0.1344	0.0852002	0.0810516
Mfsd4a	FB-M7	#0F8299	0.00236287	0.0411685	-0.0858868	0.0586743	0.0238791	0.00167428	0.118345	0.0648971	0.0523748
Mgp	FB-M7	#0F8299	-0.144573	0.0775124	-0.123669	0.101313	0.152572	-0.0197688	0.17565	0.11478	-0.00701188
Mob3a	FB-M7	#0F8299	-0.0174621	0.053386	-0.0544344	0.0327375	-0.000264393	0.0511806	0.137721	0.0371555	0.0412738
Mpp7	FB-M7	#0F8299	0.000224934	0.0344067	-0.0239905	0.0323493	0.0465804	0.0230511	0.109607	0.0719279	0.0659161
Msrb3	FB-M7	#0F8299	0.00514214	0.0829822	-0.0573911	0.0816469	0.0332375	0.0545687	0.162512	0.0799721	0.10336
Myh9	FB-M7	#0F8299	-0.0346201	0.154577	-0.0999546	0.0548491	-0.014239	0.0155559	0.282344	0.0578591	0.0716763
Myl12a	FB-M7	#0F8299	-0.0731325	0.0614475	-0.126683	0.11674	-0.0107336	0.0730438	0.232534	0.0447833	0.0347246
Nampt	FB-M7	#0F8299	-0.0736578	0.00900811	-0.0899468	0.0852369	-0.0130935	0.10402	0.133427	0.0110855	0.00444829
Negr1	FB-M7	#0F8299	-0.0925234	0.132164	-0.0906505	0.0434136	0.103114	0.129393	0.132842	0.17659	0.0775585
Nfia	FB-M7	#0F8299	-0.0160546	0.181029	-0.123607	0.110572	0.142055	0.185782	0.196846	0.229077	0.191051
Nfib	FB-M7	#0F8299	-0.0153243	0.14981	-0.105833	0.0978414	0.139624	0.1321	0.160426	0.211231	0.175425
Nfkbiz	FB-M7	#0F8299	0.0685286	0.0172134	-0.0727132	0.0468066	0.0381214	0.00849894	0.159009	0.115813	0.0900491
Nr3c2	FB-M7	#0F8299	-0.0631702	0.0599209	-0.0749895	0.143837	0.0979824	0.064091	0.138536	0.105791	0.0650348
Nr4a1	FB-M7	#0F8299	-0.178833	0.137446	-0.312709	0.126903	0.037977	0.0957921	0.550319	0.136633	-0.0175017
Nr4a3	FB-M7	#0F8299	-0.0640226	0.0777535	-0.161195	0.0664366	0.0264948	0.0706698	0.352527	0.0784361	0.0306725
Oga	FB-M7	#0F8299	-0.0177776	0.0219775	-0.160955	0.00399762	-0.00243867	0.0514628	0.107228	0.0525113	-0.00399911
Oxnad1	FB-M7	#0F8299	-0.0289095	0.0578485	-0.0835193	0.0537097	0.0183709	0.0370563	0.171676	0.0657681	0.0482906
Pcdh9	FB-M7	#0F8299	-0.0985026	0.290283	-0.157768	0.0307944	0.0588782	0.161591	0.231644	0.227818	0.124879
Pde1c	FB-M7	#0F8299	-0.0940715	0.158464	-0.125837	0.109636	0.0495477	-0.0084442	0.210672	0.0873665	0.0163001
Pde4b	FB-M7	#0F8299	-0.153302	0.131275	-0.259214	0.197541	0.0404624	0.149784	0.442547	0.112968	0.0480332
Pdlim5	FB-M7	#0F8299	0.0778273	-0.0423205	-0.102074	0.24253	0.0777216	0.0384681	0.256246	0.172497	0.148211
Phip	FB-M7	#0F8299	0.00833724	0.0727726	-0.0709437	0.0922377	0.0783844	0.0992479	0.128667	0.157555	0.141363
Picalm	FB-M7	#0F8299	0.0548439	0.0593658	-0.0899061	0.129465	0.0827919	0.0783313	0.200816	0.18316	0.153007
Plekho2	FB-M7	#0F8299	0.100072	0.00384706	-0.0464446	0.0363449	0.0212658	-8.88e-06	0.12466	0.0861069	0.0823494
Ppp1r12b	FB-M7	#0F8299	-0.0777277	0.0652259	-0.157601	0.238541	0.0464482	0.213973	0.267661	0.0907332	0.0990497
Prkg1	FB-M7	#0F8299	-0.1857	0.236059	-0.166156	0.114137	0.0624269	0.138771	0.261665	0.127059	0.0788018
Prkn	FB-M7	#0F8299	-0.0661319	0.0505071	-0.262622	0.0859804	0.0199478	0.0783266	0.223485	0.109277	-0.00522843
Ptbp2	FB-M7	#0F8299	0.0107622	0.079302	-0.0538958	0.0959268	0.0743814	0.0465385	0.141803	0.142193	0.135575
Pten	FB-M7	#0F8299	-0.0863233	0.183671	-0.0740232	0.0879177	0.0139829	0.169677	0.180894	0.0939363	0.131824
Rapgef5	FB-M7	#0F8299	-0.108721	0.101987	-0.0508202	0.0614743	0.0214265	0.11876	0.133445	0.021909	0.0359129
Rbm39	FB-M7	#0F8299	-0.00386627	0.0590156	-0.0882454	0.0745514	0.026431	0.0823839	0.121254	0.0965614	0.1065
Rbm4	FB-M7	#0F8299	-0.0155887	0.0240209	-0.109425	-0.00195394	-0.00609563	0.0329782	0.0928783	0.0369059	0.0158309
Rbpms	FB-M7	#0F8299	-0.159651	0.213173	-0.13747	0.13642	-0.0177366	0.221768	0.288266	0.0536676	0.0859953
Relch	FB-M7	#0F8299	-0.0179639	0.0573302	-0.191366	0.0282038	0.0094761	0.0762867	0.149978	0.0895094	0.0417191
Resf1	FB-M7	#0F8299	-0.0536807	0.018879	-0.141452	0.05617	0.000217192	0.0851646	0.129888	0.030985	0.00320078
Rheb	FB-M7	#0F8299	-0.00661135	0.0350925	-0.0537052	0.0438926	0.0127134	0.0549484	0.132866	0.0457246	0.0578703
Rhobtb1	FB-M7	#0F8299	-0.0970259	0.0139713	-0.0975685	0.142793	0.0405994	0.154343	0.151966	0.062938	0.0269541
Rhoj	FB-M7	#0F8299	-0.0684417	0.234226	-0.144798	0.0297495	-0.0421843	0.168848	0.303341	0.101559	0.0931744
Rlim	FB-M7	#0F8299	0.00750182	0.0563818	-0.0472291	0.0490449	0.0108106	0.0402965	0.106227	0.0664131	0.0666049
Rprd1a	FB-M7	#0F8299	-0.02403	0.0305872	-0.0544483	0.0841528	0.0397792	0.0699993	0.108867	0.0641893	0.0704151
Sat1	FB-M7	#0F8299	-0.0419493	0.0648902	-0.0826534	0.0217949	-0.01654	0.0386966	0.16528	0.0317847	0.0179921
Serinc3	FB-M7	#0F8299	-0.0666056	0.0794973	-0.03705	0.0767241	-0.000399784	0.0750063	0.142698	0.0131372	0.0431054
Setd5	FB-M7	#0F8299	0.0476348	0.0979492	-0.0717346	0.0889054	0.0586783	0.0674672	0.154602	0.168453	0.178649
Sgcd	FB-M7	#0F8299	-0.200254	0.15878	-0.133533	0.0679042	0.012285	0.328515	0.161729	0.0994706	0.0329674
Sgip1	FB-M7	#0F8299	-0.0420878	0.135918	-0.0609725	0.0379403	0.0431985	0.00303997	0.134447	0.0668568	0.0522853
Sh3bgrl	FB-M7	#0F8299	0.000128498	0.128468	-0.0915024	0.051385	0.027708	0.0707469	0.189488	0.135014	0.124607
Sik1	FB-M7	#0F8299	-0.0290681	0.0808937	-0.128517	0.0559592	0.0396022	-0.000173356	0.243652	0.100417	0.0356374
Slc12a6	FB-M7	#0F8299	-0.0177178	0.0656339	-0.182902	0.0215423	-9.51e-05	0.0755788	0.133652	0.0724585	0.0167093
Slc8a1	FB-M7	#0F8299	-0.0509841	0.121203	-0.154049	0.247933	0.0693044	0.13891	0.275317	0.137829	0.0971975
Smarca1	FB-M7	#0F8299	-0.0506738	0.0624189	-0.0523531	0.0400616	0.0162394	0.0788938	0.0912623	0.0436847	0.0405809
Spry1	FB-M7	#0F8299	-0.0666889	0.160959	-0.0627454	0.0543267	0.0314546	0.0559994	0.154244	0.0708405	0.0743035
Spry2	FB-M7	#0F8299	-0.0313711	0.109248	-0.0862045	0.00787652	0.00373897	-0.0138683	0.148741	0.0760493	0.0380356
Srsf5	FB-M7	#0F8299	-0.0385455	0.0338062	-0.0159116	0.107084	0.0108901	0.0382454	0.120481	0.032361	0.0437802
Stard13	FB-M7	#0F8299	-0.0811334	0.0847002	-0.166765	0.0623159	0.00662008	0.123471	0.171494	0.0439371	0.0215272
Strn3	FB-M7	#0F8299	0.051855	0.110556	-0.0744494	0.0923655	0.0600931	0.0634684	0.154659	0.173105	0.188008
Syn3	FB-M7	#0F8299	-0.122619	0.132472	-0.157422	0.0852825	-0.0152813	0.162399	0.282534	0.0307823	0.035986
Synpo2	FB-M7	#0F8299	-0.0712306	0.0313842	-0.111448	0.153377	0.0853914	0.0179512	0.156218	0.10197	0.0314083
Tasor	FB-M7	#0F8299	-0.0218683	0.0366689	-0.221698	0.0170145	0.0227613	0.0525002	0.144518	0.0843513	0.0107633
Tbx20	FB-M7	#0F8299	0.0125821	0.106677	-0.130681	0.105519	0.155881	0.00597068	0.229925	0.223077	0.142795
Tent2	FB-M7	#0F8299	-0.0180403	0.0413212	-0.18049	0.0457606	0.016487	0.0565604	0.156526	0.0927786	0.0322637
Tgfb1i1	FB-M7	#0F8299	0.0375687	0.0568972	-0.0797846	0.04345	0.00457858	0.034268	0.181936	0.0813047	0.0863429
Thbs1	FB-M7	#0F8299	-0.0928303	0.179383	-0.249243	0.151868	-0.0207752	0.0700295	0.50308	0.115975	0.0885306
Timp3	FB-M7	#0F8299	-0.144213	0.177591	-0.132153	0.0624262	-0.0198586	0.211078	0.269278	0.023498	0.0415663
Tm4sf1	FB-M7	#0F8299	-0.0662745	0.0931446	-0.0868061	0.058988	-0.0086769	0.0300885	0.173955	0.0375257	0.0349036
Tmem123	FB-M7	#0F8299	-0.0512281	0.0972469	-0.100128	0.0557384	0.00151462	0.0988876	0.230622	0.0674496	0.0646456
Tmsb4x	FB-M7	#0F8299	-0.0389845	-0.0203407	-0.0510127	0.0721544	-0.0220623	0.0225927	0.108607	-0.0110131	-0.0276605
Top1	FB-M7	#0F8299	0.00085415	0.0597769	-0.0793782	0.0810888	0.0271882	0.065077	0.147341	0.106773	0.110521
Tra2b	FB-M7	#0F8299	-0.00288788	0.0378316	-0.0370068	0.0731704	0.0298512	0.05823	0.13029	0.0722498	0.0892253
Trhde	FB-M7	#0F8299	-0.0534467	0.166932	-0.0657591	0.00291044	0.0534638	-0.0190506	0.0992002	0.112331	0.0472692
Tut4	FB-M7	#0F8299	-0.0378002	0.0650085	-0.192347	0.0165637	-0.00205543	0.0737032	0.131609	0.0602695	0.0151939
Ubc	FB-M7	#0F8299	-0.0468933	-0.000163518	-0.017551	0.0670348	-0.0222461	0.0427527	0.122214	-0.0177269	-0.0115646
Ube2b	FB-M7	#0F8299	-0.0718213	0.0230202	-0.15547	0.0781688	-0.0258541	0.0643385	0.137981	0.015828	-0.0250174
Ube2d3	FB-M7	#0F8299	0.0206731	0.0644002	-0.0888051	0.105622	0.0324119	0.0783472	0.191164	0.123335	0.12353
Umad1	FB-M7	#0F8299	0.0308785	0.0414309	-0.17321	-0.00102818	0.0207065	0.0226876	0.110032	0.0985273	0.0296701
Usp50	FB-M7	#0F8299	-0.00418604	0.0202135	-0.0835677	0.0621811	0.0219535	0.025335	0.0953204	0.0534775	0.0414674
Vcl	FB-M7	#0F8299	-0.0115512	0.0671442	-0.158887	0.137611	0.0422424	0.075574	0.329385	0.132713	0.0912411
Vim	FB-M7	#0F8299	0.0887807	0.0148785	-0.0753788	0.0465821	0.0752894	-0.00778438	0.139888	0.130222	0.0817844
Vmp1	FB-M7	#0F8299	0.0148727	0.0437166	-0.154556	0.116343	0.0121706	0.0748324	0.276889	0.113735	0.0907317
Wdr1	FB-M7	#0F8299	-0.0140855	0.0290605	-0.0583765	0.0342083	-0.00816328	0.0509384	0.139464	0.0402025	0.0314625
Wsb1	FB-M7	#0F8299	-0.0436668	0.10061	-0.0987493	0.0718141	0.0314384	0.0951199	0.229553	0.0873294	0.0890265
Ywhaz	FB-M7	#0F8299	0.0159145	0.0407065	-0.0579821	0.0552451	0.0167929	0.0816477	0.165413	0.0898681	0.0951549
Zeb2	FB-M7	#0F8299	0.026662	0.0976337	-0.095247	0.0416913	0.0644861	0.0986675	0.152016	0.172042	0.132643
Zfp36	FB-M7	#0F8299	-0.0993877	0.084653	-0.175068	0.111439	0.00484159	0.0629603	0.307496	0.0904697	0.0138187
Zfp445	FB-M7	#0F8299	-0.0562658	0.0723269	-0.0319535	0.0983376	0.0287395	0.07465	0.115641	0.053874	0.0669175
Zfp869	FB-M7	#0F8299	-0.0274253	0.0432095	-0.0688549	0.0104648	0.0128207	0.0389642	0.0894483	0.0271125	0.00641647
Zswim6	FB-M7	#0F8299	0.0128299	0.0365025	-0.148895	0.00683372	0.00294485	0.024035	0.131892	0.050758	0.0184765
Col5a2	FB-M8	#78B33E	0.105636	0.0793233	-0.0347728	0.0379312	0.137624	0.0624167	0.0945759	0.27099	0.170982
Adamts12	FB-M8	#78B33E	0.170738	-0.094677	-0.0327881	0.060047	0.139471	0.0301666	0.0621504	0.278228	0.156154
Agmo	FB-M8	#78B33E	0.0599569	0.15466	-0.0356883	0.0309043	0.0955236	0.0373734	0.115457	0.271822	0.17204
Akt3	FB-M8	#78B33E	0.106012	0.133562	-0.0442374	0.092316	0.131364	0.055962	0.139565	0.353277	0.242129
Ankrd28	FB-M8	#78B33E	0.073679	0.0120641	-0.0108416	0.0507589	0.109366	-0.0178077	0.0395132	0.180081	0.12247
Arhgap32	FB-M8	#78B33E	0.0601355	0.0792831	-0.0265076	0.0489155	0.0841353	0.0413008	0.0802845	0.223961	0.15948
B3galt1	FB-M8	#78B33E	0.0283324	0.0513989	-0.0530955	0.0705792	0.124202	0.132866	0.080752	0.261239	0.149468
Cask	FB-M8	#78B33E	0.0750271	0.105226	-0.0592946	0.0494603	0.0420213	0.0564894	0.10066	0.24165	0.179647
Cdk13	FB-M8	#78B33E	0.10119	0.0343603	-0.00587508	0.0536806	0.0637382	0.0225616	0.0507474	0.211214	0.174959
Cop1	FB-M8	#78B33E	0.0822368	0.0532198	-0.0255832	0.0648707	0.0823746	0.00127946	0.0751404	0.21322	0.149692
Cped1	FB-M8	#78B33E	0.0269207	0.129669	-0.0514271	0.0793817	0.160632	0.0972107	0.134255	0.281805	0.173659
Dlg1	FB-M8	#78B33E	0.0858401	0.0439266	-0.0246354	0.0777025	0.10748	0.000293543	0.0720848	0.230056	0.162555
Dpt	FB-M8	#78B33E	0.115628	-0.00695728	-0.0942178	0.0224345	0.0854892	0.040211	0.112477	0.212981	0.100108
Eda	FB-M8	#78B33E	0.0687947	0.0998184	-0.0512105	0.0480808	0.0713775	0.0516573	0.115151	0.230167	0.165762
Exoc4	FB-M8	#78B33E	0.0982785	0.0551869	-0.0246233	0.0775953	0.0885042	0.000669318	0.0813544	0.237472	0.174698
Exoc6b	FB-M8	#78B33E	0.101237	0.0887257	-0.0242643	0.0702462	0.063454	0.0409924	0.0746397	0.231158	0.188538
Fam172a	FB-M8	#78B33E	0.108242	0.0506419	-0.0191825	0.0654424	0.0808181	0.0453807	0.0746774	0.237295	0.169438
Fbxl17	FB-M8	#78B33E	0.0844777	0.0934345	-0.0389824	0.0938278	0.0799503	0.0537259	0.10285	0.244866	0.184698
Fhl1	FB-M8	#78B33E	0.1463	0.00165506	-0.0501353	0.023371	0.0538933	-0.083327	0.0801554	0.18714	0.100768
Foxp2	FB-M8	#78B33E	0.107319	0.0646897	-0.0605722	0.0793293	0.191685	0.0836023	0.100128	0.360064	0.190275
Gls	FB-M8	#78B33E	0.104355	0.0561653	-0.0406954	0.0725269	0.106967	0.00325369	0.110111	0.260501	0.182224
Gnaq	FB-M8	#78B33E	0.121492	0.0368045	-0.00351275	0.0390856	0.0988184	-0.00964525	0.0667283	0.208678	0.168258
Gsk3b	FB-M8	#78B33E	0.11702	0.0367322	-0.00487812	0.0432168	0.0692638	-0.00907748	0.0433721	0.207565	0.159135
Itih5	FB-M8	#78B33E	0.111274	0.0157676	0.0081995	0.021138	0.0965887	-0.0682921	0.0100118	0.162192	0.0975458
Kcnt2	FB-M8	#78B33E	0.216447	0.00370578	-0.118202	0.117352	0.230326	0.0936056	0.178702	0.450921	0.248662
Kdm6a	FB-M8	#78B33E	0.0548693	0.0586003	-0.00316441	0.0459745	0.076884	-0.0195877	0.0472372	0.197487	0.134193
Klf12	FB-M8	#78B33E	0.199638	-0.0553614	-0.0180993	0.0525784	0.13359	-0.0413947	0.0325418	0.265806	0.148495
Lpp	FB-M8	#78B33E	0.13005	0.0684252	-0.0204513	0.0822971	0.11438	0.0108581	0.0804682	0.265232	0.186896
Lum	FB-M8	#78B33E	0.0787625	-0.0186284	-0.047678	0.0328258	0.0919397	-0.0608976	0.0438369	0.184024	0.0612692
Mbd5	FB-M8	#78B33E	0.0411242	0.0908278	-0.0413645	0.0889028	0.0862667	0.0638005	0.0925498	0.222693	0.149942
Naaladl2	FB-M8	#78B33E	0.0919804	0.0864322	-0.0670145	0.0712802	0.10503	0.087123	0.117496	0.282497	0.17252
Nab1	FB-M8	#78B33E	0.0269904	0.0962712	-0.0411125	0.0103163	0.0448578	0.0480749	0.0961551	0.175066	0.102718
Nbea	FB-M8	#78B33E	0.0605159	0.0756141	-0.0310327	0.0900347	0.131688	0.0737191	0.102123	0.256077	0.189315
Nbeal1	FB-M8	#78B33E	0.0836799	0.0735665	-0.00630171	0.0693361	0.080271	0.0480529	0.0863118	0.212795	0.185119
Nox4	FB-M8	#78B33E	0.0532995	0.0623609	-0.0255298	0.0475894	0.193928	0.0503781	0.0563043	0.230641	0.122143
Pam	FB-M8	#78B33E	0.143182	0.0895563	-0.0290358	0.0903777	0.158112	-0.0031564	0.0829709	0.276372	0.202049
Pard3b	FB-M8	#78B33E	0.144032	0.0886063	-0.061026	0.0523738	0.115197	0.00506586	0.106729	0.320651	0.196319
Pi15	FB-M8	#78B33E	0.0393751	0.0352858	-0.0402281	0.0169834	0.0640297	0.0093472	0.0617706	0.13771	0.0718365
Plpp1	FB-M8	#78B33E	0.0367113	0.0412808	-0.0298703	0.0311035	0.136461	-0.0054239	0.0590382	0.180369	0.0941195
Ppfia2	FB-M8	#78B33E	0.112206	-0.0319513	0.0112854	-0.00687696	0.104356	-0.0779984	-0.000214082	0.188817	0.08822
Prdm5	FB-M8	#78B33E	0.0367731	0.0764388	-0.0337251	0.0563492	0.0820794	0.0385973	0.0900339	0.197037	0.152186
Psd3	FB-M8	#78B33E	0.179858	0.111057	-0.0194045	0.0452664	0.105513	-0.0506901	0.0836612	0.310752	0.20896
Ptprd	FB-M8	#78B33E	0.00849061	0.0786013	-0.0444634	0.0129595	0.0817647	0.137269	0.0594934	0.185764	0.0902068
Raph1	FB-M8	#78B33E	0.060267	0.0335713	-0.0806786	0.0973769	0.136563	0.0213698	0.11552	0.269494	0.137548
Robo1	FB-M8	#78B33E	0.233994	-0.0595166	0.00936563	0.00892406	0.128399	-0.0837807	-0.0162346	0.248379	0.152029
Rsrc1	FB-M8	#78B33E	0.0639574	0.0768329	-0.0212558	0.0512265	0.0595187	0.0516105	0.0673554	0.204648	0.14957
Scmh1	FB-M8	#78B33E	0.0475108	0.0184201	-0.0425926	0.066031	0.067597	0.0284128	0.0628886	0.170452	0.107837
Spata6	FB-M8	#78B33E	0.119914	0.0397515	0.0114336	0.0320137	0.0636724	0.0126875	0.053778	0.178231	0.146573
Ssbp2	FB-M8	#78B33E	0.0209328	0.0871827	-0.0460092	0.0623583	0.105906	0.0966578	0.101694	0.244468	0.155921
Stag1	FB-M8	#78B33E	0.0599566	0.0887563	-0.0703263	0.0877536	0.0704972	0.0727806	0.120761	0.248807	0.19498
Tbc1d5	FB-M8	#78B33E	0.066386	0.0866652	-0.0238643	0.0677373	0.066741	0.019265	0.0712929	0.207465	0.156789
Tcf12	FB-M8	#78B33E	0.106145	0.0772383	-0.0544048	0.0802925	0.0957879	0.0313638	0.116957	0.298805	0.215495
Tenm3	FB-M8	#78B33E	0.196251	0.0891018	-0.0213099	-0.0218703	0.0824695	-0.0998527	0.0407613	0.275213	0.165506
Trps1	FB-M8	#78B33E	0.146347	0.0853264	-0.107097	0.0858997	0.113408	-0.00392022	0.153101	0.34777	0.21922
Tsc22d2	FB-M8	#78B33E	0.0665914	0.0958189	-0.0393201	0.0624299	0.0586983	0.0321812	0.105641	0.199627	0.166956
Usp47	FB-M8	#78B33E	0.0653601	0.033735	-0.0487909	0.0874539	0.0836275	0.0316934	0.0964192	0.195079	0.143107
Vps13b	FB-M8	#78B33E	0.0512299	0.0899493	-0.0359528	0.0907919	0.0903434	0.100072	0.110303	0.231715	0.167985
Xrcc4	FB-M8	#78B33E	0.0324788	0.0332284	-0.0220241	0.0413774	0.0650154	0.0216553	0.0639892	0.150039	0.0878357
Zbtb20	FB-M8	#78B33E	0.111412	0.128378	-0.137118	0.107565	0.142516	0.107562	0.166535	0.421613	0.222213
Zcchc7	FB-M8	#78B33E	0.0941964	0.0676809	-0.0489175	0.0733034	0.0709515	0.0354713	0.0885268	0.250878	0.191327
Zfpm2	FB-M8	#78B33E	0.118503	0.157788	-0.120465	0.085661	0.0702769	0.0735731	0.171682	0.379021	0.23314
Jak1	grey	grey	0.0576342	0.104216	0.0397256	0.00307871	-0.00350402	0.00474966	0.0437091	0.0658102	0.120812
Jak2	grey	grey	0.0457893	0.027192	0.0346255	0.0191079	0.0235945	0.0227616	0.00475494	0.0518144	0.087341
Setd7	grey	grey	0.0775544	0.0107351	0.0205987	-0.00231917	0.0172215	0.0405985	-0.00161901	0.0472249	0.0753479
Stat1	grey	grey	0.0198989	0.0367909	0.0507995	-0.0461753	-0.0152691	-0.0220492	-0.0541714	0.00367815	0.0306902
Stat3	grey	grey	0.00393345	0.0209578	-0.0203608	0.0263481	0.00763822	0.0526806	0.0640752	0.0388117	0.0576387
Stat5b	grey	grey	0.0427573	0.0295629	0.0138461	0.0331745	0.0345341	0.050456	0.0340042	0.0561596	0.0934788
Stat6	grey	grey	0.0285575	0.0186628	0.0433831	0.00796623	0.00983466	0.00753755	-0.00352525	0.00996124	0.0477334
Tgfb3	grey	grey	0.0423848	-0.0176517	0.0507733	0.0101502	0.0685813	0.0149041	-0.03046	0.0250795	0.0420059
Col1a1	grey	grey	0.067159	-0.0112605	-0.00478442	0.00643843	0.0620563	0.012284	0.0450704	0.0772435	0.0749178
Col1a2	grey	grey	0.0687043	0.0201675	0.0192857	0.0289065	0.0844028	0.0695337	0.0364514	0.10648	0.120186
Col27a1	grey	grey	-0.0176049	0.0134732	0.0367507	0.0177072	0.0586376	-0.0265139	-0.0166394	0.0501633	0.0520589
Col3a1	grey	grey	0.067062	0.0334864	-0.0671284	0.0187403	0.0955529	0.0462405	0.0728731	0.16088	0.109791
Col4a3	grey	grey	0.0811021	0.0212934	0.0053941	0.0453908	0.135946	0.0396242	0.0678086	0.154218	0.123876
Col4a3bp	grey	grey	0.0395734	0.0275691	0.0256025	0.062924	0.0414059	0.0132399	0.0314266	0.0672422	0.10341
Col4a4	grey	grey	0.0698468	0.0564108	-0.00511487	0.0662329	0.134507	0.103346	0.103613	0.167418	0.154764
Col6a1	grey	grey	0.0489085	0.0435883	0.0469281	-0.0145776	0.00149647	-0.0358136	-0.00352387	0.0235332	0.0423293
Col6a2	grey	grey	0.0727112	0.0972078	0.0188626	-0.0228189	0.0173897	-0.030479	0.023856	0.0450081	0.0918077
Dbp	grey	grey	0.0150901	0.000131687	0.100002	0.028003	0.00914786	-0.0525223	-0.0994062	-0.0488248	-0.00382286
Hlf	grey	grey	-0.0111109	0.117761	0.0980546	-0.029796	-0.00384234	0.0263556	-0.0790461	-0.0107787	0.0469952
Per3	grey	grey	-0.0156666	0.00628737	-0.0356855	-0.0511184	-0.016897	-0.00199895	-0.0520012	-0.0426525	-0.0454813
Zbtb16	grey	grey	0.00711237	0.0701102	-0.0456968	0.0479883	-0.0299954	0.217241	0.0709394	0.0243333	0.0545619
Aak1	grey	grey	0.0629861	0.0170311	0.0185926	0.0640569	0.0497874	0.0135232	0.0225944	0.0799101	0.116927
Aamdc	grey	grey	0.0250351	0.00589013	0.0556436	-0.0151037	0.0218168	-0.019988	-0.0433165	-0.00298082	0.0319594
Aars	grey	grey	0.0106176	0.022625	-0.00750643	0.00961608	0.0149291	0.0047116	0.0281727	0.0297321	0.0485763
Aatf	grey	grey	0.0449358	0.0348327	0.000460685	0.0216245	0.03264	0.0225526	0.0337949	0.0633944	0.109484
Abat	grey	grey	-0.0467291	0.0372325	-0.00123391	0.0240069	0.0230502	0.0319766	0.0126922	0.0169438	0.0197168
Abca6	grey	grey	0.0769266	0.111951	0.0672698	-0.0114635	-0.011277	0.128357	0.028363	0.109905	0.147103
Abca8b	grey	grey	0.158612	0.0798834	0.0742809	0.012655	0.0656801	0.0581834	0.00661113	0.153412	0.19577
Abca9	grey	grey	0.0514579	0.107296	0.0605594	-0.00529456	0.0601749	0.107568	0.0168939	0.111466	0.146848
Abcb10	grey	grey	0.00407964	0.0198119	0.0137641	0.0173314	-0.000768483	0.0121487	0.00465404	0.00400053	0.0280845
Abcb1b	grey	grey	0.0285481	-0.0261109	0.00445568	0.0018622	0.0138095	0.0338162	0.00403038	0.0214588	0.0431209
Abcb7	grey	grey	0.0380199	0.0365258	0.0396683	0.0398525	0.0340837	0.0116849	0.00979221	0.0628307	0.0934017
Abcc1	grey	grey	0.0486104	-0.0197202	0.0438557	0.0473278	0.0591796	-0.0293056	-0.0257005	0.0286831	0.0628011
Abcc4	grey	grey	0.0103048	0.0174378	0.0334232	0.0207042	-0.00669147	0.0320287	-0.0136705	0.0107555	0.0534472
Abcc5	grey	grey	0.0593163	0.0266375	0.0583557	0.0186804	0.0213664	0.0150928	-0.011724	0.0621726	0.0958117
Abcd3	grey	grey	-0.00106229	-0.00586326	0.0088114	0.0971422	0.0423108	0.0281417	0.0254217	0.0362574	0.0677689
Abcd4	grey	grey	0.0287163	-0.0143688	0.0420117	-0.0274987	0.00150052	-0.0106319	-0.037899	-0.0164046	0.0136648
Abce1	grey	grey	0.0370381	0.0319781	0.02203	0.0129062	0.0171896	0.00886424	-0.00516188	0.029359	0.0755643
Abcg2	grey	grey	0.0238192	0.0401163	-0.00863077	0.0133407	0.039856	0.00560529	0.0307819	0.0620204	0.0663788
Abhd12	grey	grey	0.0130777	0.00401867	0.0253729	0.00522781	0.0127669	0.0060456	-0.0186468	0.0177297	0.0265341
Abhd17b	grey	grey	0.072135	-0.0079293	0.0274436	0.00240523	0.00323142	-0.00411299	-0.0128092	0.0229527	0.0635636
Abhd2	grey	grey	0.0319493	0.0699535	0.0430176	0.00746459	0.0308222	-0.0230855	-0.0120844	0.0317593	0.0742529
Abi2	grey	grey	0.044828	0.043741	-0.0165587	0.0261762	0.0417776	0.00917728	0.0455217	0.0926149	0.106657
Abl1	grey	grey	0.0640207	0.0332996	0.0558069	0.00295913	0.014309	0.00408583	-0.0155646	0.0324807	0.0915205
Abl2	grey	grey	0.102639	4.21e-06	0.0296243	0.0277597	0.0564971	-0.0228051	-0.000303344	0.0859839	0.117228
Ablim1	grey	grey	0.22806	-0.156409	0.101549	0.144282	0.0662276	-0.0428048	-0.0715437	0.0880329	0.110777
Ablim3	grey	grey	-0.0349256	0.0612318	-0.0114703	0.0147068	0.0136011	0.0423755	0.0352377	0.0175408	0.0273594
Abr	grey	grey	0.0162041	0.0095024	0.0308468	0.00419441	0.0185913	-0.00499108	-0.00319063	0.0132373	0.0303494
Abtb2	grey	grey	0.0196434	-0.0118357	-0.0283767	0.104525	0.0435211	-0.00198887	0.0652297	0.0354372	0.0458171
Acaca	grey	grey	0.0748982	0.0232814	0.00365802	0.0394638	0.0574382	0.00527957	0.0342687	0.103088	0.144932
Acad8	grey	grey	0.0156671	0.00691017	0.00379495	-0.00028414	0.0290754	0.00063729	-0.00286284	0.0241101	0.0377806
Acadsb	grey	grey	0.0165046	0.0449186	-0.00412197	0.0361277	0.0368017	0.0727717	0.0496447	0.0852106	0.109394
Acap2	grey	grey	0.0546714	0.0867509	0.0228074	0.00892616	0.0240701	0.0375712	0.0111252	0.0925484	0.129886
Acat1	grey	grey	0.00496971	-0.019872	0.0613336	0.0311431	0.00582209	-0.00477145	-0.0359331	-0.0230356	0.0288021
Acbd3	grey	grey	0.075065	0.0177001	0.056381	-0.0169313	0.0151081	-0.0083702	-0.0217177	0.0363988	0.0972043
Acbd4	grey	grey	-0.0131858	0.0238524	0.0164421	0.0270923	0.0137443	0.053408	0.00978178	0.00712785	0.0353156
Acbd5	grey	grey	0.0623598	0.014977	0.0283159	0.00366371	0.0306399	-0.00747013	-0.000815466	0.0577273	0.0889523
Acbd6	grey	grey	0.0222182	0.0261632	0.00513756	0.0248531	0.0290648	0.0315383	0.020506	0.0358082	0.070971
Ace	grey	grey	0.0435574	0.040113	0.0560889	-0.00263496	0.0113116	0.0693022	-0.0210626	0.000809058	0.056722
Acer3	grey	grey	0.0664865	-0.0331832	-0.0027672	0.0306013	0.0211778	-0.0169937	0.017175	0.0468845	0.0548848
Ackr4	grey	grey	0.0545236	0.0238119	0.0425353	-0.00796611	0.0437787	0.0052671	-0.0422111	0.0354388	0.0618704
Acly	grey	grey	0.0425648	-0.00659221	0.0169655	0.00740634	0.0117553	-0.00157931	-0.00215678	0.0222357	0.0462986
Aco1	grey	grey	0.0244422	0.0267553	0.0360262	0.00988832	0.0120582	0.014369	-0.0155683	0.01054	0.0503701
Aco2	grey	grey	-0.0343075	-0.0402925	0.0956933	0.0913214	0.0172764	-0.00191007	-0.0162909	-0.026147	0.0169781
Acot9	grey	grey	0.0419086	0.0274469	-0.0149152	0.020738	0.0185656	0.00352427	0.0467044	0.0480561	0.0582985
Acox1	grey	grey	-0.011194	-0.0152088	0.0378897	0.0960684	0.017516	0.0244964	-0.00129201	0.00106767	0.0297319
Acsl4	grey	grey	0.0553841	0.0340835	-0.0272256	0.0262644	0.0337575	0.0229564	0.074678	0.0806976	0.0978281
Acsl5	grey	grey	0.031569	0.0233177	0.018097	0.0011729	0.0108036	-0.00718629	0.000772951	0.0263711	0.0501286
Acss2	grey	grey	0.000928733	0.025083	0.00880911	0.0395918	0.0132709	0.0186838	0.0231414	0.0235133	0.0537618
Actl6a	grey	grey	0.0286285	0.00111085	0.0225629	0.00516212	0.00970785	-0.00286969	-0.0194073	0.0111301	0.0442418
Actn4	grey	grey	0.00192639	0.0578939	0.000330269	0.0186335	0.010294	0.0688912	0.0623375	0.0360485	0.0659032
Actr10	grey	grey	0.0187697	0.0105164	0.0176722	0.00734572	-0.00730249	0.00842946	9.57e-06	0.0213905	0.0415354
Actr1a	grey	grey	0.043281	-0.00158345	0.0336761	-0.00229423	0.00169037	-0.0147116	-0.0286573	0.00689963	0.0411932
Actr2	grey	grey	0.0676814	0.0164437	0.00802843	0.0126708	0.0240414	0.00361464	0.00561028	0.0612617	0.0918985
Actr8	grey	grey	0.0210095	0.0162866	0.0390187	0.00853838	0.020916	0.0154324	-0.0116302	0.00702617	0.0444383
Acvr1b	grey	grey	-0.0158107	0.0443963	0.0222368	-0.00625587	0.008972	0.0371442	0.00218385	0.00517231	0.0329838
Acvr2a	grey	grey	-0.0270093	0.0795467	-0.031662	0.0410238	0.043125	0.0784953	0.0739231	0.0873796	0.0793974
Acvrl1	grey	grey	0.0209001	0.0817641	0.0468241	-0.027812	-0.0238745	0.0209514	-0.0186341	-0.000644047	0.0417298
Acyp2	grey	grey	0.0628726	-0.0189523	0.0050539	0.127372	0.0667043	-0.00206733	0.0334705	0.0707429	0.0886292
Adam10	grey	grey	0.0740518	0.00200121	0.0170357	0.024293	0.0473271	-0.00864262	0.00457314	0.0754514	0.100373
Adam17	grey	grey	0.0450968	0.0190022	0.0130421	0.00890952	0.0162209	0.033466	0.020047	0.0464693	0.088353
Adam19	grey	grey	0.136343	0.0460269	0.0342501	-0.0405248	-0.00991381	-0.0877281	-0.0113433	0.0815944	0.111178
Adamts14	grey	grey	0.00477192	0.0879936	0.031931	-0.0259168	-0.0429171	0.0351207	0.0167837	-0.0120184	0.0538641
Adamts3	grey	grey	-0.078144	0.0569447	-0.0397446	0.0622666	0.0660606	0.162378	0.0672452	0.0437005	0.0419737
Adamts5	grey	grey	0.0904389	0.119757	-0.0336485	-0.0132132	-0.0384365	0.191026	0.0692691	0.120631	0.134906
Adamtsl1	grey	grey	-0.0424587	-0.00549887	-0.0276168	-0.0115407	0.0682874	0.151926	0.00488531	0.0251541	0.00465551
Adamtsl5	grey	grey	0.137414	-0.0680075	0.00281241	0.0525505	0.015926	-0.0631748	-0.00542478	0.0458246	0.0469017
Adar	grey	grey	0.0196473	0.0166315	0.0359413	-0.00663955	0.0187681	0.00217446	-0.0270019	0.0112531	0.0468169
Adat1	grey	grey	0.00824959	0.0137088	0.0126543	0.00811587	-0.00841536	0.0156692	-0.00284036	-0.00289567	0.0247149
Adcy2	grey	grey	0.0670167	0.0129014	-0.0033065	0.0086468	0.0476084	-0.00373601	0.0171444	0.0716549	0.0716788
Adcy3	grey	grey	0.00789792	0.0497612	0.0264617	-0.0133064	0.0132072	0.00322495	0.000599802	0.0268817	0.0447732
Add1	grey	grey	0.0941672	0.0257196	0.038918	0.00622685	0.0401084	0.00724867	-0.00968723	0.0844711	0.110705
Adgra2	grey	grey	0.0238565	0.0461581	0.0475884	-0.0314908	0.0325238	-0.00343029	-0.0221166	0.0173754	0.0530255
Adgra3	grey	grey	0.0171081	0.0361325	-0.0027517	0.0306509	0.0511105	0.0191677	0.0333192	0.0648356	0.0750061
Adgre5	grey	grey	0.0344658	0.0823212	0.0717237	-0.0201085	-0.0122348	-0.0838624	-0.0290137	-0.00593069	0.0612102
Adipor1	grey	grey	-0.00388776	0.0215795	0.0305182	0.0077155	0.00320229	0.0274831	0.00225822	0.00682833	0.0329145
Adnp	grey	grey	0.00702698	0.0279641	-0.114417	0.00421919	-0.0146466	0.024102	0.0630696	0.0353528	0.00963838
Adss	grey	grey	0.0282843	0.0188222	0.000704044	0.0248193	0.00935445	0.0145849	0.0282203	0.039961	0.0634641
Afdn	grey	grey	0.0547364	0.00848574	0.0353137	0.0383657	0.0594333	0.0134519	4.63e-05	0.0597789	0.0977153
Aff1	grey	grey	-0.0252596	0.0913275	-0.0143331	0.0325734	0.0227606	0.109716	0.0371377	0.0410707	0.0874898
Aff4	grey	grey	0.0608793	0.0402747	-0.0307396	0.0775354	0.0518894	0.061149	0.104982	0.109278	0.140482
Afg1l	grey	grey	0.0599045	0.00829949	0.0176626	0.0408246	0.0162813	0.00526726	0.00825634	0.0479475	0.0791753
Afg3l1	grey	grey	0.018646	-0.0109943	-0.0597783	-0.0306213	-0.0168515	0.0106677	0.00564151	-0.00167417	-0.0084331
Aftph	grey	grey	0.0507778	0.019222	0.00918365	0.0295123	0.0346707	0.022124	0.0259894	0.06784	0.0980119
Agbl3	grey	grey	0.0173449	0.0157064	0.00231274	0.0131877	0.0195976	0.0177217	0.0177414	0.0445646	0.0510374
Agfg1	grey	grey	0.0674885	0.0223578	0.0020106	0.0512348	0.0387586	0.0264522	0.0357477	0.0849414	0.113214
Agfg2	grey	grey	0.0223436	-0.011837	0.00352725	0.0167101	0.0147039	-0.00328544	-0.0121839	0.0127242	0.0297985
Aggf1	grey	grey	0.0454532	0.0086109	0.0444224	0.00729841	0.0222911	0.00120512	-0.0198751	0.027932	0.0638668
Agk	grey	grey	0.0387661	0.0497176	-0.0246465	0.0321297	0.020707	0.0264106	0.0400631	0.0788102	0.0932032
Ago1	grey	grey	0.0176112	0.00746733	0.0111904	0.00538619	0.0257343	0.0125731	-0.0071601	0.014933	0.0335365
Ago3	grey	grey	0.049295	0.0591488	-0.0132197	0.0431465	0.0513457	0.0206759	0.0477315	0.0951537	0.13674
Ago4	grey	grey	0.00315199	0.0332854	0.0255771	-0.010436	0.0192762	0.0406879	0.00082301	0.0290841	0.0361818
Agpat3	grey	grey	0.0153903	0.00548495	0.0423601	-0.00106071	0.00800857	-0.0013395	-0.0240724	-0.0115107	0.0324873
Agpat5	grey	grey	0.0352053	0.00455182	0.0547611	-0.0108788	0.0221079	-0.022559	-0.0339571	0.0178981	0.046805
Agps	grey	grey	0.0428517	0.0361778	-0.0215934	0.0511585	0.0391493	0.0207569	0.0655021	0.101875	0.119405
Agrp	grey	grey	0.0189453	0.0299754	-0.0320253	0.00768299	0.0115355	0.00498662	0.037033	0.0248744	0.0331748
Agtpbp1	grey	grey	0.0116168	-0.00421252	0.00476214	0.0788564	0.0102464	-0.00497688	0.0342212	0.0238574	0.0636514
Ahctf1	grey	grey	0.0643166	0.0349218	0.0210519	0.0270735	0.0297156	0.0142344	0.0208338	0.0517253	0.101503
Ahcyl1	grey	grey	0.0521862	0.0284849	-0.0152679	0.048906	0.0175154	0.0357806	0.0691352	0.0787794	0.105198
Ahi1	grey	grey	0.0641227	0.00178172	0.0215325	-0.0109439	0.025289	-0.0191729	0.00617861	0.0455876	0.0697913
Ahsa2	grey	grey	-0.00359948	0.0363895	0.0103226	0.0289347	0.00156282	0.0208089	0.0277058	0.0172452	0.0511484
Aida	grey	grey	0.0725487	-0.0124522	0.0343463	-0.0105343	0.00885895	-0.0100788	-0.016204	0.0359411	0.0549113
Aifm1	grey	grey	0.00286134	0.0145783	0.0216008	0.0102882	0.00989114	0.0125271	-0.000299847	0.0123791	0.0315774
Ak3	grey	grey	0.0286826	0.00916175	0.00720699	0.0477072	0.0343716	0.0496479	0.0284366	0.0549966	0.0758032
Akap10	grey	grey	0.0203415	0.063379	0.0133267	0.0191753	0.0177901	0.0244063	0.0342279	0.0477699	0.0936992
Akap11	grey	grey	0.0403024	0.0373478	0.0333583	0.0229223	0.0508453	0.0210352	0.0114005	0.0676364	0.0989469
Akap7	grey	grey	0.0269461	0.0467358	-0.00439016	0.0299309	0.0266499	0.0456069	0.039189	0.071099	0.0804466
Akap8	grey	grey	-0.0120315	-0.00799385	0.027054	0.0254286	-0.00409081	3.82e-05	-0.020797	-0.0278083	0.00550672
Akap8l	grey	grey	-0.0147314	0.0122281	0.0136067	0.0667791	0.0147187	0.030905	0.0318404	0.0149014	0.0317651
Akap9	grey	grey	0.0578333	0.0487078	0.0703204	0.024408	0.0446038	-0.00103231	-0.0137075	0.0524813	0.122731
Akirin1	grey	grey	0.0338489	0.0142294	0.0090679	-0.00492733	-0.00978626	0.00281115	0.00846494	0.0147761	0.0337605
Akirin2	grey	grey	0.0251139	0.00130343	0.0243024	0.0102017	0.00730351	-0.00469749	-0.00814637	0.0234604	0.0476673
Aktip	grey	grey	0.0357058	0.0140112	0.0381396	0.00525679	0.024782	-0.0104077	-0.00112141	0.0431907	0.0620865
Aldh18a1	grey	grey	0.0339487	0.020897	0.0333092	-0.0218811	0.0032244	-0.0127356	-0.0166877	0.0111573	0.0549166
Aldh1a2	grey	grey	0.0662235	0.0262449	0.022249	-0.059707	-0.0156905	-0.00584438	-0.057389	0.023815	0.0609066
Aldh3a2	grey	grey	0.0579527	-0.0145454	0.0323058	-0.00111667	-0.00433693	-0.0103588	-0.0346007	0.0139445	0.0416668
Aldh7a1	grey	grey	0.000940521	0.0335424	0.00380103	0.00441931	0.0286445	0.0368862	0.0209733	0.0238963	0.0419531
Alg13	grey	grey	0.01963	0.0280143	-0.00733599	0.0304322	0.0145865	0.0224581	0.0399504	0.0472823	0.0746516
Alg14	grey	grey	0.0473102	0.0145971	0.0297072	-0.001827	0.0273994	0.00157686	-0.00756417	0.0406453	0.0637028
Alg6	grey	grey	0.00357234	0.0444399	-0.00312515	0.0313993	0.037778	0.0204301	0.0333276	0.047653	0.0637314
Alg9	grey	grey	0.0339466	0.0039229	0.0218738	0.00759074	0.0340097	-4.97e-05	-0.000746885	0.0417174	0.0542125
Alkbh1	grey	grey	0.0326779	0.0161529	0.0346043	0.00348072	0.00261033	-0.00370164	-0.0257018	0.00748115	0.0594585
Alkbh3	grey	grey	0.00521505	0.0233254	-0.0114194	0.02558	-6.82e-05	0.0189952	0.023475	0.025384	0.0341469
Alkbh5	grey	grey	0.0322021	0.0103497	0.0320859	-0.0214482	-0.021746	-0.00720906	-0.0298369	-2.47e-05	0.0322748
Alkbh8	grey	grey	0.0202178	0.0180964	0.00818083	0.0335572	0.0295097	0.0121471	0.0130586	0.0364867	0.0640985
Alms1	grey	grey	0.0426598	0.0176396	0.00479205	-0.000403009	0.00932252	0.0176815	0.00558072	0.0589049	0.0621186
Alpk1	grey	grey	-0.000330216	0.0751818	-0.0187017	0.0344589	0.0253514	0.0362003	0.0941836	0.0731857	0.0865578
Als2	grey	grey	0.0310878	0.00216427	0.0305636	-0.0020088	0.0238708	-0.0103685	-0.026247	0.0359378	0.0506162
Ambra1	grey	grey	0.0546663	0.0592824	-0.0464703	0.0757382	0.0698363	0.0396651	0.0783114	0.134303	0.16051
Amfr	grey	grey	0.0640835	0.00388908	0.0284711	0.0186923	0.0312369	0.000423805	-0.00614204	0.0446233	0.070001
Ammecr1	grey	grey	0.0464245	0.0357221	-0.0214951	0.0519795	0.0283607	0.00750491	0.0499793	0.0790737	0.0914589
Ammecr1l	grey	grey	0.0415488	0.0175135	0.0393141	0.000684689	0.0136537	0.0071566	-0.0120516	0.0155528	0.0659566
Amn1	grey	grey	0.00245934	0.030042	-0.0473061	0.0490406	0.0422868	0.0521735	0.0613871	0.0609533	0.0762683
Ampd2	grey	grey	0.0326304	0.00679157	0.0544247	-0.0262003	0.00428375	-0.0149276	-0.0420515	-0.0129435	0.0229813
Amy1	grey	grey	-0.00699032	0.00412779	-0.0196823	0.0531745	0.0424003	0.0143219	0.0437532	0.0562201	0.0513755
Amz2	grey	grey	0.0204451	0.0165009	0.0181414	0.0043715	0.0181514	0.016661	-0.0058707	0.0269838	0.0618578
Anapc1	grey	grey	0.0259846	0.0399946	-0.00646793	0.0272595	0.0231682	0.00571206	0.0367475	0.0592496	0.078931
Anapc10	grey	grey	0.0445667	0.0133518	0.0196132	0.0165093	0.0295395	0.00890912	0.00104829	0.0530226	0.0681373
Anapc2	grey	grey	0.0410028	-0.00641121	0.0485494	-0.0333481	-0.0132348	-0.00948555	-0.0399129	-0.0186976	0.0132806
Anapc4	grey	grey	0.0400803	0.0381474	0.0266681	0.0133285	0.0263127	0.00584546	0.00275597	0.0419927	0.0752924
Anapc7	grey	grey	0.00182113	0.0238589	0.0157283	0.019794	0.0234233	0.0282853	0.0207098	0.0267337	0.0334396
Angel2	grey	grey	0.0146046	0.0148742	0.0216841	0.00122597	0.0145784	0.0123279	-0.000151453	0.027256	0.0530954
Ankfy1	grey	grey	0.0520064	0.0491079	0.00944988	0.0096809	0.0314333	0.00903062	0.0179603	0.0657538	0.100723
Ankhd1	grey	grey	0.0626102	0.0532724	-0.0246372	0.0583803	0.0475068	0.020436	0.0630652	0.115407	0.148506
Ankib1	grey	grey	0.0758723	0.0365351	0.00653111	0.0269495	0.030871	0.0321535	0.0256255	0.0919365	0.125902
Ankle2	grey	grey	0.0231581	0.0277646	0.022024	0.00544707	0.00703653	0.0147556	0.0119171	0.0368154	0.0641312
Ankmy2	grey	grey	0.0239928	0.0244662	-0.00638618	0.00318026	0.0221709	0.013389	0.0309813	0.0660668	0.0579725
Ankrd10	grey	grey	-0.0129598	0.0307455	-0.00479655	0.0556789	0.00556372	0.050634	0.0515584	0.0260751	0.047357
Ankrd11	grey	grey	0.0621896	0.06826	0.0462828	0.0377226	0.0467405	0.0386348	0.0253816	0.0774538	0.154808
Ankrd12	grey	grey	0.114103	0.0215231	0.0947095	0.0114029	0.0606241	-0.029647	-0.068233	0.0643467	0.124684
Ankrd13c	grey	grey	0.0449883	0.0276763	0.00319605	0.020509	0.0406995	0.0149358	0.035101	0.0633262	0.0990705
Ankrd16	grey	grey	0.016268	0.0050907	0.0251821	0.00552998	0.00984802	0.0176062	0.00876051	0.0123433	0.0288391
Ankrd17	grey	grey	0.0518622	0.0637814	-0.0369949	0.0910136	0.045053	0.0350337	0.0943723	0.134816	0.167314
Ankrd26	grey	grey	0.040658	0.00910953	0.0481883	-0.00837638	0.0173048	0.0129013	-0.0256314	0.019594	0.0455454
Ankrd27	grey	grey	0.0737559	0.0142444	0.0429724	-0.00189466	0.0224375	0.00377469	-0.0213926	0.0468096	0.083242
Ankrd40	grey	grey	0.0024796	-0.00419875	0.044222	0.00619718	-0.000809525	-0.00025684	-0.00937251	-0.00262252	0.0228275
Ankrd46	grey	grey	0.0276763	0.00871702	0.00280112	0.0194011	0.0133694	0.00550999	0.000458952	0.0327714	0.0356988
Ankrd52	grey	grey	0.0325151	0.0063183	0.0109568	0.00615964	0.0197873	0.015858	-0.00995136	0.0147097	0.0496816
Anks3	grey	grey	0.0352203	-0.000681374	0.0235585	-0.00354384	0.0137585	0.0158771	-0.00322688	0.0238001	0.044032
Anks6	grey	grey	0.0475797	0.0167454	0.0538581	-0.0319078	0.0139341	-0.0383404	-0.0313481	0.00779222	0.0530154
Ano10	grey	grey	0.0179567	0.00612276	0.0315935	0.00739193	0.015604	0.0109981	-0.0094118	0.0140333	0.0436196
Anp32b	grey	grey	0.0365521	-0.0062664	0.027863	0.0110544	0.00164635	-0.0128184	-0.017727	0.015635	0.0452718
Anpep	grey	grey	0.0712279	-0.0232998	0.0375851	-0.0193843	0.0177023	-0.00588419	-0.0493876	0.0358577	0.048221
Antxr2	grey	grey	0.130609	0.0251218	-0.0265833	0.0403979	-0.00926403	0.0753334	0.0649826	0.105572	0.128764
Anxa11	grey	grey	0.00804357	0.0058272	0.0163297	0.0292014	0.00957627	0.0180894	0.0134137	0.00788979	0.0322269
Anxa5	grey	grey	-0.00622938	0.00817596	-0.026761	0.0256782	0.0412745	0.0390773	0.0657278	0.0428207	0.0350554
Anxa6	grey	grey	0.00558184	0.0326911	0.0220189	0.0181357	0.0308044	0.0487145	0.00844059	0.0215454	0.0596514
Anxa7	grey	grey	0.0690866	-0.00478027	0.00123562	0.0228273	0.0209732	-0.0066744	0.0364706	0.0558881	0.0812825
Aox1	grey	grey	0.0188411	-0.00955147	0.0307612	0.0483812	0.0276992	0.100848	0.00384881	0.0489225	0.064824
Ap1ar	grey	grey	0.0277116	0.0294757	0.017133	0.00677178	0.00427125	0.0081793	0.00979377	0.0342055	0.052954
Ap1g1	grey	grey	0.0455934	0.0522939	-0.00944107	0.0459008	0.0290061	0.0227822	0.0630835	0.0772804	0.114755
Ap1m1	grey	grey	0.0271744	-0.00847644	0.0442221	-0.00817942	-0.00784514	-0.00787424	-0.0317142	-0.00768612	0.0280722
Ap1s2	grey	grey	0.088005	0.012933	-0.00564231	0.0221322	0.0255958	-0.0051341	0.0417323	0.101245	0.106647
Ap2a1	grey	grey	0.0567796	-0.00722298	0.0551845	-0.0162681	0.0171553	-0.0249978	-0.0341227	0.00673421	0.0438861
Ap2b1	grey	grey	0.0712353	0.0269496	-0.0113777	0.0271906	0.0379794	0.0155979	0.0448964	0.0866482	0.12123
Ap3b1	grey	grey	0.0760424	0.0413595	0.00559326	0.0345523	0.0640711	0.0208628	0.0281552	0.110226	0.129515
Ap3d1	grey	grey	0.0296451	0.00756854	0.0488653	0.0120613	0.00904444	0.017346	-0.00939848	0.00711731	0.0493794
Ap3m1	grey	grey	0.0368384	0.00711047	-0.00211813	0.0264699	0.0300676	-0.000700942	0.0257689	0.0430313	0.0651287
Ap3s1	grey	grey	0.0483985	0.0174205	-0.0435893	0.0510807	0.0471439	0.0392224	0.0730925	0.0968031	0.0965315
Ap3s2	grey	grey	0.00992376	0.0150486	0.0117818	-0.000303787	0.00379097	0.0034258	-0.00794962	0.0276165	0.0365716
Ap4e1	grey	grey	0.0464655	0.0350348	0.00900939	0.0211323	0.0130974	0.0257314	0.0243893	0.0539388	0.0863643
Ap4s1	grey	grey	-0.00156644	-0.00355236	0.0102755	0.0210142	9.16e-06	0.0118638	0.00261512	0.00168865	0.018974
Ap5m1	grey	grey	0.034673	0.0405951	0.00903583	0.0158228	0.0238664	0.0119201	0.0215448	0.050095	0.0804147
Apaf1	grey	grey	0.0828071	0.0269971	0.0309451	0.0169099	0.0268291	0.0107315	0.0134982	0.0724537	0.12028
Apbb1ip	grey	grey	0.132508	0.0508045	0.026796	-0.00936826	0.0617936	0.0061301	0.00968346	0.118999	0.154528
Apbb2	grey	grey	-0.00761404	0.0507774	0.0043515	0.0670743	0.0528582	0.0224763	0.0168692	0.0480199	0.0791959
Apc	grey	grey	0.0437891	0.0424839	-0.00886095	0.0601823	0.0527965	0.0308457	0.0592763	0.096944	0.116077
Apcdd1	grey	grey	0.0307716	0.0168496	0.0313004	-0.00501361	0.00786034	0.0446532	-0.0182777	0.00553924	0.0424337
Apex2	grey	grey	-0.0199496	0.0220509	-0.00609771	0.104522	0.0329691	0.0174553	0.0601378	0.0583605	0.0717316
Api5	grey	grey	0.0329518	0.0240284	0.0050306	0.0121426	0.0187712	0.00332505	0.0187465	0.0355012	0.0607828
Aplp2	grey	grey	0.00453315	-0.021125	0.0540684	0.0260688	0.0151288	-0.0163868	-0.0428318	-0.0125843	0.0190544
Apobec1	grey	grey	-0.0201364	0.0446045	0.00544802	0.0221015	0.0265516	0.0226856	0.0371262	0.0252379	0.0518153
Apobec3	grey	grey	-0.00327582	0.0314065	0.00587195	0.016024	0.0225554	0.0289764	0.0133064	0.0191326	0.0447177
Apool	grey	grey	0.0215437	0.0223564	0.00389335	0.0281864	0.014018	0.0206935	0.0167847	0.036263	0.0508415
App	grey	grey	0.0544471	0.0899083	0.00666283	0.0422741	0.0605192	0.100563	0.0614405	0.115884	0.165715
Appbp2	grey	grey	0.0424939	0.0343228	0.00957536	0.0339408	0.0294496	0.0471386	0.0397195	0.0540262	0.109061
Appl1	grey	grey	0.0724164	0.0310127	0.0252574	0.0057546	0.0396802	0.0115316	0.00595236	0.0558514	0.104815
Aqr	grey	grey	0.0415067	0.017478	0.0163543	0.0117567	0.0267958	0.0134094	0.0173701	0.0433074	0.072681
Araf	grey	grey	-0.00334085	0.00757535	-0.00902499	0.0413865	0.0386922	0.0206028	0.0328806	0.0399207	0.0390008
Arcn1	grey	grey	0.031367	0.0564188	-0.0251312	0.0291093	0.0189557	0.0419502	0.0727635	0.0706748	0.109322
Arel1	grey	grey	0.046145	0.00514578	0.0421418	0.00615142	0.00210353	-0.0124848	-0.0252481	0.01644	0.0478456
Arf1	grey	grey	0.020295	0.0145985	0.0126166	0.0136821	-0.0053884	0.00605995	0.0237912	0.0234718	0.0505339
Arf3	grey	grey	0.072038	-0.0168431	0.0352145	-0.00160522	0.0201744	-0.0173064	-0.0191747	0.0336376	0.056696
Arf5	grey	grey	0.0179955	-0.0146265	0.0104375	0.011701	0.0139075	-0.00603034	0.00111426	0.00772522	0.00454443
Arfgap1	grey	grey	0.0213937	0.0345443	0.0377642	-0.0184661	0.0120741	0.0189165	-0.0113801	0.011403	0.0591769
Arfgef1	grey	grey	0.035309	0.0499264	-0.0231153	0.0769292	0.0512751	0.0485654	0.0773074	0.112716	0.141065
Arfgef2	grey	grey	0.00797053	0.0109856	-0.0024955	0.0413092	-0.00900944	0.0289238	0.0200566	0.00581078	0.0450792
Arfip2	grey	grey	0.00721749	0.00454211	0.0357799	0.00147502	0.00646932	0.00182336	-0.022871	-0.0179878	0.00944529
Arglu1	grey	grey	0.0206559	0.0557327	-0.0032522	0.0694776	0.00725232	0.0339951	0.0609487	0.0496534	0.0846148
Arhgap1	grey	grey	0.0329682	0.0144363	0.0223515	-0.00595483	-0.000128123	0.0112646	0.0110268	0.024558	0.0448323
Arhgap12	grey	grey	0.0985084	0.0224086	-0.000406175	0.0404079	0.0579898	0.0170932	0.038791	0.129039	0.140158
Arhgap31	grey	grey	0.0360732	-0.00374155	0.0218457	0.015923	0.0260193	-0.0260595	0.0122201	0.0256936	0.0496189
Arhgap35	grey	grey	0.0511773	0.0433028	-0.00597009	0.047257	0.0377099	0.0341833	0.0399376	0.0770523	0.11766
Arhgap39	grey	grey	0.0290952	-0.00494397	0.0268517	0.0239476	0.0369359	-0.0110322	-0.0172367	0.0280897	0.0498913
Arhgap42	grey	grey	0.071469	0.0897415	-0.00359628	0.0433848	0.0126887	0.00631655	0.0511003	0.125374	0.139806
Arhgap5	grey	grey	0.00634899	0.071477	-0.0047291	0.0459801	0.0383952	0.0461284	0.0511996	0.0696647	0.112161
Arhgef10l	grey	grey	0.0750312	-0.00296496	0.0594534	0.016136	0.0541643	-0.00741403	-0.0314545	0.0477058	0.0833551
Arhgef11	grey	grey	0.0388425	0.0677743	0.0292964	-0.00631278	0.016892	0.0315756	0.00768425	0.051849	0.110877
Arhgef12	grey	grey	0.0755345	0.070936	-0.00655947	0.0513613	0.0495436	0.0507592	0.0718178	0.136693	0.170669
Arhgef17	grey	grey	-0.00191622	0.0471324	0.0533611	-0.0114895	0.00553461	0.000166852	-0.0192057	-0.0058842	0.0466974
Arhgef18	grey	grey	0.0555883	0.0060411	0.0490603	-0.0168826	0.0263755	0.00199421	-0.0430668	0.0134198	0.0579079
Arhgef2	grey	grey	0.0945005	0.0141079	0.0527525	-0.0124469	-0.00424406	-0.037584	-0.00386874	0.0327767	0.0816939
Arhgef25	grey	grey	0.0158264	0.00857938	0.0494488	-0.036209	0.00841313	-0.0129223	-0.0288907	-0.0105858	0.00744078
Arhgef7	grey	grey	-0.0230963	-0.00429347	-0.00407772	0.0645578	0.0255435	0.0296754	0.0292667	0.0115965	0.0141934
Arid1a	grey	grey	0.0588557	0.032634	0.0669699	0.0193982	0.0360143	-0.00545057	-0.00770015	0.0342912	0.104816
Arid1b	grey	grey	0.0790894	0.0531952	0.0527258	0.0331215	0.0799092	0.0537079	0.0110735	0.0861462	0.152671
Arid2	grey	grey	0.0617295	0.0323634	0.0193635	0.0426572	0.0272044	0.0132721	0.0108791	0.0711906	0.10754
Arid4a	grey	grey	0.00998022	0.0721721	0.0522403	0.00121516	0.0142326	0.0354268	0.00342932	0.0463311	0.0829201
Arid4b	grey	grey	0.0444656	0.0506195	0.0262904	0.0409586	0.0607709	0.0527385	0.0292793	0.102068	0.141209
Arid5b	grey	grey	0.0160257	0.0418802	0.012373	0.0121383	0.0953503	0.0903759	0.0193451	0.0754375	0.0799508
Arih1	grey	grey	0.0708297	0.0439215	-0.0435663	0.0704514	0.0495298	0.0267031	0.0993552	0.124702	0.159161
Arih2	grey	grey	0.0409928	0.0327853	-0.0119085	0.0249742	0.0152519	0.0184084	0.0539036	0.063534	0.0925829
Arl1	grey	grey	0.0326083	-0.00658509	0.0246201	-0.00242503	0.0115339	-0.00736439	-0.00656932	0.00809725	0.0468612
Arl13b	grey	grey	0.0410179	0.0162423	0.0199485	0.0056061	0.0285392	0.000950333	0.0274975	0.0580147	0.0777106
Arl14ep	grey	grey	0.0352642	-0.014385	0.0306862	0.00064707	0.00823534	-0.00419652	-0.0374811	0.00292284	0.0331627
Arl3	grey	grey	0.0237501	-0.00676779	0.0339693	-0.000643382	0.0158245	0.0132895	-0.0231763	0.0140087	0.034739
Arl5a	grey	grey	0.053928	0.0410962	0.0551773	-0.00345315	0.036727	-0.0127344	-0.00549746	0.0653438	0.0875546
Arl8a	grey	grey	0.0388549	0.012985	0.0671263	0.000652966	0.0123519	-0.00483229	-0.0247584	0.0178092	0.0561462
Arl8b	grey	grey	0.0369878	0.02356	0.0221325	0.000855093	0.00971201	0.00578509	0.0108228	0.0356407	0.0685637
Armc8	grey	grey	0.0423729	0.0318632	0.0022339	0.0302299	0.0382111	0.0145072	0.0330603	0.0720251	0.0991763
Armc9	grey	grey	0.0297063	0.0189719	0.00234128	-0.00283746	0.0121025	0.0238646	-0.00263016	0.0309707	0.0426823
Armcx3	grey	grey	0.0104568	0.0249823	-0.0237417	0.0312595	0.00364703	0.0196557	0.0627312	0.0397746	0.0424758
Armt1	grey	grey	0.0535133	0.00600536	0.0291931	0.0132863	0.02015	-0.00779974	-0.0129827	0.0293995	0.0699233
Arnt	grey	grey	0.0606257	0.0346195	-0.00761569	0.0122079	0.0326983	0.0401384	0.0322304	0.0835812	0.116496
Arntl	grey	grey	0.0319776	-0.0195872	-0.0499605	0.046726	0.0436021	0.026277	0.0725565	0.0655478	0.0690735
Arntl2	grey	grey	0.0471222	0.0156722	0.0418625	-0.0101066	0.00586733	0.000333268	-0.0231873	0.0101517	0.0423921
Arpc1a	grey	grey	0.0512454	-0.0287263	0.0379078	-0.0197419	0.00042771	0.0105006	-0.0319124	-0.00527519	0.028746
Arpc1b	grey	grey	0.0911351	-0.0281258	0.0489096	-0.027075	-0.0120251	-0.0381987	-0.0342472	-0.00205144	0.0451074
Arpc2	grey	grey	0.0766142	0.0005247	0.0230585	-0.00239259	0.00467273	0.00793642	0.0306454	0.0494437	0.0875529
Arpc3	grey	grey	-0.00449154	0.0343396	-0.00514263	-0.00681027	0.00415997	0.0219759	0.0440656	0.0017842	0.0226542
Arpc5	grey	grey	0.046149	0.000990913	0.0297578	-0.000410769	0.00328757	-0.0115228	-0.00335678	0.0146133	0.0471564
Arsb	grey	grey	1.24e-05	0.049449	0.00112631	0.0209495	0.0527461	0.029265	0.0409262	0.0554894	0.0667717
Arsj	grey	grey	0.0673835	0.0574826	-0.0148544	-0.0030062	0.0247249	-0.00491122	0.0324787	0.0838457	0.0898004
Arsk	grey	grey	0.01211	0.017527	0.0145176	0.0198388	0.0200417	0.0229834	-0.00767029	0.0349917	0.0441871
Asah1	grey	grey	0.0311126	0.00426512	0.0162763	0.0393127	0.0186002	0.000520145	0.00550277	0.0439454	0.0574865
Asap1	grey	grey	0.132786	0.110617	0.0399612	-0.000921265	-0.0010671	-0.00765011	-0.0115567	0.103552	0.165697
Asap3	grey	grey	0.0204866	0.0202352	0.0532165	-0.0367127	0.0100236	0.0286454	-0.0505065	-0.000879786	0.0243023
Asb13	grey	grey	0.0244278	0.0021896	0.0474487	-0.0190689	-0.00558942	-0.0235248	-0.0489956	-0.00417776	0.0230635
Asb3	grey	grey	0.0428011	0.0533725	-0.000739562	0.0239178	0.0648265	0.028306	0.0374073	0.103552	0.1166
Ascc2	grey	grey	0.0632849	0.00714709	0.0465226	-0.014909	0.00937161	-0.0233217	-0.0213559	0.0230442	0.0573563
Ascc3	grey	grey	0.0940222	0.0200017	-0.016816	0.0455216	0.0604172	-0.00999888	0.0403647	0.12872	0.160894
Ash1l	grey	grey	0.0824306	0.0292008	0.01716	0.0615314	0.0571092	0.0381721	0.0248427	0.100979	0.165044
Ash2l	grey	grey	0.024096	0.000109464	0.0263556	0.00854015	-0.00875528	0.00534642	-0.0129954	0.0165038	0.0419896
Asph	grey	grey	-0.0570211	0.0733097	-0.0332124	0.0947085	0.0385188	0.0585695	0.0831457	0.0594719	0.0650377
Astn2	grey	grey	-0.0290971	0.0132645	-0.0439328	0.0278175	0.0516717	0.00171042	0.0544247	0.086172	0.0348116
Asxl1	grey	grey	0.0399282	0.0510102	0.0263919	0.034453	0.0396142	0.0314817	0.0219392	0.0623584	0.108595
Asxl2	grey	grey	0.0354145	0.0380585	-0.0112787	0.0413927	0.0488732	0.0141181	0.0497952	0.0879704	0.113511
Atad1	grey	grey	-0.00758768	0.0229248	-0.0154725	0.0436591	0.0107533	0.0289968	0.043055	0.0343307	0.0543711
Atad2	grey	grey	0.02469	0.0154249	0.0201943	0.0256777	0.0359421	0.0127758	0.00146015	0.0299706	0.0631608
Atad2b	grey	grey	0.0650518	0.0321243	-0.00823255	0.0504353	0.063447	0.0394444	0.0590311	0.113031	0.142188
Atf1	grey	grey	0.0243064	-0.00863547	-0.00487162	0.0416345	0.0134627	0.0205289	0.0276113	0.0344601	0.0531835
Atf4	grey	grey	-0.0159594	0.0051525	-0.0322881	0.0302636	-0.0123803	0.0234911	0.0699047	0.00206015	0.0145802
Atf6	grey	grey	-0.0157092	0.0189501	-0.0286196	0.0525314	0.0205345	0.0269188	0.0486398	0.0285809	0.0388673
Atf7ip	grey	grey	0.00627868	0.0831211	0.0195533	0.0295678	0.0302887	0.0460561	0.0229673	0.0739804	0.107851
Atg10	grey	grey	-0.0143256	0.06336	-0.0361599	0.0681436	0.05326	0.0842704	0.08051	0.0868533	0.0800535
Atg13	grey	grey	0.00101256	-0.00208817	0.00982299	0.0127722	0.0180981	-0.00510807	-0.0051851	0.0108012	0.0216984
Atg16l1	grey	grey	0.0288568	0.0161978	0.0122499	0.0177976	0.00314556	-0.00370341	0.0184344	0.0330389	0.0598971
Atg16l2	grey	grey	0.0140886	0.0144413	-0.0145088	0.0339348	0.0335496	0.019258	0.0352373	0.0395815	0.0555067
Atg2b	grey	grey	0.0462288	0.0172152	0.0539719	0.0169655	0.0171801	-0.00404851	-0.0144387	0.0183624	0.0622062
Atg3	grey	grey	0.0259183	0.0328508	0.00905509	0.00613832	0.00942678	0.0300374	0.018133	0.0401191	0.0810952
Atg4b	grey	grey	0.0225542	0.0112046	0.0173177	0.0110248	0.016329	0.0120644	0.0112091	0.0203235	0.0495221
Atg4c	grey	grey	0.0339974	0.0202983	0.0135607	0.00195465	0.0197143	0.00402679	-0.00403908	0.0460824	0.0583447
Atg5	grey	grey	0.0444749	0.0189477	0.0472719	-0.0016274	0.0286005	-0.00189332	-0.0165717	0.0321818	0.0674882
Atl2	grey	grey	-0.00183118	0.0121675	-0.024837	0.0584235	0.0163866	0.0495182	0.0548404	0.0341361	0.0491615
Atm	grey	grey	0.0115057	0.030398	0.0148596	0.0132952	0.0262653	0.0136784	0.00842215	0.0362095	0.0636431
Atn1	grey	grey	0.0137729	0.00825654	-0.0255026	-0.0360352	-0.0186158	-0.00465186	-0.0179193	-0.0136337	-0.00177032
Atp11a	grey	grey	0.0504444	-0.00608862	0.0112252	0.0151227	0.0225876	0.0040144	0.0106055	0.030434	0.0549482
Atp11b	grey	grey	0.0297281	0.0307725	-0.0147057	0.0313857	0.0369547	0.0368709	0.0481587	0.0755754	0.0902183
Atp11c	grey	grey	0.0213256	0.0437017	-0.0136537	0.0604207	0.0493611	0.0263729	0.0550452	0.0984405	0.102661
Atp13a3	grey	grey	0.0423546	0.050959	-0.0429679	0.0603432	0.0149819	0.0782191	0.106013	0.0729763	0.107646
Atp1b3	grey	grey	0.0522259	-0.00384124	0.00103945	0.0262956	0.0230943	0.0161622	0.0358955	0.0423243	0.0693095
Atp2b1	grey	grey	0.0884893	0.0259769	0.0103455	0.054422	0.0558387	0.0237426	0.0562338	0.108137	0.129412
Atp2b4	grey	grey	0.063961	0.0444538	0.0294776	0.0256485	0.0382128	0.025836	0.0413706	0.0622444	0.0987403
Atp2c1	grey	grey	0.0528342	0.0230756	0.027869	0.0457871	0.0219699	-0.0012034	0.0213566	0.0448379	0.0969739
Atp5g3	grey	grey	-0.0370827	-0.047495	0.19136	-0.0325567	-0.0290339	-0.0967719	-0.0931293	-0.0753202	-0.0566438
Atp6v0a1	grey	grey	0.00296145	0.0291564	0.00718114	0.0327503	0.0139536	0.0215242	0.0336409	0.0309609	0.0527948
Atp6v0a2	grey	grey	0.0403543	-0.0081721	0.028379	0.00608569	0.0157051	-0.0133959	-0.00778521	0.0114034	0.0479468
Atp6v0d1	grey	grey	0.0242838	0.0138624	0.00894237	0.00634329	0.016856	0.0142098	0.0090973	0.035389	0.0556036
Atp6v0e	grey	grey	-0.00185791	0.0130461	-0.00361297	0.0181699	0.00410337	0.0414493	0.0310919	0.0125112	0.0325
Atp6v1a	grey	grey	0.0352629	0.0230693	0.0408437	0.0164083	0.028092	0.011872	-0.00495488	0.0268835	0.0720479
Atp6v1b2	grey	grey	0.0223913	-0.00604582	0.0149623	-0.00774039	0.0194217	0.0080137	0.0130027	0.0102597	0.0338799
Atp6v1c1	grey	grey	0.0234448	-0.00352013	0.0174593	0.023228	0.0293811	0.0240074	-0.015795	0.0135121	0.0345833
Atp6v1e1	grey	grey	0.00844939	-0.00577113	0.0412765	0.00352329	0.000976098	-0.00291757	-0.0240998	0.00348332	0.011553
Atp6v1h	grey	grey	0.0300235	0.0445611	-0.0225958	0.0537282	0.0397624	0.0410039	0.061798	0.0917429	0.116788
Atp7a	grey	grey	0.0338084	0.0320077	-0.00713766	0.0112384	0.0448313	0.0329904	0.0304876	0.0704751	0.0903069
Atp8b1	grey	grey	0.15187	0.126051	-0.0163374	-0.00809178	0.0204378	-0.100641	0.0903269	0.12454	0.146122
Atp8b2	grey	grey	0.072815	-0.0192574	0.0519574	-0.0147038	0.00782458	-0.0312523	-0.0346507	0.00959073	0.0508534
Atp9b	grey	grey	0.0715999	0.061312	0.00755475	0.0569716	0.0770201	0.0418144	0.0529174	0.129697	0.164346
Atr	grey	grey	0.00993914	0.0272405	-0.024093	0.0618631	0.0333177	0.0341291	0.0514516	0.0700075	0.0842615
Atrn	grey	grey	0.0690387	0.0176441	0.0205436	0.0292581	0.0372064	0.00193442	0.00309834	0.0596898	0.102156
Atrx	grey	grey	0.0552107	0.101599	0.029039	0.0198678	0.0467164	0.0219286	0.0354513	0.102265	0.147344
Atxn1	grey	grey	0.00882228	0.079154	-0.0208867	0.0795548	0.0701416	0.127081	0.054817	0.0890621	0.124146
Atxn10	grey	grey	0.0776075	0.0219378	0.0367827	-0.00205241	0.0475399	0.0159335	0.000991595	0.0737623	0.109019
Atxn2	grey	grey	0.0321176	0.0252193	0.00113545	0.0507707	0.0288322	0.0297937	0.026096	0.0526056	0.0929596
Atxn2l	grey	grey	0.0137995	-0.00982339	0.0190874	0.0417825	-0.00822251	-0.00159948	-0.0120014	-0.00144209	0.0198099
Atxn3	grey	grey	0.033376	0.013137	0.0292098	0.00090619	0.0154689	-0.000210407	-0.00950484	0.0441988	0.0655959
Atxn7	grey	grey	0.0432843	0.06571	0.00865447	0.0290326	0.0490223	0.0627459	0.0437984	0.0916295	0.129193
Atxn7l1	grey	grey	0.0212703	0.0615391	0.045467	0.00665229	0.0425222	0.038217	-0.00746453	0.0497185	0.0993867
Atxn7l3b	grey	grey	0.0237284	0.00619315	0.0326018	-0.0189197	-0.011509	-0.013311	-0.045955	0.00533449	0.0216172
AU040320	grey	grey	0.0401315	0.0330595	0.00263715	0.0116895	0.0303044	0.020084	0.0129362	0.056862	0.0704615
Auh	grey	grey	-0.002141	0.00102379	0.0226658	0.0188605	0.0164223	0.0476986	0.00615071	0.0117601	0.0318662
Avl9	grey	grey	0.00381778	0.0435768	-0.0199668	0.0336885	0.0229131	0.0335618	0.0521406	0.0611922	0.0683021
AW549877	grey	grey	-0.00147959	0.00575751	0.0214333	0.0336643	0.0122501	0.0151006	0.0124901	0.0168876	0.0214988
AW554918	grey	grey	0.0461158	0.0684775	-0.0169632	0.0437981	0.0650039	0.0611109	0.0623169	0.110271	0.142861
Axin1	grey	grey	0.0637146	0.0222803	0.0430725	-0.00409676	0.0144925	-0.0153348	-0.0185108	0.0317436	0.0731541
Azi2	grey	grey	0.0257542	0.0227528	0.010986	0.0204646	0.00325735	0.0138663	0.0247879	0.0351115	0.0700029
Azin1	grey	grey	0.0484709	0.0082055	-0.00934631	0.063268	0.0131489	0.0169503	0.0684051	0.0500464	0.0724407
B2m	grey	grey	0.00385395	-0.00614619	0.0247365	-0.0143817	-0.0120704	-0.0126118	-0.0210364	-0.0173894	0.0104215
B3galnt2	grey	grey	0.030496	0.00891328	0.00855374	0.0119765	0.0128433	-0.00540029	0.00539965	0.0264769	0.0572156
B3gat3	grey	grey	0.0269766	-0.00733614	-0.00454402	0.0232786	0.0103393	-0.0131215	-0.00256151	0.0163152	0.0296034
B3glct	grey	grey	0.0168012	0.0462068	-0.00855874	0.0148656	0.0133259	-0.00728121	0.0279802	0.0378779	0.0541913
B3gntl1	grey	grey	0.0594751	-0.00864225	0.0295706	0.000428261	0.0180984	-0.00464737	-0.0147516	0.0408362	0.057839
B4galt1	grey	grey	0.0311048	0.0161337	-0.00402417	-0.0475961	0.018015	0.0557031	-0.0286108	0.0308776	0.0398631
Babam2	grey	grey	0.0289802	0.0530687	-0.0226459	0.0549948	0.0285154	0.0650481	0.0701335	0.0817841	0.115154
Bace1	grey	grey	0.00227426	0.0192177	0.00347549	0.0121284	0.00277539	0.015387	0.00474734	0.0108166	0.0296139
Bace2	grey	grey	-0.00296564	0.0182475	-0.00779113	0.00676078	0.0126754	0.101688	0.0242818	0.0230706	0.0386492
Bach2	grey	grey	0.0875909	-0.00948412	0.0333569	0.0355406	0.0896159	0.0292331	0.0137999	0.0837279	0.0944515
Bag3	grey	grey	-0.0192201	-0.021293	0.00671828	0.0754943	-0.00121285	0.00693385	0.030715	-0.00343162	0.0041564
Bahcc1	grey	grey	0.0513809	-0.015269	0.0559017	-0.0196322	0.0255318	-0.0236298	-0.0446007	0.00431259	0.0365094
Baiap2	grey	grey	0.0250708	-0.0244395	0.006788	0.0106239	0.0224552	0.0256763	-0.00448673	0.0156898	0.0262739
Banp	grey	grey	0.0207415	-0.00307247	-0.0697706	-0.0201415	-0.0109232	0.0348076	-0.00321947	0.00968554	0.00951049
Baz1b	grey	grey	0.0402207	0.0270761	0.0289525	0.0521778	0.0310284	0.0125191	0.012397	0.0568696	0.100882
Baz2a	grey	grey	0.0390976	0.0247654	0.045479	0.01223	0.00236126	0.000851734	-0.0130145	0.0148563	0.0638924
Baz2b	grey	grey	0.09635	0.0428825	0.0111386	0.0587844	0.0873929	0.0465307	0.0363673	0.144603	0.173859
Bbip1	grey	grey	0.0141191	0.0420672	-0.00145894	0.0181796	0.0363005	0.00562225	0.0235938	0.0426972	0.0531628
Bbs9	grey	grey	0.0499675	0.0512513	0.0206985	0.0327487	0.0490288	0.0580251	0.0289699	0.0772271	0.105426
Bbx	grey	grey	-0.0175797	0.0808845	-0.0329651	0.0740021	0.0586482	0.0688488	0.0861459	0.105677	0.105108
BC004004	grey	grey	-0.0113151	-0.00627916	0.0235518	0.0308431	0.0036697	-0.00386324	-0.000465638	0.00418272	0.0112835
BC005537	grey	grey	-0.0286555	0.00275243	-0.0193397	0.100121	0.0120958	0.0522881	0.0800298	0.0205942	0.0415136
BC005561	grey	grey	0.0745979	-0.00346167	0.055028	0.0109215	0.0373656	-0.0228962	-0.0244819	0.0301423	0.0717027
BC052040	grey	grey	0.0479619	-0.0119786	-0.0183847	0.0411883	0.0486371	0.00426419	0.0307923	0.0684498	0.0605665
Bcap29	grey	grey	0.0081982	0.0207644	-0.0168387	0.0342592	0.0426885	0.00902112	0.0385635	0.0587039	0.0567531
Bcap31	grey	grey	0.0258726	-0.00846117	0.00541962	0.0259638	0.0193555	0.016863	0.015917	0.0366202	0.0510254
Bcas3	grey	grey	0.0560938	0.0914889	0.0343033	0.0095953	0.0457919	0.0172822	0.0235404	0.10374	0.126258
Bckdhb	grey	grey	-0.00262899	0.0334135	-0.0273896	0.061399	0.0491991	0.0520228	0.061221	0.0802184	0.0869574
Bcl2l13	grey	grey	0.0133183	0.0125592	0.00239801	0.0162909	0.000587493	0.00535444	0.0150742	0.0194696	0.035311
Bcl6	grey	grey	0.0192688	0.0278625	0.0215652	0.017285	0.0301532	0.0533763	0.0213511	0.0598924	0.0697277
Bcl7a	grey	grey	0.0346148	0.0424461	0.0511808	-0.00686879	-0.0123326	0.00050365	-0.0121599	-0.00214284	0.051549
Bclaf1	grey	grey	0.01828	0.0488544	-0.0274332	0.0642665	0.0292899	0.0410388	0.091165	0.0846065	0.115758
Bclaf3	grey	grey	0.0791651	0.00630963	0.0222748	0.00804795	0.0320975	-0.0170388	-0.00338934	0.0638678	0.0936583
Bcor	grey	grey	0.0395155	0.0440275	0.047708	-0.019193	0.0123215	-0.0284622	-0.0131609	0.0187121	0.0632118
Bcorl1	grey	grey	0.0662778	-0.00341632	0.033484	-0.00771595	0.0411785	0.00599262	-0.0118772	0.0461393	0.070222
Bdp1	grey	grey	0.0508181	0.0241014	0.00952737	0.0448305	0.0193105	0.0131179	0.0430191	0.0672865	0.101848
Becn1	grey	grey	0.0377937	0.00363234	0.0536719	-0.023373	-0.00293839	-0.0190325	-0.0425872	-0.000344506	0.0335438
Bet1	grey	grey	0.00106206	0.0315644	-0.0167148	0.0115901	0.0316804	0.0157755	0.0210258	0.0418561	0.0527853
Bfar	grey	grey	0.00747576	0.0266921	-0.0110614	0.0143717	0.00255417	0.0278693	0.0374175	0.0259241	0.0410371
Bgn	grey	grey	0.0660464	0.0492303	-0.0428693	0.0393532	0.111115	-0.0583133	0.0760149	0.105005	0.0794779
Bhlhe40	grey	grey	0.105429	-0.00833597	-0.0194883	0.0575994	0.0505608	-0.0854486	0.0706698	0.0822222	0.0832824
Bicral	grey	grey	-0.0152269	0.0429736	-0.0826836	0.00215373	0.0120235	0.0468004	0.0513233	0.0247907	0.0135898
Bin3	grey	grey	0.0659271	-0.0150555	0.05347	0.0010292	0.0121452	-0.00534266	-0.0294465	0.0195243	0.0523605
Birc2	grey	grey	-0.0566197	0.0576518	-0.0655062	0.0275625	-0.00181035	0.0604067	0.0996829	0.0240735	0.024348
Birc6	grey	grey	0.0514935	0.061169	-0.00319199	0.0540598	0.051847	0.0334079	0.0652622	0.105381	0.158187
Blmh	grey	grey	0.0236945	0.0223768	0.01171	0.0123489	0.0125104	0.00494479	0.00641539	0.0345911	0.0551602
Blzf1	grey	grey	0.0290196	0.0137407	0.0286569	-0.00222535	0.0172495	0.00297344	-0.00940239	0.0318747	0.0650228
Bmp4	grey	grey	-0.0208876	0.114853	0.057374	-0.0299448	0.000197763	-0.0103462	-0.0460125	-0.0114078	0.0232835
Bmp6	grey	grey	0.102499	0.068946	-0.00199077	-0.00336853	0.011791	0.105775	0.0341303	0.0877387	0.118085
Bmpr1a	grey	grey	0.0184367	0.0171626	-0.00630494	0.0911801	0.0486945	0.024855	0.0311344	0.0721894	0.081799
Bmpr2	grey	grey	0.114066	0.0205104	0.018804	0.0444872	0.0677133	0.0150544	0.0231983	0.127241	0.15685
Bms1	grey	grey	0.0199343	0.0147535	0.0482435	0.0188196	0.0161798	0.00956137	-0.00521763	0.0214408	0.050202
Bmt2	grey	grey	0.0144476	0.0374554	-0.0165831	0.0439939	0.0425927	0.0339595	0.0574371	0.0744757	0.0904848
Bnip2	grey	grey	0.0343604	0.00849795	0.0323039	0.0323035	0.0213489	0.0114941	0.0127002	0.034122	0.0625455
Bnip3l	grey	grey	0.0169264	0.00794174	0.0236928	-0.00558415	0.00162188	0.00097094	-0.0160154	0.0021121	0.0347978
Boc	grey	grey	0.0620502	0.0405262	0.0428596	-0.0115992	0.0557648	0.0341177	-0.00483471	0.0523841	0.0848896
Brap	grey	grey	0.0414836	0.0210336	0.0647761	-0.0134147	-0.00733677	0.00950549	-0.0371945	-0.00110652	0.0594366
Brcc3	grey	grey	0.0232734	0.0351006	-0.00374965	0.0281016	0.00971024	0.0136532	0.0361703	0.0584505	0.0683595
Brd2	grey	grey	0.0283392	-0.00210768	0.0591543	0.0164657	0.00867945	0.00165541	-0.00708905	-0.00906234	0.0446483
Brd4	grey	grey	0.0466176	0.0339487	0.00646197	0.0224889	0.0181254	0.0213345	0.0337263	0.0467935	0.0992468
Brd7	grey	grey	0.0282432	0.0160511	0.0316947	-0.000198337	0.0231599	-0.0100463	-0.0152555	0.0220699	0.0497382
Brd8	grey	grey	0.0252093	0.00410634	0.0208953	-0.00217601	0.0122864	-0.000990704	-0.015305	0.015927	0.0462897
Brd9	grey	grey	0.0399816	0.00736595	0.0421842	0.0207158	0.0339845	-0.0068829	-0.00413899	0.0202349	0.044349
Brdt	grey	grey	0.0361142	0.035608	0.0348819	-0.0207437	0.0227945	0.00470817	-0.0170553	0.0458864	0.0652611
Bri3	grey	grey	-0.0297605	-0.01467	0.0226417	0.0608755	0.0113728	0.0280219	0.019869	-0.0174706	0.00359498
Brix1	grey	grey	0.00940855	0.0240129	-0.00503698	0.00511433	-0.008511	0.0124424	0.0333101	0.0162514	0.0415198
Brk1	grey	grey	0.0581139	-0.00617964	0.074483	-0.014571	0.0168477	-0.00274248	-0.0445719	0.00171889	0.0587798
Brms1l	grey	grey	0.034928	0.00430775	0.0152013	0.0201681	0.0323237	0.0062169	0.00538885	0.0361834	0.0654237
Brox	grey	grey	0.0331623	0.00508594	0.0219723	0.016265	0.00737688	0.00714848	0.0151401	0.0380187	0.0567564
Brpf3	grey	grey	0.0226762	0.00748405	0.0707557	-0.0136814	-0.00159438	-0.00559677	-0.0504545	-0.000786621	0.0322183
Brsk1	grey	grey	0.0556272	0.0092721	0.0426187	-0.0212058	0.0218081	0.00164226	-0.018142	0.0391851	0.0613473
Brwd1	grey	grey	0.0435299	0.0559998	0.00891376	0.0350258	0.0400753	0.0143943	0.0403916	0.0745931	0.128321
Brwd3	grey	grey	0.0132644	0.0292493	-0.0111765	0.0388768	0.0205927	0.0366651	0.0400785	0.0588451	0.0719954
Bsdc1	grey	grey	0.0122156	0.0226133	0.0529856	-0.0151743	0.0127236	0.00295985	-0.0325661	0.00450668	0.0397065
Btaf1	grey	grey	0.0575492	0.0385543	-0.0214128	0.0537785	0.0309216	0.0229704	0.0645183	0.0852255	0.123331
Btbd1	grey	grey	0.0679422	-0.000767062	0.0235988	0.0145458	0.0236275	0.00224078	0.00568826	0.0358905	0.0882815
Btbd10	grey	grey	0.0742463	0.0181945	-0.0235328	0.0432248	0.0312549	0.00883132	0.0507005	0.0837337	0.100056
Btbd11	grey	grey	0.00602397	0.00228478	-0.00814812	0.0207121	0.0278992	-0.00232163	0.0179941	0.0255135	0.0293033
Btbd3	grey	grey	0.0285366	0.0383222	0.0359512	-0.00970388	0.00231959	-0.0164064	-0.0126367	0.0297072	0.0527976
Btbd7	grey	grey	0.0809843	0.0360996	-0.00808785	0.0203805	0.0369913	0.0168427	0.0466697	0.105102	0.124033
Btbd8	grey	grey	0.000338714	0.0245107	-0.0753115	-0.00458896	0.0186857	0.0228865	0.0455835	0.0453656	0.0118332
Btf3l4	grey	grey	-0.000370979	0.0387365	-0.0308498	0.0580507	0.0291086	0.0405665	0.0573623	0.0504592	0.0669736
Btg3	grey	grey	-4.26e-05	0.0108783	-0.00280032	0.0170122	0.00779874	0.0329017	0.032623	0.0196088	0.0477505
Btrc	grey	grey	0.075848	0.0546284	0.0125424	0.0093382	0.0537556	0.0252995	0.00898637	0.0929568	0.139479
Bzw1	grey	grey	0.0583918	-0.00899466	0.0102332	0.0270131	0.0139866	-0.0131973	0.02303	0.0436644	0.0639199
C1galt1	grey	grey	0.0831595	-0.0333556	0.0249197	-0.0142757	0.0150818	-0.0198627	-0.0318222	0.0350357	0.0391357
C1qtnf2	grey	grey	0.0224237	0.0452176	0.00546776	-0.00202884	0.00854124	-0.0161859	0.0174946	0.0353083	0.0460197
C1ra	grey	grey	-0.011208	0.0203113	0.00137167	-0.00557665	0.0077926	0.0246989	0.0142357	0.0268629	0.0202678
C1s1	grey	grey	-0.038637	0.03505	-0.0195353	0.0222183	0.00112841	0.0638035	0.0496086	0.0213228	0.019983
C2cd2	grey	grey	0.0637525	0.00325074	-0.0070559	0.0114701	0.0319277	0.00177905	0.0190859	0.063397	0.0624898
C2cd3	grey	grey	0.0419199	0.00337898	0.0422347	0.00382508	0.036896	-0.0143923	-0.0193446	0.0264707	0.0489241
C2cd5	grey	grey	0.0531585	0.0191924	0.018109	0.0147068	0.0520028	-0.00697207	-0.0159013	0.0657449	0.0792128
C3	grey	grey	0.0491354	-0.118912	-0.0652145	0.0159519	-0.00239785	0.103015	0.0459728	0.0496917	0.00279469
C7	grey	grey	0.127409	-0.122578	-0.00776709	0.0481286	0.0924958	0.0916585	0.0291427	0.0566712	0.0444359
CAAA01118383.1	grey	grey	0.0198618	0.0196248	0.0326241	-0.0100312	0.00565854	-0.0136088	0.000115764	0.016662	0.0381211
Caap1	grey	grey	0.0272641	0.0265769	0.0239219	0.019629	0.0338338	0.00784337	0.00271555	0.0559341	0.0774397
Cab39	grey	grey	0.0588902	0.0300041	0.0272595	0.0084731	0.0202608	0.0209337	0.0049546	0.0526941	0.0855369
Cab39l	grey	grey	0.0898036	-0.0133715	0.0192258	0.011013	0.0373325	0.0218178	-0.00693127	0.0736574	0.100027
Cabin1	grey	grey	0.0484045	-0.000297733	0.0603301	0.00590253	0.0123898	-0.0155848	-0.0477196	0.00689821	0.0591564
Cables1	grey	grey	0.0245452	0.0697824	0.0593784	0.00727681	0.0497423	0.0678352	-0.00145118	0.0470433	0.0846658
Cacna1a	grey	grey	0.0603196	0.0352997	0.037952	-0.0204017	0.0106275	-0.0378118	-0.0150706	0.0396392	0.0744387
Cacnb4	grey	grey	-0.0576232	0.0871671	0.0107113	0.0256351	0.0321575	0.00462537	0.0290131	0.0161551	0.0321685
Cacng7	grey	grey	0.0237972	0.0500656	0.0229738	-0.00292179	0.0109602	-0.000706807	-0.0152453	0.0218865	0.0540461
Cacul1	grey	grey	0.0335175	0.05659	-0.00738571	0.0326888	0.0415185	0.0218402	0.0527064	0.0777586	0.0991174
Calcrl	grey	grey	0.0964832	0.0642012	-0.0165217	0.00182638	0.00716206	-0.0244324	0.0631073	0.102799	0.125086
Cald1	grey	grey	0.0653786	0.0599937	0.000357969	0.016987	0.0694513	0.0425379	0.06703	0.0868972	0.130784
Calhm2	grey	grey	0.0727513	-0.00583237	0.0459129	0.000674049	0.0158546	-0.0201736	-0.0159175	0.0252726	0.0648664
Calm2	grey	grey	0.0304346	-0.00121629	0.0120622	0.0214516	0.00745352	-0.00427732	0.0268996	0.00833962	0.048014
Calr	grey	grey	0.0109213	-0.0102064	0.00156443	0.0280393	-0.00350769	-0.0272597	0.0139742	0.0159788	0.0129783
Camk2g	grey	grey	0.0378592	0.00828263	0.0246669	0.0206723	0.00463672	-0.0262615	0.000631144	0.0137932	0.0426062
Camk2n1	grey	grey	0.0573702	0.00366226	0.0236339	0.0118733	0.0246217	0.0207655	0.016039	0.0496281	0.0584377
Camkk2	grey	grey	0.0522338	0.004355	0.0322016	-0.0165714	0.0288593	-0.016176	-0.0315552	0.0346149	0.0705209
Camkmt	grey	grey	0.0618272	0.0159995	0.00566105	0.01959	0.0508481	0.0186355	0.0217893	0.0742292	0.100184
Caml	grey	grey	0.0400986	-0.0118296	0.0203725	0.00725152	0.0178175	-0.000377229	-0.0158446	0.0187029	0.0508486
Camsap1	grey	grey	0.0528613	0.000287866	0.0469783	-0.00377444	0.0291418	-0.014998	-0.0309681	0.026674	0.0680099
Camsap2	grey	grey	0.0416027	0.0234707	0.0143296	0.0330173	0.0401987	0.00773464	0.0151874	0.0549806	0.0807394
Camta2	grey	grey	-0.00296694	0.00273364	0.0120828	0.0284171	-0.015111	0.000950963	0.0125323	-0.00971402	0.00908857
Cand1	grey	grey	0.0540695	0.0148421	0.0385032	-0.000622752	0.0243572	-0.016347	-0.0137485	0.0463465	0.0774353
Canx	grey	grey	0.0346743	-0.0096222	0.0460468	0.0159075	0.00692765	-0.0326798	-0.0260986	0.00370805	0.0533928
Cap1	grey	grey	0.0412704	0.0304731	-0.0100902	0.0218523	0.0151759	0.00630535	0.0538681	0.0560679	0.0684427
Capn15	grey	grey	0.0354485	0.0111509	0.0417531	-0.00416354	0.0130409	-0.00204483	-0.0185483	0.0091563	0.0596493
Capn7	grey	grey	0.00779941	0.0225375	0.0105771	0.0477721	0.0124038	0.0227547	0.0143587	0.0279296	0.0581688
Caprin1	grey	grey	0.0455175	0.00152039	-0.00534037	0.0529957	0.0179822	0.00983927	0.0272647	0.0413527	0.0787137
Capza1	grey	grey	0.0519722	0.0242865	0.012053	0.0244689	0.0126471	0.00757504	0.0331957	0.0494391	0.0931217
Capza2	grey	grey	0.0277515	-0.00649151	-0.0126017	0.0462791	0.0126512	0.0100854	0.0357331	0.0415613	0.0484095
Capzb	grey	grey	0.0554374	-0.0053738	0.0376294	0.0145826	0.008979	-0.0092568	0.00727485	0.0284851	0.0435093
Carf	grey	grey	0.0149329	0.0191468	0.0028721	0.0309601	0.0356289	-0.00113736	0.0233765	0.0493274	0.0474959
Carm1	grey	grey	0.0275044	0.00926544	0.013791	0.00699111	-0.0014826	0.00802599	0.00367027	0.0200906	0.0491893
Carmil1	grey	grey	0.053796	0.0642496	0.0159313	0.00509164	0.0697464	0.120972	0.0257971	0.0915825	0.128192
Carnmt1	grey	grey	0.0222709	0.00224684	0.00435943	0.00283123	0.0201517	-0.0200831	-0.00329421	0.0133882	0.0389092
Cars	grey	grey	0.0475035	0.000933592	0.0412549	-0.0131989	-0.000722118	-0.0191212	-0.030433	-0.0077586	0.0427147
Cars2	grey	grey	0.0171434	0.00512003	0.0469447	-0.0147574	0.00065252	-0.00291389	-0.0359491	-0.0075676	0.0186913
Casc3	grey	grey	0.0355665	-0.000256372	0.0388288	0.000966658	0.00202547	0.00827056	-0.0213178	0.00491481	0.0530793
Casc4	grey	grey	0.0182445	0.0571158	0.0102176	0.0127495	0.0389907	0.0150421	0.0243195	0.0473227	0.0804795
Casd1	grey	grey	0.0360027	0.0182402	0.00855605	0.0271704	0.0346335	0.0262169	0.0144017	0.0600132	0.0727478
Casp12	grey	grey	0.00332299	0.0807705	0.0370715	-0.0119412	0.0135745	0.0444644	-0.0143606	0.0207294	0.0639284
Casp4	grey	grey	0.0144485	0.0348906	0.00671605	-0.00982652	0.0109373	0.0123507	0.0130908	0.0297353	0.0508891
Casp8ap2	grey	grey	0.0545598	0.00404929	0.0496686	0.00962009	0.00403477	-0.0238087	-0.0182301	0.0286813	0.0673749
Castor2	grey	grey	0.0116165	0.0150735	-0.0319079	-0.0370452	0.00247457	0.0164202	-0.00688767	0.0006468	-0.0294573
Catspere2	grey	grey	0.00374212	0.0265295	-0.00941767	0.0233208	0.0585623	0.0287425	0.0270093	0.0527619	0.0587955
Cbfa2t2	grey	grey	0.0718311	0.0300301	0.0166111	0.0165944	0.0356084	0.0212347	0.0138278	0.0801722	0.120012
Cbfb	grey	grey	0.0775759	0.00851567	-0.0107775	0.0225944	0.041345	0.0112594	0.0403804	0.106761	0.107438
Cbl	grey	grey	0.0758748	0.0128189	0.0251223	0.0121006	0.0242124	-0.0173439	-0.00179342	0.0556919	0.0902119
Cblb	grey	grey	0.137327	-0.0136035	-0.0284169	0.0770447	0.0734406	0.0535845	0.0793058	0.160136	0.177014
Cbwd1	grey	grey	0.0276726	0.0126924	0.0187172	-0.00546341	0.0199321	0.00161275	-0.0208439	0.0275343	0.0487891
Cbx1	grey	grey	0.0482658	0.0112002	0.0272342	0.00907458	0.0207157	0.00748854	-0.0128913	0.0270686	0.0677954
Cbx3	grey	grey	0.0326411	0.0247955	0.0283043	0.0166464	0.0145552	0.00862405	-0.00732712	0.0301226	0.0632263
Cbx6	grey	grey	-0.00806025	-0.0157509	-0.0307646	-0.0478207	-0.0294913	0.0150936	-0.0103925	-0.0290389	-0.0360192
Cbx7	grey	grey	-0.0303268	0.0190784	-0.00199692	0.0118644	-0.00739698	0.0203011	0.0205115	0.00568227	0.00551497
Cc2d2a	grey	grey	0.0423568	0.0204127	0.0272785	0.0254085	0.0694127	0.015102	0.0161067	0.0835859	0.0813163
Ccar1	grey	grey	0.0334133	0.0199521	0.00374876	0.0572962	0.0312918	0.0217355	0.0342133	0.0632426	0.0954686
Ccdc138	grey	grey	0.0659191	-0.0179854	0.0308451	-0.00295699	0.0201425	0.00429101	-0.0149404	0.0401689	0.0609901
Ccdc15	grey	grey	0.0125855	0.0197867	-0.0282118	0.0283128	0.0418456	0.0299865	0.0306827	0.0486493	0.0591899
Ccdc157	grey	grey	0.0297087	0.0128381	0.014444	-0.0118361	0.0272713	0.00536371	-0.0174951	0.0286973	0.0582771
Ccdc171	grey	grey	0.0647618	0.0410888	0.0147061	0.000967758	0.0409931	0.0152036	0.000969471	0.0780844	0.0940802
Ccdc174	grey	grey	0.0488566	0.0130268	0.032007	-0.00903451	0.0106481	-0.00461312	-0.0128553	0.0337964	0.0567172
Ccdc191	grey	grey	0.0299211	0.0206878	0.00332447	-0.000132012	0.0427667	0.000591627	0.0039278	0.0496911	0.0570263
Ccdc28b	grey	grey	0.017919	0.000802433	0.0204044	-0.00908854	0.00712056	-0.0012782	-0.00291182	0.00500703	0.0230669
Ccdc34	grey	grey	0.0434762	0.0134675	0.0349615	0.0150871	0.0460882	-0.00174334	-0.00519934	0.0494698	0.0751492
Ccdc47	grey	grey	0.00791923	-0.00490885	0.0149128	0.0146208	0.0155408	-0.0162234	-0.0088371	0.00917288	0.0362943
Ccdc50	grey	grey	0.0809046	0.00432085	-0.0285522	0.0759792	0.0635558	0.0259209	0.0790908	0.128293	0.130811
Ccdc57	grey	grey	0.0306276	-0.00628672	0.018134	-0.00511853	0.0222204	0.0197892	-0.00668697	0.0301715	0.0397947
Ccdc58	grey	grey	-0.0145389	0.00430555	-0.0219104	0.0293946	0.00870342	0.015238	0.0244741	0.0116214	0.0142571
Ccdc82	grey	grey	0.0501431	0.0417877	0.039744	0.0379883	0.0521532	0.0191471	0.0251159	0.0823155	0.111611
Ccdc88a	grey	grey	0.115337	0.0281495	0.0150081	0.0338759	0.0774921	-0.00482662	0.0233692	0.126317	0.157648
Ccdc91	grey	grey	0.0313133	0.0273004	0.038036	0.0305948	0.0348517	0.0136669	0.00390843	0.034573	0.064634
Ccdc93	grey	grey	0.0216347	0.0194914	0.0381735	-0.00129851	0.00948755	0.00886428	-0.0163753	0.0144631	0.0504196
Ccl25	grey	grey	0.0255022	0.032836	0.00730046	0.0103843	0.0257756	0.00500245	0.00573218	0.0445731	0.0753944
Ccm2	grey	grey	0.0459972	0.0614848	0.0267647	-0.0110953	0.0179645	0.0225218	0.0101437	0.0458753	0.0820539
Ccnc	grey	grey	0.0468109	0.00933932	0.0149008	-0.000263591	0.0154019	0.00141848	-0.000831778	0.0378042	0.0684708
Ccnh	grey	grey	0.00576237	0.0275363	-0.0153826	0.0410284	0.0344334	0.0380243	0.0311394	0.0439662	0.0668083
Ccni	grey	grey	0.0135908	0.0349531	-0.029075	0.0307886	0.0231293	0.0280432	0.0584599	0.0596849	0.0725664
Ccnl1	grey	grey	0.0102958	0.0543829	-0.0260469	0.0361164	0.0238141	0.0337301	0.126884	0.069682	0.0995397
Ccnl2	grey	grey	-0.00414914	0.0112637	0.024403	0.0748884	-0.00427357	0.0255862	0.0244135	0.000127231	0.0453052
Ccnt1	grey	grey	0.0212643	0.0125199	0.0169146	-0.000141915	0.00159739	0.0201338	0.022877	0.0225204	0.0578564
Ccnt2	grey	grey	0.0325821	0.0403335	-0.0141651	0.0668309	0.0362755	0.041008	0.066929	0.0858205	0.102791
Ccny	grey	grey	0.0627835	0.0550399	0.0147545	0.0421428	0.0476141	0.0342345	0.0470301	0.0934334	0.141203
Ccnyl1	grey	grey	0.0856528	-0.00749645	0.00479246	0.00723138	0.0136315	-0.0207176	0.00766479	0.0415332	0.0586982
Ccp110	grey	grey	0.0318287	0.00988168	0.0392717	-0.00177118	0.0234918	-0.0147748	-0.0157072	0.029504	0.0506057
Ccs	grey	grey	0.0368338	-0.00873747	0.0439876	-0.0158933	-0.0104733	-0.0112125	-0.0377117	-0.00667164	0.0205291
Ccser2	grey	grey	0.0399176	0.0347313	0.0175678	0.034543	0.0523349	0.00664386	0.0312149	0.0683454	0.0943358
Cct3	grey	grey	0.0287699	-0.00730144	0.0290537	-0.00366164	-0.00704459	-0.0177615	-0.009467	0.00511628	0.028493
Cct4	grey	grey	0.0241017	0.000234638	0.0218706	-0.00386983	0.00333026	-0.00222416	-0.0019625	0.00429385	0.0387909
Cct8	grey	grey	0.00250756	0.00889994	-0.00895038	0.0318506	0.0230389	0.00910675	0.0244992	0.0264609	0.0334527
Ccz1	grey	grey	0.0453469	0.00788836	0.0332693	-0.0108785	0.012717	0.00391669	-0.0290604	0.0214868	0.0611108
Cd2ap	grey	grey	0.0221556	0.0708313	-0.0350927	0.0659503	0.0671921	0.0543599	0.0882019	0.116886	0.134524
Cd302	grey	grey	0.0171565	0.025719	0.0382233	-0.0112394	0.0204645	0.0200551	-0.0287948	0.0246846	0.0428953
Cd46	grey	grey	-0.0146536	0.0738204	0.000119586	0.0128827	-0.00119318	0.0277046	0.0398414	0.048209	0.0580461
Cd47	grey	grey	0.0931844	0.0253562	-0.0219854	0.0364824	0.0183737	0.05103	0.0498071	0.102012	0.120663
Cd63	grey	grey	-0.0209253	0.00672486	-0.0656142	0.0197557	-0.0109624	-0.0184056	0.0535421	6.39e-05	-0.0208403
Cd81	grey	grey	0.0219683	-0.0516203	-0.00228118	0.0421644	0.00765833	-0.0256937	0.00328949	0.00619092	-0.015411
Cd99l2	grey	grey	0.0219728	0.0185341	-0.0177857	0.026327	0.0149161	0.0160325	0.0323074	0.0358199	0.0557367
Cdadc1	grey	grey	0.022228	0.00588647	0.0244543	0.0199148	0.0144452	0.0163731	0.000784244	0.0263222	0.0600939
Cdc123	grey	grey	0.0502904	0.0105677	0.0279083	0.00218308	0.014921	0.00665845	-0.0170295	0.0378749	0.0645235
Cdc14a	grey	grey	0.0137168	0.0232897	0.0428453	0.0158414	0.0167986	0.0362485	0.00261846	0.0183795	0.0580664
Cdc14b	grey	grey	0.0528119	-0.00662731	0.0198377	0.0287278	0.0582369	-0.00959869	0.0133054	0.0512292	0.0579156
Cdc16	grey	grey	0.00987507	0.0306739	-0.00500594	0.0118541	0.00076452	0.0107116	0.0219758	0.0272426	0.0430816
Cdc23	grey	grey	0.0109127	0.0246926	0.0104463	0.0111772	-0.000260538	-0.00597008	-0.000197472	0.0134729	0.0485057
Cdc26	grey	grey	-0.00458016	0.0441022	-0.0187053	0.0313423	0.0127673	0.0198878	0.0323206	0.0449713	0.0528003
Cdc27	grey	grey	0.0589797	0.00581496	0.025187	0.00307656	0.0213042	-0.00137779	0.00418491	0.0428024	0.0850527
Cdc37l1	grey	grey	0.013427	0.00915997	0.00109533	0.0555358	0.0136	0.0319047	0.021028	0.0321507	0.0704813
Cdc40	grey	grey	0.037927	0.00161237	0.0424481	-0.00863058	0.0174572	-0.0158684	-0.0320091	0.0229402	0.0553783
Cdc42	grey	grey	0.059559	0.0554324	-0.0218705	0.0315962	0.0200449	0.0555212	0.0764732	0.0910214	0.125396
Cdc42bpa	grey	grey	0.118039	0.00591938	0.00328626	0.0326409	0.0944201	0.0168908	0.0416819	0.147503	0.167488
Cdc42ep5	grey	grey	0.00781914	0.0556949	0.00251275	-0.000825049	0.0146836	0.00396161	0.0296908	0.0243825	0.0469818
Cdc42se2	grey	grey	0.0396909	0.0557004	0.0345226	-0.0253756	0.0100408	-0.0117672	-0.0144192	0.03881	0.0760086
Cdc5l	grey	grey	0.0267278	0.0102379	0.0586821	-0.0120071	-0.00977347	-0.021258	-0.0329366	0.0030467	0.0354843
Cdc73	grey	grey	0.0271876	0.0320811	-0.0247582	0.0731809	0.051243	0.0299227	0.0683314	0.108101	0.12721
Cdip1	grey	grey	0.025879	0.014572	-0.00914148	0.0233532	0.0352647	0.018863	0.0283864	0.0521992	0.0633117
Cdk11b	grey	grey	0.0505054	0.0176365	0.03971	0.0114978	0.0078214	0.00554632	0.0108941	0.0244554	0.0654183
Cdk12	grey	grey	0.0570401	0.0429252	-0.0155253	0.0480261	0.0433055	0.0325306	0.033577	0.0818847	0.119145
Cdk16	grey	grey	0.0181123	-0.0039151	0.0253646	0.0344328	0.000911656	-0.000438228	-0.00194145	0.0138797	0.0364477
Cdk17	grey	grey	0.083381	-0.0119017	0.0112415	0.0321648	0.0280919	-0.0146413	0.0243223	0.0612619	0.0820653
Cdk19	grey	grey	0.0536502	0.022816	0.0407168	-0.00104877	0.047902	0.0222937	-0.00447352	0.0675227	0.0938785
Cdk6	grey	grey	0.0500088	0.091074	0.023144	0.0260292	0.0429597	0.0126157	0.0271549	0.0892554	0.121712
Cdk7	grey	grey	0.0242423	0.0297088	0.00240397	0.0210143	0.0199094	0.0244896	0.0182729	0.0370848	0.0797538
Cdk9	grey	grey	-0.00339325	-0.00665782	0.0156577	0.0194767	0.00820636	-0.00489544	-0.0078327	-0.0227286	-0.00613857
Cdkal1	grey	grey	0.00428578	0.0683665	-0.0279518	0.0833926	0.0507638	0.0413243	0.084134	0.0916225	0.106531
Cdkn1b	grey	grey	0.0270951	0.00616804	0.0416713	-2.62e-05	0.00304363	0.014914	-0.0244226	0.00994246	0.0512834
Cdon	grey	grey	0.0929008	-0.086919	0.0299826	0.0232094	0.112654	0.064655	-0.025215	0.101626	0.0963456
Cdr2	grey	grey	0.0661722	0.0344788	0.0376154	-0.0175842	-0.0199003	-0.0158478	0.00342613	0.0189474	0.0726313
Cds2	grey	grey	-0.0155007	0.0191289	0.0232808	0.0367975	-0.0109186	0.0358037	0.0191736	0.0135221	0.0287663
Cdyl	grey	grey	0.0964908	-0.0132444	0.00496657	0.0410466	0.0407537	-0.000576651	0.0171904	0.0745438	0.10956
Cdyl2	grey	grey	0.0109283	0.0425263	0.00629066	0.00620034	-0.00100238	0.00312502	0.0243475	0.0273104	0.0496395
Cebpg	grey	grey	0.0741899	-0.0109482	0.00347819	0.0266542	0.0314954	-0.00907753	0.0260165	0.0597332	0.099161
Cecr2	grey	grey	-0.0670595	0.100663	-0.0287	0.0673509	-0.0357144	0.0580426	0.080671	-0.00392163	0.0265288
Celf1	grey	grey	0.084246	0.0339757	-0.0134907	0.0460317	0.0319917	0.00603728	0.0397592	0.0874601	0.13418
Celf2	grey	grey	0.0836158	0.0498564	-0.114498	0.0755424	0.0217184	0.289435	0.121649	0.196144	0.167119
Cenpc1	grey	grey	0.0501569	0.0214613	0.0186814	0.0159772	0.0398626	0.00766196	0.0116263	0.0526521	0.0798734
Cenpp	grey	grey	0.0146138	0.0337332	-0.066607	0.063648	0.0494802	0.0342542	0.069248	0.0855031	0.0664331
Cep112	grey	grey	0.0793083	0.0405265	0.030232	0.00841305	0.0608049	0.0413794	0.0154064	0.105247	0.131246
Cep120	grey	grey	0.049817	0.0343807	0.0304834	0.00310882	0.0386373	0.0163899	0.00109566	0.0571333	0.0808329
Cep128	grey	grey	0.0013309	0.0275018	0.00324934	0.0317454	0.0421696	0.0452516	0.0296534	0.0743586	0.076216
Cep135	grey	grey	0.0367338	-0.000526099	0.0331868	-0.00390421	0.000888077	-0.010521	-0.0230785	0.0194801	0.0323745
Cep162	grey	grey	0.0670668	0.0167441	0.0488947	0.000192524	0.0371066	-0.00654198	-0.0203482	0.0449804	0.0817441
Cep164	grey	grey	0.0500401	0.00196737	0.0639805	-0.01039	0.0207	-0.0126586	-0.0362751	0.0166621	0.0526766
Cep192	grey	grey	0.0462671	0.0054881	0.0206377	0.00665343	0.02824	-0.013673	-0.003853	0.0357409	0.058202
Cep295	grey	grey	0.0257749	0.0226503	0.0259842	0.0163155	0.0305474	0.0213653	0.00853592	0.0482054	0.0692915
Cep350	grey	grey	0.0677451	0.0316875	0.0285266	0.0306066	0.0577055	0.00492247	0.0139723	0.0794799	0.127396
Cep57l1	grey	grey	0.00183291	0.0117576	0.0213302	0.000891068	0.00123087	0.0241803	-0.00815505	0.0141137	0.0325175
[truncated: 3,257 more rows]
