# Supplementary material for: Cardiorenal heart failure with preserved ejection fraction is caused by a reversible rise of mineralocorticoid-induced fibroblast subtypes
Source: Research Square preprint supplement (doi:10.21203/rs.3.rs-7039115/v1), 2025-07-14
Supplement: Supplementary file 3 [file 1cee69a452d4c1e76d5377dd.xlsx]

## Sheet: full object
sample_id	treatment	CM	EC-cap	FB	PER	MΦ	EC-art	EC-end	SMC	EC-lym	CYC	BC	SC	TC
LV_2108	CTRL	48.3813	12.279	18.0724	6.95421	8.4558	1.2886	0.990415	1.60809	0.372737	0.468584	0.244941	0.404686	0.479233
LV_2109	CTRL	52.2508	19.3002	12.9761	6.30581	4.0277	1.56734	1.33042	0.82012	0.218699	0.309823	0.309823	0.346273	0.236924
LV_2114	CTRL	43.6543	18.9011	18.0426	6.93948	7.05394	1.43082	0.729718	1.30205	0.55802	0.429246	0.414938	0.343397	0.200315
LV_2115	CTRL	44.6055	32.562	8.22414	4.82297	2.87148	1.33817	2.14664	1.36604	0.418177	0.446055	0.278784	0.613326	0.306663
LV_2110	ALDO	49.1071	14.5714	15.7976	7.19048	6.52381	1.08333	0.72619	1.25	0.630952	1.5	0.452381	0.464286	0.702381
LV_2111	ALDO	44.447	24.3908	12.1368	5.48266	3.65511	1.75726	2.43674	1.9447	0.960637	2.03843	0.187441	0.328022	0.234302
LV_2112	ALDO	46.6907	28.0799	9.33814	5.70118	2.52294	2.49017	1.86763	1.63827	0.458716	0.688073	0.196592	0.163827	0.163827
LV_2113	ALDO	41.9491	17.3579	18.2891	8.63021	8.60855	1.14781	1.23443	0.844613	0.422306	0.606389	0.357336	0.346508	0.205739
LV_2310	REC	31.6484	31.0119	16.2314	7.92848	5.19517	2.26528	1.34794	1.54451	0.870542	0.383787	0.458673	0.430591	0.683329
LV_2311	REC	36.3984	27.5774	15.592	7.44301	4.89963	2.42429	1.67574	1.53113	1.01225	0.306227	0.39129	0.442327	0.306227
LV_2312	REC	33.0651	26.4588	17.2144	7.70177	7.32171	1.8444	2.67159	1.00604	0.883076	0.223564	0.793651	0.413593	0.402414
LV_2313	REC	38.0886	24.4831	15.6299	7.94961	6.27281	2.05908	0.929626	1.46829	1.23371	0.356212	0.538662	0.469157	0.521286

## Sheet: FB subcluster
sample_id	treatment	FB_0	FB_1	FB_2	FB_3	FB_4	FB_5
LV_2108	CTRL	20.3889	69.4755	8.24985	0.176783	1.53212	0.176783
LV_2109	CTRL	5.75843	88.4831	5.33708	0.280899	0.140449	0
LV_2114	CTRL	7.4544	25.7732	64.7105	0.634417	1.42744	0
LV_2115	CTRL	71.5254	3.72881	18.9831	4.74576	0.677966	0.338983
LV_2110	ALDO	68.0482	17.483	10.6255	2.26074	1.58252	0
LV_2111	ALDO	72.2008	1.1583	12.9344	9.45946	3.28185	0.965251
LV_2112	ALDO	59.2982	1.05263	32.9825	2.45614	1.05263	3.15789
LV_2113	ALDO	78.6856	0.888099	16.045	0.17762	0.473653	3.73002
LV_2310	REC	4.90196	80.5075	13.1488	0.0576701	1.32641	0.0576701
LV_2311	REC	73.868	7.14675	15.7665	2.50955	0.436443	0.272777
LV_2312	REC	74.2857	1.03896	12.6623	6.81818	0.909091	4.28571
LV_2313	REC	44.4136	2.11228	49.8054	0.222346	3.2796	0.166759

## Sheet: CM subcluster
sample_id	treatment	CM_0	CM_1	CM_2	CM_3	CM_4
LV_2108	CTRL	0.418226	93.7486	2.92758	0.242131	2.66344
LV_2109	CTRL	2.02302	81.2696	13.2194	0.697593	2.79037
LV_2114	CTRL	11.9633	41.3307	16.1586	29.728	0.819403
LV_2115	CTRL	85.625	3.1875	8.375	2.25	0.5625
LV_2110	ALDO	74.1333	1.01818	19.0788	5.06667	0.70303
LV_2111	ALDO	62.6252	1.7923	21.0332	13.3896	1.15973
LV_2112	ALDO	60.2807	0.140351	16.7719	21.8246	0.982456
LV_2113	ALDO	83.3764	0.33557	14.0681	1.52297	0.696954
LV_2310	REC	0.414079	62.4371	11.3872	24.6968	1.06477
LV_2311	REC	49.8715	25.3564	22.9493	0.327179	1.49568
LV_2312	REC	91.2779	1.85936	5.57809	0.169033	1.11562
LV_2313	REC	36.1542	38.1843	24.9772	0.296533	0.387774

## Sheet: EC subcluster
sample_id	treatment	EC_0	EC_1	EC_2	EC_3	EC_4	EC_5
LV_2108	CTRL	50.1427	18.2596	14.7646	7.77461	6.49073	2.56776
LV_2109	CTRL	14.065	60.813	12.5203	5.60976	5.93496	1.05691
LV_2114	CTRL	6.7505	71.6744	9.66248	5.95632	3.37525	2.58107
LV_2115	CTRL	65.9786	15.4434	8.33333	3.21101	5.88685	1.14679
LV_2110	ALDO	55.2134	16.585	14.9055	5.3184	4.19874	3.77887
LV_2111	ALDO	60.8247	10.3886	11.816	5.63045	8.32672	3.01348
LV_2112	ALDO	56.7729	16.2351	12.5498	7.47012	5.57769	1.39442
LV_2113	ALDO	59.3448	10.5263	16.3802	5.6391	6.01504	2.09452
LV_2310	REC	16.693	60.1793	11.4979	5.327	3.82384	2.4789
LV_2311	REC	57.4031	16.2633	11.8657	6.24512	5.1262	3.09654
LV_2312	REC	60.4912	10.8772	12.1754	5.15789	8.52632	2.77193
LV_2313	REC	54.1465	19.2191	12.2579	6.84019	3.2385	4.29782
