# Supplementary material for: Cardiorenal heart failure with preserved ejection fraction is caused by a reversible rise of mineralocorticoid-induced fibroblast subtypes
Source: Research Square preprint supplement (doi:10.21203/rs.3.rs-7039115/v1), 2025-07-14
Supplement: Supplementary file 4 [file 28053f4e0cb35e8aa8df4941.xlsx]

## Sheet: all.markers_FB_integrated
	p_val	avg_log2FC	pct.1	pct.2	p_val_adj	cluster	gene
Pi16	0	2.31362	0.666	0.243	0	FB_I	Pi16
Clec3b	0	1.72599	0.739	0.34	0	FB_I	Clec3b
Cd34	0	1.56776	0.765	0.38	0	FB_I	Cd34
Rpl35	0	1.30137	0.647	0.266	0	FB_I	Rpl35
Crip1	0	1.81903	0.683	0.305	0	FB_I	Crip1
Rpl36a	0	1.21072	0.634	0.258	0	FB_I	Rpl36a
Rpl31	0	1.23966	0.646	0.271	0	FB_I	Rpl31
Rpl23a	0	1.26964	0.657	0.283	0	FB_I	Rpl23a
Rps17	0	1.20275	0.64	0.268	0	FB_I	Rps17
Rps3	0	1.18171	0.646	0.274	0	FB_I	Rps3
Rpl32	0	1.17002	0.656	0.285	0	FB_I	Rpl32
Rpl14	0	1.22906	0.658	0.287	0	FB_I	Rpl14
Rpl26	0	1.21771	0.657	0.286	0	FB_I	Rpl26
Rpl39	0	1.11485	0.66	0.29	0	FB_I	Rpl39
Rps11	0	1.26924	0.652	0.282	0	FB_I	Rps11
Rps5	0	1.2893	0.661	0.294	0	FB_I	Rps5
Rpl4	0	1.26565	0.649	0.282	0	FB_I	Rpl4
Rpl15	0	1.16384	0.638	0.271	0	FB_I	Rpl15
Rps25	0	1.16206	0.64	0.273	0	FB_I	Rps25
Rps7	0	1.1639	0.647	0.28	0	FB_I	Rps7
Rps15a	0	1.16357	0.665	0.299	0	FB_I	Rps15a
Rplp2	0	1.13605	0.661	0.295	0	FB_I	Rplp2
Rpl34	0	1.20466	0.651	0.286	0	FB_I	Rpl34
Rps6	0	1.15778	0.654	0.289	0	FB_I	Rps6
Rplp0	0	1.21145	0.663	0.298	0	FB_I	Rplp0
Rpl19	0	1.21825	0.66	0.295	0	FB_I	Rpl19
Rps18	0	1.1973	0.666	0.301	0	FB_I	Rps18
Rpl7	0	1.18928	0.643	0.278	0	FB_I	Rpl7
Rpl9	0	1.24834	0.658	0.294	0	FB_I	Rpl9
Rps27a	0	1.11344	0.669	0.305	0	FB_I	Rps27a
Rpl37	0	1.24405	0.667	0.303	0	FB_I	Rpl37
Rpl24	0	1.21025	0.654	0.29	0	FB_I	Rpl24
S100a6	0	1.50622	0.754	0.39	0	FB_I	S100a6
Rps4x	0	1.26252	0.666	0.303	0	FB_I	Rps4x
Rpl11	0	1.14181	0.659	0.296	0	FB_I	Rpl11
Rps19	0	1.22938	0.666	0.303	0	FB_I	Rps19
Rps16	0	1.19462	0.675	0.312	0	FB_I	Rps16
Rpl38	0	1.09548	0.652	0.289	0	FB_I	Rpl38
Rps23	0	1.23677	0.668	0.305	0	FB_I	Rps23
Rps20	0	1.16657	0.655	0.293	0	FB_I	Rps20
Rpl3	0	1.20329	0.653	0.291	0	FB_I	Rpl3
Rps26	0	1.11248	0.626	0.264	0	FB_I	Rps26
Rpl21	0	1.1643	0.658	0.297	0	FB_I	Rpl21
Rpl13a	0	1.19136	0.665	0.304	0	FB_I	Rpl13a
Rpl18	0	1.22241	0.646	0.285	0	FB_I	Rpl18
Rpl27a	0	1.12865	0.669	0.308	0	FB_I	Rpl27a
Rpl23	0	1.11646	0.665	0.304	0	FB_I	Rpl23
Rps28	0	1.20424	0.669	0.308	0	FB_I	Rps28
Rpl17	0	1.19201	0.667	0.306	0	FB_I	Rpl17
Tmsb10	0	1.22465	0.645	0.285	0	FB_I	Tmsb10
Rps14	0	1.27138	0.67	0.31	0	FB_I	Rps14
Rpl27	0	1.19818	0.611	0.251	0	FB_I	Rpl27
Rps27	0	1.24423	0.668	0.309	0	FB_I	Rps27
Rps13	0	1.13645	0.644	0.285	0	FB_I	Rps13
Rpl36	0	1.18776	0.666	0.307	0	FB_I	Rpl36
Rpl37a	0	1.20712	0.671	0.313	0	FB_I	Rpl37a
Rps21	0	1.02439	0.66	0.302	0	FB_I	Rps21
Fau	0	1.18084	0.658	0.3	0	FB_I	Fau
S100a10	0	1.73139	0.612	0.254	0	FB_I	S100a10
Ifitm2	0	1.32799	0.636	0.278	0	FB_I	Ifitm2
Rpl8	0	1.17834	0.663	0.306	0	FB_I	Rpl8
Rpl6	0	1.14674	0.674	0.318	0	FB_I	Rpl6
Rpl30	0	1.20383	0.634	0.278	0	FB_I	Rpl30
Rps9	0	1.21346	0.672	0.317	0	FB_I	Rps9
Ifitm3	0	1.29801	0.652	0.297	0	FB_I	Ifitm3
Rpl18a	0	1.21193	0.668	0.313	0	FB_I	Rpl18a
Rps24	0	1.18957	0.678	0.323	0	FB_I	Rps24
Rpl35a	0	1.19356	0.671	0.316	0	FB_I	Rpl35a
Rpl7a	0	1.23123	0.613	0.258	0	FB_I	Rpl7a
Rps10	0	1.14872	0.626	0.271	0	FB_I	Rps10
Ftl1	0	1.48294	0.684	0.33	0	FB_I	Ftl1
Rps29	0	1.21567	0.675	0.321	0	FB_I	Rps29
Rpl10	0	1.20504	0.679	0.326	0	FB_I	Rpl10
Fbln2	0	1.32381	0.684	0.331	0	FB_I	Fbln2
Rps15	0	1.21304	0.674	0.321	0	FB_I	Rps15
Rplp1	0	1.1043	0.674	0.321	0	FB_I	Rplp1
Ubb	0	1.37974	0.666	0.313	0	FB_I	Ubb
Rpl28	0	1.12011	0.637	0.285	0	FB_I	Rpl28
Rpl10a	0	1.08079	0.654	0.302	0	FB_I	Rpl10a
Uba52	0	1.29626	0.589	0.237	0	FB_I	Uba52
Rpl22	0	1.18996	0.604	0.253	0	FB_I	Rpl22
Rpl41	0	0.993097	0.675	0.325	0	FB_I	Rpl41
Rpsa	0	1.03053	0.659	0.309	0	FB_I	Rpsa
Rps3a1	0	1.14251	0.631	0.281	0	FB_I	Rps3a1
Ppia	0	1.20558	0.642	0.294	0	FB_I	Ppia
Nme2	0	1.22513	0.567	0.219	0	FB_I	Nme2
Lum	0	1.17462	0.689	0.342	0	FB_I	Lum
Rpl13	0	1.3049	0.681	0.335	0	FB_I	Rpl13
Rps2	0	1.13977	0.659	0.314	0	FB_I	Rps2
Rpl22l1	0	1.07182	0.611	0.266	0	FB_I	Rpl22l1
Lgals1	0	1.05957	0.696	0.351	0	FB_I	Lgals1
Rps12	0	0.98971	0.667	0.323	0	FB_I	Rps12
S100a11	0	1.29725	0.597	0.253	0	FB_I	S100a11
Sec61g	0	1.04483	0.591	0.247	0	FB_I	Sec61g
Tpt1	0	1.17359	0.682	0.339	0	FB_I	Tpt1
Mfap5	0	1.37527	0.675	0.333	0	FB_I	Mfap5
Tuba1a	0	1.49874	0.617	0.275	0	FB_I	Tuba1a
mt-Nd4	0	1.00818	0.682	0.341	0	FB_I	mt-Nd4
Rps8	0	1.19677	0.69	0.349	0	FB_I	Rps8
Dynll1	0	1.24579	0.606	0.265	0	FB_I	Dynll1
Chchd2	0	1.15535	0.581	0.241	0	FB_I	Chchd2
Fth1	0	1.23982	0.694	0.354	0	FB_I	Fth1
Serf2	0	0.993259	0.654	0.315	0	FB_I	Serf2
mt-Nd1	0	1.06332	0.677	0.338	0	FB_I	mt-Nd1
Rpl12	0	1.00606	0.606	0.267	0	FB_I	Rpl12
Cox4i1	0	1.20975	0.598	0.259	0	FB_I	Cox4i1
Uap1	0	2.0027	0.559	0.221	0	FB_I	Uap1
mt-Cytb	0	1.06176	0.709	0.371	0	FB_I	mt-Cytb
Gpx3	0	1.31513	0.677	0.34	0	FB_I	Gpx3
Gstm1	0	1.42079	0.587	0.251	0	FB_I	Gstm1
Cd63	0	1.21087	0.616	0.281	0	FB_I	Cd63
Cd81	0	1.16207	0.642	0.308	0	FB_I	Cd81
Oaz1	0	1.06998	0.626	0.293	0	FB_I	Oaz1
mt-Atp6	0	1.0925	0.719	0.387	0	FB_I	mt-Atp6
Serpinh1	0	1.12606	0.653	0.324	0	FB_I	Serpinh1
Eef2	0	1.21386	0.642	0.313	0	FB_I	Eef2
Eef1a1	0	1.23914	0.722	0.393	0	FB_I	Eef1a1
Camk2n1	0	1.54446	0.542	0.215	0	FB_I	Camk2n1
Eif1	0	1.3201	0.698	0.371	0	FB_I	Eif1
Timp2	0	1.17747	0.685	0.359	0	FB_I	Timp2
Pfdn5	0	1.15431	0.556	0.231	0	FB_I	Pfdn5
Igfbp4	0	1.11957	0.664	0.339	0	FB_I	Igfbp4
Rnase4	0	1.28432	0.603	0.278	0	FB_I	Rnase4
mt-Nd2	0	0.960552	0.626	0.303	0	FB_I	mt-Nd2
Cox8a	0	1.14695	0.566	0.243	0	FB_I	Cox8a
Ybx1	0	1.1428	0.611	0.289	0	FB_I	Ybx1
Pfn1	0	1.1903	0.563	0.241	0	FB_I	Pfn1
Igfbp6	0	2.04097	0.45	0.129	0	FB_I	Igfbp6
Rarres2	0	1.33582	0.586	0.265	0	FB_I	Rarres2
Atp5l	0	1.15805	0.572	0.251	0	FB_I	Atp5l
Gabarap	0	1.06419	0.569	0.248	0	FB_I	Gabarap
Naca	0	1.09643	0.585	0.265	0	FB_I	Naca
Gfpt2	0	1.6108	0.618	0.299	0	FB_I	Gfpt2
mt-Co2	0	0.98504	0.709	0.39	0	FB_I	mt-Co2
Arpc1b	0	1.08618	0.623	0.305	0	FB_I	Arpc1b
Emp3	0	1.5725	0.528	0.211	0	FB_I	Emp3
Tspo	0	1.51491	0.521	0.204	0	FB_I	Tspo
Hsp90ab1	0	1.20002	0.656	0.339	0	FB_I	Hsp90ab1
Crip2	0	1.36456	0.585	0.269	0	FB_I	Crip2
Eef1g	0	0.977258	0.596	0.28	0	FB_I	Eef1g
Calm1	0	1.28239	0.57	0.255	0	FB_I	Calm1
Jund	0	1.51547	0.666	0.352	0	FB_I	Jund
B2m	0	1.08851	0.637	0.323	0	FB_I	B2m
Rpl5	0	1.0962	0.57	0.256	0	FB_I	Rpl5
Eif3f	0	1.25028	0.529	0.216	0	FB_I	Eif3f
Pmp22	0	1.26692	0.661	0.349	0	FB_I	Pmp22
Krtcap2	0	1.2369	0.526	0.215	0	FB_I	Krtcap2
Tmsb4x	0	1.01572	0.69	0.38	0	FB_I	Tmsb4x
Calr	0	1.12669	0.572	0.262	0	FB_I	Calr
Cox6c	0	0.974547	0.561	0.252	0	FB_I	Cox6c
Ptma	0	1.01846	0.705	0.397	0	FB_I	Ptma
Eif5a	0	1.1751	0.505	0.199	0	FB_I	Eif5a
Btf3	0	1.14653	0.526	0.222	0	FB_I	Btf3
Prdx1	0	1.05178	0.594	0.29	0	FB_I	Prdx1
Anxa2	0	1.19154	0.622	0.319	0	FB_I	Anxa2
Ctsl	0	1.13191	0.569	0.267	0	FB_I	Ctsl
Ecm1	0	1.30456	0.508	0.207	0	FB_I	Ecm1
Fkbp1a	0	1.01192	0.59	0.289	0	FB_I	Fkbp1a
Mrfap1	0	1.15449	0.514	0.214	0	FB_I	Mrfap1
Pcolce	0	1.13256	0.67	0.37	0	FB_I	Pcolce
Axl	0	1.11224	0.767	0.467	0	FB_I	Axl
Cst3	0	0.505962	0.663	0.364	0	FB_I	Cst3
Prelp	0	0.911761	0.529	0.231	0	FB_I	Prelp
Tuba1b	0	1.2775	0.496	0.198	0	FB_I	Tuba1b
Lamp1	0	1.08969	0.568	0.27	0	FB_I	Lamp1
Nenf	0	1.14471	0.521	0.224	0	FB_I	Nenf
Adgrd1	0	1.92922	0.447	0.15	0	FB_I	Adgrd1
Rpl36al	0	1.11546	0.505	0.208	0	FB_I	Rpl36al
Gng5	0	1.22865	0.494	0.198	0	FB_I	Gng5
Emp1	0	0.987906	0.597	0.302	0	FB_I	Emp1
Hspa8	0	1.25836	0.565	0.271	0	FB_I	Hspa8
Uqcrh	0	1.05466	0.533	0.24	0	FB_I	Uqcrh
Myl6	0	0.908551	0.661	0.369	0	FB_I	Myl6
Rpl29	0	1.26078	0.496	0.204	0	FB_I	Rpl29
Klf4	0	1.66762	0.488	0.196	0	FB_I	Klf4
Serpine2	0	1.25106	0.524	0.233	0	FB_I	Serpine2
Gpx4	0	1.04608	0.52	0.229	0	FB_I	Gpx4
Ppib	0	0.966099	0.543	0.254	0	FB_I	Ppib
Tagln2	0	1.07322	0.52	0.232	0	FB_I	Tagln2
Entpd2	0	1.06589	0.533	0.245	0	FB_I	Entpd2
Cfl1	0	1.11817	0.512	0.224	0	FB_I	Cfl1
Snrpg	0	1.08354	0.487	0.199	0	FB_I	Snrpg
Atp5e	0	1.00217	0.505	0.218	0	FB_I	Atp5e
Itm2b	0	0.998566	0.725	0.438	0	FB_I	Itm2b
mt-Co3	0	1.06279	0.737	0.45	0	FB_I	mt-Co3
Mmp2	0	0.896764	0.632	0.346	0	FB_I	Mmp2
Ly6a	0	2.16896	0.401	0.115	0	FB_I	Ly6a
Eef1b2	0	0.977745	0.491	0.206	0	FB_I	Eef1b2
Rps27l	0	1.25485	0.459	0.174	0	FB_I	Rps27l
Cd9	0	1.32846	0.501	0.218	0	FB_I	Cd9
Hspa5	0	1.13052	0.582	0.3	0	FB_I	Hspa5
Vim	0	0.613019	0.741	0.46	0	FB_I	Vim
Anxa1	0	1.2506	0.532	0.252	0	FB_I	Anxa1
Hsp90b1	0	0.981754	0.595	0.315	0	FB_I	Hsp90b1
Lpl	0	1.13763	0.618	0.338	0	FB_I	Lpl
Rabac1	0	1.03812	0.532	0.253	0	FB_I	Rabac1
Ctsb	0	1.06125	0.512	0.233	0	FB_I	Ctsb
Laptm4a	0	0.85315	0.629	0.35	0	FB_I	Laptm4a
Hint1	0	1.12236	0.485	0.207	0	FB_I	Hint1
Uqcrb	0	1.23714	0.472	0.194	0	FB_I	Uqcrb
Calm2	0	0.856379	0.615	0.337	0	FB_I	Calm2
Ndufa2	0	1.08757	0.478	0.2	0	FB_I	Ndufa2
Fxyd1	0	1.1169	0.497	0.22	0	FB_I	Fxyd1
H2-D1	0	0.990749	0.536	0.259	0	FB_I	H2-D1
Bgn	0	1.02179	0.77	0.494	0	FB_I	Bgn
Atp6v1g1	0	1.26369	0.459	0.183	0	FB_I	Atp6v1g1
Eef1d	0	1.03192	0.491	0.215	0	FB_I	Eef1d
Atp5j	0	1.03617	0.494	0.218	0	FB_I	Atp5j
Sumo2	0	0.884797	0.577	0.301	0	FB_I	Sumo2
Txn1	0	1.22169	0.464	0.189	0	FB_I	Txn1
Bsg	0	0.94674	0.508	0.233	0	FB_I	Bsg
Tomm6	0	1.12831	0.459	0.184	0	FB_I	Tomm6
Cox7a2l	0	1.14077	0.482	0.207	0	FB_I	Cox7a2l
Tmed3	0	1.08584	0.471	0.196	0	FB_I	Tmed3
Tmed2	0	0.968056	0.551	0.277	0	FB_I	Tmed2
Cox7c	0	0.911836	0.549	0.275	0	FB_I	Cox7c
Dpt	0	0.71673	0.717	0.443	0	FB_I	Dpt
Aldoa	0	1.08171	0.505	0.232	0	FB_I	Aldoa
Klf2	0	1.49671	0.542	0.269	0	FB_I	Klf2
Hsp90aa1	0	1.40275	0.491	0.218	0	FB_I	Hsp90aa1
H3f3a	0	0.847785	0.568	0.295	0	FB_I	H3f3a
Sparcl1	0	1.21656	0.707	0.434	0	FB_I	Sparcl1
Psap	0	1.0013	0.543	0.271	0	FB_I	Psap
Pla1a	0	1.15509	0.463	0.191	0	FB_I	Pla1a
Gapdh	0	1.22036	0.461	0.19	0	FB_I	Gapdh
S100a16	0	1.36923	0.441	0.171	0	FB_I	S100a16
Cox6b1	0	1.00114	0.482	0.212	0	FB_I	Cox6b1
Sparc	0	0.662243	0.77	0.5	0	FB_I	Sparc
Anxa5	0	1.22058	0.576	0.306	0	FB_I	Anxa5
Dstn	0	0.910133	0.549	0.28	0	FB_I	Dstn
Sec61b	0	0.946232	0.442	0.173	0	FB_I	Sec61b
Nupr1	0	1.33047	0.462	0.193	0	FB_I	Nupr1
Npc2	0	0.94965	0.49	0.221	0	FB_I	Npc2
Cox6a1	0	1.15831	0.462	0.194	0	FB_I	Cox6a1
Capns1	0	1.04872	0.533	0.265	0	FB_I	Capns1
Tppp3	0	1.88922	0.388	0.12	0	FB_I	Tppp3
Smdt1	0	1.15044	0.461	0.194	0	FB_I	Smdt1
Cygb	0	0.92512	0.717	0.452	0	FB_I	Cygb
Gng10	0	1.32693	0.422	0.158	0	FB_I	Gng10
Tomm7	0	1.19736	0.442	0.178	0	FB_I	Tomm7
Spon2	0	1.68795	0.374	0.11	0	FB_I	Spon2
Col6a1	0	0.802668	0.614	0.35	0	FB_I	Col6a1
Map1lc3b	0	1.01135	0.482	0.218	0	FB_I	Map1lc3b
Tmed9	0	1.01143	0.495	0.231	0	FB_I	Tmed9
Hmgb1	0	0.767153	0.572	0.308	0	FB_I	Hmgb1
Cd302	0	1.02477	0.503	0.24	0	FB_I	Cd302
Nbl1	0	2.05712	0.368	0.105	0	FB_I	Nbl1
Npm1	0	0.858933	0.49	0.227	0	FB_I	Npm1
Mtch1	0	0.795364	0.608	0.346	0	FB_I	Mtch1
mt-Co1	0	0.870554	0.748	0.486	0	FB_I	mt-Co1
Pdia3	0	0.945478	0.548	0.287	0	FB_I	Pdia3
Manf	0	1.11079	0.503	0.242	0	FB_I	Manf
Ddah2	0	1.38501	0.433	0.172	0	FB_I	Ddah2
Myl12a	0	0.871788	0.568	0.307	0	FB_I	Myl12a
Pdia6	0	1.12281	0.482	0.222	0	FB_I	Pdia6
Cd55	0	1.49498	0.428	0.169	0	FB_I	Cd55
Ndufa13	0	0.9539	0.478	0.219	0	FB_I	Ndufa13
Actg1	0	1.14075	0.689	0.43	0	FB_I	Actg1
Gnb2	0	1.04727	0.484	0.226	0	FB_I	Gnb2
Oaf	0	0.903042	0.519	0.261	0	FB_I	Oaf
Aspn	0	0.779585	0.493	0.235	0	FB_I	Aspn
Rhoa	0	0.857789	0.695	0.437	0	FB_I	Rhoa
Ptms	0	0.926146	0.517	0.26	0	FB_I	Ptms
Serpinf1	0	0.775899	0.505	0.248	0	FB_I	Serpinf1
Atp5h	0	0.905897	0.484	0.227	0	FB_I	Atp5h
Rhob	0	1.18652	0.465	0.208	0	FB_I	Rhob
Tubb5	0	1.07501	0.449	0.192	0	FB_I	Tubb5
Ackr3	0	1.91672	0.369	0.113	0	FB_I	Ackr3
Pdlim2	0	1.37587	0.417	0.161	0	FB_I	Pdlim2
Cox7a2	0	1.12524	0.447	0.191	0	FB_I	Cox7a2
Eif3h	0	0.899299	0.522	0.266	0	FB_I	Eif3h
Tmem59	0	0.933716	0.517	0.262	0	FB_I	Tmem59
H3f3b	0	0.753782	0.688	0.433	0	FB_I	H3f3b
S100a13	0	1.4509	0.407	0.153	0	FB_I	S100a13
Tmem50a	0	1.09046	0.482	0.228	0	FB_I	Tmem50a
Rcn3	0	0.798456	0.504	0.25	0	FB_I	Rcn3
Atp5j2	0	0.886835	0.478	0.225	0	FB_I	Atp5j2
Ramp2	0	1.25538	0.425	0.172	0	FB_I	Ramp2
Arf1	0	0.869695	0.54	0.288	0	FB_I	Arf1
Serpinb6a	0	0.966827	0.56	0.308	0	FB_I	Serpinb6a
Ahnak	0	0.706307	0.689	0.437	0	FB_I	Ahnak
Atox1	0	1.11947	0.426	0.175	0	FB_I	Atox1
Fstl1	0	0.785694	0.849	0.598	0	FB_I	Fstl1
Atp6v0c	0	1.1092	0.428	0.177	0	FB_I	Atp6v0c
Dbi	0	0.403434	0.432	0.182	0	FB_I	Dbi
Rnasek	0	1.3509	0.398	0.149	0	FB_I	Rnasek
Serping1	0	0.960329	0.781	0.532	0	FB_I	Serping1
Pcolce2	0	0.917825	0.519	0.27	0	FB_I	Pcolce2
Itm2a	0	1.2804	0.409	0.16	0	FB_I	Itm2a
Uqcr10	0	1.13329	0.425	0.177	0	FB_I	Uqcr10
Hmgn1	0	0.85271	0.461	0.214	0	FB_I	Hmgn1
Hspe1	0	1.19603	0.42	0.173	0	FB_I	Hspe1
Ltbp4	0	0.665739	0.72	0.473	0	FB_I	Ltbp4
Islr	0	1.4054	0.41	0.163	0	FB_I	Islr
Olfml3	0	1.08638	0.446	0.201	0	FB_I	Olfml3
Sfr1	0	1.17065	0.434	0.19	0	FB_I	Sfr1
Smim14	0	0.703453	0.563	0.319	0	FB_I	Smim14
Pebp1	0	0.920911	0.447	0.204	0	FB_I	Pebp1
Ndufa4	0	0.92467	0.447	0.204	0	FB_I	Ndufa4
Hspb1	0	1.40382	0.42	0.177	0	FB_I	Hspb1
Tsc22d3	0	0.932584	0.533	0.291	0	FB_I	Tsc22d3
Jun	0	1.48505	0.557	0.315	0	FB_I	Jun
Ost4	0	0.920314	0.418	0.176	0	FB_I	Ost4
Eif3k	0	1.07409	0.425	0.183	0	FB_I	Eif3k
Hsbp1	0	1.16569	0.415	0.173	0	FB_I	Hsbp1
Arhgdia	0	1.16157	0.426	0.184	0	FB_I	Arhgdia
Dad1	0	0.792371	0.458	0.217	0	FB_I	Dad1
Ostc	0	0.995484	0.431	0.19	0	FB_I	Ostc
Ndufa7	0	1.05083	0.431	0.19	0	FB_I	Ndufa7
Edf1	0	1.14988	0.412	0.171	0	FB_I	Edf1
Loxl1	0	0.489968	0.699	0.458	0	FB_I	Loxl1
Dynlrb1	0	1.20801	0.406	0.166	0	FB_I	Dynlrb1
Tpm4	0	0.764992	0.565	0.325	0	FB_I	Tpm4
Ifi27l2a	0	1.97375	0.383	0.144	0	FB_I	Ifi27l2a
Ssr4	0	0.845897	0.438	0.199	0	FB_I	Ssr4
Dpm3	0	1.13588	0.412	0.173	0	FB_I	Dpm3
Ier3ip1	0	1.0028	0.429	0.19	0	FB_I	Ier3ip1
Cnbp	0	0.789075	0.531	0.293	0	FB_I	Cnbp
Swi5	0	0.835565	0.457	0.219	0	FB_I	Swi5
Srp14	0	1.0925	0.41	0.173	0	FB_I	Srp14
Morf4l1	0	0.601465	0.664	0.428	0	FB_I	Morf4l1
Lmna	0	0.814542	0.5	0.264	0	FB_I	Lmna
Uqcc2	0	1.65095	0.363	0.127	0	FB_I	Uqcc2
Tmed10	0	0.736913	0.519	0.284	0	FB_I	Tmed10
Grcc10	0	1.10765	0.403	0.168	0	FB_I	Grcc10
Psmb1	0	0.929117	0.459	0.224	0	FB_I	Psmb1
Aldh2	0	0.779794	0.56	0.326	0	FB_I	Aldh2
Marcks	0	0.809304	0.486	0.252	0	FB_I	Marcks
Col6a2	0	0.654758	0.612	0.378	0	FB_I	Col6a2
Atp5b	0	0.950997	0.48	0.246	0	FB_I	Atp5b
Ccdc80	0	0.458378	0.733	0.499	0	FB_I	Ccdc80
Morf4l2	0	0.70888	0.532	0.299	0	FB_I	Morf4l2
Vcan	0	0.788684	0.531	0.298	0	FB_I	Vcan
Sh3bgrl3	0	1.12021	0.382	0.149	0	FB_I	Sh3bgrl3
Spcs1	0	1.0644	0.4	0.167	0	FB_I	Spcs1
Uqcrq	0	1.0361	0.404	0.171	0	FB_I	Uqcrq
Ckb	0	1.4778	0.401	0.168	0	FB_I	Ckb
Cyb5a	0	0.678185	0.616	0.383	0	FB_I	Cyb5a
Slc25a4	0	0.49456	0.568	0.335	0	FB_I	Slc25a4
Eif2s2	0	0.829378	0.497	0.265	0	FB_I	Eif2s2
Ogn	0	0.574503	0.578	0.346	0	FB_I	Ogn
Gas1	0	0.809608	0.531	0.3	0	FB_I	Gas1
Atf5	0	1.32727	0.398	0.167	0	FB_I	Atf5
Mrpl52	0	1.08312	0.398	0.167	0	FB_I	Mrpl52
Psma7	0	1.11209	0.411	0.18	0	FB_I	Psma7
Sod3	0	1.17518	0.392	0.162	0	FB_I	Sod3
Sec62	0	0.670302	0.572	0.342	0	FB_I	Sec62
Rhoc	0	1.21013	0.406	0.177	0	FB_I	Rhoc
D8Ertd738e	0	1.07322	0.404	0.175	0	FB_I	D8Ertd738e
Atp5g1	0	0.952758	0.406	0.177	0	FB_I	Atp5g1
Romo1	0	1.14746	0.39	0.161	0	FB_I	Romo1
Clic1	0	1.01281	0.439	0.21	0	FB_I	Clic1
Phlda1	0	1.42788	0.359	0.13	0	FB_I	Phlda1
Gnai2	0	0.789283	0.47	0.241	0	FB_I	Gnai2
Ldha	0	1.01537	0.408	0.18	0	FB_I	Ldha
Hnrnpk	0	0.752892	0.505	0.278	0	FB_I	Hnrnpk
Cd47	0	0.596692	0.618	0.391	0	FB_I	Cd47
Nedd8	0	0.927063	0.426	0.2	0	FB_I	Nedd8
Pabpc1	0	0.731498	0.486	0.26	0	FB_I	Pabpc1
Arl1	0	1.04543	0.417	0.192	0	FB_I	Arl1
Fhl1	0	0.635148	0.541	0.317	0	FB_I	Fhl1
Txndc5	0	0.831772	0.448	0.224	0	FB_I	Txndc5
Ppp1ca	0	1.14391	0.38	0.156	0	FB_I	Ppp1ca
Cox5b	0	0.935433	0.411	0.187	0	FB_I	Cox5b
Itm2c	0	0.951685	0.415	0.191	0	FB_I	Itm2c
Ndufv3	0	1.07169	0.396	0.173	0	FB_I	Ndufv3
Ctsz	0	0.924552	0.429	0.206	0	FB_I	Ctsz
Ahnak2	0	1.3459	0.364	0.142	0	FB_I	Ahnak2
Atp6v0e	0	0.820385	0.439	0.217	0	FB_I	Atp6v0e
Rap1a	0	0.638846	0.597	0.375	0	FB_I	Rap1a
Ndufa6	0	1.08057	0.394	0.173	0	FB_I	Ndufa6
Map1lc3a	0	1.14097	0.377	0.156	0	FB_I	Map1lc3a
Gpx1	0	1.2865	0.362	0.142	0	FB_I	Gpx1
Psmb6	0	1.23389	0.372	0.152	0	FB_I	Psmb6
Ndufb9	0	1.06989	0.39	0.171	0	FB_I	Ndufb9
Uqcr11	0	0.781592	0.421	0.202	0	FB_I	Uqcr11
Snrpb	0	1.03323	0.404	0.186	0	FB_I	Snrpb
Vwa1	0	1.42909	0.319	0.101	0	FB_I	Vwa1
Mgst1	0	0.866571	0.426	0.208	0	FB_I	Mgst1
Drap1	0	1.11674	0.384	0.166	0	FB_I	Drap1
Tmem258	0	0.934045	0.377	0.159	0	FB_I	Tmem258
Ywhaq	0	0.586466	0.571	0.353	0	FB_I	Ywhaq
Shisa5	0	0.97848	0.402	0.185	0	FB_I	Shisa5
Snrpd2	0	1.14304	0.366	0.149	0	FB_I	Snrpd2
Rbx1	0	0.793682	0.449	0.232	0	FB_I	Rbx1
Ndfip1	0	0.515821	0.645	0.429	0	FB_I	Ndfip1
Ran	0	1.2033	0.357	0.141	0	FB_I	Ran
Tmem256	0	1.08356	0.38	0.164	0	FB_I	Tmem256
Ranbp1	0	1.21049	0.361	0.145	0	FB_I	Ranbp1
Mxra8	0	0.640444	0.521	0.306	0	FB_I	Mxra8
P4hb	0	0.616305	0.42	0.205	0	FB_I	P4hb
Ndufb4	0	1.23863	0.358	0.143	0	FB_I	Ndufb4
Tprgl	0	1.13402	0.365	0.151	0	FB_I	Tprgl
Spcs2	0	0.984727	0.401	0.188	0	FB_I	Spcs2
Ifi27	0	0.779526	0.45	0.237	0	FB_I	Ifi27
Vkorc1	0	1.02237	0.366	0.153	0	FB_I	Vkorc1
Txndc17	0	1.21538	0.358	0.145	0	FB_I	Txndc17
Dap	0	0.82608	0.432	0.219	0	FB_I	Dap
Sfrp1	0	0.752351	0.416	0.203	0	FB_I	Sfrp1
Crispld2	0	0.539069	0.632	0.42	0	FB_I	Crispld2
Arl6ip5	0	0.825859	0.434	0.222	0	FB_I	Arl6ip5
Mmp14	0	0.717185	0.42	0.208	0	FB_I	Mmp14
Gm10076	0	0.761454	0.357	0.145	0	FB_I	Gm10076
Pnrc1	0	0.910297	0.412	0.2	0	FB_I	Pnrc1
Atp5k	0	0.761707	0.41	0.198	0	FB_I	Atp5k
Ubl5	0	0.948518	0.388	0.177	0	FB_I	Ubl5
Tma7	0	0.956858	0.369	0.158	0	FB_I	Tma7
Tcf21	0	1.19544	0.347	0.136	0	FB_I	Tcf21
Ly6e	0	0.829912	0.413	0.202	0	FB_I	Ly6e
Ndufb11	0	1.07033	0.373	0.163	0	FB_I	Ndufb11
Park7	0	1.00176	0.376	0.166	0	FB_I	Park7
Eif3e	0	0.779931	0.437	0.227	0	FB_I	Eif3e
Rab18	0	0.836689	0.418	0.208	0	FB_I	Rab18
Akr1a1	0	0.650091	0.462	0.253	0	FB_I	Akr1a1
Nop10	0	1.14554	0.352	0.143	0	FB_I	Nop10
Chmp2a	0	1.1689	0.352	0.143	0	FB_I	Chmp2a
Calm3	0	1.07654	0.37	0.161	0	FB_I	Calm3
Tbca	0	0.781613	0.439	0.23	0	FB_I	Tbca
Arf5	0	1.00395	0.404	0.197	0	FB_I	Arf5
Atp5d	0	0.885302	0.386	0.179	0	FB_I	Atp5d
Eif4a1	0	0.736857	0.498	0.291	0	FB_I	Eif4a1
Oat	0	1.08272	0.363	0.156	0	FB_I	Oat
Fkbp2	0	1.26726	0.348	0.141	0	FB_I	Fkbp2
Selenbp1	0	0.836423	0.408	0.201	0	FB_I	Selenbp1
Phlda3	0	1.38569	0.329	0.123	0	FB_I	Phlda3
Capg	0	1.54144	0.323	0.117	0	FB_I	Capg
Cyba	0	0.98085	0.379	0.173	0	FB_I	Cyba
Slc29a1	0	0.988082	0.389	0.183	0	FB_I	Slc29a1
Ywhab	0	0.819931	0.426	0.22	0	FB_I	Ywhab
Bag1	0	1.20783	0.349	0.143	0	FB_I	Bag1
Mt1	0	1.48802	0.421	0.215	0	FB_I	Mt1
Clta	0	0.868248	0.409	0.203	0	FB_I	Clta
Serbp1	0	0.636503	0.472	0.266	0	FB_I	Serbp1
Ywhae	0	0.522088	0.604	0.398	0	FB_I	Ywhae
Arpc2	0	0.630169	0.519	0.314	0	FB_I	Arpc2
Atp6v1f	0	1.22624	0.338	0.133	0	FB_I	Atp6v1f
Ywhah	0	1.21268	0.367	0.162	0	FB_I	Ywhah
Ptges3	0	0.773278	0.433	0.229	0	FB_I	Ptges3
Atp5g2	0	0.872887	0.375	0.172	0	FB_I	Atp5g2
Ugdh	0	1.81076	0.372	0.169	0	FB_I	Ugdh
Pomp	0	1.11993	0.352	0.149	0	FB_I	Pomp
Lsp1	0	0.556638	0.552	0.35	0	FB_I	Lsp1
Nfic	0	0.687354	0.455	0.253	0	FB_I	Nfic
Prr13	0	1.38937	0.329	0.127	0	FB_I	Prr13
Cdk2ap2	0	1.45236	0.311	0.109	0	FB_I	Cdk2ap2
Ctsd	0	0.712588	0.393	0.192	0	FB_I	Ctsd
Pkm	0	0.813877	0.396	0.196	0	FB_I	Pkm
Canx	0	0.63853	0.452	0.252	0	FB_I	Canx
Ndufa11	0	1.12171	0.347	0.147	0	FB_I	Ndufa11
Tubb6	0	1.36296	0.322	0.123	0	FB_I	Tubb6
Srp9	0	0.98366	0.356	0.157	0	FB_I	Srp9
Atp5f1	0	0.864876	0.391	0.193	0	FB_I	Atp5f1
Use1	0	1.05409	0.346	0.148	0	FB_I	Use1
Dnajb11	0	1.10971	0.351	0.153	0	FB_I	Dnajb11
Rpn2	0	0.803718	0.403	0.206	0	FB_I	Rpn2
Efhd1	0	3.0984	0.224	0.027	0	FB_I	Efhd1
Rexo2	0	0.917238	0.387	0.19	0	FB_I	Rexo2
Ndufc2	0	1.08407	0.346	0.149	0	FB_I	Ndufc2
Xbp1	0	0.81261	0.423	0.226	0	FB_I	Xbp1
Ap2m1	0	1.05436	0.35	0.153	0	FB_I	Ap2m1
Ppp1r14b	0	1.8184	0.288	0.091	0	FB_I	Ppp1r14b
Actb	0	0.873055	0.738	0.541	0	FB_I	Actb
1810037I17Rik	0	1.11592	0.337	0.141	0	FB_I	1810037I17Rik
Npas2	0	0.640509	0.387	0.191	0	FB_I	Npas2
Atp5c1	0	0.728817	0.425	0.229	0	FB_I	Atp5c1
Ndufa3	0	1.02831	0.352	0.156	0	FB_I	Ndufa3
Sar1a	0	0.764225	0.408	0.212	0	FB_I	Sar1a
Rac1	0	0.598902	0.476	0.28	0	FB_I	Rac1
Dnaja1	0	0.953906	0.433	0.238	0	FB_I	Dnaja1
Ndufs5	0	0.765491	0.387	0.192	0	FB_I	Ndufs5
Ssr2	0	0.774323	0.355	0.16	0	FB_I	Ssr2
Psma2	0	1.05954	0.349	0.154	0	FB_I	Psma2
Anp32b	0	0.833554	0.379	0.185	0	FB_I	Anp32b
St13	0	0.671928	0.437	0.243	0	FB_I	St13
Tmbim6	0	0.664277	0.442	0.248	0	FB_I	Tmbim6
Ctbp1	0	0.973461	0.358	0.164	0	FB_I	Ctbp1
Gpx8	0	0.915611	0.352	0.158	0	FB_I	Gpx8
Tram1	0	0.693075	0.428	0.235	0	FB_I	Tram1
Rer1	0	0.970053	0.363	0.17	0	FB_I	Rer1
Gnas	0	0.540364	0.768	0.576	0	FB_I	Gnas
Med28	0	1.23683	0.323	0.131	0	FB_I	Med28
mt-Nd3	0	0.861507	0.364	0.172	0	FB_I	mt-Nd3
Psmb3	0	1.05104	0.346	0.154	0	FB_I	Psmb3
Carhsp1	0	1.59043	0.284	0.092	0	FB_I	Carhsp1
Gsn	0	1.28025	0.924	0.733	0	FB_I	Gsn
H2afz	0	0.769842	0.332	0.141	0	FB_I	H2afz
Glis3	0	-1.59852	0.199	0.39	0	FB_I	Glis3
Serp1	0	0.943118	0.346	0.155	0	FB_I	Serp1
Ift20	0	0.914485	0.359	0.168	0	FB_I	Ift20
Pcbp1	0	1.13857	0.332	0.142	0	FB_I	Pcbp1
Tnik	0	-1.54194	0.304	0.494	0	FB_I	Tnik
Cox7b	0	0.935463	0.358	0.168	0	FB_I	Cox7b
Ddost	0	1.04958	0.335	0.146	0	FB_I	Ddost
Gas7	0	0.787344	0.394	0.205	0	FB_I	Gas7
Angpt1	0	-1.66339	0.209	0.398	0	FB_I	Angpt1
Sri	0	0.802455	0.387	0.198	0	FB_I	Sri
Kdelr1	0	0.760065	0.386	0.197	0	FB_I	Kdelr1
Nap1l1	0	0.765145	0.389	0.2	0	FB_I	Nap1l1
Cope	0	0.842855	0.38	0.191	0	FB_I	Cope
Dusp1	0	0.962623	0.531	0.342	0	FB_I	Dusp1
Ergic3	0	0.92584	0.353	0.164	0	FB_I	Ergic3
Psenen	0	1.0891	0.329	0.141	0	FB_I	Psenen
Fcgrt	0	0.729738	0.398	0.21	0	FB_I	Fcgrt
G0s2	0	0.9784	0.365	0.177	0	FB_I	G0s2
Tm2d2	0	1.18602	0.321	0.133	0	FB_I	Tm2d2
Zfp385a	0	1.83648	0.25	0.062	0	FB_I	Zfp385a
Ccbe1	0	-1.63149	0.229	0.417	0	FB_I	Ccbe1
Ndufc1	0	1.08578	0.328	0.141	0	FB_I	Ndufc1
Brk1	0	0.85923	0.37	0.183	0	FB_I	Brk1
Smoc2	0	0.491872	0.78	0.594	0	FB_I	Smoc2
Fundc2	0	0.999458	0.335	0.149	0	FB_I	Fundc2
Kdelr2	0	0.638834	0.393	0.207	0	FB_I	Kdelr2
Tbrg1	0	0.841324	0.372	0.186	0	FB_I	Tbrg1
Prdx2	0	0.844075	0.353	0.167	0	FB_I	Prdx2
Glo1	0	1.04732	0.327	0.142	0	FB_I	Glo1
Fos	0	1.41562	0.491	0.306	0	FB_I	Fos
Serpina3n	0	1.16084	0.304	0.119	0	FB_I	Serpina3n
Eif5	0	0.706926	0.42	0.235	0	FB_I	Eif5
Bmper	0	-1.34694	0.353	0.537	0	FB_I	Bmper
Pgf	0	1.44556	0.274	0.09	0	FB_I	Pgf
Arpc5	0	0.859629	0.364	0.18	0	FB_I	Arpc5
Psma4	0	1.10532	0.324	0.14	0	FB_I	Psma4
Tspan3	0	0.778548	0.365	0.181	0	FB_I	Tspan3
Cdkn1a	0	1.63623	0.281	0.098	0	FB_I	Cdkn1a
Ndufb10	0	1.0866	0.323	0.14	0	FB_I	Ndufb10
Ndufa5	0	0.851671	0.346	0.163	0	FB_I	Ndufa5
Pea15a	0	0.755717	0.382	0.2	0	FB_I	Pea15a
Tmem234	0	0.638829	0.411	0.229	0	FB_I	Tmem234
Mrpl33	0	0.639545	0.406	0.225	0	FB_I	Mrpl33
Pttg1ip	0	1.07049	0.322	0.141	0	FB_I	Pttg1ip
Smim7	0	0.964401	0.333	0.152	0	FB_I	Smim7
1110004F10Rik	0	0.793932	0.367	0.186	0	FB_I	1110004F10Rik
Fxyd6	0	0.52672	0.358	0.177	0	FB_I	Fxyd6
Cd248	0	2.45115	0.229	0.048	0	FB_I	Cd248
Cnpy2	0	0.768906	0.345	0.164	0	FB_I	Cnpy2
Tmco1	0	0.930313	0.343	0.163	0	FB_I	Tmco1
Arpc3	0	0.662846	0.406	0.226	0	FB_I	Arpc3
Sptssa	0	0.897567	0.343	0.163	0	FB_I	Sptssa
Snrpe	0	1.01487	0.32	0.14	0	FB_I	Snrpe
Ndufb5	0	1.04532	0.319	0.139	0	FB_I	Ndufb5
Prdx5	0	0.877669	0.331	0.152	0	FB_I	Prdx5
Slc25a5	0	1.12842	0.297	0.118	0	FB_I	Slc25a5
Cltb	0	1.18997	0.306	0.127	0	FB_I	Cltb
Prkg1	0	-1.28523	0.52	0.699	0	FB_I	Prkg1
Emc10	0	0.929133	0.327	0.149	0	FB_I	Emc10
Sema3c	0	2.26003	0.253	0.075	0	FB_I	Sema3c
Hdgf	0	0.865233	0.331	0.154	0	FB_I	Hdgf
Scand1	0	1.03472	0.312	0.135	0	FB_I	Scand1
Snrpf	0	1.0819	0.315	0.138	0	FB_I	Snrpf
Atxn7l3b	0	0.720051	0.366	0.189	0	FB_I	Atxn7l3b
Slit3	0	-1.37011	0.401	0.578	0	FB_I	Slit3
Sgcd	0	-1.44155	0.542	0.719	0	FB_I	Sgcd
Gabarapl2	0	0.986073	0.322	0.146	0	FB_I	Gabarapl2
Cct5	0	0.998553	0.322	0.146	0	FB_I	Cct5
Ndufb8	0	0.88944	0.323	0.147	0	FB_I	Ndufb8
Timm13	0	1.15373	0.297	0.121	0	FB_I	Timm13
Vat1	0	1.25772	0.291	0.115	0	FB_I	Vat1
Gng11	0	0.894373	0.338	0.163	0	FB_I	Gng11
Ubxn1	0	1.11859	0.299	0.124	0	FB_I	Ubxn1
Anapc11	0	0.834118	0.345	0.17	0	FB_I	Anapc11
Mfge8	0	0.915304	0.318	0.144	0	FB_I	Mfge8
Prnp	0	0.999437	0.301	0.127	0	FB_I	Prnp
Higd1a	0	1.13279	0.298	0.124	0	FB_I	Higd1a
Tnfaip2	0	1.21225	0.287	0.113	0	FB_I	Tnfaip2
Mgp	0	0.480749	0.726	0.552	0	FB_I	Mgp
Glipr2	0	0.69138	0.35	0.177	0	FB_I	Glipr2
Sdf4	0	0.663646	0.374	0.201	0	FB_I	Sdf4
2610001J05Rik	0	1.05559	0.306	0.133	0	FB_I	2610001J05Rik
Snrnp27	0	1.12187	0.301	0.128	0	FB_I	Snrnp27
Zfp706	0	1.01182	0.311	0.138	0	FB_I	Zfp706
Fxyd5	0	1.39339	0.28	0.108	0	FB_I	Fxyd5
9530068E07Rik	0	0.94889	0.319	0.147	0	FB_I	9530068E07Rik
Sdf2l1	0	1.67993	0.258	0.086	0	FB_I	Sdf2l1
Lamtor5	0	1.11564	0.305	0.133	0	FB_I	Lamtor5
Sdk1	0	1.09571	0.345	0.173	0	FB_I	Sdk1
Sub1	0	0.809175	0.341	0.17	0	FB_I	Sub1
Mydgf	0	0.939016	0.314	0.143	0	FB_I	Mydgf
Junb	0	1.17924	0.619	0.448	0	FB_I	Junb
Cetn3	0	1.03004	0.31	0.139	0	FB_I	Cetn3
Atpif1	0	0.728807	0.342	0.172	0	FB_I	Atpif1
Atraid	0	0.843936	0.332	0.162	0	FB_I	Atraid
C3	0	0.629369	0.358	0.188	0	FB_I	C3
Gda	0	1.06326	0.303	0.133	0	FB_I	Gda
Mrps21	0	0.929832	0.314	0.145	0	FB_I	Mrps21
Gm2000	0	1.21956	0.286	0.117	0	FB_I	Gm2000
Raly	0	1.05365	0.3	0.131	0	FB_I	Raly
Dbn1	0	1.21783	0.29	0.121	0	FB_I	Dbn1
Tax1bp3	0	1.23806	0.28	0.112	0	FB_I	Tax1bp3
Iscu	0	1.02904	0.304	0.136	0	FB_I	Iscu
Capza2	0	0.695863	0.366	0.198	0	FB_I	Capza2
Cycs	0	1.28275	0.279	0.112	0	FB_I	Cycs
Nme1	0	1.07553	0.279	0.112	0	FB_I	Nme1
Ndufs7	0	0.859708	0.312	0.145	0	FB_I	Ndufs7
Loxl2	0	0.871794	0.308	0.141	0	FB_I	Loxl2
Fam32a	0	1.14298	0.285	0.118	0	FB_I	Fam32a
Psmd7	0	0.732701	0.343	0.177	0	FB_I	Psmd7
Polr2f	0	1.02089	0.297	0.131	0	FB_I	Polr2f
Tomm20	0	0.93912	0.307	0.142	0	FB_I	Tomm20
Cdc37	0	0.857393	0.311	0.146	0	FB_I	Cdc37
Mlf2	0	0.966403	0.299	0.134	0	FB_I	Mlf2
Pdcd5	0	1.0009	0.295	0.13	0	FB_I	Pdcd5
Anapc13	0	1.07043	0.286	0.121	0	FB_I	Anapc13
Ndufs6	0	0.961007	0.3	0.135	0	FB_I	Ndufs6
Cox14	0	1.10833	0.287	0.122	0	FB_I	Cox14
Cox17	0	1.00774	0.295	0.13	0	FB_I	Cox17
Polr1d	0	0.843778	0.316	0.152	0	FB_I	Polr1d
Stub1	0	0.762645	0.334	0.17	0	FB_I	Stub1
Leprot	0	1.00239	0.296	0.132	0	FB_I	Leprot
Eva1b	0	0.747068	0.325	0.162	0	FB_I	Eva1b
Ndn	0	1.28502	0.262	0.099	0	FB_I	Ndn
Bcl7c	0	0.770001	0.322	0.159	0	FB_I	Bcl7c
Nsa2	0	0.943697	0.305	0.142	0	FB_I	Nsa2
Qpct	0	1.23614	0.26	0.097	0	FB_I	Qpct
Eif3i	0	1.01255	0.293	0.13	0	FB_I	Eif3i
Pdap1	0	1.02165	0.292	0.129	0	FB_I	Pdap1
Socs3	0	2.22681	0.24	0.077	0	FB_I	Socs3
Psmb5	0	1.12449	0.279	0.117	0	FB_I	Psmb5
Negr1	0	-1.26865	0.438	0.6	0	FB_I	Negr1
Rnf7	0	0.911547	0.299	0.137	0	FB_I	Rnf7
Fis1	0	0.768093	0.335	0.174	0	FB_I	Fis1
Rnh1	0	0.846012	0.316	0.155	0	FB_I	Rnh1
Arpp19	0	0.790443	0.323	0.162	0	FB_I	Arpp19
Emc7	0	0.94168	0.299	0.138	0	FB_I	Emc7
Ppdpf	0	1.12933	0.273	0.113	0	FB_I	Ppdpf
Vps29	0	0.880846	0.312	0.152	0	FB_I	Vps29
Degs1	0	0.939376	0.291	0.131	0	FB_I	Degs1
Mrpl23	0	0.987339	0.287	0.127	0	FB_I	Mrpl23
Cd164	0	1.06159	0.282	0.122	0	FB_I	Cd164
Mrps24	0	0.924895	0.293	0.134	0	FB_I	Mrps24
Bax	0	1.09895	0.281	0.123	0	FB_I	Bax
Rpn1	0	0.883361	0.308	0.15	0	FB_I	Rpn1
Psmc3	0	1.05732	0.284	0.126	0	FB_I	Psmc3
Tceal8	0	0.935782	0.298	0.14	0	FB_I	Tceal8
Psmb4	0	1.02634	0.283	0.125	0	FB_I	Psmb4
Mrps14	0	1.14379	0.271	0.114	0	FB_I	Mrps14
Tomm5	0	1.1575	0.266	0.109	0	FB_I	Tomm5
Smim11	0	1.06449	0.273	0.116	0	FB_I	Smim11
Atp6ap1	0	0.802226	0.308	0.151	0	FB_I	Atp6ap1
Ndufa1	0	0.938212	0.288	0.131	0	FB_I	Ndufa1
Pdia4	0	0.933231	0.296	0.139	0	FB_I	Pdia4
Rwdd1	0	1.00387	0.289	0.132	0	FB_I	Rwdd1
Mif	0	0.728525	0.292	0.135	0	FB_I	Mif
Cd151	0	1.06791	0.271	0.115	0	FB_I	Cd151
Eif1b	0	1.09739	0.276	0.12	0	FB_I	Eif1b
Cyb5r3	0	1.18887	0.268	0.112	0	FB_I	Cyb5r3
Cuta	0	1.03282	0.274	0.118	0	FB_I	Cuta
Gstp1	0	1.40374	0.258	0.102	0	FB_I	Gstp1
Pgam1	0	1.04846	0.276	0.12	0	FB_I	Pgam1
Set	0	0.840331	0.306	0.15	0	FB_I	Set
Smim10l1	0	0.929302	0.292	0.136	0	FB_I	Smim10l1
Rnaset2a	0	1.42545	0.238	0.082	0	FB_I	Rnaset2a
Lamtor2	0	1.04413	0.275	0.12	0	FB_I	Lamtor2
Tbcb	0	1.07777	0.274	0.119	0	FB_I	Tbcb
C1d	0	0.921176	0.294	0.139	0	FB_I	C1d
H2afj	0	0.77106	0.306	0.152	0	FB_I	H2afj
Sra1	0	0.831193	0.313	0.159	0	FB_I	Sra1
Polr2m	0	0.929926	0.286	0.132	0	FB_I	Polr2m
Mrpl30	0	1.14184	0.264	0.111	0	FB_I	Mrpl30
Eif3g	0	1.13729	0.264	0.111	0	FB_I	Eif3g
Pfdn2	0	0.901952	0.284	0.131	0	FB_I	Pfdn2
Hcfc1r1	0	0.868662	0.287	0.134	0	FB_I	Hcfc1r1
Rbm8a	0	1.07588	0.271	0.119	0	FB_I	Rbm8a
Coa3	0	1.18058	0.258	0.106	0	FB_I	Coa3
Tomm22	0	1.13446	0.257	0.105	0	FB_I	Tomm22
Auts2	0	-1.26454	0.637	0.788	0	FB_I	Auts2
Bola2	0	1.10246	0.261	0.11	0	FB_I	Bola2
Tubb2a	0	1.081	0.271	0.12	0	FB_I	Tubb2a
BC031181	0	0.798302	0.295	0.144	0	FB_I	BC031181
Gpx7	0	0.74993	0.284	0.133	0	FB_I	Gpx7
Arl6ip1	0	0.872303	0.285	0.134	0	FB_I	Arl6ip1
Cnih1	0	0.982388	0.272	0.123	0	FB_I	Cnih1
Adprh	0	1.07561	0.258	0.109	0	FB_I	Adprh
Htra3	0	0.666465	0.844	0.696	0	FB_I	Htra3
Sf3b5	0	0.908255	0.274	0.126	0	FB_I	Sf3b5
Mrps33	0	1.03002	0.266	0.119	0	FB_I	Mrps33
Mgat2	0	1.13723	0.253	0.106	0	FB_I	Mgat2
Cdc42ep2	0	1.26065	0.224	0.077	0	FB_I	Cdc42ep2
Rnf187	0	0.849981	0.284	0.137	0	FB_I	Rnf187
Cstb	0	0.930427	0.272	0.126	0	FB_I	Cstb
Trmt112	0	1.10409	0.253	0.107	0	FB_I	Trmt112
Ube2s	0	0.815054	0.288	0.142	0	FB_I	Ube2s
Dpyd	0	-1.9818	0.111	0.256	0	FB_I	Dpyd
Ndufb6	0	1.24551	0.248	0.103	0	FB_I	Ndufb6
Emg1	0	0.935433	0.266	0.121	0	FB_I	Emg1
Mbd3	0	1.05946	0.256	0.111	0	FB_I	Mbd3
Sap18	0	0.960639	0.272	0.127	0	FB_I	Sap18
Ttn	0	-1.7826	0.097	0.242	0	FB_I	Ttn
Creld2	0	1.2839	0.242	0.097	0	FB_I	Creld2
Ggh	0	1.03798	0.253	0.109	0	FB_I	Ggh
Tex261	0	0.914221	0.261	0.117	0	FB_I	Tex261
Mien1	0	1.44401	0.234	0.09	0	FB_I	Mien1
Prelid1	0	0.969122	0.256	0.112	0	FB_I	Prelid1
Bloc1s1	0	1.2177	0.24	0.096	0	FB_I	Bloc1s1
Chmp5	0	0.970317	0.265	0.122	0	FB_I	Chmp5
Fkbp4	0	1.07357	0.252	0.109	0	FB_I	Fkbp4
Mrvi1	0	-2.62828	0.044	0.187	0	FB_I	Mrvi1
Nudc	0	0.972904	0.261	0.119	0	FB_I	Nudc
Rras	0	1.09813	0.238	0.096	0	FB_I	Rras
Tmem14c	0	1.08435	0.249	0.108	0	FB_I	Tmem14c
Dctn3	0	1.09823	0.241	0.1	0	FB_I	Dctn3
Chpf	0	1.05637	0.244	0.105	0	FB_I	Chpf
Ndufa4l2	0	1.07961	0.239	0.1	0	FB_I	Ndufa4l2
Syf2	0	0.975884	0.245	0.107	0	FB_I	Syf2
Ap2s1	0	0.883148	0.259	0.121	0	FB_I	Ap2s1
Tmem100	0	2.18239	0.189	0.051	0	FB_I	Tmem100
Cldnd1	0	0.975121	0.248	0.11	0	FB_I	Cldnd1
Tmem109	0	0.983367	0.244	0.106	0	FB_I	Tmem109
Kcnip1	0	-3.18327	0.037	0.175	0	FB_I	Kcnip1
Chrac1	0	1.10327	0.235	0.097	0	FB_I	Chrac1
Prex2	0	-1.15871	0.504	0.64	0	FB_I	Prex2
Spon1	0	-1.38148	0.355	0.491	0	FB_I	Spon1
Ccdc124	0	1.2491	0.225	0.089	0	FB_I	Ccdc124
Rbfox1	0	-1.99142	0.109	0.245	0	FB_I	Rbfox1
Dnajb9	0	1.07013	0.237	0.101	0	FB_I	Dnajb9
Thbd	0	1.71244	0.187	0.052	0	FB_I	Thbd
Ube2v1	0	1.07662	0.234	0.099	0	FB_I	Ube2v1
Eno1	0	1.00987	0.236	0.102	0	FB_I	Eno1
Impdh2	0	1.08468	0.236	0.102	0	FB_I	Impdh2
Gphn	0	-0.915925	0.553	0.687	0	FB_I	Gphn
Banf1	0	1.13342	0.226	0.092	0	FB_I	Banf1
Blvrb	0	0.991691	0.241	0.108	0	FB_I	Blvrb
Yif1a	0	1.09159	0.228	0.095	0	FB_I	Yif1a
Higd2a	0	1.15683	0.226	0.095	0	FB_I	Higd2a
Hs3st1	0	1.2105	0.197	0.067	0	FB_I	Hs3st1
Mt2	0	1.43305	0.246	0.116	0	FB_I	Mt2
Itgbl1	0	-1.23594	0.397	0.527	0	FB_I	Itgbl1
9530026P05Rik	0	-1.49119	0.225	0.355	0	FB_I	9530026P05Rik
Taldo1	0	1.02165	0.228	0.099	0	FB_I	Taldo1
Ly6c1	0	2.07437	0.175	0.046	0	FB_I	Ly6c1
Svil	0	-1.08408	0.425	0.553	0	FB_I	Svil
Igfbp7	0	0.622326	0.841	0.713	0	FB_I	Igfbp7
Gm8797	0	1.57168	0.181	0.057	0	FB_I	Gm8797
Ror1	0	-1.04868	0.551	0.673	0	FB_I	Ror1
Hspa1a	0	1.29293	0.209	0.087	0	FB_I	Hspa1a
Lncpint	0	-0.89877	0.555	0.674	0	FB_I	Lncpint
Ret	0	1.51726	0.175	0.056	0	FB_I	Ret
Myh6	0	-1.74485	0.084	0.202	0	FB_I	Myh6
Rgs7	0	-2.88174	0.041	0.158	0	FB_I	Rgs7
Lrrn4cl	0	2.63597	0.131	0.017	0	FB_I	Lrrn4cl
Arhgap24	0	-1.21331	0.597	0.711	0	FB_I	Arhgap24
Mecom	0	-0.987899	0.691	0.804	0	FB_I	Mecom
Ryr2	0	-1.91255	0.074	0.186	0	FB_I	Ryr2
Arhgap6	0	-1.04997	0.559	0.671	0	FB_I	Arhgap6
Ctnna3	0	-1.95883	0.073	0.184	0	FB_I	Ctnna3
Gulp1	0	-0.942606	0.53	0.641	0	FB_I	Gulp1
Elmo1	0	-0.912952	0.5	0.61	0	FB_I	Elmo1
Emilin2	0	1.70701	0.147	0.039	0	FB_I	Emilin2
Htra4	0	1.80441	0.151	0.044	0	FB_I	Htra4
Cdk8	0	-0.957523	0.539	0.645	0	FB_I	Cdk8
B3gnt8	0	1.4559	0.146	0.044	0	FB_I	B3gnt8
Thsd7a	0	-1.19043	0.565	0.664	0	FB_I	Thsd7a
Gadd45a	0	1.75381	0.135	0.036	0	FB_I	Gadd45a
Gm42418	0	-1.16172	0.675	0.774	0	FB_I	Gm42418
Itpr1	0	-1.06245	0.563	0.656	0	FB_I	Itpr1
Tnnt2	0	-1.74253	0.065	0.158	0	FB_I	Tnnt2
Dpp4	0	2.44523	0.114	0.021	0	FB_I	Dpp4
Rbpms	0	-1.13499	0.476	0.569	0	FB_I	Rbpms
Ssh2	0	-1.08083	0.592	0.684	0	FB_I	Ssh2
Pid1	0	-1.03748	0.594	0.685	0	FB_I	Pid1
Dcn	0	1.03935	0.932	0.843	0	FB_I	Dcn
Esrrg	0	-2.33121	0.046	0.127	0	FB_I	Esrrg
Atrnl1	0	-0.874669	0.638	0.719	0	FB_I	Atrnl1
Pbx1	0	-0.826789	0.652	0.731	0	FB_I	Pbx1
Ank2	0	-0.923154	0.68	0.754	0	FB_I	Ank2
Cadm3	0	2.97008	0.08	0.009	0	FB_I	Cadm3
Dlc1	0	-1.17796	0.803	0.873	0	FB_I	Dlc1
Myl2	0	-1.64372	0.046	0.111	0	FB_I	Myl2
Pcdh9	0	-1.01033	0.776	0.839	0	FB_I	Pcdh9
Gpc6	0	-1.13853	0.844	0.903	0	FB_I	Gpc6
Sox5	0	-0.561576	0.753	0.811	0	FB_I	Sox5
Zfpm2	0	-0.618775	0.772	0.819	0	FB_I	Zfpm2
Bicc1	0	-1.11177	0.858	0.899	0	FB_I	Bicc1
Ghr	0	-0.697652	0.801	0.828	0	FB_I	Ghr
Lama2	0	-0.578154	0.944	0.921	0	FB_I	Lama2
Celf2	0	-0.566394	0.961	0.939	0	FB_I	Celf2
Mast4	0	-0.828165	0.891	0.909	0	FB_I	Mast4
Nfib	0	-0.728266	0.815	0.832	0	FB_I	Nfib
Rora	0	-1.08285	0.929	0.945	0	FB_I	Rora
Nfia	0	-0.812486	0.907	0.922	0	FB_I	Nfia
Zbtb20	0	-0.514407	0.985	0.971	0	FB_I	Zbtb20
Rbms3	0	-0.531766	0.924	0.916	0	FB_I	Rbms3
Tcf4	0	-0.598517	0.886	0.88	0	FB_I	Tcf4
Airn	0	-0.766371	0.842	0.84	0	FB_I	Airn
Abca8a	0	-0.747044	0.855	0.856	0	FB_I	Abca8a
Plxdc2	0	-0.707202	0.827	0.827	0	FB_I	Plxdc2
Ndufb2	6.73989e-308	0.793169	0.314	0.15	1.33227e-303	FB_I	Ndufb2
Bnip3l	1.89195e-307	0.749335	0.341	0.177	3.73981e-303	FB_I	Bnip3l
Naa38	3.22031e-307	1.13982	0.216	0.092	6.36559e-303	FB_I	Naa38
Plin3	4.20794e-307	0.855759	0.272	0.125	8.31784e-303	FB_I	Plin3
Ginm1	8.69254e-307	0.945247	0.266	0.121	1.71825e-302	FB_I	Ginm1
Prss23	1.47376e-306	1.00672	0.22	0.092	2.91318e-302	FB_I	Prss23
Mid1	7.09112e-306	-1.03011	0.472	0.586	1.4017e-301	FB_I	Mid1
1700019D03Rik	1.16543e-305	1.42032	0.139	0.04	2.30371e-301	FB_I	1700019D03Rik
Vdac3	2.60139e-305	0.77866	0.326	0.166	5.14217e-301	FB_I	Vdac3
Mpc2	7.60004e-305	0.760833	0.345	0.172	1.5023e-300	FB_I	Mpc2
Slirp	1.01255e-304	0.967087	0.249	0.114	2.00151e-300	FB_I	Slirp
Myl3	1.41236e-304	-1.6893	0.043	0.103	2.7918e-300	FB_I	Myl3
Cct7	2.33945e-304	0.946185	0.258	0.12	4.62439e-300	FB_I	Cct7
Yipf4	1.86048e-303	0.76627	0.306	0.151	3.67761e-299	FB_I	Yipf4
Ufm1	1.77127e-302	0.995074	0.227	0.1	3.50127e-298	FB_I	Ufm1
Ndufab1	8.61215e-302	0.927155	0.289	0.132	1.70236e-297	FB_I	Ndufab1
Diaph2	3.63612e-301	-0.783961	0.54	0.638	7.18752e-297	FB_I	Diaph2
Smpdl3a	9.88354e-301	0.961358	0.237	0.103	1.95368e-296	FB_I	Smpdl3a
Gpsm3	1.17937e-300	1.34769	0.16	0.054	2.33126e-296	FB_I	Gpsm3
Scn1b	1.83923e-300	1.06093	0.234	0.102	3.63561e-296	FB_I	Scn1b
Reep5	1.95121e-300	0.614686	0.386	0.208	3.85696e-296	FB_I	Reep5
Tgm2	2.32209e-300	1.12021	0.195	0.074	4.59007e-296	FB_I	Tgm2
Cct4	8.6298e-300	0.722549	0.334	0.174	1.70585e-295	FB_I	Cct4
Pqlc3	1.3485e-299	1.19046	0.18	0.065	2.66558e-295	FB_I	Pqlc3
Gemin7	1.42294e-299	1.07456	0.232	0.104	2.81272e-295	FB_I	Gemin7
Hnrnpf	6.94507e-298	0.592997	0.457	0.274	1.37283e-293	FB_I	Hnrnpf
Tapbp	6.97832e-298	0.671682	0.346	0.183	1.3794e-293	FB_I	Tapbp
Cacybp	8.51753e-298	1.1748	0.197	0.08	1.68366e-293	FB_I	Cacybp
Tnfaip6	5.27645e-297	1.59022	0.254	0.119	1.043e-292	FB_I	Tnfaip6
Tmem160	7.10867e-297	1.02087	0.235	0.101	1.40517e-292	FB_I	Tmem160
Slco3a1	8.65614e-297	0.737649	0.458	0.265	1.71106e-292	FB_I	Slco3a1
P2ry1	9.15591e-297	1.48439	0.133	0.038	1.80985e-292	FB_I	P2ry1
Gm11808	2.50934e-296	1.1678	0.22	0.095	4.96022e-292	FB_I	Gm11808
Arf4	7.09157e-296	0.452215	0.647	0.44	1.40179e-291	FB_I	Arf4
Pdcd6	1.46087e-295	0.814734	0.285	0.141	2.8877e-291	FB_I	Pdcd6
Mrps16	1.71582e-295	0.995385	0.228	0.1	3.39167e-291	FB_I	Mrps16
Cyr61	1.84687e-295	-1.79707	0.07	0.203	3.65071e-291	FB_I	Cyr61
Snx3	1.87821e-295	0.584844	0.422	0.243	3.71266e-291	FB_I	Snx3
Fkbp7	2.77371e-295	0.701544	0.333	0.174	5.48278e-291	FB_I	Fkbp7
Mdh2	3.75076e-295	0.775872	0.335	0.165	7.41413e-291	FB_I	Mdh2
Akt3	3.76078e-295	-0.752636	0.502	0.617	7.43394e-291	FB_I	Akt3
Foxp2	8.46251e-295	-0.741322	0.541	0.652	1.67278e-290	FB_I	Foxp2
Hexa	5.37262e-294	0.73027	0.317	0.166	1.06201e-289	FB_I	Hexa
Aebp1	6.17347e-294	0.628368	0.382	0.209	1.22031e-289	FB_I	Aebp1
Has2	1.98321e-293	2.24989	0.108	0.025	3.9202e-289	FB_I	Has2
Ppic	2.17426e-293	0.676495	0.325	0.167	4.29785e-289	FB_I	Ppic
Myadm	1.71094e-292	0.716189	0.352	0.19	3.38202e-288	FB_I	Myadm
Svep1	2.95107e-292	-1.44166	0.288	0.423	5.83338e-288	FB_I	Svep1
Igf1r	3.52355e-291	-0.835298	0.496	0.603	6.96501e-287	FB_I	Igf1r
Lims2	5.73264e-291	0.716969	0.298	0.145	1.13317e-286	FB_I	Lims2
Psme2	1.03692e-290	0.968445	0.235	0.108	2.04969e-286	FB_I	Psme2
Lsm4	1.32529e-290	0.96802	0.231	0.105	2.61971e-286	FB_I	Lsm4
Skp1a	6.21632e-290	0.755411	0.304	0.155	1.22878e-285	FB_I	Skp1a
Ehbp1	1.64106e-289	-0.951476	0.39	0.502	3.24388e-285	FB_I	Ehbp1
Hnrnpab	1.68302e-289	0.859939	0.264	0.124	3.32684e-285	FB_I	Hnrnpab
Fuca1	4.76734e-289	0.767432	0.306	0.157	9.42359e-285	FB_I	Fuca1
Dpep1	1.66333e-288	0.349681	0.613	0.407	3.2879e-284	FB_I	Dpep1
Lman2	5.96495e-288	0.795024	0.275	0.133	1.17909e-283	FB_I	Lman2
Tsen34	6.87896e-288	0.755014	0.291	0.145	1.35976e-283	FB_I	Tsen34
Setbp1	1.21891e-287	-0.811608	0.527	0.629	2.40942e-283	FB_I	Setbp1
Tnfsf12	1.28079e-287	0.846237	0.25	0.115	2.53173e-283	FB_I	Tnfsf12
Psmc5	2.43091e-287	1.03814	0.22	0.095	4.80518e-283	FB_I	Psmc5
Arntl	7.5297e-287	0.63696	0.31	0.155	1.4884e-282	FB_I	Arntl
Ndufs2	1.00528e-285	0.980527	0.282	0.131	1.98713e-281	FB_I	Ndufs2
Smim15	6.72389e-285	1.08016	0.215	0.094	1.32911e-280	FB_I	Smim15
Tmed7	6.86045e-285	0.793013	0.275	0.134	1.35611e-280	FB_I	Tmed7
Elovl1	9.2099e-285	0.985639	0.219	0.096	1.82052e-280	FB_I	Elovl1
Timm10b	1.24239e-284	0.779169	0.264	0.127	2.45584e-280	FB_I	Timm10b
Eif6	2.09192e-284	0.95411	0.224	0.102	4.13509e-280	FB_I	Eif6
Aurkaip1	5.86258e-284	1.06913	0.218	0.095	1.15886e-279	FB_I	Aurkaip1
Cdc42	5.9093e-284	0.454787	0.662	0.463	1.16809e-279	FB_I	Cdc42
Pcbp2	1.08143e-283	0.470644	0.546	0.343	2.13766e-279	FB_I	Pcbp2
Polr2k	1.50656e-283	0.964993	0.222	0.101	2.97803e-279	FB_I	Polr2k
Sigmar1	2.25256e-283	1.12005	0.192	0.076	4.45264e-279	FB_I	Sigmar1
Eya2	3.17942e-283	-1.43684	0.198	0.342	6.28476e-279	FB_I	Eya2
Plxna4	3.31386e-283	-2.65143	0.042	0.146	6.5505e-279	FB_I	Plxna4
Nucb1	1.57455e-282	0.786756	0.28	0.138	3.1124e-278	FB_I	Nucb1
Mrpl20	1.70082e-282	0.975949	0.228	0.103	3.36201e-278	FB_I	Mrpl20
Nkain2	6.25912e-282	-2.54147	0.068	0.193	1.23724e-277	FB_I	Nkain2
St5	9.16993e-282	-1.13463	0.378	0.493	1.81262e-277	FB_I	St5
Slc35b1	1.32207e-281	0.938294	0.244	0.113	2.61334e-277	FB_I	Slc35b1
Mrpl42	1.3847e-281	0.913588	0.258	0.121	2.73714e-277	FB_I	Mrpl42
Dnpep	1.71603e-281	1.004	0.224	0.099	3.39208e-277	FB_I	Dnpep
Ndufa8	2.80076e-281	1.03554	0.251	0.112	5.53627e-277	FB_I	Ndufa8
Ssr3	5.04155e-281	0.616626	0.358	0.195	9.96563e-277	FB_I	Ssr3
Apoe	6.34418e-281	-0.116367	0.537	0.361	1.25405e-276	FB_I	Apoe
Tgoln1	6.30916e-280	0.848164	0.241	0.112	1.24713e-275	FB_I	Tgoln1
Dynlt3	1.37059e-279	0.909729	0.238	0.111	2.70926e-275	FB_I	Dynlt3
Macf1	1.42355e-279	-0.769924	0.589	0.659	2.81394e-275	FB_I	Macf1
Chchd1	2.53355e-279	0.890601	0.247	0.115	5.00808e-275	FB_I	Chchd1
Scp2	3.47821e-279	0.720163	0.3	0.152	6.87537e-275	FB_I	Scp2
0610012G03Rik	4.30951e-279	0.994608	0.225	0.098	8.51861e-275	FB_I	0610012G03Rik
Psma1	6.73872e-279	0.751692	0.297	0.151	1.33204e-274	FB_I	Psma1
Adap2	1.43413e-278	-1.48527	0.227	0.36	2.83485e-274	FB_I	Adap2
Gstm5	3.85078e-278	0.840456	0.227	0.103	7.61184e-274	FB_I	Gstm5
Duoxa1	7.15356e-278	3.62088	0.056	0.003	1.41404e-273	FB_I	Duoxa1
Psmd8	8.85878e-278	0.947891	0.245	0.114	1.75112e-273	FB_I	Psmd8
Strap	9.67116e-278	1.06418	0.212	0.092	1.9117e-273	FB_I	Strap
Polr2j	1.45812e-277	0.99518	0.21	0.094	2.88226e-273	FB_I	Polr2j
Wdr83os	2.47692e-277	1.13855	0.198	0.083	4.89612e-273	FB_I	Wdr83os
Pln	2.66841e-277	-1.58696	0.049	0.129	5.27465e-273	FB_I	Pln
Ugp2	4.81002e-277	0.608074	0.533	0.349	9.50797e-273	FB_I	Ugp2
Nalcn	5.2271e-277	-1.63289	0.117	0.252	1.03324e-272	FB_I	Nalcn
Tgfb1	5.8872e-277	1.08799	0.219	0.098	1.16372e-272	FB_I	Tgfb1
Phb2	7.29947e-277	0.833068	0.258	0.122	1.44289e-272	FB_I	Phb2
Gtf2h5	1.37295e-276	0.740287	0.29	0.149	2.71391e-272	FB_I	Gtf2h5
Fbln1	1.46308e-276	0.307486	0.611	0.398	2.89207e-272	FB_I	Fbln1
Fibin	2.52892e-276	0.549792	0.304	0.157	4.99892e-272	FB_I	Fibin
Ube2g2	9.34676e-276	0.841784	0.226	0.099	1.84757e-271	FB_I	Ube2g2
Cebpb	1.77192e-275	0.746172	0.358	0.201	3.50254e-271	FB_I	Cebpb
Cryab	3.0047e-275	0.986905	0.324	0.151	5.93938e-271	FB_I	Cryab
Jup	3.98906e-275	0.604949	0.341	0.179	7.88517e-271	FB_I	Jup
Ssna1	8.41734e-275	1.081	0.195	0.082	1.66386e-270	FB_I	Ssna1
Ypel3	1.88554e-274	0.545175	0.453	0.272	3.72714e-270	FB_I	Ypel3
H1f0	6.39023e-274	0.91027	0.266	0.131	1.26316e-269	FB_I	H1f0
Guk1	6.22684e-273	1.07623	0.207	0.09	1.23086e-268	FB_I	Guk1
Tpd52l2	6.51611e-273	0.729237	0.305	0.157	1.28804e-268	FB_I	Tpd52l2
Rab5c	3.60578e-272	0.802158	0.261	0.129	7.12754e-268	FB_I	Rab5c
Rbp1	1.47464e-271	0.451137	0.485	0.302	2.91493e-267	FB_I	Rbp1
Ahsa1	1.68529e-271	0.955023	0.221	0.1	3.3313e-267	FB_I	Ahsa1
Fgf13	6.86447e-271	-1.85559	0.051	0.13	1.3569e-266	FB_I	Fgf13
Lamtor4	7.39604e-271	1.11008	0.198	0.084	1.46198e-266	FB_I	Lamtor4
Stmn4	1.43674e-270	3.25708	0.063	0.007	2.84001e-266	FB_I	Stmn4
Zfyve21	1.55641e-270	0.884718	0.233	0.107	3.07655e-266	FB_I	Zfyve21
Tsn	1.77657e-270	0.665061	0.31	0.162	3.51174e-266	FB_I	Tsn
Lman1	2.18035e-270	0.638455	0.338	0.182	4.30989e-266	FB_I	Lman1
Snapc5	3.48933e-270	0.998405	0.21	0.096	6.89736e-266	FB_I	Snapc5
Sox9	2.25601e-269	0.906307	0.23	0.106	4.45946e-265	FB_I	Sox9
Polr2e	7.38024e-269	1.05161	0.213	0.095	1.45885e-264	FB_I	Polr2e
Atxn1	1.50975e-268	-0.940039	0.464	0.56	2.98432e-264	FB_I	Atxn1
Tmtc1	2.65966e-268	-1.09469	0.335	0.458	5.25735e-264	FB_I	Tmtc1
Cops6	1.12742e-267	1.07746	0.2	0.087	2.22857e-263	FB_I	Cops6
Srm	1.81314e-267	1.17744	0.187	0.076	3.58404e-263	FB_I	Srm
Dnajb1	5.15689e-267	1.69154	0.164	0.065	1.01936e-262	FB_I	Dnajb1
Lrpap1	7.17935e-267	0.798306	0.276	0.138	1.41914e-262	FB_I	Lrpap1
Anp32a	1.56444e-266	0.646483	0.326	0.179	3.09243e-262	FB_I	Anp32a
Fkbp8	1.84938e-266	0.727362	0.286	0.146	3.65566e-262	FB_I	Fkbp8
Adgrg2	2.04966e-266	1.74	0.122	0.036	4.05157e-262	FB_I	Adgrg2
Adamts10	2.21282e-266	-0.898642	0.459	0.564	4.37409e-262	FB_I	Adamts10
Mrpl17	2.23003e-266	0.980682	0.222	0.101	4.4081e-262	FB_I	Mrpl17
Vma21	3.8291e-266	0.934181	0.219	0.099	7.56897e-262	FB_I	Vma21
Prkar1a	1.0668e-265	0.588969	0.412	0.238	2.10874e-261	FB_I	Prkar1a
Dph3	1.10494e-265	0.850576	0.264	0.129	2.18414e-261	FB_I	Dph3
Fam20c	1.53645e-265	0.846718	0.221	0.096	3.03709e-261	FB_I	Fam20c
Fbxl17	1.6192e-265	-0.746032	0.53	0.62	3.20067e-261	FB_I	Fbxl17
Ptov1	1.8796e-265	0.736155	0.299	0.154	3.71541e-261	FB_I	Ptov1
Copz2	1.99815e-265	0.586512	0.371	0.208	3.94974e-261	FB_I	Copz2
Tpm3	2.71703e-265	0.599319	0.438	0.268	5.37074e-261	FB_I	Tpm3
Pard3b	2.80412e-265	-0.562033	0.716	0.757	5.54291e-261	FB_I	Pard3b
Timm8b	5.31576e-265	1.01336	0.205	0.091	1.05077e-260	FB_I	Timm8b
Glul	7.60856e-265	0.58978	0.35	0.19	1.50398e-260	FB_I	Glul
Rraga	2.75678e-264	1.09826	0.194	0.083	5.44932e-260	FB_I	Rraga
Snrpd3	6.5392e-264	0.777466	0.248	0.121	1.2926e-259	FB_I	Snrpd3
Atp5a1	6.66977e-264	0.717192	0.424	0.228	1.31841e-259	FB_I	Atp5a1
Etv6	1.41866e-263	-0.958231	0.418	0.528	2.80427e-259	FB_I	Etv6
Psma5	2.29243e-263	0.84143	0.263	0.129	4.53145e-259	FB_I	Psma5
Sdcbp	3.63489e-263	0.538153	0.395	0.231	7.18509e-259	FB_I	Sdcbp
Grn	4.86834e-263	0.635608	0.306	0.161	9.62324e-259	FB_I	Grn
Nrp1	7.96029e-263	-1.13607	0.401	0.496	1.57351e-258	FB_I	Nrp1
Ccdc12	8.05011e-263	0.79402	0.266	0.135	1.59127e-258	FB_I	Ccdc12
Bri3	1.24347e-262	0.519437	0.396	0.228	2.45796e-258	FB_I	Bri3
Lsm7	1.28444e-262	0.957579	0.223	0.103	2.53896e-258	FB_I	Lsm7
Npdc1	1.32419e-262	0.564555	0.378	0.214	2.61753e-258	FB_I	Npdc1
Rnf150	2.25985e-262	-1.21002	0.271	0.403	4.46704e-258	FB_I	Rnf150
Bzw1	2.56607e-262	0.705452	0.305	0.163	5.07235e-258	FB_I	Bzw1
Cped1	6.48687e-262	-0.655677	0.702	0.737	1.28226e-257	FB_I	Cped1
Vamp8	3.32679e-261	1.0173	0.206	0.095	6.57606e-257	FB_I	Vamp8
Ptprk	5.81001e-261	-1.56496	0.129	0.244	1.14847e-256	FB_I	Ptprk
Pgls	9.45515e-261	0.878016	0.238	0.113	1.869e-256	FB_I	Pgls
Tnfrsf1a	1.00719e-260	0.814688	0.266	0.134	1.99091e-256	FB_I	Tnfrsf1a
Snrpb2	1.2769e-260	0.968856	0.21	0.095	2.52404e-256	FB_I	Snrpb2
Metap2	5.06006e-260	0.610603	0.346	0.192	1.00022e-255	FB_I	Metap2
Arl4a	7.00335e-260	0.990213	0.197	0.083	1.38435e-255	FB_I	Arl4a
Sec11a	7.48345e-260	0.525976	0.413	0.244	1.47925e-255	FB_I	Sec11a
Tecr	1.21982e-259	0.806837	0.299	0.149	2.41121e-255	FB_I	Tecr
Sf3b6	2.26245e-259	0.643123	0.316	0.171	4.47219e-255	FB_I	Sf3b6
Cript	9.08265e-259	0.862793	0.233	0.112	1.79537e-254	FB_I	Cript
Tcf12	1.22e-258	-0.652617	0.599	0.672	2.41158e-254	FB_I	Tcf12
Stx4a	1.43504e-258	0.621825	0.301	0.157	2.83664e-254	FB_I	Stx4a
Fdps	4.38083e-258	1.68885	0.13	0.042	8.65959e-254	FB_I	Fdps
Gm2a	1.39227e-257	1.03942	0.176	0.073	2.7521e-253	FB_I	Gm2a
Ace	1.61863e-257	0.532684	0.373	0.208	3.19955e-253	FB_I	Ace
Sumo3	1.76348e-257	0.835391	0.26	0.132	3.48588e-253	FB_I	Sumo3
Pin1	1.90308e-257	1.0976	0.194	0.084	3.76183e-253	FB_I	Pin1
Sys1	5.06812e-257	0.828726	0.227	0.107	1.00182e-252	FB_I	Sys1
Txn2	2.72833e-256	0.750362	0.281	0.142	5.39308e-252	FB_I	Txn2
Pdpn	7.75266e-256	0.821307	0.224	0.103	1.53247e-251	FB_I	Pdpn
Psmd4	5.19698e-255	0.677607	0.292	0.153	1.02729e-250	FB_I	Psmd4
Myoc	6.143e-255	1.34323	0.145	0.051	1.21429e-250	FB_I	Myoc
Btg1	6.2382e-255	0.915107	0.237	0.119	1.2331e-250	FB_I	Btg1
Bccip	7.77598e-255	0.904479	0.222	0.103	1.53708e-250	FB_I	Bccip
1810058I24Rik	8.72306e-255	0.669554	0.274	0.141	1.72429e-250	FB_I	1810058I24Rik
Eif4ebp1	5.67499e-254	0.850743	0.233	0.11	1.12178e-249	FB_I	Eif4ebp1
Maml3	7.94733e-254	-1.17149	0.227	0.365	1.57095e-249	FB_I	Maml3
Chmp4b	1.02583e-253	0.564271	0.377	0.216	2.02775e-249	FB_I	Chmp4b
Surf4	1.05774e-253	0.757637	0.246	0.119	2.09084e-249	FB_I	Surf4
Aamp	2.03301e-253	0.822078	0.25	0.122	4.01866e-249	FB_I	Aamp
Fndc3b	2.97276e-253	-0.554134	0.799	0.802	5.87625e-249	FB_I	Fndc3b
Col6a6	3.39839e-253	-1.28396	0.239	0.371	6.71759e-249	FB_I	Col6a6
Maged2	3.43505e-253	0.815409	0.27	0.139	6.79007e-249	FB_I	Maged2
Gltp	5.22197e-253	1.21798	0.15	0.055	1.03223e-248	FB_I	Gltp
Thy1	6.56597e-253	1.69034	0.121	0.038	1.2979e-248	FB_I	Thy1
Hypk	1.05181e-252	0.841159	0.241	0.117	2.07911e-248	FB_I	Hypk
Luc7l2	1.22979e-252	-0.609235	0.714	0.742	2.43093e-248	FB_I	Luc7l2
Pofut2	1.42388e-252	0.791102	0.253	0.126	2.81459e-248	FB_I	Pofut2
Ndufs8	1.48075e-252	1.10903	0.201	0.085	2.927e-248	FB_I	Ndufs8
Plekhj1	2.51836e-252	0.948578	0.217	0.1	4.97805e-248	FB_I	Plekhj1
Cox5a	4.90641e-252	0.811107	0.308	0.147	9.69851e-248	FB_I	Cox5a
Eif4g2	6.2627e-252	0.533412	0.42	0.249	1.23795e-247	FB_I	Eif4g2
Rcn1	8.64713e-252	0.58423	0.337	0.184	1.70928e-247	FB_I	Rcn1
Tmem159	9.90462e-252	0.757486	0.248	0.12	1.95785e-247	FB_I	Tmem159
F730311O21Rik	9.97579e-252	2.26461	0.067	0.009	1.97191e-247	FB_I	F730311O21Rik
Elof1	1.63692e-251	1.13012	0.188	0.081	3.23571e-247	FB_I	Elof1
Plp2	4.37919e-251	1.15409	0.189	0.082	8.65634e-247	FB_I	Plp2
Yipf3	5.3829e-251	0.756642	0.261	0.131	1.06404e-246	FB_I	Yipf3
Erp29	5.67071e-251	0.614221	0.312	0.167	1.12093e-246	FB_I	Erp29
Nfkbia	8.41951e-251	0.618682	0.302	0.168	1.66429e-246	FB_I	Nfkbia
Tmem43	9.44384e-251	0.98986	0.183	0.075	1.86676e-246	FB_I	Tmem43
Yif1b	1.46019e-250	0.967441	0.215	0.099	2.88636e-246	FB_I	Yif1b
0610010K14Rik	2.47711e-250	1.22541	0.163	0.065	4.8965e-246	FB_I	0610010K14Rik
B3galt1	4.88775e-250	-0.87431	0.453	0.563	9.66161e-246	FB_I	B3galt1
Cct8	6.53261e-250	0.75834	0.27	0.139	1.2913e-245	FB_I	Cct8
Duox1	9.28602e-250	3.97489	0.051	0.004	1.83557e-245	FB_I	Duox1
Plcl2	2.07572e-249	-1.41286	0.152	0.28	4.10307e-245	FB_I	Plcl2
Ndufa12	2.14532e-249	0.766271	0.253	0.12	4.24066e-245	FB_I	Ndufa12
Txnip	3.87074e-249	0.580362	0.413	0.235	7.65129e-245	FB_I	Txnip
Denr	1.36725e-248	0.720818	0.253	0.127	2.70263e-244	FB_I	Denr
Cxcl14	4.6296e-248	1.18683	0.276	0.152	9.15133e-244	FB_I	Cxcl14
Ptprd	4.98275e-248	-0.984475	0.301	0.433	9.84941e-244	FB_I	Ptprd
Sec13	5.09958e-248	0.754144	0.253	0.126	1.00803e-243	FB_I	Sec13
Psmc4	7.00736e-248	0.946933	0.196	0.088	1.38515e-243	FB_I	Psmc4
Tril	1.48983e-247	1.09522	0.161	0.061	2.94495e-243	FB_I	Tril
Cst6	2.15492e-247	2.45717	0.081	0.016	4.25963e-243	FB_I	Cst6
Commd6	2.93413e-247	1.10725	0.189	0.082	5.79989e-243	FB_I	Commd6
Uqcc3	6.18221e-247	1.13205	0.18	0.076	1.22204e-242	FB_I	Uqcc3
Eif3m	9.60736e-247	0.676714	0.285	0.149	1.89909e-242	FB_I	Eif3m
Cmtm3	1.31636e-246	0.857285	0.217	0.101	2.60204e-242	FB_I	Cmtm3
Apba2	1.85729e-246	-2.84155	0.026	0.121	3.6713e-242	FB_I	Apba2
Mrpl14	1.94071e-246	1.02411	0.208	0.094	3.83619e-242	FB_I	Mrpl14
Zeb1	2.60665e-246	-0.410793	0.861	0.866	5.15257e-242	FB_I	Zeb1
Ube2e2	2.76388e-246	-0.827164	0.558	0.627	5.46337e-242	FB_I	Ube2e2
Cmtm7	3.84403e-246	0.693673	0.275	0.142	7.5985e-242	FB_I	Cmtm7
Ndufb3	4.4034e-246	0.693462	0.27	0.135	8.70419e-242	FB_I	Ndufb3
Scd1	4.95872e-246	1.17129	0.151	0.057	9.80189e-242	FB_I	Scd1
Hic1	5.45923e-246	1.1724	0.169	0.067	1.07913e-241	FB_I	Hic1
Arpc4	6.22866e-246	0.628378	0.289	0.156	1.23122e-241	FB_I	Arpc4
Efemp1	6.76738e-246	0.88576	0.26	0.132	1.33771e-241	FB_I	Efemp1
Htra1	7.59105e-246	0.718187	0.284	0.145	1.50052e-241	FB_I	Htra1
Dnajc8	8.32716e-246	0.656623	0.297	0.16	1.64603e-241	FB_I	Dnajc8
Metrnl	1.14506e-245	1.35116	0.15	0.058	2.26343e-241	FB_I	Metrnl
Rap1b	1.15953e-245	0.44377	0.502	0.324	2.29204e-241	FB_I	Rap1b
Pdcl3	2.34549e-245	0.962484	0.205	0.093	4.63632e-241	FB_I	Pdcl3
Pfdn6	1.10355e-244	1.10827	0.182	0.079	2.18139e-240	FB_I	Pfdn6
Tspan31	2.14081e-244	0.950367	0.213	0.098	4.23174e-240	FB_I	Tspan31
Dctn2	6.28283e-244	0.608737	0.301	0.16	1.24193e-239	FB_I	Dctn2
Slit2	9.19827e-244	-1.12672	0.33	0.456	1.81822e-239	FB_I	Slit2
Actc1	1.24124e-243	-1.51654	0.052	0.118	2.45356e-239	FB_I	Actc1
Bag5	2.01217e-243	1.11624	0.161	0.064	3.97746e-239	FB_I	Bag5
Efemp2	2.01579e-243	0.74116	0.264	0.136	3.98462e-239	FB_I	Efemp2
Lsamp	2.47201e-243	-0.939764	0.458	0.552	4.88643e-239	FB_I	Lsamp
Atp5o	6.87779e-243	0.675729	0.357	0.191	1.35953e-238	FB_I	Atp5o
Mrgprf	7.71915e-243	1.39789	0.117	0.035	1.52584e-238	FB_I	Mrgprf
Mb	8.17143e-243	-1.47053	0.044	0.094	1.61525e-238	FB_I	Mb
Fam89b	1.19946e-242	1.2541	0.164	0.065	2.37097e-238	FB_I	Fam89b
Mrpl54	1.33604e-242	0.968012	0.201	0.092	2.64095e-238	FB_I	Mrpl54
Ccdc85b	1.4242e-242	1.03658	0.185	0.082	2.81522e-238	FB_I	Ccdc85b
Prickle2	2.27287e-242	-1.06204	0.345	0.464	4.49278e-238	FB_I	Prickle2
Gria3	2.33636e-242	-1.77987	0.108	0.231	4.61828e-238	FB_I	Gria3
Sbf2	2.80665e-242	-0.813277	0.501	0.584	5.5479e-238	FB_I	Sbf2
Ebp	3.09695e-242	1.24132	0.148	0.056	6.12175e-238	FB_I	Ebp
Pgk1	6.90465e-242	0.902991	0.211	0.095	1.36484e-237	FB_I	Pgk1
Basp1	9.28834e-242	1.76708	0.119	0.038	1.83603e-237	FB_I	Basp1
Cmss1	9.34473e-242	-0.881725	0.322	0.439	1.84717e-237	FB_I	Cmss1
Nmt1	9.80916e-242	0.696232	0.268	0.136	1.93898e-237	FB_I	Nmt1
Gm12840	1.04993e-241	1.23674	0.19	0.082	2.07539e-237	FB_I	Gm12840
Sdhb	1.67413e-241	0.738999	0.307	0.155	3.30925e-237	FB_I	Sdhb
Hspd1	8.73209e-241	0.829035	0.263	0.132	1.72607e-236	FB_I	Hspd1
Bst2	1.14886e-240	0.694951	0.216	0.104	2.27096e-236	FB_I	Bst2
Esd	1.21877e-240	0.718367	0.263	0.136	2.40914e-236	FB_I	Esd
Slc8a1	1.2979e-240	-0.902282	0.457	0.51	2.56556e-236	FB_I	Slc8a1
Churc1	2.54154e-240	0.914504	0.212	0.098	5.02385e-236	FB_I	Churc1
Vav3	2.68775e-240	-0.90356	0.457	0.552	5.31288e-236	FB_I	Vav3
Polr2i	3.47521e-240	1.0112	0.192	0.087	6.86944e-236	FB_I	Polr2i
Atf3	3.68309e-240	1.66781	0.158	0.066	7.28036e-236	FB_I	Atf3
Arpc1a	7.80822e-240	0.573304	0.331	0.186	1.54345e-235	FB_I	Arpc1a
Lhfp	1.88324e-239	-0.53912	0.919	0.886	3.7226e-235	FB_I	Lhfp
Ralbp1	2.2512e-239	0.463362	0.449	0.278	4.44994e-235	FB_I	Ralbp1
Rapgef5	2.42226e-239	-2.17513	0.05	0.146	4.78808e-235	FB_I	Rapgef5
Tmem107	2.91378e-239	1.05824	0.16	0.063	5.75966e-235	FB_I	Tmem107
Arap1	5.64538e-239	0.770425	0.223	0.102	1.11592e-234	FB_I	Arap1
Tmbim1	6.05961e-239	0.63052	0.263	0.133	1.1978e-234	FB_I	Tmbim1
Lyz2	1.57814e-238	-0.641843	0.05	0.045	3.11951e-234	FB_I	Lyz2
C1qbp	3.55905e-238	1.05866	0.18	0.077	7.03517e-234	FB_I	C1qbp
H2afv	7.09676e-238	0.598949	0.328	0.184	1.40282e-233	FB_I	H2afv
Erh	1.1096e-237	0.819554	0.235	0.117	2.19335e-233	FB_I	Erh
Pdlim3	1.12686e-237	-2.14092	0.07	0.183	2.22747e-233	FB_I	Pdlim3
Dock10	1.62631e-237	-1.3132	0.207	0.336	3.21474e-233	FB_I	Dock10
Scml4	4.68972e-237	1.1453	0.142	0.05	9.27018e-233	FB_I	Scml4
Clptm1l	9.211e-237	0.851287	0.22	0.105	1.82074e-232	FB_I	Clptm1l
Polr2c	2.77745e-236	0.94825	0.199	0.089	5.49019e-232	FB_I	Polr2c
Irf2bpl	3.106e-236	0.794424	0.235	0.113	6.13964e-232	FB_I	Irf2bpl
Mocs2	4.62894e-236	0.88469	0.211	0.098	9.15003e-232	FB_I	Mocs2
Tpi1	5.36145e-236	0.790697	0.25	0.124	1.0598e-231	FB_I	Tpi1
Cdh2	6.64717e-236	-1.84568	0.044	0.119	1.31395e-231	FB_I	Cdh2
Gpi1	1.11897e-235	0.688701	0.277	0.143	2.21186e-231	FB_I	Gpi1
Unc50	1.22995e-235	0.828649	0.216	0.102	2.43125e-231	FB_I	Unc50
Gm20388	1.41503e-235	-1.154	0.122	0.253	2.79709e-231	FB_I	Gm20388
Myl12b	2.01568e-235	0.5098	0.378	0.222	3.98439e-231	FB_I	Myl12b
Cacnb2	3.95645e-235	-1.81232	0.044	0.107	7.82072e-231	FB_I	Cacnb2
Npm3	5.06428e-235	1.16546	0.17	0.072	1.00106e-230	FB_I	Npm3
Nol7	1.2676e-234	0.874402	0.22	0.105	2.50567e-230	FB_I	Nol7
Ackr2	2.54921e-234	3.46769	0.049	0.003	5.03902e-230	FB_I	Ackr2
Vdac2	1.74222e-233	0.670154	0.304	0.161	3.44385e-229	FB_I	Vdac2
Zfp36l1	1.99314e-233	0.399544	0.51	0.328	3.93985e-229	FB_I	Zfp36l1
Tubb4b	3.12253e-233	0.956443	0.206	0.095	6.1723e-229	FB_I	Tubb4b
Tex264	1.28007e-232	0.758317	0.239	0.118	2.53031e-228	FB_I	Tex264
Tnni3	1.37714e-232	-1.68072	0.035	0.081	2.7222e-228	FB_I	Tnni3
Dmd	1.67758e-232	-1.20209	0.194	0.253	3.31607e-228	FB_I	Dmd
Trappc2l	1.92499e-232	0.9051	0.207	0.097	3.80513e-228	FB_I	Trappc2l
Pgrmc1	3.14664e-232	0.795359	0.231	0.116	6.21997e-228	FB_I	Pgrmc1
Arl2bp	3.86936e-232	0.914228	0.193	0.087	7.64856e-228	FB_I	Arl2bp
Rab7	6.75348e-232	0.490664	0.429	0.262	1.33496e-227	FB_I	Rab7
Mafb	7.66371e-232	1.04162	0.174	0.075	1.51489e-227	FB_I	Mafb
Dnajc3	1.4293e-231	0.548193	0.433	0.269	2.82529e-227	FB_I	Dnajc3
Meis1	1.56774e-231	-0.964384	0.373	0.485	3.09895e-227	FB_I	Meis1
Psmb2	1.86265e-231	0.478582	0.386	0.231	3.6819e-227	FB_I	Psmb2
Nbea	3.45806e-231	-0.841275	0.394	0.504	6.83554e-227	FB_I	Nbea
Mrpl36	5.25638e-231	1.18102	0.166	0.069	1.03903e-226	FB_I	Mrpl36
Jtb	6.47254e-231	0.733679	0.237	0.118	1.27943e-226	FB_I	Jtb
Eif4h	9.49802e-231	0.506756	0.363	0.21	1.87747e-226	FB_I	Eif4h
Greb1l	1.93176e-230	-1.31359	0.178	0.307	3.81852e-226	FB_I	Greb1l
mt-Nd5	2.95616e-230	0.514606	0.366	0.21	5.84344e-226	FB_I	mt-Nd5
Eif5b	1.06772e-229	0.497517	0.404	0.243	2.11057e-225	FB_I	Eif5b
Arpc5l	1.34857e-229	0.856214	0.208	0.098	2.66572e-225	FB_I	Arpc5l
Svbp	2.5037e-229	0.815818	0.222	0.109	4.94907e-225	FB_I	Svbp
Triobp	3.38245e-229	0.908816	0.185	0.081	6.6861e-225	FB_I	Triobp
Plcl1	4.89063e-229	-0.918146	0.369	0.484	9.66731e-225	FB_I	Plcl1
Supt4a	4.89451e-229	0.848735	0.204	0.098	9.67498e-225	FB_I	Supt4a
Txndc15	6.56876e-229	0.680659	0.26	0.133	1.29845e-224	FB_I	Txndc15
Pld1	7.36463e-229	-1.03907	0.32	0.437	1.45577e-224	FB_I	Pld1
Nhp2	1.103e-228	1.21361	0.161	0.067	2.1803e-224	FB_I	Nhp2
Tmem9b	9.01326e-228	0.775741	0.229	0.112	1.78165e-223	FB_I	Tmem9b
Ndufb7	1.65103e-227	0.576228	0.309	0.158	3.26358e-223	FB_I	Ndufb7
Inhbb	1.88157e-227	1.74594	0.077	0.016	3.71929e-223	FB_I	Inhbb
Gna11	2.78675e-227	0.802567	0.223	0.108	5.50856e-223	FB_I	Gna11
Commd1	3.17684e-227	0.527172	0.272	0.142	6.27966e-223	FB_I	Commd1
Ncl	6.78399e-227	0.528825	0.37	0.22	1.34099e-222	FB_I	Ncl
Psmc2	7.39796e-227	0.810913	0.218	0.103	1.46236e-222	FB_I	Psmc2
Rheb	1.51979e-226	0.429009	0.437	0.273	3.00417e-222	FB_I	Rheb
Rbm42	1.89381e-226	0.854784	0.2	0.092	3.74349e-222	FB_I	Rbm42
Mrpl53	3.52494e-226	1.04489	0.178	0.077	6.96774e-222	FB_I	Mrpl53
Lefty1	3.68428e-226	1.5207	0.111	0.034	7.28272e-222	FB_I	Lefty1
Slc25a3	4.67012e-226	0.466236	0.461	0.286	9.23142e-222	FB_I	Slc25a3
Rhog	7.69545e-226	1.09855	0.142	0.054	1.52116e-221	FB_I	Rhog
Mapk3	1.11078e-225	0.79684	0.201	0.095	2.19567e-221	FB_I	Mapk3
Nucb2	1.27829e-225	0.69505	0.266	0.142	2.5268e-221	FB_I	Nucb2
Bcap31	1.29599e-225	0.550132	0.316	0.178	2.56178e-221	FB_I	Bcap31
Sf3b2	1.49685e-225	0.489856	0.376	0.221	2.95881e-221	FB_I	Sf3b2
Ckap4	4.22249e-225	0.640429	0.254	0.128	8.34659e-221	FB_I	Ckap4
Ociad1	4.59687e-225	0.618096	0.296	0.161	9.08663e-221	FB_I	Ociad1
Stag1	7.80736e-225	-0.644706	0.608	0.664	1.54328e-220	FB_I	Stag1
Emc3	1.01956e-224	0.630836	0.262	0.136	2.01537e-220	FB_I	Emc3
Klf6	8.55402e-224	0.53567	0.374	0.226	1.69087e-219	FB_I	Klf6
Creg1	2.35339e-223	0.950824	0.21	0.1	4.65195e-219	FB_I	Creg1
Kdelr3	2.44045e-223	0.484001	0.371	0.217	4.82404e-219	FB_I	Kdelr3
Litaf	4.13915e-223	0.518427	0.362	0.216	8.18185e-219	FB_I	Litaf
Ppa1	8.82995e-223	1.06396	0.163	0.069	1.74542e-218	FB_I	Ppa1
Aip	9.42114e-223	0.933512	0.177	0.077	1.86228e-218	FB_I	Aip
Mrpl18	1.61106e-222	0.974549	0.186	0.085	3.18458e-218	FB_I	Mrpl18
Map2k2	2.04066e-222	0.556294	0.313	0.173	4.03377e-218	FB_I	Map2k2
Rcn2	2.09946e-222	0.525084	0.312	0.172	4.15001e-218	FB_I	Rcn2
Etfb	3.34395e-222	1.08253	0.237	0.103	6.60999e-218	FB_I	Etfb
Fam174a	4.70489e-222	0.842575	0.207	0.097	9.30015e-218	FB_I	Fam174a
Ufc1	6.90233e-222	0.721734	0.244	0.125	1.36438e-217	FB_I	Ufc1
Nr3c2	2.28093e-221	-1.14611	0.21	0.32	4.50872e-217	FB_I	Nr3c2
Dhrs7	2.85909e-221	0.729293	0.221	0.108	5.65157e-217	FB_I	Dhrs7
Rad23a	5.01322e-221	0.957435	0.188	0.084	9.90963e-217	FB_I	Rad23a
Akr1b3	4.03429e-220	0.787031	0.242	0.12	7.97459e-216	FB_I	Akr1b3
Timm23	6.47769e-220	0.539312	0.306	0.167	1.28044e-215	FB_I	Timm23
Vapb	7.27286e-220	0.588145	0.288	0.159	1.43763e-215	FB_I	Vapb
Sfxn3	1.01643e-219	0.964686	0.163	0.067	2.00918e-215	FB_I	Sfxn3
Spag7	1.11271e-219	0.922297	0.193	0.087	2.1995e-215	FB_I	Spag7
Mrpl51	1.13546e-219	0.987032	0.197	0.089	2.24447e-215	FB_I	Mrpl51
Cdkn2c	1.52e-219	1.05006	0.173	0.075	3.00458e-215	FB_I	Cdkn2c
Maf1	1.62583e-219	0.884626	0.188	0.085	3.21377e-215	FB_I	Maf1
Eif3d	2.12931e-219	0.969494	0.178	0.079	4.209e-215	FB_I	Eif3d
Cxcl16	5.60085e-219	1.0853	0.181	0.082	1.10712e-214	FB_I	Cxcl16
Cd74	6.1746e-219	-2.32914	0.013	0.02	1.22053e-214	FB_I	Cd74
Prdx4	8.86526e-219	0.57924	0.288	0.158	1.7524e-214	FB_I	Prdx4
Ubald2	2.79828e-218	0.842717	0.199	0.094	5.53136e-214	FB_I	Ubald2
Eif1a	2.81123e-218	0.784601	0.215	0.106	5.55696e-214	FB_I	Eif1a
Cnpy3	9.65176e-218	1.00185	0.187	0.086	1.90786e-213	FB_I	Cnpy3
Tmem167	1.2745e-217	0.372367	0.461	0.291	2.51931e-213	FB_I	Tmem167
Tmem147	1.74037e-217	0.925938	0.207	0.099	3.44019e-213	FB_I	Tmem147
Snrpc	3.17741e-217	0.820007	0.211	0.104	6.28078e-213	FB_I	Snrpc
Bola3	4.21066e-217	0.96187	0.2	0.093	8.32322e-213	FB_I	Bola3
Fhl2	7.13415e-217	-1.31026	0.133	0.203	1.41021e-212	FB_I	Fhl2
Notch3	7.86369e-217	-2.24153	0.046	0.135	1.55441e-212	FB_I	Notch3
Golga7	1.08461e-216	0.559304	0.29	0.159	2.14394e-212	FB_I	Golga7
Insr	1.81705e-216	-1.19565	0.188	0.295	3.59176e-212	FB_I	Insr
Itga8	5.35216e-216	-2.1032	0.065	0.166	1.05796e-211	FB_I	Itga8
Tvp23b	1.70955e-215	0.782107	0.23	0.117	3.37927e-211	FB_I	Tvp23b
Sdhd	1.73566e-215	1.13155	0.172	0.073	3.43088e-211	FB_I	Sdhd
Gabarapl1	3.70941e-215	0.713925	0.231	0.115	7.3324e-211	FB_I	Gabarapl1
Rab11a	5.69444e-215	0.544207	0.288	0.162	1.12562e-210	FB_I	Rab11a
Phactr1	1.38138e-214	-1.21423	0.187	0.312	2.73058e-210	FB_I	Phactr1
Trappc4	1.85827e-214	0.849135	0.208	0.102	3.67324e-210	FB_I	Trappc4
D630033O11Rik	8.38182e-214	1.27621	0.111	0.036	1.65683e-209	FB_I	D630033O11Rik
Gdi2	8.63288e-214	0.392051	0.512	0.338	1.70646e-209	FB_I	Gdi2
Man2a1	1.20091e-213	-1.11912	0.388	0.486	2.37384e-209	FB_I	Man2a1
Zeb2	3.31978e-213	-0.60068	0.809	0.796	6.5622e-209	FB_I	Zeb2
Emilin1	5.55967e-213	0.502038	0.347	0.202	1.09898e-208	FB_I	Emilin1
Derl1	5.60066e-213	0.552486	0.312	0.178	1.10708e-208	FB_I	Derl1
Gstm2	7.4787e-213	0.748925	0.215	0.103	1.47831e-208	FB_I	Gstm2
Tm4sf1	1.43145e-212	0.370151	0.348	0.211	2.82955e-208	FB_I	Tm4sf1
Thoc7	3.53784e-212	0.5483	0.296	0.166	6.99324e-208	FB_I	Thoc7
Insig2	5.66568e-212	0.528144	0.272	0.144	1.11994e-207	FB_I	Insig2
Cib1	9.76629e-212	1.18496	0.14	0.055	1.9305e-207	FB_I	Cib1
Pin4	1.81397e-211	1.09682	0.155	0.066	3.58568e-207	FB_I	Pin4
Csgalnact1	3.13221e-211	-1.13259	0.309	0.42	6.19144e-207	FB_I	Csgalnact1
Hsd3b7	4.03581e-211	1.11057	0.121	0.042	7.97758e-207	FB_I	Hsd3b7
Anxa7	1.54861e-210	0.482048	0.341	0.198	3.06113e-206	FB_I	Anxa7
Lrrc59	1.9525e-210	0.635537	0.238	0.123	3.85951e-206	FB_I	Lrrc59
Acss3	3.94139e-210	-1.87102	0.078	0.182	7.79095e-206	FB_I	Acss3
Palld	4.17492e-210	-1.72177	0.071	0.151	8.25257e-206	FB_I	Palld
Glmp	8.18456e-210	0.830084	0.204	0.099	1.61784e-205	FB_I	Glmp
Bad	1.65503e-209	0.950898	0.195	0.092	3.27149e-205	FB_I	Bad
Rab14	2.11997e-209	0.393681	0.452	0.288	4.19055e-205	FB_I	Rab14
Trim8	2.12585e-209	0.836212	0.164	0.069	4.20216e-205	FB_I	Trim8
Psma6	5.57623e-209	0.635591	0.243	0.128	1.10225e-204	FB_I	Psma6
Mrps36	6.38525e-209	1.02124	0.182	0.082	1.26217e-204	FB_I	Mrps36
Asah1	7.85751e-209	0.604253	0.269	0.144	1.55319e-204	FB_I	Asah1
Atp6ap2	1.13459e-208	0.61698	0.247	0.129	2.24274e-204	FB_I	Atp6ap2
Glrx5	1.94816e-208	1.15297	0.167	0.071	3.85092e-204	FB_I	Glrx5
Saraf	2.00103e-208	0.54727	0.313	0.177	3.95543e-204	FB_I	Saraf
Phb	2.04684e-208	0.856039	0.192	0.087	4.04599e-204	FB_I	Phb
Ssr1	2.34736e-208	0.583196	0.295	0.164	4.64002e-204	FB_I	Ssr1
Fkbp3	2.37348e-208	0.704927	0.247	0.128	4.69166e-204	FB_I	Fkbp3
Cdk4	3.28186e-208	0.774015	0.224	0.115	6.48726e-204	FB_I	Cdk4
Pet100	3.45086e-208	0.788487	0.198	0.097	6.82131e-204	FB_I	Pet100
Pnrc2	9.96466e-208	0.987297	0.166	0.072	1.96971e-203	FB_I	Pnrc2
Kcnt2	1.28507e-207	-0.375103	0.798	0.821	2.54021e-203	FB_I	Kcnt2
Apbb2	3.17106e-207	-1.17586	0.248	0.357	6.26823e-203	FB_I	Apbb2
Dpy30	8.35818e-207	0.765813	0.204	0.099	1.65216e-202	FB_I	Dpy30
Tmed1	6.60905e-206	0.98675	0.182	0.084	1.30641e-201	FB_I	Tmed1
Mrpl12	6.95736e-206	0.981104	0.181	0.08	1.37526e-201	FB_I	Mrpl12
Arhgap21	7.09073e-206	-0.792554	0.469	0.548	1.40162e-201	FB_I	Arhgap21
Ddx17	7.72324e-206	-0.802832	0.42	0.513	1.52665e-201	FB_I	Ddx17
Mat2b	9.44603e-206	0.568174	0.254	0.134	1.8672e-201	FB_I	Mat2b
Bet1l	4.87692e-205	0.623773	0.239	0.125	9.64022e-201	FB_I	Bet1l
Zcchc7	7.10151e-205	-0.642043	0.505	0.593	1.40376e-200	FB_I	Zcchc7
Ormdl2	8.07407e-205	0.926455	0.153	0.064	1.596e-200	FB_I	Ormdl2
Pigp	9.79875e-205	0.718703	0.229	0.119	1.93692e-200	FB_I	Pigp
Arf6	1.31001e-204	1.02507	0.166	0.073	2.58949e-200	FB_I	Arf6
F2r	2.37983e-204	0.581138	0.303	0.175	4.70421e-200	FB_I	F2r
Hnrnpa1	4.64247e-204	0.53825	0.266	0.144	9.17676e-200	FB_I	Hnrnpa1
Lsm6	6.51219e-204	0.832582	0.188	0.09	1.28726e-199	FB_I	Lsm6
Myo1d	2.34006e-203	-1.43699	0.123	0.234	4.6256e-199	FB_I	Myo1d
R3hdm4	2.64329e-203	0.65145	0.242	0.126	5.22499e-199	FB_I	R3hdm4
Cxxc5	3.28162e-203	0.640364	0.243	0.125	6.48678e-199	FB_I	Cxxc5
Ghitm	4.41011e-203	0.827607	0.212	0.102	8.71747e-199	FB_I	Ghitm
2310043O21Rik	4.48829e-203	2.0825	0.066	0.012	8.87201e-199	FB_I	2310043O21Rik
Nudt18	7.38613e-203	1.41489	0.122	0.044	1.46002e-198	FB_I	Nudt18
Snx17	1.19459e-202	0.853506	0.186	0.087	2.36134e-198	FB_I	Snx17
Camk1	1.7955e-202	0.597809	0.249	0.133	3.54917e-198	FB_I	Camk1
Nars	1.86701e-202	0.640307	0.249	0.133	3.69051e-198	FB_I	Nars
Ssb	2.61773e-202	0.436611	0.374	0.229	5.17447e-198	FB_I	Ssb
Fam111a	3.1644e-202	0.956915	0.151	0.063	6.25506e-198	FB_I	Fam111a
Cnih4	1.2961e-201	0.716922	0.203	0.099	2.56199e-197	FB_I	Cnih4
Cyth3	1.63885e-201	-0.760386	0.613	0.649	3.23951e-197	FB_I	Cyth3
Mrps18a	2.93598e-201	0.809102	0.195	0.094	5.80356e-197	FB_I	Mrps18a
Uqcrfs1	3.20646e-201	0.993069	0.203	0.092	6.3382e-197	FB_I	Uqcrfs1
Ankrd44	4.02449e-201	-1.267	0.207	0.319	7.95521e-197	FB_I	Ankrd44
Sgta	4.14507e-201	0.592913	0.225	0.113	8.19355e-197	FB_I	Sgta
Ube2b	4.31688e-201	0.398243	0.414	0.249	8.53318e-197	FB_I	Ube2b
Zbtb7a	7.46367e-201	0.574091	0.28	0.153	1.47534e-196	FB_I	Zbtb7a
Txnl4a	7.55597e-201	1.03076	0.16	0.07	1.49359e-196	FB_I	Txnl4a
Zcrb1	8.54205e-201	0.641591	0.237	0.126	1.68851e-196	FB_I	Zcrb1
Rps27rt	9.19689e-201	0.952354	0.162	0.074	1.81795e-196	FB_I	Rps27rt
Acp1	1.22233e-200	0.731556	0.221	0.114	2.41618e-196	FB_I	Acp1
Cbx3	1.46872e-200	0.485216	0.352	0.213	2.90321e-196	FB_I	Cbx3
Cox20	1.93952e-200	0.760902	0.213	0.108	3.83385e-196	FB_I	Cox20
Eif3l	1.97576e-200	0.866698	0.199	0.097	3.90549e-196	FB_I	Eif3l
Hunk	2.26712e-200	-2.37111	0.044	0.133	4.48142e-196	FB_I	Hunk
Capn2	2.55398e-200	0.394514	0.453	0.292	5.04844e-196	FB_I	Capn2
Sh3glb1	3.1289e-200	0.382802	0.534	0.36	6.18489e-196	FB_I	Sh3glb1
Col14a1	4.91879e-200	0.467525	0.366	0.22	9.72297e-196	FB_I	Col14a1
Spr	7.30404e-200	0.850187	0.187	0.088	1.44379e-195	FB_I	Spr
Fap	7.65827e-200	-1.30636	0.258	0.367	1.51381e-195	FB_I	Fap
Wdr61	1.05698e-199	0.660988	0.213	0.106	2.08933e-195	FB_I	Wdr61
Dynlt1f	1.30611e-199	1.07962	0.126	0.047	2.58178e-195	FB_I	Dynlt1f
Sorbs2	1.47577e-199	-1.98546	0.032	0.095	2.91716e-195	FB_I	Sorbs2
Snrpd1	3.06353e-199	0.71228	0.219	0.113	6.05568e-195	FB_I	Snrpd1
Lmo4	4.91824e-199	0.33144	0.377	0.226	9.72188e-195	FB_I	Lmo4
Nsmce4a	5.25052e-199	1.0723	0.159	0.07	1.03787e-194	FB_I	Nsmce4a
Emp2	5.65129e-199	0.676316	0.234	0.119	1.11709e-194	FB_I	Emp2
Fam104a	2.07284e-198	0.588938	0.252	0.137	4.09739e-194	FB_I	Fam104a
Dpysl2	5.83473e-198	0.383205	0.548	0.374	1.15335e-193	FB_I	Dpysl2
Psmd6	6.41149e-198	0.893745	0.179	0.081	1.26736e-193	FB_I	Psmd6
Gucy1a2	6.92108e-198	-0.902409	0.328	0.441	1.36809e-193	FB_I	Gucy1a2
Hsd17b10	8.54951e-198	1.01436	0.176	0.081	1.68998e-193	FB_I	Hsd17b10
Cwc15	1.04529e-197	0.681465	0.219	0.115	2.06623e-193	FB_I	Cwc15
Cd36	1.66246e-197	-2.60349	0.04	0.129	3.28619e-193	FB_I	Cd36
Sqstm1	2.18301e-197	0.449989	0.401	0.251	4.31515e-193	FB_I	Sqstm1
Emc4	3.78457e-197	0.873106	0.175	0.08	7.48096e-193	FB_I	Emc4
Nr1d2	4.39633e-197	-1.00997	0.169	0.283	8.69022e-193	FB_I	Nr1d2
Rnf11	5.56808e-197	0.490267	0.318	0.183	1.10064e-192	FB_I	Rnf11
Vcp	5.60407e-197	0.443815	0.393	0.241	1.10776e-192	FB_I	Vcp
Spg21	5.84625e-197	0.837992	0.192	0.094	1.15563e-192	FB_I	Spg21
Capzb	8.52964e-197	0.417754	0.41	0.259	1.68605e-192	FB_I	Capzb
Trim47	1.01155e-196	0.563021	0.275	0.152	1.99954e-192	FB_I	Trim47
Cct2	1.09443e-196	0.755614	0.214	0.109	2.16336e-192	FB_I	Cct2
Taf10	1.49745e-196	0.852956	0.18	0.084	2.96e-192	FB_I	Taf10
Tubb4a	1.72678e-196	1.42786	0.09	0.025	3.41333e-192	FB_I	Tubb4a
C1ra	2.63237e-196	0.549001	0.254	0.134	5.2034e-192	FB_I	C1ra
Grpel1	3.41691e-196	1.03707	0.153	0.068	6.7542e-192	FB_I	Grpel1
Spcs3	4.12758e-196	0.813907	0.202	0.099	8.159e-192	FB_I	Spcs3
Hras	4.25241e-196	1.16642	0.148	0.062	8.40575e-192	FB_I	Hras
Hlf	5.62112e-196	-1.38656	0.118	0.228	1.11113e-191	FB_I	Hlf
Vps13b	8.45276e-196	-0.819895	0.314	0.432	1.67086e-191	FB_I	Vps13b
Ces1d	1.22994e-195	1.29369	0.114	0.035	2.43123e-191	FB_I	Ces1d
Mrpl57	8.14638e-195	0.923394	0.172	0.08	1.61029e-190	FB_I	Mrpl57
Bcas2	1.02968e-194	0.658343	0.224	0.116	2.03537e-190	FB_I	Bcas2
Dock4	1.28839e-194	-1.19649	0.231	0.338	2.54675e-190	FB_I	Dock4
Rgmb	1.33043e-194	0.447596	0.288	0.157	2.62985e-190	FB_I	Rgmb
B3gnt9	1.39403e-194	0.87972	0.188	0.09	2.75557e-190	FB_I	B3gnt9
Cndp2	1.63423e-194	0.695306	0.177	0.082	3.23038e-190	FB_I	Cndp2
Polr2g	3.20579e-194	0.869852	0.171	0.079	6.33689e-190	FB_I	Polr2g
Dennd1a	5.02776e-194	-0.697716	0.509	0.58	9.93838e-190	FB_I	Dennd1a
Dbndd2	9.57219e-194	1.06862	0.131	0.052	1.89213e-189	FB_I	Dbndd2
Ebf1	1.14128e-193	-0.137892	0.892	0.888	2.25596e-189	FB_I	Ebf1
Bhlhe40	2.08331e-193	0.604573	0.255	0.138	4.11808e-189	FB_I	Bhlhe40
Ppp1r12b	2.69405e-193	-1.00972	0.273	0.364	5.32533e-189	FB_I	Ppp1r12b
Arid1b	3.04696e-193	-0.715333	0.465	0.551	6.02292e-189	FB_I	Arid1b
Abracl	4.16067e-193	0.712697	0.201	0.102	8.2244e-189	FB_I	Abracl
Ptprm	4.50209e-193	-0.875252	0.497	0.547	8.89928e-189	FB_I	Ptprm
Sh3rf3	5.57855e-193	-1.23017	0.208	0.323	1.10271e-188	FB_I	Sh3rf3
Rrp1	6.9524e-193	0.798603	0.196	0.096	1.37428e-188	FB_I	Rrp1
Ostf1	7.21168e-193	0.45588	0.328	0.196	1.42553e-188	FB_I	Ostf1
2310011J03Rik	1.13485e-192	0.978784	0.161	0.071	2.24326e-188	FB_I	2310011J03Rik
Ebna1bp2	1.40581e-192	0.864209	0.173	0.081	2.77887e-188	FB_I	Ebna1bp2
Ttc28	1.57982e-192	-0.653213	0.599	0.647	3.12283e-188	FB_I	Ttc28
Ptprg	3.04398e-192	-1.07483	0.417	0.483	6.01704e-188	FB_I	Ptprg
Znhit1	4.99359e-192	0.872897	0.184	0.089	9.87083e-188	FB_I	Znhit1
Bub3	7.93834e-192	0.569898	0.236	0.126	1.56917e-187	FB_I	Bub3
Plekhh2	9.27475e-192	-1.05836	0.264	0.376	1.83334e-187	FB_I	Plekhh2
Lsm8	1.00544e-191	0.96195	0.155	0.07	1.98745e-187	FB_I	Lsm8
Eif1ax	1.68866e-191	0.778998	0.215	0.113	3.33797e-187	FB_I	Eif1ax
Cdkn1c	1.98701e-191	0.948209	0.162	0.071	3.92773e-187	FB_I	Cdkn1c
Nedd4l	2.2051e-191	-1.0505	0.26	0.371	4.35883e-187	FB_I	Nedd4l
Rtn4	2.32634e-191	0.311259	0.64	0.455	4.59847e-187	FB_I	Rtn4
Tcea1	5.42667e-191	0.410397	0.35	0.21	1.07269e-186	FB_I	Tcea1
Adk	8.79034e-191	-0.96549	0.394	0.466	1.73759e-186	FB_I	Adk
Amotl1	2.63454e-190	0.45604	0.352	0.21	5.2077e-186	FB_I	Amotl1
Llph	2.74088e-190	0.734877	0.198	0.101	5.41791e-186	FB_I	Llph
Myo10	4.84948e-190	-2.15395	0.05	0.131	9.58596e-186	FB_I	Myo10
Fkbp9	6.56961e-190	0.375997	0.414	0.259	1.29861e-185	FB_I	Fkbp9
Med21	6.65261e-190	0.76707	0.195	0.098	1.31502e-185	FB_I	Med21
Ssrp1	9.15069e-190	0.752315	0.197	0.097	1.80882e-185	FB_I	Ssrp1
Cetn2	1.62336e-189	1.03656	0.156	0.072	3.20889e-185	FB_I	Cetn2
Tgfbr2	3.53795e-189	0.386616	0.464	0.304	6.99347e-185	FB_I	Tgfbr2
Rab11b	4.79753e-189	0.439241	0.359	0.22	9.48327e-185	FB_I	Rab11b
Mapre1	6.91935e-189	0.444967	0.327	0.192	1.36775e-184	FB_I	Mapre1
Adrm1	1.21333e-188	0.958879	0.162	0.072	2.39838e-184	FB_I	Adrm1
Sulf2	1.86347e-188	0.559829	0.279	0.156	3.68353e-184	FB_I	Sulf2
Fkbp5	2.32276e-188	-0.916139	0.426	0.51	4.59139e-184	FB_I	Fkbp5
Sae1	2.95734e-188	0.49661	0.286	0.162	5.84577e-184	FB_I	Sae1
Pgp	3.1385e-188	0.954723	0.158	0.07	6.20387e-184	FB_I	Pgp
Tnrc6b	7.53038e-188	-0.735952	0.517	0.574	1.48853e-183	FB_I	Tnrc6b
Rgs10	1.55796e-187	0.839944	0.144	0.065	3.07962e-183	FB_I	Rgs10
Magoh	1.77688e-187	0.819844	0.163	0.076	3.51236e-183	FB_I	Magoh
Gfra1	1.87436e-187	-1.39817	0.229	0.333	3.70504e-183	FB_I	Gfra1
Mdh1	2.79319e-187	0.715725	0.274	0.139	5.52131e-183	FB_I	Mdh1
Il10rb	3.03569e-187	0.739428	0.164	0.073	6.00066e-183	FB_I	Il10rb
Anxa4	5.77634e-187	0.629739	0.237	0.127	1.14181e-182	FB_I	Anxa4
Ntn4	5.89706e-187	0.721177	0.261	0.142	1.16567e-182	FB_I	Ntn4
Manbal	1.27194e-186	0.632009	0.219	0.112	2.51424e-182	FB_I	Manbal
Cadps2	1.64843e-186	-2.0027	0.047	0.133	3.25846e-182	FB_I	Cadps2
Pa2g4	2.35467e-186	0.823461	0.189	0.094	4.65448e-182	FB_I	Pa2g4
Tmed4	2.47891e-186	0.933802	0.165	0.074	4.90006e-182	FB_I	Tmed4
Nucks1	3.10498e-186	0.47642	0.301	0.174	6.13762e-182	FB_I	Nucks1
Cyc1	4.44509e-186	0.915037	0.229	0.109	8.78661e-182	FB_I	Cyc1
Psma3	4.57926e-186	0.366276	0.468	0.31	9.05182e-182	FB_I	Psma3
Rbms1	5.66963e-186	-0.53251	0.851	0.816	1.12072e-181	FB_I	Rbms1
Sumo1	9.66287e-186	0.321327	0.461	0.301	1.91006e-181	FB_I	Sumo1
Lsm5	1.73476e-185	0.84222	0.177	0.086	3.4291e-181	FB_I	Lsm5
Frg1	4.02261e-185	0.638954	0.203	0.102	7.95149e-181	FB_I	Frg1
Eif3c	5.95191e-185	0.564832	0.279	0.16	1.17651e-180	FB_I	Eif3c
Ier5	6.35399e-185	1.16457	0.147	0.069	1.25599e-180	FB_I	Ier5
Arl15	8.1342e-185	-0.600887	0.671	0.696	1.60789e-180	FB_I	Arl15
Daam1	8.14381e-185	-0.996415	0.348	0.441	1.60979e-180	FB_I	Daam1
Cdk14	9.49562e-185	-0.734769	0.492	0.564	1.877e-180	FB_I	Cdk14
U2af1	1.00275e-184	0.472259	0.299	0.178	1.98213e-180	FB_I	U2af1
Alyref	1.31728e-184	1.13988	0.142	0.06	2.60387e-180	FB_I	Alyref
Ctdsp1	1.90276e-184	0.776124	0.178	0.084	3.76118e-180	FB_I	Ctdsp1
Chst12	2.58581e-184	0.746231	0.175	0.082	5.11136e-180	FB_I	Chst12
Rbm20	2.96313e-184	-1.96699	0.037	0.1	5.85721e-180	FB_I	Rbm20
Plat	4.76166e-184	0.51563	0.246	0.135	9.41237e-180	FB_I	Plat
Ift27	1.00064e-183	0.879009	0.157	0.071	1.97797e-179	FB_I	Ift27
Serinc1	1.04459e-183	0.403589	0.347	0.209	2.06485e-179	FB_I	Serinc1
Rps19bp1	1.29915e-183	1.1865	0.135	0.057	2.56802e-179	FB_I	Rps19bp1
Pten	1.99072e-183	-0.90879	0.468	0.531	3.93507e-179	FB_I	Pten
Pde3a	2.36547e-183	-0.871224	0.42	0.501	4.67583e-179	FB_I	Pde3a
Fchsd2	2.63763e-183	-0.930157	0.325	0.43	5.21381e-179	FB_I	Fchsd2
Rab23	2.70756e-183	0.74908	0.188	0.091	5.35204e-179	FB_I	Rab23
Ap3s1	2.86353e-183	0.378683	0.379	0.238	5.66033e-179	FB_I	Ap3s1
Tmx1	3.05315e-183	0.773333	0.204	0.101	6.03516e-179	FB_I	Tmx1
Atf4	4.4484e-183	0.509933	0.307	0.183	8.79314e-179	FB_I	Atf4
Asna1	4.5357e-183	1.01647	0.138	0.059	8.96572e-179	FB_I	Asna1
Mustn1	4.79471e-183	1.75308	0.075	0.02	9.4777e-179	FB_I	Mustn1
Chst1	5.94221e-183	1.71676	0.066	0.015	1.1746e-178	FB_I	Chst1
Calu	1.1764e-182	0.327978	0.517	0.35	2.32539e-178	FB_I	Calu
Slc48a1	2.05186e-182	0.908421	0.17	0.079	4.05591e-178	FB_I	Slc48a1
Baz2b	2.14908e-182	-0.645907	0.534	0.597	4.24809e-178	FB_I	Baz2b
Rbm3	3.81483e-182	0.385618	0.302	0.175	7.54077e-178	FB_I	Rbm3
Bud31	6.75083e-182	0.708007	0.182	0.091	1.33444e-177	FB_I	Bud31
Thrb	7.25437e-182	-1.24153	0.149	0.233	1.43397e-177	FB_I	Thrb
Erbb4	8.97002e-182	-4.04805	0.018	0.083	1.7731e-177	FB_I	Erbb4
Cmtm6	1.1667e-181	0.921926	0.135	0.056	2.30622e-177	FB_I	Cmtm6
Ppp1r11	1.79955e-181	0.756482	0.202	0.105	3.55717e-177	FB_I	Ppp1r11
Sbds	3.12829e-181	0.546824	0.255	0.141	6.18369e-177	FB_I	Sbds
Fbxo6	5.67937e-181	1.33814	0.104	0.037	1.12264e-176	FB_I	Fbxo6
Sh3gl1	1.00602e-180	0.443379	0.3	0.173	1.98859e-176	FB_I	Sh3gl1
Praf2	2.9038e-180	0.876885	0.171	0.083	5.73994e-176	FB_I	Praf2
1700123O20Rik	3.03898e-180	1.12168	0.138	0.059	6.00715e-176	FB_I	1700123O20Rik
Adgrl2	3.98071e-180	-2.0438	0.042	0.113	7.86867e-176	FB_I	Adgrl2
Ndufv2	5.78477e-180	0.513789	0.288	0.163	1.14348e-175	FB_I	Ndufv2
Dazap2	7.52133e-180	0.687722	0.209	0.108	1.48674e-175	FB_I	Dazap2
Fbxl7	7.55561e-180	-0.742639	0.546	0.605	1.49352e-175	FB_I	Fbxl7
Serf1	1.0507e-179	0.911396	0.159	0.075	2.07692e-175	FB_I	Serf1
Hnrnpa3	1.27371e-179	0.383335	0.517	0.361	2.51775e-175	FB_I	Hnrnpa3
Rab1a	1.2942e-179	0.32494	0.462	0.305	2.55824e-175	FB_I	Rab1a
Fto	2.89262e-179	-0.769648	0.471	0.542	5.71784e-175	FB_I	Fto
Rp9	3.906e-179	0.417649	0.336	0.203	7.72099e-175	FB_I	Rp9
Sat1	4.02516e-179	0.358006	0.479	0.322	7.95654e-175	FB_I	Sat1
Plcb4	4.26574e-179	-1.13973	0.276	0.376	8.43209e-175	FB_I	Plcb4
Psmc1	5.28658e-179	0.601021	0.222	0.118	1.045e-174	FB_I	Psmc1
B230219D22Rik	5.29749e-179	0.522411	0.292	0.17	1.04716e-174	FB_I	B230219D22Rik
Napa	6.42801e-179	0.571273	0.259	0.144	1.27062e-174	FB_I	Napa
Fhod3	7.62891e-179	-2.06531	0.027	0.085	1.50801e-174	FB_I	Fhod3
Xdh	1.79697e-178	-1.02708	0.354	0.436	3.55208e-174	FB_I	Xdh
Cops7a	2.71887e-178	0.804934	0.182	0.088	5.3744e-174	FB_I	Cops7a
Ddrgk1	2.80874e-178	0.579493	0.239	0.129	5.55204e-174	FB_I	Ddrgk1
Ext1	3.54193e-178	-0.490582	0.729	0.735	7.00134e-174	FB_I	Ext1
Naaladl2	4.91401e-178	-0.698705	0.496	0.577	9.71353e-174	FB_I	Naaladl2
Dnajc25	5.98223e-178	0.680017	0.203	0.102	1.18251e-173	FB_I	Dnajc25
P3h4	6.30414e-178	0.818514	0.193	0.097	1.24614e-173	FB_I	P3h4
Cct3	6.52076e-178	0.587587	0.249	0.137	1.28896e-173	FB_I	Cct3
Mrpl4	6.88206e-178	0.697503	0.201	0.1	1.36038e-173	FB_I	Mrpl4
Ptp4a2	8.24287e-178	0.350672	0.495	0.333	1.62937e-173	FB_I	Ptp4a2
Tmem208	1.39902e-177	0.54122	0.259	0.146	2.76545e-173	FB_I	Tmem208
Phf21a	2.10678e-177	-0.66406	0.532	0.593	4.16447e-173	FB_I	Phf21a
Surf1	2.77224e-177	0.973619	0.15	0.067	5.47989e-173	FB_I	Surf1
Chmp1a	2.83108e-177	0.789312	0.172	0.082	5.5962e-173	FB_I	Chmp1a
Ncoa2	3.37385e-177	-0.758355	0.381	0.476	6.66909e-173	FB_I	Ncoa2
Pole4	3.53742e-177	0.754433	0.202	0.105	6.99241e-173	FB_I	Pole4
Aplp2	5.62947e-177	0.347362	0.437	0.281	1.11278e-172	FB_I	Aplp2
Lysmd2	5.66863e-177	0.674145	0.218	0.114	1.12052e-172	FB_I	Lysmd2
Derl2	8.934e-177	0.648345	0.227	0.121	1.76598e-172	FB_I	Derl2
Chmp6	1.48636e-176	1.29397	0.122	0.05	2.93809e-172	FB_I	Chmp6
Hist1h2bc	1.5733e-176	0.708623	0.188	0.099	3.10994e-172	FB_I	Hist1h2bc
Ccl7	1.57627e-176	1.72164	0.131	0.058	3.11581e-172	FB_I	Ccl7
Dchs2	1.84274e-176	-1.7409	0.076	0.169	3.64255e-172	FB_I	Dchs2
Gm15675	2.74569e-176	1.01186	0.153	0.068	5.42741e-172	FB_I	Gm15675
Pigyl	3.89564e-176	1.14443	0.136	0.057	7.70052e-172	FB_I	Pigyl
Aga	4.02099e-176	0.746041	0.184	0.089	7.94829e-172	FB_I	Aga
Itgb1bp1	5.72509e-176	0.846195	0.156	0.073	1.13168e-171	FB_I	Itgb1bp1
Blnk	8.83796e-176	-1.78923	0.088	0.183	1.747e-171	FB_I	Blnk
Tkt	1.0288e-175	0.634027	0.224	0.118	2.03362e-171	FB_I	Tkt
Lgals3bp	2.5417e-175	0.826841	0.158	0.072	5.02418e-171	FB_I	Lgals3bp
Txnl1	2.56145e-175	0.499632	0.27	0.152	5.06322e-171	FB_I	Txnl1
Rsl24d1	2.73886e-175	1.02939	0.145	0.063	5.4139e-171	FB_I	Rsl24d1
Uqcrc1	2.98076e-175	0.704046	0.26	0.132	5.89206e-171	FB_I	Uqcrc1
Chd9	3.41733e-175	-0.547756	0.663	0.692	6.75504e-171	FB_I	Chd9
Plekha6	5.30776e-175	-0.812318	0.44	0.512	1.04918e-170	FB_I	Plekha6
Dek	6.96384e-175	0.516084	0.273	0.157	1.37654e-170	FB_I	Dek
Jkamp	1.16334e-174	0.533071	0.231	0.123	2.29958e-170	FB_I	Jkamp
Msrb1	1.85165e-174	0.887935	0.152	0.07	3.66015e-170	FB_I	Msrb1
Krcc1	1.88571e-174	0.437064	0.325	0.197	3.72749e-170	FB_I	Krcc1
Chmp3	4.22819e-174	0.39929	0.32	0.193	8.35786e-170	FB_I	Chmp3
Armcx3	5.10259e-174	0.581556	0.236	0.129	1.00863e-169	FB_I	Armcx3
Rbm7	5.37143e-174	0.597407	0.222	0.118	1.06177e-169	FB_I	Rbm7
B4gat1	1.47674e-173	1.10961	0.125	0.051	2.91906e-169	FB_I	B4gat1
Plac9b	1.95083e-173	1.69278	0.076	0.022	3.85621e-169	FB_I	Plac9b
Mcfd2	1.95381e-173	0.711439	0.206	0.107	3.8621e-169	FB_I	Mcfd2
Glrx3	2.6234e-173	0.426859	0.33	0.202	5.18567e-169	FB_I	Glrx3
Os9	6.11398e-173	0.490982	0.255	0.142	1.20855e-168	FB_I	Os9
Snx18	8.42822e-173	0.389473	0.352	0.216	1.66601e-168	FB_I	Snx18
Tmem33	8.90173e-173	0.713925	0.188	0.094	1.7596e-168	FB_I	Tmem33
Anxa3	9.43505e-173	0.585791	0.351	0.224	1.86503e-168	FB_I	Anxa3
Park2	1.48471e-172	-1.09906	0.091	0.193	2.93483e-168	FB_I	Park2
Ppp1cc	2.02401e-172	0.396296	0.333	0.203	4.00087e-168	FB_I	Ppp1cc
A230001M10Rik	4.73921e-172	1.8809	0.074	0.02	9.36801e-168	FB_I	A230001M10Rik
Tshz2	4.97357e-172	-0.834806	0.534	0.579	9.83126e-168	FB_I	Tshz2
Fam198b	6.52892e-172	-1.83567	0.04	0.121	1.29057e-167	FB_I	Fam198b
Kif5b	1.28898e-171	0.338153	0.54	0.376	2.54792e-167	FB_I	Kif5b
Medag	1.50662e-171	0.191086	0.624	0.436	2.97814e-167	FB_I	Medag
Txndc9	1.58412e-171	0.564346	0.229	0.123	3.13132e-167	FB_I	Txndc9
Tnnc1	1.62549e-171	-1.64534	0.031	0.074	3.21311e-167	FB_I	Tnnc1
Mrps17	3.38094e-171	0.672694	0.214	0.113	6.68311e-167	FB_I	Mrps17
1110038F14Rik	4.14421e-171	0.72908	0.173	0.084	8.19186e-167	FB_I	1110038F14Rik
Lrp10	5.84904e-171	0.779516	0.174	0.084	1.15618e-166	FB_I	Lrp10
Prkcsh	1.14167e-170	0.672771	0.184	0.092	2.25673e-166	FB_I	Prkcsh
Srsf3	1.69277e-170	0.366603	0.448	0.298	3.3461e-166	FB_I	Srsf3
Mybpc3	1.96807e-170	-1.72461	0.022	0.057	3.89029e-166	FB_I	Mybpc3
Srsf9	2.37769e-170	1.00235	0.16	0.075	4.69997e-166	FB_I	Srsf9
Ccpg1	2.98117e-170	0.512892	0.21	0.108	5.89288e-166	FB_I	Ccpg1
Creld1	4.39151e-170	0.823391	0.14	0.061	8.6807e-166	FB_I	Creld1
Slco2b1	4.42613e-170	-1.35561	0.163	0.266	8.74914e-166	FB_I	Slco2b1
Psmd2	6.5225e-170	0.6896	0.199	0.101	1.2893e-165	FB_I	Psmd2
Lyar	1.27525e-169	1.09093	0.132	0.056	2.52078e-165	FB_I	Lyar
Pole3	1.41722e-169	1.13703	0.13	0.056	2.80141e-165	FB_I	Pole3
Magt1	1.78808e-169	0.48834	0.269	0.154	3.53451e-165	FB_I	Magt1
Mrpl27	2.44109e-169	0.826994	0.175	0.087	4.8253e-165	FB_I	Mrpl27
Nabp2	5.03298e-169	0.675793	0.181	0.091	9.94869e-165	FB_I	Nabp2
Slc39a7	5.14715e-169	0.542771	0.222	0.119	1.01744e-164	FB_I	Slc39a7
Cisd1	5.58332e-169	0.843848	0.166	0.075	1.10365e-164	FB_I	Cisd1
Dpm2	5.88581e-169	0.881868	0.161	0.076	1.16345e-164	FB_I	Dpm2
Rnaseh2c	6.9363e-169	0.817441	0.157	0.076	1.3711e-164	FB_I	Rnaseh2c
Stip1	1.50378e-168	0.753323	0.173	0.083	2.97252e-164	FB_I	Stip1
Cmah	1.74718e-168	3.03312	0.054	0.011	3.45366e-164	FB_I	Cmah
Crtap	1.85201e-168	0.742	0.202	0.106	3.66086e-164	FB_I	Crtap
Cggbp1	2.37698e-168	0.658489	0.21	0.112	4.69857e-164	FB_I	Cggbp1
AY036118	5.54813e-168	-1.18578	0.353	0.422	1.0967e-163	FB_I	AY036118
Znrd1	8.91934e-168	0.854868	0.162	0.079	1.76309e-163	FB_I	Znrd1
Ube2i	9.55996e-168	0.408652	0.329	0.203	1.88972e-163	FB_I	Ube2i
Pard3	1.28607e-167	-0.669216	0.505	0.571	2.54216e-163	FB_I	Pard3
Trappc6b	1.34777e-167	0.373888	0.318	0.191	2.66414e-163	FB_I	Trappc6b
Zmat2	1.37054e-167	0.798378	0.18	0.091	2.70914e-163	FB_I	Zmat2
Mea1	1.37983e-167	1.23954	0.122	0.05	2.72752e-163	FB_I	Mea1
Plpp3	1.80405e-167	0.263443	0.677	0.497	3.56607e-163	FB_I	Plpp3
Rpl10-ps3	2.15187e-167	1.10922	0.13	0.058	4.25359e-163	FB_I	Rpl10-ps3
1110065P20Rik	2.25412e-167	0.919054	0.158	0.075	4.45572e-163	FB_I	1110065P20Rik
Sars	2.3664e-167	0.644032	0.2	0.104	4.67766e-163	FB_I	Sars
Ormdl3	2.72279e-167	0.932897	0.147	0.068	5.38215e-163	FB_I	Ormdl3
Snf8	5.11006e-167	0.565707	0.22	0.12	1.01011e-162	FB_I	Snf8
Grm8	5.75445e-167	-4.2613	0.007	0.064	1.13748e-162	FB_I	Grm8
Syn3	6.49208e-167	-1.83836	0.049	0.131	1.28329e-162	FB_I	Syn3
Ehd1	6.81188e-167	0.66645	0.196	0.104	1.34651e-162	FB_I	Ehd1
Psme1	1.73658e-166	0.783229	0.179	0.09	3.4327e-162	FB_I	Psme1
Rala	2.53753e-166	0.372054	0.287	0.169	5.01593e-162	FB_I	Rala
Vti1b	2.56518e-166	0.439671	0.291	0.171	5.07059e-162	FB_I	Vti1b
Adamts19	2.62241e-166	0.906967	0.156	0.072	5.18371e-162	FB_I	Adamts19
Ddit4	3.3584e-166	0.986955	0.142	0.064	6.63856e-162	FB_I	Ddit4
Cers2	3.52576e-166	0.529976	0.227	0.122	6.96936e-162	FB_I	Cers2
Hax1	5.06857e-166	0.95206	0.146	0.067	1.00191e-161	FB_I	Hax1
Penk	6.21802e-166	0.671324	0.18	0.089	1.22912e-161	FB_I	Penk
Pfdn1	8.13549e-166	0.501937	0.254	0.147	1.60814e-161	FB_I	Pfdn1
Runx1t1	1.27074e-165	-0.999465	0.334	0.425	2.51186e-161	FB_I	Runx1t1
Plbd2	1.39333e-165	0.768536	0.165	0.078	2.7542e-161	FB_I	Plbd2
Ehd2	1.59738e-165	0.392296	0.363	0.232	3.15753e-161	FB_I	Ehd2
Tmem9	3.44446e-165	0.836368	0.149	0.069	6.80867e-161	FB_I	Tmem9
2010111I01Rik	3.4821e-165	-0.773815	0.12	0.229	6.88307e-161	FB_I	2010111I01Rik
Rnaset2b	3.49413e-165	0.92178	0.123	0.049	6.90684e-161	FB_I	Rnaset2b
Rere	3.70698e-165	-0.562955	0.587	0.632	7.32758e-161	FB_I	Rere
Ilk	4.85639e-165	0.375064	0.345	0.214	9.59963e-161	FB_I	Ilk
Prmt1	9.31798e-165	0.701207	0.186	0.096	1.84188e-160	FB_I	Prmt1
Zbtb16	1.07846e-164	-0.724819	0.544	0.59	2.13179e-160	FB_I	Zbtb16
Psmd11	1.10735e-164	0.41482	0.33	0.202	2.18891e-160	FB_I	Psmd11
Setd5	2.7256e-164	-0.664971	0.486	0.554	5.3877e-160	FB_I	Setd5
Nans	3.05156e-164	0.931828	0.146	0.07	6.03201e-160	FB_I	Nans
Nsg1	8.51923e-164	0.978512	0.131	0.056	1.684e-159	FB_I	Nsg1
Commd3	1.09148e-163	0.587783	0.216	0.12	2.15752e-159	FB_I	Commd3
Aff1	1.66819e-163	-0.889351	0.359	0.447	3.29751e-159	FB_I	Aff1
Ifngr2	1.84312e-163	0.771786	0.166	0.077	3.6433e-159	FB_I	Ifngr2
AW112010	1.96958e-163	0.737409	0.122	0.052	3.89328e-159	FB_I	AW112010
P3h3	2.71018e-163	0.357543	0.333	0.205	5.35721e-159	FB_I	P3h3
Ube2n	4.72403e-163	0.344919	0.328	0.204	9.33798e-159	FB_I	Ube2n
Chd2	4.75176e-163	-0.83661	0.319	0.415	9.39281e-159	FB_I	Chd2
Oaz2	7.82214e-163	0.436558	0.279	0.168	1.5462e-158	FB_I	Oaz2
Dnlz	7.85966e-163	0.930896	0.153	0.071	1.55362e-158	FB_I	Dnlz
Ubc	2.11103e-162	0.72344	0.421	0.29	4.17288e-158	FB_I	Ubc
Hmcn2	2.34401e-162	0.383451	0.378	0.233	4.63341e-158	FB_I	Hmcn2
Acaa1a	2.95317e-162	0.559721	0.231	0.127	5.83754e-158	FB_I	Acaa1a
Scara5	4.29387e-162	0.253012	0.544	0.367	8.48768e-158	FB_I	Scara5
Ccnd1	4.71529e-162	0.895685	0.137	0.061	9.32072e-158	FB_I	Ccnd1
Hsph1	5.60143e-162	0.832652	0.156	0.074	1.10723e-157	FB_I	Hsph1
Pold4	5.78456e-162	0.952527	0.149	0.071	1.14343e-157	FB_I	Pold4
Mtfr1l	7.22212e-162	0.78711	0.174	0.084	1.4276e-157	FB_I	Mtfr1l
Nfat5	7.25666e-162	-0.708855	0.465	0.535	1.43442e-157	FB_I	Nfat5
Bola1	1.09942e-161	1.07675	0.119	0.049	2.17323e-157	FB_I	Bola1
Ppp1r14a	2.63375e-161	0.610399	0.223	0.122	5.20614e-157	FB_I	Ppp1r14a
Emc6	2.92124e-161	1.00688	0.135	0.06	5.77442e-157	FB_I	Emc6
Hspa1b	2.95239e-161	1.19123	0.09	0.032	5.83599e-157	FB_I	Hspa1b
Tmem237	3.72436e-161	0.751141	0.16	0.076	7.36195e-157	FB_I	Tmem237
1500009L16Rik	7.29238e-161	0.772739	0.145	0.065	1.44148e-156	FB_I	1500009L16Rik
Dpm1	7.71645e-161	0.487393	0.247	0.14	1.52531e-156	FB_I	Dpm1
Ctsk	1.15535e-160	0.755428	0.165	0.082	2.28379e-156	FB_I	Ctsk
Vamp3	1.3147e-160	0.868229	0.143	0.067	2.59877e-156	FB_I	Vamp3
Slbp	1.34164e-160	0.608991	0.191	0.099	2.65203e-156	FB_I	Slbp
Nt5c	1.47124e-160	0.837706	0.145	0.069	2.90819e-156	FB_I	Nt5c
Cln5	1.48208e-160	0.852513	0.141	0.064	2.92963e-156	FB_I	Cln5
Snw1	1.85323e-160	0.47736	0.241	0.137	3.66328e-156	FB_I	Snw1
Sema6a	2.50788e-160	-1.18217	0.222	0.317	4.95732e-156	FB_I	Sema6a
Ing1	4.97984e-160	0.99089	0.141	0.064	9.84364e-156	FB_I	Ing1
Gadd45g	5.91549e-160	1.35614	0.145	0.073	1.16932e-155	FB_I	Gadd45g
Mrpl32	7.032e-160	0.914016	0.14	0.063	1.39002e-155	FB_I	Mrpl32
Ptprj	7.45701e-160	0.60104	0.457	0.315	1.47403e-155	FB_I	Ptprj
Lamtor3	7.51278e-160	0.696718	0.18	0.09	1.48505e-155	FB_I	Lamtor3
Tcp1	7.61349e-160	0.492828	0.245	0.141	1.50496e-155	FB_I	Tcp1
Gps1	1.23057e-159	0.782991	0.167	0.082	2.43247e-155	FB_I	Gps1
Fnbp1	1.2658e-159	-0.938377	0.308	0.399	2.50211e-155	FB_I	Fnbp1
Mrpl21	4.26006e-159	0.697424	0.17	0.085	8.42086e-155	FB_I	Mrpl21
Ppp2r3a	8.12153e-159	-0.861351	0.409	0.473	1.60538e-154	FB_I	Ppp2r3a
Fbn1	1.14287e-158	0.535627	0.756	0.602	2.25911e-154	FB_I	Fbn1
Tshz3	1.23809e-158	-0.836127	0.421	0.496	2.44734e-154	FB_I	Tshz3
Smim12	1.35623e-158	1.07389	0.114	0.047	2.68085e-154	FB_I	Smim12
Tusc3	2.24644e-158	0.347029	0.374	0.239	4.44054e-154	FB_I	Tusc3
H2-Ab1	2.92452e-158	-0.511375	0.045	0.032	5.7809e-154	FB_I	H2-Ab1
Lrrk1	3.86911e-158	-0.821251	0.395	0.479	7.64807e-154	FB_I	Lrrk1
Ifngr1	3.99127e-158	0.355833	0.461	0.315	7.88954e-154	FB_I	Ifngr1
Lsm2	4.22878e-158	0.910225	0.144	0.068	8.35904e-154	FB_I	Lsm2
Timp3	9.69347e-158	-1.28506	0.494	0.54	1.91611e-153	FB_I	Timp3
Srxn1	1.10459e-157	1.5057	0.082	0.026	2.18345e-153	FB_I	Srxn1
Bnip2	1.10498e-157	0.463063	0.268	0.156	2.18422e-153	FB_I	Bnip2
Psmd13	1.39086e-157	0.515152	0.217	0.118	2.74932e-153	FB_I	Psmd13
Pdgfd	2.20009e-157	-1.8083	0.096	0.179	4.34892e-153	FB_I	Pdgfd
Rab6a	4.45368e-157	0.321095	0.405	0.265	8.80359e-153	FB_I	Rab6a
Eif3b	5.34581e-157	0.590008	0.197	0.106	1.05671e-152	FB_I	Eif3b
Phpt1	1.02217e-156	0.971911	0.134	0.06	2.02053e-152	FB_I	Phpt1
Lpp	1.03434e-156	-0.493851	0.664	0.683	2.04459e-152	FB_I	Lpp
Gadd45gip1	1.2192e-156	1.01569	0.126	0.055	2.40999e-152	FB_I	Gadd45gip1
Cd80	1.3151e-156	1.51519	0.069	0.019	2.59955e-152	FB_I	Cd80
Gatad1	1.62572e-156	0.679418	0.206	0.111	3.21357e-152	FB_I	Gatad1
Sarnp	1.0014e-155	0.27576	0.441	0.295	1.97947e-151	FB_I	Sarnp
Mbd5	1.02617e-155	-0.746995	0.377	0.462	2.02842e-151	FB_I	Mbd5
Snhg6	1.69711e-155	1.04092	0.134	0.061	3.35468e-151	FB_I	Snhg6
Leprotl1	1.85105e-155	0.72624	0.163	0.081	3.65898e-151	FB_I	Leprotl1
Dpysl3	1.92404e-155	0.258038	0.519	0.352	3.80325e-151	FB_I	Dpysl3
C1qtnf2	4.30816e-155	0.552744	0.186	0.096	8.51594e-151	FB_I	C1qtnf2
Pcnp	4.48343e-155	0.319783	0.369	0.237	8.86239e-151	FB_I	Pcnp
Med10	7.3882e-155	1.04334	0.134	0.062	1.46042e-150	FB_I	Med10
Hebp1	7.39428e-155	0.794984	0.152	0.072	1.46163e-150	FB_I	Hebp1
Adh5	9.56317e-155	0.900745	0.145	0.068	1.89035e-150	FB_I	Adh5
Eif4a2	1.14591e-154	0.276884	0.529	0.365	2.26511e-150	FB_I	Eif4a2
Slc3a2	1.61813e-154	0.583586	0.215	0.121	3.19856e-150	FB_I	Slc3a2
Smad7	3.20447e-154	-1.34931	0.154	0.254	6.33428e-150	FB_I	Smad7
Meox1	3.66659e-154	0.482471	0.209	0.117	7.24776e-150	FB_I	Meox1
9130401M01Rik	8.97503e-154	1.00072	0.125	0.055	1.77409e-149	FB_I	9130401M01Rik
Sod2	1.02268e-153	0.80936	0.179	0.085	2.02153e-149	FB_I	Sod2
Camk2d	1.10793e-153	-0.717913	0.44	0.502	2.19004e-149	FB_I	Camk2d
Strn3	1.18016e-153	-0.647132	0.509	0.565	2.33283e-149	FB_I	Strn3
Hprt	2.07681e-153	0.519703	0.208	0.115	4.10522e-149	FB_I	Hprt
Epha4	3.16221e-153	-1.40905	0.1	0.179	6.25075e-149	FB_I	Epha4
Scamp3	3.7303e-153	0.751901	0.148	0.071	7.37369e-149	FB_I	Scamp3
Nckap5	4.5907e-153	-1.09838	0.13	0.209	9.07443e-149	FB_I	Nckap5
Prdx3	5.05109e-153	0.803659	0.155	0.074	9.98448e-149	FB_I	Prdx3
Timm17a	5.35971e-153	0.587077	0.208	0.114	1.05945e-148	FB_I	Timm17a
Abcc9	6.46853e-153	-1.7283	0.032	0.075	1.27863e-148	FB_I	Abcc9
Eif4a3	9.19661e-153	0.709141	0.165	0.081	1.81789e-148	FB_I	Eif4a3
Nxn	1.07176e-152	-1.0482	0.284	0.377	2.11855e-148	FB_I	Nxn
Rpp21	1.33616e-152	0.675639	0.165	0.084	2.64119e-148	FB_I	Rpp21
Tmem106c	1.53192e-152	1.2513	0.093	0.033	3.02815e-148	FB_I	Tmem106c
Tm2d1	2.33836e-152	0.460048	0.262	0.153	4.62223e-148	FB_I	Tm2d1
Hmox1	2.97889e-152	1.57601	0.089	0.035	5.88837e-148	FB_I	Hmox1
Pappa	4.10548e-152	-1.87592	0.061	0.142	8.1153e-148	FB_I	Pappa
Ssbp2	4.38656e-152	-0.72014	0.502	0.559	8.67092e-148	FB_I	Ssbp2
Fmo2	5.37625e-152	-1.34689	0.213	0.304	1.06272e-147	FB_I	Fmo2
Mrpl35	6.71298e-152	1.02974	0.127	0.055	1.32696e-147	FB_I	Mrpl35
Bok	8.94404e-152	0.83506	0.154	0.076	1.76797e-147	FB_I	Bok
Ndufv1	1.61855e-151	0.907166	0.184	0.084	3.19939e-147	FB_I	Ndufv1
Olfm1	2.15818e-151	0.784724	0.128	0.056	4.26608e-147	FB_I	Olfm1
Aimp1	2.18101e-151	0.565861	0.211	0.118	4.3112e-147	FB_I	Aimp1
Jarid2	2.4432e-151	-0.809041	0.325	0.415	4.82947e-147	FB_I	Jarid2
Vbp1	2.66612e-151	0.606042	0.189	0.101	5.27012e-147	FB_I	Vbp1
Maff	2.90033e-151	0.897599	0.136	0.062	5.73308e-147	FB_I	Maff
Itga5	3.07718e-151	0.411338	0.344	0.218	6.08266e-147	FB_I	Itga5
Vegfc	3.43959e-151	-1.32315	0.17	0.267	6.79903e-147	FB_I	Vegfc
Gclm	3.54738e-151	0.778937	0.147	0.067	7.0121e-147	FB_I	Gclm
Mrps18c	4.16014e-151	0.815887	0.144	0.07	8.22334e-147	FB_I	Mrps18c
Rasa3	5.05208e-151	-0.92682	0.363	0.444	9.98644e-147	FB_I	Rasa3
Adamtsl4	1.01055e-150	0.800136	0.149	0.07	1.99755e-146	FB_I	Adamtsl4
Mpv17	1.13135e-150	0.526544	0.237	0.133	2.23635e-146	FB_I	Mpv17
Thap11	1.83983e-150	1.11083	0.109	0.045	3.63678e-146	FB_I	Thap11
Eapp	1.99129e-150	0.567452	0.195	0.104	3.93618e-146	FB_I	Eapp
Bin1	1.99948e-150	0.518998	0.203	0.112	3.95237e-146	FB_I	Bin1
Dynll2	2.31497e-150	0.790667	0.189	0.098	4.576e-146	FB_I	Dynll2
AI413582	2.86883e-150	1.3583	0.087	0.031	5.67082e-146	FB_I	AI413582
Fat3	3.19954e-150	-2.40749	0.028	0.093	6.32453e-146	FB_I	Fat3
Ube2d3	3.97975e-150	0.245952	0.609	0.439	7.86678e-146	FB_I	Ube2d3
Arhgap26	6.08761e-150	-1.59351	0.05	0.114	1.20334e-145	FB_I	Arhgap26
Ech1	6.85906e-150	0.66675	0.262	0.14	1.35583e-145	FB_I	Ech1
Dnajc19	9.28435e-150	0.345799	0.292	0.178	1.83524e-145	FB_I	Dnajc19
G3bp1	1.21018e-149	0.371376	0.334	0.21	2.39217e-145	FB_I	G3bp1
Srp19	1.54553e-149	0.493353	0.227	0.129	3.05506e-145	FB_I	Srp19
Lbp	1.57002e-149	0.697037	0.137	0.061	3.10345e-145	FB_I	Lbp
Tef	1.7537e-149	-1.11708	0.127	0.217	3.46654e-145	FB_I	Tef
Arhgef12	1.9817e-149	-0.585618	0.565	0.605	3.91722e-145	FB_I	Arhgef12
Csnk2b	2.14856e-149	0.770205	0.159	0.081	4.24705e-145	FB_I	Csnk2b
Egfr	3.73856e-149	-0.738895	0.584	0.613	7.39e-145	FB_I	Egfr
Gtf3a	4.28311e-149	1.04227	0.124	0.055	8.46642e-145	FB_I	Gtf3a
Ptgfrn	7.73931e-149	0.382076	0.264	0.155	1.52983e-144	FB_I	Ptgfrn
Glud1	1.06913e-148	0.306681	0.37	0.239	2.11336e-144	FB_I	Glud1
Atp6v1e1	2.31845e-148	0.496243	0.222	0.126	4.58288e-144	FB_I	Atp6v1e1
Vapa	2.93735e-148	0.248188	0.417	0.276	5.80626e-144	FB_I	Vapa
Psmb10	3.55812e-148	0.801257	0.143	0.07	7.03334e-144	FB_I	Psmb10
Herpud1	3.69819e-148	0.43709	0.306	0.188	7.31021e-144	FB_I	Herpud1
Plekhf1	4.80863e-148	0.738176	0.147	0.07	9.50522e-144	FB_I	Plekhf1
Hivep3	5.74901e-148	-1.06483	0.249	0.343	1.13641e-143	FB_I	Hivep3
Slc39a1	5.92309e-148	0.638897	0.177	0.094	1.17082e-143	FB_I	Slc39a1
Rab3d	6.61926e-148	0.879345	0.123	0.053	1.30843e-143	FB_I	Rab3d
Timm17b	1.00827e-147	0.863637	0.148	0.072	1.99304e-143	FB_I	Timm17b
Kras	1.77248e-147	0.390137	0.335	0.212	3.50365e-143	FB_I	Kras
mt-Nd4l	2.64878e-147	0.634785	0.196	0.105	5.23584e-143	FB_I	mt-Nd4l
Fabp3	2.90127e-147	-1.45517	0.025	0.054	5.73494e-143	FB_I	Fabp3
Vamp7	2.91828e-147	0.733206	0.146	0.07	5.76855e-143	FB_I	Vamp7
Ntan1	4.09691e-147	0.312437	0.314	0.197	8.09836e-143	FB_I	Ntan1
Ccdc59	4.53223e-147	0.590652	0.203	0.112	8.95887e-143	FB_I	Ccdc59
Cebpg	6.50207e-147	0.402132	0.276	0.166	1.28526e-142	FB_I	Cebpg
Kansl1	8.77771e-147	-0.594787	0.567	0.609	1.73509e-142	FB_I	Kansl1
Pop5	2.57545e-146	0.758117	0.131	0.059	5.09089e-142	FB_I	Pop5
Me3	2.7549e-146	-2.22127	0.038	0.098	5.4456e-142	FB_I	Me3
Ngf	2.94013e-146	-0.836877	0.504	0.55	5.81175e-142	FB_I	Ngf
Tor2a	3.22901e-146	0.955969	0.133	0.061	6.38278e-142	FB_I	Tor2a
U2af1l4	4.39738e-146	0.941081	0.12	0.053	8.6923e-142	FB_I	U2af1l4
Cdh13	4.98717e-146	-2.70683	0.032	0.093	9.85814e-142	FB_I	Cdh13
Phf5a	6.6022e-146	0.73208	0.158	0.081	1.30506e-141	FB_I	Phf5a
Scoc	6.85441e-146	0.680337	0.165	0.085	1.35491e-141	FB_I	Scoc
BC005624	9.87904e-146	0.508253	0.21	0.117	1.95279e-141	FB_I	BC005624
Ncbp2	1.04502e-145	0.726077	0.156	0.078	2.06569e-141	FB_I	Ncbp2
Rapgef2	1.48643e-145	-0.882235	0.343	0.421	2.93824e-141	FB_I	Rapgef2
Cbr3	1.51829e-145	0.90152	0.112	0.047	3.0012e-141	FB_I	Cbr3
Cmpk1	2.3713e-145	0.367195	0.269	0.164	4.68735e-141	FB_I	Cmpk1
Pdrg1	3.35608e-145	0.762604	0.168	0.086	6.63397e-141	FB_I	Pdrg1
Ndufa10	3.66124e-145	0.550274	0.248	0.137	7.23716e-141	FB_I	Ndufa10
Srgap2	3.76416e-145	-0.753816	0.379	0.461	7.44062e-141	FB_I	Srgap2
Tmx2	5.02701e-145	1.01186	0.117	0.05	9.93688e-141	FB_I	Tmx2
Pak1ip1	5.28944e-145	0.722882	0.148	0.072	1.04556e-140	FB_I	Pak1ip1
Gps2	7.13156e-145	0.626917	0.192	0.105	1.4097e-140	FB_I	Gps2
Copb2	7.80113e-145	0.436613	0.27	0.164	1.54205e-140	FB_I	Copb2
Rbbp7	8.31701e-145	0.412016	0.269	0.163	1.64402e-140	FB_I	Rbbp7
Galnt16	1.6978e-144	0.811113	0.177	0.092	3.35605e-140	FB_I	Galnt16
Inhba	1.95056e-144	1.09566	0.111	0.046	3.85568e-140	FB_I	Inhba
Gtf3c6	2.2264e-144	0.951455	0.116	0.05	4.40093e-140	FB_I	Gtf3c6
Ms4a4d	4.05663e-144	0.234037	0.501	0.341	8.01875e-140	FB_I	Ms4a4d
Pja1	4.45851e-144	0.639171	0.17	0.088	8.81315e-140	FB_I	Pja1
Ccdc127	6.20365e-144	0.727724	0.169	0.086	1.22628e-139	FB_I	Ccdc127
Hspa13	7.33408e-144	0.955581	0.125	0.056	1.44973e-139	FB_I	Hspa13
Itpripl2	7.46543e-144	0.404788	0.254	0.149	1.47569e-139	FB_I	Itpripl2
Sec11c	1.20775e-143	0.78809	0.154	0.078	2.38735e-139	FB_I	Sec11c
Gar1	1.21493e-143	0.946842	0.131	0.061	2.40154e-139	FB_I	Gar1
Ksr1	1.35187e-143	-0.895415	0.293	0.386	2.67223e-139	FB_I	Ksr1
Adra1a	1.63143e-143	-3.30033	0.01	0.049	3.22484e-139	FB_I	Adra1a
Mdp1	1.991e-143	0.846127	0.13	0.061	3.93561e-139	FB_I	Mdp1
Pqbp1	2.17193e-143	0.793703	0.129	0.059	4.29326e-139	FB_I	Pqbp1
Tpgs1	2.87028e-143	0.871335	0.13	0.06	5.67369e-139	FB_I	Tpgs1
Idh1	3.74992e-143	0.554987	0.197	0.106	7.41247e-139	FB_I	Idh1
Twf1	4.19845e-143	0.776493	0.16	0.08	8.29908e-139	FB_I	Twf1
Polr1c	5.86235e-143	0.857128	0.134	0.063	1.15881e-138	FB_I	Polr1c
Ybx3	8.32292e-143	0.341861	0.312	0.194	1.64519e-138	FB_I	Ybx3
Cacna1d	9.07629e-143	-1.48446	0.085	0.17	1.79411e-138	FB_I	Cacna1d
Nudt9	9.63644e-143	0.633142	0.17	0.089	1.90483e-138	FB_I	Nudt9
Nfe2l1	2.62168e-142	0.505167	0.226	0.128	5.18227e-138	FB_I	Nfe2l1
AI314180	2.72481e-142	-1.06805	0.089	0.178	5.38613e-138	FB_I	AI314180
Paics	3.4987e-142	0.628677	0.182	0.096	6.91588e-138	FB_I	Paics
Trappc3	4.90501e-142	0.578913	0.207	0.115	9.69574e-138	FB_I	Trappc3
Mrpl28	5.57215e-142	0.919139	0.158	0.077	1.10145e-137	FB_I	Mrpl28
Iah1	6.27399e-142	0.40701	0.254	0.153	1.24018e-137	FB_I	Iah1
S1pr2	6.41129e-142	0.677678	0.162	0.081	1.26732e-137	FB_I	S1pr2
Commd8	6.57746e-142	0.786214	0.138	0.068	1.30017e-137	FB_I	Commd8
Trim35	1.09479e-141	0.352628	0.297	0.183	2.16406e-137	FB_I	Trim35
Rab34	1.23199e-141	0.497368	0.24	0.141	2.43528e-137	FB_I	Rab34
Actn2	1.6966e-141	-1.77554	0.022	0.057	3.35367e-137	FB_I	Actn2
Zcchc11	2.16149e-141	-1.18028	0.078	0.163	4.27261e-137	FB_I	Zcchc11
Abhd17a	2.49778e-141	0.733213	0.152	0.076	4.93736e-137	FB_I	Abhd17a
Pnkd	2.78553e-141	0.501201	0.213	0.12	5.50616e-137	FB_I	Pnkd
Foxp1	4.06153e-141	-0.718846	0.452	0.508	8.02843e-137	FB_I	Foxp1
Ppp1r35	4.53095e-141	1.067	0.101	0.04	8.95632e-137	FB_I	Ppp1r35
Abhd16a	7.68402e-141	0.432835	0.233	0.136	1.5189e-136	FB_I	Abhd16a
Mrpl24	1.09052e-140	0.540357	0.208	0.117	2.15563e-136	FB_I	Mrpl24
Uvrag	1.09053e-140	-0.882155	0.3	0.388	2.15566e-136	FB_I	Uvrag
Ston2	1.10411e-140	0.439572	0.318	0.197	2.1825e-136	FB_I	Ston2
Rab3il1	1.49282e-140	0.572333	0.152	0.076	2.95086e-136	FB_I	Rab3il1
Pon2	1.74697e-140	0.367206	0.262	0.156	3.45323e-136	FB_I	Pon2
Pfkp	2.55801e-140	0.389254	0.236	0.135	5.05642e-136	FB_I	Pfkp
Samm50	2.99208e-140	0.844815	0.162	0.077	5.91445e-136	FB_I	Samm50
Pink1	3.1152e-140	0.51553	0.205	0.107	6.15782e-136	FB_I	Pink1
Kirrel	3.51428e-140	-0.903473	0.274	0.367	6.94667e-136	FB_I	Kirrel
Dact2	4.35227e-140	2.02694	0.054	0.013	8.60314e-136	FB_I	Dact2
Jagn1	4.50688e-140	0.863922	0.133	0.063	8.90876e-136	FB_I	Jagn1
Plcxd3	4.67977e-140	0.989808	0.136	0.064	9.25051e-136	FB_I	Plcxd3
Flot1	1.11448e-139	0.570081	0.19	0.101	2.20299e-135	FB_I	Flot1
Gli3	1.38229e-139	-0.719889	0.363	0.456	2.73238e-135	FB_I	Gli3
Mrpl43	1.4522e-139	0.806942	0.143	0.07	2.87056e-135	FB_I	Mrpl43
Anks1b	1.87996e-139	-1.47508	0.11	0.197	3.71612e-135	FB_I	Anks1b
Il3ra	2.53465e-139	0.903158	0.122	0.056	5.01023e-135	FB_I	Il3ra
Tm9sf3	3.69018e-139	0.275343	0.428	0.289	7.29438e-135	FB_I	Tm9sf3
Tcn2	4.49711e-139	0.706514	0.152	0.075	8.88945e-135	FB_I	Tcn2
Sept7	5.07569e-139	0.256379	0.58	0.424	1.00331e-134	FB_I	Sept7
Tnfrsf12a	8.05563e-139	1.01091	0.126	0.059	1.59236e-134	FB_I	Tnfrsf12a
Sf3b4	1.18675e-138	0.963872	0.123	0.056	2.34585e-134	FB_I	Sf3b4
Ifitm1	1.22894e-138	1.63583	0.08	0.028	2.42925e-134	FB_I	Ifitm1
Naa50	1.53303e-138	0.511424	0.225	0.128	3.03034e-134	FB_I	Naa50
Mllt3	1.56058e-138	-0.983256	0.238	0.331	3.0848e-134	FB_I	Mllt3
Runx2	1.8724e-138	-1.18759	0.155	0.248	3.70118e-134	FB_I	Runx2
Slc50a1	2.33224e-138	0.320477	0.313	0.197	4.61014e-134	FB_I	Slc50a1
Pfdn4	2.40507e-138	0.804625	0.137	0.068	4.75411e-134	FB_I	Pfdn4
Lamp2	2.49839e-138	0.253601	0.553	0.397	4.93857e-134	FB_I	Lamp2
Sdf2	3.43117e-138	0.365329	0.284	0.174	6.7824e-134	FB_I	Sdf2
Dync1i2	3.69524e-138	0.245505	0.469	0.322	7.30438e-134	FB_I	Dync1i2
Cox6a2	6.93254e-138	-1.65142	0.033	0.08	1.37036e-133	FB_I	Cox6a2
Lgi4	7.14574e-138	1.27808	0.072	0.023	1.4125e-133	FB_I	Lgi4
Cxcl1	8.12075e-138	1.23508	0.244	0.154	1.60523e-133	FB_I	Cxcl1
Polr2l	8.15138e-138	0.800022	0.161	0.084	1.61128e-133	FB_I	Polr2l
Tox	8.43501e-138	-1.61306	0.078	0.159	1.66735e-133	FB_I	Tox
Gnpnat1	1.08999e-137	0.786111	0.146	0.073	2.15459e-133	FB_I	Gnpnat1
Vdac1	1.12737e-137	0.467239	0.255	0.146	2.22848e-133	FB_I	Vdac1
Rhobtb1	1.13181e-137	-1.43951	0.082	0.149	2.23724e-133	FB_I	Rhobtb1
Mycbp2	1.33472e-137	-0.63647	0.514	0.564	2.63835e-133	FB_I	Mycbp2
H2-K1	1.40001e-137	0.292464	0.368	0.239	2.7674e-133	FB_I	H2-K1
Ccl11	1.5667e-137	1.50265	0.089	0.033	3.0969e-133	FB_I	Ccl11
Chp1	1.62018e-137	0.336719	0.281	0.171	3.20262e-133	FB_I	Chp1
Dip2c	2.09389e-137	-0.664572	0.461	0.508	4.13898e-133	FB_I	Dip2c
Ndufs3	2.23104e-137	0.578604	0.224	0.121	4.4101e-133	FB_I	Ndufs3
Ado	2.34942e-137	0.867396	0.125	0.057	4.6441e-133	FB_I	Ado
Exoc4	6.42879e-137	-0.549254	0.566	0.607	1.27078e-132	FB_I	Exoc4
Trip10	1.20343e-136	0.360259	0.255	0.149	2.37881e-132	FB_I	Trip10
Nsmce1	1.20627e-136	0.662614	0.147	0.073	2.38443e-132	FB_I	Nsmce1
Gm26883	1.39152e-136	-1.42603	0.052	0.127	2.75062e-132	FB_I	Gm26883
Snrpa	2.47278e-136	0.617752	0.171	0.091	4.88795e-132	FB_I	Snrpa
Tns3	4.42346e-136	-1.20695	0.173	0.265	8.74385e-132	FB_I	Tns3
Ube2d2a	4.91634e-136	0.230896	0.45	0.308	9.71814e-132	FB_I	Ube2d2a
Nol12	5.78673e-136	0.784532	0.126	0.06	1.14386e-131	FB_I	Nol12
Prdx6	9.21523e-136	0.363756	0.248	0.148	1.82157e-131	FB_I	Prdx6
1110008P14Rik	1.104e-135	1.00684	0.114	0.053	2.18229e-131	FB_I	1110008P14Rik
Pgd	1.10904e-135	0.815426	0.115	0.052	2.19224e-131	FB_I	Pgd
mt-Atp8	1.11626e-135	0.682377	0.164	0.084	2.20651e-131	FB_I	mt-Atp8
Vps36	1.21653e-135	0.488162	0.206	0.115	2.40471e-131	FB_I	Vps36
Map2	1.52917e-135	-1.38459	0.099	0.183	3.02271e-131	FB_I	Map2
Trappc1	1.69427e-135	0.832674	0.123	0.059	3.34906e-131	FB_I	Trappc1
Chmp2b	1.86725e-135	0.69018	0.157	0.082	3.69099e-131	FB_I	Chmp2b
Eps8	2.20323e-135	-0.979457	0.264	0.355	4.35513e-131	FB_I	Eps8
Creb3	2.23647e-135	0.729409	0.148	0.075	4.42084e-131	FB_I	Creb3
Fam208a	2.49676e-135	-1.12718	0.08	0.164	4.93535e-131	FB_I	Fam208a
2210016L21Rik	3.97701e-135	0.784943	0.141	0.069	7.86135e-131	FB_I	2210016L21Rik
M6pr	4.41977e-135	0.596449	0.162	0.084	8.73657e-131	FB_I	M6pr
Rnf10	4.64878e-135	0.354924	0.307	0.195	9.18924e-131	FB_I	Rnf10
S100a4	5.04218e-135	0.775719	0.103	0.049	9.96687e-131	FB_I	S100a4
Sncaip	6.00582e-135	-2.43553	0.018	0.072	1.18717e-130	FB_I	Sncaip
Rcan1	6.03424e-135	0.951397	0.105	0.046	1.19279e-130	FB_I	Rcan1
Eif2s1	6.09295e-135	0.503814	0.207	0.118	1.20439e-130	FB_I	Eif2s1
Efhd2	6.43958e-135	0.842707	0.108	0.049	1.27291e-130	FB_I	Efhd2
0610009B22Rik	6.79271e-135	1.02202	0.105	0.045	1.34271e-130	FB_I	0610009B22Rik
Prpf19	7.62547e-135	0.754055	0.153	0.074	1.50733e-130	FB_I	Prpf19
Stt3a	7.9243e-135	0.37912	0.296	0.187	1.5664e-130	FB_I	Stt3a
Oser1	9.01263e-135	0.717357	0.159	0.083	1.78153e-130	FB_I	Oser1
Nono	1.09888e-134	0.366668	0.273	0.169	2.17215e-130	FB_I	Nono
Srpr	1.1391e-134	0.326868	0.312	0.197	2.25166e-130	FB_I	Srpr
Bcas3	1.62147e-134	-0.744198	0.43	0.496	3.20515e-130	FB_I	Bcas3
Fcf1	1.75539e-134	0.596972	0.177	0.096	3.46989e-130	FB_I	Fcf1
Cmklr1	1.98343e-134	0.1943	0.361	0.229	3.92064e-130	FB_I	Cmklr1
Radil	2.28517e-134	0.645581	0.154	0.076	4.51709e-130	FB_I	Radil
Rab8a	3.71926e-134	0.707344	0.143	0.071	7.35185e-130	FB_I	Rab8a
Eny2	5.39268e-134	0.390655	0.254	0.156	1.06597e-129	FB_I	Eny2
Rtkn	5.48521e-134	0.652414	0.149	0.075	1.08426e-129	FB_I	Rtkn
Map4k3	6.76024e-134	-1.02032	0.191	0.28	1.3363e-129	FB_I	Map4k3
Il1r1	7.9881e-134	-0.813587	0.359	0.44	1.57901e-129	FB_I	Il1r1
Lsm3	8.43223e-134	0.834155	0.135	0.066	1.6668e-129	FB_I	Lsm3
Fgf18	9.28874e-134	1.6085	0.062	0.018	1.83611e-129	FB_I	Fgf18
Ier2	2.32887e-133	0.647698	0.502	0.384	4.60349e-129	FB_I	Ier2
Adamtsl5	2.67152e-133	0.539457	0.218	0.123	5.28079e-129	FB_I	Adamtsl5
Ppp2r1a	2.83571e-133	0.501076	0.205	0.115	5.60534e-129	FB_I	Ppp2r1a
Fgfr1op2	3.09734e-133	0.320702	0.327	0.209	6.12251e-129	FB_I	Fgfr1op2
Rtcb	4.3755e-133	0.453442	0.196	0.11	8.64906e-129	FB_I	Rtcb
Mtch2	4.43508e-133	0.357859	0.26	0.156	8.76682e-129	FB_I	Mtch2
Lmo7	4.45491e-133	-2.17719	0.023	0.074	8.80602e-129	FB_I	Lmo7
Peak1	4.61477e-133	-0.607306	0.565	0.601	9.12201e-129	FB_I	Peak1
Ust	5.18478e-133	-0.658903	0.442	0.514	1.02488e-128	FB_I	Ust
March2	6.24487e-133	0.306285	0.272	0.165	1.23442e-128	FB_I	March2
Fbl	6.87061e-133	0.502842	0.182	0.101	1.35811e-128	FB_I	Fbl
Ddit3	7.03443e-133	0.582323	0.187	0.101	1.39049e-128	FB_I	Ddit3
Abhd8	1.32019e-132	0.884124	0.124	0.058	2.60963e-128	FB_I	Abhd8
2210016F16Rik	1.52567e-132	0.803892	0.129	0.061	3.01578e-128	FB_I	2210016F16Rik
Pde1c	1.61708e-132	-1.61626	0.052	0.107	3.19648e-128	FB_I	Pde1c
Map7d1	1.79511e-132	0.505248	0.226	0.126	3.5484e-128	FB_I	Map7d1
Plekho2	1.99495e-132	0.476905	0.205	0.115	3.94342e-128	FB_I	Plekho2
Upf3a	5.80004e-132	0.683699	0.146	0.074	1.14649e-127	FB_I	Upf3a
Ifnar2	8.99186e-132	0.289534	0.323	0.208	1.77742e-127	FB_I	Ifnar2
Mtpn	1.0685e-131	0.382331	0.244	0.148	2.1121e-127	FB_I	Mtpn
Mettl9	1.20122e-131	0.446927	0.244	0.143	2.37445e-127	FB_I	Mettl9
Cuedc2	1.22169e-131	0.679926	0.158	0.083	2.41491e-127	FB_I	Cuedc2
Lars2	1.27575e-131	-0.961364	0.169	0.244	2.52177e-127	FB_I	Lars2
Idi1	1.475e-131	1.9036	0.057	0.015	2.91563e-127	FB_I	Idi1
Ddt	1.55742e-131	1.06355	0.119	0.054	3.07855e-127	FB_I	Ddt
Cyth2	2.54271e-131	0.834913	0.122	0.056	5.02618e-127	FB_I	Cyth2
Mrpl40	3.73299e-131	0.853382	0.134	0.066	7.379e-127	FB_I	Mrpl40
Gprc5b	4.70632e-131	0.640009	0.141	0.069	9.30299e-127	FB_I	Gprc5b
Sar1b	5.05711e-131	0.397344	0.218	0.126	9.99638e-127	FB_I	Sar1b
Mid1ip1	6.22336e-131	1.02162	0.11	0.048	1.23017e-126	FB_I	Mid1ip1
Eif3j2	6.75674e-131	1.28854	0.106	0.046	1.33561e-126	FB_I	Eif3j2
Adgrl3	7.96826e-131	-1.06069	0.333	0.404	1.57509e-126	FB_I	Adgrl3
Tbcc	1.1614e-130	1.06674	0.089	0.034	2.29574e-126	FB_I	Tbcc
Sod1	1.38778e-130	0.421737	0.223	0.125	2.74322e-126	FB_I	Sod1
Aarsd1	1.64135e-130	0.737939	0.131	0.062	3.24446e-126	FB_I	Aarsd1
Copz1	1.78293e-130	0.356825	0.257	0.156	3.52432e-126	FB_I	Copz1
Diablo	1.89528e-130	0.435911	0.195	0.109	3.7464e-126	FB_I	Diablo
Hand2	2.3642e-130	0.835658	0.134	0.065	4.67331e-126	FB_I	Hand2
Cnpy4	2.65184e-130	1.10751	0.098	0.041	5.2419e-126	FB_I	Cnpy4
Crlf1	2.82194e-130	1.09483	0.118	0.056	5.57813e-126	FB_I	Crlf1
Ube2m	2.89576e-130	0.697351	0.158	0.081	5.72406e-126	FB_I	Ube2m
Klf10	3.05382e-130	0.442216	0.201	0.113	6.03649e-126	FB_I	Klf10
Tubb2b	3.10951e-130	1.33964	0.088	0.035	6.14658e-126	FB_I	Tubb2b
Snapin	3.34061e-130	0.549143	0.177	0.096	6.60339e-126	FB_I	Snapin
Pde10a	3.72169e-130	0.807989	0.293	0.188	7.35667e-126	FB_I	Pde10a
Tmem115	4.93153e-130	0.901913	0.109	0.048	9.74815e-126	FB_I	Tmem115
Med31	5.45528e-130	0.795765	0.117	0.053	1.07834e-125	FB_I	Med31
Pcna	7.79468e-130	0.846706	0.122	0.057	1.54077e-125	FB_I	Pcna
Cadm1	1.00044e-129	-3.78576	0.005	0.047	1.97757e-125	FB_I	Cadm1
Bcl2	1.08889e-129	-0.965616	0.306	0.386	2.15241e-125	FB_I	Bcl2
Flt1	1.30813e-129	-3.33386	0.016	0.074	2.58578e-125	FB_I	Flt1
Gcsh	1.46217e-129	0.920381	0.139	0.069	2.89027e-125	FB_I	Gcsh
4833439L19Rik	1.66057e-129	0.557279	0.167	0.088	3.28245e-125	FB_I	4833439L19Rik
Cdkn2d	1.89612e-129	1.2292	0.087	0.034	3.74807e-125	FB_I	Cdkn2d
Psmb7	1.90463e-129	0.384739	0.246	0.152	3.76487e-125	FB_I	Psmb7
Kctd17	1.96256e-129	0.640419	0.159	0.083	3.8794e-125	FB_I	Kctd17
Gpr108	3.15489e-129	0.514353	0.173	0.093	6.23626e-125	FB_I	Gpr108
Lrrtm3	3.45158e-129	-2.08517	0.024	0.067	6.82274e-125	FB_I	Lrrtm3
Ube2l6	4.32465e-129	0.867158	0.114	0.052	8.54854e-125	FB_I	Ube2l6
Nnmt	4.81885e-129	0.428703	0.225	0.133	9.52541e-125	FB_I	Nnmt
Mrps7	5.12947e-129	0.683823	0.146	0.073	1.01394e-124	FB_I	Mrps7
Stk16	7.1502e-129	0.626864	0.163	0.085	1.41338e-124	FB_I	Stk16
Smco4	9.99181e-129	0.527658	0.175	0.096	1.97508e-124	FB_I	Smco4
Suds3	1.09347e-128	0.429973	0.209	0.118	2.16146e-124	FB_I	Suds3
Reep3	1.13241e-128	0.268966	0.364	0.24	2.23843e-124	FB_I	Reep3
Mcrs1	1.47827e-128	0.831945	0.133	0.063	2.9221e-124	FB_I	Mcrs1
Malat1	2.48736e-128	-0.167938	0.999	0.998	4.91676e-124	FB_I	Malat1
Gtf2a2	3.51801e-128	0.338706	0.279	0.177	6.95404e-124	FB_I	Gtf2a2
Sypl	3.77455e-128	0.378174	0.241	0.145	7.46115e-124	FB_I	Sypl
Epb41	5.55163e-128	-2.05657	0.029	0.081	1.09739e-123	FB_I	Epb41
Kmt2c	7.04037e-128	-0.631614	0.371	0.451	1.39167e-123	FB_I	Kmt2c
Bag3	7.09985e-128	0.74889	0.29	0.183	1.40343e-123	FB_I	Bag3
Tm2d3	1.80567e-127	0.798686	0.127	0.061	3.56927e-123	FB_I	Tm2d3
Stoml2	2.62649e-127	0.68868	0.143	0.071	5.19179e-123	FB_I	Stoml2
Sdhaf4	4.92564e-127	0.976226	0.118	0.055	9.73652e-123	FB_I	Sdhaf4
Imp3	5.72966e-127	0.503614	0.194	0.109	1.13258e-122	FB_I	Imp3
Psmc6	6.63031e-127	0.322723	0.285	0.18	1.31061e-122	FB_I	Psmc6
Ntn1	1.01275e-126	0.248226	0.347	0.219	2.0019e-122	FB_I	Ntn1
Isoc1	1.12534e-126	0.80889	0.138	0.067	2.22445e-122	FB_I	Isoc1
Hes1	1.48572e-126	0.235181	0.336	0.219	2.93682e-122	FB_I	Hes1
Cry1	1.78573e-126	0.987523	0.092	0.036	3.52985e-122	FB_I	Cry1
Aida	1.92897e-126	0.303658	0.272	0.168	3.813e-122	FB_I	Aida
Tm9sf1	2.29642e-126	0.540333	0.174	0.095	4.53933e-122	FB_I	Tm9sf1
Crebbp	3.29653e-126	-0.669328	0.467	0.524	6.51626e-122	FB_I	Crebbp
Lage3	3.94145e-126	0.716808	0.154	0.082	7.79107e-122	FB_I	Lage3
Tmbim4	3.98079e-126	0.373046	0.23	0.139	7.86883e-122	FB_I	Tmbim4
Med13l	4.27836e-126	-0.775655	0.338	0.419	8.45703e-122	FB_I	Med13l
Arhgap28	4.5835e-126	-1.22748	0.126	0.212	9.0602e-122	FB_I	Arhgap28
Orai3	4.93222e-126	1.02621	0.104	0.045	9.74952e-122	FB_I	Orai3
Dnal4	5.10307e-126	1.10173	0.098	0.041	1.00872e-121	FB_I	Dnal4
H2-T22	5.55912e-126	0.44674	0.175	0.096	1.09887e-121	FB_I	H2-T22
Syngr2	7.1234e-126	0.949966	0.113	0.052	1.40808e-121	FB_I	Syngr2
Icam1	7.20733e-126	0.546766	0.168	0.091	1.42467e-121	FB_I	Icam1
Exoc6b	7.60655e-126	-0.608524	0.463	0.525	1.50359e-121	FB_I	Exoc6b
Palm	8.74425e-126	0.275101	0.366	0.242	1.72848e-121	FB_I	Palm
Srprb	9.9328e-126	0.677117	0.149	0.076	1.96342e-121	FB_I	Srprb
Trps1	1.09812e-125	-0.370823	0.759	0.764	2.17065e-121	FB_I	Trps1
Cisd3	1.46494e-125	1.03964	0.108	0.047	2.89574e-121	FB_I	Cisd3
Ndufaf3	1.47075e-125	1.1112	0.094	0.039	2.90723e-121	FB_I	Ndufaf3
Lasp1	1.63589e-125	0.297596	0.279	0.175	3.23367e-121	FB_I	Lasp1
Puf60	2.63898e-125	0.498824	0.19	0.109	5.21647e-121	FB_I	Puf60
Arhgdib	2.72515e-125	0.701195	0.148	0.08	5.3868e-121	FB_I	Arhgdib
Ntf3	3.98693e-125	-1.90645	0.038	0.1	7.88097e-121	FB_I	Ntf3
Tmed5	4.0451e-125	0.455637	0.2	0.114	7.99595e-121	FB_I	Tmed5
Dnm3os	4.21942e-125	-1.07006	0.125	0.212	8.34054e-121	FB_I	Dnm3os
Nsd1	4.29392e-125	-0.611837	0.448	0.512	8.4878e-121	FB_I	Nsd1
Thbs3	5.43461e-125	0.459531	0.189	0.106	1.07426e-120	FB_I	Thbs3
Plec	8.08175e-125	0.642301	0.17	0.091	1.59752e-120	FB_I	Plec
Pawr	1.05991e-124	-2.43242	0.016	0.067	2.09512e-120	FB_I	Pawr
Sertad1	1.3749e-124	0.968892	0.104	0.049	2.71776e-120	FB_I	Sertad1
Pan3	1.52618e-124	-0.687217	0.4	0.468	3.0168e-120	FB_I	Pan3
Igf2r	1.54844e-124	-0.748272	0.385	0.458	3.06081e-120	FB_I	Igf2r
Hmgcs1	1.7188e-124	0.830071	0.129	0.062	3.39756e-120	FB_I	Hmgcs1
Maged1	1.92672e-124	0.324637	0.274	0.171	3.80855e-120	FB_I	Maged1
Eif4b	3.2271e-124	0.374068	0.243	0.149	6.37901e-120	FB_I	Eif4b
Myc	3.9054e-124	1.67013	0.075	0.027	7.7198e-120	FB_I	Myc
Rnft1	4.44562e-124	0.385147	0.239	0.145	8.78766e-120	FB_I	Rnft1
Prrt4	4.46567e-124	1.91101	0.039	0.008	8.82728e-120	FB_I	Prrt4
Dach1	4.60106e-124	-3.15404	0.017	0.071	9.09492e-120	FB_I	Dach1
Trdn	6.23574e-124	-1.73186	0.024	0.06	1.23262e-119	FB_I	Trdn
Diaph1	8.87343e-124	0.379177	0.274	0.17	1.75401e-119	FB_I	Diaph1
Clns1a	1.03768e-123	0.599083	0.153	0.08	2.05119e-119	FB_I	Clns1a
Map1b	1.54019e-123	0.22674	0.309	0.198	3.04449e-119	FB_I	Map1b
Gnptg	1.67246e-123	0.818895	0.115	0.052	3.30596e-119	FB_I	Gnptg
Ak6	2.34046e-123	0.568728	0.134	0.067	4.62639e-119	FB_I	Ak6
Tgfb1i1	2.35095e-123	0.3204	0.286	0.183	4.64712e-119	FB_I	Tgfb1i1
Smim19	4.65671e-123	0.616372	0.189	0.106	9.20492e-119	FB_I	Smim19
Gpcpd1	4.68276e-123	-0.981213	0.207	0.264	9.25641e-119	FB_I	Gpcpd1
Grm1	7.16883e-123	-2.02524	0.023	0.067	1.41706e-118	FB_I	Grm1
Msmo1	7.83105e-123	0.893085	0.097	0.041	1.54796e-118	FB_I	Msmo1
Lgmn	8.12986e-123	0.65315	0.149	0.083	1.60703e-118	FB_I	Lgmn
Fosb	9.29843e-123	0.647114	0.198	0.116	1.83802e-118	FB_I	Fosb
Acot9	1.48596e-122	0.332532	0.234	0.141	2.93729e-118	FB_I	Acot9
Dohh	1.61642e-122	0.93309	0.107	0.049	3.19518e-118	FB_I	Dohh
Zmat5	2.19993e-122	0.607507	0.151	0.079	4.34859e-118	FB_I	Zmat5
Cnn3	2.58339e-122	0.235643	0.365	0.244	5.10659e-118	FB_I	Cnn3
Lgals9	3.4657e-122	0.443242	0.165	0.089	6.85066e-118	FB_I	Lgals9
Ankrd17	4.73e-122	-0.659464	0.409	0.474	9.3498e-118	FB_I	Ankrd17
Ei24	4.9854e-122	0.431038	0.201	0.116	9.85464e-118	FB_I	Ei24
Ube2l3	7.02909e-122	0.302905	0.271	0.171	1.38944e-117	FB_I	Ube2l3
Phldb2	8.47841e-122	-1.10068	0.139	0.224	1.67593e-117	FB_I	Phldb2
Atp1b3	1.11453e-121	0.322039	0.253	0.158	2.20309e-117	FB_I	Atp1b3
Ino80c	1.78047e-121	0.98644	0.091	0.037	3.51946e-117	FB_I	Ino80c
Krt10	2.0572e-121	1.0562	0.091	0.037	4.06646e-117	FB_I	Krt10
Rrp7a	2.3588e-121	0.818759	0.123	0.06	4.66264e-117	FB_I	Rrp7a
Lsm1	4.29104e-121	0.547024	0.163	0.088	8.48209e-117	FB_I	Lsm1
Fundc1	4.3479e-121	0.585083	0.155	0.083	8.5945e-117	FB_I	Fundc1
Itih5	4.90812e-121	0.199272	0.274	0.169	9.70187e-117	FB_I	Itih5
Bloc1s4	7.46699e-121	1.02596	0.096	0.041	1.476e-116	FB_I	Bloc1s4
Lsm10	1.39213e-120	1.07298	0.091	0.038	2.75183e-116	FB_I	Lsm10
Aif1l	1.72146e-120	2.2322	0.031	0.004	3.40281e-116	FB_I	Aif1l
Scpep1	1.7419e-120	0.452483	0.194	0.111	3.44321e-116	FB_I	Scpep1
Itga1	1.80254e-120	-1.32609	0.127	0.203	3.56308e-116	FB_I	Itga1
Cyyr1	3.66387e-120	-3.36382	0.012	0.065	7.24237e-116	FB_I	Cyyr1
Naa10	5.11912e-120	0.970245	0.107	0.048	1.0119e-115	FB_I	Naa10
[truncated: 50,344 more rows]
