# Supplementary material for: Cardiorenal heart failure with preserved ejection fraction is caused by a reversible rise of mineralocorticoid-induced fibroblast subtypes
Source: Research Square preprint supplement (doi:10.21203/rs.3.rs-7039115/v1), 2025-07-14
Supplement: Supplementary file 5 [file 3387354b0c5349e783191604.xlsx]

## Sheet: DEGs CTRL ALDO REC
	CM												FB												EC-cap												EC-end												EC-art
	ALDO vs. CTRL				REC vs. ALDO				REC vs. CTRL				ALDO vs. CTRL				REC vs. ALDO				REC vs. CTRL				ALDO vs. CTRL				REC vs. ALDO				REC vs. CTRL				ALDO vs. CTRL				REC vs. ALDO				REC vs. CTRL				ALDO vs. CTRL
Genes	avg_log2FC	pct.1	pct.2	p_val_adj	avg_log2FC	pct.1	pct.2	p_val_adj	avg_log2FC	pct.1	pct.2	p_val_adj	avg_log2FC	pct.1	pct.2	p_val_adj	avg_log2FC	pct.1	pct.2	p_val_adj	avg_log2FC	pct.1	pct.2	p_val_adj	avg_log2FC	pct.1	pct.2	p_val_adj	avg_log2FC	pct.1	pct.2	p_val_adj	avg_log2FC	pct.1	pct.2	p_val_adj	avg_log2FC	pct.1	pct.2	p_val_adj	avg_log2FC	pct.1	pct.2	p_val_adj	avg_log2FC	pct.1	pct.2	p_val_adj	avg_log2FC
37135	-0.287288	0.035	0.035	1	0.489431	0.035	0.052	1	0.202143	0.052	0.035	1	0.0782477	0.037	0.03	1	-0.656424	0.037	0.019	1.53e-08	-0.578177	0.019	0.03	9.45e-05	-0.0822362	0.03	0.027	1	-0.529091	0.03	0.013	7.24e-13	-0.611327	0.013	0.027	5.21e-12	0.606341	0.045	0.024	1	0.308148	0.045	0.033	1	0.914489	0.033	0.024	1	-0.943476
37500	0.423539	0.017	0.01	0.00276707	0.543925	0.017	0.029	0.00113451	0.967463	0.029	0.01	1.71e-23	-0.121692	0.031	0.026	1	0.331194	0.031	0.037	1	0.209502	0.037	0.026	1					1.47809	0.008	0.021	0.00119935	1.09788	0.021	0.009	0.00100962	0.263464	0.012	0.017	1	0.0609772	0.012	0.023	1	0.324441	0.023	0.017	1	1.76925
37865
38231													-0.352607	0.098	0.095	1	0.192095	0.098	0.094	1	-0.160512	0.094	0.095	1	-0.210538	0.17	0.162	1	-0.0342334	0.17	0.117	1.73e-11	-0.244772	0.117	0.162	9.33e-11	-0.465348	0.033	0.041	1	1.30389	0.033	0.057	1	0.838542	0.057	0.041	1	-0.09322
38596													0.231801	0.012	0.006	1	-1.12216	0.012	0.004	0.0300218
38961	0.351469	0.044	0.039	1	-0.329593	0.044	0.037	0.196307	0.0218752	0.037	0.039	1	-0.427006	0.065	0.072	1	0.403167	0.065	0.068	1	-0.023839	0.068	0.072	1													0.225485	0.051	0.061	1	-0.103304	0.051	0.042	1	0.122182	0.042	0.061	1	3.98933
39326	-0.0149325	0.277	0.28	1	0.291568	0.277	0.345	6.04e-31	0.276636	0.345	0.28	8.05e-22	-0.000772391	0.361	0.312	1	0.375267	0.361	0.378	1	0.374495	0.378	0.312	3.69e-06	-0.0034379	0.242	0.207	1	0.419627	0.242	0.217	1	0.416189	0.217	0.207	1	-0.411433	0.247	0.303	1	0.487947	0.247	0.255	1	0.0765138	0.255	0.303	1	-0.0342474
39692	-0.025035	0.038	0.047	0.767146	-0.41114	0.038	0.056	0.00618659	-0.436175	0.056	0.047	6.99e-18	-0.00941466	0.403	0.355	1	-0.305514	0.403	0.314	4.08e-14	-0.314929	0.314	0.355	7.96e-08	0.534593	0.067	0.044	1	-0.445548	0.067	0.031	5.64e-34	0.0890444	0.031	0.044	1.48e-17	-1.56633	0.015	0.044	1	1.22731	0.015	0.035	1	-0.339014	0.035	0.044	1	1.46439
40057	0.119127	0.091	0.084	1	-1.27652	0.091	0.044	1.48e-30	-1.1574	0.044	0.084	3.11e-34	-0.241068	0.073	0.069	1	0.243849	0.073	0.07	1	0.00278099	0.07	0.069	1	0.28595	0.268	0.202	8.61e-07	-0.437554	0.268	0.156	1.14e-45	-0.151604	0.156	0.202	3.82e-07	0.0628369	0.179	0.16	1	0.290539	0.179	0.169	1	0.353376	0.169	0.16	1	1.07233
40422	-0.274894	0.069	0.077	0.050908	0.362975	0.069	0.082	1	0.088081	0.082	0.077	1	0.0121665	0.092	0.073	1	0.21081	0.092	0.093	1	0.222977	0.093	0.073	1	0.187006	0.084	0.063	1	0.0744484	0.084	0.056	2.1e-06	0.261455	0.056	0.063	1	0.0655474	0.125	0.085	1	0.324501	0.125	0.09	1	0.390048	0.09	0.085	1	-0.308253
40787													-0.231225	0.538	0.52	1	0.36968	0.538	0.555	1.03e-05	0.138455	0.555	0.52	1	0.0755779	0.218	0.189	1	-0.259498	0.218	0.134	3.07e-28	-0.18392	0.134	0.189	2.06e-13	-0.219808	0.202	0.235	1	0.539986	0.202	0.23	1	0.320178	0.23	0.235	1	-0.353918
41153
41518
41883
A1bg	-0.113307	0.018	0.019	1	1.69194	0.018	0.058	8.46e-60	1.57863	0.058	0.019	7.13e-44													-0.614331	0.007	0.01	1	1.60631	0.007	0.016	0.249409	0.991975	0.016	0.01	1
A1cf
A26c2
A2m																																					2.63088	0.015	0.007	1	1.10489	0.015	0.029	1	3.73577	0.029	0.007	1
A2ml1
A3galt2																																					1.57155	0.015	0.01	1	-1.57171	0.015	0.004	1	-0.000158558	0.004	0.01	1
A4galt													-0.0422639	0.244	0.203	1	-0.499399	0.244	0.168	5.28e-16	-0.541662	0.168	0.203	0.00110185	0.424496	0.043	0.026	1	-0.741158	0.043	0.017	1.35e-18	-0.316662	0.017	0.026	0.00157857	0.104204	0.051	0.044	1	0.630753	0.051	0.057	1	0.734957	0.057	0.044	1	0.605184
A4gnt
AA467197
AA792892
AA986860	0.181755	0.011	0.009	1	0.156162	0.011	0.013	1	0.337918	0.013	0.009	1	0.578446	0.01	0.006	1	-0.300324	0.01	0.007	1																	-2.40653	0.006	0.02	1	1.83426	0.006	0.012	1	-0.57227	0.012	0.02	1	1.75064
Aaas	0.203436	0.039	0.028	1	-0.383856	0.039	0.032	0.00793499	-0.180421	0.032	0.028	1	-0.213172	0.024	0.024	1	-0.330794	0.024	0.016	0.0437475	-0.543966	0.016	0.024	0.114868	0.318165	0.032	0.025	1	-0.668885	0.032	0.016	3.96e-11	-0.350721	0.016	0.025	0.000328851	-0.689579	0.027	0.017	1	0.545555	0.027	0.016	1	-0.144024	0.016	0.017	1	-0.128093
Aacs	0.848845	0.012	0.01	1	-0.479286	0.012	0.013	1	0.369559	0.013	0.01	1	-0.0960991	0.042	0.04	1	-0.508898	0.042	0.027	0.0698794	-0.604997	0.027	0.04	0.189424	0.137735	0.014	0.011	1	-0.395877	0.014	0.008	0.407905	-0.258142	0.008	0.011	1	0.053871	0.018	0.017	1	-2.09536	0.018	0.006	1	-2.04149	0.006	0.017	1	-0.695648
Aadac
Aadacl2
Aadacl3
Aadacl4
Aadat
Aagab	-0.0187644	0.088	0.089	1	-0.187336	0.088	0.082	1	-0.2061	0.082	0.089	0.0118769	-0.486513	0.053	0.052	1	0.173248	0.053	0.046	1	-0.313265	0.046	0.052	1	0.22587	0.042	0.031	1	-0.385612	0.042	0.02	3.1e-17	-0.159742	0.02	0.031	1.61e-06	-0.391289	0.06	0.054	1	0.320531	0.06	0.049	1	-0.070758	0.049	0.054	1	-0.131394
Aak1	-0.196593	0.713	0.742	4.13e-22	0.0270666	0.713	0.765	1	-0.169527	0.765	0.742	1.67e-10	0.0274182	0.307	0.248	1	0.05576	0.307	0.28	0.000302119	0.0831782	0.28	0.248	1	0.166542	0.311	0.252	0.487641	0.140351	0.311	0.257	5.92e-10	0.306893	0.257	0.252	1	-0.238384	0.396	0.398	1	0.295464	0.396	0.396	1	0.0570807	0.396	0.398	1	-0.0203342
Aamdc	0.173495	0.191	0.167	1	-0.357054	0.191	0.155	0.000129801	-0.183559	0.155	0.167	1	0.00610639	0.082	0.074	1	-0.457081	0.082	0.047	6.47e-12	-0.450974	0.047	0.074	2.39e-05	0.034845	0.057	0.047	1	-0.499855	0.057	0.024	2.38e-16	-0.46501	0.024	0.047	3.94e-12	0.0601799	0.054	0.054	1	-0.213214	0.054	0.032	1	-0.153034	0.032	0.054	1	-0.304074
Aamp	1.49282	0.04	0.012	0.00379827	-1.56989	0.04	0.017	3.65e-06	-0.0770712	0.017	0.012	1	-0.245474	0.026	0.029	1	0.165522	0.026	0.026	1	-0.0799513	0.026	0.029	1	0.280181	0.042	0.03	1	0.326394	0.042	0.033	1	0.606576	0.033	0.03	1	-0.841587	0.045	0.034	1	0.111233	0.045	0.032	1	-0.730354	0.032	0.034	1	-0.0423517
Aanat
Aar2	0.199653	0.08	0.066	1	-0.368491	0.08	0.069	1	-0.168838	0.069	0.066	1	0.631119	0.046	0.026	1	-1.19523	0.046	0.019	2.2e-13	-0.564107	0.019	0.026	1	0.147482	0.046	0.035	1	-0.499409	0.046	0.022	4.07e-10	-0.351928	0.022	0.035	0.00451727	0.692807	0.054	0.037	1	-2.42102	0.054	0.01	1	-1.72822	0.01	0.037	1	-0.220009
Aard
Aars	-0.0388353	0.08	0.079	1	-0.115958	0.08	0.08	1	-0.154793	0.08	0.079	1	-0.473719	0.06	0.064	1	0.395439	0.06	0.067	1	-0.07828	0.067	0.064	1	-0.509674	0.025	0.027	1	0.392369	0.025	0.02	1	-0.117305	0.02	0.027	0.0140093	0.153715	0.051	0.034	1	-1.3019	0.051	0.013	1	-1.14818	0.013	0.034	1	0.383138
Aars2	0.090184	0.053	0.05	1	-0.548691	0.053	0.039	1.72e-09	-0.458507	0.039	0.05	5.23e-15	0.89543	0.023	0.012	1	0.0392126	0.023	0.016	0.0888608	0.934642	0.016	0.012	1													0.425541	0.018	0.014	1	0.162587	0.018	0.007	1	0.588128	0.007	0.014	1
Aarsd1	0.213636	0.067	0.053	1	-0.75383	0.067	0.055	1	-0.540193	0.055	0.053	1	0.314098	0.032	0.022	1	-0.321412	0.032	0.026	1	-0.00731407	0.026	0.022	1	0.707204	0.017	0.009	1	-0.096947	0.017	0.017	1	0.610257	0.017	0.009	1	1.66208	0.021	0.007	1	-0.268847	0.021	0.023	1	1.39323	0.023	0.007	1	-1.28059
Aasdh	0.195051	0.287	0.246	5.54e-06	-0.317201	0.287	0.252	9.58e-18	-0.12215	0.252	0.246	1	-0.412305	0.024	0.024	1	0.556812	0.024	0.029	0.00112934	0.144507	0.029	0.024	1	0.177666	0.013	0.008	1	0.250603	0.013	0.011	1.16e-05	0.428269	0.011	0.008	1	0.980366	0.036	0.014	1	-0.417835	0.036	0.025	1	0.562531	0.025	0.014	1	-0.139538
Aasdhppt	0.104447	0.081	0.069	1	-0.377843	0.081	0.061	0.0132673	-0.273396	0.061	0.069	0.630101	-0.610742	0.026	0.032	1	-0.146361	0.026	0.019	1	-0.757102	0.019	0.032	0.00865311	-0.0819887	0.025	0.024	1	-0.332222	0.025	0.013	0.00607264	-0.41421	0.013	0.024	9.59e-09	1.18955	0.08	0.034	1	-1.57809	0.08	0.019	1	-0.388542	0.019	0.034	1	0.679869
Aass													-0.243288	0.059	0.059	1	0.781569	0.059	0.075	1	0.53828	0.075	0.059	1													-0.753134	0.051	0.075	1	0.734762	0.051	0.061	1	-0.0183717	0.061	0.075	1
Aatf	-0.00907101	0.198	0.197	1	0.114865	0.198	0.217	1	0.105794	0.217	0.197	1	-0.146283	0.231	0.198	1	0.145505	0.231	0.213	1	-0.000778151	0.213	0.198	1	-0.479591	0.101	0.114	1	0.501832	0.101	0.094	1	0.0222411	0.094	0.114	0.00335534	-0.484006	0.173	0.17	1	0.594075	0.173	0.173	1	0.110069	0.173	0.17	1	0.106852
Aatk													0.806409	0.012	0.006	1	0.424148	0.012	0.012	1	1.23056	0.012	0.006	1	0.617169	0.015	0.01	1	-0.527697	0.015	0.007	0.0470869	0.089472	0.007	0.01	1	0.00764453	0.027	0.024	1	-0.619264	0.027	0.012	1	-0.61162	0.012	0.024	1	0.703935
AB124611	0.681824	0.011	0.005	1	0.764594	0.011	0.023	1.4e-06	1.44642	0.023	0.005	2.02e-17																									-1.38632	0.006	0.01	1					-2.36721	0.001	0.01	1
Abat	0.324175	0.067	0.052	0.129205	-0.244099	0.067	0.061	1	0.0800765	0.061	0.052	1	-0.852206	0.042	0.06	1	0.631559	0.042	0.054	1	-0.220647	0.054	0.06	1													0.128504	0.125	0.109	1	-0.582796	0.125	0.066	1	-0.454292	0.066	0.109	1	0.973118
Abca1	0.379689	0.293	0.246	5.68e-18	-0.40055	0.293	0.263	4.42e-25	-0.0208605	0.263	0.246	1	0.691776	0.401	0.245	6.67e-45	-0.70734	0.401	0.236	7.35e-75	-0.0155647	0.236	0.245	1	1.0768	0.095	0.043	7.39e-15	-0.459782	0.095	0.047	4.24e-35	0.617017	0.047	0.043	1	-0.124449	0.33	0.347	1	0.153542	0.33	0.309	1	0.0290938	0.309	0.347	1	0.57486
Abca12	-0.0564856	0.054	0.054	1	0.358373	0.054	0.068	0.0165505	0.301887	0.068	0.054	0.0334812
Abca13
Abca14
Abca15
Abca16
Abca17																																					-3.7766	0	0.01	1					-4.80844	0	0.01	1
Abca2	0.383665	0.109	0.084	1	-1.30892	0.109	0.046	7.15e-76	-0.925257	0.046	0.084	4.87e-56																									4.70097	0.018	0	1	-3.91128	0.018	0.001	1
Abca3	0.164702	0.146	0.128	1	-0.205245	0.146	0.14	1	-0.0405428	0.14	0.128	1	0.0067341	0.041	0.032	1	-0.347932	0.041	0.029	1	-0.341198	0.029	0.032	1	0.210503	0.152	0.119	1	-0.108502	0.152	0.103	1.49e-11	0.102001	0.103	0.119	1	-0.215857	0.158	0.119	1	0.376557	0.158	0.147	1	0.160699	0.147	0.119	1	-0.290077
Abca4	-0.0698567	0.035	0.033	1	0.714128	0.035	0.055	7.05e-09	0.644271	0.055	0.033	6.82e-08													0.424172	0.012	0.008	1	0.838256	0.012	0.014	1	1.26243	0.014	0.008	1	-0.696876	0.012	0.007	1	-5.19779	0.012	0	1					-0.515157
Abca5	-0.201026	0.074	0.079	1	0.151298	0.074	0.084	1	-0.0497276	0.084	0.079	1	-0.183428	0.068	0.062	1	0.000761274	0.068	0.057	1	-0.182667	0.057	0.062	1	0.557185	0.028	0.017	1	0.303935	0.028	0.024	1	0.86112	0.024	0.017	1	-0.648805	0.021	0.037	1	0.956498	0.021	0.022	1	0.307693	0.022	0.037	1	0.00894128
Abca6													0.338022	0.627	0.498	7.77e-19	-0.140571	0.627	0.536	7.86e-10	0.197451	0.536	0.498	1																									-2.36912
Abca7	-0.0165185	0.041	0.043	1	-1.34644	0.041	0.021	1.05e-17	-1.36295	0.021	0.043	3.63e-31	0.567104	0.035	0.016	0.562234	-0.831119	0.035	0.015	7.74e-09	-0.264015	0.015	0.016	1	0.211558	0.079	0.054	1	-0.468998	0.079	0.041	2.06e-21	-0.25744	0.041	0.054	0.00636338	-0.325059	0.054	0.051	1	-0.687895	0.054	0.022	1	-1.01295	0.022	0.051	1	0.213166
Abca8a	1.12904	0.011	0.004	1.95e-25	-6.47224	0.011	0	4.28e-53					0.112677	0.945	0.902	4.77e-06	0.171569	0.945	0.943	0.0353343	0.284246	0.943	0.902	3.62e-27													-0.133502	0.015	0.014	1	-4.72675	0.015	0.001	1	-4.86025	0.001	0.014	1	3.34618
Abca8b													0.325895	0.712	0.599	2.18e-16	-0.267749	0.712	0.627	1.07e-18	0.0581455	0.627	0.599	1	0.749916	0.014	0.009	1	-0.229617	0.014	0.008	5.6e-21					0.427332	0.021	0.014	1	0.60699	0.021	0.02	1	1.03432	0.02	0.014	1
Abca9													0.278391	0.542	0.415	4.86e-15	-0.157023	0.542	0.45	3.91e-08	0.121368	0.45	0.415	1													0.356496	0.03	0.027	1	-1.52059	0.03	0.016	1	-1.16409	0.016	0.027	1
Abcb10	-0.0654284	0.135	0.13	1	-0.35467	0.135	0.113	0.000664611	-0.420099	0.113	0.13	2.7e-07	0.353722	0.064	0.046	1	-0.274238	0.064	0.046	0.0368639	0.0794843	0.046	0.046	1	0.154793	0.042	0.037	1	-0.162875	0.042	0.028	0.000630821	-0.00808147	0.028	0.037	0.000276353	0.455927	0.092	0.061	1	-1.03211	0.092	0.036	1	-0.576187	0.036	0.061	1	-0.279599
Abcb11
Abcb1a																									0.195182	0.269	0.217	0.00859936	0.258407	0.269	0.221	1	0.453588	0.221	0.217	1	0.432965	0.054	0.031	1	0.581508	0.054	0.055	1	1.01447	0.055	0.031	1	0.219035
Abcb1b	0.799784	0.014	0.01	1	-0.884376	0.014	0.008	0.0891721	-0.0845921	0.008	0.01	1	-0.0761551	0.061	0.049	1	0.0830466	0.061	0.051	1	0.00689147	0.051	0.049	1	-0.0435128	0.121	0.104	1	0.2734	0.121	0.093	0.265855	0.229888	0.093	0.104	1	1.53678	0.024	0.014	1	-0.370699	0.024	0.019	1	1.16608	0.019	0.014	1	0.823483
Abcb4	-0.240257	0.297	0.315	1.11e-10	0.0260191	0.297	0.304	1	-0.214238	0.304	0.315	7.03e-10													0.924266	0.037	0.018	1	0.436738	0.037	0.033	1	1.361	0.033	0.018	1	4.35468	0.024	0	1	-2.368	0.024	0.001	1
Abcb5
Abcb6	0.0548377	0.034	0.026	1	-0.650343	0.034	0.02	5.41e-12	-0.595505	0.02	0.026	5.74e-06																									-0.714805	0.021	0.024	1	-0.731979	0.021	0.004	1	-1.44678	0.004	0.024	1
Abcb7	-0.192596	0.32	0.33	4.98e-05	0.177595	0.32	0.362	2e-05	-0.0150002	0.362	0.33	1	-0.0853239	0.181	0.159	1	0.124003	0.181	0.158	0.19986	0.0386787	0.158	0.159	1	-0.0657874	0.146	0.129	1	0.0515865	0.146	0.095	6.27e-21	-0.0142009	0.095	0.129	6.1e-15	0.0742697	0.229	0.197	1	0.311842	0.229	0.186	1	0.386112	0.186	0.197	1	-0.808113
Abcb8	-0.0330676	0.218	0.206	1	-0.421306	0.218	0.187	4.41e-18	-0.454374	0.187	0.206	5.01e-21																									3.85124	0.036	0.003	1	-4.26506	0.036	0.003	1
Abcb9	-0.160347	0.107	0.106	1	-0.061719	0.107	0.106	1	-0.222066	0.106	0.106	1													0.372289	0.019	0.013	1	-0.273571	0.019	0.013	0.231978	0.098718	0.013	0.013	1					1.84984	0.006	0.012	1	0.736019	0.012	0.003	1	-0.639796
Abcc1	-0.133789	0.439	0.456	0.00213216	-0.225584	0.439	0.434	9.24e-10	-0.359374	0.434	0.456	1.33e-37	0.0599401	0.164	0.124	1	-0.315965	0.164	0.116	5.1e-23	-0.256025	0.116	0.124	5.85e-08	0.0310059	0.035	0.018	1	0.685215	0.035	0.037	1.9e-14	0.71622	0.037	0.018	7.85e-09	-2.18736	0.03	0.044	1	1.86924	0.03	0.045	1	-0.318118	0.045	0.044	1	-0.259426
Abcc10	0.48626	0.065	0.051	1	-0.701315	0.065	0.048	4.24e-19	-0.215054	0.048	0.051	4.32e-10	0.810046	0.017	0.009	1	0.227792	0.017	0.017	1	1.03784	0.017	0.009	1	2.29922	0.012	0.004	1	-0.615197	0.012	0.006	1.21e-09					0.667753	0.018	0.02	1	-0.746258	0.018	0.01	1	-0.0785052	0.01	0.02	1	1.96985
Abcc12
Abcc2
Abcc3
Abcc4	0.209455	0.161	0.137	1	-0.0601159	0.161	0.16	1	0.149339	0.16	0.137	1	-0.129715	0.102	0.092	1	-0.153386	0.102	0.083	0.27693	-0.283101	0.083	0.092	1	-0.0390236	0.317	0.294	1	0.13935	0.317	0.263	1	0.100326	0.263	0.294	1	0.188821	0.235	0.218	1	0.421561	0.235	0.226	1	0.610382	0.226	0.218	1	-0.29368
Abcc5	0.00732768	0.542	0.515	1	-0.178809	0.542	0.547	0.114291	-0.171481	0.547	0.515	0.292385	0.132953	0.347	0.266	0.0279924	-0.210261	0.347	0.268	2.2e-17	-0.0773078	0.268	0.266	0.186878	0.167963	0.213	0.159	1	-0.0187791	0.213	0.143	3.87e-30	0.149184	0.143	0.159	1.15e-14	0.0786732	0.277	0.19	1	0.0734749	0.277	0.204	1	0.152148	0.204	0.19	1	-0.0295344
Abcc6
Abcc8	-0.445563	0.315	0.371	8.67e-25	-0.36121	0.315	0.275	3.69e-26	-0.806773	0.275	0.371	2.91e-117
Abcc9	-0.158527	0.674	0.695	5.28e-14	0.128556	0.674	0.74	7.16e-21	-0.0299717	0.74	0.695	1	3.344	0.013	0.001	0.074332	1.06848	0.013	0.013	9.86e-06	4.41248	0.013	0.001	1													6.92324	0.036	0	1	-3.53025	0.036	0.003	1					6.20338
Abcd1	0.521611	0.089	0.065	1	-0.696066	0.089	0.062	8.97e-12	-0.174455	0.062	0.065	0.00229088	0.451883	0.038	0.021	1	-0.0699978	0.038	0.029	1	0.381885	0.029	0.021	1	1.00892	0.037	0.02	1	-0.143689	0.037	0.024	7.18e-06	0.865234	0.024	0.02	1	0.247854	0.033	0.037	1	0.829774	0.033	0.047	1	1.07763	0.047	0.037	1	0.693967
Abcd2	0.170136	0.031	0.028	1	-0.579137	0.031	0.022	1	-0.409001	0.022	0.028	1	0.0233981	0.041	0.031	1	0.343839	0.041	0.038	1	0.367237	0.038	0.031	1
Abcd3	-0.0111345	0.668	0.658	1	0.309488	0.668	0.786	1.35e-95	0.298353	0.786	0.658	1.11e-86	0.258969	0.139	0.093	0.139274	0.0790068	0.139	0.119	2.3e-12	0.337976	0.119	0.093	1	2.52755	0.049	0.006	1	0.396022	0.049	0.049	3.61e-12	2.92357	0.049	0.006	9.84e-06	0.5248	0.131	0.085	1	0.743564	0.131	0.144	1	1.26836	0.144	0.085	1	2.22582
Abcd4	-0.285686	0.054	0.055	1	-0.399076	0.054	0.044	2.26e-21	-0.684762	0.044	0.055	5.74e-18	0.00349953	0.082	0.067	1	-0.457428	0.082	0.05	2.78e-14	-0.453928	0.05	0.067	0.000506615	0.281527	0.061	0.044	1	-0.290888	0.061	0.034	2.31e-18	-0.00936079	0.034	0.044	0.0224367	-0.123498	0.083	0.061	1	-1.08587	0.083	0.032	1	-1.20937	0.032	0.061	1	-0.108958
Abce1	0.169365	0.159	0.135	1	-0.225733	0.159	0.15	1	-0.056368	0.15	0.135	1	-0.00605474	0.141	0.111	1	-0.107968	0.141	0.11	0.0537483	-0.114022	0.11	0.111	1	-0.410122	0.087	0.095	1	0.290805	0.087	0.07	0.141444	-0.119317	0.07	0.095	2.4e-07	-0.489417	0.116	0.133	1	-0.0789552	0.116	0.083	1	-0.568372	0.083	0.133	1	0.560178
Abcf1	0.488824	0.139	0.1	3.05e-10	-1.1924	0.139	0.072	8.52e-75	-0.703579	0.072	0.1	5.51e-23	0.592935	0.121	0.065	7.85e-08	-0.940382	0.121	0.056	1.55e-35	-0.347448	0.056	0.065	0.00729434	0.149192	0.1	0.083	1	-0.362939	0.1	0.057	3.34e-25	-0.213748	0.057	0.083	4.27e-11	0.454695	0.101	0.085	1	-1.1552	0.101	0.039	0.114047	-0.700505	0.039	0.085	1	-0.277799
Abcf2	0.52731	0.057	0.039	0.676559	-1.52181	0.057	0.02	3.56e-29	-0.9945	0.02	0.039	2.88e-10	-0.101759	0.037	0.031	1	-0.942714	0.037	0.016	5.21e-07	-1.04447	0.016	0.031	6.07e-07	0.260312	0.03	0.022	1	-0.523686	0.03	0.013	6.88e-07	-0.263374	0.013	0.022	0.000252898	-0.419776	0.03	0.037	1	-2.43855	0.03	0.004	1	-2.85833	0.004	0.037	1	-0.646401
Abcf3	0.115357	0.09	0.082	1	-0.639843	0.09	0.066	3.32e-08	-0.524485	0.066	0.082	9.82e-06	-0.0784249	0.037	0.035	1	-0.189719	0.037	0.028	0.0601297	-0.268144	0.028	0.035	1	-0.501653	0.033	0.036	1	0.168122	0.033	0.024	0.0217723	-0.333532	0.024	0.036	0.0148867	0.919235	0.048	0.027	1	-0.355666	0.048	0.033	1	0.563569	0.033	0.027	1	-0.0483386
Abcg1																									0.136533	0.059	0.05	1	-0.640138	0.059	0.029	2.96e-17	-0.503604	0.029	0.05	1.77e-07	0.0240232	0.08	0.068	1	-0.229196	0.08	0.061	1	-0.205172	0.061	0.068	1	3.03537
Abcg2	-0.0920059	0.106	0.111	1	0.350861	0.106	0.133	0.86484	0.258855	0.133	0.111	1	-0.0400725	0.126	0.106	1	0.309361	0.126	0.123	1	0.269289	0.123	0.106	1	0.307946	0.346	0.266	7.77e-09	0.126046	0.346	0.275	0.00339142	0.433992	0.275	0.266	1	1.01266	0.247	0.143	1	0.351736	0.247	0.229	1	1.36439	0.229	0.143	1	-0.0840365
Abcg3																																					-2.99671	0.006	0.034	1					-2.58709	0.003	0.034	1
Abcg4
Abcg5
Abcg8
Abhd10	-0.211242	0.088	0.097	1	-0.240166	0.088	0.084	1	-0.451408	0.084	0.097	0.00439097	-0.030252	0.041	0.033	1	-0.238362	0.041	0.026	0.000651091	-0.268614	0.026	0.033	1	0.340008	0.038	0.03	1	-0.0727737	0.038	0.023	2.25e-05	0.267234	0.023	0.03	1	0.0672524	0.036	0.044	1	0.1683	0.036	0.031	1	0.235553	0.031	0.044	1	0.272137
Abhd11	1.11073	0.055	0.02	4.33e-13	-1.89045	0.055	0.018	3.62e-27	-0.779724	0.018	0.02	1	0.822122	0.028	0.013	1	-0.997336	0.028	0.01	5.52e-05	-0.175215	0.01	0.013	1													0.37119	0.018	0.017	1	-2.18624	0.018	0.003	1	-1.81505	0.003	0.017	1	5.10021
Abhd12	-0.0937517	0.171	0.179	1	0.00256508	0.171	0.185	1	-0.0911866	0.185	0.179	1	0.00998825	0.091	0.07	1	-0.197891	0.091	0.065	1.21e-05	-0.187903	0.065	0.07	1	-0.172395	0.065	0.057	1	-0.0802141	0.065	0.039	7.5e-12	-0.252609	0.039	0.057	2.43e-07	0.201752	0.062	0.058	1	-0.0448013	0.062	0.058	1	0.15695	0.058	0.058	1	-0.0785674
Abhd12b
Abhd13	0.271064	0.071	0.057	0.043005	0.0722587	0.071	0.068	1	0.343322	0.068	0.057	1	-0.0513424	0.012	0.014	1	0.334676	0.012	0.012	1	0.283333	0.012	0.014	1	-0.381111	0.016	0.018	1	0.540649	0.016	0.012	1	0.159539	0.012	0.018	1	-0.0488254	0.015	0.024	1	0.407631	0.015	0.015	1	0.358806	0.015	0.024	1	0.270063
Abhd14a	0.225659	0.032	0.032	1	-1.45767	0.032	0.016	0.000294387	-1.23201	0.016	0.032	8.99e-06	-0.35114	0.029	0.027	1	-0.246796	0.029	0.019	1	-0.597936	0.019	0.027	1													0.674636	0.042	0.024	1	-2.75614	0.042	0.004	1	-2.0815	0.004	0.024	1	1.52048
Abhd14b	0.233947	0.092	0.083	1	0.132238	0.092	0.126	0.044217	0.366185	0.126	0.083	1	-0.4169	0.027	0.025	1	0.992938	0.027	0.046	1	0.576038	0.046	0.025	1													-1.55208	0.036	0.054	1	1.7921	0.036	0.047	1	0.240021	0.047	0.054	1
Abhd15	-0.211586	0.02	0.025	1.97e-05	-0.385775	0.02	0.014	0.30405	-0.597362	0.014	0.025	1.18e-24	-0.0779516	0.024	0.017	1	0.337014	0.024	0.021	1	0.259062	0.021	0.017	1	0.0302916	0.011	0.009	1	-2.25129	0.011	0.001	7.31e-17					3.81617	0.021	0	1	-2.80011	0.021	0.001	1					0.399999
Abhd16a	0.62663	0.098	0.064	0.664039	-1.67318	0.098	0.039	2.1e-68	-1.04655	0.039	0.064	3.62e-40	0.121315	0.115	0.086	1	-0.851966	0.115	0.054	4.65e-27	-0.730651	0.054	0.086	8.63e-14	0.353735	0.089	0.063	1	-0.563734	0.089	0.042	3.02e-28	-0.21	0.042	0.063	1.51e-09	-0.237068	0.137	0.167	1	-0.489268	0.137	0.073	1	-0.726336	0.073	0.167	0.848636	-0.0165776
Abhd16b
Abhd17a	0.363858	0.011	0.014	1	-3.7033	0.011	0.002	5.62e-07	-3.33944	0.002	0.014	4.8e-07	0.385672	0.025	0.017	1	-0.499726	0.025	0.015	1	-0.114054	0.015	0.017	1	0.314899	0.1	0.078	1	-0.762853	0.1	0.039	1.64e-39	-0.447955	0.039	0.078	6.76e-19	-0.310838	0.027	0.031	1	0.0823373	0.027	0.017	1	-0.228501	0.017	0.031	1	0.38094
Abhd17b	-0.0004331	0.154	0.157	1	-0.13144	0.154	0.158	1	-0.131873	0.158	0.157	1	0.199075	0.157	0.126	1	-0.363196	0.157	0.111	2.53e-09	-0.164121	0.111	0.126	0.197927	-0.0533278	0.11	0.096	1	-0.106624	0.11	0.068	5.73e-18	-0.159951	0.068	0.096	2.22e-09	0.0696001	0.188	0.197	1	-0.15829	0.188	0.135	1	-0.0886899	0.135	0.197	1	-0.0820024
Abhd17c	-0.297779	0.145	0.163	5.85e-06	-0.0446149	0.145	0.145	1	-0.342394	0.145	0.163	1.1e-15	0.104742	0.022	0.017	1	0.332012	0.022	0.022	1	0.436754	0.022	0.017	1	0.301996	0.019	0.016	1	0.134929	0.019	0.013	0.00118763	0.436924	0.013	0.016	0.00350624	0.993645	0.051	0.041	1	-1.22722	0.051	0.022	1	-0.233571	0.022	0.041	1	0.131687
Abhd18	-0.124986	0.631	0.637	3.83e-07	-0.0999255	0.631	0.652	1	-0.224912	0.652	0.637	7.34e-14	0.52081	0.084	0.048	1	0.86718	0.084	0.136	1	1.38799	0.136	0.048	1	1.97771	0.07	0.017	6.3e-06	-0.123176	0.07	0.041	2.87e-41	1.85454	0.041	0.017	9.5e-07	0.548593	0.131	0.065	1	-0.289856	0.131	0.086	1	0.258737	0.086	0.065	1	4.30807
Abhd2	-0.584926	0.113	0.157	1.09e-23	-0.688582	0.113	0.079	5.55e-26	-1.27351	0.079	0.157	1.66e-116	0.26764	0.152	0.102	0.0108966	-0.499818	0.152	0.096	4.88e-16	-0.232178	0.096	0.102	1	0.189679	0.124	0.096	1	-0.367454	0.124	0.068	4.02e-27	-0.177775	0.068	0.096	2.24e-15	-0.00798295	0.161	0.167	1	-0.0247076	0.161	0.13	1	-0.0326905	0.13	0.167	1	0.0213457
Abhd3	-0.146415	0.035	0.04	1	0.00947514	0.035	0.039	1	-0.13694	0.039	0.04	1	-0.0895581	0.035	0.025	1	0.521952	0.035	0.035	1	0.432393	0.035	0.025	1													-3.39537	0.003	0.014	1					-2.20439	0.003	0.014	1
Abhd4	0.227373	0.139	0.118	1	-0.220859	0.139	0.131	0.0548871	0.00651366	0.131	0.118	1	-0.273655	0.026	0.026	1	-0.214203	0.026	0.018	2.19e-06	-0.487858	0.018	0.026	6.87e-08	0.444643	0.02	0.013	1	0.00820844	0.02	0.011	2.03e-08	0.452852	0.011	0.013	0.00173959	-1.97194	0.012	0.02	1	1.27562	0.012	0.017	1	-0.696312	0.017	0.02	1	0.0174201
Abhd5	-0.157099	0.123	0.13	1	0.0598967	0.123	0.133	1	-0.0972022	0.133	0.13	1	0.337832	0.063	0.041	1	-0.695581	0.063	0.034	1.33e-08	-0.35775	0.034	0.041	1	-0.0837816	0.043	0.036	1	-0.21644	0.043	0.024	4.96e-10	-0.300222	0.024	0.036	1.18e-05	0.150428	0.062	0.068	1	-0.87561	0.062	0.036	1	-0.725182	0.036	0.068	1	-0.6723
Abhd6	0.0333218	0.133	0.127	1	0.0713963	0.133	0.147	1	0.104718	0.147	0.127	1													0.090439	0.045	0.039	1	-0.181443	0.045	0.027	2.96e-08	-0.0910042	0.027	0.039	0.000553763	1.00893	0.104	0.065	1	-0.998169	0.104	0.052	1	0.0107586	0.052	0.065	1	0.223527
Abhd8													0.366401	0.02	0.013	1	-1.03841	0.02	0.007	0.000258946	-0.67201	0.007	0.013	0.00529137	0.799952	0.014	0.009	1	-0.537109	0.014	0.005	5.68e-05					0.364537	0.042	0.037	1	-1.06137	0.042	0.02	1	-0.69683	0.02	0.037	1	2.54804
Abi1	0.119189	0.292	0.269	1	-0.0403622	0.292	0.307	1	0.0788263	0.307	0.269	1	0.0354959	0.49	0.42	1	0.301384	0.49	0.488	1	0.33688	0.488	0.42	1.04e-06	-0.092274	0.404	0.376	1	0.443234	0.404	0.387	1	0.35096	0.387	0.376	1	0.168387	0.562	0.507	1	-0.0528514	0.562	0.491	1	0.115535	0.491	0.507	1	-0.350742
Abi2	0.439934	0.075	0.059	1	0.366761	0.075	0.103	0.000152444	0.806695	0.103	0.059	2.41e-11	-0.177771	0.222	0.192	1	0.398104	0.222	0.224	1	0.220333	0.224	0.192	1	-0.161058	0.12	0.116	1	0.409483	0.12	0.101	1	0.248425	0.101	0.116	1	-0.209232	0.211	0.235	1	0.492503	0.211	0.213	1	0.283271	0.213	0.235	1	0.417909
Abi3																									-0.180408	0.215	0.204	1	-0.344697	0.215	0.128	8.91e-35	-0.525106	0.128	0.204	2.4e-28	0.106488	0.137	0.119	1	0.20229	0.137	0.103	1	0.308778	0.103	0.119	1	-0.487699
Abi3bp													-0.340657	0.514	0.523	0.0100839	0.718215	0.514	0.584	3.18e-37	0.377558	0.584	0.523	5.34e-10	3.02734	0.013	0.003	1	-0.19617	0.013	0.009	1					2.09768	0.054	0.02	1	0.0489142	0.054	0.047	1	2.14659	0.047	0.02	1	0.117459
Abitram	-0.0628482	0.016	0.013	1	0.278327	0.016	0.023	1	0.215479	0.023	0.013	3.11e-06	-1.03013	0.008	0.012	1					-0.877112	0.008	0.012	1
Abl1	0.137805	0.519	0.471	0.000666099	-0.3865	0.519	0.479	6.05e-41	-0.248695	0.479	0.471	1.31e-12	0.317633	0.298	0.217	3.82e-10	-0.363939	0.298	0.214	9.35e-37	-0.0463058	0.214	0.217	0.0134239	0.305134	0.212	0.161	0.0109514	-0.191024	0.212	0.138	9.55e-44	0.11411	0.138	0.161	1.22e-13	-0.0968871	0.286	0.255	1	-0.0269918	0.286	0.197	1	-0.123879	0.197	0.255	1	0.699477
Abl2	-0.0631518	0.305	0.312	1	0.105346	0.305	0.339	1	0.0421938	0.339	0.312	1	0.0923884	0.264	0.206	0.271401	-0.0557538	0.264	0.211	1.27e-07	0.0366346	0.211	0.206	1	0.192217	0.208	0.166	1	-0.11035	0.208	0.142	9.42e-24	0.0818676	0.142	0.166	1.21e-06	0.141539	0.241	0.224	1	0.347709	0.241	0.25	1	0.489248	0.25	0.224	1	0.190645
Ablim1	-0.407952	0.916	0.949	1.08e-195	0.449479	0.916	0.965	0	0.0415273	0.965	0.949	1.23e-06	2.17551	0.401	0.096	1.51e-132	-0.98848	0.401	0.213	3.04e-147	1.18703	0.213	0.096	1	0.181788	0.912	0.837	2.83e-16	-0.0302769	0.912	0.878	1	0.151512	0.878	0.837	1.84e-09	0.0780046	0.789	0.755	1	0.0911229	0.789	0.777	1	0.169127	0.777	0.755	1	0.181921
Ablim2	0.101702	0.458	0.418	0.0950833	-0.457023	0.458	0.402	4.29e-56	-0.355321	0.402	0.418	7.64e-27													-0.0481948	0.029	0.022	1	0.395638	0.029	0.028	2.18e-13	0.347443	0.028	0.022	0.0593966	-0.862106	0.054	0.068	1	1.3356	0.054	0.079	1	0.473494	0.079	0.068	1
Ablim3													-0.239287	0.061	0.053	1	0.466352	0.061	0.067	1	0.227065	0.067	0.053	1	0.171807	0.692	0.615	7.96e-06	-0.111222	0.692	0.598	1.09e-06	0.0605858	0.598	0.615	1	-0.0720845	0.039	0.027	1	-0.469528	0.039	0.019	1	-0.541612	0.019	0.027	1	0.409155
Abo
Abr	-0.632652	0.044	0.079	3.22e-14	-0.822476	0.044	0.033	6.17e-18	-1.45513	0.033	0.079	7.12e-78	-0.0153463	0.079	0.069	1	-0.0615298	0.079	0.062	0.000221318	-0.076876	0.062	0.069	0.401589	-0.0205127	0.127	0.107	1	-0.315458	0.127	0.07	9.62e-29	-0.335971	0.07	0.107	7.45e-14	-0.557803	0.164	0.17	1	-0.0493636	0.164	0.118	1	-0.607167	0.118	0.17	1	0.165561
Abra	-0.0382162	0.188	0.189	1	0.947743	0.188	0.29	1.62e-106	0.909527	0.29	0.189	3.77e-80
Abracl	-0.916405	0.003	0.013	0.101856	0.267982	0.003	0.011	2.57e-05	-0.648423	0.011	0.013	1	-0.0550916	0.022	0.02	1	0.870767	0.022	0.035	1	0.815676	0.035	0.02	1	-0.353533	0.031	0.034	1	-0.0360034	0.031	0.017	0.00273287	-0.389536	0.017	0.034	0.000350875	-1.5902	0.021	0.041	1	0.828832	0.021	0.013	1	-0.761364	0.013	0.041	1	0.567637
Abraxas1	-0.172771	0.117	0.119	1	-0.0194355	0.117	0.121	1	-0.192206	0.121	0.119	1	0.139356	0.027	0.022	1	-0.00444148	0.027	0.024	1	0.134914	0.024	0.022	1	0.0203846	0.023	0.017	1	-0.233477	0.023	0.012	2.12e-07	-0.213093	0.012	0.017	0.0299188	-1.1833	0.039	0.068	1	0.032076	0.039	0.019	1	-1.15122	0.019	0.068	1	1.22722
Abraxas2	-0.0870043	0.085	0.083	1	-0.253917	0.085	0.078	0.000193657	-0.340922	0.078	0.083	4.28e-12	0.0693948	0.044	0.039	1	-0.360042	0.044	0.033	0.000469529	-0.290647	0.033	0.039	0.242976	-0.00583954	0.039	0.035	1	-0.258201	0.039	0.022	1.52e-09	-0.264041	0.022	0.035	2.28e-10	-1.26438	0.042	0.054	1	0.780981	0.042	0.032	1	-0.483395	0.032	0.054	1	0.00150184
Abt1																																					0.157668	0.012	0.01	1	0.282533	0.012	0.013	1	0.440202	0.013	0.01	1	-3.26045
Abtb1	0.899664	0.056	0.028	1.2e-14	-1.05461	0.056	0.031	1.85e-24	-0.154942	0.031	0.028	1	0.361677	0.038	0.025	1	0.199515	0.038	0.033	1	0.561192	0.033	0.025	1	0.760489	0.032	0.018	1	0.0367892	0.032	0.023	0.0461339	0.797278	0.023	0.018	1	1.06249	0.045	0.034	1	-0.49047	0.045	0.022	1	0.572023	0.022	0.034	1	1.87011
Abtb2	-0.393219	0.596	0.659	7.05e-59	0.204654	0.596	0.666	1.33e-22	-0.188565	0.666	0.659	1.54e-09	-0.0808817	0.045	0.037	1	0.941858	0.045	0.075	1	0.860976	0.075	0.037	1													0.276633	0.208	0.18	1	-1.06996	0.208	0.099	0.00132064	-0.793328	0.099	0.18	0.039856	6.90396
AC087559.2
AC087559.3
AC102264.1
AC123873.1
AC123873.2
AC123873.3
AC124606.1
AC124606.2
AC124742.1
AC124764.1
AC125149.1
AC125149.2
AC125149.3																																					-0.817022	0.006	0.014	1					-5.34044	0	0.014	1
AC125149.4
AC125149.5
AC125178.1
AC125178.2
AC125178.3
AC126035.1
AC132407.1
AC132444.1
AC132444.2
AC132444.3
AC132444.4
AC132444.5
AC132444.6
AC133095.1
AC133095.2
AC133103.1
AC133103.3
AC133103.4
AC133103.5
AC133103.6
AC133103.7
AC140267.1
AC140325.1
AC140325.2
AC140325.3
AC140325.4
AC140365.1
AC141477.1
AC149090.1	1.5989	0.311	0.141	2.47e-208	-0.460996	0.311	0.3	1.23e-06	1.1379	0.3	0.141	1.93e-152	0.653415	0.397	0.254	1.16e-38	-0.309981	0.397	0.298	7.05e-24	0.343434	0.298	0.254	1	0.748548	0.209	0.134	1.71e-20	-0.0323963	0.209	0.168	9.88e-10	0.716152	0.168	0.134	0.354518	0.585788	0.298	0.248	1	-0.515975	0.298	0.204	1	0.0698134	0.204	0.248	1	0.48239
AC149091.1
AC150683.1
AC151602.1
AC163611.1
AC163611.2
AC164084.1
AC164084.2
AC164084.3
AC165294.1
AC165294.2
AC165294.3
AC166256.1
AC168977.1
AC168977.2
AC234645.1
Acaa1a	0.44931	0.08	0.052	0.466741	-1.69601	0.08	0.03	1.62e-45	-1.2467	0.03	0.052	3.25e-21	0.164404	0.047	0.037	1	0.00190209	0.047	0.04	1	0.166306	0.04	0.037	1	0.192107	0.034	0.021	1	0.389442	0.034	0.025	1	0.581549	0.025	0.021	1	-0.982518	0.057	0.054	1	0.435388	0.057	0.032	1	-0.54713	0.032	0.054	1	2.1008
Acaa1b
Acaa2	-0.150963	0.263	0.282	1.22e-18	0.385671	0.263	0.361	8.67e-87	0.234708	0.361	0.282	4.04e-21	0.290621	0.09	0.067	1	-0.972899	0.09	0.035	1.99e-05	-0.682278	0.035	0.067	1.2e-06	-0.745138	0.091	0.113	1.11e-06	0.0502405	0.091	0.056	1	-0.694897	0.056	0.113	4.01e-23	-0.239826	0.089	0.085	1	-1.74604	0.089	0.02	1	-1.98587	0.02	0.085	0.0747381	-0.69403
Acaca	-0.203013	0.191	0.208	1.61e-05	0.187354	0.191	0.223	0.00435459	-0.0156597	0.223	0.208	1	-0.152496	0.28	0.262	1	0.309317	0.28	0.284	1	0.156821	0.284	0.262	1	0.0783325	0.081	0.063	1	0.271308	0.081	0.063	0.0275633	0.34964	0.063	0.063	1	0.0281246	0.205	0.197	1	0.566274	0.205	0.182	1	0.594398	0.182	0.197	1	0.466285
Acacb	0.241588	0.872	0.841	9.42e-66	-0.414197	0.872	0.881	2.28e-157	-0.172609	0.881	0.841	1.69e-08													1.38973	0.021	0.003	0.0637097	1.56647	0.021	0.028	1.13e-75	2.9562	0.028	0.003	2.4e-35					2.44349	0.003	0.023	1	5.63376	0.023	0	1	-0.518404
Acad10	-0.0352939	0.35	0.34	1	-0.340314	0.35	0.316	1.33e-22	-0.375608	0.316	0.34	1.28e-22					1.929	0.006	0.014	7.6e-05	1.86581	0.014	0.002	1	2.34346	0.013	0.002	1	0.353657	0.013	0.012	1.85e-11	2.69712	0.012	0.002	0.761438	1.77314	0.089	0.031	1	-0.454209	0.089	0.042	1	1.31893	0.042	0.031	1	4.73836
Acad11	-0.0153418	0.326	0.314	1	0.188239	0.326	0.373	2.17e-08	0.172897	0.373	0.314	6.93e-09	1.17256	0.046	0.016	0.00149235	-0.56067	0.046	0.026	6.6e-10	0.611892	0.026	0.016	1	0.417364	0.017	0.009	1	-0.497558	0.017	0.01	4.18e-05	-0.0801933	0.01	0.009	2.17e-08	-0.772233	0.036	0.044	1	0.392808	0.036	0.032	1	-0.379424	0.032	0.044	1	1.68325
Acad12	0.301662	0.191	0.152	0.527785	-0.607502	0.191	0.145	4.01e-24	-0.30584	0.145	0.152	5.58e-07	-0.349807	0.011	0.01	1	0.805565	0.011	0.015	0.969191	0.455757	0.015	0.01	1	0.566978	0.023	0.012	1	-0.589136	0.023	0.01	1.42e-11	-0.0221582	0.01	0.012	1.2e-08	1.27557	0.054	0.037	1	-0.337716	0.054	0.042	1	0.937852	0.042	0.037	1	-0.655844
Acad8	0.0559202	0.091	0.093	1	-0.178726	0.091	0.092	1	-0.122806	0.092	0.093	1	0.0944417	0.073	0.056	1	5.49e-05	0.073	0.056	1	0.0944966	0.056	0.056	1	0.151389	0.055	0.04	1	-0.137231	0.055	0.032	1.65e-09	0.0141587	0.032	0.04	1	-0.878095	0.027	0.048	1	1.83899	0.027	0.06	1	0.960898	0.06	0.048	1	0.077801
Acad9	0.013841	0.054	0.048	1	-0.978774	0.054	0.026	5.11e-20	-0.964933	0.026	0.048	2.16e-17	-0.211544	0.035	0.032	1	-0.569915	0.035	0.018	0.000260962	-0.781459	0.018	0.032	0.00465392	0.160835	0.03	0.022	1	-0.713842	0.03	0.011	4.09e-12	-0.553007	0.011	0.022	4.76e-06	-0.112975	0.036	0.034	1	-0.350632	0.036	0.02	1	-0.463607	0.02	0.034	1	3.29217
Acadl	0.0117347	0.46	0.449	1	0.368916	0.46	0.546	4.95e-72	0.38065	0.546	0.449	1.53e-63	-0.193807	0.114	0.11	1	-1.38134	0.114	0.036	2.11e-24	-1.57515	0.036	0.11	6.03e-21	-0.262959	0.173	0.181	1	-1.05881	0.173	0.053	1.89e-56	-1.32177	0.053	0.181	2.86e-81	-0.0173047	0.167	0.173	1	-0.798557	0.167	0.067	1	-0.815862	0.067	0.173	0.522683	-0.194821
Acadm	0.0412637	0.58	0.567	1	-0.120501	0.58	0.593	1	-0.0792378	0.593	0.567	1	0.66559	0.036	0.026	1	-1.04127	0.036	0.016	8.71e-12	-0.375675	0.016	0.026	3.1e-13	-0.138415	0.064	0.06	1	-0.99096	0.064	0.024	1.66e-21	-1.12938	0.024	0.06	1.16e-35	-0.539224	0.071	0.082	1	-0.0530367	0.071	0.039	1	-0.59226	0.039	0.082	1	0.4709
Acads	0.714146	0.035	0.019	1	-2.26434	0.035	0.008	1	-1.55019	0.008	0.019	1	-0.0744556	0.018	0.015	1	-0.775632	0.018	0.007	1	-0.850088	0.007	0.015	1	0.0355747	0.021	0.02	1	-0.343753	0.021	0.011	1	-0.308178	0.011	0.02	1	0.854574	0.021	0.007	1	-0.98406	0.021	0.006	1					-0.118862
Acadsb	-0.0424256	0.209	0.213	1	0.0405956	0.209	0.228	0.1311	-0.00183004	0.228	0.213	1	-0.238945	0.244	0.235	1	0.319275	0.244	0.254	1	0.0803298	0.254	0.235	1	0.123945	0.096	0.076	1	0.336893	0.096	0.08	1	0.460838	0.08	0.076	1	0.411515	0.158	0.122	1	0.433023	0.158	0.157	1	0.844538	0.157	0.122	1	-0.992086
Acadvl	1.20567	0.067	0.032	1	-2.59717	0.067	0.015	1	-1.3915	0.015	0.032	1	-1.02987	0.012	0.026	1	-2.76634	0.012	0.001	1	-3.79621	0.001	0.026	1	-0.573776	0.041	0.061	8.19e-10	-0.0108894	0.041	0.026	1	-0.584666	0.026	0.061	3.35e-07	-0.86794	0.033	0.037	1	-6.50609	0.033	0	1	-7.37403	0	0.037	1	0.000540764
Acan
Acap1																									0.245704	0.016	0.01	1	-0.519246	0.016	0.007	0.106249	-0.273543	0.007	0.01	1	3.76318	0.027	0.003	1	-1.20252	0.027	0.009	1					0.711495
Acap2	0.146452	0.205	0.187	1	-0.228728	0.205	0.2	2.13e-06	-0.0822768	0.2	0.187	1	0.0253465	0.534	0.456	1	-0.0407516	0.534	0.47	0.0793216	-0.0154052	0.47	0.456	1	0.0861236	0.347	0.295	0.306281	0.0958868	0.347	0.28	0.0001227	0.18201	0.28	0.295	1	0.114581	0.408	0.357	1	0.132313	0.408	0.346	1	0.246894	0.346	0.357	1	-0.101945
Acap3	0.0929937	0.019	0.016	1	-1.23408	0.019	0.009	7.58e-23	-1.14109	0.009	0.016	1.59e-10	0.286596	0.107	0.071	8.07e-06	-0.646653	0.107	0.061	7.28e-23	-0.360056	0.061	0.071	1	0.277407	0.063	0.041	0.00512184	-0.373923	0.063	0.03	7.29e-26	-0.096516	0.03	0.041	0.113978	-0.497877	0.068	0.065	1	0.113549	0.068	0.033	1	-0.384328	0.033	0.065	1	-0.399803
Acat1	-0.064891	0.584	0.582	1	0.0351778	0.584	0.63	2.01e-07	-0.0297133	0.63	0.582	1	0.301435	0.124	0.089	1	-0.669589	0.124	0.07	4.55e-21	-0.368154	0.07	0.089	5.96e-11	0.147901	0.077	0.06	1	-0.863467	0.077	0.031	3.66e-27	-0.715566	0.031	0.06	8.94e-37	0.381662	0.155	0.126	1	-0.430914	0.155	0.084	1	-0.0492528	0.084	0.126	1	0.369914
Acat2	0.641233	0.019	0.013	1	-0.152992	0.019	0.017	1	0.488241	0.017	0.013	1																									0.996536	0.015	0.01	1	0.201808	0.015	0.012	1	1.19834	0.012	0.01	1
Acat3
Acbd3	-0.0248996	0.158	0.154	1	-0.370311	0.158	0.132	3.31e-13	-0.39521	0.132	0.154	1.1e-21	-0.0731992	0.255	0.223	1	-0.298847	0.255	0.178	7.4e-17	-0.372046	0.178	0.223	7.57e-10	0.174133	0.116	0.098	1	-0.259434	0.116	0.069	3.83e-24	-0.0853009	0.069	0.098	2.87e-16	0.0396737	0.199	0.163	1	-0.841501	0.199	0.086	0.0080517	-0.801828	0.086	0.163	0.71391	-0.145015
Acbd4	0.0861859	0.102	0.091	1	-0.567318	0.102	0.081	2.24e-13	-0.481132	0.081	0.091	1.1e-32	-0.0658018	0.108	0.089	1	0.0997256	0.108	0.097	1	0.0339239	0.097	0.089	1	0.851032	0.043	0.022	1	0.0155308	0.043	0.027	5.2e-10	0.866562	0.027	0.022	1	-0.664218	0.057	0.082	1	0.840031	0.057	0.077	1	0.175813	0.077	0.082	1	-0.354672
Acbd5	-0.103997	0.198	0.212	1	0.101682	0.198	0.219	1	-0.00231474	0.219	0.212	1	0.185641	0.164	0.129	0.786792	-0.159146	0.164	0.124	3.84e-07	0.0264947	0.124	0.129	1	-0.0182972	0.108	0.098	1	0.192184	0.108	0.083	9.32e-06	0.173887	0.083	0.098	0.138713	-0.0916442	0.188	0.201	1	-0.335951	0.188	0.119	1	-0.427595	0.119	0.201	1	0.419837
Acbd6	-0.243444	0.173	0.194	8.8e-06	0.147582	0.173	0.19	1	-0.0958616	0.19	0.194	1	0.199123	0.152	0.111	1	0.0410987	0.152	0.129	1	0.240222	0.129	0.111	1	-0.0967984	0.138	0.121	1	0.240705	0.138	0.11	0.23541	0.143907	0.11	0.121	1	-0.139588	0.214	0.194	1	0.101243	0.214	0.153	1	-0.0383451	0.153	0.194	1	-0.265423
Acbd7
Accs	0.0854346	0.072	0.064	1	-0.289997	0.072	0.064	0.172579	-0.204562	0.064	0.064	1	-0.030321	0.027	0.019	1	0.206687	0.027	0.025	1	0.176366	0.025	0.019	1	0.155652	0.028	0.021	1	-0.15252	0.028	0.017	0.012764	0.00313212	0.017	0.021	0.74141	0.455249	0.039	0.037	1	-0.598595	0.039	0.025	1	-0.143346	0.025	0.037	1	-2.21574
Accsl
Acd	0.424111	0.029	0.016	1	-2.53692	0.029	0.006	1.44e-25	-2.11281	0.006	0.016	8.92e-13	0.229431	0.014	0.01	1	-0.813411	0.014	0.005	0.0141136	-0.583979	0.005	0.01	1	-0.30536	0.017	0.019	1	-0.653035	0.017	0.007	0.277143	-0.958396	0.007	0.019	0.00104347	3.11987	0.018	0.003	1	-5.92933	0.018	0	1					0.32297
Ace													0.76131	0.212	0.111	1.51e-27	-0.672381	0.212	0.126	2.4e-27	0.0889286	0.126	0.111	1	0.98836	0.033	0.013	1.34e-07	-1.53251	0.033	0.008	4.38e-28	-0.544154	0.008	0.013	1	-0.969435	0.009	0.014	1					-0.684622	0.004	0.014	1	0.149309
Ace2
Acer1
Acer2													0.920543	0.022	0.009	1	1.10649	0.022	0.037	1	2.02703	0.037	0.009	0.0520058	0.420512	0.214	0.145	7.53e-12	0.0181811	0.214	0.16	7.34e-07	0.438693	0.16	0.145	1	0.177091	0.729	0.639	1	0.234495	0.729	0.712	1	0.411586	0.712	0.639	1	0.628455
Acer3	-0.415393	0.153	0.19	4.18e-12	0.538061	0.153	0.212	7.01e-21	0.122668	0.212	0.19	1	-0.0820606	0.101	0.091	1	0.263379	0.101	0.104	1	0.181318	0.104	0.091	1	-0.147752	0.111	0.107	1	0.513686	0.111	0.104	1	0.365934	0.104	0.107	1	-0.0909669	0.208	0.214	1	0.878994	0.208	0.293	1	0.788027	0.293	0.214	1	-0.629939
Ache
Acin1	0.102455	0.482	0.45	1	-0.399638	0.482	0.443	8.03e-31	-0.297183	0.443	0.45	1.22e-16	-0.017736	0.313	0.259	1	-0.222513	0.313	0.239	3.69e-23	-0.240249	0.239	0.259	4.34e-07	0.0668926	0.273	0.225	0.577751	0.0322679	0.273	0.21	2.12e-18	0.0991605	0.21	0.225	0.0176617	-0.00971485	0.402	0.391	1	-0.300936	0.402	0.279	1	-0.310651	0.279	0.391	1	0.0319985
Ackr1
Ackr2													1.2976	0.014	0.007	1	-1.50829	0.014	0.005	0.00128037					1.14148	0.01	0.003	1	-1.98686	0.01	0.002	1.21e-08					-0.0203494	0.012	0.007	1	-1.38096	0.012	0.004	1
Ackr3	-0.577559	0.131	0.171	8.84e-15	0.333411	0.131	0.161	5.45e-15	-0.244149	0.161	0.171	1	0.144306	0.167	0.124	1	-0.682045	0.167	0.086	6.49e-27	-0.537739	0.086	0.124	4.44e-08	0.22261	0.099	0.077	1	2.14308	0.099	0.221	1.11e-74	2.36569	0.221	0.077	5.11e-98	-0.892286	0.179	0.276	1	-0.552105	0.179	0.127	1	-1.44439	0.127	0.276	0.00136702	0.479716
Ackr4	0.158276	0.114	0.1	1	1.2814	0.114	0.258	2.87e-180	1.43967	0.258	0.1	1.89e-198	1.1278	0.111	0.043	5.79e-20	-1.03648	0.111	0.043	1.13e-31	0.0913175	0.043	0.043	1													0.54596	0.068	0.037	1	-0.0891295	0.068	0.039	1	0.456831	0.039	0.037	1
Acly	0.305179	0.113	0.09	1	-0.753402	0.113	0.076	2.72e-26	-0.448223	0.076	0.09	3.08e-11	-0.200705	0.066	0.06	1	-0.0653521	0.066	0.053	0.600922	-0.266057	0.053	0.06	1	0.118202	0.081	0.067	1	0.259961	0.081	0.062	0.0155784	0.378163	0.062	0.067	1	-0.504675	0.048	0.068	1	0.845757	0.048	0.067	1	0.341082	0.067	0.068	1	0.0061509
Acmsd					0.707381	0.008	0.012	1	0.853079	0.012	0.007	1
Acnat1
Acnat2
Aco1	-0.159263	0.143	0.147	1	-0.0112417	0.143	0.149	1	-0.170505	0.149	0.147	1	0.420732	0.121	0.076	0.000459577	-0.499255	0.121	0.074	2.57e-13	-0.078523	0.074	0.076	1	0.149843	0.039	0.029	1	-0.175372	0.039	0.022	1.98e-09	-0.0255286	0.022	0.029	0.00125566	-0.0893763	0.077	0.051	1	-1.17371	0.077	0.02	0.0442048	-1.26308	0.02	0.051	1	0.0610417
Aco2	0.328209	0.787	0.714	4.1e-63	-0.328211	0.787	0.773	2.1e-40	-1.56e-06	0.773	0.714	0.000634131	-0.214761	0.056	0.057	1	0.0796401	0.056	0.049	4.7e-35	-0.135121	0.049	0.057	8.57e-25	-0.205285	0.098	0.103	1	-0.0761053	0.098	0.066	9.76e-39	-0.28139	0.066	0.103	2.06e-54	-0.651825	0.092	0.109	1	-0.078212	0.092	0.052	0.11366	-0.730037	0.052	0.109	0.029834	-0.547933
Acod1
Acot1
Acot10
Acot11	-0.149653	0.299	0.306	1	-0.54459	0.299	0.239	8e-47	-0.694243	0.239	0.306	4.58e-80	0.352305	0.036	0.02	1	0.0951704	0.036	0.031	2.12e-10	0.447475	0.031	0.02	0.0907801													-0.0982417	0.149	0.146	1	-0.833825	0.149	0.074	0.996066	-0.932067	0.074	0.146	0.213637	1.97058
Acot12
Acot13	-0.262157	0.265	0.296	1.72e-15	-0.00762967	0.265	0.28	1	-0.269787	0.28	0.296	0.000226792	-0.418756	0.019	0.021	1	-1.15752	0.019	0.007	1.09e-06	-1.57628	0.007	0.021	1.29e-11	-0.993722	0.019	0.023	1	-0.898862	0.019	0.005	0.00395107	-1.89258	0.005	0.023	2.89e-18	0.718867	0.027	0.014	1	-1.00952	0.027	0.007	1	-0.290657	0.007	0.014	1	1.45572
Acot2					1.78036	0.006	0.025	1.25e-46	1.12743	0.025	0.007	1.26e-20																																					-3.94096
Acot3
Acot4					1.02349	0.007	0.017	3.39e-07	1.15936	0.017	0.005	4.28e-09
Acot5
Acot6	-0.45835	0.013	0.019	0.504259	-0.291794	0.013	0.01	1	-0.750144	0.01	0.019	0.00845658	-0.11113	0.014	0.014	1	0.579868	0.014	0.018	1	0.468738	0.018	0.014	1																	0.51816	0.009	0.013	1	0.741885	0.013	0.007	1
Acot7	0.170243	0.405	0.353	0.0095183	-0.595796	0.405	0.318	7.46e-74	-0.425554	0.318	0.353	1.2e-37	0.922822	0.058	0.024	0.0736569	-0.307305	0.058	0.036	5.66e-16	0.615517	0.036	0.024	1	1.08608	0.034	0.011	1	-0.181008	0.034	0.02	1.22e-22	0.90507	0.02	0.011	1.71e-05	-0.223198	0.062	0.037	1	-0.149882	0.062	0.038	1	-0.373079	0.038	0.037	1	4.85839
Acot8	0.0498465	0.043	0.04	1	0.346892	0.043	0.06	1	0.396739	0.06	0.04	1	0.0858499	0.041	0.031	1	-0.15718	0.041	0.029	0.446397	-0.0713302	0.029	0.031	1	-0.0212319	0.031	0.022	1	-0.0667567	0.031	0.02	0.00399387	-0.0879886	0.02	0.022	1	1.37794	0.048	0.017	1	0.118039	0.048	0.036	1	1.49598	0.036	0.017	1	0.14993
Acot9	0.930666	0.023	0.014	1	-0.519541	0.023	0.018	1	0.411125	0.018	0.014	1	-0.00357649	0.111	0.096	1	0.328163	0.111	0.116	1	0.324587	0.116	0.096	1	-0.127982	0.113	0.109	1	0.625969	0.113	0.12	1	0.497987	0.12	0.109	1	0.0624624	0.125	0.136	1	0.00891501	0.125	0.106	1	0.0713775	0.106	0.136	1	-0.476403
Acox1	0.370955	0.615	0.533	1.44e-48	0.265215	0.615	0.719	3.14e-60	0.636169	0.719	0.533	1.68e-246	0.102684	0.08	0.066	0.0966772	-0.00497958	0.08	0.065	2.4e-16	0.0977043	0.065	0.066	1	0.316081	0.124	0.087	0.262171	0.0054041	0.124	0.086	3.07e-20	0.321485	0.086	0.087	0.0218692	0.109124	0.137	0.136	1	-0.0786168	0.137	0.1	1	0.0305077	0.1	0.136	1	0.790121
Acox2	0.43729	0.01	0.006	1	-0.550421	0.01	0.007	1
Acox3	-0.0198177	0.073	0.072	1	-0.592444	0.073	0.053	6.07e-16	-0.612261	0.053	0.072	3.68e-12	0.0844692	0.058	0.041	1	-0.726233	0.058	0.029	8.95e-16	-0.641764	0.029	0.041	0.000817167	0.188392	0.047	0.037	1	-0.317116	0.047	0.024	2.36e-15	-0.128724	0.024	0.037	0.000187608	0.266479	0.06	0.048	1	-0.305712	0.06	0.041	1	-0.0392331	0.041	0.048	1	-0.292877
Acoxl
Acp1	-0.26763	0.049	0.053	1	-0.273687	0.049	0.044	1	-0.541317	0.044	0.053	1	-0.0127178	0.041	0.035	1	0.124145	0.041	0.035	1	0.111427	0.035	0.035	1	0.302941	0.031	0.022	1	-0.0571159	0.031	0.017	0.140457	0.245825	0.017	0.022	1	-0.695039	0.039	0.054	1	-0.249656	0.039	0.019	1	-0.944695	0.019	0.054	1	-0.762444
Acp2	0.376468	0.038	0.034	1	-0.353973	0.038	0.038	1	0.0224945	0.038	0.034	1	0.224124	0.042	0.024	1	0.13552	0.042	0.034	1	0.359644	0.034	0.024	1	0.501691	0.028	0.018	1	-0.210369	0.028	0.014	0.000113353	0.291322	0.014	0.018	1	0.0794677	0.039	0.031	1	0.133678	0.039	0.029	1	0.213145	0.029	0.031	1	-0.384115
Acp4
Acp5
Acp6	-0.148228	0.131	0.136	1	-0.174842	0.131	0.123	1	-0.32307	0.123	0.136	1.78e-10													0.794314	0.012	0.007	1	-0.337118	0.012	0.008	0.0667249					-0.410267	0.015	0.01	1	0.464425	0.015	0.012	1	0.0541574	0.012	0.01	1	2.53663
Acp7
Acpp
Acr																									0.523586	0.056	0.033	0.0144989	0.725974	0.056	0.059	1	1.24956	0.059	0.033	1.01e-06	3.23724	0.054	0.007	1	0.132402	0.054	0.045	1	3.36964	0.045	0.007	1	-0.258029
Acrbp	0.359682	0.098	0.073	1	-1.0802	0.098	0.055	6.73e-47	-0.720515	0.055	0.073	1.82e-26	0.589905	0.034	0.017	1	-0.650258	0.034	0.018	1.03e-06	-0.0603534	0.018	0.017	1	0.718407	0.037	0.021	1	-0.694589	0.037	0.019	1.97e-12	0.0238182	0.019	0.021	0.251439	0.821699	0.054	0.027	1	-0.600528	0.054	0.02	1	0.221171	0.02	0.027	1	-0.953466
Acrv1
Acsbg1
Acsbg2
Acsf2	-0.0309399	0.078	0.077	1	0.504061	0.078	0.111	0.1224	0.473121	0.111	0.077	8.03e-06	-0.0904781	0.045	0.043	1	0.0708538	0.045	0.041	1	-0.0196243	0.041	0.043	1	0.154974	0.076	0.061	1	-0.154561	0.076	0.046	6.37e-13	0.000413883	0.046	0.061	9.75e-05	-0.193935	0.027	0.034	1	0.376646	0.027	0.028	1	0.182711	0.028	0.034	1	0.317581
Acsf3	-0.0140655	0.024	0.018	1	-0.165251	0.024	0.025	1	-0.179317	0.025	0.018	2.05e-05																	1.13899	0.006	0.011	1	1.34166	0.011	0.003	0.0257185	0.942432	0.012	0.007	1	0.239411	0.012	0.022	1	1.18184	0.022	0.007	1	-1.78336
Acsl1	-0.310379	0.738	0.784	1.82e-63	0.24691	0.738	0.816	5.19e-54	-0.0634693	0.816	0.784	1													1.06933	0.059	0.03	1	-0.450217	0.059	0.035	3.11e-36	0.619115	0.035	0.03	1.96e-38	4.83783	0.03	0	1	0.164848	0.03	0.012	0.0494397	5.00267	0.012	0	1	0.0711951
Acsl3	-0.652312	0.021	0.038	3.88e-06	0.210291	0.021	0.024	1	-0.442021	0.024	0.038	2.03e-07	-0.255169	0.044	0.039	1	0.145176	0.044	0.035	1	-0.109992	0.035	0.039	1	-0.203951	0.021	0.02	1	0.351908	0.021	0.016	1	0.147957	0.016	0.02	1	-1.55175	0.015	0.031	1	1.1626	0.015	0.019	1	-0.389151	0.019	0.031	1	0.30503
Acsl4	-0.242072	0.064	0.079	0.78863	0.322772	0.064	0.082	1	0.0806997	0.082	0.079	1	-0.297474	0.139	0.134	1	0.642335	0.139	0.168	1	0.34486	0.168	0.134	0.70701	-0.18023	0.093	0.09	1	0.231654	0.093	0.071	1	0.0514235	0.071	0.09	0.677649	-0.413468	0.101	0.143	1	0.123696	0.101	0.09	1	-0.289772	0.09	0.143	1	-0.371908
Acsl5													-0.243001	0.068	0.065	1	0.160512	0.068	0.057	1	-0.0824895	0.057	0.065	1	-0.124119	0.097	0.091	1	0.0965212	0.097	0.068	0.000191782	-0.0275979	0.068	0.091	0.046803	-0.144767	0.116	0.105	1	0.315166	0.116	0.103	1	0.170399	0.103	0.105	1	-0.370432
Acsl6	-0.0986936	0.089	0.093	1	-0.589435	0.089	0.065	3.01e-13	-0.688128	0.065	0.093	8.36e-22
Acsm1
Acsm2
Acsm3
Acsm4
Acsm5	0.946129	0.039	0.02	5.24e-13	-0.594765	0.039	0.027	1.32e-05	0.351364	0.027	0.02	1
Acss1	-0.0183911	0.685	0.68	1	-0.0892594	0.685	0.718	1	-0.107651	0.718	0.68	1													0.323259	0.013	0.003	1	2.87324	0.013	0.047	1	3.1965	0.047	0.003	1													5.41016
Acss2	-0.128647	0.293	0.295	1	0.0985498	0.293	0.321	1	-0.0300976	0.321	0.295	1	0.0145926	0.075	0.058	1	0.219387	0.075	0.073	1	0.233979	0.073	0.058	1	1.34928	0.031	0.009	1	0.255662	0.031	0.022	1.19e-06	1.60495	0.022	0.009	1	-1.04968	0.03	0.024	1	1.61736	0.03	0.036	1	0.567673	0.036	0.024	1	2.33437
Acss3	0.588772	0.07	0.049	0.0122671	-0.0285048	0.07	0.064	1	0.560267	0.064	0.049	0.317782	-0.526918	0.119	0.133	1	1.17268	0.119	0.199	9.16e-25	0.645763	0.199	0.133	8.11e-14
Acta1					-1.11322	0.007	0.016	1.56e-68	0.957994	0.016	0.003	2.78e-13	1.02373	0.084	0.038	1.48e-50	-3.19064	0.084	0.005	1.74e-135	-2.16691	0.005	0.038	1.51e-05	1.02685	0.106	0.054	3.55e-31	-1.9741	0.106	0.019	4.62e-138	-0.947249	0.019	0.054	1.43e-13	2.70775	0.095	0.017	0.109005	-2.72479	0.095	0.009	6.59e-06	-0.0170414	0.009	0.017	1	0.0757515
Acta2					0.831582	0.008	0.018	1	2.16997	0.018	0.004	0.000542996	0.175025	0.012	0.011	1	1.12484	0.012	0.014	1	1.29987	0.014	0.011	1	-0.797324	0.008	0.016	1					-2.21448	0.002	0.016	0.00120767													-1.64585
Actb	1.79051	0.068	0.011	6.9e-36	-1.75552	0.068	0.038	0.00163521	0.0349898	0.038	0.011	2.88e-90	-0.380202	0.096	0.093	1	2.51125	0.096	0.332	1.79e-148	2.13105	0.332	0.093	6.18e-171	-0.291811	0.316	0.324	1	0.723683	0.316	0.407	3.59e-47	0.431872	0.407	0.324	2.72e-28	-0.602081	0.134	0.18	1	0.317886	0.134	0.132	1	-0.284195	0.132	0.18	1	-0.320772
Actbl2
Actc1	1.23657	0.458	0.197	8.21e-212	0.248166	0.458	0.507	8.07e-90	1.48473	0.507	0.197	0	-0.344937	0.221	0.233	1	-10.9443	0.221	0	2.19e-142	-11.2893	0	0.233	6.67e-185	-0.694712	0.365	0.457	5.56e-40	-1.42831	0.365	0.089	4.55e-105	-2.12302	0.089	0.457	0	-0.220356	0.324	0.374	1	-10.6412	0.324	0	1.59e-10	-10.8616	0	0.374	3.85e-27	-0.19119
Acte1
Actg1	0.696266	0.433	0.285	8.15e-58	0.982764	0.433	0.673	0	1.67903	0.673	0.285	0					5.55399	0.005	0.139	8.21e-135	6.77593	0.139	0.002	1.18e-147	0.173025	0.107	0.088	1	1.74164	0.107	0.182	9.02e-49	1.91466	0.182	0.088	2.19e-60	0.248856	0.021	0.01	1	0.944562	0.021	0.025	1	1.19342	0.025	0.01	1	0.0618486
Actg2					1.18633	0.004	0.01	0.000142732	1.15584	0.01	0.003	0.00680781
Actl10
Actl11
Actl6a	0.160219	0.078	0.072	1	-0.716717	0.078	0.055	1.15e-12	-0.556498	0.055	0.072	9.15e-09	-0.178752	0.064	0.056	1	-0.346596	0.064	0.044	6.49e-05	-0.525349	0.044	0.056	0.178833	0.0147235	0.062	0.054	1	-0.224179	0.062	0.038	6.01e-09	-0.209456	0.038	0.054	0.000137767	-0.604178	0.06	0.082	1	-0.28302	0.06	0.039	1	-0.887198	0.039	0.082	1	-0.279381
Actl6b
Actl7a
Actl7b
Actl9
Actn1	0.228204	0.155	0.126	0.0122521	-0.74779	0.155	0.098	1.36e-51	-0.519586	0.098	0.126	6.34e-22	0.256882	0.083	0.053	0.0565447	-0.432269	0.083	0.052	8.72e-12	-0.175387	0.052	0.053	1	0.192531	0.159	0.12	1	-0.527094	0.159	0.083	2.44e-40	-0.334563	0.083	0.12	3.58e-15	0.411117	0.295	0.214	1	-0.30525	0.295	0.201	1	0.105867	0.201	0.214	1	-0.0299356
Actn2	0.186025	0.914	0.924	2.06e-20	0.473992	0.914	0.968	0	0.660017	0.968	0.924	0
Actn3
Actn4	0.0664453	0.269	0.26	1	-0.388335	0.269	0.24	5.22e-08	-0.32189	0.24	0.26	1.62e-10	0.50381	0.227	0.154	4.19e-07	-0.00679246	0.227	0.198	1	0.497018	0.198	0.154	1	0.0140478	0.416	0.366	1	0.259765	0.416	0.35	1	0.273813	0.35	0.366	1	0.0634559	0.476	0.435	1	0.00535178	0.476	0.376	1	0.0688077	0.376	0.435	1	-0.0314362
Actr10	0.00789074	0.135	0.124	1	-0.223737	0.135	0.123	1	-0.215846	0.123	0.124	1	-0.130355	0.096	0.091	1	-0.0289055	0.096	0.083	1	-0.159261	0.083	0.091	1	0.204865	0.095	0.07	1	-0.00975407	0.095	0.066	1.65e-05	0.195111	0.066	0.07	1	-0.0920328	0.113	0.139	1	-0.455676	0.113	0.077	1	-0.547709	0.077	0.139	1	0.545907
Actr1a	0.107684	0.141	0.118	1	-0.555967	0.141	0.107	3.07e-15	-0.448283	0.107	0.118	1.36e-08	0.0782151	0.112	0.088	1	-0.42377	0.112	0.072	3.03e-15	-0.345554	0.072	0.088	0.00333255	0.0893711	0.119	0.098	1	-0.162251	0.119	0.079	9.57e-12	-0.0728797	0.079	0.098	4.39e-05	0.00960983	0.098	0.085	1	-0.17892	0.098	0.068	1	-0.16931	0.068	0.085	1	0.190821
Actr1b	-0.116451	0.109	0.106	1	-0.462717	0.109	0.086	2.05e-12	-0.579168	0.086	0.106	6.94e-23	0.00575085	0.048	0.037	1	0.466674	0.048	0.051	1	0.472425	0.051	0.037	1	0.24271	0.047	0.034	1	0.0832909	0.047	0.033	0.000645292	0.326001	0.033	0.034	1	-0.65261	0.048	0.051	1	-0.0887439	0.048	0.028	1	-0.741354	0.028	0.051	1	-0.367824
Actr2	0.201993	0.182	0.166	1	-0.239561	0.182	0.174	1	-0.0375681	0.174	0.166	1	0.00874394	0.227	0.19	1	-0.0881829	0.227	0.19	0.000103056	-0.079439	0.19	0.19	1	-0.0557426	0.242	0.225	1	0.0261835	0.242	0.175	2.51e-11	-0.0295592	0.175	0.225	2.52e-07	0.14053	0.226	0.201	1	-0.0900463	0.226	0.178	1	0.0504837	0.178	0.201	1	-0.374887
Actr3	-0.0849891	0.306	0.312	0.000585662	0.380646	0.306	0.395	1.78e-57	0.295657	0.395	0.312	7.57e-24	0.342098	0.186	0.125	0.000102267	1.25846	0.186	0.313	2.39e-40	1.60055	0.313	0.125	1.32e-80	-0.0608684	0.23	0.205	1	1.03743	0.23	0.286	1.11e-19	0.976565	0.286	0.205	3.67e-22	-0.135967	0.179	0.207	1	-0.312981	0.179	0.124	1	-0.448948	0.124	0.207	1	0.762705
Actr3b	0.12949	0.459	0.426	0.0232751	-0.529566	0.459	0.38	1.8e-78	-0.400076	0.38	0.426	1.16e-40
Actr5	-0.417967	0.039	0.041	1	-0.920794	0.039	0.022	2.36e-11	-1.33876	0.022	0.041	4.99e-19	-0.258424	0.041	0.037	1	-0.746224	0.041	0.019	5.65e-11	-1.00465	0.019	0.037	3.88e-05	-0.158565	0.032	0.032	1	-0.657684	0.032	0.015	5.26e-09	-0.816249	0.015	0.032	5.92e-10	-0.54513	0.051	0.068	1	-0.177128	0.051	0.039	1	-0.722258	0.039	0.068	1	-0.121898
Actr6	0.0902984	0.063	0.058	1	-0.224437	0.063	0.059	1	-0.134139	0.059	0.058	1	0.479168	0.029	0.018	1	-0.511547	0.029	0.015	1	-0.0323786	0.015	0.018	1	-0.146884	0.019	0.019	1	-0.0430494	0.019	0.014	1	-0.189933	0.014	0.019	1	-1.887	0.015	0.027	1	0.541882	0.015	0.009	1	-1.34512	0.009	0.027	1	-0.287744
Actr8	-0.0492388	0.087	0.089	1	-0.586294	0.087	0.059	3.04e-13	-0.635532	0.059	0.089	1.56e-22	-0.0504977	0.071	0.057	1	-0.28756	0.071	0.048	0.000201189	-0.338058	0.048	0.057	1	0.114197	0.053	0.044	1	-0.28016	0.053	0.028	1.6e-10	-0.165963	0.028	0.044	3.66e-05	0.948998	0.128	0.061	1	-1.12327	0.128	0.049	1	-0.174275	0.049	0.061	1	0.99681
Actrt1
Actrt2
Actrt3
Acvr1	-0.337688	0.226	0.271	7.66e-14	0.0722656	0.226	0.249	1	-0.265423	0.249	0.271	1.88e-12	0.237885	0.291	0.217	1.78e-05	-0.10081	0.291	0.24	5.65e-05	0.137076	0.24	0.217	1	0.296269	0.238	0.17	1.67e-09	-0.0126047	0.238	0.167	6.16e-20	0.283665	0.167	0.17	1	0.271937	0.652	0.575	1	0.0913264	0.652	0.587	1	0.363263	0.587	0.575	1	0.288966
Acvr1b	0.0982675	0.142	0.132	1	-0.430299	0.142	0.116	2.61e-15	-0.332032	0.116	0.132	3.27e-09	-0.12521	0.107	0.089	1	-0.196772	0.107	0.079	4.72e-06	-0.321982	0.079	0.089	0.170686	0.263395	0.054	0.04	1	-0.0708009	0.054	0.037	2.88e-08	0.192594	0.037	0.04	1	0.70695	0.107	0.085	1	-0.375456	0.107	0.068	1	0.331495	0.068	0.085	1	-0.674504
Acvr1c
Acvr2a	-0.0595641	0.288	0.29	1	0.100999	0.288	0.311	0.0233672	0.0414349	0.311	0.29	1	-0.0334524	0.153	0.125	1	0.57051	0.153	0.174	1	0.537058	0.174	0.125	0.0122063	-0.216519	0.289	0.28	1	0.698375	0.289	0.297	0.0281515	0.481855	0.297	0.28	1	0.516353	0.167	0.129	1	0.357611	0.167	0.156	1	0.873964	0.156	0.129	1	0.362284
Acvr2b	-0.163732	0.083	0.083	1	-0.72273	0.083	0.05	5.11e-50	-0.886462	0.05	0.083	9.72e-42	-0.148224	0.046	0.037	1	-0.742919	0.046	0.022	1.32e-15	-0.891143	0.022	0.037	1.86e-05	-0.136226	0.081	0.073	1	-0.616138	0.081	0.039	1.66e-31	-0.752364	0.039	0.073	3.58e-22	-0.628783	0.039	0.061	1	-0.0374896	0.039	0.025	1	-0.666272	0.025	0.061	1	-0.638793
Acvrl1													0.16713	0.228	0.163	1.77e-05	-0.384433	0.228	0.151	1.17e-15	-0.217303	0.151	0.163	1	0.0216382	0.144	0.124	1	-0.085443	0.144	0.095	4.98e-10	-0.0638047	0.095	0.124	0.0127214	-0.353025	0.071	0.071	1	0.982596	0.071	0.084	1	0.629571	0.084	0.071	1	-0.289994
Acy1	0.887372	0.032	0.018	1	-1.12826	0.032	0.016	6.9e-10	-0.240884	0.016	0.018	0.1876
Acy3
Acyp1	0.787288	0.052	0.036	1	-0.290764	0.052	0.045	0.415476	0.496524	0.045	0.036	1	-0.278126	0.015	0.016	1	-0.0426358	0.015	0.013	1	-0.320762	0.013	0.016	1	-0.39484	0.012	0.013	1	-0.290046	0.012	0.005	5.83e-06	-0.684886	0.005	0.013	0.00593757	-0.340211	0.024	0.017	1	-0.942681	0.024	0.009	1	-1.28289	0.009	0.017	1	1.96612
Acyp2	-0.305227	0.866	0.898	1.33e-93	0.240308	0.866	0.93	1.23e-76	-0.0649184	0.93	0.898	1	1.1635	0.303	0.118	1.16e-32	-0.220644	0.303	0.232	1.13e-36	0.942852	0.232	0.118	1	1.57128	0.175	0.046	7.69e-13	-0.226093	0.175	0.116	6.44e-63	1.34518	0.116	0.046	4.58e-15	3.09203	0.22	0.017	0.728838	-0.285033	0.22	0.144	1	2.807	0.144	0.017	1	1.40831
Ada					1.33276	0.008	0.018	7.09e-10	1.90905	0.018	0.005	1.5e-11
Adad1
Adad2
Adal	-0.366598	0.108	0.126	7.71e-05	0.202166	0.108	0.134	0.322887	-0.164432	0.134	0.126	1	-0.249918	0.029	0.028	1	0.0428878	0.029	0.026	1	-0.207031	0.026	0.028	1	-0.950923	0.013	0.016	1	0.76736	0.013	0.012	1	-0.183563	0.012	0.016	0.142281	-0.513662	0.018	0.017	1	0.358736	0.018	0.023	1	-0.154926	0.023	0.017	1	-0.323182
Adam10	-0.213429	0.322	0.345	0.000496534	0.199737	0.322	0.373	3.45e-09	-0.0136913	0.373	0.345	1	-0.219459	0.197	0.174	1	0.141143	0.197	0.174	0.0300522	-0.0783167	0.174	0.174	1	0.0119733	0.296	0.27	1	0.340116	0.296	0.264	1	0.352089	0.264	0.27	1	-0.192109	0.414	0.408	1	0.539079	0.414	0.422	1	0.34697	0.422	0.408	1	-0.244612
Adam11	0.885764	0.032	0.019	4.17e-05	-0.651017	0.032	0.023	0.00157762	0.234747	0.023	0.019	1
Adam12													-0.692646	0.044	0.061	1	1.1352	0.044	0.073	0.0019285	0.442553	0.073	0.061	1	-0.120879	0.068	0.067	1	0.342428	0.068	0.061	1	0.221549	0.061	0.067	1													0.413147
Adam15													0.157989	0.06	0.042	1	-0.684143	0.06	0.03	1.5e-06	-0.526153	0.03	0.042	1	0.142735	0.282	0.24	1	-0.310175	0.282	0.175	2.43e-32	-0.16744	0.175	0.24	2.63e-11	-0.449831	0.137	0.116	1	0.448616	0.137	0.111	1	-0.00121516	0.111	0.116	1	-0.775014
Adam17	0.0585292	0.176	0.165	1	0.064671	0.176	0.201	1	0.1232	0.201	0.165	1	-0.184394	0.167	0.149	1	0.202631	0.167	0.154	1	0.0182375	0.154	0.149	1	0.150101	0.137	0.111	1	0.359198	0.137	0.12	1	0.509299	0.12	0.111	1	0.0235328	0.14	0.092	1	0.377783	0.14	0.099	1	0.401316	0.099	0.092	1	-0.275868
Adam18
Adam19	-0.609194	0.137	0.179	2.94e-35	-0.584513	0.137	0.101	3.69e-14	-1.19371	0.101	0.179	1.04e-114	-0.654486	0.358	0.424	2.05e-16	0.215284	0.358	0.357	1	-0.439203	0.357	0.424	7.73e-18	-0.130003	0.197	0.194	1	-0.15873	0.197	0.14	1.35e-14	-0.288734	0.14	0.194	4.92e-20	0.303527	0.065	0.034	1	-0.56143	0.065	0.026	1	-0.257902	0.026	0.034	1	-0.453699
Adam1a	0.719374	0.014	0.008	1	-0.223438	0.014	0.02	1	0.495936	0.02	0.008	0.00572655	0.508849	0.019	0.01	1	-0.673698	0.019	0.012	1	-0.164849	0.012	0.01	1	-0.48888	0.009	0.01	1	0.0420469	0.009	0.01	1	-0.446833	0.01	0.01	1	0.46146	0.012	0.007	1	1.14355	0.012	0.025	1	1.60501	0.025	0.007	1	5.1389
Adam1b					2.07299	0.004	0.015	1.89e-06	1.7435	0.015	0.004	5.05e-13
Adam2																																					0.830741	0.021	0.01	1	-1.14481	0.021	0.007	1	-0.314069	0.007	0.01	1
Adam20
Adam21	0.207971	0.01	0.008	1	0.202839	0.01	0.012	1	0.41081	0.012	0.008	1
Adam22	-0.335917	0.385	0.42	2.38e-19	0.216171	0.385	0.429	9.34e-09	-0.119746	0.429	0.42	1	1.44067	0.025	0.005	1	1.00812	0.025	0.031	1	2.44879	0.031	0.005	1	1.61651	0.025	0.006	1	1.01276	0.025	0.027	0.0748929	2.62926	0.027	0.006	1	0.0501581	0.042	0.054	1	-0.0904639	0.042	0.047	1	-0.0403059	0.047	0.054	1	5.36663
Adam23																									-0.400799	0.046	0.041	1	0.116312	0.046	0.028	0.00797933	-0.284486	0.028	0.041	1													0.956592
Adam24
Adam25
Adam26a
Adam26b
Adam28
Adam29
Adam3
Adam30
Adam32	0.066344	0.049	0.044	1	0.0504085	0.049	0.049	1	0.116753	0.049	0.044	1	-0.954437	0.026	0.03	1	0.600871	0.026	0.025	1	-0.353567	0.025	0.03	1													1.11692	0.033	0.014	1	-0.967777	0.033	0.013	1	0.149144	0.013	0.014	1
Adam33													1.45545	0.011	0.004	1	-0.0301271	0.011	0.008	1																	0.0654209	0.19	0.194	1	-0.225836	0.19	0.137	1	-0.160415	0.137	0.194	1
Adam34
Adam39
Adam4					1.03534	0.006	0.014	7.56e-09	1.48293	0.014	0.004	5.68e-16					1.15177	0.005	0.01	1	0.881128	0.01	0.005	1																	0.557199	0.009	0.017	1	1.04088	0.017	0.007	1
Adam5													-0.268715	0.012	0.012	1	0.522722	0.012	0.012	1	0.254007	0.012	0.012	1													-1.47325	0.003	0.01	1					-0.781528	0.003	0.01	1
Adam6a
Adam6b
Adam7
Adam8
Adam9	0.128521	0.107	0.102	1	-0.101865	0.107	0.108	1	0.0266566	0.108	0.102	1	-0.077476	0.283	0.237	1	-0.231859	0.283	0.21	2.37e-12	-0.309335	0.21	0.237	0.0295487	-0.0426864	0.074	0.065	1	0.15736	0.074	0.048	8.36e-11	0.114673	0.048	0.065	0.000119617	0.546068	0.134	0.099	1	-0.296535	0.134	0.08	1	0.249533	0.08	0.099	1	-0.111632
Adamdec1
Adamts1	0.866517	0.024	0.015	0.000217862	-0.0128484	0.024	0.019	7.17e-10	0.853668	0.019	0.015	2.35e-38	-0.591839	0.045	0.05	1	1.7387	0.045	0.091	8.88e-16	1.14686	0.091	0.05	6.05e-16	0.196936	0.117	0.099	1	1.58211	0.117	0.182	9.42e-28	1.77905	0.182	0.099	1.01e-43	0.213705	0.211	0.18	1	-0.278396	0.211	0.14	1	-0.0646903	0.14	0.18	1	-0.638202
Adamts10													-0.0319632	0.72	0.648	1	-0.374506	0.72	0.588	7.34e-42	-0.40647	0.588	0.648	2.35e-27	0.151568	0.16	0.122	0.0184863	-0.112236	0.16	0.105	8.15e-32	0.0393326	0.105	0.122	3.05e-06	0.0667946	0.461	0.371	1	-0.31954	0.461	0.333	1	-0.252746	0.333	0.371	1	0.207063
Adamts12													-0.737353	0.356	0.427	8.74e-18	0.920909	0.356	0.451	1.06e-36	0.183556	0.451	0.427	1	0.0750161	0.035	0.027	1	0.128293	0.035	0.025	0.809666	0.203309	0.025	0.027	1	0.271591	0.074	0.048	1	0.290457	0.074	0.049	1	0.562047	0.049	0.048	1	-0.527989
Adamts13
Adamts14													-0.693457	0.087	0.106	1	0.210288	0.087	0.082	1	-0.483169	0.082	0.106	0.0984473
Adamts15	-0.436719	0.014	0.019	1.79e-08	-0.306466	0.014	0.011	1	-0.743184	0.011	0.019	1.44e-09	-0.732929	0.053	0.068	1	0.908322	0.053	0.071	1	0.175393	0.071	0.068	1
Adamts16
Adamts17	-0.0177723	0.076	0.079	1	0.440573	0.076	0.11	4.39e-05	0.422801	0.11	0.079	2.75e-07	-1.36978	0.012	0.024	1	1.03922	0.012	0.022	1	-0.330561	0.022	0.024	1	0.921461	0.064	0.033	1.86e-05	-0.969569	0.064	0.026	5.67e-28	-0.0481083	0.026	0.033	1	0.183514	0.137	0.15	1	-0.045836	0.137	0.121	1	0.137678	0.121	0.15	1
Adamts18
Adamts19	-0.970076	0.01	0.012	1	0.303159	0.01	0.01	1	-0.666917	0.01	0.012	1	-0.181466	0.108	0.103	1	0.0195861	0.108	0.086	1	-0.16188	0.086	0.103	1
Adamts2	0.547572	0.006	0.012	1.63e-07					-0.34771	0.007	0.012	3.76e-19	-0.350062	0.483	0.5	0.00890703	-0.115397	0.483	0.413	0.00797509	-0.465459	0.413	0.5	2.55e-22	1.06477	0.038	0.019	1	0.365271	0.038	0.037	1	1.43004	0.037	0.019	1	0.0731209	0.015	0.017	1	0.991173	0.015	0.016	1	1.06429	0.016	0.017	1	1.1529
Adamts20													-0.00701055	0.028	0.023	1	0.111437	0.028	0.023	1	0.104426	0.023	0.023	1
Adamts3	-0.33373	0.332	0.375	1.94e-18	-0.0140136	0.332	0.329	1	-0.347743	0.329	0.375	1.64e-30	0.23508	0.099	0.067	1	0.578847	0.099	0.111	1	0.813928	0.111	0.067	1													-1.14495	0.024	0.037	1	2.09129	0.024	0.052	1	0.946341	0.052	0.037	1
Adamts4
Adamts5													-0.180639	0.609	0.585	1	0.428794	0.609	0.622	8.96e-06	0.248156	0.622	0.585	0.174313	-0.214238	0.059	0.057	1	0.129403	0.059	0.037	3.91e-05	-0.084835	0.037	0.057	0.000308648	-0.285945	0.086	0.095	1	-1.09825	0.086	0.032	1	-1.3842	0.032	0.095	1	-0.194194
Adamts6	-0.25557	0.424	0.447	5.95e-14	0.295418	0.424	0.486	4.65e-25	0.039848	0.486	0.447	1	0.62485	0.2	0.104	2.36e-12	0.17997	0.2	0.167	0.132218	0.804819	0.167	0.104	0.799009	0.701565	0.099	0.047	0.00204893	-0.302917	0.099	0.056	1.73e-22	0.398648	0.056	0.047	0.707974	3.42478	0.042	0.007	1	0.171813	0.042	0.023	1	3.5966	0.023	0.007	1	-0.101193
Adamts7	-0.189106	0.22	0.23	1.19e-05	-0.650873	0.22	0.166	2.19e-40	-0.839979	0.166	0.23	2.84e-94
Adamts8
Adamts9	-1.01199	0.073	0.151	1.06e-37	0.0282195	0.073	0.085	1	-0.983774	0.085	0.151	3.21e-26	0.13817	0.044	0.029	1	0.923019	0.044	0.065	1	1.06119	0.065	0.029	0.0048731	-0.0678122	0.649	0.586	1	0.791598	0.649	0.657	1.48e-61	0.723786	0.657	0.586	5.9e-65	0.0609989	0.092	0.078	1	-1.04941	0.092	0.045	1	-0.988415	0.045	0.078	1	1.04688
Adamtsl1													-0.102761	0.098	0.096	1	0.348539	0.098	0.101	1	0.245778	0.101	0.096	1	0.148395	0.037	0.024	1	-0.519552	0.037	0.016	2.51e-07	-0.371157	0.016	0.024	1	2.084	0.033	0.017	1	-1.08054	0.033	0.013	1	1.00346	0.013	0.017	1	-0.844107
Adamtsl2													0.599885	0.167	0.109	1.14e-10	-0.00411057	0.167	0.149	1	0.595775	0.149	0.109	7.71e-05													-0.467312	0.006	0.01	1					-4.42878	0	0.01	1
Adamtsl3													-0.130809	0.547	0.507	1	-0.177476	0.547	0.443	3.17e-13	-0.308285	0.443	0.507	1.27e-10	0.737362	0.092	0.048	4.86e-10	-0.0326466	0.092	0.064	2.61e-06	0.704715	0.064	0.048	1	-0.546694	0.08	0.071	1	-0.0984367	0.08	0.057	1	-0.645131	0.057	0.071	1	-0.701023
Adamtsl4	0.930268	0.365	0.207	1.25e-146	-1.48014	0.365	0.181	0	-0.549868	0.181	0.207	1.13e-34	0.310546	0.106	0.069	0.000334905	-0.628141	0.106	0.058	1.74e-35	-0.317595	0.058	0.069	8.69e-07					6.32795	0	0.016	1	9.14868	0.016	0	1	-0.024168	0.077	0.061	1	0.306812	0.077	0.068	1	0.282644	0.068	0.061	1
Adamtsl5	-0.223307	0.498	0.52	5.47e-18	-0.395985	0.498	0.463	1.17e-28	-0.619292	0.463	0.52	1.38e-109	1.66567	0.15	0.045	6.49e-09	-0.530907	0.15	0.098	2.6e-33	1.13476	0.098	0.045	0.00274916
Adap1
Adap2													0.606697	0.433	0.287	7.89e-34	-0.192373	0.433	0.348	3.48e-13	0.414324	0.348	0.287	0.000378231													1.73482	0.027	0.007	1	-3.41126	0.027	0.004	1
Adar	-0.113753	0.229	0.239	0.240139	-0.36599	0.229	0.2	1.87e-09	-0.479743	0.2	0.239	2.24e-31	-0.140439	0.098	0.085	1	-0.414018	0.098	0.062	1.98e-12	-0.554457	0.062	0.085	1.28e-07	0.0454914	0.155	0.122	1	-0.273487	0.155	0.09	5.66e-30	-0.227996	0.09	0.122	2.73e-13	0.282009	0.196	0.153	1	-0.230387	0.196	0.124	1	0.0516222	0.124	0.153	1	0.167395
Adarb1	0.305109	0.265	0.212	3.79e-14	-0.742345	0.265	0.182	7.87e-70	-0.437236	0.182	0.212	7.62e-15	0.453448	0.215	0.14	3.79e-12	-0.130772	0.215	0.183	0.000101209	0.322676	0.183	0.14	1	-0.0843006	0.428	0.398	1	0.173186	0.428	0.365	1	0.088885	0.365	0.398	1	1.37883	0.134	0.068	1	-0.539086	0.134	0.071	1	0.839745	0.071	0.068	1	-0.0866873
Adarb2	-0.221956	0.008	0.01	1					-2.89962	0.001	0.01	6.56e-19																									-0.972081	0.009	0.014	1					-2.48696	0.001	0.014	1
Adat1	0.0664425	0.144	0.133	1	-0.587175	0.144	0.112	4.41e-21	-0.520732	0.112	0.133	9.91e-16	-0.156615	0.058	0.051	1	-0.144916	0.058	0.046	0.191319	-0.301531	0.046	0.051	1	-0.166798	0.039	0.035	1	-0.438866	0.039	0.023	4.37e-09	-0.605664	0.023	0.035	2.04e-06	-1.3862	0.051	0.082	1	0.554833	0.051	0.047	1	-0.831371	0.047	0.082	1	2.88655
Adat2																																					-2.65514	0.003	0.014	1					-5.03459	0	0.014	1
Adat3
Adck1	-0.154165	0.394	0.399	0.0217302	-0.248797	0.394	0.378	5.86e-08	-0.402962	0.378	0.399	1.52e-31	1.61171	0.037	0.012	1	-0.0451218	0.037	0.032	5.86e-11	1.56659	0.032	0.012	0.131957	1.69107	0.041	0.014	1	-0.234873	0.041	0.024	2.89e-20	1.45619	0.024	0.014	1.68e-05	3.10101	0.101	0.014	1	-0.6744	0.101	0.061	1	2.42661	0.061	0.014	1	1.64057
Adck2	-0.231908	0.104	0.11	1	0.00200717	0.104	0.111	1	-0.229901	0.111	0.11	1	0.0191835	0.03	0.025	1	-0.0991162	0.03	0.028	1	-0.0799327	0.028	0.025	1	0.793938	0.017	0.009	1	-0.156229	0.017	0.012	0.441509	0.637709	0.012	0.009	1	0.111619	0.018	0.01	1	1.06032	0.018	0.022	1	1.17194	0.022	0.01	1	0.271219
Adck5	0.815311	0.042	0.025	1	-0.751466	0.042	0.027	3.94e-13	0.063845	0.027	0.025	0.305619	0.488915	0.046	0.025	1	-0.455745	0.046	0.028	9.38e-05	0.0331708	0.028	0.025	1													0.230484	0.042	0.048	1	-0.253473	0.042	0.031	1	-0.0229891	0.031	0.048	1
Adcy1	-1.31359	0.008	0.016	8.36e-14	0.8253	0.008	0.012	0.000160744	-0.488293	0.012	0.016	1
Adcy10	0.179814	0.017	0.013	0.208637	-0.533522	0.017	0.01	0.00145117	-0.353708	0.01	0.013	5.98e-21																									0.712075	0.012	0.003	1	-1.43497	0.012	0.003	1
Adcy2													-0.325232	0.108	0.109	1	0.393717	0.108	0.118	1	0.0684843	0.118	0.109	1
Adcy3													-0.191757	0.1	0.088	1	-0.0830993	0.1	0.075	0.048945	-0.274856	0.075	0.088	1	-0.131549	0.01	0.012	1	0.402084	0.01	0.01	1	0.270535	0.01	0.012	1	1.671	0.039	0.017	1	-0.764666	0.039	0.019	1	0.906333	0.019	0.017	1	-0.51792
Adcy4													0.542078	0.028	0.016	1	-0.509721	0.028	0.016	0.115649	0.0323562	0.016	0.016	1	-0.106641	0.183	0.174	1	0.119154	0.183	0.143	0.0302397	0.0125124	0.143	0.174	1	-0.315111	0.223	0.228	1	-0.252801	0.223	0.15	1	-0.567912	0.15	0.228	1	0.190399
Adcy5	-0.301136	0.268	0.293	7.63e-09	-0.608938	0.268	0.197	5.25e-57	-0.910073	0.197	0.293	8.04e-128					2.19907	0.004	0.011	1	7.98492	0.011	0	1
Adcy6	0.343208	0.653	0.564	2.19e-44	-0.908987	0.653	0.527	2.89e-281	-0.565779	0.527	0.564	8.23e-96	0.831738	0.01	0.005	1	2.69156	0.01	0.033	1.49e-13	3.5233	0.033	0.005	0.539089					1.80652	0.009	0.02	4.02e-35	3.84225	0.02	0.002	4.56e-10	-0.634874	0.027	0.041	1	1.25571	0.027	0.038	0.400812	0.620838	0.038	0.041	1	5.82528
Adcy7													0.495452	0.402	0.272	2.18e-23	-1.00279	0.402	0.209	2.24e-99	-0.507335	0.209	0.272	1.76e-14													1.49839	0.042	0.02	1	-0.904151	0.042	0.022	1	0.594238	0.022	0.02	1
Adcy8	-0.850984	0.053	0.093	1.93e-31	0.886525	0.053	0.095	2.46e-25	0.0355417	0.095	0.093	1
Adcy9	-0.494603	0.455	0.54	1.67e-75	0.0524455	0.455	0.502	1	-0.442158	0.502	0.54	2.93e-60	0.167162	0.323	0.238	0.00107321	-0.317674	0.323	0.227	2.14e-28	-0.150512	0.227	0.238	7.52e-05	0.139973	0.164	0.125	1	0.150364	0.164	0.126	1.58e-13	0.290338	0.126	0.125	0.00544335	0.150274	0.22	0.167	1	-0.13589	0.22	0.144	1	0.0143842	0.144	0.167	1	0.174936
Adcyap1
Adcyap1r1													-0.465245	0.104	0.107	1	0.443334	0.104	0.108	1	-0.0219103	0.108	0.107	1
Add1	0.0627087	0.258	0.248	1	-0.202607	0.258	0.253	0.369378	-0.139898	0.253	0.248	0.307441	0.0385123	0.381	0.308	0.769021	-0.090758	0.381	0.311	1.16e-07	-0.0522457	0.311	0.308	1	0.0879432	0.234	0.196	1	0.00404916	0.234	0.168	3.73e-17	0.0919924	0.168	0.196	0.00141463	0.0511755	0.342	0.248	1	0.264562	0.342	0.279	1	0.315737	0.279	0.248	1	0.0765614
Add2																																					-1.13053	0.033	0.041	1	0.899613	0.033	0.028	1	-0.230913	0.028	0.041	1
Add3	-0.611327	0.257	0.343	1.1e-65	0.26723	0.257	0.311	6.45e-10	-0.344097	0.311	0.343	2.65e-24	-0.197587	0.472	0.442	1	0.156831	0.472	0.445	1	-0.0407556	0.445	0.442	1	-0.0309945	0.295	0.267	1	0.15955	0.295	0.238	1.08e-05	0.128555	0.238	0.267	0.0210114	-0.170854	0.506	0.486	1	0.336121	0.506	0.461	1	0.165267	0.461	0.486	1	-0.407021
Adgb																																					0.536801	0.021	0.01	1	-5.26142	0.021	0	1	-4.72462	0	0.01	1
Adgra1
Adgra2													0.162522	0.109	0.079	1	-0.512051	0.109	0.066	2.74e-11	-0.349529	0.066	0.079	1	0.575072	0.042	0.028	1	-0.298609	0.042	0.024	1.09e-06	0.276463	0.024	0.028	1	-0.0081854	0.381	0.34	1	0.0191823	0.381	0.332	1	0.0109969	0.332	0.34	1	0.522005
Adgra3	-0.396884	0.143	0.177	1.44e-09	0.299089	0.143	0.175	5.6e-05	-0.0977947	0.175	0.177	1	0.12796	0.102	0.077	1	0.173847	0.102	0.096	1	0.301807	0.096	0.077	1	0.111338	0.058	0.048	1	0.272885	0.058	0.045	0.289809	0.384223	0.045	0.048	1	0.19384	0.182	0.129	1	-0.256428	0.182	0.115	1	-0.0625884	0.115	0.129	1	-0.0157848
Adgrb1
Adgrb2													-0.0843499	0.01	0.009	1	0.244774	0.01	0.01	1	0.160424	0.01	0.009	1
Adgrb3																																					2.16449	0.012	0.003	1	-1.84377	0.012	0.003	1					5.30833
Adgrd1													-0.282292	0.275	0.258	1	-0.842098	0.275	0.153	4.74e-48	-1.12439	0.153	0.258	1.5e-43
Adgre1																																					-4.28371	0	0.014	1					-3.44472	0.001	0.014	1
Adgre4
Adgre5	0.264065	0.053	0.049	1	-0.422823	0.053	0.053	1.23e-07	-0.158757	0.053	0.049	1.08e-07	0.477823	0.209	0.131	2.06e-11	-0.748229	0.209	0.116	8.28e-37	-0.270405	0.116	0.131	0.985449	-0.0220475	0.281	0.245	1	-0.566667	0.281	0.148	4.69e-74	-0.588715	0.148	0.245	4.48e-45	0.490076	0.289	0.194	1	-0.521165	0.289	0.156	0.0920802	-0.0310892	0.156	0.194	1	-0.343999
Adgrf1
Adgrf2	0.407893	0.055	0.038	0.00012727	-0.283331	0.055	0.046	0.495547	0.124562	0.046	0.038	1																									-0.329457	0.012	0.01	1	1.18104	0.012	0.009	1	0.851585	0.009	0.01	1
Adgrf3
Adgrf4	0.577473	0.039	0.025	3.2e-09	-0.663144	0.039	0.024	1.11e-10	-0.0856715	0.024	0.025	1
Adgrf5													1.24985	0.013	0.005	1	0.164902	0.013	0.011	1	1.41475	0.011	0.005	1	-0.0259506	0.811	0.768	1	0.102749	0.811	0.76	1	0.0767981	0.76	0.768	1	-0.0358866	0.616	0.626	1	0.348566	0.616	0.659	1	0.312679	0.659	0.626	1	-0.0398532
Adgrg1																									0.0306242	0.198	0.18	1	0.660128	0.198	0.211	1	0.690752	0.211	0.18	1.7e-06	0.213894	0.006	0.01	1	0.757172	0.006	0.01	1	0.971067	0.01	0.01	1	-0.134851
Adgrg2													0.0464292	0.081	0.06	1	-0.107419	0.081	0.057	0.191289	-0.0609898	0.057	0.06	1													1.43257	0.012	0.007	1	-0.299205	0.012	0.006	1
Adgrg3																									0.743463	0.024	0.015	1	0.188286	0.024	0.021	1	0.931749	0.021	0.015	1	0.197651	0.048	0.037	1	-1.91317	0.048	0.009	1	-1.71552	0.009	0.037	1	0.53838
Adgrg4
Adgrg5
Adgrg6													0.559432	0.01	0.006	1	-1.54552	0.01	0.003	0.0189215					0.639167	0.012	0.006	1	0.925441	0.012	0.012	1	1.56461	0.012	0.006	1	-0.546062	0.286	0.337	1	0.125	0.286	0.224	1	-0.421062	0.224	0.337	1
Adgrg7
Adgrl1	0.43576	0.172	0.119	4.22e-22	-1.32054	0.172	0.078	8.28e-127	-0.88478	0.078	0.119	7.09e-36	0.664383	0.118	0.06	1.49e-15	-1.02173	0.118	0.053	9.96e-39	-0.357345	0.053	0.06	1	0.0461516	0.032	0.021	1	-0.834787	0.032	0.011	2.93e-21	-0.788635	0.011	0.021	8.3e-07	0.416546	0.22	0.126	1	-1.54339	0.22	0.06	5.06e-09	-1.12684	0.06	0.126	1	-0.190596
Adgrl2	-0.260011	0.508	0.552	7.55e-24	0.189353	0.508	0.572	2.73e-18	-0.0706583	0.572	0.552	1	1.62691	0.066	0.015	7.54e-07	0.253474	0.066	0.064	2.99e-05	1.88038	0.064	0.015	1	-0.191944	0.688	0.661	1	0.399497	0.688	0.667	3.6e-13	0.207552	0.667	0.661	0.0605915	-0.315736	0.485	0.507	1	0.540831	0.485	0.511	1	0.225095	0.511	0.507	1	0.0120999
Adgrl3													0.00509172	0.512	0.431	0.420438	0.54593	0.512	0.503	0.00437359	0.551022	0.503	0.431	3.26e-17													1.95547	0.021	0.01	1	-3.06694	0.021	0.001	0.82407	-1.11148	0.001	0.01	1
Adgrl4													1.15536	0.01	0.005	1	-0.155735	0.01	0.007	1.99e-06					-0.200533	0.799	0.786	0.0250474	0.673892	0.799	0.847	1.49e-142	0.473359	0.847	0.786	2.45e-80	0.592005	0.393	0.31	1	0.29439	0.393	0.393	1	0.886395	0.393	0.31	1	-0.344639
Adgrv1					1.33297	0.009	0.02	1.9e-07	1.7503	0.02	0.005	2.24e-11	-0.36884	0.021	0.026	1	0.156162	0.021	0.019	1	-0.212678	0.019	0.026	1	1.33892	0.011	0.005	1	-2.34839	0.011	0.001	2.08e-07																	0.133274
Adh1																									0.969517	0.051	0.024	6.83e-08	-1.60529	0.051	0.013	1.09e-47	-0.635771	0.013	0.024	0.000513215	-0.119051	0.116	0.116	1	0.645528	0.116	0.14	1	0.526477	0.14	0.116	1
Adh4
Adh5	0.0420683	0.048	0.045	1	-0.422737	0.048	0.04	1	-0.380669	0.04	0.045	1	0.128422	0.018	0.015	1	-0.558682	0.018	0.01	1	-0.43026	0.01	0.015	1	0.0596039	0.036	0.027	1	-0.602099	0.036	0.014	8.16e-12	-0.542495	0.014	0.027	1.04e-06	-1.42129	0.033	0.041	1	-0.0588035	0.033	0.019	1	-1.48009	0.019	0.041	1	0.890279
Adh6a
Adh6b																																					-1.25208	0.036	0.044	1	1.40377	0.036	0.048	1	0.151694	0.048	0.044	1
Adh7
Adhfe1	0.00671059	0.448	0.436	1	-0.0540628	0.448	0.475	1	-0.0473522	0.475	0.436	1	-0.763324	0.045	0.056	1	0.738825	0.045	0.064	1	-0.0244992	0.064	0.056	1	3.99186	0.01	0.001	1	1.2827	0.01	0.018	0.00153042	5.27456	0.018	0.001	1
Adi1	-0.765313	0.018	0.024	1	-0.204261	0.018	0.013	0.0200861	-0.969574	0.013	0.024	3.4e-06																													0.711093	0.009	0.01	1	0.966544	0.01	0.007	1
Adig	0.307446	0.01	0.009	1	-1.54085	0.01	0.004	1.6e-05
Adipoq
Adipor1	0.511656	0.089	0.064	1	-1.36411	0.089	0.038	2.49e-13	-0.852456	0.038	0.064	1.49e-08	-0.183335	0.072	0.063	1	0.124689	0.072	0.057	1	-0.0586459	0.057	0.063	1	-0.11369	0.151	0.144	1	-0.124436	0.151	0.093	1.12e-15	-0.238126	0.093	0.144	3.41e-17	0.156694	0.113	0.085	1	0.413612	0.113	0.099	1	0.570306	0.099	0.085	1	-0.439369
Adipor2	-0.00880599	0.14	0.141	1	0.070579	0.14	0.163	1	0.061773	0.163	0.141	1	0.246225	0.081	0.053	1	0.0998823	0.081	0.068	0.234845	0.346107	0.068	0.053	1	0.465453	0.414	0.301	1.3e-23	-0.437025	0.414	0.266	1.08e-57	0.0284278	0.266	0.301	1	0.220755	0.304	0.255	1	0.422618	0.304	0.303	1	0.643374	0.303	0.255	1	0.493691
Adk	-0.207393	0.902	0.918	8.57e-63	0.324326	0.902	0.957	3.78e-181	0.116933	0.957	0.918	5.56e-20	0.168519	0.375	0.288	2.44e-05	0.728049	0.375	0.486	2.62e-12	0.896567	0.486	0.288	3.41e-36					1.46053	0.008	0.013	1.1e-155	9.21514	0.013	0	1.33e-115	0.107963	0.503	0.466	1	0.365339	0.503	0.475	1	0.473302	0.475	0.466	1	0.462638
Adm													-0.461576	0.045	0.047	1	1.53458	0.045	0.096	3.86e-16	1.07301	0.096	0.047	2.55e-15	0.0114331	0.02	0.015	1	1.13214	0.02	0.023	1	1.14358	0.023	0.015	1
Adm2
Adnp	0.218636	0.12	0.09	7.28e-18	0.804246	0.12	0.256	6.02e-126	1.02288	0.256	0.09	1.26e-243	0.268077	0.153	0.099	2.26e-06	0.261536	0.153	0.173	1	0.529613	0.173	0.099	1.71e-13	0.360488	0.084	0.054	8.26e-06	0.870529	0.084	0.167	4.27e-31	1.23102	0.167	0.054	6.63e-72	-0.154719	0.083	0.102	1	1.00179	0.083	0.242	0.0104598	0.847074	0.242	0.102	0.0681777	0.584505
Adnp2	0.403608	0.101	0.085	0.112425	-0.563524	0.101	0.08	5.6e-07	-0.159916	0.08	0.085	1	0.260618	0.049	0.033	0.576633	-0.114796	0.049	0.038	0.33426	0.145822	0.038	0.033	1	0.139313	0.046	0.04	1	-0.0626447	0.046	0.031	0.000209299	0.0766684	0.031	0.04	1	-0.644299	0.051	0.061	1	-0.208848	0.051	0.023	1	-0.853147	0.023	0.061	1	0.225627
Ado													0.101578	0.015	0.013	1	0.108929	0.015	0.014	1	0.210506	0.014	0.013	1	0.711527	0.012	0.008	1	-0.204438	0.012	0.006	1					1.86507	0.021	0.007	1	-1.67535	0.021	0.009	1					1.96546
Adora1	0.378697	0.116	0.089	1.29e-09	-0.862072	0.116	0.068	3.9e-48	-0.483375	0.068	0.089	8.48e-09
Adora2a													0.591969	0.015	0.009	1	-1.22854	0.015	0.005	1.53e-05					-0.218823	0.099	0.103	1	-0.478149	0.099	0.053	1.39e-21	-0.696972	0.053	0.103	6.36e-26													2.25908
Adora2b
Adora3
Adpgk	-0.121025	0.105	0.104	1	0.0477848	0.105	0.117	1	-0.0732403	0.117	0.104	1	-0.0784116	0.04	0.032	1	-0.0348319	0.04	0.033	1	-0.113244	0.033	0.032	1	-0.00231484	0.024	0.022	1	0.259422	0.024	0.02	1	0.257107	0.02	0.022	1	0.845404	0.036	0.01	1	0.462484	0.036	0.029	1	1.30789	0.029	0.01	1
Adprh	0.118255	0.029	0.025	1	-0.981382	0.029	0.015	1	-0.863127	0.015	0.025	1	-0.332266	0.035	0.033	1	0.343173	0.035	0.035	1	0.0109072	0.035	0.033	1	0.170393	0.028	0.021	1	0.153517	0.028	0.017	0.0846558	0.32391	0.017	0.021	1	0.557914	0.036	0.027	1	0.326695	0.036	0.029	1	0.884609	0.029	0.027	1	-2.52603
Adprhl1	0.0438621	0.51	0.498	1	-0.0789444	0.51	0.522	1	-0.0350823	0.522	0.498	1													-1.38026	0.007	0.015	2.71e-05					-0.136015	0.007	0.015	1.25e-23	-3.69694	0	0.01	1					-4.72879	0	0.01	1	-2.75851
Adprhl2	0.409235	0.075	0.053	0.496128	-0.993973	0.075	0.041	2.39e-37	-0.584738	0.041	0.053	1.33e-15	-0.0226018	0.054	0.042	1	-0.703881	0.054	0.025	1.59e-15	-0.726483	0.025	0.042	7.61e-06	-0.0635159	0.033	0.027	1	-0.0925244	0.033	0.02	1.16e-07	-0.15604	0.02	0.027	8.96e-06	1.20484	0.051	0.014	1	-0.349474	0.051	0.023	1	0.855364	0.023	0.014	1	-0.207942
Adprm	0.014086	0.154	0.139	1	-0.17219	0.154	0.142	4.64e-05	-0.158104	0.142	0.139	0.0615828	0.460755	0.031	0.019	1	-0.459597	0.031	0.018	2.92e-09	0.00115799	0.018	0.019	8.88e-05	0.786014	0.032	0.017	1	-0.707537	0.032	0.013	9.2e-16	0.0784769	0.013	0.017	4.72e-06	-0.111257	0.033	0.031	1	0.218172	0.033	0.022	1	0.106915	0.022	0.031	1	-1.27789
Adra1a	-0.0383018	0.581	0.556	1	-0.0251573	0.581	0.602	1	-0.0634591	0.602	0.556	1					4.24621	0.003	0.042	1	3.09047	0.042	0.005	1
Adra1b	-0.967036	0.23	0.35	1.6e-133	0.820588	0.23	0.346	2.21e-103	-0.146447	0.346	0.35	0.317485
Adra1d
Adra2a
Adra2b
Adra2c																																																	-0.386393
Adrb1	-0.260873	0.27	0.29	0.00750687	-0.039373	0.27	0.288	1	-0.300247	0.288	0.29	1
Adrb2																									-0.122021	0.017	0.012	1	0.586616	0.017	0.013	1	0.464595	0.013	0.012	1													-0.766222
Adrb3
Adrm1	0.975462	0.04	0.021	1.48e-06	-0.952318	0.04	0.023	1.18e-05	0.0231438	0.023	0.021	1	0.0827353	0.011	0.009	1	0.698822	0.011	0.018	1	0.781557	0.018	0.009	1	0.634015	0.019	0.012	1	0.217667	0.019	0.018	1	0.851682	0.018	0.012	1	1.50391	0.021	0.014	1	-2.24072	0.021	0.006	1	-0.736811	0.006	0.014	1	0.504214
Adsl	0.00652463	0.156	0.139	1	-0.624373	0.156	0.114	4.9e-41	-0.617849	0.114	0.139	2.56e-29	-0.404177	0.04	0.044	1	-0.148348	0.04	0.032	7.45e-08	-0.552525	0.032	0.044	3.35e-08	0.0235829	0.033	0.024	1	0.156613	0.033	0.022	3.68e-10	0.180196	0.022	0.024	4.6e-05	0.138381	0.054	0.034	1	0.169894	0.054	0.042	1	0.308274	0.042	0.034	1	-0.311306
Adss	0.126911	0.15	0.131	1	-0.302062	0.15	0.13	0.00364538	-0.175151	0.13	0.131	1.15e-05	0.328565	0.104	0.072	1	0.103789	0.104	0.091	1	0.432353	0.091	0.072	1	-0.0677683	0.105	0.097	1	0.427364	0.105	0.091	1	0.359596	0.091	0.097	1	-0.447268	0.131	0.143	1	0.770535	0.131	0.148	1	0.323266	0.148	0.143	1	-1.1538
Adssl1	0.384526	0.191	0.143	5.07e-09	-0.612929	0.191	0.131	2.25e-34	-0.228403	0.131	0.143	0.00148724
Adtrp
Aebp1													0.675387	0.134	0.072	2.87e-14	-1.07971	0.134	0.056	5.07e-38	-0.404328	0.056	0.072	1	-0.465664	0.011	0.011	1	-0.245534	0.011	0.006	1	-0.711198	0.006	0.011	1	-0.946213	0.027	0.031	1	0.849272	0.027	0.026	1	-0.0969403	0.026	0.031	1	1.36453
Aebp2	0.188221	0.286	0.251	0.0263209	-0.431526	0.286	0.239	1.04e-25	-0.243305	0.239	0.251	8.04e-06	-0.0258659	0.166	0.129	1	-0.300464	0.166	0.114	1.97e-13	-0.32633	0.114	0.129	0.0720355	-0.309949	0.112	0.117	1	0.201839	0.112	0.085	3.36e-06	-0.10811	0.085	0.117	2.46e-12	0.320692	0.164	0.173	1	-0.454287	0.164	0.112	1	-0.133596	0.112	0.173	1	-0.197691
Aen	0.00462389	0.051	0.046	1	-0.525505	0.051	0.034	1.08e-09	-0.520881	0.034	0.046	6.07e-05	-0.0802711	0.037	0.031	1	-0.324016	0.037	0.022	0.000995348	-0.404287	0.022	0.031	1	-0.160513	0.025	0.02	1	0.202173	0.025	0.018	1	0.0416602	0.018	0.02	1	-0.261414	0.03	0.027	1	0.090862	0.03	0.026	1	-0.170552	0.026	0.027	1	0.676637
AF067061
AF067063
AF366264
Afap1	-0.239551	0.272	0.295	9.97e-06	-0.181336	0.272	0.26	2.06e-08	-0.420887	0.26	0.295	5.68e-40	0.0874654	0.311	0.249	0.908794	-0.306935	0.311	0.234	1.32e-17	-0.21947	0.234	0.249	0.0137875	0.252279	0.164	0.124	1	-0.222312	0.164	0.098	1.2e-35	0.029967	0.098	0.124	9.13e-13	-0.256198	0.152	0.204	1	0.0173954	0.152	0.137	1	-0.238803	0.137	0.204	1	-0.170564
Afap1l1	0.000768203	0.354	0.347	1	-0.358571	0.354	0.317	6.24e-23	-0.357803	0.317	0.347	1.27e-29													0.049231	0.536	0.478	1	-0.141741	0.536	0.414	1.12e-17	-0.0925099	0.414	0.478	1.42e-05	0.294573	0.565	0.507	1	-0.201076	0.565	0.479	1	0.0934971	0.479	0.507	1	0.0768743
Afap1l2													-0.888763	0.026	0.039	1	0.0363085	0.026	0.021	1	-0.852455	0.021	0.039	0.00401264													0.974589	0.033	0.014	1	-1.38927	0.033	0.015	1	-0.414682	0.015	0.014	1	-0.265021
Afdn	-0.346672	0.355	0.414	3.71e-32	-0.183116	0.355	0.348	1	-0.529788	0.348	0.414	8.57e-60	0.178677	0.35	0.262	1.65e-05	-0.144027	0.35	0.278	1.22e-11	0.0346503	0.278	0.262	1	-0.0786298	0.712	0.682	1	0.183975	0.712	0.682	1	0.105345	0.682	0.682	1	-0.213119	0.411	0.405	1	-0.0174445	0.411	0.341	1	-0.230563	0.341	0.405	1	-0.124621
Aff1	-0.209203	0.548	0.583	6.32e-17	0.0294129	0.548	0.595	1	-0.17979	0.595	0.583	7.61e-07	0.0875654	0.464	0.385	0.0182332	-0.0325279	0.464	0.418	0.00773752	0.0550375	0.418	0.385	1	0.34073	0.245	0.172	4.79e-07	0.000475106	0.245	0.184	2.54e-26	0.341205	0.184	0.172	1	0.0353286	0.482	0.418	1	0.00425827	0.482	0.386	1	0.0395868	0.386	0.418	1	0.0489548
Aff2	0.091185	0.334	0.302	1	0.235318	0.334	0.371	0.000517087	0.326503	0.371	0.302	1.26e-17	0.682735	0.046	0.022	0.142965	1.17782	0.046	0.065	1	1.86055	0.065	0.022	0.000236234													0.901995	0.03	0.027	1	-1.27105	0.03	0.007	1	-0.36905	0.007	0.027	1
Aff3	-0.239578	0.01	0.017	1	0.909841	0.01	0.035	1	0.670263	0.035	0.017	1	0.204322	0.466	0.362	6.46e-09	-0.340958	0.466	0.345	2.55e-23	-0.136636	0.345	0.362	1													0.695687	0.101	0.041	1	-1.62995	0.101	0.028	0.0018118	-0.934258	0.028	0.041	1
Aff4	0.133156	0.436	0.397	1	0.286153	0.436	0.52	6.33e-40	0.419309	0.52	0.397	9.5e-68	0.0534064	0.395	0.318	0.294812	0.339362	0.395	0.409	1	0.392769	0.409	0.318	2.25e-10	0.0475443	0.286	0.24	1	0.596985	0.286	0.292	1	0.644529	0.292	0.24	2.33e-06	0.106237	0.491	0.422	1	-0.000732025	0.491	0.406	1	0.105505	0.406	0.422	1	0.229522
Afg1l	-0.365083	0.489	0.554	7.35e-42	0.123592	0.489	0.547	3.81e-06	-0.24149	0.547	0.554	1.11e-15	-0.0640304	0.155	0.128	1	0.123999	0.155	0.142	1.08e-05	0.059969	0.142	0.128	1	0.082704	0.249	0.203	1	0.209514	0.249	0.202	5.44e-05	0.292218	0.202	0.203	1	-0.239458	0.25	0.241	1	0.352054	0.25	0.245	1	0.112595	0.245	0.241	1	0.301881
Afg3l1	-0.020162	0.115	0.093	0.000313106	0.0135578	0.115	0.147	0.00309084	-0.00660418	0.147	0.093	1.37e-25	0.0229943	0.091	0.073	1	-0.14096	0.091	0.083	1	-0.117966	0.083	0.073	1	0.079904	0.032	0.024	1	0.384809	0.032	0.043	1	0.464713	0.043	0.024	0.0920451	0.784781	0.045	0.024	1	0.422428	0.045	0.058	1	1.20721	0.058	0.024	1	0.718105
Afg3l2	0.112951	0.447	0.404	0.295984	-0.20995	0.447	0.435	1.33e-05	-0.0969989	0.435	0.404	1	0.923619	0.042	0.018	1	0.427724	0.042	0.046	1.12e-07	1.35134	0.046	0.018	1	0.12828	0.031	0.027	1	0.524071	0.031	0.026	1.65e-13	0.652351	0.026	0.027	7.05e-20	-0.484949	0.074	0.082	1	0.338614	0.074	0.07	1	-0.146335	0.07	0.082	1	0.379434
Afm
Afmid	-0.29411	0.054	0.05	1	0.78522	0.054	0.109	7e-31	0.491109	0.109	0.05	4.25e-36	-0.268043	0.03	0.026	1	0.195268	0.03	0.035	1	-0.0727751	0.035	0.026	1					0.554988	0.007	0.012	1	0.882758	0.012	0.004	1	2.07067	0.033	0.007	1	0.0117839	0.033	0.032	1	2.08245	0.032	0.007	1	1.9849
Afp
Aftph	-0.109313	0.321	0.327	1	0.00821989	0.321	0.343	1	-0.101093	0.343	0.327	1	-0.274436	0.178	0.173	1	0.243362	0.178	0.174	1	-0.031074	0.174	0.173	1	0.190953	0.145	0.115	1	0.193694	0.145	0.108	8.02e-14	0.384647	0.108	0.115	0.0299312	-0.489885	0.17	0.197	1	0.647494	0.17	0.157	1	0.157609	0.157	0.197	1	-0.182129
Aga	-0.0716422	0.058	0.07	1	-0.959608	0.058	0.035	3.78e-09	-1.03125	0.035	0.07	1.6e-25	-0.108433	0.034	0.029	1	-0.130992	0.034	0.026	1	-0.239425	0.026	0.029	1	0.448403	0.019	0.011	1	-0.254202	0.019	0.008	0.000253094	0.194201	0.008	0.011	1	-1.87034	0.027	0.037	1	1.37167	0.027	0.025	1	-0.498669	0.025	0.037	1	0.791013
Agap1	-0.20327	0.555	0.584	4.69e-12	-0.241243	0.555	0.549	6.06e-14	-0.444513	0.549	0.584	7.53e-67	-0.454369	0.43	0.443	0.173415	0.0957021	0.43	0.405	1	-0.358667	0.405	0.443	6.31e-13	0.246787	0.581	0.477	2.98e-11	-0.271712	0.581	0.442	9.39e-36	-0.0249249	0.442	0.477	0.293156	0.516892	0.69	0.595	1	-0.505702	0.69	0.524	0.0520242	0.01119	0.524	0.595	1	-0.176369
Agap2
Agap3	0.186221	0.197	0.176	1	-1.18612	0.197	0.104	2.55e-127	-0.999897	0.104	0.176	1.87e-107	0.0276518	0.169	0.138	1	-0.551942	0.169	0.1	8.84e-27	-0.52429	0.1	0.138	2.25e-11	0.00525892	0.169	0.151	1	-0.0363409	0.169	0.122	1.23e-11	-0.031082	0.122	0.151	3.37e-06	0.188152	0.214	0.19	1	-1.17236	0.214	0.082	1.67e-05	-0.984203	0.082	0.19	0.0216751	0.0420118
Agbl1	0.174321	0.037	0.033	1	0.284211	0.037	0.04	1	0.458532	0.04	0.033	1	0.173922	0.017	0.01	1	0.000902504	0.017	0.009	1	0.174825	0.009	0.01	1													-0.337782	0.024	0.014	1	-0.479403	0.024	0.007	1	-0.817184	0.007	0.014	1
Agbl2	0.200475	0.064	0.052	1	-0.00436931	0.064	0.069	1	0.196105	0.069	0.052	1
Agbl3	-0.147287	0.087	0.093	1	0.0363796	0.087	0.092	1	-0.110907	0.092	0.093	1	-0.0353804	0.055	0.044	1	0.286667	0.055	0.054	1	0.251287	0.054	0.044	1	0.100392	0.039	0.029	1	-0.201518	0.039	0.02	1.18e-10	-0.101125	0.02	0.029	0.246137	0.0378916	0.071	0.051	1	0.568988	0.071	0.077	1	0.60688	0.077	0.051	1	0.763395
Agbl4	0.368566	0.143	0.114	3.04e-06	-0.0601747	0.143	0.131	0.00684993	0.308391	0.131	0.114	1																									-0.105824	0.012	0.007	1	-1.44087	0.012	0.003	1					-0.687837
Agbl5	-0.0462812	0.07	0.062	1	-0.280847	0.07	0.058	0.0021344	-0.327128	0.058	0.062	0.021884	0.347344	0.02	0.012	1	0.68982	0.02	0.026	1	1.03716	0.026	0.012	1	0.661991	0.026	0.018	1	-0.196573	0.026	0.017	0.587091	0.465418	0.017	0.018	1	-1.07973	0.03	0.058	1	0.508288	0.03	0.028	1	-0.571441	0.028	0.058	1	-0.169005
Ager																																					4.52558	0.024	0	1	-1.98948	0.024	0.003	1
Agfg1	0.00570328	0.249	0.243	1	0.212492	0.249	0.304	1.47e-12	0.218195	0.304	0.243	3.74e-09	-0.0380894	0.205	0.177	1	0.334343	0.205	0.213	1	0.296254	0.213	0.177	1	0.138994	0.161	0.123	1	0.3107	0.161	0.134	0.122631	0.449694	0.134	0.123	1	-0.183674	0.253	0.269	1	0.455573	0.253	0.266	1	0.271899	0.266	0.269	1	0.0126436
Agfg2	-0.0521734	0.097	0.094	1	-0.103116	0.097	0.095	1	-0.15529	0.095	0.094	1	-0.50883	0.063	0.07	1	0.199546	0.063	0.061	1	-0.309284	0.061	0.07	1	0.356395	0.046	0.034	1	-0.334125	0.046	0.026	1.07e-09	0.0222704	0.026	0.034	0.322676	-1.03066	0.009	0.017	1	0.351004	0.009	0.015	1	-0.679656	0.015	0.017	1	1.69388
Aggf1	0.238989	0.101	0.088	1	-0.994868	0.101	0.058	3.22e-35	-0.755879	0.058	0.088	6.99e-19	-0.208857	0.077	0.066	1	-0.335891	0.077	0.049	3.83e-08	-0.544749	0.049	0.066	1	0.10459	0.088	0.076	1	-0.0589816	0.088	0.055	1.25e-09	0.0456085	0.055	0.076	0.0100104	-0.45492	0.08	0.109	1	-0.649024	0.08	0.044	1	-1.10394	0.044	0.109	1	-0.232582
Agk	-0.17742	0.115	0.129	0.014047	0.396992	0.115	0.156	1.17e-15	0.219572	0.156	0.129	1	0.0916976	0.162	0.125	1	0.251575	0.162	0.155	1	0.343273	0.155	0.125	1	0.185238	0.085	0.067	1	0.360088	0.085	0.074	1	0.545325	0.074	0.067	1	-0.277491	0.131	0.143	1	0.792674	0.131	0.14	1	0.515183	0.14	0.143	1	-0.760302
Agl	-0.164776	0.674	0.692	3.23e-14	-0.0263825	0.674	0.714	1	-0.191159	0.714	0.692	7.47e-11	0.579845	0.049	0.023	1	0.638534	0.049	0.057	1.82e-07	1.21838	0.057	0.023	9.35e-05	3.09097	0.03	0.003	1	-0.856093	0.03	0.01	1.49e-32	2.23488	0.01	0.003	5.48e-31	2.13564	0.06	0.014	1	0.0161137	0.06	0.044	1	2.15176	0.044	0.014	1	5.91051
Agmat
Agmo													0.025714	0.561	0.494	1	0.434423	0.561	0.579	4.83e-10	0.460137	0.579	0.494	8.44e-22	0.361103	0.254	0.187	4.22e-10	0.298385	0.254	0.217	1	0.659488	0.217	0.187	0.00700438	0.0478585	0.143	0.139	1	0.364952	0.143	0.122	1	0.412811	0.122	0.139	1	0.44855
Ago1	0.0483371	0.099	0.097	1	-0.127933	0.099	0.092	1	-0.0795962	0.092	0.097	1	0.341784	0.069	0.048	1	-0.158066	0.069	0.049	0.0133387	0.183718	0.049	0.048	1	0.264841	0.044	0.033	1	-0.295686	0.044	0.024	5.1e-10	-0.0308449	0.024	0.033	0.00137675	-0.140657	0.054	0.061	1	0.222939	0.054	0.052	1	0.0822822	0.052	0.061	1	-0.0171352
Ago2	0.124358	0.233	0.212	1	-0.582791	0.233	0.179	1.43e-49	-0.458432	0.179	0.212	2.13e-39	0.167088	0.272	0.212	0.00141402	-0.545295	0.272	0.176	6.53e-36	-0.378207	0.176	0.212	6.97e-08	-0.0163199	0.146	0.128	1	-0.497016	0.146	0.078	2.85e-39	-0.513336	0.078	0.128	6.32e-31	0.594206	0.232	0.17	1	-0.697628	0.232	0.121	0.11681	-0.103423	0.121	0.17	1	0.155608
Ago3	-0.0839198	0.348	0.353	1	0.152258	0.348	0.412	9.19e-13	0.0683384	0.412	0.353	0.149786	-0.0399748	0.333	0.279	1	0.148819	0.333	0.311	1	0.108844	0.311	0.279	1	-0.00402454	0.231	0.209	1	0.554049	0.231	0.237	1	0.550024	0.237	0.209	1	0.415135	0.372	0.272	1	0.320078	0.372	0.342	1	0.735213	0.342	0.272	1	0.146638
Ago4	-0.212622	0.146	0.164	1	-0.0394465	0.146	0.149	1	-0.252069	0.149	0.164	7.83e-07	-0.0748015	0.092	0.079	1	-0.0614268	0.092	0.075	1	-0.136228	0.075	0.079	1	-0.185002	0.045	0.042	1	0.276817	0.045	0.034	0.0119795	0.0918153	0.034	0.042	0.161801	-1.35727	0.03	0.041	1	0.604711	0.03	0.026	1	-0.752556	0.026	0.041	1	-0.393797
Agpat1	0.399775	0.045	0.034	1	-1.49915	0.045	0.018	5.16e-20	-1.09937	0.018	0.034	6.06e-10	0.288596	0.02	0.015	1	-1.19807	0.02	0.008	0.000179598	-0.909471	0.008	0.015	1	0.517511	0.018	0.014	1	-0.227963	0.018	0.01	0.0203225	0.289548	0.01	0.014	1	1.14506	0.018	0.01	1	1.61517	0.018	0.023	1	2.76023	0.023	0.01	1	-0.762072
Agpat2	0.396294	0.103	0.074	1	-0.419519	0.103	0.08	0.0120018	-0.0232253	0.08	0.074	1													0.0711306	0.012	0.01	1	0.591601	0.012	0.016	1	0.662732	0.016	0.01	1	-0.220811	0.033	0.041	1	-0.585556	0.033	0.019	1	-0.806367	0.019	0.041	1	0.0858394
Agpat3	-0.178205	0.348	0.358	4.1e-06	0.027387	0.348	0.376	1	-0.150818	0.376	0.358	1	0.381653	0.178	0.111	0.00252467	-0.463278	0.178	0.11	6.84e-26	-0.0816245	0.11	0.111	0.00044952	0.514968	0.063	0.045	1	-0.232252	0.063	0.039	1.82e-13	0.282716	0.039	0.045	4.75e-08	-0.853115	0.131	0.177	1	0.221045	0.131	0.093	1	-0.63207	0.093	0.177	1	0.484373
Agpat4													-0.0688636	0.181	0.156	1	-0.367446	0.181	0.121	3.81e-14	-0.436309	0.121	0.156	7.56e-05	-0.153748	0.102	0.088	1	0.106165	0.102	0.07	8.93e-06	-0.0475835	0.07	0.088	0.279348	-0.165349	0.14	0.129	1	-0.373429	0.14	0.086	1	-0.538778	0.086	0.129	1	-0.402887
Agpat5	-0.281353	0.11	0.13	1	0.0359567	0.11	0.121	1	-0.245396	0.121	0.13	1	-0.206117	0.067	0.064	1	-0.385242	0.067	0.043	1.17e-07	-0.59136	0.043	0.064	0.00203172	-0.556486	0.043	0.048	1	0.339644	0.043	0.031	0.000119625	-0.216842	0.031	0.048	3.05e-09	-0.23538	0.071	0.058	1	0.0395039	0.071	0.055	1	-0.195876	0.055	0.058	1	-0.534139
Agps	-0.0533571	0.229	0.24	1	0.552387	0.229	0.335	4.03e-63	0.49903	0.335	0.24	5.78e-41	0.0149921	0.188	0.155	1	0.406584	0.188	0.202	1	0.421576	0.202	0.155	0.0449995	0.0129506	0.146	0.122	1	0.528144	0.146	0.133	1	0.541095	0.133	0.122	1	-0.914515	0.146	0.201	1	0.884455	0.146	0.173	1	-0.0300599	0.173	0.201	1	0.323793
Agr2
Agr3
Agrn	0.438446	0.338	0.254	6.97e-38	-0.68298	0.338	0.272	2.18e-55	-0.244534	0.272	0.254	1	2.1365	0.01	0.002	1	0.79614	0.01	0.009	6.22e-05					0.241773	0.147	0.108	0.0124718	-0.431402	0.147	0.079	1.45e-44	-0.189629	0.079	0.108	1.91e-12	0.911524	0.193	0.085	1	-0.53071	0.193	0.1	0.982395	0.380814	0.1	0.085	1	0.238995
Agrp	0.300874	0.076	0.058	1	0.767682	0.076	0.132	3.31e-28	1.06856	0.132	0.058	1.2e-23	0.168015	0.09	0.062	1	0.171467	0.09	0.085	1	0.339481	0.085	0.062	1	0.101956	0.117	0.1	1	0.33302	0.117	0.104	1	0.434976	0.104	0.1	1	-0.594265	0.068	0.058	1	1.6615	0.068	0.115	1	1.06723	0.115	0.058	1	-0.14781
Agt
Agtpbp1	0.315089	0.597	0.544	2.05e-22	-0.738125	0.597	0.514	2.78e-145	-0.423037	0.514	0.544	5.59e-48	-0.131863	0.106	0.094	0.0626446	0.239176	0.106	0.116	1.12e-17	0.107313	0.116	0.094	0.198137	0.172359	0.153	0.116	0.000298113	0.199597	0.153	0.123	4.49e-28	0.371956	0.123	0.116	0.0102999	-0.281772	0.164	0.207	1	0.578755	0.164	0.194	1	0.296983	0.194	0.207	1	-0.0527354
Agtr1a	-0.463657	0.449	0.521	1.79e-60	0.144031	0.449	0.481	1	-0.319626	0.481	0.521	1.14e-40
Agtr1b
Agtr2
Agtrap	-0.246498	0.04	0.051	0.674505	-0.650876	0.04	0.029	0.00382169	-0.897374	0.029	0.051	5.84e-19	-0.0694257	0.061	0.055	1	-0.855765	0.061	0.03	1.35e-11	-0.92519	0.03	0.055	1.25e-08	0.201049	0.048	0.037	1	-0.290162	0.048	0.027	5.12e-08	-0.0891132	0.027	0.037	0.00810285	-0.322336	0.098	0.082	1	0.346937	0.098	0.071	1	0.024601	0.071	0.082	1	-0.234136
Agxt
Agxt2
Ahctf1	0.116622	0.3	0.261	0.030366	-0.295165	0.3	0.273	1.12e-13	-0.178543	0.273	0.261	1	0.129263	0.246	0.19	0.0888371	-0.0721356	0.246	0.204	0.000345122	0.0571273	0.204	0.19	1	-0.0208418	0.187	0.161	1	0.199329	0.187	0.145	0.00016929	0.178488	0.145	0.161	0.909587	0.410631	0.315	0.259	1	-0.423595	0.315	0.202	1	-0.0129632	0.202	0.259	1	0.336243
Ahcy
Ahcyl1	-0.03646	0.322	0.307	1	0.134768	0.322	0.361	3.49e-09	0.0983084	0.361	0.307	9.14e-05	0.166391	0.227	0.169	0.465537	0.254086	0.227	0.226	1	0.420477	0.226	0.169	0.451533	0.103603	0.113	0.088	1	0.268781	0.113	0.091	0.000995657	0.372384	0.091	0.088	1	-0.294053	0.208	0.214	1	0.554744	0.208	0.202	1	0.260691	0.202	0.214	1	-0.588852
Ahcyl2	-0.239327	0.299	0.326	8.88e-09	0.264894	0.299	0.342	1.07e-05	0.0255668	0.342	0.326	1	0.0518936	0.108	0.083	1	0.197222	0.108	0.097	1	0.249115	0.097	0.083	1	0.267601	0.115	0.084	1	0.15361	0.115	0.091	0.00640991	0.421211	0.091	0.084	1	-0.188374	0.143	0.153	1	0.35011	0.143	0.108	1	0.161736	0.108	0.153	1	-0.465879
Ahdc1	-0.330399	0.39	0.437	2.44e-26	-0.356492	0.39	0.355	3.99e-22	-0.686891	0.355	0.437	7.87e-115	0.305085	0.327	0.223	1.16e-09	-0.873173	0.327	0.171	3.21e-79	-0.568088	0.171	0.223	2.01e-22	0.309756	0.165	0.117	1	-0.512589	0.165	0.09	8.65e-50	-0.202833	0.09	0.117	1.42e-22	-0.0083536	0.247	0.197	1	-0.10114	0.247	0.163	1	-0.109494	0.163	0.197	1	0.781367
Ahi1	0.0217701	0.134	0.128	1	0.0528403	0.134	0.144	1	0.0746104	0.144	0.128	1	-0.174338	0.137	0.125	1	0.0703394	0.137	0.116	1	-0.103999	0.116	0.125	1	1.03749	0.023	0.01	1	-0.498751	0.023	0.011	0.000230085	0.538742	0.011	0.01	1	0.608775	0.06	0.024	1	0.049656	0.06	0.047	1	0.658431	0.047	0.024	1	0.72442
Ahnak	0.819957	0.376	0.262	5.46e-75	-2.68185	0.376	0.087	0	-1.86189	0.087	0.262	4.08e-208	0.316677	0.507	0.382	4.47e-17	-1.02454	0.507	0.265	4.33e-138	-0.707858	0.265	0.382	1.96e-39	0.114559	0.498	0.424	0.00116111	-1.01641	0.498	0.242	4.3e-201	-0.901856	0.242	0.424	5.4e-114	0.173731	0.515	0.473	1	-0.301083	0.515	0.376	1	-0.127351	0.376	0.473	1	0.350924
Ahnak2													0.501377	0.167	0.103	1.3e-11	-1.31706	0.167	0.062	3.37e-64	-0.815679	0.062	0.103	8.91e-11													0.259487	0.104	0.078	1	-1.06055	0.104	0.035	0.269259	-0.80106	0.035	0.078	1
Ahr																									-0.326111	0.171	0.178	1	-0.166101	0.171	0.105	2.25e-21	-0.492212	0.105	0.178	8.61e-30	-0.202975	0.086	0.088	1	-0.433745	0.086	0.042	1	-0.63672	0.042	0.088	1	-0.464575
Ahrr	0.40813	0.034	0.028	1	-0.528922	0.034	0.026	1	-0.120792	0.026	0.028	1
Ahsa1	-0.430043	0.026	0.032	1	0.252818	0.026	0.033	1	-0.177225	0.033	0.032	1	-0.240018	0.019	0.023	1	-0.156254	0.019	0.017	1	-0.396273	0.017	0.023	1	-0.0907607	0.017	0.017	1	0.312246	0.017	0.012	1	0.221485	0.012	0.017	1	-3.03496	0.009	0.065	1					-3.04535	0.007	0.065	0.0310438	-2.7102
Ahsa2	0.0445144	0.079	0.074	1	-0.0395595	0.079	0.081	1	0.00495493	0.081	0.074	1	0.0921268	0.085	0.062	1	0.0756089	0.085	0.074	1	0.167736	0.074	0.062	1	-0.0936253	0.059	0.045	1	0.262075	0.059	0.044	0.000264875	0.16845	0.044	0.045	1	0.099204	0.083	0.065	1	0.0432133	0.083	0.068	1	0.142417	0.068	0.065	1	1.51834
Ahsg																																					1.47176	0.25	0.143	1	-0.780733	0.25	0.15	1	0.691026	0.15	0.143	1
AI182371																																					-2.18206	0.003	0.014	1					0.0581055	0.007	0.014	1	0.694382
AI413582
AI429214
AI467606
AI593442
AI597479	0.0354474	0.051	0.056	1	-0.29542	0.051	0.049	1	-0.259973	0.049	0.056	1	0.059024	0.026	0.019	1	-0.604943	0.026	0.013	0.0506318	-0.545919	0.013	0.019	1	-0.456979	0.018	0.017	1	-0.237467	0.018	0.008	0.0150906	-0.694445	0.008	0.017	0.0176088	0.274682	0.024	0.017	1	-0.039598	0.024	0.019	1	0.235084	0.019	0.017	1	-1.91063
AI661453																																					-1.72455	0.021	0.031	1	-0.54001	0.021	0.01	1	-2.26456	0.01	0.031	1	0.244011
AI837181	1.46106	0.019	0.005	1	-2.34872	0.019	0.004	1.23e-06					0.247926	0.023	0.015	1	0.331157	0.023	0.025	1	0.579083	0.025	0.015	1	0.248363	0.017	0.015	1	0.208898	0.017	0.012	1	0.45726	0.012	0.015	1	-1.84933	0.021	0.024	1	0.460938	0.021	0.013	1	-1.38839	0.013	0.024	1	-0.97093
AI854703													1.98153	0.015	0.005	1	-1.30765	0.015	0.006	0.00814161
AI987944	0.46117	0.052	0.038	1	-0.282802	0.052	0.045	0.966931	0.178369	0.045	0.038	1	-0.110314	0.041	0.031	1	-0.0489693	0.041	0.029	1	-0.159283	0.029	0.031	1	0.104444	0.035	0.024	1	-0.138698	0.035	0.021	0.000102932	-0.0342538	0.021	0.024	1	0.127675	0.036	0.031	1	-0.289528	0.036	0.025	1	-0.161854	0.025	0.031	1	-0.277048
Aicda
Aida	0.280033	0.136	0.106	1	-0.0582489	0.136	0.142	1	0.221784	0.142	0.106	1	-0.00854971	0.14	0.118	1	-0.210454	0.14	0.106	3.75e-07	-0.219004	0.106	0.118	0.000935296	-0.0650455	0.135	0.116	1	-0.0420704	0.135	0.09	1.49e-13	-0.107116	0.09	0.116	4.03e-10	0.145317	0.119	0.078	1	0.178053	0.119	0.103	1	0.32337	0.103	0.078	1	0.159891
Aif1
Aif1l													1.33016	0.012	0.004	1	-1.51918	0.012	0.003	0.000552179																													-1.59229
Aifm1	-0.105309	0.208	0.206	1	0.0855866	0.208	0.227	1	-0.0197224	0.227	0.206	1	-0.260303	0.059	0.057	1	0.104413	0.059	0.051	0.320546	-0.15589	0.051	0.057	1	-0.172715	0.053	0.051	1	0.173288	0.053	0.038	0.0292261	0.00057268	0.038	0.051	1.6e-05	0.84065	0.077	0.058	1	-0.136753	0.077	0.061	1	0.703897	0.061	0.058	1	-0.646928
Aifm2	0.115932	0.14	0.119	1	-0.150218	0.14	0.138	1	-0.0342866	0.138	0.119	1	0.559636	0.019	0.006	1	0.187967	0.019	0.016	0.000816188	0.747603	0.016	0.006	1													-1.41009	0.015	0.014	1	1.79274	0.015	0.019	1	0.382656	0.019	0.014	1	-2.70373
Aifm3
Aig1	-0.412031	0.534	0.605	4.01e-65	0.368885	0.534	0.643	1.86e-73	-0.0431458	0.643	0.605	1	0.0818148	0.217	0.174	1	0.192555	0.217	0.204	1	0.27437	0.204	0.174	1	0.0862848	0.106	0.086	1	0.520413	0.106	0.098	0.739679	0.606698	0.098	0.086	1	-0.218763	0.354	0.381	1	0.572011	0.354	0.371	1	0.353249	0.371	0.381	1	-0.228344
Aim2													-0.0229775	0.046	0.041	1	0.113351	0.046	0.04	1	0.0903736	0.04	0.041	1	0.379444	0.012	0.01	1	0.397663	0.012	0.011	1	0.777107	0.011	0.01	1	-0.111966	0.009	0.014	1					-1.05504	0.006	0.014	1	0.755238
Aimp1	0.281727	0.085	0.071	1	-0.688147	0.085	0.057	0.0245988	-0.40642	0.057	0.071	0.00413143	0.217753	0.063	0.042	1	-0.387426	0.063	0.041	0.0854617	-0.169673	0.041	0.042	1	0.0633245	0.052	0.04	1	-0.407656	0.052	0.024	7.12e-11	-0.344332	0.024	0.04	7.08e-08	0.0436948	0.089	0.065	1	-1.67931	0.089	0.023	1	-1.63562	0.023	0.065	1	0.75837
Aimp2	0.419441	0.03	0.022	1	-1.31058	0.03	0.013	4.06e-09	-0.891135	0.013	0.022	2.86e-06	0.0618212	0.014	0.01	1	-0.449516	0.014	0.008	1	-0.387695	0.008	0.01	1	-0.512438	0.009	0.012	1					-0.296518	0.009	0.012	0.227545	-0.275352	0.027	0.014	1	-1.23827	0.027	0.006	1	-1.51362	0.006	0.014	1	-0.444739
Aip	-0.0155685	0.02	0.02	1	-1.07611	0.02	0.01	1	-1.09168	0.01	0.02	0.182627	0.206958	0.025	0.017	1	-0.429012	0.025	0.016	1	-0.222054	0.016	0.017	1	0.368914	0.03	0.025	1	-0.348148	0.03	0.015	0.000212557	0.0207657	0.015	0.025	0.977864	0.0322869	0.024	0.017	1	0.360882	0.024	0.016	1	0.393169	0.016	0.017	1	-0.0279318
Aipl1
Aire
Ajap1
Ajm1
Ajuba																																					0.895983	0.036	0.017	1	0.117065	0.036	0.022	1	1.01305	0.022	0.017	1
Ak1	0.224702	0.207	0.178	1	-1.21697	0.207	0.107	1.26e-30	-0.992271	0.107	0.178	1.6e-29													-1.03286	0.007	0.011	1					-0.721854	0.005	0.011	0.21368	0.228581	0.018	0.01	1	-3.37661	0.018	0.001	1	-3.14803	0.001	0.01	1	-5.50054
AK157302
Ak2	0.300844	0.154	0.113	1.74e-05	-0.956948	0.154	0.088	7.03e-59	-0.656104	0.088	0.113	1.76e-21	-0.288391	0.016	0.014	1	-0.431762	0.016	0.008	1.95e-08	-0.720153	0.008	0.014	8.07e-06	0.878149	0.027	0.017	1	-0.43913	0.027	0.012	1.36e-09	0.439019	0.012	0.017	1.85e-06	-0.183743	0.048	0.024	1	-0.494384	0.048	0.017	1	-0.678128	0.017	0.024	1	0.096936
Ak3	-0.00596217	0.213	0.209	1	-0.0832008	0.213	0.21	1	-0.089163	0.21	0.209	1	0.107471	0.098	0.076	1	0.178019	0.098	0.096	1	0.28549	0.096	0.076	1	-0.105463	0.054	0.051	1	-0.403435	0.054	0.023	1.51e-20	-0.508898	0.023	0.051	4.72e-23	1.47854	0.131	0.054	1	-0.740712	0.131	0.063	1	0.73783	0.063	0.054	1	0.42977
Ak4	-0.395631	0.041	0.048	1	-0.279963	0.041	0.032	0.158538	-0.675593	0.032	0.048	9.49e-10	0.124153	0.015	0.01	1	-0.573663	0.015	0.008	1	-0.449511	0.008	0.01	1													0.12912	0.009	0.017	1	0.285137	0.009	0.012	1	0.414257	0.012	0.017	1
Ak5																																					-0.622973	0.006	0.017	1					-0.645033	0.009	0.017	1
Ak6	-0.311414	0.048	0.055	1	-0.466301	0.048	0.038	7.73e-08	-0.777715	0.038	0.055	1.87e-12	-0.479488	0.041	0.044	1	-0.320035	0.041	0.025	0.000113436	-0.799522	0.025	0.044	0.000869212	-0.601606	0.02	0.023	1	-0.33446	0.02	0.012	0.000220324	-0.936066	0.012	0.023	8.15e-05	-0.359311	0.027	0.031	1	0.670905	0.027	0.028	1	0.311594	0.028	0.031	1	-0.406869
Ak7
Ak8
Ak9	0.440523	0.023	0.021	1	-0.57755	0.023	0.014	0.000151102	-0.137027	0.014	0.021	1
Akain1
Akap1	-0.377674	0.34	0.392	1.8e-42	-0.133745	0.34	0.344	1	-0.511419	0.344	0.392	1.89e-78	1.53204	0.026	0.006	1	-0.111222	0.026	0.024	5.19e-08	1.42082	0.024	0.006	1.58e-06	2.36156	0.035	0.004	1	0.226784	0.035	0.032	1.18e-13	2.58834	0.032	0.004	1.67e-09	5.32052	0.03	0	1	0.453506	0.03	0.036	1	5.77403	0.036	0	1	1.05064
Akap10	0.0264908	0.404	0.393	1	0.0655347	0.404	0.448	0.00288729	0.0920255	0.448	0.393	0.00974963	0.0537533	0.283	0.232	1	0.0954421	0.283	0.245	0.172283	0.149195	0.245	0.232	1	0.093563	0.248	0.211	1	0.233124	0.248	0.213	1	0.326687	0.213	0.211	1	-0.245358	0.292	0.313	1	0.471972	0.292	0.268	1	0.226614	0.268	0.313	1	0.194283
Akap11	-0.00922527	0.339	0.325	1	-0.180723	0.339	0.313	0.00216144	-0.189948	0.313	0.325	0.000253783	-0.104271	0.201	0.182	1	0.191981	0.201	0.18	1	0.0877101	0.18	0.182	1	-0.0563384	0.112	0.099	1	0.146203	0.112	0.078	1.51e-10	0.0898651	0.078	0.099	2.2e-08	0.186459	0.238	0.211	1	-0.0935788	0.238	0.178	1	0.0928799	0.178	0.211	1	-0.306241
Akap12													-0.0846552	0.485	0.442	1	-0.383017	0.485	0.364	5.66e-26	-0.467672	0.364	0.442	7.86e-19	0.00719737	0.147	0.128	1	2.31883	0.147	0.268	1.66e-71	2.32603	0.268	0.128	8.63e-90	-0.280287	0.08	0.065	1	0.21853	0.08	0.047	1	-0.0617575	0.047	0.065	1	-0.239164
Akap13	0.0545754	0.771	0.75	1	0.0539162	0.771	0.83	0.000103855	0.108492	0.83	0.75	1.43e-14	0.168632	0.759	0.669	6.42e-07	0.057432	0.759	0.745	1	0.226064	0.745	0.669	2.76e-08	0.0433203	0.485	0.418	0.164414	0.337468	0.485	0.455	1	0.380788	0.455	0.418	0.104884	0.0819161	0.589	0.605	1	0.462371	0.589	0.64	1	0.544287	0.64	0.605	1	0.216014
Akap14					0.677532	0.009	0.013	1	0.747587	0.013	0.008	1
Akap17b	-0.799724	0.048	0.079	4.79e-25	0.547387	0.048	0.07	0.00107548	-0.252337	0.07	0.079	3.02e-06	-0.0535162	0.032	0.022	1	-0.0225754	0.032	0.024	1	-0.0760916	0.024	0.022	1	1.51566	0.016	0.004	1	-0.650963	0.016	0.006	1.78e-06					0.859697	0.062	0.027	1	-0.113045	0.062	0.039	1	0.746652	0.039	0.027	1	0.955698
Akap3
Akap4
Akap5																									-0.00781771	0.075	0.066	1	-0.667011	0.075	0.029	3.63e-33	-0.674829	0.029	0.066	1.19e-20					1.0749	0.006	0.012	1	1.528	0.012	0.007	1	-0.0829282
Akap6	0.0384872	0.923	0.934	1	0.260074	0.923	0.97	6.79e-130	0.298562	0.97	0.934	8.56e-176													10.2534	0.041	0	1.19e-21	0.758356	0.041	0.037	1.51e-103	11.0118	0.037	0	2.19e-18													4.80343
Akap7	-0.0966819	0.229	0.231	1	-0.218932	0.229	0.207	0.0195749	-0.315614	0.207	0.231	4.06e-15	-0.292728	0.202	0.198	1	0.451212	0.202	0.22	1	0.158484	0.22	0.198	1	0.254274	0.17	0.128	1	0.112443	0.17	0.127	2.48e-06	0.366718	0.127	0.128	1	0.556217	0.188	0.16	1	0.427004	0.188	0.205	1	0.983221	0.205	0.16	1	0.436941
Akap8	0.266825	0.362	0.292	5.37e-08	-0.871152	0.362	0.25	7.8e-148	-0.604327	0.25	0.292	1.15e-81	0.333594	0.141	0.089	0.103378	-0.347298	0.141	0.099	1.37e-26	-0.0137031	0.099	0.089	1.05e-06	0.139228	0.137	0.101	1	-0.138542	0.137	0.084	2.52e-39	0.000685994	0.084	0.101	1.65e-18	0.26596	0.226	0.156	1	-0.745478	0.226	0.111	4.62e-05	-0.479518	0.111	0.156	1	-0.284636
Akap8l	0.229371	0.523	0.46	1.77e-15	-0.271393	0.523	0.506	9.52e-13	-0.0420218	0.506	0.46	1	0.0920654	0.183	0.143	0.0304	0.163888	0.183	0.177	0.000969081	0.255954	0.177	0.143	1	0.430316	0.107	0.068	0.0481268	0.274966	0.107	0.087	5.33e-19	0.705281	0.087	0.068	0.312268	0.213851	0.277	0.201	1	0.231878	0.277	0.229	1	0.445728	0.229	0.201	1	0.221879
Akap9	-0.0301476	0.655	0.661	1	-0.483587	0.655	0.607	7.67e-89	-0.513735	0.607	0.661	7.63e-120	-0.216892	0.383	0.359	1	-0.040065	0.383	0.326	7.21e-07	-0.256957	0.326	0.359	1.31e-07	0.0449669	0.259	0.215	1	-0.281896	0.259	0.165	6.23e-46	-0.236929	0.165	0.215	1.13e-25	0.386478	0.429	0.357	1	-0.334156	0.429	0.307	1	0.0523214	0.307	0.357	1	0.430222
Akip1													0.647943	0.014	0.007	1	-0.953441	0.014	0.006	1
Akirin1	0.752668	0.083	0.057	1	-0.748452	0.083	0.058	0.0012083	0.00421603	0.058	0.057	1	0.15691	0.064	0.045	1	-0.21861	0.064	0.049	1	-0.0616995	0.049	0.045	1	0.429808	0.068	0.049	1	0.0676903	0.068	0.046	0.0671779	0.497498	0.046	0.049	1	-0.276022	0.068	0.078	1	-0.92844	0.068	0.028	1	-1.20446	0.028	0.078	1	0.0815593
Akirin2	-0.0999239	0.161	0.162	1	0.157944	0.161	0.181	1	0.0580203	0.181	0.162	1	-0.0189266	0.075	0.06	1	-0.0259701	0.075	0.058	0.00898572	-0.0448966	0.058	0.06	1	-0.191452	0.071	0.068	1	-0.12592	0.071	0.04	3.45e-11	-0.317372	0.04	0.068	1.1e-16	-0.00802427	0.098	0.071	1	0.00980794	0.098	0.068	1	0.00178368	0.068	0.071	1	1.0925
Akna													0.184491	0.046	0.033	1	-0.535224	0.046	0.025	7.28e-06	-0.350733	0.025	0.033	1	0.283566	0.028	0.025	1	-0.29769	0.028	0.015	0.00162725	-0.014124	0.015	0.025	0.0784416	2.66308	0.045	0.007	1	-1.04192	0.045	0.019	1	1.62116	0.019	0.007	1	0.497238
Aknad1
Akp3
Akr1a1	0.125759	0.096	0.076	0.957798	-1.25105	0.096	0.047	2.23e-27	-1.1253	0.047	0.076	5.75e-09	-0.370927	0.131	0.141	1	-0.394284	0.131	0.089	2.84e-07	-0.765211	0.089	0.141	2.28e-12	-0.0342735	0.121	0.104	1	-0.424991	0.121	0.065	9.51e-25	-0.459264	0.065	0.104	1.03e-12	-0.525662	0.143	0.201	1	0.0751432	0.143	0.102	1	-0.450519	0.102	0.201	1	-0.63565
Akr1b10	-0.079081	0.112	0.114	1	-0.254082	0.112	0.106	0.011597	-0.333163	0.106	0.114	1.39e-09	0.121646	0.019	0.014	1	0.284698	0.019	0.02	1	0.406343	0.02	0.014	1													-0.743715	0.03	0.031	1	-0.254212	0.03	0.015	1	-0.997927	0.015	0.031	1	5.2286
Akr1b3	-0.313565	0.13	0.156	1.78e-14	-0.706824	0.13	0.086	0.0229945	-1.02039	0.086	0.156	3.03e-45	0.0512057	0.05	0.036	1	-0.725059	0.05	0.024	0.00546602	-0.673854	0.024	0.036	0.0160947	-0.420381	0.025	0.028	1	-0.349865	0.025	0.011	1	-0.770246	0.011	0.028	1.67e-06	1.61772	0.054	0.024	1	-1.95288	0.054	0.016	1	-0.335152	0.016	0.024	1	-1.19913
Akr1b7
Akr1b8													0.0604458	0.023	0.018	1	-0.125489	0.023	0.016	1	-0.0650433	0.016	0.018	1
Akr1c12
Akr1c13
Akr1c14																									0.102712	0.059	0.047	1	0.139879	0.059	0.035	1.54e-05	0.242591	0.035	0.047	1	2.2916	0.024	0.007	1	0.182296	0.024	0.019	1	2.47389	0.019	0.007	1	-0.434153
Akr1c18
Akr1c19													0.153958	0.025	0.017	1	0.433074	0.025	0.026	1	0.587032	0.026	0.017	1	-0.0262818	0.063	0.047	1	0.169964	0.063	0.039	0.000203763	0.143682	0.039	0.047	1	-0.633421	0.036	0.044	1	1.40807	0.036	0.044	1	0.774645	0.044	0.044	1	-0.607105
Akr1c20
Akr1c21
Akr1c6
Akr1cl
Akr1d1
Akr1e1	-0.151857	0.065	0.068	1	-0.419871	0.065	0.054	0.445978	-0.571728	0.054	0.068	4.86e-05	-0.171513	0.034	0.032	1	0.30973	0.034	0.032	1	0.138217	0.032	0.032	1	0.166165	0.026	0.019	1	-0.00399545	0.026	0.015	1.97e-05	0.16217	0.015	0.019	1	-0.58733	0.039	0.044	1	0.0205551	0.039	0.033	1	-0.566775	0.033	0.044	1	-2.58542
Akr7a5	-0.632857	0.014	0.018	1	-0.302405	0.014	0.01	1	-0.935262	0.01	0.018	0.000494536	-0.48234	0.009	0.01	1					-0.776176	0.005	0.01	1	-1.23396	0.006	0.013	1					-0.373444	0.008	0.013	1	0.209874	0.021	0.017	1	-0.367633	0.021	0.007	1	-0.157759	0.007	0.017	1	-0.860518
Akt1	0.283509	0.106	0.085	1	-1.13498	0.106	0.049	1.86e-33	-0.851476	0.049	0.085	2.04e-31	0.394335	0.038	0.022	1	-0.416836	0.038	0.022	0.00295736	-0.022501	0.022	0.022	1	-0.203847	0.068	0.067	1	-0.0894837	0.068	0.04	1.31e-10	-0.29333	0.04	0.067	3.46e-15	-1.69066	0.036	0.051	1	0.587067	0.036	0.033	1	-1.10359	0.033	0.051	1	0.501353
Akt1s1	1.07884	0.047	0.023	1	-1.4678	0.047	0.019	1.28e-15	-0.38896	0.019	0.023	0.000286823	0.968538	0.016	0.009	1	-0.166208	0.016	0.013	1	0.80233	0.013	0.009	1	0.707887	0.024	0.014	1	-0.332858	0.024	0.011	0.000265015	0.375029	0.011	0.014	0.795435	0.0283369	0.021	0.02	1	0.533353	0.021	0.016	1	0.56169	0.016	0.02	1	-0.0501045
Akt2	-0.0898853	0.194	0.194	0.151306	-0.735244	0.194	0.129	2.28e-36	-0.825129	0.129	0.194	1.5e-73	-0.095531	0.113	0.095	1	-0.588257	0.113	0.064	1.54e-14	-0.683788	0.064	0.095	4.12e-11	-0.0556335	0.052	0.05	1	0.0410767	0.052	0.037	0.000120901	-0.0145568	0.037	0.05	1.11e-08	0.172333	0.098	0.105	1	-0.645871	0.098	0.054	1	-0.473538	0.054	0.105	0.371726	-0.711692
Akt3													0.0395909	0.705	0.62	1	0.416869	0.705	0.736	8.36e-28	0.45646	0.736	0.62	1e-43	-0.115896	0.583	0.546	1	0.650239	0.583	0.622	2.09e-49	0.534343	0.622	0.546	9.08e-46	-0.0432556	0.646	0.602	1	0.770081	0.646	0.718	2.74e-05	0.726825	0.718	0.602	6.05e-05	-0.0991663
Aktip	0.150609	0.064	0.057	1	-0.0406122	0.064	0.061	1	0.109996	0.061	0.057	1	0.323425	0.072	0.049	1	-0.163712	0.072	0.05	0.364111	0.159713	0.05	0.049	1	0.443127	0.05	0.033	1	-0.136548	0.05	0.026	5.64e-10	0.306578	0.026	0.033	1	-1.03562	0.045	0.061	1	1.04751	0.045	0.048	1	0.011893	0.048	0.061	1	0.357109
AL607142.1
AL731706.1
AL731706.2
AL845275.1
Alad	0.212139	0.032	0.024	1	-0.682632	0.032	0.021	1	-0.470492	0.021	0.024	1	-0.202753	0.01	0.008	1	0.0294218	0.01	0.006	1					-0.77125	0.013	0.019	1	0.68935	0.013	0.014	1	-0.0819008	0.014	0.019	1	-0.325572	0.027	0.024	1	-0.911902	0.027	0.012	1	-1.23747	0.012	0.024	1	-0.423983
Alas1	0.358583	0.229	0.177	7.12e-05	-0.293222	0.229	0.205	0.0026663	0.0653613	0.205	0.177	1	0.560428	0.065	0.039	1	-0.696955	0.065	0.034	2.3e-13	-0.136527	0.034	0.039	0.0272236	-0.219826	0.029	0.024	1	-0.224766	0.029	0.014	3.55e-12	-0.444591	0.014	0.024	7.29e-15	-0.854421	0.051	0.061	1	-0.522728	0.051	0.019	1	-1.37715	0.019	0.061	0.390403	-0.263048
Alas2	-0.0713036	0.048	0.049	1	2.19672	0.048	0.188	1.53e-219	2.12542	0.188	0.049	2.1e-244					4.17088	0.001	0.011	1	0.948431	0.011	0.006	1													0.144773	0.018	0.014	1	0.159432	0.018	0.017	1	0.304205	0.017	0.014	1
Alb
Albfm1
Alcam													-0.130993	0.033	0.028	1	0.391472	0.033	0.032	1	0.260479	0.032	0.028	1													-1.83821	0.018	0.037	1	0.710891	0.018	0.017	1	-1.12731	0.017	0.037	1
Aldh16a1	0.5524	0.041	0.031	0.00120876	-0.916956	0.041	0.026	1.32e-06	-0.364557	0.026	0.031	1	-0.0675301	0.037	0.03	1	-0.0420837	0.037	0.03	1	-0.109614	0.03	0.03	1	-0.229817	0.016	0.015	1	-0.105794	0.016	0.01	1	-0.335611	0.01	0.015	1	-0.910096	0.033	0.02	1	0.212882	0.033	0.013	1	-0.697214	0.013	0.02	1	-0.813696
Aldh18a1					-0.163421	0.008	0.011	1	0.366036	0.011	0.008	1	-0.23921	0.085	0.075	1	-0.297626	0.085	0.058	0.000314181	-0.536836	0.058	0.075	1													0.144776	0.021	0.017	1	-0.542424	0.021	0.013	1	-0.397648	0.013	0.017	1
Aldh1a1													0.0987743	0.621	0.522	3.7e-05	0.3851	0.621	0.617	0.000740488	0.483874	0.617	0.522	3.76e-27													-0.0631746	0.021	0.01	1	-5.51109	0.021	0	1	-5.57426	0	0.01	1
Aldh1a2													-0.809781	0.144	0.181	0.00209644	-0.322258	0.144	0.104	0.000101765	-1.13204	0.104	0.181	2.62e-29
Aldh1a3																																					3.50505	0.015	0	1	-4.72954	0.015	0	1
Aldh1a7
Aldh1b1
Aldh1l1	0.414385	0.042	0.03	0.345709	-0.0765212	0.042	0.04	1	0.337864	0.04	0.03	1	-0.802585	0.009	0.012	1	0.597494	0.009	0.011	1	-0.205091	0.011	0.012	1	0.3026	0.026	0.021	1	0.0232307	0.026	0.019	1	0.325831	0.019	0.021	1													2.47244
Aldh1l2	-0.757236	0.028	0.04	4.38e-09	-0.174342	0.028	0.023	1	-0.931578	0.023	0.04	1.63e-22	-0.207136	0.013	0.012	1	-1.12211	0.013	0.005	1	-1.32924	0.005	0.012	0.0179044
Aldh2	0.975283	0.116	0.058	4.34e-14	-1.65972	0.116	0.04	9.61e-32	-0.684438	0.04	0.058	1	0.351091	0.267	0.181	2.35e-09	-0.629128	0.267	0.156	4.56e-37	-0.278036	0.156	0.181	0.0288613	0.102594	0.104	0.089	1	-0.346078	0.104	0.058	5.54e-16	-0.243485	0.058	0.089	2.53e-08	0.196273	0.274	0.224	1	0.227845	0.274	0.24	1	0.424118	0.24	0.224	1	0.196795
Aldh3a1																																					2.28629	0.024	0.007	1	-2.86952	0.024	0.003	1
Aldh3a2	0.27806	0.031	0.029	1	-0.57899	0.031	0.025	4.83e-08	-0.30093	0.025	0.029	0.269656	-0.0276932	0.077	0.062	1	-0.438955	0.077	0.047	2.2e-11	-0.466648	0.047	0.062	0.141573	0.0734761	0.096	0.08	1	-0.296852	0.096	0.053	1.64e-20	-0.223376	0.053	0.08	8.08e-09	-0.149007	0.086	0.085	1	0.149744	0.086	0.061	1	0.000736124	0.061	0.085	1	0.556489
Aldh3b1													0.907852	0.013	0.005	1	-0.0906204	0.013	0.009	1																	-1.20508	0.006	0.01	1					-1.98385	0.001	0.01	1
Aldh3b2
Aldh3b3
Aldh4a1	0.516478	0.091	0.051	3.88e-19	0.0399243	0.091	0.125	5.14e-31	0.556402	0.125	0.051	6.02e-113	0.294016	0.017	0.009	1	-0.700176	0.017	0.01	1	-0.40616	0.01	0.009	1	0.965414	0.015	0.005	1	-0.792815	0.015	0.008	1					-0.0715956	0.018	0.014	1	-1.11568	0.018	0.01	1	-1.18728	0.01	0.014	1	2.62537
Aldh5a1	-0.474308	0.118	0.151	4.46e-12	-0.437387	0.118	0.09	1.9e-12	-0.911695	0.09	0.151	1.12e-62	0.00579418	0.016	0.012	1	1.05114	0.016	0.021	1	1.05693	0.021	0.012	1	-0.614148	0.014	0.016	1	0.0056323	0.014	0.007	0.123582	-0.608516	0.007	0.016	2.09e-05	0.544233	0.021	0.01	1	0.911191	0.021	0.013	1	1.45542	0.013	0.01	1
Aldh6a1	0.222713	0.363	0.32	6.43e-05	0.165201	0.363	0.42	5.2e-10	0.387914	0.42	0.32	7.62e-41	-0.635271	0.021	0.022	1	1.65392	0.021	0.042	1	1.01865	0.042	0.022	1													0.574646	0.033	0.031	1	0.485697	0.033	0.029	1	1.06034	0.029	0.031	1	0.0355796
Aldh7a1	-0.249533	0.096	0.111	1	-0.0194103	0.096	0.103	1	-0.268943	0.103	0.111	1	-0.128223	0.096	0.088	1	0.098012	0.096	0.091	1	-0.0302107	0.091	0.088	1	0.112154	0.028	0.023	1	0.155556	0.028	0.019	0.0237796	0.267709	0.019	0.023	1	-1.38553	0.045	0.092	1	1.19669	0.045	0.058	1	-0.188848	0.058	0.092	1	1.23477
Aldh8a1
Aldh9a1	0.139996	0.421	0.366	6.88e-05	-0.353954	0.421	0.397	1.02e-16	-0.213958	0.397	0.366	1
Aldoa	1.83972	0.082	0.008	9.66e-19	-11.6499	0.082	0	1.72e-93					-0.111736	0.082	0.081	1	-2.50845	0.082	0.013	1.77e-08	-2.62018	0.013	0.081	1.66e-21	-0.470929	0.154	0.187	4.96e-14	-0.158722	0.154	0.086	0.302014	-0.62965	0.086	0.187	4.68e-50	0.00791061	0.107	0.088	1	-0.898321	0.107	0.041	1	-0.89041	0.041	0.088	1	0.180933
Aldoa	1.83972	0.082	0.008	9.66e-19	-11.6499	0.082	0	1.72e-93					-0.111736	0.082	0.081	1	-2.50845	0.082	0.013	1.77e-08	-2.62018	0.013	0.081	1.66e-21	-0.470929	0.154	0.187	4.96e-14	-0.158722	0.154	0.086	0.302014	-0.62965	0.086	0.187	4.68e-50	0.00791061	0.107	0.088	1	-0.898321	0.107	0.041	1	-0.89041	0.041	0.088	1	0.180933
Aldoart1
Aldoart2
Aldob
Aldoc
Alg1	0.161477	0.037	0.026	1	-0.739975	0.037	0.023	2.6e-08	-0.578499	0.023	0.026	4.99e-06	-0.207304	0.022	0.022	1	-0.0485658	0.022	0.019	1	-0.255869	0.019	0.022	1	0.560886	0.018	0.012	1	0.0956363	0.018	0.014	1	0.656522	0.014	0.012	1	-0.175163	0.027	0.014	1	-0.368655	0.027	0.013	1	-0.543817	0.013	0.014	1	5.19196
Alg10b	0.123142	0.022	0.022	1	-0.144479	0.022	0.02	1	-0.0213372	0.02	0.022	1	0.210888	0.012	0.01	1	-0.615385	0.012	0.006	1	-0.404497	0.006	0.01	1	0.00575273	0.02	0.02	1	0.0536395	0.02	0.011	1	0.0593922	0.011	0.02	1	0.382835	0.024	0.014	1	-0.000545402	0.024	0.012	1	0.382289	0.012	0.014	1	1.15373
Alg11	0.029277	0.04	0.036	1	-0.580797	0.04	0.029	0.080981	-0.55152	0.029	0.036	1	-0.0657801	0.019	0.018	1	0.552522	0.019	0.022	1	0.486741	0.022	0.018	1	-0.156146	0.027	0.027	1	-0.460949	0.027	0.012	2.59e-06	-0.617095	0.012	0.027	5.01e-06	-0.593497	0.018	0.034	1	0.161784	0.018	0.015	1	-0.431713	0.015	0.034	1	0.584877
Alg12	0.00351673	0.059	0.056	1	-0.432701	0.059	0.047	3.3e-05	-0.429185	0.047	0.056	4.37e-15	0.266606	0.026	0.014	1	-0.248998	0.026	0.016	0.0498346	0.017608	0.016	0.014	1	0.408833	0.021	0.014	1	-0.223386	0.021	0.012	0.000933941	0.185447	0.012	0.014	1	0.746685	0.045	0.024	1	-0.794729	0.045	0.023	1	-0.0480441	0.023	0.024	1	0.962483
Alg13	0.157158	0.081	0.072	1	-0.000807382	0.081	0.09	1	0.15635	0.09	0.072	1	0.108592	0.089	0.075	1	0.24818	0.089	0.093	1	0.356772	0.093	0.075	1	0.317904	0.043	0.034	1	0.357511	0.043	0.042	1	0.675414	0.042	0.034	1	-1.65174	0.03	0.061	1	1.4614	0.03	0.049	1	-0.190341	0.049	0.061	1	0.147694
Alg14	-0.259571	0.045	0.06	1	0.0370445	0.045	0.054	1	-0.222527	0.054	0.06	1	-0.0185466	0.084	0.073	1	-0.138719	0.084	0.065	0.823781	-0.157265	0.065	0.073	1	-0.132092	0.11	0.103	1	0.029749	0.11	0.076	6.28e-07	-0.102343	0.076	0.103	0.00271514	-0.0370222	0.14	0.136	1	0.0928069	0.14	0.102	1	0.0557847	0.102	0.136	1	0.0281599
Alg2	0.060843	0.127	0.115	1	0.110485	0.127	0.138	1	0.171328	0.138	0.115	1	0.682547	0.044	0.024	1	-0.260297	0.044	0.033	1	0.422251	0.033	0.024	1	0.916522	0.012	0.007	1	-0.687225	0.012	0.004	8.09e-05					2.41863	0.021	0.003	1	-1.38948	0.021	0.006	1					-0.262392
Alg3	1.11653	0.01	0.005	1	-1.56017	0.01	0.004	1																	0.836686	0.01	0.005	1	-0.440766	0.01	0.006	1																	-0.166713
Alg5	0.280739	0.032	0.025	1	-0.777431	0.032	0.021	1.52e-05	-0.496692	0.021	0.025	0.0225889	-0.336488	0.036	0.037	1	-0.24754	0.036	0.025	0.0741504	-0.584027	0.025	0.037	0.0919081	0.35825	0.026	0.02	1	-0.248575	0.026	0.014	0.000246173	0.109675	0.014	0.02	0.034211	-0.16358	0.018	0.017	1	0.515011	0.018	0.017	1	0.351431	0.017	0.017	1	-0.426073
Alg6	-0.325565	0.119	0.135	4.8e-07	0.589847	0.119	0.178	1.27e-31	0.264282	0.178	0.135	0.000425828	0.0301897	0.075	0.062	1	0.431409	0.075	0.08	1	0.461598	0.08	0.062	1	0.454814	0.05	0.032	1	-0.205045	0.05	0.029	4.88e-05	0.249769	0.029	0.032	1	0.365322	0.083	0.065	1	0.293617	0.083	0.079	1	0.658939	0.079	0.065	1	1.37679
Alg8	0.160932	0.028	0.027	1	-0.58408	0.028	0.022	0.00690081	-0.423147	0.022	0.027	0.0333774	-0.139821	0.029	0.026	1	-0.663486	0.029	0.016	0.000301941	-0.803308	0.016	0.026	0.206944	-0.134805	0.021	0.015	1	-0.492669	0.021	0.009	0.000322889	-0.627474	0.009	0.015	1	0.497436	0.039	0.02	1	-0.888775	0.039	0.015	1	-0.391338	0.015	0.02	1	1.98455
Alg9	0.0163932	0.075	0.077	1	0.0677662	0.075	0.084	1	0.0841595	0.084	0.077	1	-0.184721	0.074	0.071	1	0.0158676	0.074	0.065	1	-0.168854	0.065	0.071	1	-0.160777	0.048	0.045	1	0.24927	0.048	0.038	1	0.0884931	0.038	0.045	1	-0.576584	0.071	0.095	1	-0.096931	0.071	0.06	1	-0.673515	0.06	0.095	1	-0.177812
Alk																																					-0.513466	0.018	0.017	1	-0.524298	0.018	0.007	1	-1.03776	0.007	0.017	1
Alkal1
Alkal2													-0.783384	0.009	0.012	1	1.70384	0.009	0.026	0.000312127	0.920454	0.026	0.012	1
Alkbh1	0.00710906	0.146	0.136	1	-0.16333	0.146	0.141	0.00107482	-0.156221	0.141	0.136	0.0553267	-0.0874643	0.121	0.108	1	-0.288013	0.121	0.084	5.44e-11	-0.375477	0.084	0.108	2.21e-05	-0.189611	0.059	0.056	1	-0.102863	0.059	0.039	2.75e-07	-0.292474	0.039	0.056	1.4e-09	0.846661	0.137	0.078	1	-1.14409	0.137	0.058	0.53729	-0.297425	0.058	0.078	1	-0.707409
Alkbh2	0.952154	0.017	0.01	1	-2.38243	0.017	0.005	4.8e-18	-1.43028	0.005	0.01	1.86e-10	-0.292611	0.017	0.016	1	-1.29917	0.017	0.005	1.69e-06	-1.59178	0.005	0.016	0.000140516	-0.0273826	0.013	0.012	1	-0.487427	0.013	0.008	1	-0.514809	0.008	0.012	1	-0.19691	0.021	0.02	1	-1.82477	0.021	0.004	1	-2.02168	0.004	0.02	1	0.24086
Alkbh3	0.0186996	0.237	0.219	1	-0.108797	0.237	0.263	1	-0.0900979	0.263	0.219	1	0.385781	0.076	0.046	0.341032	0.02554	0.076	0.068	1	0.411321	0.068	0.046	1	0.311613	0.051	0.027	1	0.157464	0.051	0.043	1	0.469077	0.043	0.027	1	-0.22545	0.071	0.078	1	-0.255624	0.071	0.067	1	-0.481075	0.067	0.078	1	0.671364
Alkbh4	0.279098	0.015	0.011	1	-1.19185	0.015	0.006	3.13e-05	-0.912751	0.006	0.011	2.36e-07																									1.08923	0.021	0.01	1	-0.247134	0.021	0.01	1	0.8421	0.01	0.01	1
Alkbh5	0.164522	0.083	0.082	1	-0.545895	0.083	0.062	1.32e-07	-0.381373	0.062	0.082	3.21e-07	-0.126654	0.099	0.088	1	-0.430595	0.099	0.064	3.86e-10	-0.557248	0.064	0.088	0.00115843	-0.0705712	0.079	0.068	1	-0.475494	0.079	0.037	4.76e-23	-0.546065	0.037	0.068	2.05e-12	-0.238511	0.092	0.109	1	-1.0266	0.092	0.052	1	-1.26511	0.052	0.109	1	0.278926
Alkbh6	0.334245	0.019	0.011	1	-0.922796	0.019	0.011	1	-0.588551	0.011	0.011	1	-0.141683	0.012	0.013	1	-0.410849	0.012	0.007	1	-0.552532	0.007	0.013	1	0.519835	0.012	0.008	1	0.0670412	0.012	0.009	1					1.0358	0.03	0.007	1	-1.73365	0.03	0.009	1					0.969765
Alkbh7	-0.162015	0.031	0.03	1	-1.58723	0.031	0.012	0.00211511	-1.74925	0.012	0.03	3.97e-10
Alkbh8	-0.126896	0.179	0.183	1	0.0623819	0.179	0.192	1	-0.0645141	0.192	0.183	1	0.0501131	0.076	0.062	1	0.147474	0.076	0.073	1	0.197587	0.073	0.062	1	0.179843	0.091	0.067	1	-0.0846014	0.091	0.057	6.2e-10	0.0952419	0.057	0.067	1	0.189186	0.14	0.105	1	0.0763519	0.14	0.112	1	0.265538	0.112	0.105	1	0.386436
Allc																																					-2.09639	0.009	0.031	1	0.74145	0.009	0.013	1	-1.35494	0.013	0.031	1
Alms1	0.0538474	0.082	0.08	1	-0.0680987	0.082	0.08	1	-0.0142513	0.08	0.08	1	0.0230014	0.135	0.117	1	0.0498789	0.135	0.115	1	0.0728803	0.115	0.117	1	0.0139586	0.062	0.049	1	0.171462	0.062	0.045	0.0176473	0.185421	0.045	0.049	1	-0.201636	0.122	0.116	1	0.58455	0.122	0.108	1	0.382914	0.108	0.116	1	0.1715
Alox12																									0.217858	0.041	0.033	1	-1.43164	0.041	0.011	2.29e-29	-1.21379	0.011	0.033	3.05e-15	0.0254853	0.009	0.01	1					-0.69444	0.003	0.01	1	-0.0461812
Alox12b
Alox12e
Alox15
Alox5	-1.69155	0.014	0.044	1.46e-21	1.83484	0.014	0.051	2.13e-17	0.143297	0.051	0.044	1																									-3.66411	0	0.01	1					-1.58989	0.001	0.01	1
Alox5ap																																					-1.21387	0.003	0.01	1					-1.10888	0.001	0.01	1
Alox8
Aloxe3
Alpi
Alpk1													-0.0649538	0.185	0.148	1	0.447695	0.185	0.198	1	0.382741	0.198	0.148	0.0150727	0.563146	0.167	0.108	5.39e-09	-0.228063	0.167	0.098	1.66e-26	0.335083	0.098	0.108	1	0.297351	0.226	0.19	1	-0.312225	0.226	0.147	1	-0.0148746	0.147	0.19	1	0.451871
Alpk2	-0.640094	0.625	0.732	1.85e-192	-0.0135091	0.625	0.664	1	-0.653603	0.664	0.732	9.93e-207
Alpk3	0.0624123	0.725	0.705	1	-0.221714	0.725	0.753	1.11e-13	-0.159302	0.753	0.705	0.00935265
Alpl	-0.0645121	0.12	0.117	1	0.148027	0.12	0.148	0.0157288	0.0835146	0.148	0.117	0.68271	0.670488	0.014	0.007	1	0.467144	0.014	0.013	1	1.13763	0.013	0.007	1	0.248302	0.057	0.042	1	-0.0259061	0.057	0.033	1.27e-08	0.222396	0.033	0.042	1													-0.176972
Alppl2
Als2	0.194901	0.091	0.079	0.0661972	-0.228515	0.091	0.081	7.1e-10	-0.0336145	0.081	0.079	1	-0.365445	0.089	0.089	1	-0.147522	0.089	0.064	0.000106515	-0.512967	0.064	0.089	0.00049068	0.129951	0.074	0.059	1	-0.268288	0.074	0.041	9.86e-21	-0.138336	0.041	0.059	7.28e-05	-0.268561	0.077	0.102	1	-0.234077	0.077	0.048	1	-0.502639	0.048	0.102	1	0.482542
Als2cl	0.589714	0.026	0.012	1	-0.92635	0.026	0.016	1.65e-12	-0.336636	0.016	0.012	0.000146086													0.0786369	0.2	0.161	0.430314	-0.233944	0.2	0.122	4.4e-29	-0.155307	0.122	0.161	7.57e-07	0.396444	0.104	0.085	1	-0.424066	0.104	0.058	1	-0.0276215	0.058	0.085	1	-0.358491
Alx1
Alx3
Alx4
Alyref																									0.661908	0.024	0.014	1	-0.360523	0.024	0.011	0.0134374	0.301385	0.011	0.014	1	0.43333	0.018	0.014	1	-2.30123	0.018	0.001	1	-1.8679	0.001	0.014	1	1.06985
Alyref2	-0.236495	0.01	0.009	1	-0.893813	0.01	0.005	1																													3.43081	0.012	0	1	-0.817953	0.012	0.004	1
Amacr	-0.395322	0.043	0.056	1	-0.0407273	0.043	0.046	1	-0.43605	0.046	0.056	1																									0.944712	0.012	0.003	1	0.00977406	0.012	0.006	1					4.87864
Ambn
Ambp
Ambra1	-0.0786774	0.529	0.532	0.0429208	0.175165	0.529	0.607	4.33e-29	0.0964879	0.607	0.532	2.15e-07	-0.0802498	0.506	0.457	1	0.316402	0.506	0.527	0.0108937	0.236152	0.527	0.457	0.00445756	0.0348571	0.376	0.314	1	0.511967	0.376	0.367	1	0.546824	0.367	0.314	6.1e-06	-0.175408	0.5	0.497	1	0.630356	0.5	0.54	1	0.454949	0.54	0.497	1	0.131234
Amd1	0.998999	0.457	0.286	6.49e-208	-1.03644	0.457	0.305	1.32e-242	-0.037438	0.305	0.286	1	-0.811505	0.014	0.019	1	1.19613	0.014	0.025	8.24e-13	0.384625	0.025	0.019	1	-1.19985	0.015	0.021	1	0.306572	0.015	0.01	6.26e-24	-0.893279	0.01	0.021	2.47e-17	-0.863356	0.039	0.054	1	0.536616	0.039	0.026	1	-0.32674	0.026	0.054	1	0.17177
Amd2	0.766446	0.015	0.011	1	-2.57312	0.015	0.003	7.93e-32	-1.80668	0.003	0.011	9.47e-16																																					-0.502332
Amdhd1
Amdhd2	0.401605	0.038	0.028	1	-1.04943	0.038	0.021	1.39e-16	-0.647828	0.021	0.028	5.27e-07	0.270149	0.023	0.013	1	-0.489736	0.023	0.012	0.000441376	-0.219587	0.012	0.013	1	-0.0542665	0.023	0.017	1	-0.0829484	0.023	0.014	3.56e-06	-0.137215	0.014	0.017	1	1.15041	0.051	0.02	1	-1.9941	0.051	0.006	0.328072	-0.843692	0.006	0.02	1	-1.66003
Amelx													0.0408079	0.019	0.016	1	0.853875	0.019	0.03	1	0.894683	0.03	0.016	1
Amer1	0.452074	0.065	0.047	1.61e-06	-0.639174	0.065	0.041	6.02e-18	-0.1871	0.041	0.047	1	0.392869	0.04	0.023	0.185615	-0.238488	0.04	0.025	0.00919682	0.154381	0.025	0.023	1	0.862827	0.026	0.014	1	-0.597746	0.026	0.011	7.28e-12	0.26508	0.011	0.014	1	-0.0367551	0.03	0.034	1	-0.49588	0.03	0.015	1	-0.532635	0.015	0.034	1	1.10587
Amer2
Amer3
Amfr	0.0399299	0.177	0.167	1	-0.24307	0.177	0.158	1	-0.20314	0.158	0.167	0.245986	0.156332	0.145	0.109	1	-0.11928	0.145	0.112	8.2e-05	0.0370517	0.112	0.109	1	-0.0707792	0.092	0.083	1	0.198874	0.092	0.07	0.00139564	0.128095	0.07	0.083	0.00673335	-0.337443	0.128	0.133	1	-0.204115	0.128	0.08	1	-0.541558	0.08	0.133	1	0.00562486
Amh
Amhr2
Amigo1	0.252399	0.022	0.015	1	-1.63099	0.022	0.006	1.72e-07	-1.37859	0.006	0.015	0.000495307	0.197833	0.024	0.017	1	-0.187601	0.024	0.017	1	0.0102322	0.017	0.017	1													-1.41479	0.015	0.041	1	1.03401	0.015	0.023	1	-0.380779	0.023	0.041	1	0.717448
Amigo2																									-0.562868	0.009	0.01	1					-0.907186	0.005	0.01	1	-0.634677	0.107	0.15	1	0.609425	0.107	0.118	1	-0.0252517	0.118	0.15	1	-0.68227
Amigo3
Ammecr1	-0.0280516	0.321	0.317	1	0.621199	0.321	0.442	5.78e-88	0.593148	0.442	0.317	2.69e-75	0.296324	0.139	0.097	0.00268742	0.286693	0.139	0.14	1	0.583017	0.14	0.097	1	0.250496	0.072	0.054	1	0.671487	0.072	0.075	1	0.921983	0.075	0.054	1	-0.32268	0.08	0.068	1	1.20817	0.08	0.108	1	0.885493	0.108	0.068	1	-0.0936462
Ammecr1l	0.194879	0.32	0.281	1.86e-07	-0.327128	0.32	0.295	6.85e-15	-0.132249	0.295	0.281	1	0.0250595	0.152	0.119	0.0538317	-0.296375	0.152	0.105	7.9e-19	-0.271315	0.105	0.119	0.305183	0.044059	0.11	0.088	1	0.0712628	0.11	0.078	7.73e-14	0.115322	0.078	0.088	0.277722	0.644932	0.146	0.102	1	-0.331095	0.146	0.098	1	0.313837	0.098	0.102	1	-0.462527
Amn
Amn1	0.379125	0.206	0.153	5.61e-11	0.294644	0.206	0.258	5.63e-16	0.673769	0.258	0.153	2.43e-66	-0.133836	0.176	0.15	1	0.488475	0.176	0.195	1	0.354639	0.195	0.15	1	-0.267608	0.087	0.082	1	0.361725	0.087	0.079	1	0.094117	0.079	0.082	1	0.624567	0.143	0.109	1	0.777141	0.143	0.188	1	1.40171	0.188	0.109	1	0.292731
Amot	-0.153025	0.039	0.041	1	0.908888	0.039	0.064	4.23e-17	0.755863	0.064	0.041	1.59e-05	0.12011	0.023	0.017	1	0.150545	0.023	0.021	1	0.270655	0.021	0.017	1	0.232703	0.024	0.021	1	0.123673	0.024	0.016	1	0.356376	0.016	0.021	1	-0.217791	0.071	0.078	1	0.0783764	0.071	0.057	1	-0.139415	0.057	0.078	1	1.51881
Amotl1	-0.490757	0.048	0.064	5.57e-07	-0.487412	0.048	0.042	1	-0.978168	0.042	0.064	4.55e-14	0.0396919	0.2	0.157	1	-0.362396	0.2	0.136	2.16e-12	-0.322705	0.136	0.157	0.198031	0.00335125	0.263	0.24	1	-0.0348554	0.263	0.194	1.31e-09	-0.0315041	0.194	0.24	2.89e-05	0.147023	0.369	0.33	1	-0.147836	0.369	0.265	1	-0.000812686	0.265	0.33	1	-0.597177
Amotl2	0.266333	0.161	0.139	1	-1.17019	0.161	0.074	4.22e-84	-0.903854	0.074	0.139	3.85e-58	0.571302	0.072	0.04	0.189893	-0.697814	0.072	0.037	1e-13	-0.126512	0.037	0.04	1	0.00537357	0.099	0.093	1	0.078725	0.099	0.069	2.17e-11	0.0840986	0.069	0.093	2.41e-08	-0.0904816	0.176	0.146	1	0.00517474	0.176	0.121	1	-0.0853069	0.121	0.146	1	-0.305012
Ampd1
Ampd2													0.222104	0.096	0.066	0.012691	-0.804814	0.096	0.047	3.21e-24	-0.58271	0.047	0.066	0.0102147	-0.39169	0.023	0.025	1	-0.0536191	0.023	0.015	6.61e-05	-0.445309	0.015	0.025	0.00146918	0.364378	0.057	0.048	1	-0.387972	0.057	0.031	1	-0.0235934	0.031	0.048	1	-0.281527
Ampd3	-0.389084	0.216	0.265	4.24e-27	-0.472095	0.216	0.18	2.68e-22	-0.861179	0.18	0.265	2.65e-116	1.12798	0.023	0.009	1	0.535581	0.023	0.03	1	1.66357	0.03	0.009	1	-0.199098	0.103	0.101	1	0.0473569	0.103	0.075	1.59e-06	-0.151741	0.075	0.101	9.01e-13	0.0757434	0.089	0.088	1	0.377345	0.089	0.106	1	0.453089	0.106	0.088	1	0.299505
Amph	-1.1178	0.028	0.053	3.33e-28	0.326001	0.028	0.034	1	-0.791798	0.034	0.053	3.44e-16																									3.93815	0.012	0	1	-3.39131	0.012	0.001	1
Amt	0.729817	0.02	0.01	1	0.14282	0.02	0.022	0.596921	0.872637	0.022	0.01	1	0.330624	0.021	0.016	1	0.0751948	0.021	0.02	1	0.405819	0.02	0.016	1													0.123939	0.018	0.017	1	0.251325	0.018	0.023	1	0.375264	0.023	0.017	1	3.24278
Amtn
Amy1	0.197929	0.441	0.393	7.61e-05	0.034996	0.441	0.467	1	0.232926	0.467	0.393	1.78e-16	0.00632972	0.094	0.078	1	0.590765	0.094	0.117	1	0.597094	0.117	0.078	1	0.908028	0.057	0.026	0.0160627	0.130664	0.057	0.041	4.09e-09	1.03869	0.041	0.026	1	-0.216847	0.128	0.15	1	0.78045	0.128	0.154	1	0.563603	0.154	0.15	1	1.37927
Amy2a1
Amy2a2
Amy2a3
Amy2a4
Amy2a5
Amz1
Amz2	0.115297	0.118	0.104	1	-0.520484	0.118	0.088	6.57e-13	-0.405187	0.088	0.104	1.39e-16	-0.163393	0.118	0.099	1	-0.097553	0.118	0.094	0.234534	-0.260946	0.094	0.099	1	0.0815516	0.069	0.054	1	-0.379831	0.069	0.039	1.16e-14	-0.298279	0.039	0.054	7.55e-10	-0.0269496	0.089	0.085	1	-0.151327	0.089	0.052	1	-0.178276	0.052	0.085	1	0.818305
Anapc1	-0.202185	0.252	0.274	0.000348684	0.184176	0.252	0.295	8.22e-05	-0.0180089	0.295	0.274	1	-0.210467	0.212	0.188	1	0.386236	0.212	0.219	1	0.175769	0.219	0.188	1	0.041233	0.184	0.154	1	0.44397	0.184	0.176	1	0.485203	0.176	0.154	1	0.00903006	0.298	0.282	1	0.348888	0.298	0.272	1	0.357918	0.272	0.282	1	0.160373
Anapc10	-0.0451551	0.188	0.184	1	0.0386462	0.188	0.199	1	-0.00650891	0.199	0.184	1	0.00685578	0.125	0.097	1	0.00852536	0.125	0.104	0.263548	0.0153811	0.104	0.097	1	0.0767464	0.112	0.089	1	-0.0124111	0.112	0.076	1.39e-10	0.0643353	0.076	0.089	0.0921936	0.0344491	0.146	0.112	1	0.430826	0.146	0.138	1	0.465275	0.138	0.112	1	0.411739
Anapc11	0.624096	0.067	0.045	1	-1.20643	0.067	0.035	7.33e-06	-0.582331	0.035	0.045	1	-0.00730678	0.048	0.042	1	-0.123812	0.048	0.039	1	-0.131119	0.039	0.042	1	-0.0487265	0.047	0.044	1	0.0598449	0.047	0.031	1	0.0111184	0.031	0.044	1	-0.969664	0.051	0.065	1	0.316052	0.051	0.038	1	-0.653612	0.038	0.065	1	-1.47793
Anapc13	0.55063	0.021	0.01	1	-3.25836	0.021	0.002	0.044399	-2.70773	0.002	0.01	0.000133625	0.0140621	0.012	0.01	1	0.235171	0.012	0.011	1	0.249233	0.011	0.01	1	-0.245432	0.02	0.016	1	0.614603	0.02	0.015	1	0.36917	0.015	0.016	1	1.23498	0.03	0.014	1	-0.508252	0.03	0.016	1	0.726733	0.016	0.014	1	-2.35515
Anapc15	0.451235	0.017	0.014	1	-0.67616	0.017	0.014	1	-0.224925	0.014	0.014	1													-0.262135	0.01	0.009	1	0.264659	0.01	0.008	1					-0.176328	0.012	0.01	1	-0.351242	0.012	0.004	1	-0.52757	0.004	0.01	1
Anapc15-ps
Anapc16	-0.249124	0.202	0.223	8.29e-05	-0.209604	0.202	0.198	0.000370084	-0.458728	0.198	0.223	8.42e-30	0.507874	0.143	0.09	4.01e-06	-0.779731	0.143	0.083	4.35e-31	-0.271858	0.083	0.09	0.0116548	0.499395	0.116	0.072	0.000162365	-0.871609	0.116	0.051	2.4e-55	-0.372214	0.051	0.072	2.61e-14	0.534828	0.152	0.082	1	-0.029789	0.152	0.121	1	0.505039	0.121	0.082	1	-0.591448
Anapc2	0.677202	0.06	0.034	1	-1.47552	0.06	0.025	5.17e-31	-0.798319	0.025	0.034	3.26e-12	0.0313829	0.095	0.071	1	-0.588274	0.095	0.052	2.06e-18	-0.556891	0.052	0.071	0.00157172	-0.0825082	0.071	0.062	1	-0.410635	0.071	0.035	3.23e-24	-0.493143	0.035	0.062	1.88e-12	-1.27254	0.065	0.109	1	0.319176	0.065	0.047	1	-0.95336	0.047	0.109	1	0.865778
Anapc4	0.222406	0.147	0.127	1	-0.311276	0.147	0.131	0.129654	-0.08887	0.131	0.127	1	-0.045576	0.194	0.159	1	-0.0592663	0.194	0.155	0.0223358	-0.104842	0.155	0.159	1	0.109287	0.127	0.101	1	-0.179677	0.127	0.077	1.15e-16	-0.0703893	0.077	0.101	3.28e-05	-0.351722	0.149	0.177	1	0.233816	0.149	0.144	1	-0.117905	0.144	0.177	1	-0.0627095
Anapc5	0.518234	0.348	0.245	6.11e-35	-0.791294	0.348	0.257	6.87e-93	-0.27306	0.257	0.245	1.17e-10	-0.0570976	0.335	0.281	1	-0.15431	0.335	0.264	1.86e-15	-0.211408	0.264	0.281	7.57e-07	0.312869	0.176	0.132	0.0264345	-0.151089	0.176	0.122	9.32e-31	0.16178	0.122	0.132	1.13e-06	-0.0850607	0.283	0.259	1	0.214319	0.283	0.226	1	0.129258	0.226	0.259	1	-0.00677511
Anapc7	0.134973	0.116	0.103	1	-0.699932	0.116	0.078	1.64e-21	-0.564959	0.078	0.103	8.55e-11	0.231963	0.074	0.049	1	0.0540222	0.074	0.062	1	0.285985	0.062	0.049	1	-0.0179283	0.037	0.032	1	-0.0904016	0.037	0.022	4.3e-07	-0.10833	0.022	0.032	0.000755689	-0.32808	0.065	0.082	1	-1.03001	0.065	0.029	1	-1.35809	0.029	0.082	1	1.61715
Ancv1r																																					-4.58772	0	0.01	1	5.46756	0	0.029	1	0.879838	0.029	0.01	1
Ang													0.372778	0.021	0.013	1	-0.311701	0.021	0.016	1	0.0610776	0.016	0.013	1
Ang2
Ang4
Ang5
Ang6
Angel1	0.317396	0.016	0.016	1	-0.883491	0.016	0.013	1	-0.566095	0.013	0.016	1	-0.292518	0.018	0.016	1	-0.594187	0.018	0.01	0.0120189	-0.886705	0.01	0.016	1	-0.679496	0.011	0.013	1	0.842173	0.011	0.011	1	0.162678	0.011	0.013	1													0.00417912
Angel2	0.0588661	0.169	0.154	1	-0.211042	0.169	0.157	7.75e-08	-0.152176	0.157	0.154	5.3e-06	-0.232945	0.145	0.126	1	0.0273318	0.145	0.121	0.0001537	-0.205613	0.121	0.126	1	0.112893	0.132	0.098	1	0.0634221	0.132	0.1	9.66e-08	0.176315	0.1	0.098	1	-0.147593	0.116	0.119	1	0.0544389	0.116	0.102	1	-0.0931541	0.102	0.119	1	0.381337
Angpt1	-0.944716	0.535	0.585	3.18e-98	0.952677	0.535	0.661	7.02e-175	0.00796043	0.661	0.585	0.0148172	-0.128389	0.354	0.296	1	0.736514	0.354	0.424	8.26e-16	0.608125	0.424	0.296	2.5e-14													-0.385773	0.176	0.18	1	0.665385	0.176	0.154	1	0.279612	0.154	0.18	1	1.73502
Angpt2	-0.26203	0.022	0.026	1	1.72005	0.022	0.072	2.82e-45	1.45802	0.072	0.026	2.73e-41	-0.686707	0.017	0.017	1	0.797586	0.017	0.021	1	0.110879	0.021	0.017	1	-0.297643	0.039	0.039	1	0.419643	0.039	0.036	1	0.122	0.036	0.039	1	-0.459165	0.012	0.02	1	1.50268	0.012	0.031	1	1.04352	0.031	0.02	1	-0.538924
Angpt4
Angptl1	-0.194253	0.018	0.022	1	0.908551	0.018	0.037	1.63e-13	0.714298	0.037	0.022	3.53e-06	-1.37861	0.011	0.019	1	1.73771	0.011	0.025	1	0.359109	0.025	0.019	1													-1.07801	0.015	0.027	1	2.26077	0.015	0.051	1	1.18276	0.051	0.027	1
Angptl2	-0.238518	0.039	0.063	1	0.0673521	0.039	0.06	1	-0.171166	0.06	0.063	1	0.51507	0.415	0.268	1.11e-31	-0.44489	0.415	0.281	2.71e-37	0.0701798	0.281	0.268	1													0.431275	0.065	0.054	1	-0.357877	0.065	0.048	1	0.0733984	0.048	0.054	1	0.0810103
Angptl3	-0.773983	0.018	0.028	3.14e-06	1.01776	0.018	0.038	3.57e-15	0.243778	0.038	0.028	1	-0.129095	0.021	0.016	1	0.777093	0.021	0.028	1	0.647999	0.028	0.016	1													-0.269224	0.009	0.017	1	1.01007	0.009	0.016	1	0.740844	0.016	0.017	1
Angptl4	-1.33446	0.006	0.01	3e-07	1.15488	0.006	0.014	4.3e-18	-0.179578	0.014	0.01	1	-0.226878	0.013	0.013	1	-0.746546	0.013	0.006	1	-0.973423	0.006	0.013	1	0.473195	0.022	0.015	1	-0.722947	0.022	0.008	0.000372886	-0.249752	0.008	0.015	1
Angptl6
Angptl7	-0.550947	0.008	0.011	1	1.65155	0.008	0.028	3.58e-26	1.10061	0.028	0.011	1.95e-16	0.65833	0.01	0.006	1	0.689016	0.01	0.012	1	1.34735	0.012	0.006	1
Angptl8																																					-0.40355	0.021	0.02	1	1.1978	0.021	0.023	1	0.794253	0.023	0.02	1
Ank	0.0530825	0.816	0.818	1	-0.0269298	0.816	0.864	1	0.0261527	0.864	0.818	1	2.99497	0.063	0.005	2.32e-24	0.472206	0.063	0.068	3.07e-57	3.46718	0.068	0.005	0.0356612	6.04861	0.046	0	2.8e-05	0.246386	0.046	0.041	2.08e-78	6.295	0.041	0	6.25e-30	0.236569	0.193	0.139	1	-0.080271	0.193	0.137	0.026552	0.156298	0.137	0.139	1	6.71139
Ank1	-0.269723	0.372	0.414	2.33e-32	0.288261	0.372	0.449	6.92e-47	0.0185375	0.449	0.414	1																									3.97905	0.018	0	1	-5.20355	0.018	0	1
Ank2	-0.279301	0.947	0.964	1.45e-145	0.220869	0.947	0.975	8.53e-96	-0.0584317	0.975	0.964	3.13e-09	0.27086	0.807	0.687	8.51e-21	0.0901475	0.807	0.814	1	0.361007	0.814	0.687	1.87e-31													0.448651	0.003	0.01	1					-6.02358	0	0.01	1.66e-10
Ank3	0.0818398	0.914	0.925	2.66e-09	-0.0349281	0.914	0.956	0.0133539	0.0469117	0.956	0.925	1																									4.88509	0.018	0	1	-6.10958	0.018	0	5.9e-15
Ankar																																					3.77343	0.015	0	1	-1.83775	0.015	0.003	1
Ankdd1a
Ankdd1b	0.205362	0.021	0.015	1	-0.405919	0.021	0.016	1	-0.200557	0.016	0.015	1													-0.573097	0.01	0.011	1	0.648933	0.01	0.012	1	0.0758358	0.012	0.011	1	-0.988447	0.015	0.017	1	2.23336	0.015	0.044	1	1.24491	0.044	0.017	1
Ankef1
Ankfn1
Ankfy1	0.169799	0.175	0.166	1	-0.0292284	0.175	0.188	1	0.140571	0.188	0.166	1	-0.217286	0.253	0.234	1	0.106311	0.253	0.229	1	-0.110974	0.229	0.234	1	-0.111357	0.231	0.213	1	0.119771	0.231	0.184	0.000240787	0.00841372	0.184	0.213	0.124526	-0.514924	0.28	0.286	1	0.402972	0.28	0.261	1	-0.111953	0.261	0.286	1	0.0399578
Ankhd1	-0.0540563	0.55	0.548	1	0.124669	0.55	0.608	5.16e-15	0.0706126	0.608	0.548	0.00188753	0.0123015	0.422	0.349	1	0.221077	0.422	0.417	1	0.233378	0.417	0.349	1	-0.0162048	0.355	0.319	1	0.384538	0.355	0.332	1	0.368333	0.332	0.319	1	0.223346	0.455	0.384	1	0.280464	0.455	0.447	1	0.50381	0.447	0.384	1	0.255522
Ankib1	0.0989036	0.362	0.334	1	0.0581566	0.362	0.396	0.745668	0.15706	0.396	0.334	7.05e-05	0.118277	0.317	0.24	0.00200121	0.0580071	0.317	0.28	1	0.176284	0.28	0.24	1	0.0404804	0.187	0.158	1	0.261997	0.187	0.159	1	0.302477	0.159	0.158	1	0.346238	0.271	0.211	1	0.282145	0.271	0.237	1	0.628383	0.237	0.211	1	0.0722709
Ankk1
Ankle1
Ankle2	-0.139705	0.126	0.124	1	-0.0786667	0.126	0.125	1	-0.218372	0.125	0.124	1	-0.274283	0.086	0.08	1	0.206037	0.086	0.076	1	-0.0682457	0.076	0.08	1	-0.177662	0.07	0.065	1	-0.058092	0.07	0.046	3.74e-06	-0.235754	0.046	0.065	0.00221542	-0.95866	0.092	0.105	1	0.813121	0.092	0.089	1	-0.145539	0.089	0.105	1	-0.0490463
Ankmy1	0.466031	0.026	0.017	1	-0.171589	0.026	0.023	1	0.294442	0.023	0.017	1
Ankmy2	-0.207402	0.092	0.103	1	0.0988456	0.092	0.101	1	-0.108557	0.101	0.103	1	-0.158215	0.078	0.065	1	0.487046	0.078	0.082	1	0.328831	0.082	0.065	1	-0.0680736	0.058	0.049	1	0.0453591	0.058	0.037	5.18e-08	-0.0227145	0.037	0.049	0.819292	-0.655687	0.089	0.099	1	1.09195	0.089	0.111	1	0.436265	0.111	0.099	1	-0.777453
Ankra2	0.0568282	0.09	0.079	0.0447785	-0.646509	0.09	0.062	1.13e-30	-0.589681	0.062	0.079	8.42e-09	0.101037	0.068	0.049	1	-0.615262	0.068	0.038	2.3e-13	-0.514225	0.038	0.049	1	0.457286	0.068	0.045	1	-0.865042	0.068	0.025	1.09e-39	-0.407755	0.025	0.045	9.8e-14	-0.178851	0.092	0.071	1	-0.702975	0.092	0.048	1	-0.881826	0.048	0.071	1	0.143352
Ankrd1	1.61143	0.515	0.266	0	-0.661313	0.515	0.351	2.37e-161	0.950117	0.351	0.266	1.2e-122	-0.484955	0.009	0.012	3.35e-37					-8.28322	0	0.012	0.151392	-0.380802	0.047	0.06	7.97e-10	-12.0959	0.047	0	4.78e-79	-12.4767	0	0.06	8.45e-15	-0.0198281	0.068	0.044	0.816491	-7.97338	0.068	0	3.31e-08	-7.99321	0	0.044	1	-0.269098
Ankrd10	0.0145214	0.437	0.41	1	-0.245821	0.437	0.442	7.64e-09	-0.231299	0.442	0.41	1.55e-15	0.760902	0.159	0.079	0.000578599	-0.0785263	0.159	0.142	1.2e-13	0.682376	0.142	0.079	1	0.487825	0.096	0.056	1	0.247087	0.096	0.083	2.47e-23	0.734912	0.083	0.056	5.4e-14	0.296217	0.176	0.122	1	0.30055	0.176	0.166	1	0.596767	0.166	0.122	1	-1.03939
Ankrd11	0.0604308	0.706	0.689	1	-0.163744	0.706	0.73	7.09e-05	-0.103313	0.73	0.689	1	-0.0187136	0.575	0.499	1	0.00381193	0.575	0.529	1	-0.0149017	0.529	0.499	1	-0.0622522	0.49	0.463	1	0.183517	0.49	0.445	1	0.121265	0.445	0.463	1	-0.0303227	0.539	0.524	1	0.051491	0.539	0.476	1	0.0211682	0.476	0.524	1	-0.0216628
Ankrd12	0.431988	0.472	0.38	6.84e-57	-0.423269	0.472	0.42	7.58e-52	0.008719	0.42	0.38	1	0.512405	0.577	0.391	1.3e-47	-0.618634	0.577	0.393	6.13e-83	-0.106229	0.393	0.391	1	0.371937	0.49	0.354	8.01e-30	-0.316126	0.49	0.329	7.88e-59	0.055811	0.329	0.354	1	-0.0550437	0.58	0.534	1	-0.00491623	0.58	0.517	1	-0.0599599	0.517	0.534	1	0.552048
Ankrd13a	0.692643	0.062	0.043	0.0469359	-0.336843	0.062	0.055	7.27e-07	0.3558	0.055	0.043	1	0.419701	0.075	0.051	0.0533565	-1.06825	0.075	0.034	1.57e-27	-0.648547	0.034	0.051	2.4e-05	0.176748	0.127	0.11	1	-0.948314	0.127	0.05	3.41e-69	-0.771566	0.05	0.11	3.06e-43	-0.109725	0.131	0.133	1	-0.485881	0.131	0.077	1	-0.595606	0.077	0.133	1	0.520222
Ankrd13b	-0.0144659	0.064	0.058	1	-0.956196	0.064	0.038	2.28e-30	-0.970662	0.038	0.058	3.18e-31	0.546435	0.031	0.016	1	-1.25567	0.031	0.01	2.02e-18	-0.70924	0.01	0.016	0.000528925													0.511893	0.015	0.007	1	-0.504987	0.015	0.006	1
Ankrd13c	0.0859018	0.231	0.217	1	0.184009	0.231	0.272	0.344487	0.26991	0.272	0.217	2.32e-05	-0.116375	0.156	0.143	1	0.228585	0.156	0.152	1	0.112209	0.152	0.143	1	-0.0200105	0.147	0.139	1	0.283475	0.147	0.122	0.0195106	0.263465	0.122	0.139	1	-0.160507	0.193	0.218	1	0.19476	0.193	0.175	1	0.0342531	0.175	0.218	1	0.124638
Ankrd13d													0.0844551	0.01	0.008	1	0.0809395	0.01	0.009	1																	-1.89203	0.006	0.01	1					-0.390318	0.009	0.01	1
Ankrd16	0.495498	0.143	0.103	3.98e-14	-0.298483	0.143	0.139	6.05e-14	0.197015	0.139	0.103	1	0.389915	0.098	0.061	0.00939985	-0.175036	0.098	0.074	1.9e-11	0.214879	0.074	0.061	1	0.651438	0.063	0.041	0.021161	-0.318864	0.063	0.038	1.44e-21	0.332575	0.038	0.041	0.804716	-0.0524065	0.11	0.099	1	-0.111304	0.11	0.066	1	-0.163711	0.066	0.099	1	-0.121041
Ankrd17	-0.148269	0.715	0.734	3.71e-14	0.384861	0.715	0.823	4.49e-142	0.236591	0.823	0.734	5.1e-57	0.0324435	0.512	0.439	1	0.285597	0.512	0.54	1	0.31804	0.54	0.439	8.22e-07	0.147084	0.412	0.341	0.491002	0.44739	0.412	0.409	1	0.594474	0.409	0.341	9.36e-08	-0.151825	0.554	0.52	1	0.335735	0.554	0.543	1	0.18391	0.543	0.52	1	0.0563061
Ankrd2
Ankrd22
Ankrd23	-0.895691	0.043	0.076	1.54e-45	1.17684	0.043	0.121	2.82e-180	0.281147	0.121	0.076	4.54e-43
Ankrd24	-0.200442	0.032	0.028	1	-0.514377	0.032	0.019	2.98e-06	-0.714819	0.019	0.028	6.47e-08	-0.00536947	0.013	0.008	1	-0.808394	0.013	0.005	0.0952859					0.202191	0.034	0.024	1	-0.881541	0.034	0.013	2.01e-13	-0.679351	0.013	0.024	0.0400583	0.395164	0.098	0.061	1	-1.06701	0.098	0.028	0.484695	-0.671841	0.028	0.061	1	-0.430444
Ankrd26	0.105322	0.071	0.062	1	-0.493982	0.071	0.054	1.52e-08	-0.38866	0.054	0.062	8.54e-08	0.360471	0.075	0.048	1	-0.543897	0.075	0.041	2.06e-10	-0.183427	0.041	0.048	1	0.137195	0.042	0.03	1	-0.481493	0.042	0.018	7.32e-17	-0.344298	0.018	0.03	3e-09	0.882876	0.062	0.034	1	0.235428	0.062	0.052	1	1.1183	0.052	0.034	1	0.360063
Ankrd27	0.359829	0.082	0.065	1	-0.633204	0.082	0.056	4.29e-12	-0.273375	0.056	0.065	0.13413	-0.0288458	0.18	0.149	1	-0.255901	0.18	0.134	3.25e-07	-0.284747	0.134	0.149	1	0.0478559	0.083	0.066	1	-0.118235	0.083	0.049	9.63e-12	-0.0703788	0.049	0.066	0.0326932	-0.195172	0.098	0.099	1	-0.620333	0.098	0.044	1	-0.815505	0.044	0.099	1	1.25932
Ankrd28	-0.313249	0.426	0.466	2.98e-23	0.2874	0.426	0.504	1.03e-28	-0.0258492	0.504	0.466	1	-0.0792905	0.226	0.186	1	0.438753	0.226	0.232	1	0.359462	0.232	0.186	1	-0.349392	0.179	0.188	1	0.987719	0.179	0.242	8.06e-12	0.638326	0.242	0.188	0.14415	-0.184965	0.134	0.109	1	0.0827799	0.134	0.098	1	-0.102185	0.098	0.109	1	-0.265375
Ankrd29	-0.482898	0.082	0.108	8.61e-08	-0.139373	0.082	0.079	1	-0.622271	0.079	0.108	3.39e-17	0.829992	0.017	0.007	1	-0.955019	0.017	0.006	2.89e-07					0.262701	0.041	0.03	1	-0.66339	0.041	0.017	6.7e-17	-0.400688	0.017	0.03	7.89e-05	-0.952992	0.012	0.003	1	0.327087	0.012	0.012	1	-0.625905	0.012	0.003	1	-0.383315
Ankrd31
Ankrd33
Ankrd33b	-0.234426	0.316	0.353	2.87e-08	-0.371834	0.316	0.28	1.52e-21	-0.60626	0.28	0.353	1.2e-70													-0.305513	0.134	0.127	1	-0.304232	0.134	0.085	9.26e-23	-0.609744	0.085	0.127	6.72e-25	-0.0756867	0.232	0.153	1	0.19636	0.232	0.183	1	0.120673	0.183	0.153	1	-0.366587
Ankrd34a
Ankrd34b
Ankrd34c
Ankrd35													-0.311083	0.035	0.036	1	-0.108123	0.035	0.027	1	-0.419206	0.027	0.036	1
Ankrd36																																					-1.04799	0.006	0.01	1					-2.12027	0.001	0.01	1
Ankrd37																									0.219147	0.061	0.039	1	-1.78777	0.061	0.014	3.65e-56	-1.56862	0.014	0.039	1.3e-22	1.23272	0.018	0.007	1	-1.96103	0.018	0.006	1					0.882574
Ankrd39	-0.457385	0.045	0.057	6.23e-05	0.202184	0.045	0.063	1	-0.255201	0.063	0.057	1	0.645556	0.013	0.009	1	0.352569	0.013	0.015	1	0.998125	0.015	0.009	1	0.0258014	0.01	0.006	1	0.626663	0.01	0.012	1	0.652464	0.012	0.006	1	3.45326	0.033	0.003	1	-0.83072	0.033	0.017	1	2.62254	0.017	0.003	1
Ankrd40	0.0473557	0.294	0.266	1	-0.470602	0.294	0.232	3.91e-31	-0.423247	0.232	0.266	4.26e-20	0.372541	0.066	0.05	1	-0.488747	0.066	0.043	1.2e-10	-0.116206	0.043	0.05	8.22e-05	0.113676	0.063	0.059	1	-0.284399	0.063	0.035	8.79e-21	-0.170723	0.035	0.059	1.14e-19	0.0711232	0.071	0.051	1	-0.387654	0.071	0.041	1	-0.316531	0.041	0.051	1	0.888918
Ankrd42	0.853135	0.033	0.02	0.939492	-0.0999209	0.033	0.035	1	0.753214	0.035	0.02	0.319664	0.495661	0.021	0.014	1	0.450074	0.021	0.022	1	0.945735	0.022	0.014	1	0.900801	0.01	0.005	1	0.377807	0.01	0.007	1					0.264386	0.018	0.017	1	-0.471719	0.018	0.012	1	-0.207333	0.012	0.017	1	4.017
Ankrd44	-0.109209	0.059	0.078	1	0.468395	0.059	0.107	4.46e-07	0.359186	0.107	0.078	1	-0.237032	0.268	0.254	1	0.777072	0.268	0.344	1.74e-15	0.540039	0.344	0.254	1.45e-14	0.0866518	0.498	0.432	0.525274	0.294952	0.498	0.465	1	0.381604	0.465	0.432	1e-08	-0.105129	0.339	0.344	1	0.49335	0.339	0.345	1	0.388221	0.345	0.344	1	0.30495
Ankrd45	-0.716085	0.008	0.01	1					-0.353672	0.009	0.01	1
Ankrd46	-0.0525069	0.032	0.032	1	-0.162801	0.032	0.035	1	-0.215308	0.035	0.032	1	0.0193774	0.067	0.052	1	0.0978157	0.067	0.057	1	0.117193	0.057	0.052	1	0.079582	0.044	0.034	1	-0.0129474	0.044	0.026	1e-05	0.0666346	0.026	0.034	1	0.668453	0.089	0.058	1	-0.730951	0.089	0.044	1	-0.0624981	0.044	0.058	1	2.44742
Ankrd49	-0.0430067	0.062	0.055	1	-0.625916	0.062	0.042	3.47e-10	-0.668923	0.042	0.055	8.15e-12	0.221483	0.025	0.018	1	-0.632398	0.025	0.014	0.00839153	-0.410915	0.014	0.018	1	0.363043	0.021	0.012	1	-0.3096	0.021	0.011	0.00595984	0.0534435	0.011	0.012	1	-0.051939	0.03	0.02	1	-0.545541	0.03	0.015	1	-0.59748	0.015	0.02	1	-0.694052
Ankrd50	-0.169143	0.093	0.095	1	-0.383921	0.093	0.074	1	-0.553063	0.074	0.095	5.53e-10	-0.0432788	0.09	0.075	1	0.266115	0.09	0.088	1	0.222836	0.088	0.075	1	0.171713	0.07	0.057	1	-0.437394	0.07	0.032	6.82e-19	-0.26568	0.032	0.057	9.28e-12	0.565656	0.095	0.071	1	-0.236369	0.095	0.07	1	0.329287	0.07	0.071	1	0.743539
Ankrd52	-0.209602	0.15	0.159	1	-0.0111468	0.15	0.152	1	-0.220749	0.152	0.159	0.000217329	0.161672	0.099	0.071	1	-0.244599	0.099	0.069	1.25e-06	-0.0829278	0.069	0.071	1	0.445773	0.057	0.034	1	-0.0816412	0.057	0.034	3.15e-14	0.364131	0.034	0.034	1	-0.740791	0.048	0.061	1	0.805895	0.048	0.048	1	0.0651038	0.048	0.061	1	-0.619552
Ankrd53
Ankrd54	0.536829	0.023	0.013	1	-0.721212	0.023	0.016	1.33e-10	-0.184383	0.016	0.013	0.0256957	0.415428	0.028	0.018	1	-0.286542	0.028	0.021	0.14124	0.128885	0.021	0.018	1	-0.144849	0.024	0.02	1	0.25445	0.024	0.018	0.545761	0.1096	0.018	0.02	1	-0.0586234	0.027	0.031	1	0.142321	0.027	0.02	1	0.0836978	0.02	0.031	1	-1.45392
Ankrd55	1.57722	0.02	0.005	5.78e-21	-1.00276	0.02	0.009	6.83e-10																													-1.31751	0.015	0.014	1	0.655635	0.015	0.016	1	-0.661875	0.016	0.014	1
Ankrd6	0.444609	0.141	0.105	9.08e-11	-0.684727	0.141	0.102	9.23e-40	-0.240118	0.102	0.105	0.000276527	0.508121	0.126	0.075	9.9e-08	-0.862843	0.126	0.063	9.14e-32	-0.354722	0.063	0.075	0.264605													0.709936	0.214	0.116	1	-0.520699	0.214	0.134	1	0.189237	0.134	0.116	1
Ankrd60
Ankrd61	-1.15226	0.007	0.011	1	1.66473	0.007	0.02	0.0777606	0.512468	0.02	0.011	0.00643832					0.692676	0.009	0.011	1	0.775486	0.011	0.007	1													-0.377624	0.006	0.014	1	0.478578	0.006	0.01	1	0.100954	0.01	0.014	1
Ankrd63
Ankrd65
Ankrd66
Ankrd7
Ankrd9	-0.0337204	0.142	0.132	1	-0.675104	0.142	0.108	9.81e-36	-0.708825	0.108	0.132	1.42e-47
Anks1	-0.111879	0.564	0.579	5.15e-06	0.22694	0.564	0.663	1.61e-45	0.11506	0.663	0.579	4.66e-11	0.237571	0.251	0.175	0.000310674	-0.667531	0.251	0.146	1.16e-50	-0.42996	0.146	0.175	2.08e-16	0.098038	0.372	0.31	0.117392	-0.124916	0.372	0.271	6.85e-26	-0.0268783	0.271	0.31	6.57e-06	0.133427	0.244	0.218	1	-0.0429729	0.244	0.18	1	0.0904544	0.18	0.218	1	0.0393555
Anks1b	1.39405	0.014	0.004	1	-1.89463	0.014	0.004	1.66e-09					-0.131969	0.216	0.189	1	0.539861	0.216	0.237	1	0.407892	0.237	0.189	6.08e-05	0.341779	0.059	0.042	1	-0.69103	0.059	0.025	5.02e-21	-0.349251	0.025	0.042	5.59e-06	-0.152427	0.024	0.024	1	-1.40042	0.024	0.004	1	-1.55285	0.004	0.024	1	0.0324513
Anks3	0.279926	0.192	0.154	1	-0.260811	0.192	0.18	6.79e-11	0.0191153	0.18	0.154	0.536706	0.150285	0.108	0.077	1	-0.110515	0.108	0.084	7.21e-10	0.0397704	0.084	0.077	1	0.322982	0.074	0.056	1	-0.250081	0.074	0.048	6.12e-18	0.0729018	0.048	0.056	1.32e-07	0.0576827	0.11	0.088	1	-0.244565	0.11	0.07	1	-0.186882	0.07	0.088	1	1.11958
Anks4b
Anks6	-0.443975	0.031	0.043	1	-0.0643124	0.031	0.032	1	-0.508287	0.032	0.043	1.62e-09	-0.600522	0.059	0.071	1	-0.31353	0.059	0.039	0.0038482	-0.914052	0.039	0.071	1.04e-10	-0.373736	0.013	0.015	1	0.102466	0.013	0.009	1	-0.27127	0.009	0.015	1	-1.06558	0.021	0.031	1	0.430494	0.021	0.013	1	-0.63509	0.013	0.031	1	-1.13827
Ankub1
Ankzf1	0.399821	0.124	0.085	6.96e-09	-1.26557	0.124	0.059	4.68e-87	-0.865748	0.059	0.085	3.27e-33	-0.19202	0.029	0.026	1	-0.51569	0.029	0.017	1.52e-06	-0.707709	0.017	0.026	0.00203487	0.378563	0.021	0.012	1	-0.03759	0.021	0.014	2.36e-08	0.340973	0.014	0.012	1	0.708664	0.033	0.027	1	-1.90417	0.033	0.009	1	-1.19551	0.009	0.027	1	-0.152865
Anln																																					0.76422	0.012	0.01	1	-2.20658	0.012	0.003	1	-1.44236	0.003	0.01	1
Ano1																																					5.42808	0.03	0	1	-4.96937	0.03	0.001	0.497592
Ano10	-0.436921	0.156	0.203	8.37e-32	-0.0144268	0.156	0.174	1	-0.451348	0.174	0.203	5.06e-25	-0.0189656	0.119	0.097	1	-0.0658059	0.119	0.092	0.00179734	-0.0847715	0.092	0.097	1	-0.145298	0.084	0.073	1	0.155064	0.084	0.063	0.000563449	0.00976635	0.063	0.073	6.83e-05	-0.937374	0.077	0.099	1	0.611528	0.077	0.086	1	-0.325846	0.086	0.099	1	0.247508
Ano2																																					-0.331304	0.027	0.027	1	1.49987	0.027	0.035	1	1.16857	0.035	0.027	1
Ano3													0.37622	0.03	0.018	1	-0.371328	0.03	0.016	0.0409717	0.00489214	0.016	0.018	1
Ano4	-0.63442	0.605	0.703	6.85e-155	0.326704	0.605	0.687	5.78e-44	-0.307717	0.687	0.703	4.23e-44	9.43188	0.034	0	1	0.753572	0.034	0.037	2.62e-13	10.1854	0.037	0	0.114201													4.98624	0.018	0	1	-6.21074	0.018	0	1
Ano5	-0.330059	0.018	0.024	1	0.949315	0.018	0.039	2.55e-18	0.619256	0.039	0.024	7.92e-06
Ano6	-0.511911	0.049	0.084	2.76e-10	0.690908	0.049	0.102	1	0.178997	0.102	0.084	0.598524	-0.00975423	0.513	0.449	1	-0.160255	0.513	0.438	1.55e-06	-0.170009	0.438	0.449	1	0.139574	0.459	0.389	0.00417432	-0.0995679	0.459	0.35	1.68e-14	0.0400063	0.35	0.389	1	0.156419	0.476	0.395	1	0.0960226	0.476	0.415	1	0.252441	0.415	0.395	1	-0.261504
Ano7
Ano8	-0.104344	0.067	0.064	1	-0.661915	0.067	0.048	6.79e-23	-0.766258	0.048	0.064	3.06e-30	1.07728	0.033	0.012	1	-0.957715	0.033	0.016	5.87e-10	0.119561	0.016	0.012	1	1.66175	0.01	0.003	1	0.445892	0.01	0.01	1	2.10764	0.01	0.003	1	1.39759	0.045	0.02	1	-0.750782	0.045	0.015	1	0.64681	0.015	0.02	1	-0.412492
Ano9
Anp32a	-0.431458	0.133	0.168	2.57e-12	-0.444948	0.133	0.108	3.08e-10	-0.876406	0.108	0.168	6.02e-59	-0.133376	0.08	0.075	1	-0.666396	0.08	0.045	1.64e-16	-0.799772	0.045	0.075	6.22e-11	0.0479395	0.257	0.211	1	-0.88906	0.257	0.104	1.97e-120	-0.841121	0.104	0.211	3.2e-73	-0.317315	0.155	0.17	1	-0.25818	0.155	0.112	1	-0.575495	0.112	0.17	1	-0.1832
Anp32b	0.0440124	0.049	0.047	1	-1.19521	0.049	0.021	0.0344862	-1.15119	0.021	0.047	0.0352462	-0.0868154	0.082	0.071	1	-0.182756	0.082	0.057	0.110868	-0.269571	0.057	0.071	1	-0.066143	0.082	0.076	1	-0.185407	0.082	0.046	1.22e-10	-0.25155	0.046	0.076	2.26e-05	-0.272026	0.092	0.078	1	0.255159	0.092	0.064	1	-0.0168671	0.064	0.078	1	0.298966
Anp32e	0.0121715	0.062	0.054	1	-0.727475	0.062	0.037	1e-11	-0.715303	0.037	0.054	1.03e-06	-0.781181	0.015	0.018	1	0.275786	0.015	0.014	1	-0.505395	0.014	0.018	1	-0.163465	0.029	0.031	1	-0.010814	0.029	0.018	0.012605	-0.174279	0.018	0.031	0.0003348	-0.436346	0.021	0.02	1	0.835048	0.021	0.029	1	0.398702	0.029	0.02	1	-0.808197
Anpep													0.103842	0.114	0.087	1	-0.578529	0.114	0.067	5.02e-12	-0.474687	0.067	0.087	0.134025													-0.812863	0.048	0.058	1	-0.136537	0.048	0.029	1	-0.949399	0.029	0.058	1
Antxr1													0.148307	0.604	0.513	0.00486066	-0.485153	0.604	0.451	1.48e-46	-0.336847	0.451	0.513	1.49e-13													4.91757	0.027	0	1	-2.21486	0.027	0.004	1					2.88576
Antxr2	-0.263142	0.575	0.608	2.78e-24	0.38248	0.575	0.671	3.66e-70	0.119338	0.671	0.608	4.1e-06	0.00753943	0.397	0.342	1	0.304863	0.397	0.421	1	0.312402	0.421	0.342	0.00186494	1.96881	0.037	0.006	1	0.320074	0.037	0.028	1.75e-21	2.28888	0.028	0.006	3.11e-14	0.310652	0.101	0.041	1	0.0770043	0.101	0.055	1	0.387656	0.055	0.041	1	4.77786
Antxrl
Anxa1													0.254543	0.169	0.121	0.00155513	0.103002	0.169	0.131	0.0238252	0.357545	0.131	0.121	1	0.317276	0.022	0.016	1	-0.119893	0.022	0.012	0.00121263	0.197383	0.012	0.016	1	0.728284	0.039	0.02	1	0.537319	0.039	0.036	1	1.2656	0.036	0.02	1	-1.06519
Anxa10
Anxa11	0.447557	0.266	0.202	1.25e-21	-0.761052	0.266	0.187	1.04e-84	-0.313495	0.187	0.202	1.59e-15	0.576417	0.082	0.046	0.0174086	-0.245685	0.082	0.06	6.18e-12	0.330732	0.06	0.046	1	0.0708125	0.105	0.093	1	-0.180991	0.105	0.071	4.54e-15	-0.110179	0.071	0.093	5.33e-08	0.466788	0.193	0.143	1	-0.752523	0.193	0.103	0.975775	-0.285736	0.103	0.143	1	0.258961
Anxa2													0.308792	0.266	0.188	2.21e-09	-0.444594	0.266	0.168	9.28e-29	-0.135802	0.168	0.188	1	0.140413	0.186	0.155	1	-0.747809	0.186	0.084	2.07e-64	-0.607395	0.084	0.155	1.39e-33	-0.517872	0.173	0.187	1	0.484063	0.173	0.18	1	-0.0338095	0.18	0.187	1	-0.557664
Anxa3													0.0896186	0.227	0.174	0.00989565	0.343603	0.227	0.217	1	0.433222	0.217	0.174	0.0652158	0.155593	0.346	0.268	3.44e-07	0.275221	0.346	0.294	1	0.430814	0.294	0.268	0.0330176	-0.134952	0.274	0.279	1	0.464055	0.274	0.294	1	0.329104	0.294	0.279	1	0.386125
Anxa4	0.66723	0.094	0.056	2.24e-19	-0.632932	0.094	0.067	1.09e-18	0.034298	0.067	0.056	1	-0.0625451	0.088	0.072	1	-0.216503	0.088	0.064	0.00161261	-0.279048	0.064	0.072	1	0.0289585	0.061	0.053	1	0.0559567	0.061	0.043	0.000243118	0.0849152	0.043	0.053	1	-0.800307	0.048	0.075	1	0.649649	0.048	0.047	1	-0.150658	0.047	0.075	1	0.534806
Anxa5	0.277935	0.199	0.157	0.539812	-0.362435	0.199	0.178	0.00343054	-0.0845002	0.178	0.157	1	-0.448877	0.098	0.107	1	0.716525	0.098	0.134	1	0.267648	0.134	0.107	1	0.456456	0.099	0.07	1	0.0612497	0.099	0.065	4.87e-15	0.517706	0.065	0.07	0.131383	0.191885	0.048	0.061	1	0.215857	0.048	0.066	1	0.407742	0.066	0.061	1	-0.124419
Anxa6	-0.057111	0.328	0.324	1	-0.429713	0.328	0.284	7.51e-20	-0.486824	0.284	0.324	5.91e-42	0.134222	0.202	0.152	1	-0.132306	0.202	0.159	7.48e-07	0.00191623	0.159	0.152	1	0.403763	0.084	0.057	1	-0.325619	0.084	0.049	6.14e-21	0.0781444	0.049	0.057	1.12e-11	0.394382	0.217	0.184	1	-0.445039	0.217	0.135	1	-0.0506567	0.135	0.184	1	-0.302019
Anxa7	0.422106	0.176	0.132	0.00010027	-0.222696	0.176	0.17	1	0.199411	0.17	0.132	1	-0.0934587	0.14	0.125	1	0.302597	0.14	0.146	1	0.209138	0.146	0.125	1	-0.0699793	0.123	0.117	1	0.844058	0.123	0.159	0.072137	0.774079	0.159	0.117	0.0764483	0.0619726	0.202	0.167	1	-0.192966	0.202	0.134	1	-0.130993	0.134	0.167	1	0.451976
Anxa8
Anxa9													-0.265229	0.014	0.014	1	0.143568	0.014	0.011	1	-0.121661	0.011	0.014	1
Aoah																																					-1.05173	0.009	0.01	1					-6.19291	0	0.01	1
Aoc1
Aoc2																									0.867393	0.01	0.006	1	-0.94249	0.01	0.004	0.144427																	1.63308
Aoc3																									1.80809	0.012	0.004	1	-1.94455	0.012	0.002	2.96e-09																	0.749471
Aopep	0.127294	0.565	0.488	3.93e-14	0.587765	0.565	0.898	0	0.715059	0.898	0.488	0	0.276987	0.427	0.305	6.27e-14	0.32371	0.427	0.534	5.65e-12	0.600698	0.534	0.305	1.4e-62	0.451693	0.228	0.138	1.52e-16	0.66802	0.228	0.385	3.07e-65	1.11971	0.385	0.138	4.67e-165	0.199276	0.274	0.231	1	1.02087	0.274	0.614	2.14e-15	1.22014	0.614	0.231	3.42e-18	-0.426355
Aox1	0.679341	0.577	0.429	1.42e-148	-0.141322	0.577	0.575	0.000310446	0.538019	0.575	0.429	1.18e-105	-0.0819081	0.22	0.204	1	0.178218	0.22	0.212	0.059002	0.0963096	0.212	0.204	1													0.108963	0.208	0.16	1	-0.207605	0.208	0.146	1	-0.0986426	0.146	0.16	1
Aox2
Aox3													-0.743711	0.019	0.024	1	0.944258	0.019	0.028	1	0.200547	0.028	0.024	1
Aox4
Ap1ar	0.0370032	0.103	0.099	1	-0.147504	0.103	0.101	1	-0.110501	0.101	0.099	1	0.178508	0.092	0.068	1	-0.137312	0.092	0.075	0.707343	0.0411961	0.075	0.068	1	0.0915117	0.058	0.053	1	0.0528314	0.058	0.04	0.000449199	0.144343	0.04	0.053	0.0549454	0.413983	0.089	0.051	1	-0.598521	0.089	0.041	1	-0.184539	0.041	0.051	1	0.317224
Ap1b1	0.0113674	0.263	0.251	1	-0.161874	0.263	0.267	1	-0.150507	0.267	0.251	1	1.11843	0.026	0.011	1	0.34406	0.026	0.025	0.111416	1.46249	0.025	0.011	1	0.0261385	0.03	0.027	1	0.0396837	0.03	0.021	4.63e-08	0.0658223	0.021	0.027	3.13e-07	0.482935	0.086	0.061	1	-0.116411	0.086	0.052	1	0.366525	0.052	0.061	1	1.44753
Ap1g1	-0.13905	0.334	0.341	1	0.311137	0.334	0.412	1.32e-29	0.172087	0.412	0.341	2.35e-11	0.0400981	0.248	0.204	1	0.293714	0.248	0.258	1	0.333812	0.258	0.204	1	-0.135655	0.212	0.197	1	0.390773	0.212	0.188	1	0.255118	0.188	0.197	1	-0.0943803	0.247	0.289	1	0.411049	0.247	0.236	1	0.316669	0.236	0.289	1	-0.174049
Ap1g2	0.92778	0.023	0.011	0.00603699	-1.0871	0.023	0.013	2.48e-08	-0.15932	0.013	0.011	1	0.252277	0.013	0.007	1	-0.195038	0.013	0.008	1					0.821727	0.016	0.01	1	-0.81815	0.016	0.007	0.0106072	0.00357693	0.007	0.01	1	-0.710489	0.015	0.024	1	0.501528	0.015	0.01	1	-0.208961	0.01	0.024	1	-2.51678
Ap1m1	-0.16424	0.077	0.084	1	-0.758468	0.077	0.059	2.71e-23	-0.922708	0.059	0.084	4.24e-43	0.346999	0.082	0.054	1	-0.561045	0.082	0.049	1.19e-17	-0.214045	0.049	0.054	0.0070419	0.215352	0.054	0.037	1	-0.0575428	0.054	0.036	6.23e-09	0.157809	0.036	0.037	0.261491	0.900919	0.086	0.044	1	-0.57483	0.086	0.036	1	0.326089	0.036	0.044	1	1.50131
Ap1m2
Ap1s1	0.148997	0.035	0.03	1	-0.968833	0.035	0.021	2.28e-05	-0.819836	0.021	0.03	2.56e-07	0.646064	0.064	0.034	0.00401635	-0.988075	0.064	0.027	3.46e-18	-0.342011	0.027	0.034	1	-0.0949972	0.039	0.031	1	-0.458917	0.039	0.019	5.85e-10	-0.553914	0.019	0.031	0.000492624	-0.0419309	0.054	0.034	1	-0.196708	0.054	0.032	1	-0.238639	0.032	0.034	1	-0.624526
Ap1s2	0.55747	0.065	0.045	2.87e-09	-0.0407406	0.065	0.067	1	0.516729	0.067	0.045	1.49e-08	-0.0111471	0.12	0.099	1	0.298954	0.12	0.117	1	0.287807	0.117	0.099	1	0.129327	0.079	0.066	1	0.7118	0.079	0.076	1	0.841127	0.076	0.066	1	0.350777	0.039	0.024	1	-0.336052	0.039	0.019	1	0.0147251	0.019	0.024	1	0.441152
Ap1s3
Ap2a1	0.143155	0.121	0.103	1	-0.94519	0.121	0.069	2.95e-52	-0.802036	0.069	0.103	8.68e-38	0.345259	0.103	0.064	1	-0.667048	0.103	0.054	6.59e-19	-0.321789	0.054	0.064	0.000454023	-0.0344699	0.092	0.076	1	-0.198253	0.092	0.057	1.5e-13	-0.232723	0.057	0.076	1.99e-08	-0.312912	0.101	0.092	1	-0.0497788	0.101	0.058	1	-0.362691	0.058	0.092	1	0.0793534
Ap2a2	-0.166348	0.09	0.098	1	-0.427485	0.09	0.078	4.52e-12	-0.593833	0.078	0.098	3.23e-09	0.150166	0.261	0.209	0.0196788	-0.494509	0.261	0.177	4.97e-26	-0.344343	0.177	0.209	0.000224651	-0.0834545	0.136	0.13	1	-0.23681	0.136	0.088	2.3e-21	-0.320265	0.088	0.13	2.88e-15	-0.437462	0.155	0.15	1	0.114292	0.155	0.116	1	-0.32317	0.116	0.15	1	-0.617479
Ap2b1	0.172009	0.321	0.293	1	0.428095	0.321	0.427	1.17e-55	0.600104	0.427	0.293	1.31e-79	0.0686271	0.28	0.22	0.0290458	0.111589	0.28	0.256	1	0.180217	0.256	0.22	1	0.0117443	0.209	0.181	1	0.296016	0.209	0.191	1	0.30776	0.191	0.181	1	-0.228687	0.238	0.276	1	0.511573	0.238	0.285	1	0.282887	0.285	0.276	1	-0.140709
Ap2m1	1.08534	0.013	0.006	1	-3.05658	0.013	0.004	0.0552016					0.0886797	0.034	0.024	1	-0.336653	0.034	0.022	1	-0.247973	0.022	0.024	1	0.326586	0.041	0.03	1	-0.133612	0.041	0.024	0.0844513	0.192974	0.024	0.03	1	-1.08513	0.027	0.044	1	0.756685	0.027	0.02	1	-0.328449	0.02	0.044	1	-0.786481
Ap2s1	0.427762	0.026	0.018	1	-2.9907	0.026	0.004	2.51e-12	-2.56293	0.004	0.018	4.87e-16	0.0757865	0.035	0.028	1	-0.581825	0.035	0.018	0.0614133	-0.506038	0.018	0.028	1	0.0834572	0.046	0.036	1	-0.584209	0.046	0.018	2.29e-13	-0.500751	0.018	0.036	5.41e-07	-0.146853	0.036	0.044	1	-0.253914	0.036	0.022	1	-0.400767	0.022	0.044	1	-0.531473
Ap3b1	-0.0247233	0.326	0.331	1	0.0935523	0.326	0.375	0.0173289	0.0688291	0.375	0.331	1	-0.101083	0.345	0.303	1	0.209497	0.345	0.329	1	0.108415	0.329	0.303	1	0.0190867	0.291	0.257	1	0.22992	0.291	0.247	1	0.249006	0.247	0.257	1	0.0254791	0.375	0.381	1	0.202072	0.375	0.351	1	0.227551	0.351	0.381	1	-0.0488962
Ap3b2
Ap3d1	0.100036	0.178	0.159	1	-0.645324	0.178	0.13	4.77e-41	-0.545288	0.13	0.159	8.73e-38	0.115272	0.141	0.102	1	-0.313717	0.141	0.095	2.39e-13	-0.198446	0.095	0.102	0.220952	0.104398	0.099	0.078	1	-0.241553	0.099	0.057	8.45e-28	-0.137155	0.057	0.078	1.2e-13	1.28969	0.146	0.071	1	-1.2239	0.146	0.055	0.00569095	0.0657867	0.055	0.071	1	0.21961
Ap3m1	-0.0665245	0.185	0.18	1	0.441713	0.185	0.244	1.07e-27	0.375189	0.244	0.18	6.13e-18	0.118696	0.087	0.067	1	0.0539011	0.087	0.076	1	0.172597	0.076	0.067	1	0.0611101	0.094	0.079	1	0.255974	0.094	0.077	1	0.317085	0.077	0.079	1	-0.514864	0.14	0.17	1	0.211516	0.14	0.135	1	-0.303348	0.135	0.17	1	0.367776
Ap3m2													-0.138751	0.047	0.036	1	-0.483553	0.047	0.026	0.00458925	-0.622305	0.026	0.036	1	0.363665	0.035	0.023	1	-0.290429	0.035	0.018	1.45e-05	0.0732365	0.018	0.023	1	0.51042	0.071	0.034	1	-0.103469	0.071	0.045	1	0.406951	0.045	0.034	1	-0.542019
Ap3s1	-0.118729	0.096	0.106	1	0.343834	0.096	0.125	2.43e-11	0.225105	0.125	0.106	0.0711029	-0.123061	0.144	0.126	1	0.688734	0.144	0.173	1	0.565673	0.173	0.126	0.000119971	-0.104406	0.118	0.105	1	0.673225	0.118	0.115	1	0.568819	0.115	0.105	1	-0.396148	0.116	0.139	1	0.910058	0.116	0.147	1	0.513911	0.147	0.139	1	0.180664
Ap3s2	-0.0707297	0.144	0.145	1	-0.118196	0.144	0.138	0.235248	-0.188926	0.138	0.145	0.0202172	-0.232805	0.083	0.073	1	0.0478706	0.083	0.068	0.201528	-0.184934	0.068	0.073	1	-0.0112765	0.054	0.049	1	-0.176429	0.054	0.032	1.51e-09	-0.187705	0.032	0.049	1.85e-06	0.555342	0.083	0.065	1	-0.209372	0.083	0.061	1	0.34597	0.061	0.065	1	-1.57776
Ap4b1	0.156351	0.069	0.049	6.66e-05	0.0941576	0.069	0.089	1	0.250509	0.089	0.049	9.67e-21					1.36382	0.007	0.019	1	1.84159	0.019	0.004	1					0.531096	0.009	0.015	1	2.7405	0.015	0.001	2.66e-05	-0.170466	0.009	0.01	1	1.62226	0.009	0.026	1	1.4518	0.026	0.01	1
Ap4e1	-0.053556	0.163	0.161	1	-0.0484676	0.163	0.161	1	-0.102024	0.161	0.161	0.827651	0.049416	0.147	0.116	1	0.0713494	0.147	0.13	1	0.120765	0.13	0.116	1	0.333334	0.098	0.076	1	0.134059	0.098	0.074	2.99e-05	0.467392	0.074	0.076	1	0.473509	0.122	0.099	1	0.312338	0.122	0.115	1	0.785847	0.115	0.099	1	0.0812393
Ap4m1	0.0509371	0.059	0.055	1	-0.0702003	0.059	0.066	1	-0.0192632	0.066	0.055	1	-0.37031	0.058	0.05	1	-0.0561216	0.058	0.042	0.000163996	-0.426432	0.042	0.05	0.149998	0.319452	0.057	0.04	1	-0.529557	0.057	0.032	2.5e-15	-0.210106	0.032	0.04	0.0535983	0.211387	0.039	0.051	1	0.087911	0.039	0.026	1	0.299298	0.026	0.051	1	0.657515
Ap4s1	0.143165	0.251	0.222	1	-0.455455	0.251	0.208	3.12e-17	-0.31229	0.208	0.222	0.00264715	-0.316869	0.085	0.086	1	0.161231	0.085	0.087	1	-0.155637	0.087	0.086	1	0.0756562	0.097	0.077	1	0.0575614	0.097	0.069	1.27e-09	0.133218	0.069	0.077	0.495077	0.743307	0.161	0.078	1	0.0393848	0.161	0.134	1	0.782692	0.134	0.078	1	-0.42288
Ap5b1
Ap5m1	0.0115945	0.082	0.08	1	-0.0949241	0.082	0.082	1	-0.0833296	0.082	0.08	1	0.185626	0.09	0.072	1	0.0507334	0.09	0.077	1	0.23636	0.077	0.072	1	0.167847	0.065	0.053	1	-0.227355	0.065	0.035	6.89e-14	-0.0595076	0.035	0.053	7.23e-05	-0.338348	0.077	0.092	1	0.596571	0.077	0.083	1	0.258223	0.083	0.092	1	0.239862
Ap5s1	0.293578	0.046	0.034	1	-0.974866	0.046	0.028	6.72e-05	-0.681288	0.028	0.034	0.0132148																									1.8433	0.015	0.003	1	-2.1258	0.015	0.004	1
Ap5z1	0.980215	0.057	0.028	2.46e-12	-1.09305	0.057	0.028	3.24e-49	-0.112834	0.028	0.028	2.41e-07	0.0209453	0.033	0.022	1	-0.0382135	0.033	0.022	4.88e-05	-0.0172682	0.022	0.022	1	0.198826	0.021	0.016	1	-0.319583	0.021	0.014	4.68e-06	-0.120757	0.014	0.016	0.0101067	0.351918	0.057	0.044	1	-0.261113	0.057	0.033	1	0.0908052	0.033	0.044	1	1.72753
Apaf1	0.406425	0.027	0.027	1	0.24454	0.027	0.035	1	0.650965	0.035	0.027	1	-0.110031	0.224	0.198	1	0.0519964	0.224	0.191	0.718883	-0.0580348	0.191	0.198	1	-0.0455835	0.174	0.16	1	0.153205	0.174	0.138	0.00149632	0.107621	0.138	0.16	1	-0.542561	0.185	0.197	1	0.476006	0.185	0.173	1	-0.0665543	0.173	0.197	1	-0.0649022
Apba1													-0.17001	0.437	0.401	1	-0.22461	0.437	0.338	4.69e-14	-0.39462	0.338	0.401	1.7e-12	-0.116169	0.168	0.142	1	-0.0663868	0.168	0.114	8.75e-15	-0.182556	0.114	0.142	0.00187333	0.427461	0.262	0.221	1	-0.437092	0.262	0.183	1	-0.00963177	0.183	0.221	1	-0.373006
Apba2													0.452103	0.167	0.115	1.47e-06	-0.377946	0.167	0.123	1.46e-06	0.0741572	0.123	0.115	1
Apba3	0.292877	0.099	0.074	1	-0.972005	0.099	0.063	3.4e-28	-0.679128	0.063	0.074	3.8e-11	1.06454	0.027	0.008	1	-0.862967	0.027	0.012	1.75e-09	0.201573	0.012	0.008	1	0.8513	0.017	0.01	1	-0.810897	0.017	0.007	0.000154377	0.0404023	0.007	0.01	1													4.93086
Apbb1	-0.259895	0.046	0.054	3.69e-11	0.258291	0.046	0.06	2.47e-07	-0.00160396	0.06	0.054	1	-0.358668	0.026	0.032	1	-0.553532	0.026	0.014	0.469458	-0.9122	0.014	0.032	9.23e-07	0.583608	0.014	0.007	1	-1.05021	0.014	0.004	2.48e-05					0.357024	0.027	0.024	1	-1.42935	0.027	0.006	1	-1.07233	0.006	0.024	1	3.67888
Apbb1ip													0.0143775	0.396	0.331	1	-0.0373888	0.396	0.338	0.477713	-0.0230113	0.338	0.331	1													1.03262	0.03	0.017	1	-0.730684	0.03	0.019	1	0.301934	0.019	0.017	1
Apbb2	-0.12498	0.653	0.677	5.91e-08	-0.315601	0.653	0.642	1.11e-24	-0.440581	0.642	0.677	1.54e-78	0.359597	0.362	0.239	2.61e-19	-0.157556	0.362	0.297	3.65e-19	0.202041	0.297	0.239	1	-0.142447	0.863	0.84	0.922526	0.264255	0.863	0.86	2.54e-23	0.121808	0.86	0.84	0.000420022	-0.00823564	0.589	0.558	1	0.20436	0.589	0.594	1	0.196124	0.594	0.558	1	-0.168314
Apbb3	0.87083	0.04	0.018	5.15e-05	0.00937278	0.04	0.068	0.695474	0.880203	0.068	0.018	4.64e-22	0.286833	0.023	0.013	1	0.789646	0.023	0.037	1	1.07648	0.037	0.013	1					1.29976	0.005	0.019	1	5.14146	0.019	0	1.64e-05	-0.233982	0.024	0.017	1	0.164191	0.024	0.025	1	-0.069791	0.025	0.017	1	5.91581
Apc	-0.100049	0.56	0.559	1	0.0544878	0.56	0.607	0.496191	-0.0455616	0.607	0.559	1	-0.0605037	0.274	0.24	1	0.374981	0.274	0.284	1	0.314477	0.284	0.24	1	0.0143124	0.403	0.344	1	0.336027	0.403	0.357	1	0.350339	0.357	0.344	1	-0.109267	0.443	0.425	1	0.467112	0.443	0.443	1	0.357845	0.443	0.425	1	0.0204974
Apc2	0.00597281	0.012	0.012	1	-0.822663	0.012	0.007	0.0409078	-0.81669	0.007	0.012	0.120304	0.152943	0.031	0.022	1	-0.0940154	0.031	0.022	1	0.0589275	0.022	0.022	1
Apcdd1													0.251278	0.082	0.054	0.0064354	-0.584959	0.082	0.046	6.82e-10	-0.333681	0.046	0.054	1													0.261254	0.033	0.02	1	-1.06788	0.033	0.015	1	-0.806628	0.015	0.02	1
Apcs
Apeh	0.966125	0.031	0.012	1	-1.5856	0.031	0.013	5.22e-06	-0.619471	0.013	0.012	1	0.709424	0.019	0.011	1	-1.21501	0.019	0.007	1	-0.505589	0.007	0.011	1	0.0887722	0.016	0.013	1	-0.225302	0.016	0.01	0.175315	-0.13653	0.01	0.013	0.0972286	0.539136	0.015	0.024	1	0.332915	0.015	0.015	1	0.872051	0.015	0.024	1	0.399534
Apela
Apex1
Apex2	0.202684	0.511	0.473	2.74e-07	0.589985	0.511	0.651	2.34e-132	0.792669	0.651	0.473	8.32e-224	-0.573303	0.062	0.079	1	1.06001	0.062	0.105	1	0.486708	0.105	0.079	1	0.364793	0.041	0.017	0.705731	0.552253	0.041	0.031	2.97e-13	0.917047	0.031	0.017	1	-0.393311	0.122	0.105	1	0.710991	0.122	0.134	1	0.31768	0.134	0.105	1	-0.129061
Aph1a	0.550227	0.112	0.075	9.75e-05	-0.412436	0.112	0.097	0.802203	0.137791	0.097	0.075	1	0.48274	0.016	0.009	1	0.0964367	0.016	0.014	1	0.579177	0.014	0.009	1	0.566345	0.043	0.03	1	0.167187	0.043	0.03	0.00701483	0.733532	0.03	0.03	1	-0.859188	0.024	0.034	1	1.00488	0.024	0.041	1	0.145689	0.041	0.034	1	0.229189
Aph1b	-0.245775	0.013	0.015	1	-0.029697	0.013	0.014	0.171873	-0.275472	0.014	0.015	1	-0.535962	0.012	0.012	1	0.693504	0.012	0.014	1	0.157542	0.014	0.012	1													-0.381455	0.03	0.041	1	1.24031	0.03	0.044	1	0.858852	0.044	0.041	1	-1.98218
Aph1c	1.3228	0.02	0.01	1	-0.234055	0.02	0.018	1	1.08874	0.018	0.01	1	-0.184978	0.01	0.01	1	0.325106	0.01	0.01	1	0.140129	0.01	0.01	1													0.447107	0.024	0.017	1	-0.728686	0.024	0.012	1	-0.281579	0.012	0.017	1
Api5	0.190291	0.112	0.101	1	-0.157295	0.112	0.112	1	0.032996	0.112	0.101	1	-0.0595482	0.096	0.088	1	0.0238367	0.096	0.084	1	-0.0357116	0.084	0.088	1	0.0661471	0.099	0.084	1	0.1797	0.099	0.073	0.00240616	0.245847	0.073	0.084	1	-0.186495	0.104	0.105	1	0.287553	0.104	0.082	1	0.101058	0.082	0.105	1	0.933409
Apip	-0.136683	0.101	0.098	1	-0.0313591	0.101	0.1	1	-0.168042	0.1	0.098	1	-0.421807	0.023	0.023	1	0.191533	0.023	0.022	1	-0.230274	0.022	0.023	1	0.34852	0.032	0.02	1	-0.775398	0.032	0.011	9.37e-12	-0.426877	0.011	0.02	0.00019289	0.281687	0.045	0.027	1	-1.37798	0.045	0.016	1	-1.0963	0.016	0.027	1	-1.56853
Aplf	-0.189067	0.013	0.017	1	0.366947	0.013	0.018	1	0.17788	0.018	0.017	1	-0.338176	0.021	0.023	1	0.159495	0.021	0.02	1	-0.178681	0.02	0.023	1	0.0758137	0.011	0.009	1	0.562788	0.011	0.009	1					-0.947325	0.012	0.031	1	0.117527	0.012	0.013	1	-0.829797	0.013	0.031	1	2.04174
Apln																									0.0568422	0.019	0.014	1	0.438327	0.019	0.013	1	0.495169	0.013	0.014	1
Aplnr																									-0.084162	0.173	0.167	1	0.312231	0.173	0.151	1	0.228069	0.151	0.167	1
Aplp1
Aplp2	0.0920245	0.194	0.196	1	0.325026	0.194	0.255	5.01e-45	0.417051	0.255	0.196	4.46e-34	0.0580459	0.173	0.137	0.784507	-0.339118	0.173	0.116	5.28e-11	-0.281072	0.116	0.137	1	0.0141673	0.4	0.361	1	0.337507	0.4	0.36	1	0.351675	0.36	0.361	1	-0.172608	0.583	0.578	1	0.130742	0.583	0.512	1	-0.0418654	0.512	0.578	1	-0.41123
Apmap	-0.639405	0.068	0.098	1.89e-08	0.652023	0.068	0.106	5.24e-16	0.0126178	0.106	0.098	1	-0.610956	0.019	0.019	1	0.137615	0.019	0.014	1	-0.473342	0.014	0.019	1	-0.561373	0.024	0.024	1	-0.149743	0.024	0.013	0.0101578	-0.711116	0.013	0.024	0.00400773	0.363937	0.027	0.024	1	-0.676473	0.027	0.015	1	-0.312537	0.015	0.024	1	0.542112
Apoa1
Apoa2
Apoa4
Apoa5
Apob
Apobec1													-0.0432543	0.073	0.067	1	0.281788	0.073	0.074	1	0.238534	0.074	0.067	1	0.841102	0.03	0.021	1	-1.0032	0.03	0.011	8.21e-14	-0.162096	0.011	0.021	0.0128382	-1.1971	0.06	0.112	1	0.691102	0.06	0.07	1	-0.506003	0.07	0.112	1	0.1421
Apobec2	0.0591388	0.229	0.209	1	-1.62755	0.229	0.085	4.33e-190	-1.56841	0.085	0.209	6.76e-194
Apobec3													0.183473	0.127	0.085	0.00184791	-0.0772416	0.127	0.098	6.52e-05	0.106232	0.098	0.085	1	0.15462	0.351	0.274	1.02e-07	-0.439643	0.351	0.208	7.04e-59	-0.285022	0.208	0.274	7.5e-12	-0.206384	0.223	0.221	1	-0.10546	0.223	0.172	1	-0.311844	0.172	0.221	1	0.15857
Apobec4					2.11682	0.002	0.01	0.00406899	1.6834	0.01	0.003	1
Apobr
Apoc1																																									2.01369	0.003	0.012	1	2.2218	0.012	0.003	1
Apoc2
Apoc3
Apoc4
Apod													-0.00742813	0.041	0.037	1	-0.388607	0.041	0.031	1	-0.396035	0.031	0.037	1
Apoe	1.2208	0.019	0.004	1	-6.17943	0.019	0	3.44e-18					-1.17035	0.063	0.107	1.72e-09	2.61631	0.063	0.251	1.83e-105	1.44596	0.251	0.107	3.12e-46	-0.0569654	0.063	0.071	1	0.0524128	0.063	0.043	1	-0.00455259	0.043	0.071	0.0253234	-0.564388	0.342	0.463	1	1.0035	0.342	0.463	0.00193254	0.439113	0.463	0.463	1	-1.11807
Apof
Apoh
Apol10a
Apol10b																									-0.682991	0.081	0.108	0.0389673	0.113914	0.081	0.06	0.147004	-0.569077	0.06	0.108	1.06e-21	0.684194	0.018	0.01	1	-0.532658	0.018	0.01	1	0.151536	0.01	0.01	1	-1.0113
Apol11a
Apol11b
Apol6
Apol7a
Apol7b
Apol7c
Apol7e
Apol8
Apol9a																																					-0.95775	0.006	0.01	1					-5.44416	0	0.01	1
Apol9b																																					-4.17396	0.003	0.027	1					-2.47483	0.004	0.027	1
Apold1																									0.126459	0.055	0.053	1	4.15497	0.055	0.403	0	4.28143	0.403	0.053	0	0.74804	0.033	0.01	1	0.974169	0.033	0.033	1	1.72221	0.033	0.01	1	0.709383
Apom
Apon
Apoo	-0.304514	0.345	0.389	1.23e-23	0.288295	0.345	0.417	7.97e-29	-0.0162197	0.417	0.389	1													1.82559	0.015	0.004	1	-0.557823	0.015	0.005	4.2e-07					-0.0713052	0.033	0.007	1	-1.21587	0.033	0.009	1					0.659677
Apool	-0.0963946	0.122	0.128	1	0.226906	0.122	0.151	1.04e-06	0.130512	0.151	0.128	1	0.0516364	0.066	0.056	1	0.282996	0.066	0.064	1	0.334632	0.064	0.056	1	0.0890584	0.058	0.049	1	0.318422	0.058	0.048	1	0.407481	0.048	0.049	1	-1.96048	0.048	0.095	1	1.18709	0.048	0.06	1	-0.773397	0.06	0.095	1	-0.629812
Apopt1	0.155071	0.194	0.169	1	-0.638954	0.194	0.141	2.69e-47	-0.483884	0.141	0.169	1.56e-28	0.146649	0.169	0.133	1	-0.763346	0.169	0.09	1.25e-38	-0.616697	0.09	0.133	4.12e-15	0.037844	0.164	0.132	1	-0.777908	0.164	0.071	6.49e-76	-0.740064	0.071	0.132	2e-40	-0.230111	0.134	0.156	1	0.178287	0.134	0.115	1	-0.0518241	0.115	0.156	1	0.208672
App													-0.0300204	0.552	0.495	1	0.168359	0.552	0.534	1	0.138339	0.534	0.495	1	-0.0898388	0.669	0.642	1	0.2657	0.669	0.65	3.27e-06	0.175862	0.65	0.642	0.282432	-0.202234	0.685	0.711	1	0.301123	0.685	0.662	1	0.0988894	0.662	0.711	1	-0.208407
Appbp2	0.0842928	0.272	0.255	1	-0.161808	0.272	0.265	1	-0.0775148	0.265	0.255	1	0.182224	0.256	0.188	0.000265595	0.0241449	0.256	0.216	0.373379	0.206369	0.216	0.188	1	0.0488571	0.166	0.147	1	0.372578	0.166	0.145	1	0.421436	0.145	0.147	1	-0.0668767	0.229	0.204	1	0.215559	0.229	0.191	1	0.148683	0.191	0.204	1	-0.425812
Appl1	-0.23716	0.218	0.244	3.16e-08	0.220547	0.218	0.262	2.15e-08	-0.0166135	0.262	0.244	1	0.0284884	0.24	0.19	1	-0.105061	0.24	0.19	0.000195941	-0.0765723	0.19	0.19	1	-0.108718	0.157	0.136	1	0.142474	0.157	0.116	6.77e-09	0.0337566	0.116	0.136	0.00640949	-0.714279	0.143	0.173	1	0.650207	0.143	0.147	1	-0.0640723	0.147	0.173	1	0.509693
Appl2	0.106982	0.536	0.5	0.745447	-0.153073	0.536	0.567	1	-0.0460907	0.567	0.5	1	0.913983	0.085	0.039	0.00891072	0.175274	0.085	0.085	2.16e-12	1.08926	0.085	0.039	1	1.6186	0.043	0.013	1	0.257083	0.043	0.035	1.32e-26	1.87568	0.035	0.013	7.09e-10	0.127293	0.089	0.065	1	0.565367	0.089	0.102	1	0.69266	0.102	0.065	1	0.535895
Aprt																									-0.426443	0.016	0.018	1	0.412405	0.016	0.013	1	-0.0140381	0.013	0.018	1
Aptx	0.292674	0.098	0.08	1	-0.551302	0.098	0.073	1.62e-15	-0.258628	0.073	0.08	0.000996476	-0.119024	0.031	0.024	1	0.0278383	0.031	0.025	1	-0.0911859	0.025	0.024	1	2.78464	0.01	0.002	1	-0.400191	0.01	0.005	0.000760979					-0.563792	0.039	0.048	1	-0.400711	0.039	0.022	1	-0.964502	0.022	0.048	1	1.93987
Aqp1																									-0.145258	0.381	0.378	1	1.49373	0.381	0.579	1.79e-239	1.34847	0.579	0.378	4.3e-211	0.0560958	0.095	0.071	1	0.65758	0.095	0.089	1	0.713676	0.089	0.071	1	-2.23411
Aqp11																									0.0106014	0.012	0.01	1	-0.15001	0.012	0.007	1	-0.139409	0.007	0.01	1	-1.34813	0.003	0.01	1	2.74186	0.003	0.015	1	1.39373	0.015	0.01	1	0.585313
Aqp12
Aqp2
Aqp3
Aqp4	0.877619	0.038	0.02	1.51e-10	-1.71387	0.038	0.012	2.96e-51	-0.836253	0.012	0.02	5.32e-10
Aqp5
Aqp6
Aqp7																									0.154039	0.239	0.187	0.00824378	-0.296192	0.239	0.139	2.7e-35	-0.142153	0.139	0.187	2.41e-07	0.61599	0.015	0.003	1	-1.24968	0.015	0.003	1					-0.177127
Aqp8
Aqp9
Aqr	0.0344611	0.21	0.197	1	-0.0386097	0.21	0.214	1	-0.00414864	0.214	0.197	1	-0.155142	0.113	0.102	1	0.105731	0.113	0.098	0.518329	-0.0494115	0.098	0.102	1	0.180088	0.122	0.093	1	0.11366	0.122	0.088	6.82e-09	0.293748	0.088	0.093	1	0.332413	0.155	0.133	1	-0.0419369	0.155	0.108	1	0.290476	0.108	0.133	1	0.233282
Ar													-0.43926	0.522	0.55	2.29e-06	0.35224	0.522	0.542	6.72e-05	-0.0870198	0.542	0.55	1	-0.330714	0.065	0.059	1	0.272906	0.065	0.045	0.00187411	-0.057808	0.045	0.059	0.211797	-1.7213	0.048	0.092	1	1.20283	0.048	0.041	1	-0.518477	0.041	0.092	1	1.25942
Araf	0.340026	0.251	0.209	0.0190054	-0.590474	0.251	0.214	8.3e-20	-0.250448	0.214	0.209	0.00972378	-0.0995695	0.134	0.113	1	0.352681	0.134	0.139	1	0.253111	0.139	0.113	1	0.606974	0.066	0.043	1	0.0646266	0.066	0.052	3.66e-07	0.671601	0.052	0.043	1	0.0596339	0.161	0.133	1	0.315323	0.161	0.144	1	0.374957	0.144	0.133	1	1.84823
Arap1	0.488774	0.016	0.02	1	0.0405535	0.016	0.021	1	0.529328	0.021	0.02	1	0.350506	0.101	0.066	0.0102815	-0.328976	0.101	0.074	1.48e-06	0.0215301	0.074	0.066	1	0.271431	0.019	0.012	1	0.0235112	0.019	0.013	0.0982676	0.294942	0.013	0.012	1	-0.554707	0.045	0.048	1	1.42617	0.045	0.047	1	0.871461	0.047	0.048	1	-0.843147
Arap2	-0.463944	0.325	0.385	2.67e-40	0.42317	0.325	0.41	1.59e-49	-0.0407738	0.41	0.385	1	-0.227488	0.032	0.025	1	1.2157	0.032	0.046	1	0.988213	0.046	0.025	1	-0.384401	0.181	0.19	1	0.882235	0.181	0.199	0.172007	0.497833	0.199	0.19	1	3.0005	0.036	0.003	1	-2.23964	0.036	0.003	1					-0.0775466
Arap3																									-0.0894411	0.495	0.449	1	-0.042603	0.495	0.388	4.34e-07	-0.132044	0.388	0.449	0.0152707	0.187133	0.399	0.33	1	-0.25928	0.399	0.291	1	-0.0721466	0.291	0.33	1	0.0966507
Arc
Arcn1	-0.019002	0.183	0.179	1	0.30609	0.183	0.233	6.2e-05	0.287088	0.233	0.179	4.88e-08	-0.245913	0.255	0.246	1	0.406813	0.255	0.278	1	0.1609	0.278	0.246	1	-0.0677122	0.123	0.117	1	0.333183	0.123	0.104	0.00968741	0.265471	0.104	0.117	1	-0.137832	0.202	0.214	1	-0.464444	0.202	0.122	1	-0.602276	0.122	0.214	1	-0.0664955
Areg
Arel1	0.115156	0.258	0.232	1	-0.140194	0.258	0.246	1	-0.0250386	0.246	0.232	1	0.289993	0.103	0.068	0.213872	-0.592752	0.103	0.061	1.27e-15	-0.302759	0.061	0.068	1	0.190429	0.096	0.077	1	-0.35052	0.096	0.054	2.31e-21	-0.16009	0.054	0.077	5.9e-09	0.813788	0.128	0.088	1	-1.38867	0.128	0.049	0.0224929	-0.57488	0.049	0.088	1	-0.380375
Arf1	0.181246	0.121	0.108	1	-0.749908	0.121	0.079	5.7e-11	-0.568662	0.079	0.108	2.16e-06	-0.210703	0.141	0.136	1	0.228067	0.141	0.137	1	0.0173642	0.137	0.136	1	0.0641284	0.156	0.133	1	0.340276	0.156	0.123	1	0.404405	0.123	0.133	1	-0.390931	0.149	0.15	1	0.189956	0.149	0.102	1	-0.200975	0.102	0.15	1	0.161571
Arf2	0.141433	0.036	0.031	1	-0.00707824	0.036	0.038	1	0.134354	0.038	0.031	1	-0.758917	0.023	0.025	1	0.388568	0.023	0.021	1	-0.370349	0.021	0.025	1	0.290738	0.038	0.03	1	0.109783	0.038	0.027	1	0.400522	0.027	0.03	1	-0.258147	0.065	0.048	1	-0.0341658	0.065	0.042	1	-0.292313	0.042	0.048	1	0.448909
Arf3	0.296677	0.088	0.067	0.00838253	-0.392687	0.088	0.066	2.92e-14	-0.0960101	0.066	0.067	1	-0.0316707	0.088	0.074	1	-0.252308	0.088	0.06	2.65e-08	-0.283978	0.06	0.074	0.105175	0.197033	0.078	0.061	1	-0.0831478	0.078	0.048	2.76e-14	0.113885	0.048	0.061	0.000888706	0.195083	0.08	0.088	1	0.0309135	0.08	0.073	1	0.225997	0.073	0.088	1	0.607082
Arf4	0.384026	0.209	0.171	4.77e-06	0.0805155	0.209	0.238	0.000351282	0.464542	0.238	0.171	2.49e-32	-0.132243	0.275	0.251	1	0.68372	0.275	0.334	3.26e-10	0.551477	0.334	0.251	1.49e-12	0.285388	0.119	0.093	1	0.947662	0.119	0.148	0.00618553	1.23305	0.148	0.093	1.55e-12	-0.192107	0.176	0.17	1	0.291129	0.176	0.138	1	0.0990224	0.138	0.17	1	0.25005
Arf5	1.88063	0.016	0.002	1	-3.66194	0.016	0	1					-0.0757956	0.063	0.054	1	0.113569	0.063	0.056	1	0.0377734	0.056	0.054	1	0.0121304	0.098	0.089	1	0.170585	0.098	0.066	1.54e-05	0.182716	0.066	0.089	0.177682	-0.338878	0.045	0.065	1	0.38736	0.045	0.057	1	0.0484823	0.057	0.065	1	-0.971246
Arf6																									0.273716	0.031	0.024	1	0.201562	0.031	0.019	1	0.475278	0.019	0.024	1					1.54462	0.003	0.01	1	1.97096	0.01	0.003	1	-0.880725
Arfgap1	0.265469	0.138	0.116	1	-0.77399	0.138	0.095	6.92e-33	-0.508521	0.095	0.116	2.12e-21	-0.253317	0.198	0.193	1	-0.088144	0.198	0.162	0.00163873	-0.341461	0.162	0.193	0.00262164	-0.244429	0.078	0.075	1	-0.00631988	0.078	0.053	7.04e-11	-0.250749	0.053	0.075	2.17e-08	-0.319847	0.128	0.136	1	-0.1702	0.128	0.092	1	-0.490047	0.092	0.136	1	-0.0995206
Arfgap2	0.39472	0.107	0.076	1	-0.915604	0.107	0.069	1.59e-45	-0.520884	0.069	0.076	6.61e-31	0.564537	0.054	0.029	1	-0.325103	0.054	0.034	2.21e-09	0.239434	0.034	0.029	1	0.207104	0.037	0.029	1	0.296622	0.037	0.03	8.46e-05	0.503726	0.03	0.029	0.227527	1.06932	0.074	0.037	1	-0.664275	0.074	0.041	1	0.405046	0.041	0.037	1	-0.322201
Arfgap3	0.690606	0.022	0.019	1	-0.290611	0.022	0.021	4e-05	0.399995	0.021	0.019	1.28e-06	-0.132006	0.205	0.187	1	-0.406248	0.205	0.141	9.3e-13	-0.538254	0.141	0.187	3.35e-09	0.438047	0.051	0.037	1	-0.242705	0.051	0.031	3.91e-08	0.195341	0.031	0.037	1	0.018421	0.098	0.092	1	-0.751846	0.098	0.054	1	-0.733425	0.054	0.092	1	1.37952
Arfgef1	-0.237203	0.544	0.573	2.57e-19	0.193778	0.544	0.611	5.39e-26	-0.043425	0.611	0.573	1	-0.0266263	0.366	0.304	1	0.336423	0.366	0.371	1	0.309796	0.371	0.304	0.00422779	0.0323778	0.321	0.283	1	0.422574	0.321	0.307	1	0.454952	0.307	0.283	1	-0.102419	0.452	0.398	1	0.309828	0.452	0.403	1	0.207409	0.403	0.398	1	-0.0168582
Arfgef2	-0.056904	0.543	0.538	1	-0.176581	0.543	0.553	0.237401	-0.233485	0.553	0.538	1.98e-08	0.247145	0.162	0.11	0.488523	-0.107697	0.162	0.144	9.9e-10	0.139447	0.144	0.11	1	0.204223	0.122	0.087	1	0.0472455	0.122	0.094	6.74e-24	0.251468	0.094	0.087	4.45e-10	0.111094	0.158	0.153	1	-0.242469	0.158	0.132	1	-0.131374	0.132	0.153	1	0.622359
Arfgef3													-1.63611	0.004	0.011	1					-0.372953	0.009	0.011	1
Arfip1	0.323085	0.017	0.014	1	-1.37982	0.017	0.008	1	-1.05673	0.008	0.014	1	-0.146658	0.018	0.013	1	-0.0427602	0.018	0.014	1	-0.189418	0.014	0.013	1	1.01343	0.011	0.005	1	0.392733	0.011	0.009	1																	-1.35777
Arfip2	0.88282	0.095	0.056	1.88e-10	-0.854234	0.095	0.064	5.67e-76	0.0285853	0.064	0.056	4.16e-25	0.0849816	0.102	0.073	1	-0.378411	0.102	0.066	3.96e-21	-0.293429	0.066	0.073	0.000316922	0.620863	0.026	0.016	1	-0.0339011	0.026	0.021	4.74e-17	0.586962	0.021	0.016	0.00162889	0.804439	0.065	0.034	1	-1.74445	0.065	0.02	1	-0.940009	0.02	0.034	1	-0.33274
Arfrp1	0.354652	0.118	0.095	1	-0.76147	0.118	0.081	1.39e-23	-0.406818	0.081	0.095	3.74e-22	0.859388	0.045	0.021	1	-0.275934	0.045	0.029	5.89e-07	0.583454	0.029	0.021	1	0.0228093	0.034	0.033	1	0.205839	0.034	0.028	0.179584	0.228648	0.028	0.033	0.0013468	-0.495266	0.048	0.051	1	-0.406353	0.048	0.02	1	-0.901619	0.02	0.051	1	1.10445
Arg1
Arg2
Arglu1	0.806739	0.253	0.149	2.48e-44	-0.394702	0.253	0.257	1	0.412036	0.257	0.149	2.06e-24	0.334112	0.391	0.274	8.03e-15	0.14062	0.391	0.372	1	0.474733	0.372	0.274	1e-08	0.12267	0.476	0.409	0.0317997	0.269036	0.476	0.437	1	0.391705	0.437	0.409	0.00818191	0.16465	0.488	0.401	1	0.352793	0.488	0.477	1	0.517442	0.477	0.401	1	-0.147401
Arhgap1	0.298563	0.052	0.047	1	-0.259703	0.052	0.054	1	0.0388599	0.054	0.047	1	-0.072695	0.065	0.058	1	-0.0121271	0.065	0.055	1	-0.084822	0.055	0.058	1	0.127055	0.07	0.059	1	0.0726872	0.07	0.05	0.000121313	0.199742	0.05	0.059	1	0.911846	0.125	0.048	1	-0.795934	0.125	0.048	1	0.115912	0.048	0.048	1	0.906964
Arhgap10	-0.255146	0.715	0.757	3.26e-36	-0.10544	0.715	0.753	1	-0.360586	0.753	0.757	4.57e-70	0.303852	0.509	0.379	2.43e-17	-0.391698	0.509	0.391	5.69e-40	-0.0878451	0.391	0.379	1	0.812566	0.089	0.04	0.0105948	0.0205406	0.089	0.063	1.7e-65	0.833107	0.063	0.04	3.28e-28	0.911173	0.098	0.041	1	0.0845492	0.098	0.073	1	0.995723	0.073	0.041	1	-0.115781
Arhgap11a
Arhgap12	-0.178256	0.435	0.46	2.69e-12	0.39889	0.435	0.54	7.78e-72	0.220634	0.54	0.46	3.6e-18	-0.0396964	0.354	0.302	1	0.250053	0.354	0.349	1	0.210357	0.349	0.302	1	0.0303389	0.226	0.193	1	0.26475	0.226	0.186	0.704031	0.295089	0.186	0.193	1	-0.239128	0.354	0.33	1	0.648945	0.354	0.33	1	0.409816	0.33	0.33	1	0.673872
Arhgap15													0.114562	0.016	0.014	1	0.643347	0.016	0.021	1	0.757909	0.021	0.014	1													-0.9088	0.006	0.014	1					-3.1225	0.001	0.014	1
Arhgap17	-0.00131807	0.153	0.149	1	-0.23056	0.153	0.146	0.0284124	-0.231878	0.146	0.149	2.38e-11	0.0159281	0.225	0.178	1	-0.0187864	0.225	0.196	0.0659129	-0.00285829	0.196	0.178	1	0.0621321	0.324	0.267	0.681589	0.0142459	0.324	0.24	2.98e-12	0.076378	0.24	0.267	1	0.514684	0.304	0.197	1	-0.252842	0.304	0.198	1	0.261842	0.198	0.197	1	0.00102192
Arhgap18	0.797568	0.129	0.076	1.35e-14	-0.640021	0.129	0.095	1.44e-06	0.157547	0.095	0.076	1	-0.187925	0.146	0.136	1	0.676205	0.146	0.18	1	0.48828	0.18	0.136	0.582489	-0.284651	0.597	0.603	0.00243476	0.476776	0.597	0.612	8.39e-19	0.192125	0.612	0.603	1	0.309705	0.283	0.207	1	0.220697	0.283	0.243	1	0.530402	0.243	0.207	1	0.0170009
Arhgap19	-0.218969	0.013	0.017	1	0.286212	0.013	0.018	1	0.0672429	0.018	0.017	1
Arhgap20	-0.0241073	0.429	0.423	1	-0.445492	0.429	0.365	1.54e-48	-0.469599	0.365	0.423	2.65e-51	0.603259	0.016	0.011	1	0.291301	0.016	0.018	3.53e-05	0.89456	0.018	0.011	0.161778													0.640442	0.015	0.003	1	-5.0462	0.015	0	0.507293					5.03307
Arhgap21	0.102993	0.762	0.739	0.0241419	-0.138843	0.762	0.793	0.000970884	-0.0358499	0.793	0.739	1	-0.00382362	0.644	0.585	1	0.0128521	0.644	0.606	1	0.00902849	0.606	0.585	1	0.595375	0.153	0.082	0.000995024	-0.102862	0.153	0.104	1.19e-46	0.492513	0.104	0.082	2.76e-15	0.0741209	0.182	0.156	1	-0.0188612	0.182	0.144	1	0.0552596	0.144	0.156	1	0.438221
Arhgap22													0.313155	0.14	0.097	3.75e-05	-1.07226	0.14	0.065	1.14e-39	-0.759108	0.065	0.097	5.56e-07													-0.810243	0.033	0.034	1	0.0803404	0.033	0.02	1	-0.729902	0.02	0.034	1
Arhgap23	-0.149526	0.153	0.163	1	-0.366862	0.153	0.142	3.19e-12	-0.516389	0.142	0.163	8.09e-23	0.193406	0.277	0.203	5.97e-06	-0.593107	0.277	0.171	1.37e-37	-0.399701	0.171	0.203	1.26e-05	0.0721814	0.341	0.291	1	-0.433118	0.341	0.213	1.19e-52	-0.360936	0.213	0.291	1.14e-23	-0.0265874	0.366	0.327	1	-0.380254	0.366	0.246	0.911496	-0.406842	0.246	0.327	1	-0.0761515
Arhgap24	-0.207634	0.134	0.167	1	0.0769402	0.134	0.164	1	-0.130694	0.164	0.167	1.04e-10	0.109227	0.762	0.677	0.00206134	0.280006	0.762	0.749	0.000790728	0.389233	0.749	0.677	3.57e-24																									-0.357346
Arhgap25																									0.0759187	0.094	0.075	1	0.170298	0.094	0.065	0.00308623	0.246216	0.065	0.075	1	-0.609917	0.015	0.024	1	-1.00733	0.015	0.007	1	-1.61725	0.007	0.024	1	-0.110613
Arhgap26	0.049863	0.913	0.923	0.0698973	0.0615134	0.913	0.958	0.354849	0.111376	0.958	0.923	1.1e-18	3.09563	0.036	0.004	3.92e-19	-2.36414	0.036	0.005	1e-137					0.0434389	0.424	0.357	0.0308299	0.252459	0.424	0.395	0.00748088	0.295898	0.395	0.357	1	0.125894	0.188	0.119	1	1.13981	0.188	0.306	1	1.2657	0.306	0.119	1	0.0919975
Arhgap27																									0.0944602	0.255	0.206	0.368539	-0.415946	0.255	0.142	5.24e-47	-0.321485	0.142	0.206	5.43e-17	0.559566	0.048	0.027	1	0.218699	0.048	0.036	1	0.778265	0.036	0.027	1	-0.475504
Arhgap28													-0.105891	0.244	0.205	1	0.265394	0.244	0.222	1	0.159503	0.222	0.205	1	-0.105173	0.3	0.277	1	0.0592527	0.3	0.227	3.82e-07	-0.0459199	0.227	0.277	0.00942599	-0.31716	0.268	0.259	1	-0.240748	0.268	0.156	1	-0.557908	0.156	0.259	1	-0.367982
Arhgap29	-0.272714	0.629	0.672	1.76e-37	-0.365918	0.629	0.597	9.63e-29	-0.638632	0.597	0.672	3.19e-157	0.995013	0.087	0.043	1	0.457796	0.087	0.098	0.000349626	1.45281	0.098	0.043	1	-0.0979417	0.555	0.518	1	0.491971	0.555	0.567	1.33e-18	0.394029	0.567	0.518	6.65e-13	-0.757515	0.411	0.51	1	0.75641	0.411	0.493	1	-0.00110512	0.493	0.51	1	0.102906
Arhgap30
Arhgap31													0.147124	0.197	0.157	0.346426	-0.0212563	0.197	0.172	0.000698941	0.125867	0.172	0.157	1	0.00496252	0.849	0.807	1	0.0679792	0.849	0.806	1	0.0729417	0.806	0.807	1	0.168791	0.86	0.786	1	0.221632	0.86	0.812	1	0.390424	0.812	0.786	1	-0.154179
Arhgap32	-0.0687988	0.278	0.287	0.380148	0.393029	0.278	0.353	4.18e-33	0.324231	0.353	0.287	1.59e-12	-0.159529	0.449	0.415	1	0.408741	0.449	0.478	3.34e-06	0.249212	0.478	0.415	0.000368206	0.436193	0.057	0.038	1	0.500066	0.057	0.051	1	0.936259	0.051	0.038	1	-0.173468	0.271	0.259	1	0.578636	0.271	0.277	1	0.405168	0.277	0.259	1	-0.017251
Arhgap33
Arhgap33os
Arhgap35	-0.11325	0.532	0.539	0.000637848	0.14206	0.532	0.592	2.78e-13	0.0288107	0.592	0.539	1	0.0832761	0.359	0.286	0.0551477	0.0216438	0.359	0.327	1	0.10492	0.327	0.286	1	0.181342	0.197	0.152	1	0.157933	0.197	0.158	8.94e-07	0.339275	0.158	0.152	1	-0.344794	0.217	0.265	1	0.552346	0.217	0.231	1	0.207551	0.231	0.265	1	-0.0686386
Arhgap36
Arhgap39	-0.0868641	0.174	0.173	1	-0.351976	0.174	0.149	1.58e-17	-0.43884	0.149	0.173	5.06e-21	-0.0252598	0.073	0.062	1	-0.0746754	0.073	0.058	0.00445452	-0.0999352	0.058	0.062	1	1.57544	0.019	0.007	1	-0.258661	0.019	0.014	5.35e-09	1.31678	0.014	0.007	1	-0.591688	0.048	0.071	1	0.0348802	0.048	0.042	1	-0.556808	0.042	0.071	1	1.49631
Arhgap4	-0.409883	0.008	0.01	1	1.00675	0.008	0.017	1	0.596862	0.017	0.01	1																									-1.70633	0.006	0.01	1					-0.186695	0.009	0.01	1	4.47453
Arhgap40
Arhgap42	-0.309675	0.318	0.366	1.78e-12	0.433669	0.318	0.415	2.31e-40	0.123994	0.415	0.366	0.0113003	-0.00732817	0.472	0.417	1	0.142894	0.472	0.447	1	0.135566	0.447	0.417	1													0.0118309	0.101	0.085	1	1.21671	0.101	0.157	1	1.22854	0.157	0.085	1
Arhgap44	-0.294904	0.362	0.398	1.14e-15	-0.0972403	0.362	0.356	1	-0.392145	0.356	0.398	3.6e-36	0.501556	0.052	0.029	1	-0.0236557	0.052	0.041	7.79e-05	0.477901	0.041	0.029	1													0.351652	0.128	0.092	1	-0.584355	0.128	0.061	1	-0.232703	0.061	0.092	1	-0.571867
Arhgap45
Arhgap5	-0.0289961	0.533	0.532	1	0.179514	0.533	0.588	4.45e-18	0.150518	0.588	0.532	2.2e-11	0.168836	0.253	0.194	0.000222662	0.223031	0.253	0.237	1	0.391867	0.237	0.194	1	0.0493906	0.299	0.255	1	0.227189	0.299	0.238	0.000607589	0.27658	0.238	0.255	1	-0.104268	0.301	0.306	1	0.410529	0.301	0.282	1	0.306261	0.282	0.306	1	0.349487
Arhgap6	-0.0289498	0.565	0.529	1	0.289992	0.565	0.609	5.29e-14	0.261042	0.609	0.529	1.18e-22	-0.287023	0.698	0.684	0.0170537	0.833363	0.698	0.785	1.31e-107	0.546339	0.785	0.684	7.83e-57	1.28401	0.02	0.01	0.0154664	0.33858	0.02	0.018	1.91e-39	1.62259	0.018	0.01	1.63e-09	-0.550742	0.196	0.224	1	0.621304	0.196	0.195	1	0.0705625	0.195	0.224	1	3.13257
Arhgap8																									0.0315267	0.033	0.025	1	0.0805792	0.033	0.023	1	0.112106	0.023	0.025	1	-0.142372	0.054	0.054	1	0.292026	0.054	0.051	1	0.149654	0.051	0.054	1	0.214224
Arhgap9	-0.205786	0.027	0.02	1	-1.11675	0.027	0.015	5.36e-05	-1.32253	0.015	0.02	0.00100579
Arhgdia													-0.0157857	0.05	0.042	1	0.295199	0.05	0.049	1	0.279413	0.049	0.042	1	-0.110222	0.106	0.105	1	0.220161	0.106	0.077	0.00857646	0.109939	0.077	0.105	0.0146568	0.162735	0.068	0.075	1	0.0064169	0.068	0.039	1	0.169152	0.039	0.075	1	0.136631
Arhgdib													-0.313491	0.023	0.022	1	0.375963	0.023	0.023	1	0.0624718	0.023	0.022	1	-0.82819	0.014	0.02	1	0.244765	0.014	0.009	1	-0.583426	0.009	0.02	0.952115	0.478379	0.08	0.065	1	0.768017	0.08	0.099	1	1.2464	0.099	0.065	1	-0.0531184
Arhgdig
Arhgef1	0.377548	0.189	0.148	5.23e-06	-0.674896	0.189	0.154	7.96e-57	-0.297348	0.154	0.148	5.92e-20	0.0532061	0.258	0.201	0.299	-0.551107	0.258	0.162	1.15e-42	-0.497901	0.162	0.201	2.66e-16	0.0735254	0.215	0.169	0.011249	-0.302756	0.215	0.13	1.36e-46	-0.22923	0.13	0.169	6.29e-14	0.532221	0.289	0.207	1	-0.499025	0.289	0.188	1	0.0331961	0.188	0.207	1	-0.167864
Arhgef10	-0.113392	0.29	0.299	1	-0.445305	0.29	0.244	3.32e-34	-0.558697	0.244	0.299	1.19e-50	0.161341	0.222	0.161	0.000581158	-0.617227	0.222	0.13	5.18e-40	-0.455886	0.13	0.161	1.19e-09	-0.0883068	0.207	0.194	1	-0.167049	0.207	0.14	4.69e-24	-0.255356	0.14	0.194	2.27e-21	0.208709	0.271	0.218	1	-0.203226	0.271	0.175	1	0.00548272	0.175	0.218	1	-0.470925
Arhgef10l	-0.317107	0.392	0.437	1.02e-22	-0.358551	0.392	0.35	6.73e-30	-0.675658	0.35	0.437	2.59e-121	0.333825	0.217	0.144	4.73e-05	-0.499661	0.217	0.138	1.57e-32	-0.165836	0.138	0.144	3.8e-05	8.10071	0.016	0	1	0.922337	0.016	0.014	9.19e-11	9.02305	0.014	0	0.00659597	0.797378	0.062	0.031	1	-0.788062	0.062	0.019	1	0.0093157	0.019	0.031	0.348999	1.35411
Arhgef11	-0.0562138	0.354	0.357	1	-0.115152	0.354	0.358	1	-0.171366	0.358	0.357	0.000100857	0.114117	0.356	0.283	0.000674483	-0.189671	0.356	0.285	6.92e-14	-0.0755543	0.285	0.283	1	0.0241613	0.251	0.208	1	-0.124835	0.251	0.169	4.36e-31	-0.100674	0.169	0.208	5.77e-13	-0.550842	0.307	0.34	1	0.227654	0.307	0.263	1	-0.323188	0.263	0.34	1	0.0936099
Arhgef12	0.029312	0.736	0.728	1	0.241881	0.736	0.82	3.17e-65	0.271193	0.82	0.728	2.55e-72	0.0348901	0.653	0.571	1	0.10086	0.653	0.638	1	0.13575	0.638	0.571	1	-0.209179	0.625	0.613	1	0.388532	0.625	0.62	1.3e-10	0.179352	0.62	0.613	1	0.0321983	0.598	0.571	1	0.373101	0.598	0.635	1	0.405299	0.635	0.571	1	0.133644
Arhgef15																									0.041235	0.571	0.511	1	-0.222128	0.571	0.423	1.14e-25	-0.180893	0.423	0.511	1.54e-09	0.635161	0.31	0.201	1	-0.535241	0.31	0.205	1	0.0999194	0.205	0.201	1	-0.31785
Arhgef16
Arhgef17	-0.0970012	0.168	0.171	1	-0.791237	0.168	0.111	1.46e-58	-0.888239	0.111	0.171	5.71e-79	0.0680527	0.145	0.107	0.462112	-0.470569	0.145	0.091	4.62e-22	-0.402516	0.091	0.107	0.000414121													0.655597	0.024	0.02	1	-1.61156	0.024	0.01	1	-0.955958	0.01	0.02	1	2.11623
Arhgef18	-0.0454961	0.202	0.19	1	-0.271348	0.202	0.188	5.37e-07	-0.316844	0.188	0.19	0.022996	0.0506497	0.162	0.125	0.891741	-0.541562	0.162	0.097	4.1e-26	-0.490912	0.097	0.125	1.47e-06	-0.0329346	0.106	0.1	1	-0.215553	0.106	0.068	8.91e-18	-0.248488	0.068	0.1	4.65e-12	0.554531	0.155	0.116	1	-0.469783	0.155	0.093	1	0.0847481	0.093	0.116	1	0.0746021
Arhgef19	-0.866458	0.126	0.203	1.31e-82	-0.339926	0.126	0.112	0.0329699	-1.20638	0.112	0.203	1.15e-148	0.311425	0.038	0.021	1	-0.842627	0.038	0.018	2.77e-11	-0.531202	0.018	0.021	8.59e-07
Arhgef2	0.624932	0.022	0.021	1	-0.481693	0.022	0.028	1	0.143239	0.028	0.021	1.3e-06	-0.174199	0.273	0.245	1	-0.00273865	0.273	0.218	6.51e-05	-0.176938	0.218	0.245	0.255574	0.269415	0.339	0.26	1.14e-06	-0.206368	0.339	0.221	1.92e-31	0.0630471	0.221	0.26	0.0238255	-0.311522	0.232	0.235	1	0.00965051	0.232	0.164	1	-0.301871	0.164	0.235	1	0.205636
Arhgef25													0.124945	0.166	0.128	0.464059	-0.39902	0.166	0.11	3.73e-16	-0.274076	0.11	0.128	0.422756	0.120199	0.036	0.027	1	-0.282681	0.036	0.02	3.92e-13	-0.162483	0.02	0.027	0.00126016	-0.521143	0.054	0.065	1	-0.472308	0.054	0.025	1	-0.993451	0.025	0.065	1	-1.76615
Arhgef26													0.0339673	0.014	0.011	1	0.276156	0.014	0.013	1	0.310124	0.013	0.011	1	-0.137781	0.078	0.079	1	0.429499	0.078	0.071	1	0.291718	0.071	0.079	1	-1.09814	0.009	0.017	1	0.848279	0.009	0.012	1	-0.249864	0.012	0.017	1	-0.00201634
Arhgef28	-0.205241	0.06	0.067	1	0.210381	0.06	0.073	1	0.00513953	0.073	0.067	1	0.126774	0.163	0.123	0.0906137	-0.368299	0.163	0.109	1.31e-14	-0.241525	0.109	0.123	1	0.509285	0.323	0.216	2.18e-23	-0.273252	0.323	0.201	2.43e-40	0.236033	0.201	0.216	1	-0.409168	0.253	0.299	1	0.282973	0.253	0.221	1	-0.126195	0.221	0.299	1	0.0397911
Arhgef3	0.358405	0.501	0.418	1.3e-26	-0.130569	0.501	0.511	1	0.227836	0.511	0.418	3.36e-14	0.140966	0.51	0.421	5.02e-05	-0.543987	0.51	0.36	8.19e-60	-0.40302	0.36	0.421	4.83e-19	-0.229375	0.646	0.633	0.716975	0.261378	0.646	0.6	1	0.0320032	0.6	0.633	1	0.0617462	0.583	0.602	1	0.157519	0.583	0.594	1	0.219265	0.594	0.602	1	-0.00943935
Arhgef33	0.102458	0.034	0.032	1	0.207666	0.034	0.036	1	0.310123	0.036	0.032	1																																					3.81544
Arhgef37	-0.259498	0.142	0.167	4.99e-06	-0.0658754	0.142	0.153	1	-0.325373	0.153	0.167	1.39e-07													0.982653	0.028	0.016	1	-0.497523	0.028	0.017	0.00192287	0.48513	0.017	0.016	1													1.43997
Arhgef38
Arhgef39
Arhgef4					0.529115	0.007	0.013	1	0.944418	0.013	0.007	1																																					3.86526
Arhgef4					0.529115	0.007	0.013	1	0.944418	0.013	0.007	1																																					3.86526
Arhgef40	-0.322723	0.019	0.026	1	-0.313381	0.019	0.021	5.77e-18	-0.636104	0.021	0.026	3.38e-29	0.259925	0.429	0.324	5.34e-11	-0.718673	0.429	0.259	1.43e-70	-0.458749	0.259	0.324	9.77e-15	0.22002	0.081	0.064	1	-0.485145	0.081	0.042	4.95e-35	-0.265125	0.042	0.064	4.54e-13	-0.394693	0.128	0.163	1	-0.255701	0.128	0.089	1	-0.650394	0.089	0.163	1	0.143027
Arhgef5	0.166128	0.07	0.057	1	-0.822781	0.07	0.042	9.8e-22	-0.656653	0.042	0.057	9.02e-18	4.51085	0.018	0.001	0.242468	-0.021904	0.018	0.013	1	4.48895	0.013	0.001	1	0.366774	0.128	0.088	0.000764165	-0.829741	0.128	0.052	1.43e-58	-0.462967	0.052	0.088	4.61e-17	-0.154208	0.11	0.088	1	-0.274018	0.11	0.067	1	-0.428226	0.067	0.088	1	0.130588
Arhgef6	0.0246614	0.382	0.365	1	0.0206849	0.382	0.393	1	0.0453462	0.393	0.365	1	0.23904	0.159	0.115	0.00522006	0.417264	0.159	0.168	1	0.656304	0.168	0.115	1	0.328986	0.106	0.073	1	0.449598	0.106	0.089	0.00135029	0.778584	0.089	0.073	1	0.336521	0.06	0.041	1	0.515	0.06	0.064	1	0.851522	0.064	0.041	1	0.586063
Arhgef7	-0.0685359	0.445	0.436	1	-0.27747	0.445	0.411	1.6e-18	-0.346006	0.411	0.436	1.48e-31	0.604372	0.073	0.039	1	0.152038	0.073	0.072	2.98e-06	0.75641	0.072	0.039	1	-0.029645	0.259	0.232	1	0.0358714	0.259	0.202	6.4e-13	0.00622632	0.202	0.232	4.24e-08	1.13497	0.155	0.051	1	-0.471289	0.155	0.09	1	0.663685	0.09	0.051	1	-0.212314
Arhgef9	-0.388301	0.236	0.284	7.98e-26	0.45504	0.236	0.31	2.41e-37	0.0667389	0.31	0.284	1	0.480045	0.047	0.027	1	0.296508	0.047	0.048	1	0.776553	0.048	0.027	1	0.508783	0.074	0.044	1	0.0197826	0.074	0.049	5.64e-06	0.528565	0.049	0.044	1	0.00990557	0.092	0.071	1	0.0364247	0.092	0.066	1	0.0463303	0.066	0.071	1	1.3404
Arid1a	0.311489	0.444	0.364	1.71e-25	-0.327479	0.444	0.408	8.42e-24	-0.0159899	0.408	0.364	1	0.128423	0.358	0.281	4.4e-05	-0.211267	0.358	0.276	8.36e-17	-0.082844	0.276	0.281	1	-0.0269217	0.32	0.286	1	0.0165201	0.32	0.242	3.33e-17	-0.0104016	0.242	0.286	3.27e-06	0.0124471	0.408	0.388	1	-0.305995	0.408	0.298	1	-0.293548	0.298	0.388	1	0.0368912
Arid1b	-0.250617	0.695	0.742	1.11e-40	-0.209578	0.695	0.705	2.47e-13	-0.460195	0.705	0.742	3.12e-127	-0.107119	0.63	0.569	1	-0.0257293	0.63	0.589	1	-0.132849	0.589	0.569	1	0.0989527	0.536	0.461	0.0670736	-0.0245396	0.536	0.446	5.5e-09	0.0744131	0.446	0.461	1	-0.242454	0.664	0.701	1	0.0156318	0.664	0.6	1	-0.226822	0.6	0.701	1	0.100694
Arid2	-0.0369984	0.562	0.552	1	0.0166332	0.562	0.607	1	-0.0203652	0.607	0.552	1	-0.015166	0.341	0.288	1	-0.0146298	0.341	0.297	9.79e-06	-0.0297959	0.297	0.288	1	0.0640765	0.388	0.334	1	0.00532659	0.388	0.297	2.75e-12	0.0694031	0.297	0.334	0.0967229	0.530336	0.494	0.378	1	-0.386187	0.494	0.358	1	0.144148	0.358	0.378	1	0.177917
Arid3a	0.23006	0.013	0.008	1	-0.886673	0.013	0.005	4.32e-11					-0.277466	0.013	0.011	1	0.177118	0.013	0.009	1	-0.100348	0.009	0.011	1	0.330367	0.028	0.022	1	-0.694845	0.028	0.012	3.46e-07	-0.364478	0.012	0.022	0.00928082													1.15598
Arid3b	-0.113262	0.082	0.085	1	-0.246423	0.082	0.07	5.06e-07	-0.359685	0.07	0.085	4.94e-12	-0.0744456	0.024	0.02	1	0.304145	0.024	0.025	1	0.229699	0.025	0.02	1	-0.856222	0.01	0.011	1	1.06783	0.01	0.012	1	0.211608	0.012	0.011	1	-0.865281	0.054	0.051	1	0.6289	0.054	0.035	1	-0.23638	0.035	0.051	1	-0.207382
Arid3c
Arid4a	0.102086	0.232	0.211	1	-0.321767	0.232	0.205	1.06e-15	-0.219682	0.205	0.211	2.43e-05	0.0518678	0.242	0.196	0.698055	-0.131105	0.242	0.188	8.06e-11	-0.0792374	0.188	0.196	1	0.186103	0.205	0.168	0.259436	-0.0605908	0.205	0.142	1.96e-22	0.125513	0.142	0.168	0.0030765	0.220204	0.253	0.207	1	-0.143338	0.253	0.167	1	0.0768662	0.167	0.207	1	0.145891
Arid4b	0.207582	0.44	0.397	0.000371729	-0.139114	0.44	0.443	1	0.0684682	0.443	0.397	1	0.0405901	0.35	0.283	0.00444537	0.0761025	0.35	0.317	1	0.116693	0.317	0.283	1	-0.0253922	0.288	0.25	1	0.313163	0.288	0.245	1	0.287771	0.245	0.25	1	-0.278658	0.36	0.367	1	0.449178	0.36	0.349	1	0.17052	0.349	0.367	1	-0.0265186
Arid5a	0.532981	0.019	0.014	0.0146258	0.670156	0.019	0.033	0.0236523	1.20314	0.033	0.014	8.9e-20	-0.651668	0.012	0.014	1	0.37077	0.012	0.01	1	-0.280898	0.01	0.014	1	-0.464097	0.019	0.021	1	1.84981	0.019	0.048	2.26e-09	1.38572	0.048	0.021	8.9e-09	0.0973102	0.03	0.034	1	-0.996625	0.03	0.012	1	-0.899315	0.012	0.034	1	0.821703
Arid5b	-0.266075	0.391	0.429	2.03e-14	-0.165127	0.391	0.352	3.11e-11	-0.431201	0.352	0.429	1.99e-63	0.354183	0.292	0.197	3.63e-11	-0.0206172	0.292	0.236	1.29e-06	0.333566	0.236	0.197	1	-0.0770265	0.388	0.36	1	0.126696	0.388	0.317	0.00433206	0.0496696	0.317	0.36	0.329811	-0.279214	0.357	0.367	1	0.149052	0.357	0.277	1	-0.130161	0.277	0.367	1	-0.000863185
Arih1	-0.0256439	0.594	0.601	0.586049	0.42746	0.594	0.723	1.53e-146	0.401817	0.723	0.601	2.18e-106	0.150779	0.501	0.41	0.00470924	0.243082	0.501	0.508	1	0.393861	0.508	0.41	6.69e-12	0.0273786	0.423	0.375	1	0.739962	0.423	0.472	1.87e-32	0.767341	0.472	0.375	8.4e-40	-0.264748	0.565	0.565	1	0.558806	0.565	0.6	1	0.294058	0.6	0.565	1	0.0142719
Arih2	0.125831	0.333	0.293	1	-0.0158311	0.333	0.357	1	0.11	0.357	0.293	1	0.0430605	0.231	0.179	0.473634	0.141728	0.231	0.22	1	0.184788	0.22	0.179	1	0.181913	0.17	0.139	1	0.88477	0.17	0.211	0.0123762	1.06668	0.211	0.139	1.91e-10	0.188184	0.238	0.224	1	-0.128694	0.238	0.191	1	0.0594908	0.191	0.224	1	-0.0905105
Arl1	0.552985	0.035	0.03	1	-1.51451	0.035	0.014	0.000840241	-0.96153	0.014	0.03	1.61e-06	-0.491261	0.059	0.062	1	0.0416127	0.059	0.046	1	-0.449648	0.046	0.062	1	-0.0997262	0.041	0.04	1	-0.468076	0.041	0.018	8.18e-12	-0.567802	0.018	0.04	1.33e-14	0.66701	0.077	0.041	1	-1.01291	0.077	0.028	1	-0.345898	0.028	0.041	1	1.12501
Arl10	-0.481741	0.01	0.01	1	0.757972	0.01	0.016	1	0.276231	0.016	0.01	1	-0.155691	0.03	0.027	1	-0.0456864	0.03	0.028	1	-0.201377	0.028	0.027	1	-0.297128	0.018	0.018	1	0.200983	0.018	0.014	1	-0.0961451	0.014	0.018	1	-0.683348	0.036	0.034	1	-0.30774	0.036	0.026	1	-0.991088	0.026	0.034	1	-1.33184
Arl11
Arl13a	-0.44002	0.012	0.015	1	1.90388	0.012	0.044	1.19e-41	1.46386	0.044	0.015	1.19e-34
Arl13b	0.925518	0.15	0.085	1.73e-40	-0.430793	0.15	0.124	1.31e-18	0.494725	0.124	0.085	0.0513484	-0.159487	0.124	0.116	1	0.16965	0.124	0.12	1	0.0101632	0.12	0.116	1	0.122212	0.087	0.081	1	0.145872	0.087	0.068	0.000202896	0.268085	0.068	0.081	0.289645	0.399548	0.152	0.112	1	-0.494007	0.152	0.103	1	-0.0944591	0.103	0.112	1	0.719028
Arl14
Arl14ep	0.0767517	0.087	0.08	1	-0.738281	0.087	0.056	8.03e-27	-0.661529	0.056	0.08	2.27e-20	0.0532899	0.074	0.053	1	-0.643344	0.074	0.039	1.09e-12	-0.590054	0.039	0.053	0.00180207	0.00355361	0.05	0.038	1	-0.518972	0.05	0.022	1.74e-19	-0.515419	0.022	0.038	6.13e-11	-0.280056	0.077	0.068	1	-0.4636	0.077	0.029	1	-0.743656	0.029	0.068	1	0.227681
Arl14epl
Arl15	-0.41447	0.378	0.433	5.28e-39	0.316426	0.378	0.468	1.44e-23	-0.0980441	0.468	0.433	1	0.0217567	0.781	0.72	1	-0.121558	0.781	0.715	6.86e-05	-0.099801	0.715	0.72	1	-0.19598	0.68	0.636	1	0.15071	0.68	0.631	1	-0.0452703	0.631	0.636	1	0.388544	0.577	0.483	1	-0.0367145	0.577	0.525	1	0.35183	0.525	0.483	1	-0.20756
Arl16	0.967075	0.015	0.008	1	-2.00598	0.015	0.004	9.88e-12					0.259783	0.019	0.015	1	-0.841191	0.019	0.009	0.0846744	-0.581407	0.009	0.015	1	0.0929735	0.014	0.011	1	-1.31478	0.014	0.004	1.33e-07	-1.22181	0.004	0.011	0.000862892	-1.17456	0.024	0.024	1	-0.0602068	0.024	0.01	1	-1.23477	0.01	0.024	1	1.15631
Arl2	0.365957	0.051	0.039	1	-0.760499	0.051	0.036	1	-0.394542	0.036	0.039	1	0.0595773	0.019	0.015	1	-0.738884	0.019	0.009	1	-0.679307	0.009	0.015	1	-0.0572581	0.019	0.014	1	-0.306144	0.019	0.01	1	-0.363402	0.01	0.014	1	0.62757	0.018	0.007	1	-1.86583	0.018	0.004	1					-0.050291
Arl2bp	-0.156239	0.096	0.097	0.0994447	-0.668409	0.096	0.066	1.16e-15	-0.824648	0.066	0.097	5.62e-43	0.407768	0.033	0.018	1	0.0516213	0.033	0.025	1	0.459389	0.025	0.018	1	-0.119922	0.037	0.03	1	0.0910394	0.037	0.019	1.53e-10	-0.0288829	0.019	0.03	9.73e-10	0.119703	0.027	0.027	1	-0.316801	0.027	0.015	1	-0.197098	0.015	0.027	1	-0.86625
Arl3	-0.0310384	0.258	0.254	1	-0.29123	0.258	0.236	1.23e-07	-0.322268	0.236	0.254	1e-15	-0.12154	0.138	0.129	1	-0.222215	0.138	0.108	3.66e-09	-0.343755	0.108	0.129	8.31e-10	0.19007	0.052	0.039	1	-0.449907	0.052	0.03	4.91e-14	-0.259837	0.03	0.039	1.79e-13	-0.796514	0.083	0.105	1	-0.0940821	0.083	0.066	1	-0.890596	0.066	0.105	1	-0.503748
Arl4a	0.274572	0.033	0.025	1	-0.754225	0.033	0.021	1.2e-05	-0.479653	0.021	0.025	1	-0.280013	0.029	0.026	1	0.519269	0.029	0.033	1	0.239255	0.033	0.026	1	0.271033	0.054	0.038	1	0.263883	0.054	0.042	1	0.534916	0.042	0.038	1	0.731844	0.062	0.044	1	0.205237	0.062	0.07	1	0.937081	0.07	0.044	1	0.8992
Arl4c																									-0.0239835	0.025	0.022	1	-0.51456	0.025	0.011	0.000355104	-0.538543	0.011	0.022	0.000718031	-1.05765	0.015	0.024	1	0.137526	0.015	0.013	1	-0.920125	0.013	0.024	1
Arl4d					1.87365	0.009	0.034	7.91e-72	1.52902	0.034	0.009	3.93e-57													-0.0405617	0.021	0.02	1	1.75218	0.021	0.039	1.12e-07	1.71161	0.039	0.02	4.24e-08	-1.54494	0.012	0.027	1	2.49787	0.012	0.042	1	0.952931	0.042	0.027	1
Arl5a	-0.196501	0.114	0.127	0.446734	-0.133507	0.114	0.109	1	-0.330008	0.109	0.127	9.89e-08	-0.0476096	0.164	0.138	1	-0.13768	0.164	0.124	4.23e-07	-0.185289	0.124	0.138	1	0.238745	0.075	0.06	1	-0.390946	0.075	0.036	3.67e-25	-0.1522	0.036	0.06	1.99e-11	-0.045826	0.152	0.167	1	-0.352978	0.152	0.084	1	-0.398804	0.084	0.167	1	0.884008
Arl5b	0.038404	0.084	0.084	1	-0.231437	0.084	0.074	0.910422	-0.193033	0.074	0.084	1	-0.135409	0.097	0.09	1	1.247	0.097	0.162	1.18e-17	1.11159	0.162	0.09	6.19e-21	-0.241091	0.12	0.126	1	1.83017	0.12	0.223	2.37e-62	1.58908	0.223	0.126	3.92e-52	-0.264608	0.131	0.146	1	0.128404	0.131	0.105	1	-0.136204	0.105	0.146	1	-0.22792
Arl5c																																					-0.0596087	0.012	0.003	1	-1.69166	0.012	0.003	1
Arl6	0.047652	0.03	0.026	1	-0.262097	0.03	0.025	1	-0.214445	0.025	0.026	1	-0.112399	0.025	0.024	1	-0.0610074	0.025	0.02	1	-0.173406	0.02	0.024	1	-0.329325	0.012	0.011	1	0.093365	0.012	0.007	0.685971	-0.23596	0.007	0.011	1	-1.16679	0.021	0.027	1	1.74009	0.021	0.023	1	0.573303	0.023	0.027	1	0.994021
Arl6ip1	0.571278	0.035	0.03	1	-1.17484	0.035	0.018	0.000756219	-0.603563	0.018	0.03	1	-0.18469	0.034	0.037	1	-0.134922	0.034	0.028	1	-0.319612	0.028	0.037	1	-0.221783	0.068	0.069	1	-0.13113	0.068	0.038	1.2e-10	-0.352914	0.038	0.069	2.46e-10	-1.03394	0.048	0.054	1	0.755695	0.048	0.044	1	-0.278249	0.044	0.054	1	0.977522
Arl6ip4	1.00158	0.014	0.007	1	-2.18238	0.014	0.003	1					-0.112428	0.011	0.01	1	0.160898	0.011	0.01	1	0.0484705	0.01	0.01	1	0.346245	0.023	0.016	1	-0.329259	0.023	0.01	0.000120989	0.0169861	0.01	0.016	1	-0.29935	0.03	0.014	1	-0.426592	0.03	0.012	1	-0.725942	0.012	0.014	1	-0.659157
Arl6ip5	-0.0280297	0.239	0.237	1	0.247374	0.239	0.286	8.38e-10	0.219344	0.286	0.237	0.000165886	-0.0640243	0.131	0.107	1	-0.215938	0.131	0.095	2.37e-08	-0.279963	0.095	0.107	1	-0.00765483	0.106	0.087	1	0.0682776	0.106	0.074	2.73e-07	0.0606228	0.074	0.087	0.320907	-1.18874	0.104	0.16	1	0.652426	0.104	0.111	1	-0.536315	0.111	0.16	1	-0.341985
Arl6ip6	-0.175709	0.131	0.136	1	0.55652	0.131	0.186	2.59e-20	0.38081	0.186	0.136	1.09e-12	0.0127357	0.047	0.036	1	0.387716	0.047	0.051	1	0.400451	0.051	0.036	1	0.222726	0.053	0.042	1	0.274427	0.053	0.042	0.956476	0.497153	0.042	0.042	1	-0.724463	0.051	0.075	1	0.524368	0.051	0.049	1	-0.200095	0.049	0.075	1	-0.787955
Arl8a	0.731972	0.016	0.012	1	-1.78745	0.016	0.007	1.23e-20	-1.05548	0.007	0.012	1.16e-07	0.158563	0.11	0.085	1	-0.376622	0.11	0.068	7.01e-12	-0.218059	0.068	0.085	0.0926433	0.00743063	0.073	0.068	1	-0.212902	0.073	0.043	6.68e-13	-0.205471	0.043	0.068	7.36e-10	-0.178055	0.068	0.071	1	-0.163959	0.068	0.045	1	-0.342014	0.045	0.071	1	0.255536
Arl8b	-0.129874	0.142	0.155	1	0.0220843	0.142	0.15	1	-0.107789	0.15	0.155	1	-0.203019	0.124	0.12	1	0.122659	0.124	0.115	1	-0.08036	0.115	0.12	1	-0.130575	0.099	0.094	1	0.302765	0.099	0.078	0.104944	0.17219	0.078	0.094	0.0712805	-0.712303	0.11	0.143	1	-0.178532	0.11	0.067	1	-0.890835	0.067	0.143	1	-0.184103
Arl9
Armc1	-0.153508	0.157	0.167	1	0.199075	0.157	0.191	2.39e-05	0.0455672	0.191	0.167	1	-0.372227	0.051	0.05	1	0.177118	0.051	0.046	1	-0.195108	0.046	0.05	1	0.164775	0.057	0.049	1	0.190783	0.057	0.041	0.00165482	0.355558	0.041	0.049	0.137407	0.0824306	0.068	0.065	1	0.505383	0.068	0.06	1	0.587814	0.06	0.065	1	-0.687256
Armc10	0.198582	0.02	0.014	1	-0.920898	0.02	0.011	0.208218	-0.722316	0.011	0.014	1	0.338888	0.028	0.018	1	-0.66605	0.028	0.014	0.0189827	-0.327162	0.014	0.018	1	-0.340907	0.023	0.026	1	-0.410702	0.023	0.011	3.86e-06	-0.751609	0.011	0.026	3.2e-05	0.0669335	0.036	0.037	1	-0.763246	0.036	0.016	1	-0.696312	0.016	0.037	1	0.040002
Armc12
Armc2	-0.108627	0.11	0.118	1	0.302434	0.11	0.149	3.06e-09	0.193806	0.149	0.118	1					0.755998	0.009	0.012	1	1.30428	0.012	0.004	1
Armc3
Armc4
Armc5	0.89362	0.015	0.007	1	-1.8472	0.015	0.005	3.26e-05					0.661345	0.033	0.018	1	-0.0530637	0.033	0.025	1	0.608281	0.025	0.018	1	0.649984	0.028	0.018	1	0.167082	0.028	0.024	1	0.817067	0.024	0.018	1	0.444548	0.051	0.024	1	-0.0501642	0.051	0.035	1	0.394384	0.035	0.024	1	0.150652
Armc6	-0.0219546	0.039	0.031	1	-0.393532	0.039	0.033	1	-0.415487	0.033	0.031	1	-0.196457	0.019	0.019	1	-0.166738	0.019	0.014	1	-0.363195	0.014	0.019	1	0.355567	0.014	0.012	1	-0.245134	0.014	0.009	1	0.110433	0.009	0.012	1	-2.82673	0.003	0.014	1					-0.904171	0.006	0.014	1	0.441443
Armc7	-0.111405	0.011	0.009	1	-0.0817603	0.011	0.009	0.437178					-0.316266	0.014	0.012	1	-0.169267	0.014	0.008	1	-0.485533	0.008	0.012	1	0.213406	0.015	0.013	1	-0.451745	0.015	0.008	0.037432	-0.238339	0.008	0.013	0.979771	-1.25944	0.015	0.037	1	0.0937294	0.015	0.016	1	-1.16571	0.016	0.037	1	-0.69731
Armc8	-0.223519	0.264	0.295	2.84e-08	0.283034	0.264	0.331	3.97e-24	0.0595147	0.331	0.295	1	-0.141749	0.205	0.183	1	0.286371	0.205	0.198	1	0.144622	0.198	0.183	1	-0.0604971	0.219	0.195	1	0.148091	0.219	0.16	1.52e-07	0.0875938	0.16	0.195	0.00244453	-0.340703	0.226	0.265	1	0.190783	0.226	0.197	1	-0.14992	0.197	0.265	1	-0.103732
Armc9	0.188361	0.083	0.069	1	-0.255492	0.083	0.075	0.000106694	-0.067131	0.075	0.069	1	-0.0799747	0.108	0.091	1	-0.0741703	0.108	0.09	1	-0.154145	0.09	0.091	1	0.740901	0.047	0.026	1	-0.394017	0.047	0.028	7.88e-10	0.346884	0.028	0.026	1	0.627703	0.104	0.061	1	-0.155495	0.104	0.076	1	0.472208	0.076	0.061	1	-0.426744
Armcx1													0.0709946	0.046	0.038	1	0.391566	0.046	0.05	1	0.46256	0.05	0.038	1	0.691998	0.018	0.01	1	-0.0282845	0.018	0.011	1	0.663713	0.011	0.01	1	-0.0337653	0.045	0.041	1	-0.752352	0.045	0.022	1	-0.786118	0.022	0.041	1	0.425661
Armcx2													-0.118447	0.035	0.029	1	0.393998	0.035	0.033	1	0.275551	0.033	0.029	1	0.259235	0.014	0.01	1	-0.841637	0.014	0.004	0.000761529	-0.582402	0.004	0.01	1	-0.498316	0.015	0.027	1	-1.1513	0.015	0.012	1	-1.64962	0.012	0.027	1	-2.40066
Armcx3													-0.0598704	0.062	0.052	1	0.596217	0.062	0.074	1	0.536346	0.074	0.052	1	0.0048419	0.034	0.028	1	0.415031	0.034	0.025	1	0.419873	0.025	0.028	1	-1.00044	0.03	0.044	1	2.09097	0.03	0.054	1	1.09053	0.054	0.044	1	-0.811684
Armcx4	-0.962166	0.006	0.015	2.24e-06					-2.82878	0.001	0.015	1.21e-20	-0.17174	0.027	0.022	1	-0.00107299	0.027	0.021	1	-0.172813	0.021	0.022	1													-1.14442	0.015	0.014	1	0.994882	0.015	0.015	1	-0.149541	0.015	0.014	1	1.8066
Armcx5	0.0418956	0.024	0.018	1	-0.215692	0.024	0.028	1	-0.173796	0.028	0.018	5.02e-08	0.0717038	0.021	0.014	1	-0.27555	0.021	0.017	1	-0.203847	0.017	0.014	1					1.71126	0.003	0.013	0.000607109	1.14038	0.013	0.004	0.00573635	1.41915	0.012	0.003	1	1.08387	0.012	0.031	1	2.50302	0.031	0.003	1
Armcx6
Armh1
Armh2
Armh3	0.0640347	0.375	0.321	0.000116133	0.507793	0.375	0.632	1.31e-252	0.571828	0.632	0.321	0	0.369759	0.153	0.095	7.64e-08	0.428472	0.153	0.204	1	0.798232	0.204	0.095	1.33e-19	0.648986	0.093	0.05	7.12e-09	0.813061	0.093	0.171	4.9e-23	1.46205	0.171	0.05	2.18e-70	-0.375271	0.128	0.116	1	1.03434	0.128	0.266	0.943757	0.659067	0.266	0.116	0.0397504	0.0357563
Armh4	0.127657	0.082	0.068	1	0.756055	0.082	0.152	4.55e-58	0.883713	0.152	0.068	1.73e-91	1.92588	0.013	0.002	1	1.04158	0.013	0.025	1	2.96746	0.025	0.002	3.22e-06
Armt1	0.392506	0.027	0.023	1	-0.327077	0.027	0.025	1	0.0654292	0.025	0.023	0.000324056	0.209681	0.065	0.046	1	-0.280713	0.065	0.044	0.00572964	-0.0710324	0.044	0.046	1	0.0611169	0.025	0.02	1	-0.136498	0.025	0.014	0.00342103	-0.0753807	0.014	0.02	0.067598	1.68898	0.077	0.027	1	-0.947159	0.077	0.028	1	0.741821	0.028	0.027	1	1.36144
Arnt	0.0076288	0.372	0.362	1	0.0328909	0.372	0.413	0.0472067	0.0405197	0.413	0.362	1	-0.148087	0.37	0.337	1	0.162393	0.37	0.358	1	0.0143065	0.358	0.337	1	0.0835209	0.235	0.193	1	0.456982	0.235	0.219	1	0.540503	0.219	0.193	1	-0.194841	0.318	0.344	1	0.264687	0.318	0.291	1	0.0698459	0.291	0.344	1	-0.135011
Arnt2													0.196818	0.011	0.008	1	-0.514324	0.011	0.005	1																	4.59765	0.027	0	1	-0.813261	0.027	0.006	1
Arntl	-2.78604	0.01	0.054	1.11e-101	1.11043	0.01	0.025	4.65e-18	-1.67562	0.025	0.054	8.02e-44	-2.3583	0.03	0.117	8.39e-45	2.3484	0.03	0.125	5.72e-52	-0.00989973	0.125	0.117	1	-1.79806	0.021	0.063	2.2e-22	1.96986	0.021	0.057	2.05e-17	0.171796	0.057	0.063	1	0.12046	0.024	0.024	1	-1.01981	0.024	0.012	1	-0.899348	0.012	0.024	1	-3.10238
Arntl2	-0.00988069	0.085	0.078	1	-0.198119	0.085	0.076	6.95e-06	-0.208	0.076	0.078	1	-0.00235626	0.086	0.07	1	-0.433113	0.086	0.054	1.1e-09	-0.435469	0.054	0.07	0.150736	0.0983834	0.028	0.018	1	-0.392203	0.028	0.012	1.55e-14	-0.293819	0.012	0.018	0.000305758	1.39683	0.033	0.01	1	-0.0831729	0.033	0.02	1	1.31365	0.02	0.01	1	0.475174
Arpc1a	0.17933	0.079	0.068	1	-0.990989	0.079	0.045	2.15e-18	-0.811659	0.045	0.068	2.79e-09	-0.101214	0.118	0.099	1	-0.496629	0.118	0.07	2.54e-15	-0.597843	0.07	0.099	1.17e-05	-0.0412572	0.101	0.093	1	-0.267487	0.101	0.058	2.4e-17	-0.308744	0.058	0.093	4.17e-12	0.379823	0.101	0.065	1	-0.762259	0.101	0.038	1	-0.382437	0.038	0.065	1	0.202071
Arpc1b													0.121389	0.185	0.138	0.00505328	-0.522918	0.185	0.114	6.53e-25	-0.401528	0.114	0.138	0.0102944	-0.0927769	0.142	0.136	1	-0.0480052	0.142	0.099	1.27e-12	-0.140782	0.099	0.136	2.65e-10	0.391787	0.152	0.112	1	-0.523326	0.152	0.095	1	-0.13154	0.095	0.112	1	0.547715
Arpc2	0.200549	0.154	0.135	0.125392	-0.483559	0.154	0.134	1.23e-10	-0.283011	0.134	0.135	1	0.136195	0.226	0.174	0.0746556	-0.0790859	0.226	0.191	0.0160186	0.0571096	0.191	0.174	1	0.0633667	0.306	0.279	1	0.673573	0.306	0.338	1.27e-08	0.73694	0.338	0.279	1.73e-16	-0.31091	0.274	0.306	1	-0.0351915	0.274	0.218	1	-0.346101	0.218	0.306	1	-0.162955
Arpc3	1.85509	0.036	0.014	0.820923	-3.39994	0.036	0.004	4.23e-17	-1.54485	0.004	0.014	0.00513747	0.424889	0.104	0.067	0.176318	0.082629	0.104	0.089	1	0.507518	0.089	0.067	1	-0.153483	0.166	0.174	1	0.952853	0.166	0.214	3.85e-16	0.799369	0.214	0.174	1.04e-09	0.142004	0.119	0.116	1	-0.799393	0.119	0.068	1	-0.657388	0.068	0.116	1	-0.0787834
Arpc4	2.32486	0.011	0.004	1	-2.78135	0.011	0.002	1					0.499712	0.05	0.027	1	1.10375	0.05	0.086	1.57e-05	1.60346	0.086	0.027	2.61e-20	0.104922	0.061	0.05	1	0.933889	0.061	0.08	0.415232	1.03881	0.08	0.05	7.2e-06	-0.561618	0.036	0.044	1	-0.647568	0.036	0.019	1	-1.20919	0.019	0.044	1	-0.206262
Arpc5	0.456574	0.046	0.036	1	-0.593837	0.046	0.037	1	-0.137263	0.037	0.036	1	-0.128508	0.085	0.081	1	-0.0502753	0.085	0.066	1	-0.178783	0.066	0.081	1	-0.0438205	0.106	0.1	1	0.461344	0.106	0.088	1	0.417523	0.088	0.1	1	0.411311	0.092	0.085	1	-0.637201	0.092	0.042	1	-0.225889	0.042	0.085	1	0.583178
Arpc5l	1.02071	0.074	0.04	1	-0.554588	0.074	0.057	1	0.466127	0.057	0.04	1	0.370856	0.042	0.025	1	-0.35176	0.042	0.026	0.225625	0.0190966	0.026	0.025	1	-0.00490069	0.048	0.042	1	-0.212133	0.048	0.027	0.00017195	-0.217033	0.027	0.042	0.00126286	-0.807418	0.039	0.058	1	-0.794424	0.039	0.013	1	-1.60184	0.013	0.058	1	0.895021
Arpin	-0.233204	0.03	0.032	1	-0.544475	0.03	0.021	0.00850148	-0.777679	0.021	0.032	0.00371711	-0.0436504	0.018	0.012	1	-0.584997	0.018	0.01	0.0940655	-0.628647	0.01	0.012	1	-0.364932	0.018	0.019	1	-0.340363	0.018	0.009	0.00100165	-0.705295	0.009	0.019	0.000152243	0.0756372	0.018	0.01	1	-0.818906	0.018	0.006	1	-0.743269	0.006	0.01	1	0.480356
Arpp19	-0.0713442	0.117	0.11	1	-0.119635	0.117	0.109	1	-0.190979	0.109	0.11	1	0.184688	0.057	0.04	1	-0.493598	0.057	0.035	0.339579	-0.30891	0.035	0.04	1	0.480216	0.087	0.058	1	-0.561054	0.087	0.038	1.59e-20	-0.0808383	0.038	0.058	0.00046955	0.777972	0.104	0.058	1	-0.606278	0.104	0.057	1	0.171694	0.057	0.058	1	0.911257
Arpp21	-0.606812	0.017	0.02	1	0.734634	0.017	0.027	0.528801	0.127822	0.027	0.02	1
Arr3
Arrb1					-0.727663	0.009	0.014	1	0.791005	0.014	0.008	1	0.0969902	0.207	0.166	1	-0.356097	0.207	0.143	2.94e-16	-0.259107	0.143	0.166	0.0967772	-0.0933942	0.08	0.073	1	-0.174433	0.08	0.051	4.12e-13	-0.267828	0.051	0.073	8.97e-08	0.123745	0.366	0.272	1	-0.167648	0.366	0.259	1	-0.0439031	0.259	0.272	1	0.171932
Arrb2													0.594434	0.018	0.011	1	-0.885469	0.018	0.01	2.27e-06	-0.291035	0.01	0.011	0.250993	1.45779	0.011	0.004	1	-0.214441	0.011	0.006	0.000598358					-1.6654	0.012	0.014	1	1.54379	0.012	0.015	1	-0.121608	0.015	0.014	1	4.48146
Arrdc1													0.303161	0.016	0.01	1	-0.151588	0.016	0.011	1	0.151573	0.011	0.01	1	0.288122	0.058	0.042	1	-0.316376	0.058	0.034	6.89e-08	-0.0282541	0.034	0.042	1	-0.750858	0.045	0.048	1	-0.0140013	0.045	0.025	1	-0.764859	0.025	0.048	1	0.609495
Arrdc2	1.68118	0.081	0.02	2.6e-97	-1.16445	0.081	0.042	1.78e-60	0.516724	0.042	0.02	6.45e-05	-1.4989	0.005	0.011	1	1.61514	0.005	0.011	1	0.116248	0.011	0.011	1																									-1.83478
Arrdc3	-0.0647166	0.13	0.132	1	0.860744	0.13	0.218	1.2e-92	0.796027	0.218	0.132	7.31e-68	-0.669917	0.053	0.061	1	2.69397	0.053	0.176	4.4e-63	2.02405	0.176	0.061	7.1e-51	-0.211701	0.019	0.013	1	-2.26618	0.019	0.002	2.56e-08	-2.47788	0.002	0.013	1.29e-10	0.056231	0.068	0.051	1	0.654418	0.068	0.063	1	0.710649	0.063	0.051	1	-3.00083
Arrdc4	0.652749	0.018	0.01	1	-0.733034	0.018	0.012	1	-0.0802845	0.012	0.01	1	-0.587248	0.017	0.017	1	-0.484191	0.017	0.008	1	-1.07144	0.008	0.017	1	-0.592851	0.06	0.068	1	-0.490132	0.06	0.028	1.23e-18	-1.08298	0.028	0.068	1.02e-29	-2.32429	0.009	0.027	1	1.51215	0.009	0.012	1	-0.812141	0.012	0.027	1	0.251569
Arrdc5
Arsa													-0.619111	0.016	0.02	1	0.121581	0.016	0.014	1	-0.49753	0.014	0.02	1	0.43867	0.033	0.025	1	-0.614211	0.033	0.017	1.1e-07	-0.175541	0.017	0.025	0.249245	-1.81397	0.015	0.031	1	0.660381	0.015	0.013	1	-1.15359	0.013	0.031	1	-0.6288
Arsb	-0.569712	0.031	0.053	1	0.485589	0.031	0.05	1	-0.0841228	0.05	0.053	1	-0.364448	0.097	0.094	1	0.520693	0.097	0.106	1	0.156244	0.106	0.094	1	0.0809849	0.057	0.045	1	-0.0946845	0.057	0.035	8.15e-10	-0.0136996	0.035	0.045	0.753922	0.218575	0.074	0.051	1	0.475233	0.074	0.068	1	0.693808	0.068	0.051	1	0.48266
Arsg	-0.16256	0.058	0.057	1	0.324344	0.058	0.069	1	0.161784	0.069	0.057	1	-0.488928	0.012	0.014	1	0.604965	0.012	0.016	1	0.116037	0.016	0.014	1													0.806149	0.024	0.014	1	-1.24364	0.024	0.007	1	-0.43749	0.007	0.014	1
Arsi													-1.00506	0.015	0.023	1	-0.598117	0.015	0.009	1	-1.60318	0.009	0.023	4.52e-06	-0.305661	0.015	0.017	1	-0.227736	0.015	0.009	1	-0.533397	0.009	0.017	0.148684
Arsj													-0.483893	0.153	0.169	1	0.558988	0.153	0.165	1	0.0750942	0.165	0.169	1													-0.259905	0.009	0.017	1	0.747216	0.009	0.02	1	0.487312	0.02	0.017	1
Arsk	-0.0111214	0.077	0.074	1	-0.379348	0.077	0.062	5.7e-08	-0.390469	0.062	0.074	4.62e-11	-0.126509	0.068	0.055	1	-0.0130255	0.068	0.054	0.455525	-0.139534	0.054	0.055	1	0.410987	0.039	0.027	1	-0.592057	0.039	0.018	3.54e-16	-0.18107	0.018	0.027	2.93e-05	-0.715696	0.051	0.065	1	0.781617	0.051	0.048	1	0.0659208	0.048	0.065	1	-1.08642
Art1	0.615163	0.87	0.775	1.87e-275	-0.480671	0.87	0.863	2.68e-171	0.134492	0.863	0.775	1.95e-31
Art2b
Art3	1.14499	0.76	0.542	0	-1.05535	0.76	0.606	0	0.0896355	0.606	0.542	0.00183673													-1.34313	0.046	0.08	1	1.16536	0.046	0.05	1.9e-69	-0.177763	0.05	0.08	5.81e-46													0.094349
Art4	0.00307967	0.034	0.033	1	-0.988637	0.034	0.017	1	-0.985557	0.017	0.033	0.0226229	-0.550926	0.022	0.027	1	0.711989	0.022	0.03	1	0.161063	0.03	0.027	1													-0.52041	0.068	0.058	1	1.7005	0.068	0.102	1	1.18009	0.102	0.058	1
Art5	0.927166	0.31	0.17	7.19e-62	0.647935	0.31	0.447	8.9e-100	1.5751	0.447	0.17	0
Artn
Arv1	-0.0242155	0.115	0.11	1	-0.4742	0.115	0.09	1.16e-20	-0.498416	0.09	0.11	1.21e-22	0.376885	0.041	0.026	1	-1.08091	0.041	0.018	8.62e-16	-0.704027	0.018	0.026	2.76e-07	-0.323109	0.021	0.024	1	-0.340926	0.021	0.012	4.65e-08	-0.664036	0.012	0.024	2.54e-12	0.992579	0.048	0.027	1	-0.840095	0.048	0.02	1	0.152484	0.02	0.027	1	0.478864
Arvcf	-0.107057	0.085	0.087	1	-0.31724	0.085	0.07	5.86e-05	-0.424296	0.07	0.087	4.67e-13					0.665265	0.007	0.013	1	0.798938	0.013	0.006	1
Arx
Arxes1
Arxes2
As3mt	0.183137	0.28	0.247	1	-0.214437	0.28	0.268	0.0243731	-0.0313001	0.268	0.247	1	3.09272	0.016	0.003	1	0.196215	0.016	0.015	0.0021195	3.28893	0.015	0.003	1	1.73128	0.032	0.011	1	-0.415321	0.032	0.017	2.28e-12	1.31596	0.017	0.011	0.347705	0.661096	0.045	0.027	1	0.329746	0.045	0.047	1	0.990841	0.047	0.027	1	2.2937
Asah1	-0.02738	0.108	0.109	1	-0.194046	0.108	0.102	1	-0.221426	0.102	0.109	1	0.0806817	0.081	0.065	1	0.0816662	0.081	0.071	1	0.162348	0.071	0.065	1	0.595146	0.08	0.051	0.0117169	-0.191589	0.08	0.048	5.1e-14	0.403557	0.048	0.051	1	0.872699	0.086	0.068	1	-0.215558	0.086	0.06	1	0.657141	0.06	0.068	1	0.111571
Asah2	0.122451	0.085	0.077	1	0.266578	0.085	0.11	1.5e-09	0.38903	0.11	0.077	4.36e-18	0.15246	0.079	0.058	1	0.850066	0.079	0.107	0.415302	1.00253	0.107	0.058	4.35e-11	-0.0486197	0.172	0.146	1	0.894225	0.172	0.208	7.05e-10	0.845605	0.208	0.146	3.5e-20	-0.747264	0.11	0.167	1	1.48969	0.11	0.188	1	0.742421	0.188	0.167	1	-0.720662
Asap1	0.00898644	0.713	0.707	1	0.0385065	0.713	0.764	0.0860043	0.047493	0.764	0.707	0.117524	0.127888	0.772	0.663	3.46e-06	-0.189013	0.772	0.679	6.8e-15	-0.0611246	0.679	0.663	1	0.179022	0.557	0.461	1.3e-08	0.173231	0.557	0.507	1	0.352253	0.507	0.461	1.1e-05	0.423182	0.545	0.418	1	0.12371	0.545	0.527	1	0.546892	0.527	0.418	1	-0.262484
Asap2	-0.0718581	0.231	0.238	1	-0.350332	0.231	0.204	4.24e-21	-0.42219	0.204	0.238	5.75e-37	-0.281287	0.189	0.185	1	-0.227139	0.189	0.144	4.04e-12	-0.508425	0.144	0.185	1.95e-12	-0.13744	0.462	0.433	1	-0.223855	0.462	0.33	3.46e-31	-0.361294	0.33	0.433	2.72e-30	-0.114002	0.562	0.527	1	-0.196155	0.562	0.438	1	-0.310157	0.438	0.527	1	-0.462796
Asap3	0.0658675	0.341	0.307	1	-0.531945	0.341	0.276	7.01e-54	-0.466077	0.276	0.307	2.24e-37	-0.164251	0.242	0.206	1	-0.323732	0.242	0.167	4.46e-25	-0.487983	0.167	0.206	1.36e-12													-0.917626	0.024	0.014	1	1.56215	0.024	0.028	1	0.644525	0.028	0.014	1
Asb1	0.719464	0.049	0.035	0.00639252	-0.550488	0.049	0.041	1	0.168976	0.041	0.035	1	0.714502	0.016	0.011	1	0.0652	0.016	0.013	1	0.779702	0.013	0.011	1													-0.0606138	0.039	0.037	1	-1.60287	0.039	0.012	1	-1.66349	0.012	0.037	1	0.386229
Asb10	-0.138916	0.274	0.281	1	-0.657954	0.274	0.2	4.76e-52	-0.796869	0.2	0.281	3.27e-89
Asb11	-0.366662	0.408	0.475	2.23e-55	0.147197	0.408	0.465	4.59e-16	-0.219465	0.465	0.475	8.12e-12
Asb12	-0.0111583	0.01	0.011	1	-0.190545	0.01	0.009	1	-0.201703	0.009	0.011	1
Asb13	0.196785	0.053	0.042	1	-0.940174	0.053	0.031	8.2e-19	-0.743389	0.031	0.042	1.31e-14	0.096569	0.077	0.058	1	-0.930719	0.077	0.034	3.9e-17	-0.834149	0.034	0.058	8.63e-09	0.0740959	0.045	0.039	1	-0.837906	0.045	0.018	1.31e-19	-0.76381	0.018	0.039	1.08e-13	-0.283103	0.074	0.075	1	-1.16377	0.074	0.02	0.871146	-1.44687	0.02	0.075	0.0683083	0.00129532
Asb14	-0.143096	0.712	0.728	3.56e-12	0.037783	0.712	0.767	0.00602638	-0.105313	0.767	0.728	1
Asb15	0.0385887	0.516	0.51	1	0.0460524	0.516	0.557	1	0.0846411	0.557	0.51	1
Asb16
Asb17
Asb18	-0.187687	0.513	0.543	1.19e-10	0.056089	0.513	0.551	0.339002	-0.131598	0.551	0.543	0.944475
Asb2	0.0669056	0.735	0.728	1	0.00168694	0.735	0.79	5.13e-05	0.0685925	0.79	0.728	2.07e-06
Asb3	-0.0908575	0.358	0.359	1	0.414465	0.358	0.449	1.92e-45	0.323608	0.449	0.359	1.95e-30	-0.153078	0.256	0.219	1	0.304661	0.256	0.246	1	0.151583	0.246	0.219	1	0.178594	0.172	0.128	0.114415	0.141167	0.172	0.126	8.58e-11	0.319761	0.126	0.128	1	-0.0363823	0.324	0.272	1	0.11664	0.324	0.246	1	0.0802581	0.246	0.272	1	-0.0699656
Asb4	-0.83084	0.068	0.106	2.33e-31	0.463565	0.068	0.086	3.84e-05	-0.367275	0.086	0.106	1.09e-08													-0.792782	0.005	0.01	1	1.5932	0.005	0.012	1	0.800423	0.012	0.01	1
Asb5	-0.769915	0.08	0.111	6.19e-19	0.857202	0.08	0.132	9.43e-34	0.0872868	0.132	0.111	1					1.46548	0.009	0.018	1	1.99868	0.018	0.004	1													1.86331	0.03	0.007	1	0.176223	0.03	0.019	1	2.03953	0.019	0.007	1
Asb6	1.72647	0.026	0.01	1	-0.907815	0.026	0.016	1.39e-19	0.818652	0.016	0.01	6.56e-05	0.393462	0.029	0.02	1	-0.97922	0.029	0.013	2.16e-07	-0.585758	0.013	0.02	9.31e-06	0.103501	0.02	0.018	1	-0.910828	0.02	0.008	5.89e-09	-0.807327	0.008	0.018	6.44e-10	-1.01516	0.039	0.014	1	0.241376	0.039	0.017	1	-0.77378	0.017	0.014	1	0.387136
Asb7	-0.111327	0.171	0.178	1	-0.209655	0.171	0.159	0.000406464	-0.320982	0.159	0.178	9.16e-16	-0.00402699	0.092	0.078	1	-0.439307	0.092	0.058	1.02e-10	-0.443334	0.058	0.078	0.000283482	0.170954	0.066	0.047	1	-0.145996	0.066	0.039	8.76e-15	0.0249576	0.039	0.047	0.0574126	-0.219305	0.098	0.099	1	0.0905855	0.098	0.082	1	-0.12872	0.082	0.099	1	1.40082
Asb8	0.12765	0.216	0.18	0.0485006	-0.112701	0.216	0.211	1	0.0149483	0.211	0.18	1	0.237206	0.024	0.021	1	-0.0869113	0.024	0.021	0.00629901	0.150294	0.021	0.021	0.702612	-0.613656	0.024	0.022	1	-0.156089	0.024	0.011	9.16e-13	-0.769745	0.011	0.022	4.39e-13	-1.12089	0.033	0.044	1	0.350604	0.033	0.016	1	-0.770285	0.016	0.044	1	0.0674456
Asb9
Ascc1	-0.0791489	0.191	0.195	1	-0.288418	0.191	0.168	1.03e-10	-0.367567	0.168	0.195	3.74e-16	0.374174	0.046	0.028	1	-0.0322966	0.046	0.034	9.23e-06	0.341877	0.034	0.028	1	0.0996521	0.07	0.056	1	-0.150019	0.07	0.044	1.22e-12	-0.0503665	0.044	0.056	5.94e-05	0.0330241	0.083	0.075	1	0.636811	0.083	0.082	1	0.669835	0.082	0.075	1	-0.435764
Ascc2	0.110593	0.139	0.12	1	-0.175115	0.139	0.132	0.000738689	-0.0645224	0.132	0.12	1	0.0281994	0.142	0.119	1	-0.331988	0.142	0.097	4.56e-13	-0.303789	0.097	0.119	0.00182679	0.0757127	0.106	0.094	1	-0.10858	0.106	0.071	5.89e-12	-0.0328676	0.071	0.094	1.66e-07	0.583832	0.152	0.095	1	-0.377319	0.152	0.074	0.677175	0.206513	0.074	0.095	1	0.563789
Ascc3	-0.155328	0.391	0.404	0.000277177	0.242785	0.391	0.449	1.32e-22	0.0874571	0.449	0.404	0.113036	-0.301798	0.45	0.442	1	0.267837	0.45	0.451	1	-0.0339607	0.451	0.442	1	-0.0791167	0.284	0.259	1	0.363126	0.284	0.259	1	0.28401	0.259	0.259	1	-0.495327	0.396	0.442	1	0.537946	0.396	0.376	1	0.0426197	0.376	0.442	1	-0.293297
Ascl1
Ascl2
Ascl3
Ascl4	0.669697	0.017	0.008	1	-0.108497	0.017	0.016	1	0.5612	0.016	0.008	1	0.506841	0.012	0.005	1	-0.324415	0.012	0.008	1
Ascl5
Asdurf
Asf1a	0.193087	0.041	0.034	1	-0.24395	0.041	0.033	1	-0.0508635	0.033	0.034	1	0.0589656	0.03	0.023	1	-0.0527076	0.03	0.023	1	0.00625798	0.023	0.023	1	-0.0230986	0.028	0.023	1	-0.214028	0.028	0.015	0.00102765	-0.237126	0.015	0.023	0.208999	1.99191	0.03	0.01	1	-0.841195	0.03	0.015	1	1.15071	0.015	0.01	1	-0.375243
Asf1b
Asgr1
Asgr2
Ash1l	0.0574173	0.74	0.726	1	-0.11261	0.74	0.772	1	-0.055193	0.772	0.726	1	-0.00279332	0.532	0.462	1	0.0796225	0.532	0.498	1	0.0768291	0.498	0.462	1	0.0922789	0.414	0.35	0.17106	0.256347	0.414	0.376	1	0.348626	0.376	0.35	1	0.1662	0.562	0.507	1	0.220837	0.562	0.565	1	0.387037	0.565	0.507	1	-0.0258377
Ash2l	0.0186291	0.141	0.132	1	-0.219651	0.141	0.126	1	-0.201022	0.126	0.132	1	0.159495	0.078	0.056	1	-0.215502	0.078	0.058	0.430118	-0.0560065	0.058	0.056	1	0.143431	0.064	0.048	1	-0.138992	0.064	0.037	9.3e-09	0.00443982	0.037	0.048	0.148905	0.0966963	0.08	0.065	1	0.356555	0.08	0.068	1	0.453251	0.068	0.065	1	1.12497
Asic1
Asic2	0.484809	0.015	0.013	1	-1.1078	0.015	0.007	0.0022052	-0.622987	0.007	0.013	1																									1.89533	0.015	0.007	1	-2.11133	0.015	0.003	1					-1.57483
Asic3
Asic4
Asic5
Asl													-0.526907	0.01	0.011	1	0.0448851	0.01	0.008	1	-0.482022	0.008	0.011	1	0.237729	0.016	0.012	1	-0.300344	0.016	0.009	1	-0.0626151	0.009	0.012	1
Asmt													0.197097	0.01	0.005	1	0.342547	0.01	0.007	1
Asna1	0.495508	0.037	0.026	1	-1.89744	0.037	0.01	8.48e-34	-1.40193	0.01	0.026	2.67e-14	0.509635	0.016	0.008	1	-1.1582	0.016	0.006	4.26e-05					0.0913883	0.014	0.013	1	-0.373582	0.014	0.007	0.00159028	-0.282194	0.007	0.013	0.0185195	1.37091	0.027	0.014	1	-0.0406318	0.027	0.016	1	1.33027	0.016	0.014	1	0.902121
Asns																									-0.670524	0.01	0.014	1	0.393422	0.01	0.009	1	-0.277102	0.009	0.014	1
Asnsd1	0.562818	0.016	0.012	1	-1.254	0.016	0.01	1	-0.691183	0.01	0.012	1	-0.306069	0.018	0.017	1	-0.202206	0.018	0.014	1	-0.508275	0.014	0.017	1	-0.0206785	0.011	0.01	1	-0.390918	0.011	0.008	1	-0.411597	0.008	0.01	1	-0.488249	0.006	0.014	1	1.40831	0.006	0.025	1	0.920059	0.025	0.014	1	-1.62064
Aspa													-0.0281441	0.213	0.187	1	-0.0300651	0.213	0.18	1	-0.0582092	0.18	0.187	1	-0.501235	0.018	0.022	1	0.825218	0.018	0.019	1	0.323984	0.019	0.022	1													-0.420836
Aspdh
Aspg													-0.610053	0.012	0.015	1	0.0283825	0.012	0.011	1	-0.581671	0.011	0.015	1
Asph	-0.204742	0.751	0.776	5.57e-33	0.142454	0.751	0.831	4e-33	-0.0622882	0.831	0.776	1	0.106905	0.263	0.199	1	0.444704	0.263	0.302	1	0.55161	0.302	0.199	1	3.39826	0.074	0.006	0.663246	0.530493	0.074	0.062	9.26e-23	3.92875	0.062	0.006	3.06e-06	0.421086	0.188	0.095	1	0.253234	0.188	0.154	1	0.674319	0.154	0.095	1	3.9305
Asphd1
Asphd2													0.398262	0.012	0.008	1	-1.28067	0.012	0.004	0.277364
Aspm
Aspn													1.18234	0.233	0.103	5.72e-50	-0.464137	0.233	0.14	5.89e-29	0.718205	0.14	0.103	0.000638556													2.37323	0.018	0.003	1	-3.26139	0.018	0.003	1
Asprv1
Aspscr1	0.444417	0.123	0.081	6.5e-11	-1.07444	0.123	0.064	1.55e-72	-0.630021	0.064	0.081	5.46e-21	0.190435	0.058	0.038	1	-0.558102	0.058	0.033	1.38e-11	-0.367667	0.033	0.038	0.134421	0.224862	0.048	0.036	1	-0.798136	0.048	0.022	3.06e-23	-0.573274	0.022	0.036	8.22e-11	-0.101201	0.042	0.031	1	0.164316	0.042	0.032	1	0.0631151	0.032	0.031	1	0.404396
Asrgl1	0.0670145	0.129	0.116	1	-0.0851414	0.129	0.118	1	-0.0181269	0.118	0.116	1	-0.156057	0.038	0.037	1	0.317648	0.038	0.038	1	0.161591	0.038	0.037	1	0.0102647	0.017	0.015	1	-0.055287	0.017	0.011	1	-0.0450223	0.011	0.015	0.200874	0.434664	0.045	0.027	1	0.0557239	0.045	0.032	1	0.490388	0.032	0.027	1
Ass1																									-0.458837	0.012	0.018	1	-0.158229	0.012	0.008	1	-0.617067	0.008	0.018	0.00681359	-0.724455	0.033	0.041	1	-0.930031	0.033	0.016	1	-1.65449	0.016	0.041	1	-0.278937
Aste1	0.580782	0.078	0.05	0.274042	-0.270666	0.078	0.072	1	0.310116	0.072	0.05	1	-0.326079	0.038	0.036	1	0.471075	0.038	0.042	1	0.144996	0.042	0.036	1	0.113332	0.033	0.026	1	0.0314365	0.033	0.026	1	0.144769	0.026	0.026	1	-2.25675	0.024	0.082	1	1.37562	0.024	0.042	1	-0.881135	0.042	0.082	1	1.89936
Astl
Astn1																																					4.19737	0.018	0	1	-0.709173	0.018	0.004	1
Astn2	1.23155	0.226	0.115	3.34e-100	0.0110987	0.226	0.221	1	1.24265	0.221	0.115	2.44e-82	-0.853061	0.098	0.126	1	1.19129	0.098	0.151	0.00078826	0.338228	0.151	0.126	1													-0.633362	0.345	0.422	1	0.415203	0.345	0.326	1	-0.218159	0.326	0.422	1	4.99889
Asxl1	0.0796488	0.507	0.474	1	-0.0317203	0.507	0.534	1	0.0479285	0.534	0.474	1	0.185526	0.31	0.236	8.08e-06	-0.153048	0.31	0.256	1.96e-11	0.0324782	0.256	0.236	1	-0.0250727	0.249	0.213	1	0.234068	0.249	0.216	0.00196013	0.208996	0.216	0.213	1	0.351702	0.455	0.337	1	0.134561	0.455	0.37	1	0.486263	0.37	0.337	1	0.209697
Asxl2	-0.0946837	0.488	0.49	1	0.0438413	0.488	0.516	1	-0.0508424	0.516	0.49	1	-0.0473084	0.235	0.201	1	0.348871	0.235	0.235	1	0.301563	0.235	0.201	1	-0.0144882	0.228	0.186	1	0.402783	0.228	0.192	0.00732845	0.388295	0.192	0.186	1	0.171323	0.354	0.337	1	0.120844	0.354	0.32	1	0.292167	0.32	0.337	1	0.00430093
Asxl3													-0.639027	0.031	0.039	1	1.46002	0.031	0.06	2e-06	0.820991	0.06	0.039	0.114209	-0.712276	0.092	0.118	0.06309	1.07454	0.092	0.115	0.000475161	0.362261	0.115	0.118	1	-1.12348	0.012	0.007	1	1.51339	0.012	0.009	1					0.0187364
Asz1
Atad1	-0.180787	0.293	0.302	0.0293527	0.222567	0.293	0.339	6.42e-10	0.0417803	0.339	0.302	1	0.157522	0.118	0.091	1	0.264764	0.118	0.121	1	0.422286	0.121	0.091	1	0.235429	0.069	0.052	1	0.0657023	0.069	0.046	1.51e-09	0.301131	0.046	0.052	0.00218816	0.120827	0.116	0.112	1	-0.0959722	0.116	0.073	1	0.0248548	0.073	0.112	1	1.076
Atad2	0.0532876	0.008	0.01	1	-0.252527	0.008	0.013	1	-0.199239	0.013	0.01	1	0.378667	0.067	0.042	1	-0.202563	0.067	0.047	0.104944	0.176104	0.047	0.042	1	0.0764114	0.069	0.057	1	-0.173526	0.069	0.045	6.92e-06	-0.0971142	0.045	0.057	1	0.514102	0.086	0.075	1	-0.673268	0.086	0.047	1	-0.159166	0.047	0.075	1	-0.287552
Atad2b	-0.194811	0.442	0.463	3.07e-11	0.132424	0.442	0.492	7.84e-09	-0.0623875	0.492	0.463	1	-0.137801	0.374	0.333	1	0.281983	0.374	0.385	1	0.144181	0.385	0.333	1	0.192788	0.362	0.29	0.000101409	0.11323	0.362	0.297	0.00828619	0.306018	0.297	0.29	1	0.431468	0.396	0.282	1	0.199196	0.396	0.346	1	0.630664	0.346	0.282	1	-0.162419
Atad3a	0.314908	0.394	0.305	3.07e-19	-0.731554	0.394	0.295	2.59e-101	-0.416646	0.295	0.305	1.55e-26	2.28304	0.017	0.002	1	0.492269	0.017	0.022	5.53e-11	2.77531	0.022	0.002	0.00481981					4.84837	0.001	0.012	1.24e-06	2.05479	0.012	0.002	7.79e-12	-0.975955	0.012	0.014	1	2.0955	0.012	0.026	1	1.11955	0.026	0.014	1	-0.760893
Atad5	-0.080002	0.048	0.049	1	-0.139411	0.048	0.048	1	-0.219413	0.048	0.049	1	0.0500301	0.038	0.024	1	-0.0128014	0.038	0.026	0.204022	0.0372287	0.026	0.024	1	0.583821	0.032	0.017	1	-0.725538	0.032	0.015	1.02e-10	-0.141717	0.015	0.017	1	0.68545	0.036	0.024	1	-0.869818	0.036	0.019	1	-0.184367	0.019	0.024	1	-1.06544
Atat1	0.11548	0.046	0.043	1	0.307914	0.046	0.067	0.00395596	0.423393	0.067	0.043	0.00447228	0.376716	0.049	0.033	1	-0.248172	0.049	0.038	1	0.128543	0.038	0.033	1	0.310015	0.03	0.019	1	-0.26721	0.03	0.017	1.62e-05	0.0428052	0.017	0.019	1	0.0732721	0.048	0.044	1	-0.120472	0.048	0.039	1	-0.0471995	0.039	0.044	1	0.11604
Atcay	-0.136756	0.046	0.049	6.55e-06	2.09676	0.046	0.189	2.26e-251	1.96001	0.189	0.049	1.78e-190
Ate1	0.211337	0.067	0.049	0.00066658	-0.682268	0.067	0.055	0.0337552	-0.470932	0.055	0.049	1	-0.00585645	0.047	0.037	1	-0.821851	0.047	0.027	1.2e-06	-0.827708	0.027	0.037	1	0.611831	0.031	0.016	0.87739	-0.315496	0.031	0.026	1	0.296335	0.026	0.016	1	0.132098	0.027	0.031	1	0.512758	0.027	0.044	1	0.644857	0.044	0.031	1	-0.523035
Atf1	0.23181	0.447	0.39	4.63e-08	-0.35251	0.447	0.414	3.64e-20	-0.120701	0.414	0.39	1	0.694833	0.137	0.069	2.43e-09	-0.0948359	0.137	0.108	1.98e-09	0.599997	0.108	0.069	1	0.417885	0.097	0.061	1	0.0184712	0.097	0.07	5.58e-13	0.436356	0.07	0.061	0.851689	0.226038	0.211	0.167	1	-0.908397	0.211	0.093	0.0012276	-0.682359	0.093	0.167	1	0.118261
Atf2	0.0347029	0.325	0.31	1	0.332392	0.325	0.399	3.45e-35	0.367095	0.399	0.31	2.76e-35	-0.170702	0.264	0.247	1	0.531435	0.264	0.305	0.00606303	0.360733	0.305	0.247	0.041334	0.130471	0.197	0.158	1	0.351572	0.197	0.17	1	0.482043	0.17	0.158	1	-0.0551127	0.28	0.282	1	0.346551	0.28	0.293	1	0.291439	0.293	0.282	1	0.629031
Atf3					3.36417	0.009	0.086	1.05e-195	5.28558	0.086	0.003	2.77e-247																	4.90883	0.005	0.066	1.82e-60	4.61817	0.066	0.004	6.78e-61	-1.2109	0.012	0.02	1	0.0167393	0.012	0.006	1	-1.19416	0.006	0.02	1
Atf4	1.04619	0.091	0.045	1	-1.34124	0.091	0.042	1.95e-41	-0.295044	0.042	0.045	7.66e-21	0.0996252	0.087	0.063	1	0.519281	0.087	0.102	1	0.618907	0.102	0.063	1	0.817792	0.07	0.044	1	0.838383	0.07	0.077	1	1.65618	0.077	0.044	1	-0.249216	0.054	0.065	1	0.234011	0.054	0.047	1	-0.0152055	0.047	0.065	1	-0.286711
Atf5													-0.887659	0.106	0.15	6.82e-07	-0.0628472	0.106	0.085	1	-0.950506	0.085	0.15	1.31e-24	0.140063	0.021	0.019	1	-0.365924	0.021	0.007	1.55e-07	-0.225862	0.007	0.019	1.03e-08	-2.07865	0.009	0.014	1					-1.58053	0.006	0.014	1
Atf6	-0.398058	0.56	0.622	7.9e-59	0.24152	0.56	0.64	4.35e-33	-0.156538	0.64	0.622	0.000715778	0.0145326	0.153	0.119	1	0.381974	0.153	0.167	1	0.396506	0.167	0.119	1	0.462877	0.146	0.097	1	0.363635	0.146	0.126	8.28e-08	0.826512	0.126	0.097	1	0.0133896	0.244	0.19	1	0.332439	0.244	0.208	1	0.345829	0.208	0.19	1	0.144766
Atf6b	0.675255	0.023	0.013	1	-1.79945	0.023	0.007	0.00954322	-1.12419	0.007	0.013	1	0.0310637	0.015	0.014	1	0.101815	0.015	0.014	1	0.132879	0.014	0.014	1	0.284749	0.025	0.019	1	-0.360707	0.025	0.012	0.0129586	-0.0759574	0.012	0.019	1	0.254171	0.015	0.02	1	0.169537	0.015	0.015	1	0.423708	0.015	0.02	1	1.92325
Atf7	0.294899	0.305	0.242	2.14e-22	0.318263	0.305	0.48	8.9e-128	0.613162	0.48	0.242	1.25e-276	0.123979	0.353	0.271	3.06e-05	0.353635	0.353	0.439	4.91e-09	0.477614	0.439	0.271	1.28e-37	0.301182	0.188	0.123	4.94e-11	0.764614	0.188	0.319	1.99e-54	1.0658	0.319	0.123	2.14e-123	0.228232	0.253	0.204	1	0.902212	0.253	0.459	0.000134868	1.13044	0.459	0.204	5.73e-08	-0.115826
Atf7ip	-0.216646	0.567	0.586	6.17e-17	0.344188	0.567	0.664	1.5e-75	0.127541	0.664	0.586	2.05e-13	-0.239255	0.374	0.334	1	0.11383	0.374	0.338	1	-0.125425	0.338	0.334	1	0.068966	0.342	0.282	1	-0.124786	0.342	0.232	7.66e-27	-0.0558203	0.232	0.282	1.31e-10	-0.429854	0.387	0.395	1	0.258977	0.387	0.355	1	-0.170877	0.355	0.395	1	0.355099
Atf7ip2
Atg10	-0.241999	0.595	0.621	8.47e-21	0.53195	0.595	0.73	5.68e-163	0.28995	0.73	0.621	5.52e-56	-0.00761892	0.213	0.169	1	0.657599	0.213	0.249	1	0.64998	0.249	0.169	0.00279246	0.808254	0.125	0.061	0.000644827	0.157128	0.125	0.096	7.82e-13	0.965382	0.096	0.061	1	0.181118	0.223	0.146	1	0.735234	0.223	0.22	1	0.916352	0.22	0.146	1	0.480026
Atg101	1.75203	0.019	0.007	1	-1.84493	0.019	0.005	0.247874					-0.19964	0.016	0.013	1	0.912961	0.016	0.021	1	0.71332	0.021	0.013	1	0.45028	0.023	0.017	1	0.353195	0.023	0.017	1	0.803475	0.017	0.017	1					2.1629	0.009	0.022	1	1.82258	0.022	0.007	1	-1.27926
Atg12	-0.0139125	0.077	0.077	1	-0.138275	0.077	0.077	1	-0.152187	0.077	0.077	1	-0.411015	0.045	0.045	1	0.189762	0.045	0.041	1	-0.221253	0.041	0.045	1	-0.479546	0.047	0.053	1	0.319026	0.047	0.032	0.00443895	-0.16052	0.032	0.053	1.79e-08	-0.149295	0.051	0.044	1	0.768843	0.051	0.052	1	0.619547	0.052	0.044	1	0.341182
Atg13	0.23296	0.273	0.231	9.66e-05	-0.380914	0.273	0.237	3.33e-19	-0.147954	0.237	0.231	1	-0.539231	0.058	0.059	1	0.189921	0.058	0.052	0.00150859	-0.34931	0.052	0.059	0.00766974	0.0563277	0.054	0.04	1	-0.163977	0.054	0.03	2.58e-21	-0.107649	0.03	0.04	4.95e-11	0.235764	0.077	0.051	1	-0.112165	0.077	0.049	1	0.1236	0.049	0.051	1	-0.0550083
Atg14	0.305979	0.083	0.078	1	-0.822565	0.083	0.052	4.92e-31	-0.516586	0.052	0.078	1.12e-26	0.0898494	0.055	0.046	1	-0.52994	0.055	0.03	2.74e-10	-0.440091	0.03	0.046	0.000537707	-0.0945901	0.045	0.04	1	-0.391107	0.045	0.021	1.91e-14	-0.485697	0.021	0.04	5.74e-11	0.983092	0.039	0.034	1	-0.514647	0.039	0.029	1	0.468446	0.029	0.034	1	0.282504
Atg16l1	0.267674	0.215	0.179	1	-0.196712	0.215	0.217	0.822257	0.0709626	0.217	0.179	1	0.331235	0.153	0.103	0.280615	-0.105852	0.153	0.121	9.6e-07	0.225382	0.121	0.103	1	0.161534	0.14	0.116	1	0.0644032	0.14	0.108	1.56e-09	0.225937	0.108	0.116	1	0.0411867	0.185	0.153	1	-0.35027	0.185	0.109	1	-0.309084	0.109	0.153	1	-0.0854296
Atg16l2	0.253756	0.168	0.141	1	-0.0776778	0.168	0.178	1	0.176078	0.178	0.141	1	0.0849758	0.156	0.116	0.0481636	0.193829	0.156	0.145	1	0.278805	0.145	0.116	1	0.221991	0.076	0.055	1	0.170237	0.076	0.061	0.0392898	0.392228	0.061	0.055	1	-0.120907	0.149	0.146	1	0.233767	0.149	0.116	1	0.11286	0.116	0.146	1	-0.475034
Atg2a	0.319628	0.135	0.099	4.74e-12	-0.501491	0.135	0.1	6.5e-23	-0.181862	0.1	0.099	1	0.303724	0.045	0.027	0.112838	-0.0557267	0.045	0.032	1.21e-05	0.247997	0.032	0.027	1	-0.164661	0.034	0.028	1	0.33474	0.034	0.027	0.000107402	0.170079	0.027	0.028	1	-0.0841726	0.036	0.041	1	-0.169057	0.036	0.025	1	-0.25323	0.025	0.041	1	-0.956151
Atg2b	0.0931639	0.205	0.191	1	-0.478378	0.205	0.162	2.27e-22	-0.385214	0.162	0.191	5.51e-22	0.243582	0.118	0.085	1	-0.374899	0.118	0.081	1.71e-10	-0.131317	0.081	0.085	1	-0.0709915	0.086	0.073	1	0.0461216	0.086	0.057	1.34e-09	-0.0248699	0.057	0.073	1.82e-05	0.257171	0.113	0.102	1	0.213241	0.113	0.09	1	0.470412	0.09	0.102	1	-0.107961
Atg3	-0.0444064	0.137	0.14	1	0.248185	0.137	0.169	4.8e-05	0.203778	0.169	0.14	0.273966	0.134492	0.204	0.155	0.0230098	-0.105978	0.204	0.159	2.8e-05	0.0285142	0.159	0.155	1	0.118049	0.113	0.091	1	-0.0790216	0.113	0.07	3.24e-14	0.039027	0.07	0.091	0.00124555	0.0815526	0.217	0.19	1	0.0910254	0.217	0.166	1	0.172578	0.166	0.19	1	0.0959396
Atg4a	0.0546206	0.035	0.036	1	0.266176	0.035	0.043	1	0.320797	0.043	0.036	1	-0.19559	0.048	0.043	1	0.298261	0.048	0.043	1	0.102671	0.043	0.043	1	-0.076429	0.098	0.084	1	0.384832	0.098	0.081	1	0.308403	0.081	0.084	1	-0.614889	0.068	0.082	1	1.0258	0.068	0.068	1	0.410907	0.068	0.082	1	-0.845761
Atg4a-ps
Atg4b	0.101409	0.136	0.122	1	0.00803265	0.136	0.145	1	0.109442	0.145	0.122	1	0.143603	0.102	0.077	1	-0.0227502	0.102	0.084	1	0.120853	0.084	0.077	1	-0.276476	0.069	0.066	1	0.519214	0.069	0.065	1	0.242739	0.065	0.066	1	0.0273296	0.113	0.112	1	-0.195014	0.113	0.067	1	-0.167684	0.067	0.112	1	-0.240353
Atg4c	-0.287438	0.122	0.136	1	0.106019	0.122	0.133	1	-0.181419	0.133	0.136	0.00159614	0.0367491	0.091	0.077	1	-0.107595	0.091	0.073	0.0160201	-0.0708463	0.073	0.077	1	0.126179	0.048	0.034	1	0.160586	0.048	0.036	0.0148061	0.286766	0.036	0.034	1	-0.135344	0.11	0.102	1	-0.250656	0.11	0.066	1	-0.386	0.066	0.102	1	0.895301
Atg4d	0.190966	0.113	0.09	1	-0.570698	0.113	0.089	5.09e-12	-0.379732	0.089	0.09	1	-0.0286495	0.038	0.029	1	-0.566975	0.038	0.022	7.07e-10	-0.595624	0.022	0.029	0.000307292	0.29975	0.03	0.021	1	-0.54876	0.03	0.014	1.52e-08	-0.24901	0.014	0.021	2.86e-05	-0.252525	0.039	0.048	1	0.00378088	0.039	0.025	1	-0.248744	0.025	0.048	1	2.14417
Atg5	-0.0170325	0.196	0.191	1	-0.105658	0.196	0.189	1	-0.12269	0.189	0.191	0.144139	-0.182039	0.12	0.104	1	-0.196461	0.12	0.082	1.68e-09	-0.3785	0.082	0.104	0.000776548	-0.00477251	0.102	0.09	1	-0.00290723	0.102	0.067	4.32e-12	-0.00767975	0.067	0.09	1.63e-07	-0.842487	0.083	0.119	1	1.08068	0.083	0.095	1	0.238193	0.095	0.119	1	0.120866
Atg7	0.188156	0.172	0.15	1	-0.283379	0.172	0.156	6.08e-07	-0.0952237	0.156	0.15	1	-0.0926507	0.163	0.135	1	-0.29983	0.163	0.113	2.67e-11	-0.392481	0.113	0.135	0.00922891	0.218839	0.116	0.087	1	-0.0570405	0.116	0.077	1.2e-11	0.161799	0.077	0.087	1	0.0047034	0.155	0.17	1	0.237435	0.155	0.141	1	0.242138	0.141	0.17	1	-0.246231
Atg9a	0.31212	0.113	0.084	2.62e-05	-0.921857	0.113	0.069	4.55e-32	-0.609737	0.069	0.084	1.54e-05	0.0243123	0.048	0.04	1	-0.629719	0.048	0.027	5.28e-09	-0.605407	0.027	0.04	0.254269	0.177944	0.038	0.033	1	-0.0504737	0.038	0.025	1.45e-08	0.127471	0.025	0.033	0.0306607	1.2529	0.036	0.01	1	0.308909	0.036	0.031	1	1.56181	0.031	0.01	1	1.56629
Atg9b																																																	-2.48939
Atic	0.021345	0.029	0.032	1	-0.138381	0.029	0.028	1	-0.117035	0.028	0.032	1	0.138447	0.055	0.042	1	-0.359786	0.055	0.037	0.218609	-0.221338	0.037	0.042	1	-0.172761	0.014	0.013	1	-0.450108	0.014	0.008	1	-0.622869	0.008	0.013	1	-0.75316	0.018	0.031	1	0.271114	0.018	0.016	1	-0.482045	0.016	0.031	1	-1.2296
Atl1	-0.0961141	0.126	0.123	1	0.106813	0.126	0.136	1	0.0106993	0.136	0.123	1	-0.440365	0.027	0.032	1	0.930517	0.027	0.041	1	0.490152	0.041	0.032	1	0.245706	0.083	0.057	1	-0.14358	0.083	0.05	5.18e-11	0.102126	0.05	0.057	1	-0.251692	0.074	0.088	1	-0.0131873	0.074	0.049	1	-0.264879	0.049	0.088	1	-0.295397
Atl2	-0.0122059	0.289	0.288	1	0.201574	0.289	0.341	6.6e-17	0.189368	0.341	0.288	4.13e-09	0.482282	0.086	0.047	0.00520752	0.4162	0.086	0.092	1	0.898482	0.092	0.047	0.0963966	0.143401	0.075	0.051	1	0.908819	0.075	0.08	1	1.05222	0.08	0.051	1	-0.492035	0.312	0.395	1	0.515389	0.312	0.336	1	0.0233539	0.336	0.395	1	0.0313132
Atl3	0.0724219	0.112	0.108	1	-0.464144	0.112	0.089	7.08e-10	-0.391722	0.089	0.108	3.61e-23	-0.0185894	0.264	0.221	1	-0.388889	0.264	0.187	1.41e-16	-0.407478	0.187	0.221	7.5e-06	-0.115677	0.14	0.116	1	-0.0862674	0.14	0.089	2.52e-16	-0.201945	0.089	0.116	7.77e-07	0.0803791	0.202	0.167	1	0.12367	0.202	0.15	1	0.204049	0.15	0.167	1	-0.34357
Atm	0.071563	0.224	0.196	1	-0.199794	0.224	0.191	6.68e-09	-0.128231	0.191	0.196	0.0069594	-0.193796	0.102	0.087	1	0.224073	0.102	0.09	1	0.0302767	0.09	0.087	1	0.214355	0.082	0.063	1	-0.238536	0.082	0.049	1.67e-14	-0.0241811	0.049	0.063	2.02e-06	-0.389155	0.122	0.126	1	0.430714	0.122	0.1	1	0.0415583	0.1	0.126	1	-0.313481
Atmin	0.333934	0.021	0.019	1	-1.81342	0.021	0.007	5.88e-12	-1.47949	0.007	0.019	2.73e-13	-0.323685	0.026	0.021	1	-0.934533	0.026	0.009	6.08e-06	-1.25822	0.009	0.021	0.00240985	0.0557535	0.026	0.019	1	-0.918441	0.026	0.008	1.09e-15	-0.862687	0.008	0.019	6.32e-05	0.0228761	0.021	0.017	1	-1.75178	0.021	0.006	1	-1.7289	0.006	0.017	1
Atn1	-0.0355115	0.041	0.032	1	-0.690331	0.041	0.035	1	-0.725843	0.035	0.032	1	0.378098	0.105	0.063	5.92e-05	-0.787345	0.105	0.063	1.32e-12	-0.409247	0.063	0.063	1	0.644226	0.017	0.009	1	0.216975	0.017	0.023	1	0.861201	0.023	0.009	0.0546454	0.207048	0.057	0.051	1	-0.262165	0.057	0.064	1	-0.0551169	0.064	0.051	1	-1.01829
Atoh1
Atoh7
Atoh8	-0.015785	0.025	0.023	0.0113123	-0.783531	0.025	0.016	1.92e-18	-0.799316	0.016	0.023	0.239065													0.219483	0.05	0.031	0.175908	-0.809273	0.05	0.019	1.19e-27	-0.589791	0.019	0.031	0.0003577	-0.588273	0.024	0.027	1	0.266833	0.024	0.023	1	-0.32144	0.023	0.027	1	-0.283224
Atox1													-0.121184	0.029	0.026	1	-1.42616	0.029	0.01	0.000966813	-1.54734	0.01	0.026	0.0994781	-0.227341	0.069	0.075	1	-0.157466	0.069	0.042	1.62e-07	-0.384808	0.042	0.075	3.26e-10	-0.579915	0.03	0.031	1	-0.474923	0.03	0.017	1	-1.05484	0.017	0.031	1	-0.933061
Atp10a													0.0311465	0.276	0.229	1	-0.0320838	0.276	0.225	0.0765121	-0.00093738	0.225	0.229	1	-0.382398	0.014	0.013	1	-0.202387	0.014	0.008	0.145693	-0.584785	0.008	0.013	1	1.03899	0.155	0.105	1	-0.468621	0.155	0.102	1	0.57037	0.102	0.105	1	-0.359571
Atp10b
Atp11a	-0.0653689	0.396	0.391	1	-0.475361	0.396	0.331	1.16e-51	-0.54073	0.331	0.391	2.88e-74	-0.142004	0.144	0.117	1	0.0592909	0.144	0.125	8.57e-05	-0.0827127	0.125	0.117	1	0.050541	0.09	0.074	1	-0.0057659	0.09	0.067	3.05e-15	0.0447751	0.067	0.074	8.76e-11	0.30098	0.223	0.187	1	-0.13384	0.223	0.16	1	0.16714	0.16	0.187	1	0.165029
Atp11b	-0.00381151	0.254	0.244	1	0.0798606	0.254	0.271	1	0.0760491	0.271	0.244	1	-0.0980316	0.165	0.144	1	0.313527	0.165	0.171	1	0.215495	0.171	0.144	1	0.0126764	0.153	0.13	1	0.289524	0.153	0.122	0.0504636	0.3022	0.122	0.13	1	-0.158428	0.205	0.197	1	0.197671	0.205	0.163	1	0.0392427	0.163	0.197	1	0.360419
Atp11c	-0.0160305	0.283	0.274	1	0.184323	0.283	0.315	0.258296	0.168293	0.315	0.274	0.271843	-0.0789409	0.223	0.197	1	0.343069	0.223	0.237	1	0.264128	0.237	0.197	1	-0.126449	0.281	0.271	1	0.519656	0.281	0.285	1	0.393207	0.285	0.271	1	-0.331076	0.289	0.272	1	0.828107	0.289	0.338	1	0.49703	0.338	0.272	1	-0.294478
Atp12a
Atp13a1	0.343924	0.082	0.061	1	-1.06304	0.082	0.046	5.62e-35	-0.719119	0.046	0.061	3.67e-17	0.139503	0.056	0.041	1	-0.209151	0.056	0.038	7.57e-05	-0.0696479	0.038	0.041	1	0.201048	0.062	0.042	1	-0.370301	0.062	0.032	1.41e-17	-0.169253	0.032	0.042	0.00750661	0.467957	0.083	0.061	1	0.0677366	0.083	0.039	1	0.535694	0.039	0.061	1	1.62086
Atp13a2	0.379218	0.033	0.018	1	-1.11671	0.033	0.017	6.42e-20	-0.737495	0.017	0.018	5.49e-10	1.93059	0.014	0.004	1	-0.195098	0.014	0.008	0.00347892					0.437359	0.029	0.019	1	-0.7628	0.029	0.012	1.09e-15	-0.325442	0.012	0.019	5.54e-05	0.663404	0.039	0.014	1	0.12739	0.039	0.028	1	0.790794	0.028	0.014	1	0.734084
Atp13a3	-0.291844	0.138	0.167	0.0214427	0.323555	0.138	0.174	0.0326289	0.0317104	0.174	0.167	1	0.218815	0.238	0.174	2.7e-06	0.437388	0.238	0.259	1	0.656203	0.259	0.174	2.27e-16	-0.26705	0.101	0.097	1	0.596387	0.101	0.097	1	0.329336	0.097	0.097	1	-0.83097	0.107	0.129	1	0.816721	0.107	0.115	1	-0.0142493	0.115	0.129	1	-0.451958
Atp13a4
Atp13a5
Atp1a1	0.197084	0.687	0.627	5.18e-08	-0.242528	0.687	0.679	9.95e-08	-0.0454449	0.679	0.627	1	-0.519751	0.019	0.02	1	-1.98957	0.019	0.002	3.58e-17	-2.50932	0.002	0.02	3.48e-39	-1.04934	0.061	0.081	3.5e-09	0.257043	0.061	0.034	5.12e-13	-0.792292	0.034	0.081	1.14e-66	-0.115736	0.068	0.054	1	0.318127	0.068	0.038	1	0.202391	0.038	0.054	1	-1.38357
Atp1a2	-0.050976	0.572	0.59	0.00186496	-0.0931965	0.572	0.604	1	-0.144172	0.604	0.59	1	0.0465133	0.382	0.324	1	-0.0802275	0.382	0.322	6.79e-07	-0.0337142	0.322	0.324	1																									6.2123
Atp1a3
Atp1a4
Atp1b1	-0.18298	0.35	0.377	3.84e-09	0.256091	0.35	0.412	2.81e-34	0.0731107	0.412	0.377	0.00625407													0.515302	0.016	0.011	1	-10.4746	0.016	0	3.37e-30	-9.95929	0	0.011	2.04e-42	0.455846	0.027	0.02	1	-1.90423	0.027	0.004	1	-1.44838	0.004	0.02	1	-1.02771
Atp1b2
Atp1b3	-0.344517	0.102	0.123	0.00664533	0.197518	0.102	0.118	1	-0.146998	0.118	0.123	1	0.174249	0.104	0.082	1	0.162502	0.104	0.1	1	0.336751	0.1	0.082	1	-0.0443997	0.114	0.104	1	0.135963	0.114	0.084	2.77e-06	0.0915634	0.084	0.104	0.187169	-0.269454	0.512	0.534	1	0.376169	0.512	0.518	1	0.106715	0.518	0.534	1	0.157145
Atp1b4
Atp23	-0.0463545	0.037	0.039	1	-0.217329	0.037	0.032	1	-0.263684	0.032	0.039	0.206327	0.682822	0.015	0.01	1	-0.133614	0.015	0.012	1	0.549208	0.012	0.01	1													-0.860798	0.015	0.017	1	-0.504192	0.015	0.004	1	-1.36499	0.004	0.017	1
Atp2a1
Atp2a2	-0.33057	0.969	0.974	5.4e-249	0.291992	0.969	0.976	1.98e-226	-0.0385777	0.976	0.974	0.409081	10.0855	0.047	0	0.151629	-0.945049	0.047	0.013	1.49e-76	9.14044	0.013	0	1.62e-53	3.4064	0.099	0.009	1	-13.4429	0.099	0	4.36e-199					7.54487	0.08	0	1	-8.76937	0.08	0	1.56e-10					3.31552
Atp2a3													0.185931	0.017	0.011	1	-0.773813	0.017	0.008	0.652172	-0.587882	0.008	0.011	1													1.16967	0.012	0.01	1	-0.371952	0.012	0.009	1	0.797721	0.009	0.01	1	-0.345989
Atp2b1	-0.158181	0.397	0.417	1.18e-05	0.217436	0.397	0.467	2.56e-18	0.0592547	0.467	0.417	1	0.188669	0.357	0.269	2.89e-06	0.130923	0.357	0.337	1	0.319592	0.337	0.269	1	-0.00582239	0.351	0.313	1	0.321668	0.351	0.318	1	0.315846	0.318	0.313	1	0.307152	0.372	0.33	1	-0.0238347	0.372	0.338	1	0.283317	0.338	0.33	1	0.18265
Atp2b2	-0.864963	0.009	0.014	1	0.0380517	0.009	0.012	1	-0.826911	0.012	0.014	1																																					0.750619
Atp2b3					0.480322	0.005	0.01	0.177832	0.572134	0.01	0.007	1
Atp2b4													0.0745081	0.219	0.184	1	0.0266883	0.219	0.196	1	0.101196	0.196	0.184	1	-0.0328957	0.229	0.207	1	-0.132599	0.229	0.155	9.21e-18	-0.165494	0.155	0.207	5.3e-07	-0.179236	0.479	0.486	1	0.160464	0.479	0.457	1	-0.018772	0.457	0.486	1	-0.25651
Atp2c1	0.0766254	0.524	0.5	1	-0.30602	0.524	0.479	2.93e-29	-0.229394	0.479	0.5	8.9e-22	0.0969749	0.218	0.158	0.0903552	0.0239217	0.218	0.181	9.02e-05	0.120897	0.181	0.158	1	0.200007	0.168	0.125	1	0.137079	0.168	0.132	2.01e-10	0.337086	0.132	0.125	1	0.0708193	0.283	0.224	1	0.3561	0.283	0.301	1	0.426919	0.301	0.224	1	0.0638012
Atp2c2
Atp4a
Atp4b
Atp5a1	0.409032	0.564	0.445	9.94e-28	-1.58588	0.564	0.285	0	-1.17685	0.285	0.445	1.26e-193	-1.10764	0.045	0.066	1	-2.08665	0.045	0.006	9.43e-47	-3.19429	0.006	0.066	8.45e-68	-0.397254	0.157	0.18	4.78e-08	-0.257602	0.157	0.08	3.94e-20	-0.654856	0.08	0.18	2.06e-76	-0.524976	0.107	0.116	1	-1.42166	0.107	0.012	1	-1.94664	0.012	0.116	0.010492	-1.29856
Atp5b	0.789636	0.312	0.188	7.82e-41	-2.05906	0.312	0.109	2.28e-127	-1.26942	0.109	0.188	2.53e-16	-0.903149	0.087	0.14	1.56e-05	-2.38354	0.087	0.015	2.18e-19	-3.28669	0.015	0.14	5.42e-62	-0.526029	0.212	0.269	1.71e-16	-0.145297	0.212	0.122	0.000123656	-0.671326	0.122	0.269	5.02e-63	-0.514819	0.137	0.204	1	-1.22393	0.137	0.042	1	-1.73875	0.042	0.204	0.0293404	-0.930658
Atp5c1	0.109129	0.486	0.453	1	-0.648183	0.486	0.375	2.76e-43	-0.539054	0.375	0.453	9.24e-41	0.230934	0.107	0.093	1	-1.21942	0.107	0.039	4.68e-22	-0.98849	0.039	0.093	2.3e-18	-0.217826	0.135	0.145	0.635786	-0.329054	0.135	0.071	7.99e-16	-0.54688	0.071	0.145	5.84e-44	0.48669	0.185	0.139	1	-1.4279	0.185	0.049	0.139005	-0.94121	0.049	0.139	1	-0.300285
Atp5d	1.47141	0.241	0.063	3.62e-62	-3.92151	0.241	0.022	0	-2.4501	0.022	0.063	1.09e-224	-0.175953	0.061	0.067	1	-1.37026	0.061	0.018	9.01e-25	-1.54621	0.018	0.067	8.55e-50	-0.724983	0.112	0.152	2.73e-15	7.14e-07	0.112	0.074	2.37e-10	-0.724983	0.074	0.152	1.7e-77	-1.58159	0.071	0.105	1	-1.09658	0.071	0.016	1	-2.67816	0.016	0.105	4.32e-07	-1.21022
Atp5e	1.3434	0.019	0.004	1	-11.6156	0.019	0	1.2e-12					-0.78875	0.044	0.067	0.0283911	-3.60691	0.044	0.003	2.05e-10	-4.39566	0.003	0.067	6.62e-38	-0.474619	0.143	0.169	0.000714868	-0.159074	0.143	0.085	1	-0.633692	0.085	0.169	3.37e-22	0.509528	0.11	0.095	1	-3.59912	0.11	0.012	1	-3.08959	0.012	0.095	1	-1.05175
Atp5f1	0.223787	0.405	0.355	1	-0.877844	0.405	0.253	3.35e-36	-0.654058	0.253	0.355	3.08e-28	-0.298636	0.078	0.086	1	-2.12181	0.078	0.015	1.14e-17	-2.42044	0.015	0.086	1.81e-23	-0.496256	0.12	0.146	3.74e-07	-0.666486	0.12	0.048	4.17e-09	-1.16274	0.048	0.146	2.84e-53	0.0185376	0.19	0.167	1	-2.65311	0.19	0.023	0.0845825	-2.63457	0.023	0.167	0.00520982	-1.26292
Atp5g1	1.27062	0.089	0.025	1	-7.08626	0.089	0	4.31e-65	-5.81564	0	0.025	4.77e-90	0.44347	0.068	0.066	1	-4.30685	0.068	0.003	4.53e-20	-3.86338	0.003	0.066	1.6e-50	-0.562096	0.111	0.166	1.57e-25	-0.284132	0.111	0.063	1	-0.846228	0.063	0.166	1.07e-65	0.962393	0.098	0.082	1	-3.74845	0.098	0.003	1	-2.78605	0.003	0.082	1	0.0577553
Atp5g2	0.436871	0.14	0.096	1	-1.17805	0.14	0.074	1	-0.741176	0.074	0.096	1	0.331396	0.04	0.027	1	-1.64888	0.04	0.012	1	-1.31748	0.012	0.027	1	-0.125459	0.078	0.077	1	-0.056564	0.078	0.047	1	-0.182023	0.047	0.077	1.67e-06	0.0733308	0.083	0.061	1	0.0964728	0.083	0.048	1	0.169804	0.048	0.061	1	-0.297377
Atp5g3	1.36384	0.063	0.015	1	-6.02868	0.063	0	1	-4.66484	0	0.015	0.114623	-0.964317	0.063	0.113	0.0019396	-0.0297728	0.063	0.034	1	-0.994089	0.034	0.113	5.61e-05	-0.641153	0.162	0.205	1.79e-14	0.626294	0.162	0.139	9.27e-08	-0.0148593	0.139	0.205	1	-0.250043	0.122	0.173	1	-0.92832	0.122	0.036	1	-1.17836	0.036	0.173	0.259032	-1.04523
Atp5h	0.803252	0.173	0.1	0.810039	-3.23077	0.173	0.033	1.72e-18	-2.42752	0.033	0.1	0.000921446	-0.385494	0.111	0.121	1	-1.74516	0.111	0.023	1.62e-07	-2.13066	0.023	0.121	5.9e-16	-0.376255	0.147	0.172	0.000260857	0.116871	0.147	0.111	1	-0.259384	0.111	0.172	0.652613	-1.01059	0.086	0.099	1	0.365357	0.086	0.073	1	-0.645234	0.073	0.099	1	-1.12207
Atp5j	1.14384	0.135	0.084	1	-1.93063	0.135	0.054	1	-0.786792	0.054	0.084	1	0.0619595	0.069	0.059	1	-3.66301	0.069	0.006	1.28e-16	-3.60105	0.006	0.059	1.22e-30	-0.220599	0.161	0.169	1	-0.189953	0.161	0.096	3.71e-05	-0.410552	0.096	0.169	2.74e-20	-1.25715	0.089	0.163	1	-0.31403	0.089	0.052	1	-1.57118	0.052	0.163	0.46261	-0.196853
Atp5j2	1.73736	0.073	0.036	1	-4.63105	0.073	0.004	1.31e-17	-2.89369	0.004	0.036	1.92e-22	-0.513087	0.074	0.098	0.249262	-1.39939	0.074	0.017	2.87e-08	-1.91248	0.017	0.098	2.08e-31	-0.77338	0.142	0.208	9.86e-19	0.143357	0.142	0.1	1	-0.630023	0.1	0.208	1.3e-23	0.19025	0.149	0.112	1	-1.17749	0.149	0.042	1	-0.987244	0.042	0.112	1	-0.421753
Atp5k	1.97946	0.042	0.005	1	-6.99353	0.042	0	0.0567002					0.0906376	0.123	0.106	1	-1.75524	0.123	0.021	6.58e-13	-1.6646	0.021	0.106	1.41e-13	-0.629295	0.15	0.203	2.54e-12	0.285214	0.15	0.12	0.261204	-0.344081	0.12	0.203	0.000405554	-0.174134	0.113	0.146	1	-0.576365	0.113	0.052	1	-0.750499	0.052	0.146	1	-0.324007
Atp5l	0.559866	0.316	0.234	1.18e-09	-1.45977	0.316	0.133	4.6e-20	-0.899901	0.133	0.234	1	0.129015	0.045	0.044	1	-1.70496	0.045	0.012	1	-1.57595	0.012	0.044	1	-0.162939	0.106	0.112	1	0.438364	0.106	0.088	0.173956	0.275425	0.088	0.112	1	-0.783451	0.062	0.075	1	-0.925841	0.062	0.025	1	-1.70929	0.025	0.075	1	0.0135378
Atp5md	1.52333	0.099	0.026	1.8e-58	-2.31977	0.099	0.038	1.59e-10	-0.796439	0.038	0.026	6.38e-159													1.23506	0.017	0.005	1	-0.109959	0.017	0.015	5.69e-12	1.1251	0.015	0.005	1.32e-30	-5.46615	0	0.017	1					-1.33195	0.007	0.017	1	-0.172898
Atp5mpl	2.55276	0.036	0.002	4.31e-27	-2.94254	0.036	0.014	1	-0.389774	0.014	0.002	3.39e-40	9.50939	0.025	0	1	-5.54509	0.025	0.001	1					0.556798	0.04	0.022	1	-0.0709045	0.04	0.037	2.74e-07	0.485893	0.037	0.022	5.93e-17	-6.37733	0	0.017	1					-2.33079	0.003	0.017	1	2.16361
Atp5o	0.75832	0.056	0.082	1	-8.88659	0.056	0	2.73e-49	-8.12827	0	0.082	7.79e-64	0.48449	0.059	0.048	1	-10.9127	0.059	0	1.27e-32	-10.4282	0	0.048	6.04e-28	0.226285	0.081	0.05	1	-0.827503	0.081	0.039	1	-0.601218	0.039	0.05	1	0.0597505	0.089	0.068	1	-3.47388	0.089	0.003	1	-3.41413	0.003	0.068	1	-1.97674
Atp6ap1	0.0884052	0.094	0.097	1	-0.557607	0.094	0.078	0.806509	-0.469201	0.078	0.097	1	0.0998789	0.056	0.045	1	-0.102406	0.056	0.048	1	-0.0025272	0.048	0.045	1	-0.221316	0.046	0.04	1	0.306223	0.046	0.036	1	0.084907	0.036	0.04	1	-1.04162	0.045	0.071	1	1.1248	0.045	0.063	1	0.0831813	0.063	0.071	1	-0.334423
Atp6ap1l
Atp6ap2	0.18546	0.041	0.043	1	-0.468724	0.041	0.036	1	-0.283264	0.036	0.043	1	-0.181122	0.043	0.038	1	0.557439	0.043	0.049	1	0.376316	0.049	0.038	1	0.105179	0.042	0.034	1	0.216974	0.042	0.031	1	0.322153	0.031	0.034	1	-0.750989	0.051	0.071	1	-0.284536	0.051	0.032	1	-1.03553	0.032	0.071	1	-0.341999
Atp6v0a1	-0.00114676	0.435	0.427	1	-0.0584187	0.435	0.462	1	-0.0595655	0.462	0.427	1	0.160195	0.165	0.117	0.370785	0.080938	0.165	0.149	6.61e-06	0.241133	0.149	0.117	1	0.321096	0.158	0.111	0.683717	0.233055	0.158	0.129	2.97e-08	0.554152	0.129	0.111	1	-0.285048	0.202	0.224	1	-0.00980924	0.202	0.172	1	-0.294857	0.172	0.224	1	0.923945
Atp6v0a2	0.113508	0.151	0.128	1	-0.236619	0.151	0.135	0.0577046	-0.12311	0.135	0.128	0.373449	0.326315	0.094	0.057	1	-0.400392	0.094	0.061	8.95e-12	-0.074077	0.061	0.057	1	0.21833	0.074	0.058	1	-0.115742	0.074	0.047	3.25e-11	0.102588	0.047	0.058	7.09e-05	-0.742031	0.062	0.099	1	-0.0639569	0.062	0.047	1	-0.805988	0.047	0.099	1	0.871344
Atp6v0a4													0.702988	0.015	0.007	1	-0.867375	0.015	0.006	0.0416492
Atp6v0b	0.151098	0.337	0.291	1	-0.869906	0.337	0.232	4.16e-92	-0.718808	0.232	0.291	4.29e-88	0.213418	0.26	0.186	0.0141929	-0.879338	0.26	0.13	1.9e-72	-0.66592	0.13	0.186	8.33e-34	0.380854	0.156	0.104	0.597341	-0.579063	0.156	0.077	1.48e-62	-0.198209	0.077	0.104	2.7e-30	0.707526	0.211	0.122	1	-0.892548	0.211	0.099	0.0970796	-0.185022	0.099	0.122	1	0.0307103
Atp6v0c	1.49762	0.013	0.002	2.69e-25	-3.27221	0.013	0.003	1					0.0443673	0.021	0.016	1	0.183794	0.021	0.026	1	0.228161	0.026	0.016	1	0.88008	0.019	0.007	1	0.8366	0.019	0.036	8.63e-07	1.71668	0.036	0.007	3.01e-21	-1.34858	0.012	0.017	1	1.85285	0.012	0.038	1	0.504271	0.038	0.017	1	-0.554028
Atp6v0d1	0.185938	0.213	0.194	1	-0.206497	0.213	0.207	0.0628564	-0.0205584	0.207	0.194	1	-0.0733373	0.145	0.124	1	-0.0410213	0.145	0.123	0.00204047	-0.114359	0.123	0.124	1	-0.152758	0.104	0.099	1	0.0619107	0.104	0.075	1.6e-10	-0.0908472	0.075	0.099	1.02e-10	0.497917	0.143	0.102	1	-0.18932	0.143	0.102	1	0.308597	0.102	0.102	1	0.802824
Atp6v0d2
Atp6v0e	0.136032	0.124	0.112	1	-0.383499	0.124	0.109	1	-0.247467	0.109	0.112	1	-0.296327	0.063	0.064	1	0.473353	0.063	0.07	1	0.177026	0.07	0.064	1	0.1179	0.073	0.056	1	0.0926459	0.073	0.048	9.04e-07	0.210546	0.048	0.056	1	0.298882	0.068	0.068	1	0.285105	0.068	0.066	1	0.583987	0.066	0.068	1	-0.330748
Atp6v0e2
Atp6v1a	0.0149973	0.107	0.1	1	-0.046451	0.107	0.107	1	-0.0314537	0.107	0.1	1	0.0781021	0.107	0.084	1	-0.200912	0.107	0.077	0.000171247	-0.12281	0.077	0.084	1	-0.212354	0.087	0.077	1	0.195836	0.087	0.058	4.11e-08	-0.0165183	0.058	0.077	2.76e-05	-0.514179	0.071	0.085	1	-0.149798	0.071	0.044	1	-0.663977	0.044	0.085	1	0.120709
Atp6v1b1
Atp6v1b2	-0.0814234	0.199	0.205	1	0.100646	0.199	0.234	0.00112073	0.0192221	0.234	0.205	1	-0.0213426	0.089	0.074	1	0.097843	0.089	0.078	1	0.0765004	0.078	0.074	1	0.238882	0.116	0.081	1	-0.136374	0.116	0.072	1.48e-13	0.102508	0.072	0.081	0.475497	0.111337	0.095	0.065	1	0.187297	0.095	0.073	1	0.298634	0.073	0.065	1	-0.309548
Atp6v1c1	-0.191492	0.111	0.122	1	-0.0793302	0.111	0.111	1	-0.270822	0.111	0.122	0.0705004	0.31624	0.077	0.055	1	-0.342089	0.077	0.057	9.38e-06	-0.0258491	0.057	0.055	1	0.201382	0.048	0.04	1	0.00288018	0.048	0.032	4.9e-06	0.204262	0.032	0.04	0.0667024	-0.834353	0.06	0.088	1	0.773461	0.06	0.055	1	-0.0608919	0.055	0.088	1	0.038655
Atp6v1c2
Atp6v1d	0.0527099	0.088	0.086	1	-0.396951	0.088	0.075	1	-0.344241	0.075	0.086	1	0.2716	0.061	0.045	1	-0.66128	0.061	0.031	6.55e-08	-0.389681	0.031	0.045	0.203956	0.2941	0.048	0.038	1	-0.0747353	0.048	0.028	0.000351831	0.219365	0.028	0.038	1	-0.814089	0.042	0.044	1	0.630836	0.042	0.032	1	-0.183254	0.032	0.044	1	0.218226
Atp6v1e1	0.625801	0.119	0.085	0.0328789	-0.812982	0.119	0.08	4.52e-19	-0.18718	0.08	0.085	0.0177176	-0.123768	0.07	0.061	1	-0.367063	0.07	0.044	3.07e-08	-0.49083	0.044	0.061	0.00327198	-0.0996553	0.072	0.068	1	-0.103352	0.072	0.044	4.78e-08	-0.203008	0.044	0.068	1.64e-10	-0.71138	0.068	0.088	1	0.533219	0.068	0.049	1	-0.178161	0.049	0.088	1	-0.558866
Atp6v1e2
Atp6v1f													-0.291001	0.012	0.013	1	-0.305717	0.012	0.008	1	-0.596718	0.008	0.013	1	-0.182617	0.032	0.031	1	0.287692	0.032	0.02	1	0.105075	0.02	0.031	1	-0.615645	0.018	0.041	1	0.0491903	0.018	0.016	1	-0.566454	0.016	0.041	1	-3.50394
Atp6v1fnb
Atp6v1g1	1.13826	0.026	0.013	1	-2.61385	0.026	0.007	1	-1.47559	0.007	0.013	1	0.0026319	0.029	0.023	1	-0.510668	0.029	0.015	1	-0.508036	0.015	0.023	1	0.0389645	0.041	0.04	1	0.245622	0.041	0.028	1	0.284587	0.028	0.04	1	-1.19096	0.024	0.027	1	1.70115	0.024	0.035	1	0.510185	0.035	0.027	1	0.663051
Atp6v1g2	-0.156208	0.039	0.039	1	-0.838851	0.039	0.022	5.78e-15	-0.995059	0.022	0.039	1.6e-16	-0.129964	0.012	0.011	1	-0.712066	0.012	0.007	0.308979	-0.84203	0.007	0.011	1	0.257691	0.015	0.011	1	0.406925	0.015	0.013	1	0.664616	0.013	0.011	1	0.327363	0.036	0.027	1	-0.372095	0.036	0.022	1	-0.0447318	0.022	0.027	1	-0.117135
Atp6v1g3
Atp6v1h	-0.143463	0.221	0.238	1	0.647684	0.221	0.328	3.15e-77	0.504221	0.328	0.238	8.88e-48	0.0519908	0.183	0.147	1	0.415527	0.183	0.191	1	0.467518	0.191	0.147	0.206289	-0.187886	0.153	0.15	1	0.637081	0.153	0.156	1	0.449195	0.156	0.15	1	0.139434	0.22	0.184	1	0.677433	0.22	0.215	1	0.816867	0.215	0.184	1	0.0411281
Atp7a	-0.00823376	0.093	0.096	1	0.117205	0.093	0.111	1	0.108971	0.111	0.096	1	-0.0253056	0.164	0.141	1	0.211155	0.164	0.157	1	0.18585	0.157	0.141	1	-0.136786	0.076	0.08	1	0.364767	0.076	0.067	1	0.227981	0.067	0.08	1	0.198241	0.149	0.15	1	-0.0402006	0.149	0.137	1	0.15804	0.137	0.15	1	0.323353
Atp7b
Atp8a1	0.0020172	0.63	0.622	1	0.135264	0.63	0.7	1.45e-21	0.137281	0.7	0.622	2.75e-18	0.937653	0.013	0.006	1	2.48211	0.013	0.045	1	3.41977	0.045	0.006	1	-0.0347387	0.31	0.272	1	0.560512	0.31	0.323	1	0.525773	0.323	0.272	0.000634821	0.0711711	0.31	0.289	1	0.268947	0.31	0.287	1	0.340118	0.287	0.289	1	0.2567
Atp8a2	0.274143	0.261	0.216	4.08e-09	-0.0120434	0.261	0.268	1	0.262099	0.268	0.216	7.87e-10																									4.15858	0.018	0	1	0.0394308	0.018	0.01	1	4.19801	0.01	0	1
Atp8b1					0.705897	0.002	0.01	1	-0.288741	0.01	0.008	0.0100032	0.211099	0.582	0.458	1.26e-11	0.0305893	0.582	0.519	1	0.241688	0.519	0.458	9.75e-05	-0.132185	0.216	0.193	1	-0.0445064	0.216	0.148	1.92e-19	-0.176692	0.148	0.193	3.01e-08	-0.0847412	0.185	0.187	1	0.247142	0.185	0.178	1	0.162401	0.178	0.187	1	-0.329915
Atp8b2	0.196611	0.035	0.029	1	-1.38726	0.035	0.016	1.75e-31	-1.19065	0.016	0.029	1.85e-27	-0.040972	0.086	0.07	1	-0.596958	0.086	0.046	1.74e-14	-0.63793	0.046	0.07	2.97e-08	0.154231	0.056	0.042	1	-0.575616	0.056	0.024	1.31e-22	-0.421384	0.024	0.042	4.87e-10	1.09115	0.057	0.031	1	-0.999513	0.057	0.028	1	0.0916419	0.028	0.031	1	1.10803
Atp8b3
Atp8b4																																					0.069259	0.006	0.01	1					-2.35508	0.001	0.01	1
Atp8b5																									0.767775	0.103	0.049	4.47e-18	-0.107569	0.103	0.059	6.59e-18	0.660205	0.059	0.049	1	4.66259	0.22	0.017	1.05e-09	-3.865	0.22	0.016	8.6e-23	0.797586	0.016	0.017	1	1.09686
Atp9a	0.304904	0.325	0.264	4.8e-15	-0.808236	0.325	0.214	4.26e-109	-0.503331	0.214	0.264	1.5e-35	-0.0771024	0.179	0.154	1	-0.585385	0.179	0.111	2.17e-24	-0.662488	0.111	0.154	5.22e-11	-0.119032	0.138	0.122	1	-0.074984	0.138	0.093	3.98e-16	-0.194016	0.093	0.122	1.6e-09	-0.125438	0.167	0.173	1	-0.27867	0.167	0.118	1	-0.404108	0.118	0.173	1	-0.649194
Atp9b	-0.11908	0.478	0.486	0.00179333	0.0196014	0.478	0.514	1	-0.0994782	0.514	0.486	1	0.019593	0.432	0.366	1	0.183763	0.432	0.425	1	0.203356	0.425	0.366	1	0.0357257	0.286	0.232	1	0.247137	0.286	0.236	0.00315312	0.282862	0.236	0.232	1	0.051409	0.482	0.401	1	0.0542127	0.482	0.392	1	0.105622	0.392	0.401	1	-0.0424629
Atpaf1	-0.0274304	0.34	0.333	1	0.228788	0.34	0.401	1.45e-14	0.201358	0.401	0.333	1.12e-09	-0.132657	0.044	0.042	1	0.442824	0.044	0.049	1	0.310167	0.049	0.042	1	0.753569	0.034	0.021	1	-0.0627949	0.034	0.022	1.05e-09	0.690774	0.022	0.021	3.24e-05	-0.207639	0.095	0.088	1	-0.0227673	0.095	0.074	1	-0.230406	0.074	0.088	1	1.12331
Atpaf2	-0.0556554	0.078	0.082	0.0386829	-0.320219	0.078	0.072	1	-0.375874	0.072	0.082	2.66e-12	0.448873	0.029	0.018	1	-0.0256619	0.029	0.022	0.696641	0.423212	0.022	0.018	1	0.145593	0.021	0.017	1	0.0522866	0.021	0.017	1	0.197879	0.017	0.017	1	-0.0884443	0.039	0.027	1	0.268966	0.039	0.022	1	0.180522	0.022	0.027	1	-0.00973881
Atpif1	0.339934	0.122	0.097	1	-0.770807	0.122	0.081	1	-0.430873	0.081	0.097	1	-0.383483	0.056	0.056	1	-0.26391	0.056	0.032	6.24e-06	-0.647394	0.032	0.056	9.11e-05	0.277321	0.06	0.048	1	-0.328757	0.06	0.032	0.000434257	-0.0514361	0.032	0.048	0.244094	0.0157528	0.125	0.099	1	-0.783837	0.125	0.048	1	-0.768085	0.048	0.099	1	1.40377
Atpsckmt	-0.0723351	0.077	0.066	1	0.206154	0.077	0.11	4.6e-10	0.133819	0.11	0.066	1.66e-16	0.075276	0.038	0.027	1	-0.154279	0.038	0.032	1	-0.0790027	0.032	0.027	1	0.26077	0.01	0.006	1	-0.014757	0.01	0.01	1	0.246013	0.01	0.006	1	1.46796	0.021	0.01	1	-0.118196	0.021	0.028	1	1.34976	0.028	0.01	1	-0.725652
Atr	0.0155072	0.326	0.31	1	0.037325	0.326	0.345	1	0.0528322	0.345	0.31	1	0.104682	0.164	0.123	1	0.356855	0.164	0.167	1	0.461537	0.167	0.123	1	-0.116401	0.096	0.084	1	0.542837	0.096	0.089	1	0.426436	0.089	0.084	1	-0.222271	0.11	0.105	1	0.607068	0.11	0.122	1	0.384797	0.122	0.105	1	0.602428
Atraid	0.124084	0.107	0.09	1	-0.58082	0.107	0.083	2.21e-09	-0.456737	0.083	0.09	5.48e-08	0.213834	0.052	0.038	1	-0.0411709	0.052	0.043	0.0169303	0.172663	0.043	0.038	1	0.575226	0.054	0.031	1	-0.024011	0.054	0.034	3.52e-09	0.551215	0.034	0.031	1	-0.0352864	0.042	0.034	1	0.0022336	0.042	0.031	1	-0.0330528	0.031	0.034	1	1.47846
Atrip	0.0342004	0.049	0.042	1	-0.933839	0.049	0.027	3.63e-26	-0.899639	0.027	0.042	9.03e-19	0.255858	0.042	0.03	1	-0.582323	0.042	0.022	2.09e-07	-0.326464	0.022	0.03	0.364596	0.183428	0.026	0.021	1	-0.320515	0.026	0.013	2.2e-08	-0.137087	0.013	0.021	0.00151798	-1.14787	0.048	0.071	1	-0.518694	0.048	0.026	1	-1.66656	0.026	0.071	1	0.721164
Atrn	-0.169512	0.398	0.418	0.000173584	0.155882	0.398	0.461	1.73e-09	-0.0136296	0.461	0.418	1	0.0193701	0.224	0.181	1	-0.0226764	0.224	0.186	2.14e-06	-0.00330635	0.186	0.181	1	-0.0389642	0.26	0.237	1	-0.0169284	0.26	0.187	8.4e-16	-0.0558925	0.187	0.237	2.17e-11	0.0577044	0.214	0.184	1	-0.058263	0.214	0.157	1	-0.000558505	0.157	0.184	1	-0.152807
Atrnl1	0.326191	0.585	0.504	1.93e-33	-0.123024	0.585	0.608	1	0.203167	0.608	0.504	1.67e-28	-0.030023	0.82	0.775	1	0.130385	0.82	0.8	1	0.100362	0.8	0.775	1	0.132235	0.378	0.312	2.46e-05	0.122871	0.378	0.319	1.44e-07	0.255106	0.319	0.312	1	-0.0191615	0.554	0.561	1	0.163075	0.554	0.544	1	0.143914	0.544	0.561	1	0.268522
Atrx	-0.132588	0.473	0.482	0.0265129	-0.114014	0.473	0.48	1	-0.246602	0.48	0.482	4.52e-10	0.0342328	0.565	0.479	1	0.055066	0.565	0.521	1	0.0892987	0.521	0.479	1	0.0209659	0.498	0.443	1	0.132226	0.498	0.426	1	0.153192	0.426	0.443	1	0.269	0.565	0.497	1	0.0140353	0.565	0.507	1	0.283035	0.507	0.497	1	-0.172334
Atxn1	0.00643556	0.875	0.886	1	-0.185485	0.875	0.911	5.2e-32	-0.179049	0.911	0.886	2.44e-35	-0.00395754	0.553	0.481	1	0.115905	0.553	0.553	1	0.111947	0.553	0.481	1	0.0267338	0.7	0.643	1	0.243833	0.7	0.679	0.086537	0.270567	0.679	0.643	5.93e-10	-0.0574814	0.485	0.48	1	0.26108	0.485	0.491	1	0.203599	0.491	0.48	1	-0.0453307
Atxn10	0.0159496	0.371	0.358	1	0.0480862	0.371	0.408	1	0.0640358	0.408	0.358	1	-0.358637	0.293	0.293	1	0.0265747	0.293	0.263	0.411664	-0.332062	0.263	0.293	1.37e-05	0.337086	0.091	0.063	1	-0.0884913	0.091	0.058	7.85e-19	0.248594	0.058	0.063	2.22e-05	-0.249155	0.25	0.241	1	-0.429972	0.25	0.14	1	-0.679128	0.14	0.241	1	0.252708
Atxn1l	0.277792	0.044	0.033	1	-0.733375	0.044	0.028	0.0389964	-0.455584	0.028	0.033	1	0.233847	0.033	0.025	1	-0.0457862	0.033	0.028	1	0.18806	0.028	0.025	1	-0.042102	0.037	0.034	1	-0.299764	0.037	0.022	0.0003922	-0.341866	0.022	0.034	0.0226454	3.33623	0.051	0.01	1	-0.642414	0.051	0.028	1	2.69382	0.028	0.01	1	0.563456
Atxn2	-0.146392	0.638	0.663	6.1e-12	0.274207	0.638	0.742	3.25e-68	0.127815	0.742	0.663	8.39e-16	0.219345	0.351	0.263	7.19e-09	-0.0474703	0.351	0.319	9.05e-07	0.171875	0.319	0.263	1	0.490127	0.219	0.143	0.000176103	0.027187	0.219	0.165	2.16e-23	0.517314	0.165	0.143	0.0727605	0.38903	0.324	0.259	1	0.0726472	0.324	0.268	1	0.461677	0.268	0.259	1	0.0960018
Atxn2l	0.503675	0.183	0.135	7.68e-07	-0.826786	0.183	0.143	9.97e-96	-0.323111	0.143	0.135	7.89e-47	0.70268	0.137	0.074	3.78e-09	-0.472243	0.137	0.098	4.97e-39	0.230437	0.098	0.074	0.000266013	0.709504	0.1	0.062	0.133534	-0.171284	0.1	0.069	1.05e-27	0.53822	0.069	0.062	1.01e-05	0.344979	0.146	0.122	1	-0.355041	0.146	0.07	0.000467942	-0.0100616	0.07	0.122	0.497242	0.901923
Atxn3	0.133405	0.146	0.135	1	-0.226684	0.146	0.134	1.43e-05	-0.0932791	0.134	0.135	1	-0.165358	0.115	0.104	1	-0.0723723	0.115	0.09	1.46e-05	-0.23773	0.09	0.104	1	-0.168996	0.12	0.115	1	0.349177	0.12	0.104	0.994758	0.180181	0.104	0.115	1	0.0761175	0.143	0.129	1	0.196473	0.143	0.128	1	0.272591	0.128	0.129	1	0.402963
Atxn7	-0.183524	0.371	0.392	0.00265871	0.155565	0.371	0.426	1.92e-05	-0.0279581	0.426	0.392	1	0.0362025	0.39	0.315	0.13215	0.0560002	0.39	0.354	1	0.0922027	0.354	0.315	1	0.0994599	0.308	0.265	1	0.210779	0.308	0.264	1	0.310239	0.264	0.265	1	0.307696	0.402	0.313	1	0.0152752	0.402	0.336	1	0.322971	0.336	0.313	1	0.165538
Atxn7l1	-0.105015	0.508	0.511	0.0214878	-0.244294	0.508	0.507	3.25e-06	-0.349309	0.507	0.511	7.07e-29	0.0322859	0.319	0.253	1	-0.130663	0.319	0.251	3.56e-11	-0.0983774	0.251	0.253	0.289977	0.4549	0.253	0.165	1.18e-09	-0.302957	0.253	0.154	6.52e-45	0.151944	0.154	0.165	1.77e-05	0.119765	0.408	0.34	1	-0.159081	0.408	0.316	1	-0.0393166	0.316	0.34	1	0.569529
Atxn7l2	0.494485	0.024	0.016	1	-0.990014	0.024	0.012	1.15e-12	-0.495529	0.012	0.016	0.00305858																									4.54592	0.015	0	1	-1.57235	0.015	0.006	1					4.63812
Atxn7l3	0.404367	0.047	0.031	0.0569465	-1.10989	0.047	0.022	1.32e-27	-0.705522	0.022	0.031	2.17e-07	0.550273	0.03	0.015	1	-1.03666	0.03	0.011	2.07e-11	-0.486389	0.011	0.015	1	0.0188449	0.026	0.023	1	-0.806088	0.026	0.01	3.48e-12	-0.787243	0.01	0.023	4.01e-09	-0.198804	0.024	0.02	1	-0.0365183	0.024	0.013	1	-0.235322	0.013	0.02	1	1.13141
Atxn7l3b	-0.219568	0.099	0.1	1	-1.17424	0.099	0.047	6.62e-79	-1.39381	0.047	0.1	1e-95	-0.2499	0.077	0.074	1	-0.593929	0.077	0.044	1.29e-14	-0.843829	0.044	0.074	1.06e-13	-0.170968	0.092	0.088	1	-0.488381	0.092	0.041	5.9e-36	-0.659348	0.041	0.088	1.97e-36	-0.130274	0.077	0.095	1	-0.420957	0.077	0.058	1	-0.551232	0.058	0.095	1	-0.881579
AU015836
AU018091
AU021092																									0.256291	0.061	0.045	1	-0.290013	0.061	0.034	3.11e-09	-0.0337227	0.034	0.045	1	-0.477726	0.06	0.054	1	1.0157	0.06	0.082	1	0.537971	0.082	0.054	1	-0.661168
AU022252	0.195943	0.089	0.075	0.000672963	-0.466035	0.089	0.068	2.85e-15	-0.270092	0.068	0.075	1	-0.307024	0.042	0.042	1	-0.636645	0.042	0.024	1.19e-08	-0.943669	0.024	0.042	0.00113817	0.28898	0.034	0.026	1	-1.03943	0.034	0.013	1.2e-18	-0.750451	0.013	0.026	1.19e-06	1.31857	0.042	0.014	1	-0.171352	0.042	0.022	1	1.14721	0.022	0.014	1	-0.631723
AU022751
AU040320	-0.154246	0.273	0.287	0.0867685	-0.0464546	0.273	0.278	1	-0.200701	0.278	0.287	5.46e-12	0.0277511	0.184	0.142	1	-0.000355441	0.184	0.156	0.000805396	0.0273957	0.156	0.142	1	0.122598	0.146	0.118	1	0.140246	0.146	0.113	4.97e-07	0.262844	0.113	0.118	1	-0.0711538	0.193	0.201	1	0.342297	0.193	0.199	1	0.271143	0.199	0.201	1	0.568207
AU041133	0.161313	0.134	0.116	1	-0.178548	0.134	0.121	1	-0.0172344	0.121	0.116	1	0.859887	0.027	0.011	1	-0.639993	0.027	0.013	0.00849937	0.219894	0.013	0.011	1	0.375521	0.034	0.022	1	-0.199654	0.034	0.018	0.000927955	0.175867	0.018	0.022	1	-0.46813	0.03	0.027	1	-0.435747	0.03	0.016	1	-0.903877	0.016	0.027	1	0.889366
Auh	0.0487256	0.448	0.419	1	-0.63342	0.448	0.35	9.69e-105	-0.584694	0.35	0.419	5.24e-93	0.0109478	0.104	0.08	1	0.0594952	0.104	0.089	3.5e-09	0.070443	0.089	0.08	0.191361	0.380948	0.082	0.056	1	-0.36011	0.082	0.048	1e-36	0.0208383	0.048	0.056	2.54e-23	-0.124565	0.131	0.112	1	-0.336312	0.131	0.079	1	-0.460877	0.079	0.112	1	0.673052
Aunip
Aup1	0.740718	0.026	0.01	1	-0.834405	0.026	0.018	1	-0.0936877	0.018	0.01	1	0.184107	0.038	0.025	1	0.120219	0.038	0.036	1	0.304327	0.036	0.025	1	-0.012846	0.041	0.036	1	0.298607	0.041	0.036	1	0.285761	0.036	0.036	1	0.659765	0.039	0.014	1	0.220131	0.039	0.019	1	0.879895	0.019	0.014	1	-0.170446
Aurka
Aurkaip1													0.71203	0.014	0.009	1	-0.341892	0.014	0.008	1					0.0562122	0.031	0.026	1	-0.271362	0.031	0.015	0.0823447	-0.21515	0.015	0.026	0.177319	-1.10356	0.012	0.024	1	0.0984781	0.012	0.013	1	-1.00509	0.013	0.024	1	-0.488247
Aurkb
Aurkc
Auts2	-0.120685	0.886	0.906	7.38e-12	0.0963652	0.886	0.938	2.64e-11	-0.0243195	0.938	0.906	1	-0.143243	0.779	0.738	1	0.405937	0.779	0.824	1.93e-35	0.262694	0.824	0.738	2.87e-21	0.516243	0.6	0.422	3.05e-48	0.200782	0.6	0.554	1	0.717026	0.554	0.422	2.18e-36	0.546349	0.56	0.449	1	-0.0977948	0.56	0.453	1	0.448555	0.453	0.449	1	0.70327
AV320801
Aven	-0.394581	0.169	0.191	0.00228253	-0.031316	0.169	0.17	1	-0.425897	0.17	0.191	8.9e-09	0.090143	0.171	0.132	1	-0.496379	0.171	0.109	6.61e-18	-0.406236	0.109	0.132	0.00608659	0.144387	0.088	0.066	1	-0.0457715	0.088	0.057	7.92e-11	0.0986152	0.057	0.066	0.565545	0.00250543	0.158	0.129	1	-0.34214	0.158	0.095	1	-0.339635	0.095	0.129	1	-0.170941
Avil	0.168509	0.106	0.093	1	-1.05755	0.106	0.061	1.42e-53	-0.889036	0.061	0.093	8.49e-38	0.502706	0.028	0.015	1	-0.610499	0.028	0.013	5.06e-09	-0.107793	0.013	0.015	1	0.867653	0.011	0.006	1	-0.558603	0.011	0.006	0.043867					1.41747	0.062	0.037	1	-2.96235	0.062	0.01	0.00274305	-1.54489	0.01	0.037	1	2.11604
Avl9	0.207863	0.139	0.121	1	0.0463077	0.139	0.147	1	0.254171	0.147	0.121	0.675029	-0.263882	0.116	0.111	1	0.575773	0.116	0.129	1	0.311891	0.129	0.111	1	-0.0303449	0.12	0.117	1	0.789292	0.12	0.138	1	0.758947	0.138	0.117	1	0.0334016	0.182	0.153	1	0.30383	0.182	0.154	1	0.337232	0.154	0.153	1	-0.281275
Avp
Avpi1																																					2.56494	0.012	0.003	1	-5.48818	0.012	0	1					3.63134
Avpr1a
Avpr1b
Avpr2
AW146154	0.125268	0.07	0.053	6.68e-06	0.545789	0.07	0.125	1.51e-37	0.671057	0.125	0.053	3.59e-85	0.138576	0.036	0.022	1	0.38546	0.036	0.04	1	0.524036	0.04	0.022	0.972521	0.259265	0.011	0.007	1	0.820767	0.011	0.02	1	1.08003	0.02	0.007	7.6e-05	0.316161	0.027	0.02	1	0.926889	0.027	0.06	1	1.24305	0.06	0.02	1	-0.890607
AW209491	0.0639184	0.023	0.017	1	0.315476	0.023	0.034	0.0026468	0.379395	0.034	0.017	3.41e-13
AW549877	0.412117	0.293	0.234	4.07e-10	-0.42426	0.293	0.26	1.27e-17	-0.0121437	0.26	0.234	1	-0.0768584	0.106	0.094	1	0.154631	0.106	0.102	0.278965	0.0777723	0.102	0.094	1	-0.121036	0.061	0.051	1	0.442475	0.061	0.047	2.25e-10	0.321439	0.047	0.051	5.1e-06	-1.23517	0.062	0.102	1	0.986884	0.062	0.084	1	-0.248288	0.084	0.102	1	0.357841
AW551984
AW554918	0.0964535	0.339	0.319	1	0.0683766	0.339	0.378	0.0341798	0.16483	0.378	0.319	4.42e-09	-0.123954	0.368	0.336	1	0.350914	0.368	0.387	1	0.226961	0.387	0.336	0.645437	0.0588723	0.371	0.316	1	0.327564	0.371	0.336	1	0.386436	0.336	0.316	1	-0.114114	0.464	0.449	1	0.423772	0.464	0.482	1	0.309658	0.482	0.449	1	-0.0438089
AW822073
Awat1
Awat2																																					-0.3508	0.003	0.01	1					-1.35198	0.003	0.01	1
Axdnd1																																					-0.716632	0.012	0.014	1	-0.50312	0.012	0.004	1	-1.21975	0.004	0.014	1
Axin1	-0.108424	0.156	0.161	1	-0.00841942	0.156	0.162	1	-0.116843	0.162	0.161	0.910709	-0.0787019	0.181	0.16	1	-0.239976	0.181	0.13	2.03e-12	-0.318678	0.13	0.16	7.02e-07	0.0469083	0.107	0.088	1	-0.159609	0.107	0.069	3.75e-17	-0.1127	0.069	0.088	2.81e-05	-0.69435	0.134	0.173	1	0.173935	0.134	0.119	1	-0.520416	0.119	0.173	1	-0.211155
Axin2	0.386276	0.039	0.029	1	-1.1011	0.039	0.018	1.05e-36	-0.714826	0.018	0.029	4.19e-17	0.219421	0.013	0.008	1	-0.493549	0.013	0.008	0.0397916																	-0.470341	0.021	0.02	1	-1.62238	0.021	0.006	1	-2.09272	0.006	0.02	1
Axl													0.30344	0.547	0.418	2.13e-16	-0.588971	0.547	0.393	4.62e-50	-0.285531	0.393	0.418	0.108877													-0.174369	0.125	0.156	1	-0.53026	0.125	0.071	1	-0.70463	0.071	0.156	1
AY074887
AY358078
AY761184
AY761185
Aym1
Azgp1
Azi2	0.0193282	0.2	0.193	1	-0.345564	0.2	0.179	0.0229912	-0.326236	0.179	0.193	2.74e-10	-0.145479	0.126	0.112	1	0.314656	0.126	0.124	1	0.169177	0.124	0.112	1	0.0760592	0.113	0.095	1	0.397323	0.113	0.095	0.914873	0.473382	0.095	0.095	1	-0.21752	0.113	0.126	1	0.644211	0.113	0.127	1	0.42669	0.127	0.126	1	-0.488337
Azin1	0.430146	0.295	0.225	2.24e-20	0.0144848	0.295	0.306	1	0.444631	0.306	0.225	4.95e-30	0.521601	0.118	0.069	6.04e-06	0.247428	0.118	0.117	1	0.769029	0.117	0.069	0.00975859	0.0606555	0.074	0.065	1	0.94991	0.074	0.086	1	1.01057	0.086	0.065	1	0.718413	0.366	0.269	1	-0.0698074	0.366	0.293	1	0.648606	0.293	0.269	1	-0.211729
Azin2	-0.122936	0.018	0.018	1	-0.227088	0.018	0.015	1	-0.350024	0.015	0.018	0.0230249	-0.33918	0.055	0.05	1	-0.2295	0.055	0.038	1	-0.56868	0.038	0.05	1													-0.240491	0.021	0.017	1	-0.801936	0.021	0.009	1	-1.04243	0.009	0.017	1
B2m													-0.163271	0.124	0.117	1	-0.234829	0.124	0.092	1	-0.3981	0.092	0.117	1	-0.152269	0.454	0.434	1	-0.177406	0.454	0.352	2.56e-11	-0.329675	0.352	0.434	4.09e-16	-0.54471	0.289	0.354	1	0.0629323	0.289	0.25	1	-0.481778	0.25	0.354	1	-0.35103
B3galnt1													-0.0483564	0.01	0.008	1	0.137446	0.01	0.008	1					-0.00857097	0.01	0.008	1	0.1688	0.01	0.006	1					-2.55626	0.006	0.01	1	2.20016	0.006	0.012	1	-0.356104	0.012	0.01	1	-0.514722
B3galnt2	-0.240241	0.309	0.339	9.85e-09	0.207811	0.309	0.362	1.05e-12	-0.0324303	0.362	0.339	1	-0.359026	0.08	0.078	1	0.186806	0.08	0.076	1	-0.17222	0.076	0.078	1	-0.363816	0.073	0.077	1	0.150669	0.073	0.057	0.0010611	-0.213148	0.057	0.077	3.15e-05	-0.147928	0.086	0.078	1	0.543576	0.086	0.087	1	0.395648	0.087	0.078	1	0.402609
B3galt1	-0.035707	0.202	0.186	1	0.0598162	0.202	0.186	8.5e-08	0.0241092	0.186	0.186	1	0.0890539	0.671	0.587	0.0604986	0.338157	0.671	0.667	3.46e-05	0.427211	0.667	0.587	5.42e-23	4.61184	0.015	0.001	0.0727003	-0.993732	0.015	0.004	1.23e-28					0.932218	0.036	0.01	1	-1.95896	0.036	0.007	1	-1.02674	0.007	0.01	1	-1.0228
B3galt2	0.00451134	0.098	0.095	1	0.666466	0.098	0.154	3.4e-40	0.670978	0.154	0.095	1.24e-41	-0.439275	0.016	0.021	1	1.51565	0.016	0.04	0.000318867	1.07638	0.04	0.021	0.192661	0.527909	0.012	0.009	1	1.44889	0.012	0.024	0.367524	1.9768	0.024	0.009	0.130992	-2.67	0.006	0.017	1	3.53233	0.006	0.045	1	0.862327	0.045	0.017	1	0.0103636
B3galt4
B3galt5
B3galt6
B3gat1
B3gat2	-0.299715	0.029	0.032	1	1.04322	0.029	0.059	9.69e-27	0.743507	0.059	0.032	5.47e-17	0.138708	0.017	0.011	1	0.343309	0.017	0.018	1	0.482017	0.018	0.011	1	0.345063	0.011	0.006	1	0.852962	0.011	0.014	1	1.19802	0.014	0.006	1	-1.26594	0.015	0.027	1	0.621831	0.015	0.022	1	-0.644104	0.022	0.027	1	-0.115572
B3gat3	0.116127	0.06	0.061	1	-0.221184	0.06	0.067	1	-0.105057	0.067	0.061	1	-0.378176	0.073	0.065	1	0.064363	0.073	0.064	1	-0.313813	0.064	0.065	1	0.22065	0.065	0.051	1	-0.179733	0.065	0.042	1.21e-06	0.0409165	0.042	0.051	0.00484113	0.183045	0.077	0.065	1	0.0519042	0.077	0.064	1	0.234949	0.064	0.065	1	-0.975274
B3glct	0.142715	0.089	0.08	1	0.154673	0.089	0.103	1	0.297388	0.103	0.08	1	-0.135101	0.103	0.083	1	0.353101	0.103	0.098	1	0.218	0.098	0.083	1	0.206253	0.038	0.024	1	0.109702	0.038	0.026	0.146476	0.315955	0.026	0.024	1	0.35019	0.119	0.082	1	-0.33585	0.119	0.07	1	0.0143407	0.07	0.082	1	0.26236
B3gnt2	0.284248	0.032	0.025	0.0643292	0.73118	0.032	0.058	9.75e-15	1.01543	0.058	0.025	1.26e-39	0.0370749	0.058	0.044	1	1.57458	0.058	0.13	9.8e-24	1.61165	0.13	0.044	6.18e-35	-0.0319228	0.07	0.053	1	0.472327	0.07	0.08	1	0.440404	0.08	0.053	0.000442631	-0.941711	0.051	0.054	1	1.326	0.051	0.082	1	0.384284	0.082	0.054	1	0.554272
B3gnt3																									-0.272002	0.048	0.049	1	0.377009	0.048	0.037	1	0.105007	0.037	0.049	1	1.05073	0.03	0.017	1	-0.0615214	0.03	0.017	1	0.98921	0.017	0.017	1	0.218799
B3gnt4
B3gnt5
B3gnt6
B3gnt7
B3gnt8													0.0358201	0.021	0.016	1	-0.576342	0.021	0.011	0.497534	-0.540522	0.011	0.016	1													2.03583	0.012	0.003	1	0.602416	0.012	0.007	1
B3gnt9													-0.173968	0.032	0.03	1	0.457786	0.032	0.034	1	0.283818	0.034	0.03	1
B3gntl1	-0.0232357	0.208	0.203	1	-0.263452	0.208	0.189	5.11e-07	-0.286688	0.189	0.203	2.74e-15	0.00980284	0.136	0.105	1	-0.0693027	0.136	0.099	1.58e-07	-0.0594999	0.099	0.105	1	0.161638	0.083	0.063	1	-0.119539	0.083	0.051	2.28e-13	0.0420992	0.051	0.063	1.09e-05	0.183425	0.107	0.085	1	-0.105734	0.107	0.071	1	0.0776907	0.071	0.085	1	0.363375
B4galnt1
B4galnt2																																					-4.37059	0	0.014	1					-1.03022	0.006	0.014	1
B4galnt3
B4galnt4
B4galt1	-0.336965	0.519	0.585	3.94e-54	-0.379311	0.519	0.478	4.82e-32	-0.716276	0.478	0.585	4.08e-197	-0.208946	0.468	0.451	1	-0.126411	0.468	0.401	1.05e-08	-0.335357	0.401	0.451	1.13e-15	0.126444	0.162	0.125	1	0.0282573	0.162	0.125	1.29e-20	0.154701	0.125	0.125	3.66e-13	-0.148342	0.387	0.374	1	0.00424356	0.387	0.306	1	-0.144099	0.306	0.374	1	0.371863
B4galt2	-0.0465589	0.009	0.011	1					-1.69814	0.005	0.011	0.206976	-0.0878414	0.037	0.031	1	-0.438845	0.037	0.022	0.00098714	-0.526686	0.022	0.031	1													-2.1475	0.003	0.01	1					0.782138	0.009	0.01	1
B4galt3	1.23009	0.025	0.012	1	-0.318451	0.025	0.023	1	0.911639	0.023	0.012	1	0.11854	0.022	0.014	1	0.493141	0.022	0.023	1	0.611681	0.023	0.014	1	0.308412	0.036	0.022	1	0.52187	0.036	0.033	1	0.830282	0.033	0.022	1	1.49125	0.045	0.014	1	0.0112304	0.045	0.042	1	1.50248	0.042	0.014	1	-0.905896
B4galt4													-0.169755	0.02	0.02	1	-0.511564	0.02	0.013	1	-0.681319	0.013	0.02	1	0.121214	0.155	0.125	1	0.154004	0.155	0.116	0.000165791	0.275218	0.116	0.125	1	-0.707649	0.039	0.044	1	0.0427355	0.039	0.033	1	-0.664914	0.033	0.044	1	0.0774328
B4galt5	0.0684447	0.049	0.052	0.0112552	-0.342478	0.049	0.045	1.69e-07	-0.274033	0.045	0.052	1.87e-31	-0.520404	0.153	0.161	1	-0.424043	0.153	0.11	6.89e-11	-0.944447	0.11	0.161	2.04e-19	0.316661	0.068	0.05	1	-0.150053	0.068	0.044	3.03e-12	0.166608	0.044	0.05	0.000278082	0.209876	0.292	0.269	1	-0.424609	0.292	0.202	1	-0.214733	0.202	0.269	1	0.321988
B4galt6	-0.214162	0.137	0.156	6.78e-07	-0.0322605	0.137	0.136	1	-0.246422	0.136	0.156	8.94e-14	-0.643103	0.013	0.011	1	1.54818	0.013	0.021	1	0.90508	0.021	0.011	1													0.287654	0.211	0.187	1	0.11497	0.211	0.162	1	0.402624	0.162	0.187	1	-5.0786
B4galt7	-0.162955	0.05	0.053	1	-0.0870498	0.05	0.05	1	-0.250005	0.05	0.053	0.0008987	0.0261703	0.025	0.019	1	0.0432977	0.025	0.02	1	0.069468	0.02	0.019	1	0.469119	0.017	0.01	1	-0.0267481	0.017	0.011	0.00580237	0.442371	0.011	0.01	1	1.58643	0.036	0.014	1	-1.45761	0.036	0.013	1	0.128823	0.013	0.014	1	-1.11494
B4gat1	0.126774	0.01	0.008	1	-2.09849	0.01	0.002	1																	-0.503613	0.014	0.013	1	-0.766832	0.014	0.004	1	-1.27045	0.004	0.013	1	0.713474	0.015	0.007	1	-0.0854124	0.015	0.016	1	0.628061	0.016	0.007	1	-0.684547
B9d1													-0.316074	0.013	0.012	1	0.272477	0.013	0.011	1	-0.0435971	0.011	0.012	1													0.521132	0.012	0.01	1	0.172823	0.012	0.009	1	0.693955	0.009	0.01	1
B9d2	0.582773	0.024	0.016	1	-1.12721	0.024	0.014	0.00274827	-0.544438	0.014	0.016	6.71e-06																									-2.7641	0.006	0.014	1					-0.796285	0.007	0.014	1	1.05444
Baalc
Baat
Babam1	0.186769	0.067	0.059	1	-0.76359	0.067	0.051	8.67e-09	-0.576822	0.051	0.059	5.79e-13	0.0041018	0.06	0.046	1	-0.681254	0.06	0.034	1.15e-08	-0.677152	0.034	0.046	0.00401889	0.0432723	0.064	0.051	1	-0.36943	0.064	0.036	4.87e-16	-0.326157	0.036	0.051	1.04e-07	-0.678866	0.051	0.061	1	0.249338	0.051	0.044	1	-0.429528	0.044	0.061	1	0.466544
Babam2	-0.261765	0.585	0.619	4.6e-23	0.303772	0.585	0.684	1.83e-56	0.0420064	0.684	0.619	0.174198	-0.148225	0.388	0.342	1	0.380488	0.388	0.409	1	0.232263	0.409	0.342	1	-0.0696469	0.343	0.311	1	0.476896	0.343	0.345	1	0.407249	0.345	0.311	1	-0.0614509	0.408	0.364	1	0.2784	0.408	0.365	1	0.216949	0.365	0.364	1	0.251614
Bace1	-0.0842952	0.156	0.154	1	-0.231429	0.156	0.147	0.000615781	-0.315724	0.147	0.154	6.96e-07	-0.0846834	0.072	0.056	1	-0.0188733	0.072	0.06	0.0215213	-0.103557	0.06	0.056	1	0.647697	0.032	0.018	1	0.118121	0.032	0.025	0.000713216	0.765819	0.025	0.018	1	-0.984396	0.062	0.085	1	0.210084	0.062	0.058	1	-0.774312	0.058	0.085	1	0.449095
Bace2													0.243498	0.064	0.043	1	0.0619022	0.064	0.059	1	0.3054	0.059	0.043	1	-0.119341	0.05	0.047	1	0.501472	0.05	0.046	1	0.382131	0.046	0.047	1	-0.550587	0.568	0.639	1	0.347206	0.568	0.549	1	-0.203381	0.549	0.639	1	-0.850662
Bach1	0.212848	0.389	0.337	2.28e-06	-0.432674	0.389	0.331	2.92e-42	-0.219826	0.331	0.337	1.1e-09	0.361002	0.066	0.041	1	-0.533677	0.066	0.04	7.84e-22	-0.172674	0.04	0.041	1.77e-05	0.157311	0.098	0.078	1	-0.353876	0.098	0.052	1.36e-39	-0.196564	0.052	0.078	5.72e-22	0.310406	0.128	0.078	1	-0.280182	0.128	0.071	1	0.030224	0.071	0.078	1	-0.0248641
Bach2	0.0429665	0.513	0.478	1	0.169937	0.513	0.579	7.11e-11	0.212904	0.579	0.478	2.53e-26	0.311113	0.306	0.225	5.67e-09	-0.00426699	0.306	0.265	9.72e-05	0.306846	0.265	0.225	1	-0.0722012	0.354	0.323	1	0.209972	0.354	0.318	1	0.137771	0.318	0.323	1	-0.153472	0.164	0.143	1	0.545057	0.164	0.207	1	0.391585	0.207	0.143	1	-0.476594
Bad	0.476979	0.057	0.045	1	-0.941747	0.057	0.036	8.77e-06	-0.464768	0.036	0.045	1	0.380055	0.027	0.017	1	-0.51138	0.027	0.014	0.0361021	-0.131325	0.014	0.017	1	0.454936	0.035	0.023	1	-0.862811	0.035	0.012	6.74e-18	-0.407875	0.012	0.023	5.23e-05	1.56931	0.036	0.01	1	-0.766149	0.036	0.022	1	0.803164	0.022	0.01	1	-0.807548
Bag1	0.688315	0.032	0.019	1	-3.1846	0.032	0.004	1	-2.49629	0.004	0.019	1	-0.119949	0.041	0.033	1	-0.999365	0.041	0.012	1	-1.11931	0.012	0.033	1	-0.271542	0.041	0.054	1	-0.388121	0.041	0.021	1	-0.659663	0.021	0.054	1.03e-09	-0.0566483	0.062	0.054	1	-1.21611	0.062	0.019	1	-1.27276	0.019	0.054	1	-1.28666
Bag2	0.0450789	0.145	0.131	1	0.391138	0.145	0.191	6.43e-09	0.436217	0.191	0.131	7.78e-16																									1.58889	0.012	0.003	1	-3.01615	0.012	0.001	1
Bag3	0.267458	0.657	0.596	4.91e-20	-0.187063	0.657	0.657	9.89e-07	0.0803959	0.657	0.596	1	0.241534	0.062	0.039	1	0.337077	0.062	0.065	6.29e-18	0.578611	0.065	0.039	0.00110577	1.19501	0.093	0.032	0.00421196	0.115372	0.093	0.069	5.56e-30	1.31038	0.069	0.032	5.9e-06	-0.796595	0.092	0.109	1	-0.157341	0.092	0.054	0.153329	-0.953936	0.054	0.109	0.00730976	-0.0515979
Bag4	-0.0862462	0.057	0.054	1	-0.212955	0.057	0.051	1	-0.299202	0.051	0.054	1	-0.360621	0.03	0.03	1	-0.450013	0.03	0.019	1	-0.810634	0.019	0.03	0.0137121	-0.34734	0.023	0.024	1	0.174701	0.023	0.017	1	-0.17264	0.017	0.024	1	-0.478697	0.027	0.041	1	-0.0204939	0.027	0.025	1	-0.499191	0.025	0.041	1	-0.867261
Bag5													-0.254883	0.019	0.018	1	0.0579549	0.019	0.014	1	-0.196928	0.014	0.018	1	0.123656	0.055	0.043	1	-0.370948	0.055	0.027	2.19e-13	-0.247292	0.027	0.043	0.0148321	-1.73019	0.006	0.02	1					-0.0468794	0.009	0.02	1	-1.33465
Bag6	0.545212	0.062	0.042	5.6e-06	-1.97461	0.062	0.019	3.45e-48	-1.4294	0.019	0.042	1.53e-13	0.117594	0.039	0.031	1	-0.189211	0.039	0.029	0.000331294	-0.0716162	0.029	0.031	1	0.0130006	0.054	0.048	1	0.110545	0.054	0.037	3.34e-06	0.123546	0.037	0.048	1	0.052082	0.08	0.065	1	-0.705169	0.08	0.025	1	-0.653087	0.025	0.065	1	0.351153
Bahcc1	-0.25923	0.142	0.157	0.000130744	-0.879043	0.142	0.082	1.71e-64	-1.13827	0.082	0.157	3.84e-123	-0.0500583	0.078	0.062	1	-0.741357	0.078	0.04	3.97e-20	-0.791415	0.04	0.062	1.4e-09	0.0663936	0.075	0.064	1	-0.653883	0.075	0.033	7.47e-35	-0.58749	0.033	0.064	1.16e-30	-0.0405272	0.086	0.068	1	-0.765058	0.086	0.039	1	-0.805585	0.039	0.068	1	-0.507803
Bahd1	0.272673	0.045	0.037	1	-1.10105	0.045	0.021	2.65e-25	-0.828377	0.021	0.037	1.5e-13	0.322843	0.026	0.016	1	-0.742335	0.026	0.013	0.00147556	-0.419492	0.013	0.016	1	-0.270584	0.027	0.026	1	-0.00176803	0.027	0.016	0.005227	-0.272352	0.016	0.026	0.00781409	-0.608431	0.033	0.044	1	-0.597691	0.033	0.013	1	-1.20612	0.013	0.044	1	-2.90735
Baiap2	0.68907	0.014	0.013	1	-1.20742	0.014	0.01	5.34e-08	-0.518352	0.01	0.013	4.44e-10	-0.4086	0.071	0.073	1	0.125275	0.071	0.062	1	-0.283325	0.062	0.073	1	0.204291	0.071	0.046	0.227772	-0.677682	0.071	0.033	1.89e-24	-0.473391	0.033	0.046	0.00334298	0.334681	0.244	0.163	1	-0.308792	0.244	0.162	1	0.0258886	0.162	0.163	1	-1.50587
Baiap2l1	-0.0305997	0.415	0.405	1	-0.0061012	0.415	0.431	1	-0.0367009	0.431	0.405	1					2.66082	0.005	0.022	1	3.58186	0.022	0.001	1													-0.422608	0.027	0.014	1	0.503849	0.027	0.019	1	0.0812414	0.019	0.014	1
Baiap2l2
Baiap3
Bak1	0.0751175	0.032	0.029	1	0.0440236	0.032	0.037	1	0.119141	0.037	0.029	1	1.0738	0.018	0.005	1	-0.611114	0.018	0.009	1					0.0803579	0.026	0.024	1	-0.0394465	0.026	0.016	0.0508184	0.0409114	0.016	0.024	0.0405586	1.96097	0.027	0.01	1	-0.339048	0.027	0.02	1	1.62192	0.02	0.01	1	1.22504
Bambi	-0.00615621	0.022	0.023	1	-1.94189	0.022	0.006	0.000282913	-1.94805	0.006	0.023	0.0196542																									-1.08134	0.006	0.02	1					-1.38539	0.009	0.02	1
Banf1													-0.43276	0.009	0.01	1					-0.445701	0.007	0.01	1	0.570834	0.026	0.017	1	0.181013	0.026	0.016	1	0.751847	0.016	0.017	1	-0.897174	0.015	0.017	1	1.46221	0.015	0.016	1	0.565036	0.016	0.017	1	1.05055
Banf2
Bank1
Banp	0.308174	0.178	0.123	2.46e-23	-0.0322631	0.178	0.231	0.000135383	0.275911	0.231	0.123	1.36e-64	0.215429	0.186	0.121	6.54e-07	-0.205208	0.186	0.16	0.108514	0.010221	0.16	0.121	1	0.296502	0.097	0.061	0.000463871	0.0892091	0.097	0.113	1	0.385711	0.113	0.061	1.3e-13	0.113433	0.095	0.088	1	0.343864	0.095	0.162	1	0.457297	0.162	0.088	1	0.672221
Bap1	0.829756	0.019	0.009	1	-0.0686849	0.019	0.017	0.00919233	0.761071	0.017	0.009	1	0.158146	0.022	0.015	1	0.193521	0.022	0.019	1	0.351667	0.019	0.015	1	-0.232099	0.019	0.02	1	0.55177	0.019	0.017	1	0.319672	0.017	0.02	1	-0.708658	0.03	0.034	1	0.626723	0.03	0.025	1	-0.0819354	0.025	0.034	1	0.164614
Bard1					1.29285	0.003	0.01	1	0.157582	0.01	0.009	1	-0.716032	0.013	0.013	1	1.34215	0.013	0.021	1	0.62612	0.021	0.013	1													-0.788972	0.012	0.017	1	0.238336	0.012	0.007	1	-0.550636	0.007	0.017	1	-1.36636
Barhl1
Barhl2
Barx1
Barx2
Basp1													0.339183	0.061	0.047	1	-1.35973	0.061	0.025	2.39e-15	-1.02055	0.025	0.047	4.77e-06
Batf																																					0.144929	0.036	0.027	1	-1.2683	0.036	0.013	1	-1.12337	0.013	0.027	1
Batf2																									-0.455311	0.011	0.013	1	-0.464482	0.011	0.005	1	-0.919793	0.005	0.013	0.0170936	0.296689	0.024	0.017	1	-1.12287	0.024	0.009	1	-0.826182	0.009	0.017	1	-0.125265
Batf3
Bax	0.392482	0.01	0.007	1	-2.11476	0.01	0.003	1					0.0849001	0.034	0.024	1	0.0316586	0.034	0.027	1	0.116559	0.027	0.024	1	0.0789358	0.04	0.032	1	0.28645	0.04	0.031	1	0.365386	0.031	0.032	1	0.969344	0.036	0.017	1	0.633216	0.036	0.02	1	1.60256	0.02	0.017	1	0.437
Baz1a	-0.205598	0.082	0.091	1	0.206962	0.082	0.095	1	0.00136392	0.095	0.091	1	0.218683	0.09	0.064	1	-0.573547	0.09	0.052	5.41e-10	-0.354864	0.052	0.064	1	-0.0231896	0.131	0.126	1	0.417714	0.131	0.124	1	0.394525	0.124	0.126	1	0.69602	0.101	0.082	1	-1.06365	0.101	0.049	1	-0.367634	0.049	0.082	1	0.0878895
Baz1b	-0.0517094	0.516	0.504	1	-0.202127	0.516	0.502	2.17e-11	-0.253836	0.502	0.504	5.53e-15	0.185557	0.268	0.199	3.59e-05	-0.00217808	0.268	0.23	4.47e-07	0.183379	0.23	0.199	1	0.251755	0.223	0.164	0.00994927	-0.0788892	0.223	0.152	7.63e-29	0.172866	0.152	0.164	1.39e-05	-0.191907	0.295	0.316	1	0.119598	0.295	0.259	1	-0.0723092	0.259	0.316	1	-0.135717
Baz2a	0.0410503	0.35	0.335	1	-0.17958	0.35	0.342	4.17e-06	-0.13853	0.342	0.335	1	0.0075199	0.206	0.165	0.0388431	-0.221332	0.206	0.152	3.06e-17	-0.213812	0.152	0.165	1	0.111485	0.139	0.108	1	-0.190236	0.139	0.084	4.47e-34	-0.0787511	0.084	0.108	8.56e-14	-0.0612293	0.202	0.194	1	0.0256178	0.202	0.146	1	-0.0356115	0.146	0.194	1	0.766207
Baz2b	-0.213838	0.671	0.7	1.78e-25	0.162919	0.671	0.749	5.86e-27	-0.0509193	0.749	0.7	1	-0.0496779	0.643	0.584	1	0.104027	0.643	0.62	1	0.0543492	0.62	0.584	1	0.0407157	0.649	0.581	1	0.239855	0.649	0.615	1	0.280571	0.615	0.581	7.69e-07	-0.182276	0.75	0.735	1	0.278246	0.75	0.719	1	0.0959699	0.719	0.735	1	0.0653685
BB014433
BB287469
Bbc3													0.58727	0.013	0.009	1	0.369155	0.013	0.012	1	0.956425	0.012	0.009	1	-0.254382	0.017	0.014	1	0.499787	0.017	0.013	1	0.245405	0.013	0.014	1	0.631138	0.018	0.014	1	-0.369177	0.018	0.009	1	0.261961	0.009	0.014	1	-0.169255
Bbip1	0.0644943	0.134	0.125	1	0.179686	0.134	0.163	0.0353637	0.24418	0.163	0.125	0.19018	-0.243187	0.096	0.086	1	0.15328	0.096	0.09	1	-0.089907	0.09	0.086	1	0.0306894	0.07	0.064	1	0.122307	0.07	0.056	0.632874	0.152996	0.056	0.064	0.655233	-0.0311482	0.107	0.126	1	0.0501085	0.107	0.105	1	0.0189603	0.105	0.126	1	-0.197925
Bbof1	-0.149156	0.151	0.162	0.253737	0.210008	0.151	0.178	0.00138383	0.0608522	0.178	0.162	1																									-1.02123	0.009	0.01	1					-1.08797	0.006	0.01	1
Bbox1													1.25557	0.019	0.008	0.825597	0.0692696	0.019	0.015	1	1.32484	0.015	0.008	1
Bbs1	0.512444	0.033	0.022	1	-0.972301	0.033	0.018	1.26e-07	-0.459857	0.018	0.022	0.0318865	0.319927	0.019	0.01	1	-0.444135	0.019	0.011	1	-0.124208	0.011	0.01	1	1.32533	0.011	0.004	1	-0.712458	0.011	0.004	0.061551					0.110646	0.015	0.01	1	-0.597007	0.015	0.009	1	-0.486361	0.009	0.01	1	-0.49336
Bbs10	-0.374881	0.018	0.019	1	-1.3693	0.018	0.006	5.96e-11	-1.74418	0.006	0.019	1.93e-16	-0.789109	0.007	0.01	1					-1.59995	0.003	0.01	0.760666
Bbs12	-0.158737	0.023	0.026	1	0.271712	0.023	0.028	1	0.112974	0.028	0.026	1	0.30162	0.026	0.016	1	0.464894	0.026	0.025	1	0.766515	0.025	0.016	1	-0.44523	0.011	0.011	1	0.812015	0.011	0.009	1	0.366785	0.009	0.011	1	-0.550572	0.018	0.02	1	1.97355	0.018	0.031	1	1.42298	0.031	0.02	1
Bbs2	0.320794	0.082	0.064	5.84e-05	-0.447381	0.082	0.062	2.68e-14	-0.126586	0.062	0.064	1	-0.0345595	0.042	0.039	1	0.0863617	0.042	0.042	1	0.0518022	0.042	0.039	1	0.111362	0.018	0.014	1	0.104451	0.018	0.013	0.00326357	0.215812	0.013	0.014	1	-1.32453	0.03	0.051	1	0.576414	0.03	0.029	1	-0.748119	0.029	0.051	1	1.40284
Bbs4	0.18336	0.043	0.039	1	0.328771	0.043	0.059	0.151869	0.512131	0.059	0.039	1	-0.0244003	0.03	0.024	1	0.183086	0.03	0.03	1	0.158685	0.03	0.024	1	0.449905	0.018	0.011	1	0.338781	0.018	0.016	1	0.788686	0.016	0.011	1	0.599786	0.027	0.02	1	0.138155	0.027	0.029	1	0.737941	0.029	0.02	1	4.8836
Bbs5	-0.217461	0.053	0.058	1	-0.115688	0.053	0.054	1	-0.333149	0.054	0.058	0.0836726	-0.173396	0.038	0.034	1	-0.117921	0.038	0.028	1	-0.291317	0.028	0.034	1	0.980522	0.014	0.005	1	-0.48768	0.014	0.007	0.00130762					-0.96391	0.015	0.024	1	0.196555	0.015	0.017	1	-0.767355	0.017	0.024	1
Bbs7	-0.00919217	0.042	0.043	1	0.0754877	0.042	0.047	1	0.0662956	0.047	0.043	1	-0.178112	0.054	0.047	1	-0.070147	0.054	0.042	1	-0.248259	0.042	0.047	1	0.0893491	0.028	0.02	1	0.179237	0.028	0.017	0.0954372	0.268586	0.017	0.02	1	0.119986	0.054	0.061	1	-0.133448	0.054	0.039	1	-0.0134626	0.039	0.061	1	0.044441
Bbs9	0.491807	0.252	0.184	6.45e-25	-0.288666	0.252	0.227	1.02e-07	0.203141	0.227	0.184	0.0278518	0.130693	0.326	0.251	1.37e-05	0.107513	0.326	0.284	1	0.238206	0.284	0.251	1	-0.120924	0.315	0.29	1	0.12814	0.315	0.253	0.000169467	0.00721577	0.253	0.29	0.508424	-0.0458381	0.274	0.286	1	-0.123229	0.274	0.236	1	-0.169068	0.236	0.286	1	-0.215852
Bbx	-0.390868	0.369	0.424	4.01e-38	0.465239	0.369	0.466	4.4e-59	0.0743705	0.466	0.424	1	-0.189981	0.248	0.227	1	0.643012	0.248	0.3	0.00118445	0.453031	0.3	0.227	4.7e-05	0.0730073	0.226	0.188	1	0.403755	0.226	0.199	1	0.476762	0.199	0.188	1	0.0999326	0.36	0.323	1	0.289777	0.36	0.323	1	0.389709	0.323	0.323	1	-0.232234
BC003965	0.40764	0.067	0.036	1	-0.473412	0.067	0.05	1.96e-10	-0.0657719	0.05	0.036	2.25e-11	0.148088	0.04	0.026	1	0.0384322	0.04	0.036	1	0.18652	0.036	0.026	1	0.134045	0.031	0.022	1	0.60106	0.031	0.03	1	0.735105	0.03	0.022	1	0.0763581	0.045	0.041	1	0.270635	0.045	0.038	1	0.346993	0.038	0.041	1	1.60726
BC004004	-0.234835	0.218	0.236	2.86e-06	-0.30661	0.218	0.187	1	-0.541445	0.187	0.236	7.32e-24	-0.242053	0.06	0.05	1	0.141132	0.06	0.052	1	-0.10092	0.052	0.05	1	0.0814317	0.057	0.049	1	-0.0724325	0.057	0.037	1.84e-05	0.00899918	0.037	0.049	0.000229206	0.398172	0.077	0.051	1	0.015116	0.077	0.052	1	0.413288	0.052	0.051	1	-0.933922
BC005537	0.493086	0.49	0.376	1.45e-56	-0.234154	0.49	0.474	0.00935648	0.258932	0.474	0.376	8.25e-34	-0.0982481	0.135	0.125	1	0.638379	0.135	0.179	1	0.540131	0.179	0.125	1	0.303979	0.149	0.119	1	0.422739	0.149	0.128	0.25748	0.726718	0.128	0.119	1	-0.00928366	0.143	0.119	1	0.481741	0.143	0.144	1	0.472458	0.144	0.119	1	-0.290139
BC005561	-0.131789	0.418	0.434	0.126657	-0.500169	0.418	0.351	1.14e-47	-0.631958	0.351	0.434	3.35e-87	0.0920204	0.135	0.099	1	-0.403215	0.135	0.087	1.67e-15	-0.311195	0.087	0.099	0.0312173	0.406618	0.114	0.081	0.13085	-0.389194	0.114	0.065	7.74e-30	0.0174246	0.065	0.081	3.14e-06	-0.38086	0.202	0.204	1	-0.246297	0.202	0.118	1	-0.627157	0.118	0.204	0.91839	0.269053
BC005624	0.235416	0.062	0.049	0.266978	-1.37261	0.062	0.027	6.83e-35	-1.1372	0.027	0.049	7.8e-13	0.120577	0.063	0.052	1	-0.69497	0.063	0.035	7.85e-10	-0.574393	0.035	0.052	0.00491422	0.155597	0.047	0.041	1	-0.687388	0.047	0.021	4.44e-15	-0.531791	0.021	0.041	5.34e-07	-0.409904	0.083	0.071	1	-0.0195597	0.083	0.045	1	-0.429463	0.045	0.071	1	-0.0603865
BC016579
BC017158	-0.210348	0.014	0.023	1	-0.0384763	0.014	0.02	1	-0.248824	0.02	0.023	1	-0.304064	0.043	0.043	1	0.285773	0.043	0.042	1	-0.018291	0.042	0.043	1	0.492765	0.02	0.016	1	0.295701	0.02	0.017	1	0.788466	0.017	0.016	1	0.265917	0.048	0.054	1	-0.0716117	0.048	0.045	1	0.194305	0.045	0.054	1	-0.00648981
BC024063	-0.358593	0.033	0.039	1	0.23276	0.033	0.038	1	-0.125833	0.038	0.039	1	-0.168319	0.03	0.026	1	0.0772163	0.03	0.022	1	-0.0911028	0.022	0.026	1	-0.232963	0.018	0.019	1	-0.1867	0.018	0.01	0.0168495	-0.419663	0.01	0.019	0.00461777	0.0267444	0.027	0.02	1	-5.91195	0.027	0	1	-5.88521	0	0.02	1	-1.13873
BC024139
BC024978	-0.00164745	0.036	0.035	1	0.252652	0.036	0.044	1	0.251004	0.044	0.035	1	0.258656	0.02	0.012	1	0.0399976	0.02	0.018	1	0.298653	0.018	0.012	1																									1.23267
BC025920	-0.430425	0.027	0.034	1	0.122407	0.027	0.032	1	-0.308018	0.032	0.034	1
BC028528					0.121801	0.002	0.014	4.97e-07	1.44048	0.014	0.004	0.000174359	0.209663	0.017	0.013	1	-0.769693	0.017	0.009	0.346421	-0.56003	0.009	0.013	1	0.110846	0.123	0.104	1	-0.630555	0.123	0.059	6.44e-37	-0.519709	0.059	0.104	1.24e-17	-0.337179	0.036	0.031	1	-0.386877	0.036	0.025	1	-0.724056	0.025	0.031	1	-0.42675
BC029722													0.179969	0.022	0.016	1	-0.525061	0.022	0.011	1	-0.345093	0.011	0.016	1	-0.211542	0.016	0.017	1	-0.170954	0.016	0.008	1	-0.382496	0.008	0.017	1	0.244232	0.03	0.027	1	-0.949694	0.03	0.013	1	-0.705462	0.013	0.027	1	0.96952
BC030500
BC030867
BC031181	0.196169	0.066	0.058	1	-0.250603	0.066	0.065	1	-0.0544339	0.065	0.058	1	-0.136051	0.037	0.036	1	0.515263	0.037	0.048	1	0.379212	0.048	0.036	1	-0.20185	0.04	0.043	1	-0.0841929	0.04	0.026	0.0064148	-0.286043	0.026	0.043	1.65e-05	-1.17618	0.027	0.065	1	-0.0706687	0.027	0.028	1	-1.24685	0.028	0.065	1	0.633789
BC034090	-0.100058	0.327	0.333	0.142541	-0.620778	0.327	0.252	1.24e-80	-0.720836	0.252	0.333	9.3e-131	-0.22872	0.03	0.032	1	0.63143	0.03	0.038	0.000458692	0.402711	0.038	0.032	4.98e-10													3.9497	0.018	0	1	-2.93703	0.018	0.001	1
BC035044
BC035947
BC048403	0.932423	0.014	0.007	1	-0.716194	0.014	0.008	0.414188																													-0.737245	0.006	0.014	1	0.304242	0.006	0.01	1	-0.433003	0.01	0.014	1
BC048507
BC048562
BC048671
BC048679
BC049352
BC049715	-0.171355	0.013	0.013	1	0.378032	0.013	0.018	1	0.206677	0.018	0.013	1
BC049762	0.139543	0.014	0.012	1	0.327361	0.014	0.017	1	0.466904	0.017	0.012	1
BC051019
BC051142																																					1.87486	0.015	0.007	1	-0.480446	0.015	0.01	1	1.39442	0.01	0.007	1	2.53586
BC051665
BC052040	-0.0399174	0.217	0.215	1	0.525643	0.217	0.296	5.51e-38	0.485725	0.296	0.215	1.58e-28	0.0244945	0.111	0.081	1	0.425825	0.111	0.11	1	0.45032	0.11	0.081	1	0.216269	0.073	0.054	1	0.138767	0.073	0.052	0.00232586	0.355036	0.052	0.054	1	-0.00828383	0.08	0.085	1	0.285587	0.08	0.082	1	0.277303	0.082	0.085	1	-0.039441
BC053393
BC055324													-0.229336	0.01	0.009	1	0.19127	0.01	0.009	1					0.457636	0.012	0.007	1	-0.074529	0.012	0.007	1					2.17158	0.015	0.003	1	0.282815	0.015	0.019	1	2.45439	0.019	0.003	1	-0.152317
BC061212
BC061237
BC067074	-0.544241	0.036	0.048	0.249977	1.05852	0.036	0.068	3.26e-24	0.514283	0.068	0.048	5.14e-07	-0.240319	0.026	0.023	1	1.23335	0.026	0.043	1	0.993032	0.043	0.023	0.149533
BC080695
BC107364
BC147527
Bcam	0.286647	0.224	0.192	0.00156539	-0.0866038	0.224	0.238	0.695136	0.200043	0.238	0.192	6.57e-20													-0.0100944	0.174	0.14	1	0.0170983	0.174	0.123	6.97e-07	0.00700393	0.123	0.14	1	-0.81232	0.137	0.146	1	0.91746	0.137	0.151	1	0.10514	0.151	0.146	1	0.0551815
Bcan
Bcap29	-0.137196	0.254	0.262	0.257895	0.192343	0.254	0.284	0.011806	0.0551472	0.284	0.262	1	-0.164768	0.07	0.062	1	0.621686	0.07	0.08	1	0.456919	0.08	0.062	1	0.205934	0.039	0.031	1	0.480015	0.039	0.036	1	0.685949	0.036	0.031	1	-0.944746	0.039	0.071	1	1.01339	0.039	0.057	1	0.0686441	0.057	0.071	1	-2.05318
Bcap31	0.2951	0.08	0.067	1	-0.117255	0.08	0.082	1	0.177845	0.082	0.067	1	0.0491256	0.099	0.073	1	0.0889973	0.099	0.083	1	0.138123	0.083	0.073	1	0.362825	0.068	0.052	1	0.176646	0.068	0.051	0.921189	0.539471	0.051	0.052	1	-0.131643	0.089	0.092	1	0.594239	0.089	0.093	1	0.462596	0.093	0.092	1	-0.176245
Bcar1	-0.318521	0.096	0.124	2.97e-14	0.0133791	0.096	0.112	1	-0.305142	0.112	0.124	1.17e-08	0.365797	0.058	0.037	1	-0.70239	0.058	0.031	1.65e-10	-0.336593	0.031	0.037	0.0811778	-0.0033061	0.112	0.114	1	0.270391	0.112	0.1	1	0.267085	0.1	0.114	1	-0.061955	0.152	0.177	1	-0.686471	0.152	0.08	1	-0.748426	0.08	0.177	0.205769	0.466123
Bcar3	0.408663	0.083	0.067	1	0.0728151	0.083	0.093	1	0.481478	0.093	0.067	1	-0.634214	0.011	0.012	1	0.968263	0.011	0.015	1	0.334048	0.015	0.012	1	0.339755	0.118	0.089	0.437226	-0.338725	0.118	0.072	1.39e-18	0.00102989	0.072	0.089	0.282212	1.26333	0.152	0.061	1	-0.306934	0.152	0.093	1	0.956401	0.093	0.061	1	0.187809
Bcas1
Bcas2	0.131908	0.047	0.049	1	-0.51226	0.047	0.04	1	-0.380352	0.04	0.049	1	0.226927	0.042	0.031	1	0.194483	0.042	0.039	1	0.421409	0.039	0.031	1	-0.0473886	0.033	0.029	1	0.438228	0.033	0.027	1	0.39084	0.027	0.029	1	0.629991	0.071	0.054	1	0.286901	0.071	0.054	1	0.916891	0.054	0.054	1	0.451772
Bcas3	0.38028	0.738	0.651	6.91e-72	-0.00453807	0.738	0.79	1	0.375742	0.79	0.651	1.96e-116	0.107411	0.577	0.473	1.54e-06	0.00586552	0.577	0.52	0.0115945	0.113277	0.52	0.473	1	0.0684733	0.416	0.351	0.0488347	0.211098	0.416	0.367	0.0102738	0.279571	0.367	0.351	1	-0.216034	0.491	0.483	1	0.239771	0.491	0.432	1	0.0237365	0.432	0.483	1	-0.163915
Bcat1													0.258136	0.092	0.063	0.828889	-0.643122	0.092	0.05	5.66e-12	-0.384986	0.05	0.063	1
Bcat2	0.0991529	0.218	0.196	1	-0.201862	0.218	0.197	1	-0.102709	0.197	0.196	1	0.245894	0.03	0.022	1	0.0147632	0.03	0.024	1	0.260657	0.024	0.022	1	0.319303	0.017	0.012	1	-0.257172	0.017	0.01	0.063348	0.062131	0.01	0.012	0.155244	0.414223	0.03	0.017	1	-0.936492	0.03	0.012	1	-0.522269	0.012	0.017	1	1.02275
Bccip	0.0295295	0.057	0.055	1	-0.600508	0.057	0.041	4.09e-06	-0.570978	0.041	0.055	0.004691	0.390051	0.036	0.022	1	-0.364473	0.036	0.024	0.000961558	0.0255781	0.024	0.022	1	-0.0810283	0.022	0.023	1	0.191985	0.022	0.017	1	0.110956	0.017	0.023	1	0.888277	0.03	0.024	1	-0.893713	0.03	0.012	1	-0.00543601	0.012	0.024	1	0.50771
Bcdin3d	0.326927	0.042	0.032	1	-0.562514	0.042	0.029	0.0061502	-0.235587	0.029	0.032	0.00634894	-0.493636	0.031	0.032	1	0.366815	0.031	0.029	1	-0.126822	0.029	0.032	1	1.27787	0.014	0.005	1	-0.26111	0.014	0.006	0.122506					4.15807	0.012	0	1	0.611732	0.012	0.016	1	4.7698	0.016	0	1
Bche	-0.386917	0.164	0.195	1.17e-10	0.127815	0.164	0.171	1	-0.259102	0.171	0.195	2.28e-07																									-0.609905	0.012	0.003	1	-1.81178	0.012	0.001	1
Bckdha	0.351135	0.365	0.288	3.67e-17	-0.718495	0.365	0.263	2.14e-51	-0.36736	0.263	0.288	0.000554422	-0.77373	0.036	0.046	1	-0.801026	0.036	0.016	7.44e-07	-1.57476	0.016	0.046	4.24e-14	-0.193766	0.048	0.042	1	0.0521704	0.048	0.03	0.00523811	-0.141595	0.03	0.042	8.01e-11	-2.17044	0.042	0.102	1	0.934007	0.042	0.039	1	-1.23643	0.039	0.102	1	0.246919
Bckdhb	-0.188147	0.421	0.436	0.00136269	0.319687	0.421	0.499	6.89e-30	0.131541	0.499	0.436	8.76e-06	-0.182428	0.204	0.181	1	0.53321	0.204	0.23	1	0.350782	0.23	0.181	1	1.05433	0.065	0.027	1	0.329086	0.065	0.058	0.433647	1.38341	0.058	0.027	1	-0.162971	0.19	0.173	1	0.248729	0.19	0.172	1	0.0857579	0.172	0.173	1	1.02779
Bckdk	0.588155	0.027	0.021	1	-2.29592	0.027	0.005	2.32e-15	-1.70776	0.005	0.021	8.47e-21	0.313978	0.043	0.029	1	-0.980017	0.043	0.016	7.83e-12	-0.666039	0.016	0.029	0.000137674	0.128017	0.032	0.024	1	-0.492837	0.032	0.014	1.37e-05	-0.36482	0.014	0.024	0.00144268	0.408102	0.018	0.024	1	-0.113883	0.018	0.019	1	0.294219	0.019	0.024	1	0.407983
Bcl10	0.400118	0.034	0.026	1	-2.08841	0.034	0.01	9.29e-23	-1.68829	0.01	0.026	5.04e-14	0.0485875	0.036	0.029	1	0.110838	0.036	0.03	1	0.159425	0.03	0.029	1	-0.256368	0.056	0.058	1	0.804769	0.056	0.059	1	0.5484	0.059	0.058	1	-2.16839	0.024	0.065	1	-0.0853122	0.024	0.009	1	-2.25371	0.009	0.065	0.0149598	1.24675
Bcl11a	-0.301065	0.212	0.236	0.00134023	0.139496	0.212	0.218	1	-0.161569	0.218	0.236	7.66e-07
Bcl11b	-0.585519	0.025	0.035	0.0237892	-0.944935	0.025	0.014	9.62e-07	-1.53045	0.014	0.035	7.55e-29
Bcl2	0.206803	0.066	0.058	1	0.779094	0.066	0.117	6.19e-14	0.985896	0.117	0.058	1.1e-23	-0.0308936	0.416	0.354	1	0.277024	0.416	0.404	1	0.24613	0.404	0.354	0.0515216	-0.547157	0.265	0.314	1.52e-05	0.502396	0.265	0.283	0.83038	-0.0447608	0.283	0.314	1	-0.600688	0.14	0.173	1	0.373969	0.14	0.137	1	-0.226719	0.137	0.173	1	-0.757998
Bcl2a1a
Bcl2a1b
Bcl2a1c
Bcl2a1d
Bcl2l1	0.144481	0.145	0.135	1	-0.262633	0.145	0.14	0.0125091	-0.118153	0.14	0.135	1	0.99887	0.314	0.154	6.77e-55	0.293293	0.314	0.332	1	1.29216	0.332	0.154	2.51e-73	0.519932	0.382	0.244	1.25e-35	0.040378	0.382	0.309	2.76e-05	0.56031	0.309	0.244	1.48e-12	0.0313684	0.333	0.279	1	1.13482	0.333	0.464	0.000857836	1.16619	0.464	0.279	1.39e-05	0.199912
Bcl2l10
Bcl2l11	0.185567	0.191	0.176	1	-0.409892	0.191	0.155	1.31e-21	-0.224325	0.155	0.176	4.57e-11					2.65531	0.005	0.018	1	1.2668	0.018	0.006	1	-0.516021	0.056	0.058	1	0.0607986	0.056	0.034	2.29e-14	-0.455222	0.034	0.058	5.45e-20	-1.269	0.045	0.078	1	0.905828	0.045	0.047	1	-0.363174	0.047	0.078	1	-1.0142
Bcl2l12	0.230285	0.041	0.031	1	-0.303781	0.041	0.032	1	-0.073496	0.032	0.031	1	0.807688	0.034	0.014	1	-0.0509366	0.034	0.023	1	0.756751	0.023	0.014	1	-0.372903	0.021	0.023	1	0.716093	0.021	0.021	1	0.34319	0.021	0.023	1	0.597239	0.057	0.027	1	-0.678651	0.057	0.022	1	-0.0814122	0.022	0.027	1	-0.831418
Bcl2l13	-0.166061	0.278	0.291	0.0475721	0.434003	0.278	0.363	1e-40	0.267943	0.363	0.291	2.36e-15	-0.278483	0.059	0.053	1	0.0768754	0.059	0.053	0.0195836	-0.201608	0.053	0.053	1	0.228923	0.059	0.04	1	-0.0198932	0.059	0.041	1.19e-05	0.209029	0.041	0.04	1	1.02764	0.077	0.048	1	-0.486948	0.077	0.048	1	0.540691	0.048	0.048	1	0.71838
Bcl2l14
Bcl2l15	-0.880419	0.006	0.01	1					-0.465569	0.008	0.01	1
Bcl2l2	1.26391	0.019	0.006	1	-0.122606	0.019	0.028	1	1.1413	0.028	0.006	1.1e-11	0.128381	0.048	0.033	1	-0.122634	0.048	0.04	1	0.00574697	0.04	0.033	1	1.96826	0.011	0.002	1	0.00942803	0.011	0.011	1	1.97768	0.011	0.002	1	0.957653	0.039	0.014	1	-0.330279	0.039	0.039	1	0.627373	0.039	0.014	1
Bcl3					-0.180141	0.008	0.011	1	0.297172	0.011	0.007	1	-1.32817	0.026	0.052	0.000223102	0.128922	0.026	0.026	1	-1.19924	0.026	0.052	3.41e-09	-1.02596	0.03	0.046	1	0.0220138	0.03	0.019	0.0826931	-1.00395	0.019	0.046	1.41e-17	-0.683783	0.036	0.044	1	0.134332	0.036	0.029	1	-0.549451	0.029	0.044	1	-2.6123
Bcl6	0.172339	0.161	0.149	1	-0.584247	0.161	0.118	9.35e-36	-0.411908	0.118	0.149	1.86e-36	0.122674	0.15	0.13	1	0.0163028	0.15	0.141	1	0.138977	0.141	0.13	1													-0.399335	0.065	0.099	1	-0.00247	0.065	0.055	1	-0.401805	0.055	0.099	1	0.422092
Bcl6b																									-0.0925741	0.258	0.24	1	0.887341	0.258	0.315	1.43e-24	0.794767	0.315	0.24	1.76e-28	0.170913	0.065	0.058	1	0.319163	0.065	0.044	1	0.490076	0.044	0.058	1	1.10128
Bcl7a	-0.173633	0.163	0.176	1	-0.550582	0.163	0.121	4.18e-38	-0.724214	0.121	0.176	7.62e-62	0.278531	0.107	0.071	0.182268	-0.523852	0.107	0.064	1.45e-15	-0.245321	0.064	0.071	1	-0.382171	0.044	0.043	1	0.370608	0.044	0.034	6.27e-07	-0.0115636	0.034	0.043	1.77e-06	0.220541	0.03	0.034	1	-0.0112176	0.03	0.022	1	0.209324	0.022	0.034	1	0.536216
Bcl7b	0.107235	0.074	0.061	1	-0.482008	0.074	0.054	1.87e-06	-0.374773	0.054	0.061	1	0.54093	0.052	0.03	0.0228769	-0.277004	0.052	0.036	0.1212	0.263925	0.036	0.03	1	0.152189	0.041	0.035	1	0.177051	0.041	0.031	0.655878	0.32924	0.031	0.035	1	-0.912829	0.054	0.075	1	-0.316906	0.054	0.025	1	-1.22973	0.025	0.075	1	0.053044
Bcl7c	0.047965	0.017	0.02	1	-0.970711	0.017	0.012	1	-0.922746	0.012	0.02	0.000280297	0.090084	0.111	0.089	1	-0.353808	0.111	0.077	1.42e-05	-0.263724	0.077	0.089	1	-0.0761332	0.05	0.045	1	-0.145133	0.05	0.034	0.0189942	-0.221266	0.034	0.045	0.668123	-1.1935	0.06	0.105	1	0.537493	0.06	0.051	1	-0.656006	0.051	0.105	1	0.0918655
Bcl9	0.211457	0.641	0.593	3.05e-14	-0.270932	0.641	0.627	3.03e-22	-0.0594749	0.627	0.593	1	-0.976905	0.032	0.034	1	1.97209	0.032	0.074	0.226906	0.995186	0.074	0.034	1	1.24418	0.044	0.012	0.00821085	-0.17946	0.044	0.021	1.01e-52	1.06472	0.021	0.012	6.21e-17	-0.486006	0.128	0.119	1	0.35995	0.128	0.112	1	-0.126056	0.112	0.119	1	0.99625
Bcl9l	0.1697	0.216	0.194	0.291578	-0.682106	0.216	0.153	1.38e-59	-0.512406	0.153	0.194	8.53e-31	0.115997	0.109	0.081	0.106244	-0.592933	0.109	0.065	5.64e-20	-0.476936	0.065	0.081	0.0604091	0.101027	0.054	0.046	1	-0.666022	0.054	0.024	3.1e-32	-0.564995	0.024	0.046	8.17e-23	0.385388	0.128	0.116	1	-0.320453	0.128	0.079	1	0.0649345	0.079	0.116	1	0.24741
Bclaf1	0.36536	0.599	0.51	1.52e-44	0.116054	0.599	0.663	2.51e-13	0.481414	0.663	0.51	9.59e-129	-0.157303	0.329	0.296	1	0.449682	0.329	0.362	1	0.292379	0.362	0.296	0.155366	-0.144277	0.286	0.256	1	0.454815	0.286	0.265	1	0.310538	0.265	0.256	1	-0.161173	0.44	0.469	1	0.361276	0.44	0.44	1	0.200103	0.44	0.469	1	-0.062869
Bclaf3	0.22102	0.08	0.062	1	-0.159266	0.08	0.077	1	0.0617545	0.077	0.062	1	0.00278911	0.146	0.119	1	-0.144147	0.146	0.11	0.000463012	-0.141358	0.11	0.119	1	0.020174	0.081	0.07	1	0.346259	0.081	0.073	1	0.366433	0.073	0.07	1	0.00266101	0.113	0.075	1	-0.177358	0.113	0.071	1	-0.174697	0.071	0.075	1	0.473545
Bco1
Bco2
Bcor	-0.0516415	0.227	0.234	1	-0.563279	0.227	0.176	1.84e-37	-0.61492	0.176	0.234	6.15e-69	0.101783	0.234	0.182	0.401351	-0.264823	0.234	0.173	4.53e-13	-0.16304	0.173	0.182	1	-0.029543	0.143	0.122	1	0.044705	0.143	0.104	2.5e-11	0.015162	0.104	0.122	2.54e-06	0.710834	0.223	0.194	1	-0.20485	0.223	0.201	1	0.505984	0.201	0.194	1	0.304586
Bcorl1	0.0624423	0.059	0.061	1	-0.49866	0.059	0.046	2.89e-05	-0.436218	0.046	0.061	6.16e-06	0.221356	0.109	0.074	0.0730818	-0.269335	0.109	0.074	4.29e-07	-0.0479784	0.074	0.074	1	0.137878	0.055	0.05	1	-0.026104	0.055	0.04	0.0309307	0.111774	0.04	0.05	0.858522	-0.733251	0.119	0.153	1	0.00464322	0.119	0.082	1	-0.728608	0.082	0.153	1	0.3682
Bcr	0.462886	0.063	0.052	0.462062	-0.602163	0.063	0.048	2.07e-11	-0.139278	0.048	0.052	1	-0.27845	0.225	0.219	1	-0.165706	0.225	0.168	7.32e-08	-0.444156	0.168	0.219	1.7e-07	-0.0564088	0.147	0.135	1	-0.199742	0.147	0.095	8.92e-17	-0.25615	0.095	0.135	2.01e-09	0.394053	0.387	0.35	1	-0.273177	0.387	0.304	1	0.120876	0.304	0.35	1	-0.673128
Bcs1l	-0.155188	0.104	0.11	1	-0.946848	0.104	0.06	5.18e-48	-1.10204	0.06	0.11	9.44e-70	-0.0941652	0.035	0.032	1	-1.71881	0.035	0.01	2.41e-19	-1.81298	0.01	0.032	3.01e-21	-0.566138	0.018	0.019	1	-1.09035	0.018	0.006	6.41e-14	-1.65648	0.006	0.019	6.03e-17	-1.75469	0.021	0.024	1	-1.51698	0.021	0.004	1	-3.27167	0.004	0.024	1	-0.964864
Bdh1	-0.303329	0.136	0.165	7.27e-11	0.0656504	0.136	0.161	2.39e-07	-0.237679	0.161	0.165	1
Bdh2													-0.0413428	0.021	0.016	1	-0.277233	0.021	0.013	1	-0.318575	0.013	0.016	1
Bdkrb1
Bdkrb2																																																	1.74286
Bdnf	-0.266524	0.172	0.192	0.00250677	0.610858	0.172	0.232	9.39e-24	0.344334	0.232	0.192	0.00113548
Bdp1	-0.0267704	0.377	0.371	1	-0.074327	0.377	0.387	1	-0.101097	0.387	0.371	1	-0.141054	0.195	0.175	1	0.25093	0.195	0.195	1	0.109876	0.195	0.175	1	-0.0625791	0.164	0.144	1	0.353779	0.164	0.138	0.00511041	0.2912	0.138	0.144	1	-0.355985	0.247	0.259	1	0.27476	0.247	0.179	1	-0.0812252	0.179	0.259	1	-0.116632
Bean1													-0.0292504	0.07	0.062	1	-0.197009	0.07	0.054	1	-0.226259	0.054	0.062	1													0.775172	0.012	0.003	1	-1.00143	0.012	0.001	1					1.016
Becn1	0.511702	0.109	0.08	1	-1.14258	0.109	0.061	2.21e-34	-0.630876	0.061	0.08	3.06e-15	0.0596134	0.098	0.082	1	-0.531804	0.098	0.055	1.16e-13	-0.47219	0.055	0.082	2.66e-07	0.142802	0.104	0.086	1	-0.590301	0.104	0.05	3e-33	-0.447499	0.05	0.086	4.56e-15	0.0994352	0.098	0.088	1	-0.209935	0.098	0.063	1	-0.1105	0.063	0.088	1	-0.218584
Begain													-0.392891	0.016	0.013	1	-0.327561	0.016	0.008	1	-0.720452	0.008	0.013	1
Bend3	-0.295666	0.123	0.137	0.0266446	-0.265911	0.123	0.102	5.26e-05	-0.561577	0.102	0.137	7.49e-26																									-1.84221	0.015	0.02	1	-1.77587	0.015	0.001	1	-3.61809	0.001	0.02	1	0.589195
Bend4	-0.4765	0.022	0.031	0.000324775	0.273087	0.022	0.026	1	-0.203413	0.026	0.031	0.0307292																									0.167482	0.021	0.02	1	-0.902784	0.021	0.009	1	-0.735302	0.009	0.02	1
Bend5
Bend6													-0.229412	0.054	0.051	1	-0.00695906	0.054	0.041	1	-0.236371	0.041	0.051	1													-3.55684	0	0.01	1					-4.58869	0	0.01	1
Bend7	-0.41314	0.146	0.178	6.77e-13	-0.00408426	0.146	0.151	1	-0.417225	0.151	0.178	6.37e-17													-0.0762878	0.154	0.139	1	-0.10115	0.154	0.101	1.07e-14	-0.177438	0.101	0.139	1.31e-08	-0.518354	0.08	0.133	1	-0.255031	0.08	0.055	1	-0.773386	0.055	0.133	0.247551	0.317584
Best1
Best2
Best3	-0.678826	0.132	0.185	5.43e-40	0.823662	0.132	0.229	1.87e-82	0.144837	0.229	0.185	0.00342545
Bet1	-0.208205	0.058	0.067	1	0.343673	0.058	0.077	0.104773	0.135468	0.077	0.067	1	-0.553724	0.044	0.053	1	0.537813	0.044	0.053	1	-0.0159112	0.053	0.053	1	-0.211825	0.048	0.049	1	0.41806	0.048	0.041	1	0.206236	0.041	0.049	1	0.225185	0.062	0.051	1	0.625689	0.062	0.066	1	0.850874	0.066	0.051	1	0.250191
Bet1l	0.75654	0.017	0.01	1	-0.623321	0.017	0.017	1	0.133219	0.017	0.01	1	-0.107737	0.047	0.039	1	-0.0227878	0.047	0.046	1	-0.130524	0.046	0.039	1	1.00588	0.012	0.005	1	0.227557	0.012	0.016	1	1.23344	0.016	0.005	1	0.72766	0.033	0.014	1	-1.20059	0.033	0.015	1	-0.472932	0.015	0.014	1	-0.591398
Bex1
Bex2
Bex3																	0.777568	0.006	0.01	1	0.412629	0.01	0.007	1													0.531808	0.012	0.014	1	-0.234266	0.012	0.01	1	0.297542	0.01	0.014	1
Bex4																																					-1.88116	0.006	0.024	1	1.85063	0.006	0.01	1	-0.030532	0.01	0.024	1
Bex6
Bfar	0.402273	0.249	0.191	4.23e-16	-0.0557753	0.249	0.262	1	0.346497	0.262	0.191	5.14e-19	-0.0879461	0.117	0.099	1	0.295501	0.117	0.117	1	0.207555	0.117	0.099	1	-0.0213654	0.091	0.078	1	0.198031	0.091	0.077	0.223314	0.176666	0.077	0.078	1	0.0889137	0.134	0.133	1	-0.214437	0.134	0.096	1	-0.125523	0.096	0.133	1	0.394617
Bfsp1																																					-1.13212	0.015	0.024	1	-1.15767	0.015	0.003	1	-2.28979	0.003	0.024	1
Bfsp2	-0.604894	0.006	0.01	0.000196368	0.854993	0.006	0.014	9.29e-09	0.250098	0.014	0.01	1
Bglap
Bglap2
Bglap3
Bgn													0.187982	0.401	0.304	4.12e-07	0.343188	0.401	0.402	1	0.531171	0.402	0.304	1.27e-20	0.538186	0.015	0.013	1	-0.146163	0.015	0.011	1	0.392023	0.011	0.013	1	-0.862975	0.205	0.316	1	1.25057	0.205	0.304	0.256559	0.387596	0.304	0.316	1	0.594256
Bhlha15
Bhlha9
Bhlhb9	-0.507972	0.01	0.014	1	0.610669	0.01	0.013	1	0.102697	0.013	0.014	1	-0.877866	0.015	0.021	1	0.703428	0.015	0.019	1	-0.174438	0.019	0.021	1													-0.979161	0.018	0.054	1	0.93406	0.018	0.031	1	-0.0451012	0.031	0.054	1
Bhlhe22
Bhlhe23
Bhlhe40	0.463297	0.134	0.095	2.49e-19	-0.62124	0.134	0.094	3.86e-17	-0.157943	0.094	0.095	1	0.576841	0.118	0.059	5.87e-12	0.318403	0.118	0.104	1	0.895244	0.104	0.059	0.000181285	-0.0643601	0.052	0.042	1	0.710609	0.052	0.056	1	0.646249	0.056	0.042	1	0.0128216	0.065	0.044	1	0.240837	0.065	0.048	1	0.253659	0.048	0.044	1	0.43695
Bhlhe41	0.295371	0.123	0.101	1.52e-07	-0.0426946	0.123	0.124	1	0.252676	0.124	0.101	0.216537	1.4415	0.089	0.024	5.25e-26	-1.58934	0.089	0.021	5.96e-50	-0.147841	0.021	0.024	1													-0.124126	0.015	0.007	1	1.10022	0.015	0.012	1	0.976092	0.012	0.007	1	6.16008
Bhmt
Bhmt2
Bicc1	0.549429	0.019	0.027	1	-1.82749	0.019	0.016	6.78e-24	-1.27806	0.016	0.027	3.47e-50	-0.199805	0.942	0.927	1.33e-05	-0.0248263	0.942	0.931	1	-0.224631	0.931	0.927	2.4e-18	9.33053	0.026	0	6.49e-07	0.0335012	0.026	0.016	1.3e-45	9.36403	0.016	0	6.23e-06	-0.285449	0.482	0.517	1	-0.0669589	0.482	0.444	1	-0.352408	0.444	0.517	1	0.646127
Bicd1	-0.258521	0.281	0.312	4.08e-15	0.411715	0.281	0.347	6.59e-28	0.153193	0.347	0.312	1	0.00993663	0.108	0.091	1	0.443448	0.108	0.11	1	0.453384	0.11	0.091	1	3.09079	0.02	0.004	1	-0.489004	0.02	0.009	3.55e-12					-0.45207	0.205	0.221	1	0.637906	0.205	0.22	1	0.185837	0.22	0.221	1	1.14233
Bicd2	0.088403	0.223	0.202	1	-1.01123	0.223	0.127	5.16e-112	-0.922826	0.127	0.202	1.43e-103	0.0931554	0.094	0.076	1	-0.864783	0.094	0.049	5.49e-30	-0.771628	0.049	0.076	7.41e-17	-0.365911	0.154	0.163	1	-0.525671	0.154	0.074	5.39e-55	-0.891582	0.074	0.163	1.92e-72	-1.28529	0.054	0.078	1	-0.255629	0.054	0.022	1	-1.54091	0.022	0.078	0.18887	-0.329424
Bicdl1	0.454233	0.011	0.009	1	-0.839037	0.011	0.006	0.0217971																																									4.94196
Bicdl2
Bicra	-0.177107	0.404	0.414	0.161575	0.010539	0.404	0.433	1	-0.166568	0.433	0.414	0.0150912	0.146212	0.274	0.21	0.0711452	-0.409418	0.274	0.198	2.86e-26	-0.263206	0.198	0.21	6.71e-06	0.0301468	0.273	0.235	1	-0.379016	0.273	0.17	5.72e-50	-0.34887	0.17	0.235	5.49e-31	0.363932	0.342	0.296	1	-0.268687	0.342	0.237	1	0.0952459	0.237	0.296	1	-0.291262
Bicral	0.203169	0.278	0.237	8.12e-10	-0.117183	0.278	0.322	1	0.0859865	0.322	0.237	2.82e-14	0.0469432	0.249	0.2	0.363514	0.173527	0.249	0.269	1	0.22047	0.269	0.2	1	0.175349	0.125	0.098	1	0.402043	0.125	0.142	1	0.577392	0.142	0.098	1	-0.0873201	0.193	0.187	1	0.461525	0.193	0.242	1	0.374205	0.242	0.187	1	-0.697848
Bid																									-0.60045	0.012	0.017	1	-0.336189	0.012	0.006	1	-0.936639	0.006	0.017	1.12e-05	2.06131	0.033	0.007	1	-1.49916	0.033	0.016	1	0.562145	0.016	0.007	1	0.843322
Bik	-0.302194	0.188	0.215	1.63e-07	-0.0214766	0.188	0.195	1	-0.32367	0.195	0.215	2.26e-16													-0.14802	0.022	0.023	1	0.902886	0.022	0.028	1	0.754866	0.028	0.023	1	0.0264238	0.19	0.136	1	-0.218495	0.19	0.111	1	-0.192071	0.111	0.136	1
Bin1													-0.0397904	0.127	0.104	1	-0.433318	0.127	0.08	1.66e-13	-0.473108	0.08	0.104	0.000263968	-0.159944	0.069	0.061	1	-0.248909	0.069	0.04	1.32e-13	-0.408854	0.04	0.061	1.5e-05	-0.0817878	0.045	0.054	1	-0.472163	0.045	0.031	1	-0.553951	0.031	0.054	1	0.118367
Bin2
Bin3	-0.0374739	0.03	0.029	0.0111789	-0.327694	0.03	0.024	4.52e-15	-0.365167	0.024	0.029	1	-0.120973	0.098	0.085	1	-0.403916	0.098	0.063	2.3e-11	-0.524889	0.063	0.085	0.102642	-0.139155	0.069	0.062	1	0.127494	0.069	0.049	4.59e-05	-0.0116613	0.049	0.062	0.568745	-0.648715	0.051	0.065	1	-0.261989	0.051	0.035	1	-0.910704	0.035	0.065	1	-0.019514
Birc2	-0.00996625	0.194	0.184	1	-0.183334	0.194	0.188	0.69174	-0.1933	0.188	0.184	0.0883307	-0.22543	0.134	0.128	1	0.825056	0.134	0.186	0.00464663	0.599627	0.186	0.128	0.000262457	-0.00616338	0.107	0.091	1	0.313681	0.107	0.085	0.000347252	0.307518	0.085	0.091	0.675405	0.0998498	0.14	0.116	1	0.617105	0.14	0.15	1	0.716955	0.15	0.116	1	0.117402
Birc3	1.74802	0.033	0.014	1	-1.12283	0.033	0.02	0.00343332	0.625187	0.02	0.014	1	-0.120961	0.17	0.145	1	0.445389	0.17	0.17	1	0.324428	0.17	0.145	1	-0.230727	0.132	0.131	1	0.357773	0.132	0.113	1	0.127046	0.113	0.131	0.069009	0.219936	0.11	0.109	1	0.222194	0.11	0.092	1	0.44213	0.092	0.109	1	0.468844
Birc5
Birc6	-0.0345431	0.618	0.623	1	-0.0801051	0.618	0.651	1	-0.114648	0.651	0.623	1	-0.191881	0.493	0.478	1	0.238751	0.493	0.514	1	0.0468692	0.514	0.478	1	-0.00912965	0.455	0.408	1	0.229183	0.455	0.404	1	0.220053	0.404	0.408	1	0.0681527	0.539	0.48	1	0.0512098	0.539	0.476	1	0.119363	0.476	0.48	1	0.410084
Birc7
Bivm	-0.23836	0.042	0.049	1	-0.242677	0.042	0.038	0.53121	-0.481037	0.038	0.049	7.22e-07	0.0483142	0.038	0.028	1	-0.289822	0.038	0.026	0.418776	-0.241508	0.026	0.028	1	0.519647	0.025	0.015	1	-0.273975	0.025	0.012	3.98e-08	0.245672	0.012	0.015	1	-0.546812	0.045	0.051	1	-0.384536	0.045	0.022	1	-0.931348	0.022	0.051	1	0.553754
Blcap	0.0117482	0.239	0.232	1	-0.19937	0.239	0.229	9.33e-05	-0.187622	0.229	0.232	1.28e-05	-0.140231	0.023	0.017	1	0.453529	0.023	0.023	8.84e-08	0.313298	0.023	0.017	0.0118035	0.53055	0.031	0.016	1	-0.289548	0.031	0.017	1.13e-17	0.241002	0.017	0.016	2.7e-10	-0.879027	0.054	0.051	1	0.860084	0.054	0.039	1	-0.0189431	0.039	0.051	1	0.0351836
Blk	0.381341	0.031	0.025	1	1.68077	0.031	0.098	9.35e-72	2.06211	0.098	0.025	6.7e-102
Blm	-0.158562	0.042	0.047	1	0.0229076	0.042	0.045	1	-0.135655	0.045	0.047	1	-0.323822	0.033	0.03	1	0.161787	0.033	0.03	1	-0.162035	0.03	0.03	1	0.477002	0.018	0.012	1	0.11846	0.018	0.012	0.489822	0.595462	0.012	0.012	1	-1.58883	0.024	0.027	1	0.973946	0.024	0.016	1	-0.61488	0.016	0.027	1	-0.765388
Blmh	-0.132521	0.089	0.092	1	-0.134493	0.089	0.087	1	-0.267014	0.087	0.092	0.128754	0.0154529	0.095	0.08	1	-0.0171892	0.095	0.083	1	-0.00173629	0.083	0.08	1	0.00167662	0.105	0.099	1	0.0746187	0.105	0.075	7.2e-07	0.0762953	0.075	0.099	0.0174965	0.0547767	0.149	0.136	1	0.227347	0.149	0.132	1	0.282123	0.132	0.136	1	-0.0343946
Blnk													-0.0478691	0.154	0.133	1	0.344123	0.154	0.171	1	0.296254	0.171	0.133	1
Bloc1s1																									1.19891	0.01	0.003	1	0.321588	0.01	0.007	1					-0.511225	0.012	0.01	1	-0.907829	0.012	0.003	1	-1.41905	0.003	0.01	1	0.146964
Bloc1s2	0.417795	0.052	0.031	1	-1.34847	0.052	0.022	9.69e-43	-0.930678	0.022	0.031	6.56e-23	-0.229134	0.057	0.053	1	-0.848101	0.057	0.03	1.68e-11	-1.07724	0.03	0.053	8.11e-07	-0.279249	0.034	0.033	1	-0.748197	0.034	0.015	3.52e-16	-1.02745	0.015	0.033	8.99e-16	-0.506413	0.039	0.048	1	-0.463645	0.039	0.017	1	-0.970059	0.017	0.048	1	-0.153392
Bloc1s3
Bloc1s4																																					0.756151	0.018	0.017	1	-3.23021	0.018	0.004	1	-2.47406	0.004	0.017	1
Bloc1s5	3.32e-05	0.051	0.05	1	-0.208643	0.051	0.047	1	-0.20861	0.047	0.05	1	-0.422941	0.021	0.015	1	0.223866	0.021	0.016	1	-0.199075	0.016	0.015	1	-0.0163364	0.02	0.018	1	-0.0427311	0.02	0.012	0.382563	-0.0590675	0.012	0.018	1	-1.94349	0.03	0.071	1	0.731549	0.03	0.033	1	-1.21194	0.033	0.071	1	0.792504
Bloc1s6	0.0517924	0.036	0.034	1	-0.325969	0.036	0.032	0.0675648	-0.274177	0.032	0.034	0.000335492	0.31253	0.012	0.006	1	0.269357	0.012	0.011	1	0.581887	0.011	0.006	1	-0.0570907	0.032	0.027	1	0.0408357	0.032	0.02	0.000115116	-0.016255	0.02	0.027	0.0220028	-0.920355	0.033	0.037	1	-0.271985	0.033	0.013	1	-1.19234	0.013	0.037	1	-0.0250026
Blvra	0.220102	0.046	0.043	1	-0.521454	0.046	0.035	0.153588	-0.301352	0.035	0.043	1	0.300666	0.034	0.024	1	-0.347277	0.034	0.024	1	-0.0466108	0.024	0.024	1	0.506795	0.04	0.027	1	-0.420732	0.04	0.021	2.34e-08	0.0860627	0.021	0.027	1	0.0914139	0.051	0.048	1	-0.46832	0.051	0.036	1	-0.376906	0.036	0.048	1	0.0385018
Blvrb	1.34447	0.013	0.007	1	-1.54854	0.013	0.006	1					0.0334453	0.043	0.031	1	-0.133548	0.043	0.029	0.801708	-0.100103	0.029	0.031	1	0.590684	0.023	0.015	1	-0.226967	0.023	0.013	0.615973	0.363716	0.013	0.015	1	-0.754671	0.065	0.105	1	0.39149	0.065	0.064	1	-0.36318	0.064	0.105	1	0.247423
Blzf1	0.353791	0.101	0.08	1	-0.323731	0.101	0.091	1	0.03006	0.091	0.08	1	-0.129564	0.072	0.067	1	-0.160085	0.072	0.054	0.127627	-0.289649	0.054	0.067	0.0293064	0.189942	0.036	0.028	1	-0.549957	0.036	0.016	4.31e-15	-0.360014	0.016	0.028	1.88e-09	0.0897663	0.065	0.075	1	-0.556039	0.065	0.032	1	-0.466273	0.032	0.075	1	0.561782
Bmerb1
Bmf	1.50543	0.013	0.006	1	-1.34779	0.013	0.005	5.03e-09					0.28828	0.012	0.009	1	0.0844623	0.012	0.009	1					0.860196	0.018	0.01	1	-0.682334	0.018	0.006	1.57e-07	0.177862	0.006	0.01	0.332533	-1.23343	0.015	0.034	1	0.235769	0.015	0.012	1	-0.997658	0.012	0.034	1	0.373336
Bmi1	0.275256	0.059	0.047	1	-1.14751	0.059	0.03	2.58e-15	-0.872258	0.03	0.047	7.45e-23	2.24994	0.018	0.003	1	0.0846463	0.018	0.015	1	2.33458	0.015	0.003	1	0.220613	0.052	0.045	1	0.00267128	0.052	0.032	2.75e-06	0.223284	0.032	0.045	1.94e-05	0.249334	0.018	0.014	1	-0.141876	0.018	0.02	1	0.107458	0.02	0.014	1	1.342
Bmp1	0.234048	0.144	0.108	1	-0.879	0.144	0.095	3.6e-73	-0.644952	0.095	0.108	3.03e-47	0.236717	0.348	0.24	1.45e-10	-0.609667	0.348	0.214	3.91e-47	-0.372951	0.214	0.24	1.59e-05	0.539591	0.072	0.043	0.014746	-0.318488	0.072	0.041	2.21e-31	0.221103	0.041	0.043	2.65e-05	0.587553	0.068	0.031	1	-0.944206	0.068	0.02	0.667601	-0.356654	0.02	0.031	1	0.781715
Bmp10
Bmp15
Bmp2													-0.196319	0.018	0.016	1	0.506654	0.018	0.017	1	0.310334	0.017	0.016	1
Bmp2k	0.124199	0.091	0.082	1	-0.100915	0.091	0.084	0.272713	0.0232838	0.084	0.082	1	0.232224	0.175	0.125	0.00791579	-0.267169	0.175	0.119	2.36e-10	-0.0349448	0.119	0.125	1	-0.0907638	0.088	0.073	1	-0.0669837	0.088	0.055	1.48e-10	-0.157748	0.055	0.073	0.00471211	0.125404	0.158	0.116	1	-0.614707	0.158	0.077	0.76082	-0.489304	0.077	0.116	1	1.9411
Bmp3
Bmp4													0.243839	0.16	0.112	0.000133873	-0.753841	0.16	0.087	1.36e-29	-0.510002	0.087	0.112	0.00485522	0.247788	0.014	0.011	1	-0.220267	0.014	0.007	0.000101496	0.0275207	0.007	0.011	1	1.57053	0.015	0.01	1	-0.0418783	0.015	0.017	1	1.52865	0.017	0.01	1	0.0278016
Bmp5																																					-1.18969	0.018	0.017	1	-1.22682	0.018	0.003	1	-2.41651	0.003	0.017	1
Bmp6													0.16079	0.446	0.364	0.000105818	0.0613608	0.446	0.405	1	0.22215	0.405	0.364	0.241909	-0.11349	0.515	0.488	1	0.367727	0.515	0.507	0.0612677	0.254237	0.507	0.488	0.642639	-0.474359	0.652	0.684	1	0.460064	0.652	0.681	1	-0.0142952	0.681	0.684	1	-0.433734
Bmp7	-1.12658	0.009	0.018	0.0120098					-1.11891	0.009	0.018	5.85e-05
Bmp8a
Bmp8b					1.40007	0.007	0.018	3.99e-09	1.66037	0.018	0.005	3.33e-08
Bmper	-0.758299	0.01	0.019	0.000808508	0.579511	0.01	0.017	1	-0.178789	0.017	0.019	1	-0.346467	0.5	0.519	0.00110714	0.516852	0.5	0.564	6.37e-22	0.170385	0.564	0.519	0.695895													0.0932411	0.036	0.024	1	-0.565913	0.036	0.01	1	-0.472672	0.01	0.024	1
Bmpr1a	0.0107314	0.763	0.748	1	0.39986	0.763	0.859	1.59e-145	0.410591	0.859	0.748	5.92e-152	0.000153394	0.298	0.247	0.337225	0.20933	0.298	0.286	1	0.209483	0.286	0.247	1													-0.212491	0.396	0.384	1	0.570789	0.396	0.384	1	0.358298	0.384	0.384	1	5.15135
Bmpr1b	-0.674705	0.017	0.024	1	0.45234	0.017	0.022	1	-0.222366	0.022	0.024	1																									2.94435	0.012	0	1	-2.40303	0.012	0.001	1
Bmpr2	0.123765	0.314	0.293	1	-0.104665	0.314	0.317	1	0.0190998	0.317	0.293	1	0.13499	0.42	0.338	0.000230068	-0.00407665	0.42	0.368	0.689924	0.130914	0.368	0.338	1	0.0321213	0.418	0.364	1	0.317717	0.418	0.377	1	0.349838	0.377	0.364	1	-0.0427898	0.676	0.639	1	0.393902	0.676	0.706	1	0.351112	0.706	0.639	1	-0.174613
Bms1	0.269159	0.18	0.139	3.17e-08	-0.578012	0.18	0.135	4.03e-39	-0.308854	0.135	0.139	2.52e-06	0.0121263	0.069	0.059	1	-0.176303	0.069	0.051	5.6e-07	-0.164177	0.051	0.059	1	-0.223222	0.064	0.055	1	-0.00664543	0.064	0.036	1.73e-21	-0.229868	0.036	0.055	1.52e-13	0.178053	0.089	0.071	1	-0.170893	0.089	0.055	1	0.00715948	0.055	0.071	1	0.537936
Bmt2	-0.148083	0.181	0.189	1	0.498842	0.181	0.241	8.94e-27	0.350758	0.241	0.189	1.54e-11	-0.0325476	0.151	0.126	1	0.463607	0.151	0.162	1	0.43106	0.162	0.126	1	-0.00699759	0.101	0.089	1	0.588323	0.101	0.091	1	0.581325	0.091	0.089	1	-0.124442	0.116	0.129	1	0.791391	0.116	0.154	1	0.666948	0.154	0.129	1	0.200123
Bmx																									1.3026	0.01	0.005	1	-0.379329	0.01	0.004	1					-0.346202	0.562	0.588	1	0.203889	0.562	0.486	1	-0.142313	0.486	0.588	1	0.120484
Bmyc	-0.449006	0.016	0.019	1	-0.0538791	0.016	0.017	1	-0.502885	0.017	0.019	0.153486	-0.322561	0.013	0.014	1	-0.211606	0.013	0.01	1	-0.534167	0.01	0.014	1	-0.42232	0.009	0.011	1					-0.00513416	0.007	0.011	1	-2.0471	0.006	0.027	1	1.99611	0.006	0.023	1	-0.0509901	0.023	0.027	1
Bnc1
Bnc2	-0.11737	0.071	0.076	1	0.639725	0.071	0.109	0.04317	0.522355	0.109	0.076	0.00101841	-0.00682221	0.468	0.397	1	0.13305	0.468	0.408	1	0.126228	0.408	0.397	1													0.123792	0.11	0.088	1	-0.0242929	0.11	0.074	1	0.099499	0.074	0.088	1	3.738
Bnip1	0.384052	0.172	0.127	3.05e-08	-0.524715	0.172	0.133	9.96e-26	-0.140663	0.133	0.127	1	0.506774	0.04	0.023	1	-0.0192492	0.04	0.035	1	0.487525	0.035	0.023	1	1.41441	0.027	0.011	1	0.0858945	0.027	0.021	0.00299329	1.5003	0.021	0.011	1	0.658632	0.048	0.031	1	-0.419822	0.048	0.023	1	0.23881	0.023	0.031	1	-0.270266
Bnip2	0.47301	0.132	0.097	1	-1.05501	0.132	0.071	1.08e-14	-0.581998	0.071	0.097	0.000291085	0.363164	0.106	0.07	1	-0.117538	0.106	0.085	1	0.245626	0.085	0.07	1	0.00506754	0.166	0.151	1	-0.019529	0.166	0.112	1.27e-08	-0.0144614	0.112	0.151	7.62e-06	0.0475991	0.256	0.228	1	-0.0106865	0.256	0.201	1	0.0369126	0.201	0.228	1	-0.476201
Bnip3	0.231521	0.208	0.183	0.984843	-0.450242	0.208	0.186	8.48e-05	-0.218721	0.186	0.183	1					2.09059	0.009	0.021	1	1.94936	0.021	0.006	1	1.0605	0.051	0.024	0.114118	-0.348686	0.051	0.027	1.19e-13	0.711819	0.027	0.024	1	0.174662	0.027	0.024	1	1.59775	0.027	0.032	1	1.77241	0.032	0.024	1	1.38788
Bnip3l	0.236963	0.135	0.114	1	-0.241326	0.135	0.122	1	-0.00436367	0.122	0.114	1	0.194151	0.077	0.055	1	-0.332255	0.077	0.048	4.2e-07	-0.138104	0.048	0.055	1	-0.0745436	0.096	0.086	1	-0.174284	0.096	0.056	1.61e-16	-0.248827	0.056	0.086	7.5e-14	-0.651093	0.116	0.15	1	-0.292225	0.116	0.071	1	-0.943318	0.071	0.15	1	-0.583502
Bnipl																																					-0.472732	0.006	0.01	1					-0.682523	0.004	0.01	1
Boc													0.58631	0.19	0.114	4.13e-14	-0.428395	0.19	0.12	1.4e-17	0.157915	0.12	0.114	1	0.256919	0.056	0.044	1	-0.372315	0.056	0.033	3.49e-09	-0.115396	0.033	0.044	0.108953	-0.301732	0.11	0.105	1	0.190803	0.11	0.096	1	-0.110929	0.096	0.105	1	-0.723247
Bod1	0.224999	0.018	0.013	1	-0.84792	0.018	0.009	1	-0.622921	0.009	0.013	1													-0.564523	0.011	0.013	1	0.348477	0.011	0.007	1	-0.216046	0.007	0.013	1	2.21809	0.024	0.01	1	-3.6713	0.024	0.001	1	-1.45321	0.001	0.01	1	-1.18118
Bod1l	0.0853336	0.32	0.287	1	-0.754811	0.32	0.217	7.72e-105	-0.669477	0.217	0.287	2.23e-68	-0.107648	0.238	0.206	1	-0.293083	0.238	0.167	6.94e-17	-0.40073	0.167	0.206	5.63e-07	0.137684	0.223	0.18	0.409076	-0.360517	0.223	0.125	1.76e-50	-0.222833	0.125	0.18	6.43e-20	-0.091326	0.289	0.286	1	-0.162804	0.289	0.202	1	-0.25413	0.202	0.286	1	0.127656
Bok													-0.187758	0.025	0.02	1	0.392287	0.025	0.025	1	0.204529	0.025	0.02	1	-0.174252	0.039	0.037	1	0.0102804	0.039	0.025	0.468543	-0.163972	0.025	0.037	1	-0.905918	0.015	0.01	1	0.0536784	0.015	0.009	1	-0.85224	0.009	0.01	1
Bola1																													1.75393	0.006	0.01	1	0.748258	0.01	0.008	1					0.785668	0.003	0.01	1	0.153791	0.01	0.007	1	-0.739445
Bola2																									0.407895	0.027	0.02	1	-0.283636	0.027	0.012	1	0.124259	0.012	0.02	1					1.70906	0.009	0.015	1	0.869156	0.015	0.007	1	-0.0584608
Bola3	-0.00256758	0.09	0.088	1	-2.37971	0.09	0.02	4.65e-26	-2.38227	0.02	0.088	2.15e-46	-0.800184	0.012	0.016	1	-3.53115	0.012	0.001	0.189607	-4.33134	0.001	0.016	8.35e-10	0.159031	0.033	0.028	1	-0.809248	0.033	0.011	0.1597	-0.650217	0.011	0.028	3.19e-06	1.11342	0.024	0.017	1	-1.89847	0.024	0.006	1	-0.785055	0.006	0.017	1	0.106469
Boll																																																	1.34057
Bop1	0.0557374	0.038	0.033	1	-0.517116	0.038	0.026	1.21e-07	-0.461378	0.026	0.033	0.0812362	-0.28652	0.025	0.023	1	0.0163329	0.025	0.019	1	-0.270187	0.019	0.023	1	-0.33859	0.023	0.024	1	-0.212886	0.023	0.015	0.0149743	-0.551476	0.015	0.024	0.000333763	-0.18189	0.033	0.024	1	-0.542832	0.033	0.013	1	-0.724722	0.013	0.024	1	-0.00928322
Bora	0.34193	0.034	0.027	1	-0.107346	0.034	0.032	1	0.234584	0.032	0.027	1	0.0337277	0.014	0.01	1	0.5481	0.014	0.014	1	0.581827	0.014	0.01	1	0.0239719	0.012	0.013	1	0.552691	0.012	0.012	1	0.576663	0.012	0.013	1	-2.39611	0.015	0.048	1	0.899232	0.015	0.017	1	-1.49688	0.017	0.048	1
Borcs5	-0.091618	0.098	0.1	1	-0.00675521	0.098	0.103	1	-0.0983732	0.103	0.1	1	0.111089	0.057	0.044	1	-0.162451	0.057	0.044	0.0156112	-0.0513623	0.044	0.044	1	0.514675	0.035	0.02	1	-0.287665	0.035	0.019	8.32e-07	0.227009	0.019	0.02	1	0.971683	0.042	0.031	1	-0.981841	0.042	0.026	1	-0.0101589	0.026	0.031	1	0.817423
Borcs6																																					-0.159382	0.006	0.01	1					1.08114	0.009	0.01	1
Borcs7	0.0815096	0.115	0.112	1	-0.687256	0.115	0.085	2.32e-19	-0.605746	0.085	0.112	1.28e-24	0.247195	0.035	0.025	1	-0.824938	0.035	0.018	3.85e-07	-0.577743	0.018	0.025	1	1.42945	0.018	0.007	1	-1.15514	0.018	0.006	8.09e-13					0.663455	0.036	0.034	1	-0.137667	0.036	0.026	1	0.525787	0.026	0.034	1	0.313941
Borcs8
Bpgm	-0.109363	0.021	0.019	1	-0.125808	0.021	0.019	1	-0.235172	0.019	0.019	1	-0.316119	0.014	0.013	1	-0.172544	0.014	0.009	1	-0.488662	0.009	0.013	1	-0.387329	0.011	0.012	1	-1.01356	0.011	0.003	0.184367	-1.40089	0.003	0.012	4.78e-05	-0.227194	0.027	0.031	1	-0.316145	0.027	0.016	1	-0.543338	0.016	0.031	1	1.57698
Bphl	-0.0825301	0.137	0.143	1	-0.223599	0.137	0.127	0.627485	-0.306129	0.127	0.143	2.24e-09	-0.595658	0.03	0.033	1	0.604751	0.03	0.034	1	0.00909333	0.034	0.033	1	-0.206532	0.015	0.012	1	0.15379	0.015	0.007	1.04e-06	-0.0527422	0.007	0.012	1.3e-06	-1.21111	0.018	0.041	1	0.598815	0.018	0.019	1	-0.612291	0.019	0.041	1	-0.654001
Bpi
Bpifa1
Bpifa2
Bpifa3
Bpifa5
Bpifa6
Bpifb1
Bpifb2
Bpifb3
Bpifb4
Bpifb5
Bpifb6
Bpifb9a
Bpifb9b
Bpifc
Bpnt1	0.0466414	0.092	0.089	1	-0.291929	0.092	0.082	1	-0.245287	0.082	0.089	0.0143543	0.627986	0.015	0.009	1	-0.574823	0.015	0.01	0.0468328	0.0531635	0.01	0.009	1	-0.0958091	0.017	0.015	1	-0.0920096	0.017	0.01	0.0677278	-0.187819	0.01	0.015	0.0235821	-0.666989	0.03	0.031	1	0.10135	0.03	0.012	1	-0.565639	0.012	0.031	1	0.461147
Bptf	0.191678	0.467	0.416	1.07e-06	-0.557212	0.467	0.397	1.01e-77	-0.365533	0.397	0.416	3.31e-31	-0.00273688	0.429	0.362	1	-0.378227	0.429	0.32	2.45e-32	-0.380964	0.32	0.362	1.63e-11	0.0683356	0.366	0.315	1	-0.198787	0.366	0.258	1.65e-34	-0.130451	0.258	0.315	7.9e-16	0.377903	0.435	0.374	1	-0.28573	0.435	0.332	1	0.0921731	0.332	0.374	1	-0.21325
Braf	0.0271096	0.495	0.481	1	0.24283	0.495	0.584	8.53e-37	0.26994	0.584	0.481	1.26e-33	0.0513671	0.362	0.295	1	0.443294	0.362	0.397	0.0609707	0.494661	0.397	0.295	1.71e-10	-0.0355112	0.304	0.263	1	0.511655	0.304	0.294	1	0.476144	0.294	0.263	1	-0.34711	0.411	0.446	1	0.506762	0.411	0.392	1	0.159652	0.392	0.446	1	0.192378
Brap	0.505353	0.108	0.076	0.000481854	-0.578179	0.108	0.083	8.57e-20	-0.0728267	0.083	0.076	0.464927	0.378779	0.117	0.078	0.00416538	-0.784967	0.117	0.059	9.33e-28	-0.406189	0.059	0.078	0.000397762	0.335643	0.09	0.072	1	-0.328737	0.09	0.054	5.61e-19	0.00690675	0.054	0.072	8.31e-07	0.0717981	0.134	0.146	1	-0.560514	0.134	0.071	1	-0.488716	0.071	0.146	0.351493	0.0103564
Brat1	0.0666097	0.035	0.034	1	-0.470343	0.035	0.031	6.4e-05	-0.403733	0.031	0.034	0.5141	0.217629	0.043	0.03	1	-0.602149	0.043	0.023	1.72e-07	-0.384521	0.023	0.03	1	-0.29863	0.023	0.024	1	-0.325372	0.023	0.013	9.91e-05	-0.624002	0.013	0.024	1.07e-06	-0.437679	0.06	0.078	1	-1.44981	0.06	0.022	1	-1.88748	0.022	0.078	0.85252	-0.933708
Brca1																																					3.17165	0.012	0.003	1	-1.47739	0.012	0.003	1
Brca2	0.0125323	0.062	0.06	1	-0.221473	0.062	0.052	0.241085	-0.20894	0.052	0.06	0.93649	0.781824	0.025	0.015	1	-0.102116	0.025	0.02	1	0.679708	0.02	0.015	1	0.273843	0.021	0.011	1	-0.310087	0.021	0.01	2.13e-05	-0.0362444	0.01	0.011	1	-0.0135989	0.018	0.01	1	0.968227	0.018	0.016	1	0.954628	0.016	0.01	1	-1.96661
Brcc3	-0.110193	0.104	0.111	1	0.368518	0.104	0.14	9.14e-13	0.258325	0.14	0.111	0.00106493	-0.0154764	0.088	0.072	1	0.338328	0.088	0.086	1	0.322852	0.086	0.072	1	-0.0075214	0.064	0.06	1	0.239015	0.064	0.05	1	0.231493	0.05	0.06	1	0.0305671	0.113	0.099	1	0.504624	0.113	0.096	1	0.535191	0.096	0.099	1	0.275779
Brd1	0.259221	0.317	0.27	2.29e-10	-0.721528	0.317	0.234	8.82e-100	-0.462307	0.234	0.27	1.3e-38	0.385103	0.268	0.176	6.83e-16	-0.635598	0.268	0.152	6.65e-60	-0.250496	0.152	0.176	3.94e-06	0.149102	0.247	0.204	0.214213	-0.372362	0.247	0.145	2.43e-54	-0.223261	0.145	0.204	6.98e-22	0.412977	0.339	0.289	1	-0.705618	0.339	0.207	0.0434477	-0.292641	0.207	0.289	1	0.423497
Brd2	0.621834	0.227	0.141	3e-35	-0.987777	0.227	0.123	2.04e-121	-0.365943	0.123	0.141	1.68e-21	0.285526	0.098	0.071	1	-0.337258	0.098	0.065	4.17e-16	-0.0517323	0.065	0.071	0.107699	0.231921	0.107	0.086	1	-0.509539	0.107	0.05	8.26e-41	-0.277618	0.05	0.086	1.83e-21	0.189944	0.182	0.122	1	-1.18255	0.182	0.06	1.1e-05	-0.992605	0.06	0.122	1	-0.607686
Brd3	0.272847	0.188	0.152	0.0951458	-0.790835	0.188	0.122	3.91e-63	-0.517988	0.122	0.152	8.35e-33	0.318468	0.144	0.095	0.000239498	-0.711077	0.144	0.074	6.25e-39	-0.392609	0.074	0.095	2.05e-08	0.0617528	0.097	0.079	1	-0.668359	0.097	0.041	1.74e-46	-0.606606	0.041	0.079	5.77e-30	-0.175591	0.164	0.136	1	-0.800853	0.164	0.074	0.0713671	-0.976444	0.074	0.136	1	0.123178
Brd3os
Brd4	0.0362627	0.471	0.446	1	-0.0878153	0.471	0.493	1	-0.0515526	0.493	0.446	1	0.147351	0.422	0.337	0.000692378	-0.0526812	0.422	0.376	0.00178802	0.09467	0.376	0.337	1	0.0733538	0.364	0.304	1	0.246855	0.364	0.316	1	0.320208	0.316	0.304	1	-0.145489	0.417	0.435	1	0.177036	0.417	0.373	1	0.0315466	0.373	0.435	1	0.0808097
Brd7	-0.0551585	0.264	0.259	1	-0.254547	0.264	0.241	0.00671851	-0.309706	0.241	0.259	6.68e-08	0.0201406	0.159	0.122	1	-0.164835	0.159	0.117	9.84e-07	-0.144695	0.117	0.122	1	0.253601	0.117	0.088	1	-0.083334	0.117	0.078	3.18e-11	0.170267	0.078	0.088	0.000568429	-0.309171	0.14	0.16	1	0.0353656	0.14	0.099	1	-0.273805	0.099	0.16	1	1.05393
Brd8	0.0713816	0.213	0.2	1	-0.343755	0.213	0.197	1.01e-05	-0.272373	0.197	0.2	0.0740442	-0.112892	0.201	0.178	1	-0.131533	0.201	0.161	2.49e-07	-0.244425	0.161	0.178	0.140485	-0.048053	0.154	0.133	1	0.0996441	0.154	0.117	6.47e-08	0.0515911	0.117	0.133	0.155495	-0.801828	0.167	0.248	1	0.417765	0.167	0.175	1	-0.384063	0.175	0.248	1	0.518132
Brd9	0.494328	0.18	0.125	4.59e-12	-0.71639	0.18	0.123	2.91e-72	-0.222061	0.123	0.125	7.47e-21	0.483798	0.12	0.067	0.000367357	-0.297481	0.12	0.079	4.24e-17	0.186317	0.079	0.067	1	0.0600731	0.091	0.076	1	-0.00108857	0.091	0.06	4.05e-17	0.0589845	0.06	0.076	3.16e-11	0.51664	0.149	0.099	1	-0.603962	0.149	0.066	0.294095	-0.0873222	0.066	0.099	1	-0.631102
Brdt	1.29969	0.026	0.013	0.0736822	-0.689565	0.026	0.017	2.6e-06	0.610126	0.017	0.013	1	-0.44614	0.106	0.112	1	-0.0722765	0.106	0.082	0.499445	-0.518417	0.082	0.112	0.000474364	0.696369	0.021	0.013	1	-0.348326	0.021	0.01	1.25e-05	0.348043	0.01	0.013	1	0.0961084	0.065	0.071	1	-0.509786	0.065	0.035	1	-0.413678	0.035	0.071	1	0.711016
Brf1	0.0876559	0.217	0.198	1	-0.363462	0.217	0.189	2.26e-16	-0.275806	0.189	0.198	3.43e-09	0.212295	0.161	0.121	0.0640323	-0.499776	0.161	0.098	2.13e-22	-0.287481	0.098	0.121	0.0035687	0.174257	0.098	0.075	1	-0.175212	0.098	0.063	3.38e-20	-0.000955269	0.063	0.075	4.47e-08	-0.0515688	0.149	0.163	1	-0.476648	0.149	0.098	1	-0.528217	0.098	0.163	1	-0.602895
Brf2	-0.178484	0.014	0.014	1	-1.51132	0.014	0.005	2.3e-14	-1.6898	0.005	0.014	1.82e-15	-0.402208	0.012	0.013	1	-0.360692	0.012	0.008	1	-0.7629	0.008	0.013	1	-0.5887	0.011	0.011	1	-0.849101	0.011	0.003	0.000325218	-1.4378	0.003	0.011	5.95e-05	-0.297156	0.036	0.034	1	0.434817	0.036	0.029	1	0.137661	0.029	0.034	1	-0.219853
Bri3	0.185795	0.282	0.24	1	0.412399	0.282	0.37	1.21e-55	0.598193	0.37	0.24	1.5e-70	0.113934	0.086	0.056	1	0.252595	0.086	0.08	1	0.36653	0.08	0.056	1	0.412042	0.084	0.062	1	0.209866	0.084	0.059	2.68e-05	0.621908	0.059	0.062	0.000423436	0.398612	0.116	0.082	1	0.225742	0.116	0.095	1	0.624355	0.095	0.082	1	0.685205
Bri3bp	-0.394378	0.263	0.307	2.31e-30	0.35974	0.263	0.341	2.1e-35	-0.0346384	0.341	0.307	1
Bricd5
Brinp1
Brinp2
Brinp3																																					-3.47036	0	0.01	1					-2.50954	0.001	0.01	1
Brip1													-0.225004	0.014	0.013	1	0.148277	0.014	0.014	1	-0.0767268	0.014	0.013	1	0.547744	0.05	0.029	0.019711	-0.741924	0.05	0.021	1.43e-17	-0.19418	0.021	0.029	1	-0.968767	0.009	0.02	1	0.785905	0.009	0.015	1	-0.182862	0.015	0.02	1
Brix1	0.438184	0.056	0.041	1	-0.372667	0.056	0.046	0.000516995	0.0655168	0.046	0.041	1	0.0311844	0.057	0.042	1	0.25547	0.057	0.055	1	0.286654	0.055	0.042	1	-0.176517	0.032	0.032	1	0.42963	0.032	0.031	1	0.253112	0.031	0.032	1	-0.970073	0.039	0.048	1	0.771283	0.039	0.039	1	-0.19879	0.039	0.048	1	0.294628
Brk1	-0.131081	0.115	0.127	0.626851	-0.465414	0.115	0.091	5.54e-12	-0.596495	0.091	0.127	4.06e-34	0.203174	0.105	0.075	1	-0.894811	0.105	0.048	2.33e-28	-0.691637	0.048	0.075	6.74e-12	-0.0290007	0.087	0.085	1	-0.28866	0.087	0.05	1.41e-21	-0.31766	0.05	0.085	4.78e-26	0.77416	0.134	0.068	1	-0.507186	0.134	0.058	1	0.266974	0.058	0.068	1	0.340455
Brms1	0.508715	0.051	0.033	1	-1.04595	0.051	0.026	7.73e-18	-0.537237	0.026	0.033	6.11e-08	-0.290429	0.033	0.03	1	-0.216037	0.033	0.022	0.0106505	-0.506466	0.022	0.03	1	-0.0863537	0.045	0.041	1	-0.55451	0.045	0.021	7.72e-14	-0.640863	0.021	0.041	1.72e-09	0.196425	0.083	0.071	1	-1.30234	0.083	0.028	1	-1.10592	0.028	0.071	1	0.257784
Brms1l	0.0737399	0.16	0.146	1	-0.185351	0.16	0.152	1	-0.111611	0.152	0.146	1	0.32156	0.1	0.064	0.25122	-0.141463	0.1	0.075	0.000814753	0.180097	0.075	0.064	1	0.413205	0.061	0.043	1	-0.184886	0.061	0.036	1.06e-08	0.228319	0.036	0.043	0.0822277	-1.36227	0.054	0.078	1	0.628041	0.054	0.057	1	-0.734232	0.057	0.078	1	2.57601
Brox	0.181061	0.127	0.112	1	0.0448658	0.127	0.14	1	0.225927	0.14	0.112	1	0.121276	0.109	0.082	1	0.0390449	0.109	0.087	0.53732	0.160321	0.087	0.082	1	0.0298331	0.105	0.088	1	-0.0397697	0.105	0.067	1.02e-15	-0.00993656	0.067	0.088	0.000295554	-0.00805339	0.092	0.099	1	-0.315724	0.092	0.073	1	-0.323777	0.073	0.099	1	0.979968
Brpf1	0.230938	0.093	0.078	0.152198	-0.735427	0.093	0.062	1.5e-38	-0.504489	0.062	0.078	4.71e-15	-0.0153105	0.046	0.035	1	-0.553498	0.046	0.026	8.56e-10	-0.568809	0.026	0.035	0.205546	0.224564	0.055	0.04	1	-0.00113425	0.055	0.034	7.86e-12	0.22343	0.034	0.04	0.145696	0.0861206	0.06	0.044	1	-0.571567	0.06	0.028	1	-0.485446	0.028	0.044	1	0.913197
Brpf3	0.739334	0.115	0.076	1.77e-14	-0.699181	0.115	0.081	5.37e-41	0.0401531	0.081	0.076	0.0184897	0.22705	0.114	0.079	0.143044	-0.741096	0.114	0.056	5.7e-29	-0.514046	0.056	0.079	6.24e-07	0.506378	0.049	0.03	1	-0.460965	0.049	0.024	2.42e-22	0.0454132	0.024	0.03	0.00133384	-0.680947	0.086	0.092	1	0.0983791	0.086	0.057	1	-0.582568	0.057	0.092	1	1.09544
Brs3
Brsk1													0.00445439	0.106	0.089	1	-0.343064	0.106	0.07	8.34e-07	-0.338609	0.07	0.089	1													3.92201	0.015	0	1	-1.15086	0.015	0.006	1					-1.56239
Brsk2
Brwd1	0.0962239	0.625	0.592	0.0572783	-0.0957734	0.625	0.651	1	0.000450421	0.651	0.592	1	-0.0594572	0.384	0.341	1	0.142981	0.384	0.375	1	0.0835242	0.375	0.341	1	0.0758822	0.257	0.221	1	0.250118	0.257	0.223	1.15e-05	0.326	0.223	0.221	1	-0.0925034	0.354	0.374	1	0.277292	0.354	0.355	1	0.184788	0.355	0.374	1	0.090281
Brwd3	0.0228464	0.205	0.191	1	0.132782	0.205	0.213	1	0.155629	0.213	0.191	1	0.194269	0.117	0.086	1	0.271028	0.117	0.116	1	0.465297	0.116	0.086	1	0.079103	0.09	0.076	1	0.44614	0.09	0.08	1	0.525243	0.08	0.076	1	-0.0290143	0.176	0.163	1	0.0908309	0.176	0.146	1	0.0618166	0.146	0.163	1	0.40603
Bscl2	-0.117463	0.043	0.046	1	-0.780244	0.043	0.028	0.00465366	-0.897707	0.028	0.046	0.000103156	0.196585	0.037	0.025	1	-0.523383	0.037	0.022	0.0029208	-0.326798	0.022	0.025	1	0.523622	0.023	0.013	1	-0.371981	0.023	0.011	0.00205956	0.151641	0.011	0.013	1	-0.229681	0.033	0.037	1	-0.0908403	0.033	0.019	1	-0.320522	0.019	0.037	1	0.999871
Bsdc1	0.62268	0.181	0.128	5.78e-23	-1.03969	0.181	0.102	5.35e-86	-0.417006	0.102	0.128	1.14e-14	0.0448901	0.076	0.059	1	-0.645014	0.076	0.039	1.32e-19	-0.600124	0.039	0.059	6.79e-07	0.146573	0.1	0.087	1	0.221375	0.1	0.089	1	0.367948	0.089	0.087	1	-0.319987	0.089	0.105	1	-0.255133	0.089	0.064	1	-0.57512	0.064	0.105	1	0.376266
Bsg	0.699369	0.242	0.152	3.39e-16	-1.51661	0.242	0.109	1e-38	-0.817245	0.109	0.152	1	-1.17984	0.017	0.036	1	-0.298088	0.017	0.01	0.811002	-1.47793	0.01	0.036	2.62e-06	-0.487915	0.119	0.134	0.0195067	0.565641	0.119	0.101	1	0.0777257	0.101	0.134	2.82e-06	-0.807857	0.095	0.16	1	1.06526	0.095	0.172	1	0.257404	0.172	0.16	1	-1.82567
Bsn
Bsnd
Bsph1
Bsph2
Bspry
Bst1																																					2.4625	0.012	0.003	1	-0.708232	0.012	0.01	1	1.75427	0.01	0.003	1
Bst2													-0.520831	0.034	0.032	1	-0.594331	0.034	0.017	0.00579304	-1.11516	0.017	0.032	0.432322	-0.0615238	0.122	0.117	1	-0.141386	0.122	0.079	8.15e-08	-0.202909	0.079	0.117	3.36e-06	0.0128552	0.083	0.071	1	0.34102	0.083	0.076	1	0.353875	0.076	0.071	1	-0.965601
Bsx
Btaf1	-0.0182942	0.388	0.382	1	0.137525	0.388	0.444	1.77e-07	0.119231	0.444	0.382	0.00672543	0.00755607	0.269	0.227	1	0.294573	0.269	0.273	1	0.302129	0.273	0.227	1	0.130003	0.206	0.171	1	0.607681	0.206	0.218	1	0.737684	0.218	0.171	0.0368121	0.330369	0.318	0.245	1	0.145189	0.318	0.274	1	0.475558	0.274	0.245	1	0.650297
Btbd1	-0.231905	0.267	0.292	1.19e-06	-0.0130331	0.267	0.286	1	-0.244938	0.286	0.292	0.00464051	-0.0470149	0.231	0.194	1	-0.141651	0.231	0.18	6.4e-08	-0.188665	0.18	0.194	1	-0.25061	0.186	0.184	1	0.0181067	0.186	0.137	1.53e-08	-0.232504	0.137	0.184	2.23e-16	-0.296657	0.211	0.252	1	0.0606523	0.211	0.173	1	-0.236005	0.173	0.252	1	0.260748
Btbd10	-0.118318	0.109	0.11	1	0.623102	0.109	0.163	3.45e-33	0.504783	0.163	0.11	5.16e-17	0.141065	0.137	0.105	1	0.370209	0.137	0.145	1	0.511273	0.145	0.105	1	0.171343	0.108	0.081	1	0.45558	0.108	0.095	1	0.626923	0.095	0.081	1	-0.377651	0.122	0.133	1	0.748132	0.122	0.135	1	0.370481	0.135	0.133	1	0.432422
Btbd11	-0.26725	0.198	0.22	7.94e-06	-0.544305	0.198	0.144	7.36e-31	-0.811555	0.144	0.22	1.64e-79	-0.531339	0.05	0.056	1	0.589211	0.05	0.057	1	0.0578718	0.057	0.056	1													1.93547	0.036	0.003	1	-0.501849	0.036	0.015	1	1.43362	0.015	0.003	1	0.605752
Btbd16	0.076183	0.026	0.024	1	-0.440273	0.026	0.017	0.0126762	-0.36409	0.017	0.024	0.00593406
Btbd17
Btbd18
Btbd19													0.235211	0.043	0.025	1	-0.435326	0.043	0.023	7.43e-07	-0.200116	0.023	0.025	1	1.02282	0.014	0.007	1	0.169102	0.014	0.011	1	1.19193	0.011	0.007	1	2.48221	0.021	0.007	1	0.244214	0.021	0.015	1	2.72642	0.015	0.007	1	2.7389
Btbd2	0.159721	0.083	0.071	1	-1.24809	0.083	0.037	1.49e-54	-1.08837	0.037	0.071	3.68e-40	-0.0557407	0.056	0.047	1	-0.690485	0.056	0.026	1.74e-14	-0.746226	0.026	0.047	1.39e-09	-0.239487	0.031	0.029	1	-0.67851	0.031	0.013	5.82e-16	-0.917997	0.013	0.029	1.06e-09	-0.125254	0.039	0.041	1	-0.498693	0.039	0.02	1	-0.623947	0.02	0.041	1	-0.0412041
Btbd3	-0.0539004	0.095	0.108	1	-0.327318	0.095	0.088	0.0735856	-0.381219	0.088	0.108	0.000606355	-0.121467	0.127	0.113	1	-0.0603063	0.127	0.099	3.56e-05	-0.181773	0.099	0.113	1	0.276669	0.177	0.126	0.00033897	-0.995579	0.177	0.06	5.74e-103	-0.71891	0.06	0.126	1.85e-43	-0.110538	0.152	0.136	1	-0.472349	0.152	0.073	1	-0.582887	0.073	0.136	1	0.945274
Btbd35f1
Btbd35f1
Btbd35f10
Btbd35f11
Btbd35f12
Btbd35f13
Btbd35f14
Btbd35f15
Btbd35f16
Btbd35f17
Btbd35f18
Btbd35f2
Btbd35f20
Btbd35f21
Btbd35f23
Btbd35f24
Btbd35f25
Btbd35f26
Btbd35f27
Btbd35f28
Btbd35f29
Btbd35f3
Btbd35f4
Btbd35f6
Btbd35f7
Btbd35f8
Btbd6	0.492189	0.031	0.018	1	-0.829691	0.031	0.017	6.65e-05	-0.337502	0.017	0.018	0.00914988
Btbd7	0.0210827	0.459	0.441	1	0.0367455	0.459	0.491	0.217533	0.0578283	0.491	0.441	1	-0.0977852	0.366	0.317	1	0.235402	0.366	0.353	1	0.137617	0.353	0.317	1	0.0276339	0.355	0.309	1	0.198535	0.355	0.3	1	0.226169	0.3	0.309	1	0.127264	0.408	0.344	1	0.344811	0.408	0.371	1	0.472074	0.371	0.344	1	-0.249978
Btbd8	0.366683	0.067	0.044	1.47e-09	0.380473	0.067	0.106	4.85e-18	0.747156	0.106	0.044	8.55e-65	-0.0777997	0.043	0.036	1	0.645373	0.043	0.063	1	0.567573	0.063	0.036	0.00073286	0.071049	0.013	0.01	1	1.24556	0.013	0.032	6.36e-05	1.31661	0.032	0.01	1.63e-09	1.56983	0.015	0.007	1	0.813895	0.015	0.039	1	2.38373	0.039	0.007	1	0.133648
Btbd9	-0.101532	0.606	0.616	0.00703088	0.00641568	0.606	0.651	1	-0.095116	0.651	0.616	1	0.105309	0.365	0.287	0.00187013	-0.16234	0.365	0.297	5.84e-15	-0.0570311	0.297	0.287	1	-0.0824	0.461	0.419	1	0.0532925	0.461	0.386	2.21e-05	-0.0291075	0.386	0.419	0.0336409	2.41e-05	0.56	0.503	1	0.222669	0.56	0.56	1	0.222693	0.56	0.503	1	0.122665
Btc	-0.424845	0.036	0.046	1	0.222674	0.036	0.043	1	-0.202171	0.043	0.046	1
Btd	0.277334	0.023	0.021	1	-0.421707	0.023	0.02	1	-0.144373	0.02	0.021	1	-0.485741	0.036	0.037	1	-0.0861403	0.036	0.024	0.628397	-0.571881	0.024	0.037	1	0.12156	0.025	0.02	1	-0.657687	0.025	0.01	1.72e-10	-0.536127	0.01	0.02	3.8e-05	-0.811591	0.018	0.034	1	0.458635	0.018	0.023	1	-0.352956	0.023	0.034	1	-0.608383
Btf3	1.01679	0.051	0.026	4.18e-17	-2.05855	0.051	0.013	1	-1.04175	0.013	0.026	1.92e-09	0.0809323	0.037	0.033	1	0.511677	0.037	0.047	1	0.592609	0.047	0.033	1	-0.283542	0.042	0.04	1	1.08	0.042	0.063	0.000104164	0.796459	0.063	0.04	1.85e-06	0.0858351	0.039	0.058	1	0.776073	0.039	0.076	1	0.861908	0.076	0.058	1	-0.684808
Btf3l4	0.00330191	0.13	0.127	1	0.582847	0.13	0.199	6.27e-38	0.586149	0.199	0.127	3.42e-26	0.209199	0.058	0.04	1	0.588681	0.058	0.072	1	0.79788	0.072	0.04	0.283058	-0.232296	0.039	0.039	1	0.868224	0.039	0.046	1	0.635927	0.046	0.039	1	0.143812	0.048	0.037	1	1.22789	0.048	0.071	1	1.3717	0.071	0.037	1	0.378968
Btg1													-0.176786	0.012	0.008	1	1.48215	0.012	0.021	1	1.30537	0.021	0.008	1	-0.0752089	0.083	0.08	1	0.290295	0.083	0.062	1	0.215086	0.062	0.08	1	0.194119	0.125	0.085	1	-0.184985	0.125	0.07	1	0.00913419	0.07	0.085	1	-0.774609
Btg1-ps1
Btg1-ps2
Btg2	0.893343	0.094	0.05	8.65e-27	0.492096	0.094	0.13	1.35e-139	1.38544	0.13	0.05	0	-0.0558014	0.029	0.026	1	4.1488	0.029	0.277	3.28e-222	4.093	0.277	0.026	1.28e-249	-0.223841	0.142	0.142	1	2.70298	0.142	0.389	2.2e-276	2.47914	0.389	0.142	1.39e-268	-1.76919	0.036	0.075	1	0.348809	0.036	0.023	1	-1.42038	0.023	0.075	1	-0.896003
Btg3	-0.553502	0.012	0.023	1	0.915374	0.012	0.033	1.42e-21	0.361872	0.033	0.023	2.25e-08	-0.370557	0.067	0.069	1	0.3431	0.067	0.071	1	-0.0274578	0.071	0.069	1	-0.152501	0.116	0.108	1	0.248439	0.116	0.094	1	0.0959378	0.094	0.108	1	-0.69864	0.048	0.078	1	0.863529	0.048	0.071	1	0.164889	0.071	0.078	1	0.0481516
Btg4													0.438939	0.019	0.012	1	-0.231839	0.019	0.013	1	0.2071	0.013	0.012	1													0.0515948	0.024	0.017	1	-0.892447	0.024	0.009	1	-0.840852	0.009	0.017	1
Btk
Btla
Btn1a1
Btn2a2
Btnl1
Btnl10
Btnl2
Btnl4
Btnl6
Btnl9																									-0.253145	0.38	0.371	1	0.301192	0.38	0.343	1	0.0480472	0.343	0.371	1	0.813468	0.015	0.007	1	0.759651	0.015	0.007	1					0.207352
Btrc	-0.21157	0.323	0.351	1.3e-08	0.162783	0.323	0.371	2.75e-05	-0.0487869	0.371	0.351	1	-0.0881013	0.392	0.354	1	0.00122491	0.392	0.348	1	-0.0868764	0.348	0.354	1	0.030886	0.297	0.252	1	0.163295	0.297	0.23	1.25e-06	0.194181	0.23	0.252	1	-0.198808	0.256	0.262	1	0.25412	0.256	0.214	1	0.0553118	0.214	0.262	1	0.190658
Bub1
Bub1b																																					1.46823	0.012	0.003	1	-2.01095	0.012	0.001	1
Bub3	0.0259784	0.041	0.037	1	-0.790839	0.041	0.025	1.32e-05	-0.76486	0.025	0.037	0.0220282	-0.0945816	0.058	0.049	1	-0.182743	0.058	0.042	1	-0.277325	0.042	0.049	1	0.129516	0.06	0.055	1	0.0807896	0.06	0.044	0.693595	0.210305	0.044	0.055	1	0.0923545	0.062	0.058	1	-0.771713	0.062	0.031	1	-0.679359	0.031	0.058	1	0.131854
Bud13	0.0118789	0.03	0.027	1	-0.25825	0.03	0.027	0.000736493	-0.246371	0.027	0.027	0.000103079	-0.282197	0.021	0.02	1	-0.38782	0.021	0.014	0.140254	-0.670017	0.014	0.02	0.692975	0.0710471	0.023	0.019	1	-0.320854	0.023	0.014	0.000159275	-0.249807	0.014	0.019	0.30903	-1.12906	0.018	0.034	1	0.927779	0.018	0.02	1	-0.201277	0.02	0.034	1	1.21477
Bud23	0.307605	0.04	0.027	1	-1.30646	0.04	0.017	1.15e-24	-0.998858	0.017	0.027	1.13e-07	0.336094	0.028	0.021	1	-1.08452	0.028	0.011	5.27e-08	-0.748426	0.011	0.021	0.0743018	0.0727116	0.033	0.024	1	-0.566244	0.033	0.015	8.12e-09	-0.493533	0.015	0.024	3.46e-05	-0.000630757	0.039	0.024	1	-0.376681	0.039	0.017	1	-0.377311	0.017	0.024	1	-0.0712691
Bud31	0.294702	0.023	0.013	1	-1.57855	0.023	0.008	0.00166518	-1.28384	0.008	0.013	1	0.175687	0.028	0.021	1	-0.0282023	0.028	0.024	1	0.147485	0.024	0.021	1	0.156282	0.034	0.027	1	0.37728	0.034	0.024	1	0.533562	0.024	0.027	1	-0.257945	0.027	0.034	1	0.502394	0.027	0.022	1	0.244449	0.022	0.034	1	-0.27013
Bves	-0.166365	0.319	0.336	0.000285856	0.0936783	0.319	0.357	0.0179938	-0.0726867	0.357	0.336	1
BX088531.1
BX571804.1
Bysl	0.409361	0.032	0.024	1	-0.689652	0.032	0.022	0.0688316	-0.280291	0.022	0.024	1	-0.00677606	0.019	0.015	1	-0.0550159	0.019	0.015	1	-0.0617919	0.015	0.015	1	-0.255516	0.017	0.018	1	0.180726	0.017	0.012	1	-0.0747905	0.012	0.018	1	0.290616	0.027	0.02	1	-1.00196	0.027	0.012	1	-0.711346	0.012	0.02	1	1.14159
Bzw1	0.532293	0.075	0.055	0.00202078	-0.802316	0.075	0.049	4.49e-11	-0.270023	0.049	0.055	1	0.0978239	0.1	0.076	1	0.00921624	0.1	0.085	1	0.10704	0.085	0.076	1	-0.19485	0.088	0.086	1	0.506945	0.088	0.08	1	0.312096	0.08	0.086	1	0.945618	0.125	0.065	1	-0.741332	0.125	0.066	1	0.204286	0.066	0.065	1	-0.197217
Bzw2	-0.244964	0.472	0.51	6.53e-22	0.25075	0.472	0.544	2.94e-25	0.00578657	0.544	0.51	1	2.85573	0.012	0.002	1	0.169148	0.012	0.008	1.1e-15					0.151684	0.081	0.063	1	-0.239885	0.081	0.05	8.76e-15	-0.0882005	0.05	0.063	3.8e-24	-0.0155815	0.149	0.133	1	-0.438834	0.149	0.074	1	-0.454416	0.074	0.133	1	-0.0755139
C1d	-0.0690603	0.049	0.045	1	-0.533787	0.049	0.034	1	-0.602847	0.034	0.045	1	-0.208348	0.038	0.03	1	0.327877	0.038	0.033	1	0.119529	0.033	0.03	1	0.0863348	0.033	0.025	1	-0.569186	0.033	0.013	1.73e-07	-0.482851	0.013	0.025	4.66e-05	-1.03972	0.03	0.048	1	0.678369	0.03	0.033	1	-0.361353	0.033	0.048	1	-0.611955
C1galt1	-0.178469	0.098	0.105	1	-0.341093	0.098	0.081	4.59e-12	-0.519562	0.081	0.105	5.04e-20	-0.224656	0.088	0.082	1	-0.11509	0.088	0.067	1.08e-05	-0.339746	0.067	0.082	0.0149041	0.0458998	0.122	0.105	1	-0.176474	0.122	0.07	2.22e-26	-0.130574	0.07	0.105	7.29e-13	-0.261281	0.146	0.139	1	-0.0951608	0.146	0.087	1	-0.356442	0.087	0.139	1	-0.276224
C1galt1c1	-0.064742	0.043	0.043	1	-0.603818	0.043	0.029	0.000269146	-0.66856	0.029	0.043	0.000107795	-0.105761	0.023	0.019	1	-0.00197585	0.023	0.02	1	-0.107736	0.02	0.019	1	-0.489388	0.016	0.021	1	0.509617	0.016	0.013	1	0.0202289	0.013	0.021	1	-1.02313	0.036	0.041	1	0.870016	0.036	0.033	1	-0.15311	0.033	0.041	1	1.80847
C1qa																																					-0.8901	0.012	0.01	1	-4.23115	0.012	0	1	-5.12125	0	0.01	1
C1qb																																																	-4.49816
C1qbp	0.576994	0.033	0.023	1	-3.04223	0.033	0.005	2.22e-12	-2.46524	0.005	0.023	5.78e-05	-0.511454	0.015	0.02	1	-0.890572	0.015	0.006	1	-1.40203	0.006	0.02	1	-0.663596	0.019	0.027	1	-0.0729448	0.019	0.011	1	-0.73654	0.011	0.027	0.000726342	-1.18481	0.024	0.041	1	-3.58555	0.024	0.001	1	-4.77035	0.001	0.041	0.283894	-0.851606
C1qc
C1ql1
C1ql2
C1ql3					1.84051	0.007	0.021	4.24e-19	1.64804	0.021	0.008	1.68e-15
C1ql4
C1qtnf1													-0.184978	0.128	0.121	1	-1.04794	0.128	0.056	3.18e-35	-1.23292	0.056	0.121	2.26e-30	-0.0459159	0.022	0.018	1	-1.02468	0.022	0.006	4.46e-16	-1.0706	0.006	0.018	3.65e-10	0.69331	0.045	0.034	1	-1.56681	0.045	0.015	1	-0.873503	0.015	0.034	1	-0.674856
C1qtnf12													0.838677	0.012	0.006	1	0.428012	0.012	0.013	1	1.26669	0.013	0.006	1													1.08114	0.015	0.003	1	-0.241262	0.015	0.01	1	0.839876	0.01	0.003	1
C1qtnf2													-0.610684	0.05	0.06	1	0.470371	0.05	0.052	1	-0.140313	0.052	0.06	1													0.558513	0.018	0.014	1	-0.731627	0.018	0.01	1	-0.173113	0.01	0.014	1
C1qtnf3
C1qtnf4
C1qtnf5
C1qtnf6													0.38858	0.049	0.036	1	-0.203336	0.049	0.036	1	0.185244	0.036	0.036	1	0.251901	0.018	0.012	1	-0.351908	0.018	0.009	0.0216696	-0.100007	0.009	0.012	1	-2.61396	0.009	0.031	1					-2.32302	0.004	0.031	1
C1qtnf7													0.0582664	0.758	0.679	0.388194	-0.154164	0.758	0.666	2.93e-09	-0.0958972	0.666	0.679	1													0.303391	0.077	0.061	1	-1.77011	0.077	0.02	0.155783	-1.46672	0.02	0.061	1	0.488873
C1qtnf9																									-0.150746	0.214	0.198	1	0.0741184	0.214	0.151	9.73e-09	-0.0766279	0.151	0.198	7.55e-05	1.20306	0.012	0.01	1	-3.16796	0.012	0.003	1	-1.9649	0.003	0.01	1	0.191205
C1ra													-0.650381	0.054	0.065	1	0.496225	0.054	0.06	1	-0.154155	0.06	0.065	1													-1.96408	0.009	0.024	1	2.00028	0.009	0.017	1	0.0362044	0.017	0.024	1
C1rb
C1rl													0.0893496	0.012	0.01	1	-0.389144	0.012	0.008	1	-0.299794	0.008	0.01	1													0.76502	0.015	0.007	1	-3.62395	0.015	0.001	1
C1s1													-0.104855	0.119	0.097	1	0.500495	0.119	0.132	1	0.395641	0.132	0.097	1
C1s2
C2
C2cd2	0.740582	0.142	0.082	1.19e-36	-0.739466	0.142	0.095	3.94e-39	0.0011163	0.095	0.082	1	-0.121298	0.106	0.093	1	0.283956	0.106	0.104	1	0.162658	0.104	0.093	1	-0.0889971	0.139	0.134	1	0.381179	0.139	0.133	1	0.292182	0.133	0.134	1	-0.918261	0.098	0.173	1	1.25693	0.098	0.18	1	0.338671	0.18	0.173	1	-0.162934
C2cd2l	0.875258	0.029	0.018	1	-1.55902	0.029	0.011	1.54e-09	-0.683765	0.011	0.018	0.146238	0.552963	0.01	0.006	1	-0.677282	0.01	0.004	0.461688					0.482071	0.06	0.037	1	-0.0591355	0.06	0.037	1.75e-06	0.422936	0.037	0.037	1	1.12784	0.036	0.02	1	-1.20387	0.036	0.013	1	-0.0760276	0.013	0.02	1	1.02054
C2cd3	0.335834	0.13	0.106	1	-0.351538	0.13	0.116	1.61e-05	-0.0157037	0.116	0.106	1	-0.153249	0.096	0.081	1	-0.266164	0.096	0.065	1.55e-06	-0.419413	0.065	0.081	0.00212018	0.401285	0.114	0.08	0.12661	-0.220672	0.114	0.067	3.4e-24	0.180613	0.067	0.08	0.00228801	-0.577007	0.116	0.122	1	0.188426	0.116	0.089	1	-0.388581	0.089	0.122	1	0.324858
C2cd4a
C2cd4b
C2cd4c
C2cd4d
C2cd5	-0.139619	0.367	0.372	0.288909	0.186711	0.367	0.426	1e-08	0.0470928	0.426	0.372	1	-0.139084	0.227	0.196	1	-0.0292785	0.227	0.189	9.46e-06	-0.168363	0.189	0.196	0.899172	0.55263	0.101	0.057	0.00796216	-0.0701252	0.101	0.068	3.32e-19	0.482505	0.068	0.057	1	0.604609	0.149	0.099	1	-0.253488	0.149	0.092	1	0.351121	0.092	0.099	1	1.10399
C2cd6
C3													-1.39784	0.087	0.16	2.1e-23	1.35185	0.087	0.162	1.54e-29	-0.0459924	0.162	0.16	1													-0.513514	0.009	0.01	1					-0.997673	0.006	0.01	1	0.486205
C3ar1
C4b													0.321652	0.014	0.009	1	0.30858	0.014	0.016	1	0.630232	0.016	0.009	1
C4bp
C5ar1
C5ar2																																					-1.36017	0.015	0.017	1	2.53875	0.015	0.031	1	1.17859	0.031	0.017	1
C6
C7													-0.348388	0.111	0.099	1	0.971101	0.111	0.113	1	0.622713	0.113	0.099	1
C77080													0.0520923	0.08	0.063	1	-1.1349	0.08	0.034	1.03e-22	-1.08281	0.034	0.063	1.68e-10	-0.0815619	0.026	0.022	1	-0.86093	0.026	0.011	1.92e-09	-0.942491	0.011	0.022	0.000328815	0.611969	0.027	0.014	1	-1.50207	0.027	0.006	1	-0.890103	0.006	0.014	1
C87414
C87436	0.347366	0.157	0.117	1.68e-09	-0.558462	0.157	0.123	1.04e-22	-0.211096	0.123	0.117	1	-0.182072	0.078	0.067	1	-0.798879	0.078	0.042	7.89e-19	-0.980952	0.042	0.067	1.07e-06	-0.0116629	0.041	0.031	1	-0.316737	0.041	0.025	1.14e-09	-0.3284	0.025	0.031	0.332769	-1.85103	0.051	0.092	1	1.41223	0.051	0.055	1	-0.438802	0.055	0.092	1	-0.337674
C87499
C87977
C8a
C8b
C8g
C9
C9orf72	-0.106087	0.06	0.054	1	0.597165	0.06	0.118	9.78e-42	0.491078	0.118	0.054	3.18e-59	0.329678	0.025	0.014	1	0.66469	0.025	0.037	1	0.994369	0.037	0.014	0.137946					1.40153	0.007	0.021	0.00592945	1.60772	0.021	0.005	8.21e-07	-0.369157	0.012	0.014	1	2.55436	0.012	0.068	1	2.1852	0.068	0.014	1	0.669725
CAAA01077340.1
CAAA01118383.1	-0.270184	0.102	0.112	1	0.0800809	0.102	0.106	1	-0.190103	0.106	0.112	0.844665	-0.152831	0.097	0.089	1	0.0039639	0.097	0.081	1	-0.148867	0.081	0.089	1	-0.0363059	0.089	0.08	1	0.296492	0.089	0.076	1	0.260186	0.076	0.08	1	0.0845389	0.113	0.122	1	-0.333644	0.113	0.077	1	-0.249105	0.077	0.122	1	-0.549318
CAAA01147332.1
CAAA01165726.1
Caap1	-0.0989733	0.192	0.195	1	0.0663715	0.192	0.199	1	-0.0326018	0.199	0.195	1	-0.0447614	0.137	0.114	1	0.0517734	0.137	0.109	0.0488344	0.00701196	0.109	0.114	1	0.345038	0.12	0.089	0.524878	-0.0488372	0.12	0.073	2.41e-17	0.296201	0.073	0.089	0.494276	0.00527847	0.143	0.156	1	0.0978064	0.143	0.118	1	0.103085	0.118	0.156	1	-0.491327
Cab39	0.223526	0.325	0.294	1	-0.156162	0.325	0.316	1	0.0673642	0.316	0.294	1	0.207789	0.193	0.141	0.00330594	-0.143857	0.193	0.147	1.93e-11	0.0639315	0.147	0.141	1	0.0447603	0.219	0.185	1	0.127425	0.219	0.165	2.6e-09	0.172185	0.165	0.185	0.175214	0.376587	0.217	0.18	1	-0.140352	0.217	0.153	1	0.236236	0.153	0.18	1	-0.661982
Cab39l	-0.20665	0.171	0.185	0.000643006	0.248391	0.171	0.207	0.00225818	0.0417403	0.207	0.185	1	0.0436016	0.229	0.179	1	-0.12836	0.229	0.177	5.22e-06	-0.0847587	0.177	0.179	1	-0.0503796	0.15	0.124	1	0.30224	0.15	0.123	1	0.251861	0.123	0.124	1	-0.12801	0.202	0.177	1	0.185684	0.202	0.185	1	0.0576744	0.185	0.177	1	0.347367
Cabcoco1	-0.341686	0.358	0.389	8.94e-14	-0.185519	0.358	0.336	1.14e-05	-0.527204	0.336	0.389	9.55e-51																									4.92696	0.018	0	1	-4.61375	0.018	0.001	1
Cabin1	-0.141975	0.353	0.357	1	-0.554798	0.353	0.282	7.67e-62	-0.696773	0.282	0.357	1.28e-81	-0.131777	0.17	0.143	1	-0.386227	0.17	0.114	3.08e-25	-0.518005	0.114	0.143	3.29e-10	0.241621	0.164	0.12	0.529448	-0.169048	0.164	0.102	1.14e-28	0.0725728	0.102	0.12	1.89e-07	-0.560273	0.131	0.194	1	-0.149578	0.131	0.09	1	-0.709851	0.09	0.194	0.00322227	0.152169
Cables1	-0.478547	0.035	0.054	1	-0.679539	0.035	0.024	5.48e-19	-1.15809	0.024	0.054	8.47e-32	0.289609	0.262	0.184	1.26e-09	-0.273757	0.262	0.192	1.63e-12	0.0158525	0.192	0.184	1	0.487953	0.082	0.05	2.08e-05	-0.489123	0.082	0.04	1.13e-27	-0.00117003	0.04	0.05	1	0.134402	0.116	0.095	1	-0.732467	0.116	0.055	1	-0.598064	0.055	0.095	1	0.704534
Cables2	0.225052	0.028	0.025	1	-1.08636	0.028	0.019	0.0034097	-0.861308	0.019	0.025	6.91e-06	0.0633021	0.02	0.015	1	-0.387914	0.02	0.012	1	-0.324612	0.012	0.015	1	0.301659	0.092	0.066	0.0127185	-0.361928	0.092	0.047	1.85e-29	-0.0602691	0.047	0.066	0.000764494	0.182511	0.027	0.02	1	-0.412713	0.027	0.015	1	-0.230202	0.015	0.02	1	0.416742
Cabp1													0.128947	0.045	0.03	1	-0.838716	0.045	0.021	2.93e-08	-0.70977	0.021	0.03	0.247584	-0.639028	0.108	0.14	0.0192919	-0.174835	0.108	0.076	3.78e-07	-0.813864	0.076	0.14	4.86e-34	-0.217035	0.03	0.02	1	-1.2346	0.03	0.009	1	-1.45163	0.009	0.02	1	-0.774558
Cabp2
Cabp4					1.51233	0.004	0.013	1.18e-10	2.30331	0.013	0.002	9.79e-16
Cabp5
Cabp7
Cabs1
Cabyr	-0.407239	0.02	0.025	1	1.73553	0.02	0.064	7.2e-61	1.32829	0.064	0.025	2.08e-46					1.94632	0.005	0.019	0.00263073	0.807924	0.019	0.009	1
Cacfd1	-0.00487655	0.037	0.039	1	-0.301092	0.037	0.031	1	-0.305968	0.031	0.039	0.000435655	0.260788	0.049	0.036	1	-0.0792989	0.049	0.04	1	0.181489	0.04	0.036	1	-0.066029	0.012	0.013	1	0.0295995	0.012	0.01	1	-0.0364295	0.01	0.013	1	-0.486699	0.018	0.034	1	0.3905	0.018	0.019	1	-0.0961985	0.019	0.034	1	-0.598129
Cachd1	0.109523	0.02	0.023	1	0.934939	0.02	0.046	1.88e-05	1.04446	0.046	0.023	8.37e-09	-0.067657	0.194	0.165	1	0.268425	0.194	0.191	1	0.200768	0.191	0.165	1	-0.0813756	0.111	0.101	1	0.0141726	0.111	0.076	1.93e-07	-0.067203	0.076	0.101	0.108069	0.0206592	0.208	0.194	1	-0.068802	0.208	0.144	1	-0.0481428	0.144	0.194	1	-0.482505
Cacna1a	0.417664	0.081	0.067	1	-0.479338	0.081	0.077	4e-08	-0.0616745	0.077	0.067	0.0200744	-0.16782	0.195	0.192	1	-0.17508	0.195	0.161	0.00547304	-0.3429	0.161	0.192	0.000201317													1.84159	0.042	0.007	1	-0.571791	0.042	0.017	1	1.2698	0.017	0.007	1	0.828213
Cacna1b
Cacna1c	-0.226954	0.983	0.985	2.6e-161	0.129101	0.983	0.988	7.91e-59	-0.0978526	0.988	0.985	1.83e-40
Cacna1d	-0.271113	0.03	0.035	1	-0.14573	0.03	0.033	1	-0.416842	0.033	0.035	1	-0.161043	0.2	0.177	1	0.165395	0.2	0.185	1	0.00435219	0.185	0.177	1
Cacna1e																																					0.390089	0.095	0.085	1	-0.473362	0.095	0.06	1	-0.0832738	0.06	0.085	1	5.00335
Cacna1f
Cacna1g	-0.375247	0.089	0.107	0.000108443	-0.00790901	0.089	0.089	1	-0.383156	0.089	0.107	4.58e-10
Cacna1h	-0.352403	0.032	0.038	1	-0.659014	0.032	0.018	1.29e-13	-1.01142	0.018	0.038	2.53e-25
Cacna1i
Cacna1s	-0.586812	0.024	0.032	1.67e-05	0.458083	0.024	0.028	1	-0.128729	0.028	0.032	1
Cacna2d1	-0.00513149	0.872	0.873	1	0.247067	0.872	0.927	1.48e-67	0.241936	0.927	0.873	3.09e-65	0.0492129	0.367	0.285	1.06e-06	0.581801	0.367	0.434	1	0.631014	0.434	0.285	1.09e-15													0.763001	0.065	0.014	1	0.113691	0.065	0.039	1.1e-05	0.876692	0.039	0.014	1	4.24974
Cacna2d2	-0.607328	0.009	0.012	1	0.742145	0.009	0.015	1	0.134817	0.015	0.012	1
Cacna2d3	-0.170306	0.073	0.073	1	1.87612	0.073	0.207	2.55e-203	1.70582	0.207	0.073	1.07e-193																									-0.372094	0.009	0.01	1	1.94898	0.009	0.019	1	1.57688	0.019	0.01	1	4.45395
Cacna2d4
Cacnb1	0.443926	0.032	0.026	1	-0.733136	0.032	0.024	2.39e-06	-0.28921	0.024	0.026	0.019776	0.203967	0.022	0.016	1	-0.96639	0.022	0.009	1.36e-05	-0.762423	0.009	0.016	0.267681																	2.25734	0.006	0.019	1	2.20736	0.019	0.007	1
Cacnb2	0.0064444	0.934	0.94	1	0.381574	0.934	0.972	3.76e-235	0.388018	0.972	0.94	7.57e-260
Cacnb3													0.455043	0.023	0.015	1	-0.411456	0.023	0.012	0.400953	0.0435862	0.012	0.015	1	0.781707	0.01	0.006	1	-0.721385	0.01	0.004	0.172939
Cacnb4	-0.627443	0.008	0.011	1	0.638145	0.008	0.014	1	0.0107017	0.014	0.011	1	0.00968657	0.068	0.055	1	0.124126	0.068	0.057	1	0.133812	0.057	0.055	1													-0.850535	0.241	0.286	1	0.350467	0.241	0.213	1	-0.500068	0.213	0.286	1
Cacng1
Cacng2
[truncated: 17,932 more rows]
[truncated: 107 more columns]
