# Supplementary material for: Cardiorenal heart failure with preserved ejection fraction is caused by a reversible rise of mineralocorticoid-induced fibroblast subtypes
Source: Research Square preprint supplement (doi:10.21203/rs.3.rs-7039115/v1), 2025-07-14
Supplement: Supplementary file 7 [file 4cca08fb44197b73e8535f2c.xlsx]

## Sheet: CM_ALDO_up
Term	Overlap	P-value	Adjusted P-value	Old P-value	Old Adjusted P-value	Odds Ratio	Combined Score	Genes
Positive Regulation Of Signal Transduction (GO:0009967)	8/266	1.90904e-05	0.0133741	0	0	7.81395	84.909	AXL;TSPAN5;PRKCA;ITGA5;SULF1;FGFR2;LIMS2;ROBO1
Nucleotide-Sugar Biosynthetic Process (GO:0009226)	3/15	3.36455e-05	0.0133741	0	0	59.9458	617.419	UGDH;GFPT2;UAP1
Regulation Of Cellular Response To Growth Factor Stimulus (GO:0090287)	3/19	7.07683e-05	0.014578	0	0	44.9503	429.55	PCSK6;SULF1;FSTL1
Negative Regulation Of Cell Migration (GO:0030336)	6/163	7.33486e-05	0.014578	0	0	9.43806	89.853	SERPINE1;PTPRJ;MITF;SULF1;CLASP1;ROBO1
Heart Development (GO:0007507)	6/171	9.55614e-05	0.0151943	0	0	8.97682	83.0871	AKAP13;FLRT2;MICAL2;UTY;PDLIM5;FBN1
Outflow Tract Septum Morphogenesis (GO:0003148)	3/24	0.000145539	0.0192839	0	0	34.2392	302.506	SEMA3C;FGFR2;ROBO1
Circulatory System Development (GO:0072359)	5/132	0.000263459	0.0271128	0	0	9.61748	79.2635	AKAP13;MICAL2;UTY;PDLIM5;FBN1
Negative Regulation Of Cell Motility (GO:2000146)	5/133	0.000272833	0.0271128	0	0	9.54186	78.3067	SERPINE1;PTPRJ;MITF;SULF1;ROBO1
Skeletal System Development (GO:0001501)	5/149	0.000460096	0.0363662	0	0	8.47479	65.121	AKAP13;ZBTB16;SULF1;FGFR2;FBN1
UDP-N-acetylglucosamine Biosynthetic Process (GO:0006048)	2/8	0.00050318	0.0363662	0	0	79	599.97	GFPT2;UAP1
Protein Hexamerization (GO:0034214)	2/8	0.00050318	0.0363662	0	0	79	599.97	UGDH;MAT2A
Amino Sugar Biosynthetic Process (GO:0046349)	2/9	0.000645139	0.0394527	0	0	67.7109	497.407	GFPT2;UAP1
Embryonic Eye Morphogenesis (GO:0048048)	2/9	0.000645139	0.0394527	0	0	67.7109	497.407	MFAP5;FBN1
UDP-N-acetylglucosamine Metabolic Process (GO:0006047)	2/10	0.000804172	0.0456655	0	0	59.244	422.155	GFPT2;UAP1
Embryonic Organ Morphogenesis (GO:0048562)	3/44	0.000895063	0.0474383	0	0	17.5195	122.963	MFAP5;FGFR2;FBN1
Microtubule Bundle Formation (GO:0001578)	3/51	0.00137725	0.0661111	0	0	14.9593	98.5471	CLIP1;NCKAP5;CLASP1
Transmembrane Receptor Protein Tyrosine Kinase Signaling Pathway (GO:0007169)	6/284	0.0014137	0.0661111	0	0	5.29748	34.7597	FLRT2;AXL;ARHGEF28;PTPRJ;SULF1;FGFR2
Regulation Of Extracellular Matrix Disassembly (GO:0010715)	2/14	0.00160814	0.0672878	0	0	39.4881	254.014	DPP4;CLASP1
Establishment Of Spindle Localization (GO:0051293)	2/14	0.00160814	0.0672878	0	0	39.4881	254.014	MAP4;CLASP1
Positive Regulation Of Angiogenesis (GO:0045766)	4/119	0.00173763	0.0690709	0	0	8.3983	53.3732	ANXA3;SERPINE1;PRKCA;ITGA5
Positive Regulation Of MAPK Cascade (GO:0043410)	6/310	0.00219883	0.0832416	0	0	4.83799	29.6077	ACKR3;PTPRJ;PRKCA;PDE8A;FGFR2;ROBO1
Regulation Of Cell Migration (GO:0030334)	7/434	0.00265985	0.0961172	0	0	4.04379	23.9776	SEMA3C;SERPINE1;PTPRJ;PRKCA;MITF;SULF1;ROBO1
Eye Morphogenesis (GO:0048592)	2/19	0.00298	0.103004	0	0	27.8669	162.069	MFAP5;FBN1
Negative Regulation Of Epithelial Cell Proliferation (GO:0050680)	3/70	0.003414	0.113089	0	0	10.7069	60.8137	SULF1;FGFR2;ROBO1
Regulation Of Lipopolysaccharide-Mediated Signaling Pathway (GO:0031664)	2/21	0.0036393	0.11573	0	0	24.9311	140.012	PRKCA;CD55
Regulation Of Rho Protein Signal Transduction (GO:0035023)	3/73	0.00384333	0.117517	0	0	10.2465	56.9849	AKAP13;ARHGEF28;ROBO1
Regulation Of BMP Signaling Pathway (GO:0030510)	3/75	0.00414701	0.122107	0	0	9.96084	54.6389	PCSK6;SULF1;FSTL1
Negative Regulation Of Extrinsic Apoptotic Signaling Pathway Via Death Domain Receptors (GO:1902042)	2/23	0.00436013	0.123796	0	0	22.5544	122.589	SERPINE1;BCL2L1
Cardiac Muscle Cell Development (GO:0055013)	2/26	0.00555436	0.144437	0	0	19.7321	102.472	PDLIM5;SLC8A1
Positive Regulation Of Microtubule Polymerization Or Depolymerization (GO:0031112)	2/26	0.00555436	0.144437	0	0	19.7321	102.472	CLIP1;CLASP1
Cardiac Muscle Cell Differentiation (GO:0055007)	2/27	0.00598204	0.144437	0	0	18.9419	96.9635	AKAP13;SLC8A1
Microtubule Polymerization Or Depolymerization (GO:0031109)	2/27	0.00598204	0.144437	0	0	18.9419	96.9635	MAP4;NCKAP5
Negative Regulation Of Wound Healing (GO:0061045)	2/28	0.0064243	0.144437	0	0	18.2125	91.9304	SERPINE1;CLASP1
Protein Depolymerization (GO:0051261)	2/28	0.0064243	0.144437	0	0	18.2125	91.9304	MICAL2;NCKAP5
Positive Regulation Of Cell Adhesion (GO:0045785)	3/88	0.00647529	0.144437	0	0	8.43189	42.4947	PTPRJ;PRKCA;FBLN2
Positive Regulation Of Microtubule Polymerization (GO:0031116)	2/29	0.00688102	0.144437	0	0	17.537	87.3167	CLIP1;CLASP1
Positive Regulation Of ERK1 And ERK2 Cascade (GO:0070374)	4/179	0.00745278	0.144437	0	0	5.50216	26.956	ACKR3;PRKCA;PDE8A;FGFR2
Regulation Of Extrinsic Apoptotic Signaling Pathway Via Death Domain Receptors (GO:1902041)	2/31	0.00783728	0.144437	0	0	16.3259	79.1623	SERPINE1;BCL2L1
Regulation Of Transmembrane Receptor Protein Serine/Threonine Kinase Signaling Pathway (GO:0090092)	2/31	0.00783728	0.144437	0	0	16.3259	79.1623	PCSK6;FSTL1
Positive Regulation Of Rho Protein Signal Transduction (GO:0035025)	2/31	0.00783728	0.144437	0	0	16.3259	79.1623	AKAP13;ROBO1
Endodermal Cell Differentiation (GO:0035987)	2/31	0.00783728	0.144437	0	0	16.3259	79.1623	COL8A1;ITGA5
Negative Chemotaxis (GO:0050919)	2/31	0.00783728	0.144437	0	0	16.3259	79.1623	SEMA3C;ROBO1
Negative Regulation Of Chemotaxis (GO:0050922)	2/31	0.00783728	0.144437	0	0	16.3259	79.1623	SEMA3C;ROBO1
Positive Regulation Of Epithelial Cell Migration (GO:0010634)	3/95	0.00799397	0.144437	0	0	7.78759	37.6068	ANXA3;PRKCA;CLASP1
Positive Regulation Of Notch Signaling Pathway (GO:0045747)	2/33	0.00884981	0.152948	0	0	15.2711	72.1921	TSPAN5;ROBO1
Regulation Of Cell Adhesion Mediated By Integrin (GO:0033628)	2/33	0.00884981	0.152948	0	0	15.2711	72.1921	DPP4;SERPINE1
Microtubule Polymerization (GO:0046785)	2/34	0.00937685	0.156503	0	0	14.7932	69.0768	MAP4;CLASP1
Hemopoiesis (GO:0030097)	3/101	0.00944924	0.156503	0	0	7.30858	34.0713	MFAP5;ZBTB16;FGFR2
Endoderm Formation (GO:0001706)	2/35	0.00991758	0.15769	0	0	14.3442	66.176	COL8A1;ITGA5
Establishment Of Spindle Orientation (GO:0051294)	2/35	0.00991758	0.15769	0	0	14.3442	66.176	MAP4;CLASP1
Positive Regulation Of Vasculature Development (GO:1904018)	3/104	0.0102311	0.159484	0	0	7.09042	32.4906	ANXA3;SERPINE1;PRKCA
Nervous System Development (GO:0007399)	6/433	0.010918	0.16692	0	0	3.42278	15.4618	SDK1;AXL;ZBTB16;MSI2;SPTBN1;ROBO1
Connective Tissue Development (GO:0061448)	2/38	0.0116206	0.17431	0	0	13.1468	58.5687	ZBTB16;SULF1
Regulation Of Angiogenesis (GO:0045765)	4/205	0.0118423	0.174345	0	0	4.78413	21.2228	ANXA3;SERPINE1;PRKCA;SULF1
Fibroblast Growth Factor Receptor Signaling Pathway (GO:0008543)	2/39	0.0122149	0.176561	0	0	12.7909	56.345	FLRT2;FGFR2
Regulation Of Microtubule Polymerization (GO:0031113)	2/40	0.0128222	0.178836	0	0	12.4536	54.2552	CLIP1;CLASP1
Endothelial Cell Migration (GO:0043542)	2/40	0.0128222	0.178836	0	0	12.4536	54.2552	DPP4;FSTL1
Positive Regulation Of Ossification (GO:0045778)	2/41	0.0134425	0.184254	0	0	12.1337	52.2882	ZBTB16;SLC8A1
Protein Maturation (GO:0051604)	3/117	0.0140451	0.189252	0	0	6.27774	26.7776	TSPAN5;TLL2;PCSK6
Bone Development (GO:0060348)	2/44	0.0153797	0.197702	0	0	11.2653	47.0293	SULF1;FGFR2
Receptor-Mediated Endocytosis (GO:0006898)	3/122	0.0156993	0.197702	0	0	6.01245	24.9766	DPP4;ACKR3;DNM1
Epithelial Cell Migration (GO:0010631)	2/46	0.0167338	0.197702	0	0	10.7522	43.9798	DPP4;FSTL1
Regulation Of Anatomical Structure Morphogenesis (GO:0022603)	3/127	0.0174588	0.197702	0	0	5.76856	23.3506	PDLIM5;CLASP1;FGFR2
Cytoplasmic Microtubule Organization (GO:0031122)	2/48	0.0181369	0.197702	0	0	10.2836	41.2354	CLIP1;CLASP1
Positive Regulation Of Ras Protein Signal Transduction (GO:0046579)	2/51	0.0203314	0.197702	0	0	9.65258	37.6025	AKAP13;ROBO1
Regulation Of ERK1 And ERK2 Cascade (GO:0070372)	4/244	0.0210727	0.197702	0	0	3.99878	15.4344	ACKR3;PRKCA;PDE8A;FGFR2
Cartilage Development (GO:0051216)	2/52	0.0210863	0.197702	0	0	9.45905	36.5037	ZBTB16;SULF1
Negative Regulation Of Morphogenesis Of An Epithelium (GO:1905331)	1/5	0.0213179	0.197702	0	0	58.5588	225.347	SULF1
Regulation Of Morphogenesis Of A Branching Structure (GO:0060688)	1/5	0.0213179	0.197702	0	0	58.5588	225.347	FGFR2
Regulation Of Non-Motile Cilium Assembly (GO:1902855)	1/5	0.0213179	0.197702	0	0	58.5588	225.347	MAP4
Regulation Of Tooth Mineralization (GO:0070170)	1/5	0.0213179	0.197702	0	0	58.5588	225.347	ASPN
Chondrocyte Development (GO:0002063)	1/5	0.0213179	0.197702	0	0	58.5588	225.347	SULF1
Cilium Disassembly (GO:0061523)	1/5	0.0213179	0.197702	0	0	58.5588	225.347	MAP4
Contact Inhibition (GO:0060242)	1/5	0.0213179	0.197702	0	0	58.5588	225.347	PTPRJ
Epithelial Tube Branching Involved In Lung Morphogenesis (GO:0060441)	1/5	0.0213179	0.197702	0	0	58.5588	225.347	FGFR2
Epithelial Tube Formation (GO:0072175)	1/5	0.0213179	0.197702	0	0	58.5588	225.347	FGFR2
Gastrulation With Mouth Forming Second (GO:0001702)	1/5	0.0213179	0.197702	0	0	58.5588	225.347	UGDH
Negative Regulation Of Chemokine-Mediated Signaling Pathway (GO:0070100)	1/5	0.0213179	0.197702	0	0	58.5588	225.347	ROBO1
Regulation Of Macromolecule Biosynthetic Process (GO:0010556)	2/53	0.0218529	0.197702	0	0	9.27311	35.455	MITF;MSI2
Glycoprotein Metabolic Process (GO:0009100)	2/53	0.0218529	0.197702	0	0	9.27311	35.455	PCSK6;LARGE1
Regulation Of Focal Adhesion Assembly (GO:0051893)	2/54	0.0226308	0.197702	0	0	9.09432	34.4533	PTPRJ;CLASP1
Mesenchymal Cell Differentiation (GO:0048762)	2/54	0.0226308	0.197702	0	0	9.09432	34.4533	SEMA3C;FGFR2
Cellular Response To Fibroblast Growth Factor Stimulus (GO:0044344)	2/55	0.0234202	0.197702	0	0	8.92228	33.4957	FLRT2;FGFR2
Regulation Of Glial Cell Apoptotic Process (GO:0034350)	1/6	0.0255272	0.197702	0	0	46.8447	171.827	PRKCA
Negative Regulation Of Plasminogen Activation (GO:0010757)	1/6	0.0255272	0.197702	0	0	46.8447	171.827	SERPINE1
Regulation Of Smooth Muscle Cell Differentiation (GO:0051150)	1/6	0.0255272	0.197702	0	0	46.8447	171.827	FGFR2
Cellular Response To Caffeine (GO:0071313)	1/6	0.0255272	0.197702	0	0	46.8447	171.827	SLC8A1
Response To Caffeine (GO:0031000)	1/6	0.0255272	0.197702	0	0	46.8447	171.827	SLC8A1
Definitive Hemopoiesis (GO:0060216)	1/6	0.0255272	0.197702	0	0	46.8447	171.827	MFAP5
Desmosome Organization (GO:0002934)	1/6	0.0255272	0.197702	0	0	46.8447	171.827	PRKCA
Exocrine System Development (GO:0035272)	1/6	0.0255272	0.197702	0	0	46.8447	171.827	FGFR2
Positive Regulation Of Lipopolysaccharide-Mediated Signaling Pathway (GO:0031666)	1/6	0.0255272	0.197702	0	0	46.8447	171.827	PRKCA
Forebrain Neuron Development (GO:0021884)	1/6	0.0255272	0.197702	0	0	46.8447	171.827	FGFR2
Gland Morphogenesis (GO:0022612)	1/6	0.0255272	0.197702	0	0	46.8447	171.827	FGFR2
Vascular Associated Smooth Muscle Contraction (GO:0014829)	1/6	0.0255272	0.197702	0	0	46.8447	171.827	SLC8A1
Positive Regulation Of Pinocytosis (GO:0048549)	1/6	0.0255272	0.197702	0	0	46.8447	171.827	AXL
Maintenance Of Protein Location In Extracellular Region (GO:0071694)	1/6	0.0255272	0.197702	0	0	46.8447	171.827	FBN1
Membrane Biogenesis (GO:0044091)	1/6	0.0255272	0.197702	0	0	46.8447	171.827	SPTBN1
Mitotic Nuclear Membrane Disassembly (GO:0007077)	1/6	0.0255272	0.197702	0	0	46.8447	171.827	PRKCA
Receptor-Mediated Virion Attachment To Host Cell (GO:0046813)	1/6	0.0255272	0.197702	0	0	46.8447	171.827	DPP4
Protein Glycosylation (GO:0006486)	3/147	0.0255589	0.197702	0	0	4.96235	18.1958	GALNT16;GFPT2;LARGE1
Chordate Embryonic Development (GO:0043009)	2/59	0.0266887	0.197702	0	0	8.29449	30.0552	SULF1;FGFR2
Microtubule Cytoskeleton Organization Involved In Mitosis (GO:1902850)	2/59	0.0266887	0.197702	0	0	8.29449	30.0552	MAP4;CLASP1
Homophilic Cell Adhesion Via Plasma Membrane Adhesion Molecules (GO:0007156)	2/60	0.0275331	0.197702	0	0	8.15107	29.2816	SDK1;ROBO1
Regulation Of Chemokine-Mediated Signaling Pathway (GO:0070099)	1/7	0.0297187	0.197702	0	0	39.0353	137.247	ROBO1
Negative Regulation Of Glial Cell Apoptotic Process (GO:0034351)	1/7	0.0297187	0.197702	0	0	39.0353	137.247	PRKCA
Negative Regulation Of Keratinocyte Proliferation (GO:0010839)	1/7	0.0297187	0.197702	0	0	39.0353	137.247	FGFR2
Regulation Of Lipase Activity (GO:0060191)	1/7	0.0297187	0.197702	0	0	39.0353	137.247	PCSK6
Regulation Of Mammary Gland Epithelial Cell Proliferation (GO:0033599)	1/7	0.0297187	0.197702	0	0	39.0353	137.247	ROBO1
Phosphatidylserine Acyl-Chain Remodeling (GO:0036150)	1/7	0.0297187	0.197702	0	0	39.0353	137.247	PLA1A
Regulation Of Vascular Wound Healing (GO:0061043)	1/7	0.0297187	0.197702	0	0	39.0353	137.247	SERPINE1
Positive Regulation Of Extracellular Matrix Disassembly (GO:0090091)	1/7	0.0297187	0.197702	0	0	39.0353	137.247	CLASP1
Histone Lysine Demethylation (GO:0070076)	1/7	0.0297187	0.197702	0	0	39.0353	137.247	UTY
Positive Regulation Of Vascular Endothelial Growth Factor Signaling Pathway (GO:1900748)	1/7	0.0297187	0.197702	0	0	39.0353	137.247	ROBO1
Regulation Of CD4-positive, Alpha-Beta T Cell Activation (GO:2000514)	1/7	0.0297187	0.197702	0	0	39.0353	137.247	CD55
Negative Regulation Of T Cell Apoptotic Process (GO:0070233)	1/7	0.0297187	0.197702	0	0	39.0353	137.247	TSC22D3
Positive Regulation Of Cell Cycle (GO:0045787)	2/65	0.0319135	0.197702	0	0	7.50227	25.8433	PRKCA;FGFR2
Peptidyl-Threonine Modification (GO:0018210)	2/66	0.0328205	0.197702	0	0	7.38467	25.2312	GALNT16;PRKCA
CD40 Signaling Pathway (GO:0023035)	1/8	0.0338924	0.197702	0	0	33.4571	113.238	ITGA5
Astral Microtubule Organization (GO:0030953)	1/8	0.0338924	0.197702	0	0	33.4571	113.238	CLASP1
Nuclear Membrane Disassembly (GO:0051081)	1/8	0.0338924	0.197702	0	0	33.4571	113.238	PRKCA
Regulation Of Pinocytosis (GO:0048548)	1/8	0.0338924	0.197702	0	0	33.4571	113.238	AXL
Regulation Of DNA-templated Transcription Initiation (GO:2000142)	1/8	0.0338924	0.197702	0	0	33.4571	113.238	MITF
Regulation Of RNA Biosynthetic Process (GO:2001141)	1/8	0.0338924	0.197702	0	0	33.4571	113.238	MITF
Peptidyl-Serine Modification (GO:0018209)	3/166	0.0348283	0.197702	0	0	4.3797	14.7041	GALNT16;MAST2;PRKCA
Phagocytosis (GO:0006909)	2/69	0.0356015	0.197702	0	0	7.05295	23.5242	ANXA3;AXL
Negative Regulation Of Extrinsic Apoptotic Signaling Pathway (GO:2001237)	2/70	0.0365482	0.197702	0	0	6.94888	22.9947	SERPINE1;BCL2L1
Sulfur Compound Biosynthetic Process (GO:0044272)	2/70	0.0365482	0.197702	0	0	6.94888	22.9947	UGDH;MAT2A
Positive Regulation Of Protein Polymerization (GO:0032273)	2/70	0.0365482	0.197702	0	0	6.94888	22.9947	CLIP1;CLASP1
Regulation Of Cellular Biosynthetic Process (GO:0031326)	2/70	0.0365482	0.197702	0	0	6.94888	22.9947	MITF;MSI2
Cell-Cell Junction Assembly (GO:0007043)	2/71	0.0375046	0.197702	0	0	6.84783	22.4834	CTNNA1;PRKCA
Positive Regulation Of Cell-Substrate Adhesion (GO:0010811)	2/71	0.0375046	0.197702	0	0	6.84783	22.4834	FBLN2;LIMS2
Kidney Development (GO:0001822)	2/71	0.0375046	0.197702	0	0	6.84783	22.4834	ZBTB16;SULF1
Negative Regulation Of Extracellular Matrix Organization (GO:1903054)	1/9	0.0380483	0.197702	0	0	29.2735	95.6922	DPP4
Regulation Of Complement Activation (GO:0030449)	1/9	0.0380483	0.197702	0	0	29.2735	95.6922	CD55
Amino Sugar Metabolic Process (GO:0006040)	1/9	0.0380483	0.197702	0	0	29.2735	95.6922	GFPT2
Calcium Ion Transport Into Cytosol (GO:0060402)	1/9	0.0380483	0.197702	0	0	29.2735	95.6922	SLC8A1
Cellular Response To Purine-Containing Compound (GO:0071415)	1/9	0.0380483	0.197702	0	0	29.2735	95.6922	SLC8A1
Sequestering Of Extracellular Ligand From Receptor (GO:0035581)	1/9	0.0380483	0.197702	0	0	29.2735	95.6922	FBN1
Skeletal Muscle Tissue Regeneration (GO:0043403)	1/9	0.0380483	0.197702	0	0	29.2735	95.6922	LARGE1
Positive Regulation Of Lipase Activity (GO:0060193)	1/9	0.0380483	0.197702	0	0	29.2735	95.6922	FGFR2
Positive Regulation Of mRNA 3'-End Processing (GO:0031442)	1/9	0.0380483	0.197702	0	0	29.2735	95.6922	CPEB1
Fructose 6-Phosphate Metabolic Process (GO:0006002)	1/9	0.0380483	0.197702	0	0	29.2735	95.6922	GFPT2
Positive Regulation Of Mesenchymal Cell Proliferation (GO:0002053)	1/9	0.0380483	0.197702	0	0	29.2735	95.6922	FGFR2
Vasoconstriction (GO:0042310)	1/9	0.0380483	0.197702	0	0	29.2735	95.6922	SLC8A1
Wound Healing, Spreading Of Epidermal Cells (GO:0035313)	1/9	0.0380483	0.197702	0	0	29.2735	95.6922	ITGA5
Positive Regulation Of Vascular Endothelial Growth Factor Receptor Signaling Pathway (GO:0030949)	1/9	0.0380483	0.197702	0	0	29.2735	95.6922	ITGA5
Protein O-linked Glycosylation Via Serine (GO:0018242)	1/9	0.0380483	0.197702	0	0	29.2735	95.6922	GALNT16
Protein O-linked Glycosylation Via Threonine (GO:0018243)	1/9	0.0380483	0.197702	0	0	29.2735	95.6922	GALNT16
Microtubule Anchoring (GO:0034453)	1/9	0.0380483	0.197702	0	0	29.2735	95.6922	CLASP1
Regulation Of CD4-positive, Alpha-Beta T Cell Proliferation (GO:2000561)	1/9	0.0380483	0.197702	0	0	29.2735	95.6922	CD55
Negative Regulation Of Cell Adhesion Mediated By Integrin (GO:0033629)	1/9	0.0380483	0.197702	0	0	29.2735	95.6922	SERPINE1
Regulation Of Cell-Cell Adhesion Mediated By Integrin (GO:0033632)	1/9	0.0380483	0.197702	0	0	29.2735	95.6922	DPP4
Extracellular Matrix Organization (GO:0030198)	3/176	0.0403156	0.198968	0	0	4.12445	13.2437	FLRT2;COL8A1;TLL2
Positive Regulation Of Neurogenesis (GO:0050769)	2/75	0.0414248	0.198968	0	0	6.4713	20.6038	VCAN;ROBO1
Negative Regulation Of Hemostasis (GO:1900047)	1/10	0.0421865	0.198968	0	0	26.0196	82.3691	SERPINE1
Actin Filament Depolymerization (GO:0030042)	1/10	0.0421865	0.198968	0	0	26.0196	82.3691	MICAL2
Basement Membrane Organization (GO:0071711)	1/10	0.0421865	0.198968	0	0	26.0196	82.3691	FLRT2
Regulation Of Phospholipase Activity (GO:0010517)	1/10	0.0421865	0.198968	0	0	26.0196	82.3691	FGFR2
Positive Regulation Of Bone Resorption (GO:0045780)	1/10	0.0421865	0.198968	0	0	26.0196	82.3691	PRKCA
Positive Regulation Of Chondrocyte Differentiation (GO:0032332)	1/10	0.0421865	0.198968	0	0	26.0196	82.3691	ZBTB16
Positive Regulation Of Macrophage Differentiation (GO:0045651)	1/10	0.0421865	0.198968	0	0	26.0196	82.3691	PRKCA
Prostaglandin Transport (GO:0015732)	1/10	0.0421865	0.198968	0	0	26.0196	82.3691	SLCO3A1
Mesonephros Development (GO:0001823)	1/10	0.0421865	0.198968	0	0	26.0196	82.3691	ZBTB16
Receptor-Mediated Endocytosis Of Virus By Host Cell (GO:0019065)	1/10	0.0421865	0.198968	0	0	26.0196	82.3691	DPP4
Negative Regulation Of Transforming Growth Factor Beta Receptor Signaling Pathway (GO:0030512)	2/77	0.0434404	0.198968	0	0	6.2981	19.7531	ASPN;FBN1
Embryonic Organ Development (GO:0048568)	2/77	0.0434404	0.198968	0	0	6.2981	19.7531	TEAD1;FGFR2
Phosphate-Containing Compound Metabolic Process (GO:0006796)	3/184	0.0450022	0.198968	0	0	3.94056	12.2198	INPP4B;GFPT2;ACYP2
Response To Insulin (GO:0032868)	2/79	0.045492	0.198968	0	0	6.13389	18.9551	CPEB1;TBC1D4
Positive Regulation Of Endocytosis (GO:0045807)	2/79	0.045492	0.198968	0	0	6.13389	18.9551	AXL;SERPINE1
Negative Regulation Of Fibrinolysis (GO:0051918)	1/11	0.0463072	0.198968	0	0	23.4165	71.9461	SERPINE1
Regulation Of Homotypic Cell-Cell Adhesion (GO:0034110)	1/11	0.0463072	0.198968	0	0	23.4165	71.9461	PRKCA
Negative Regulation Of Platelet-Derived Growth Factor Receptor Signaling Pathway (GO:0010642)	1/11	0.0463072	0.198968	0	0	23.4165	71.9461	PTPRJ
Regulation Of Mesenchymal Cell Proliferation (GO:0010464)	1/11	0.0463072	0.198968	0	0	23.4165	71.9461	FGFR2
Negative Regulation Of Vascular Permeability (GO:0043116)	1/11	0.0463072	0.198968	0	0	23.4165	71.9461	PTPRJ
Regulation Of Muscle System Process (GO:0090257)	1/11	0.0463072	0.198968	0	0	23.4165	71.9461	PPP1R12B
Digestive System Development (GO:0055123)	1/11	0.0463072	0.198968	0	0	23.4165	71.9461	FGFR2
Positive Regulation Of Coagulation (GO:0050820)	1/11	0.0463072	0.198968	0	0	23.4165	71.9461	SERPINE1
Positive Regulation Of Hemostasis (GO:1900048)	1/11	0.0463072	0.198968	0	0	23.4165	71.9461	SERPINE1
Exit From Mitosis (GO:0010458)	1/11	0.0463072	0.198968	0	0	23.4165	71.9461	CLASP1
Melanocyte Differentiation (GO:0030318)	1/11	0.0463072	0.198968	0	0	23.4165	71.9461	MITF
Negative Regulation Of Protein Serine/Threonine Kinase Activity (GO:0071901)	2/80	0.0465311	0.198968	0	0	6.05495	18.5744	PTPRJ;SLC8A1
Regulation Of Protein Localization To Plasma Membrane (GO:1903076)	2/80	0.0465311	0.198968	0	0	6.05495	18.5744	SPTBN1;BCL2L1
Supramolecular Fiber Organization (GO:0097435)	4/316	0.0474054	0.198968	0	0	3.06473	9.34442	CLIP1;TLL2;MAP4;NCKAP5
Endocytosis (GO:0006897)	3/189	0.0480634	0.198968	0	0	3.83366	11.636	ANXA3;AXL;DNM1
Regulation Of Cell Division (GO:0051302)	2/83	0.0497002	0.198968	0	0	5.82981	17.4996	FGFR2;BCL2L1
Neutrophil Mediated Immunity (GO:0002446)	1/12	0.0504103	0.198968	0	0	21.2866	63.5951	ANXA3
Regulation Of Platelet-Derived Growth Factor Receptor Signaling Pathway (GO:0010640)	1/12	0.0504103	0.198968	0	0	21.2866	63.5951	PTPRJ
Calcium Ion Import (GO:0070509)	1/12	0.0504103	0.198968	0	0	21.2866	63.5951	SLC8A1
Relaxation Of Cardiac Muscle (GO:0055119)	1/12	0.0504103	0.198968	0	0	21.2866	63.5951	SLC8A1
Endothelium Development (GO:0003158)	1/12	0.0504103	0.198968	0	0	21.2866	63.5951	FSTL1
Positive Regulation Of Integrin-Mediated Signaling Pathway (GO:2001046)	1/12	0.0504103	0.198968	0	0	21.2866	63.5951	LIMS2
Fibrinolysis (GO:0042730)	1/12	0.0504103	0.198968	0	0	21.2866	63.5951	SERPINE1
Regulation Of Actomyosin Structure Organization (GO:0110020)	1/12	0.0504103	0.198968	0	0	21.2866	63.5951	AKAP13
Regulation Of Cell Communication By Electrical Coupling (GO:0010649)	1/12	0.0504103	0.198968	0	0	21.2866	63.5951	SLC8A1
Negative Regulation Of Coagulation (GO:0050819)	1/12	0.0504103	0.198968	0	0	21.2866	63.5951	SERPINE1
Negative Regulation Of Complement Activation (GO:0045916)	1/12	0.0504103	0.198968	0	0	21.2866	63.5951	CD55
Regulation Of Signal Transduction (GO:0009966)	3/193	0.0505845	0.198968	0	0	3.75219	11.1969	SULF1;CD55;FGFR2
Regulation Of Kinase Activity (GO:0043549)	2/85	0.0518553	0.198968	0	0	5.68876	16.8347	AXL;FGFR2
Calcium-Mediated Signaling (GO:0019722)	2/85	0.0518553	0.198968	0	0	5.68876	16.8347	PTPRJ;SLC8A1
Positive Regulation Of Endothelial Cell Migration (GO:0010595)	2/85	0.0518553	0.198968	0	0	5.68876	16.8347	ANXA3;PRKCA
Integrin-Mediated Signaling Pathway (GO:0007229)	2/85	0.0518553	0.198968	0	0	5.68876	16.8347	ITGA5;ITGA9
Mitotic Spindle Organization (GO:0007052)	2/85	0.0518553	0.198968	0	0	5.68876	16.8347	MAP4;CLASP1
Endomembrane System Organization (GO:0010256)	3/196	0.0525171	0.198968	0	0	3.6933	10.8827	DNM1;SPTBN1;CLASP1
Negative Regulation Of Angiogenesis (GO:0016525)	2/86	0.0529452	0.198968	0	0	5.62075	16.5166	SERPINE1;SULF1
Negative Regulation Of Fibroblast Growth Factor Receptor Signaling Pathway (GO:0040037)	1/13	0.054496	0.198968	0	0	19.5118	56.772	SULF1
Regulation Of Humoral Immune Response (GO:0002920)	1/13	0.054496	0.198968	0	0	19.5118	56.772	CD55
Regulation Of Immune Effector Process (GO:0002697)	1/13	0.054496	0.198968	0	0	19.5118	56.772	CD55
Nucleotide-Sugar Metabolic Process (GO:0009225)	1/13	0.054496	0.198968	0	0	19.5118	56.772	GFPT2
Relaxation Of Muscle (GO:0090075)	1/13	0.054496	0.198968	0	0	19.5118	56.772	SLC8A1
Chondroitin Sulfate Biosynthetic Process (GO:0030206)	1/13	0.054496	0.198968	0	0	19.5118	56.772	UGDH
Positive Regulation Of Cardiac Muscle Cell Proliferation (GO:0060045)	1/13	0.054496	0.198968	0	0	19.5118	56.772	FGFR2
Endothelial Cell Differentiation (GO:0045446)	1/13	0.054496	0.198968	0	0	19.5118	56.772	FSTL1
Sodium-Independent Organic Anion Transport (GO:0043252)	1/13	0.054496	0.198968	0	0	19.5118	56.772	SLCO3A1
Glomerular Filtration (GO:0003094)	1/13	0.054496	0.198968	0	0	19.5118	56.772	SULF1
Heparan Sulfate Proteoglycan Metabolic Process (GO:0030201)	1/13	0.054496	0.198968	0	0	19.5118	56.772	SULF1
Membrane Depolarization During Action Potential (GO:0086010)	1/13	0.054496	0.198968	0	0	19.5118	56.772	SLC8A1
Regulation Of Endothelial Cell Migration (GO:0010594)	2/88	0.0551496	0.198968	0	0	5.48948	15.9069	ANXA3;PRKCA
Cellular Response To Peptide Hormone Stimulus (GO:0071375)	2/89	0.0562639	0.198968	0	0	5.42611	15.6147	CPEB1;TBC1D4
Negative Regulation Of Apoptotic Process (GO:0043066)	5/482	0.0567651	0.198968	0	0	2.51534	7.21608	AXL;PRKCA;ITGA5;FSTL1;BCL2L1
Regulation Of Peptidyl-Tyrosine Phosphorylation (GO:0050730)	2/90	0.057386	0.198968	0	0	5.36418	15.3306	PTPRJ;ITGA5
Lymphocyte Differentiation (GO:0030098)	2/91	0.058516	0.198968	0	0	5.30364	15.0541	AXL;PTPRJ
Negative Regulation Of Smooth Muscle Cell Migration (GO:0014912)	1/14	0.0585643	0.198968	0	0	18.01	51.1056	SERPINE1
Regulation Of Macrophage Differentiation (GO:0045649)	1/14	0.0585643	0.198968	0	0	18.01	51.1056	PRKCA
Aorta Development (GO:0035904)	1/14	0.0585643	0.198968	0	0	18.01	51.1056	ROBO1
Bone Morphogenesis (GO:0060349)	1/14	0.0585643	0.198968	0	0	18.01	51.1056	FGFR2
Cardiac Cell Development (GO:0055006)	1/14	0.0585643	0.198968	0	0	18.01	51.1056	SLC8A1
Response To Muscle Stretch (GO:0035994)	1/14	0.0585643	0.198968	0	0	18.01	51.1056	SLC8A1
Embryonic Cranial Skeleton Morphogenesis (GO:0048701)	1/14	0.0585643	0.198968	0	0	18.01	51.1056	FGFR2
Smooth Muscle Contraction (GO:0006939)	1/14	0.0585643	0.198968	0	0	18.01	51.1056	SLC8A1
Glucosamine-Containing Compound Metabolic Process (GO:1901071)	1/14	0.0585643	0.198968	0	0	18.01	51.1056	LARGE1
Icosanoid Transport (GO:0071715)	1/14	0.0585643	0.198968	0	0	18.01	51.1056	SLCO3A1
Positive Regulation Of Response To Cytokine Stimulus (GO:0060760)	1/14	0.0585643	0.198968	0	0	18.01	51.1056	AXL
Negative Regulation Of Cilium Assembly (GO:1902018)	1/14	0.0585643	0.198968	0	0	18.01	51.1056	MAP4
Regulation Of Endothelial Cell Proliferation (GO:0001936)	2/93	0.060799	0.201535	0	0	5.18655	14.5233	PRKCA;SULF1
Positive Regulation Of Protein Kinase B Signaling (GO:0051897)	2/93	0.060799	0.201535	0	0	5.18655	14.5233	AXL;PTPRJ
Protein O-linked Glycosylation (GO:0006493)	2/93	0.060799	0.201535	0	0	5.18655	14.5233	GALNT16;LARGE1
Negative Regulation Of Immune Effector Process (GO:0002698)	1/15	0.0626153	0.201535	0	0	16.7227	46.3343	CD55
N-acetylglucosamine Metabolic Process (GO:0006044)	1/15	0.0626153	0.201535	0	0	16.7227	46.3343	LARGE1
Regulation Of Intrinsic Apoptotic Signaling Pathway In Response To DNA Damage (GO:1902229)	1/15	0.0626153	0.201535	0	0	16.7227	46.3343	BCL2L1
Negative Regulation Of Protein Processing (GO:0010955)	1/15	0.0626153	0.201535	0	0	16.7227	46.3343	SERPINE1
Regulation Of Lipoprotein Lipase Activity (GO:0051004)	1/15	0.0626153	0.201535	0	0	16.7227	46.3343	PCSK6
Adenylate Cyclase-Activating Adrenergic Receptor Signaling Pathway (GO:0071880)	1/15	0.0626153	0.201535	0	0	16.7227	46.3343	AKAP13
Platelet-Derived Growth Factor Receptor Signaling Pathway (GO:0048008)	1/15	0.0626153	0.201535	0	0	16.7227	46.3343	PTPRJ
Renal Filtration (GO:0097205)	1/15	0.0626153	0.201535	0	0	16.7227	46.3343	SULF1
Digestive Tract Morphogenesis (GO:0048546)	1/15	0.0626153	0.201535	0	0	16.7227	46.3343	FGFR2
Positive Regulation Of Sprouting Angiogenesis (GO:1903672)	1/15	0.0626153	0.201535	0	0	16.7227	46.3343	ITGA5
Positive Regulation Of Supramolecular Fiber Organization (GO:1902905)	2/96	0.0642801	0.202237	0	0	5.02026	13.7781	CLIP1;CLASP1
Regulation Of Fibrinolysis (GO:0051917)	1/16	0.066649	0.202237	0	0	15.6071	42.2688	SERPINE1
Negative Regulation Of Release Of Cytochrome C From Mitochondria (GO:0090201)	1/16	0.066649	0.202237	0	0	15.6071	42.2688	BCL2L1
Regulation Of Osteoblast Proliferation (GO:0033688)	1/16	0.066649	0.202237	0	0	15.6071	42.2688	FGFR2
Regulation Of Plasminogen Activation (GO:0010755)	1/16	0.066649	0.202237	0	0	15.6071	42.2688	SERPINE1
Cell Communication By Electrical Coupling Involved In Cardiac Conduction (GO:0086064)	1/16	0.066649	0.202237	0	0	15.6071	42.2688	SLC8A1
Chondroitin Sulfate Metabolic Process (GO:0030204)	1/16	0.066649	0.202237	0	0	15.6071	42.2688	UGDH
Positive Regulation Of Cardiac Muscle Tissue Growth (GO:0055023)	1/16	0.066649	0.202237	0	0	15.6071	42.2688	FGFR2
Extrinsic Apoptotic Signaling Pathway In Absence Of Ligand (GO:0097192)	1/16	0.066649	0.202237	0	0	15.6071	42.2688	BCL2L1
Positive Regulation Of Muscle Hypertrophy (GO:0014742)	1/16	0.066649	0.202237	0	0	15.6071	42.2688	PRKCA
Protein O-linked Mannosylation (GO:0035269)	1/16	0.066649	0.202237	0	0	15.6071	42.2688	LARGE1
Membrane Depolarization During Cardiac Muscle Cell Action Potential (GO:0086012)	1/16	0.066649	0.202237	0	0	15.6071	42.2688	SLC8A1
Mesonephric Tubule Development (GO:0072164)	1/16	0.066649	0.202237	0	0	15.6071	42.2688	FGFR2
Negative Regulation Of Anoikis (GO:2000811)	1/16	0.066649	0.202237	0	0	15.6071	42.2688	ITGA5
Regulation Of Cardiac Muscle Contraction By Regulation Of The Release Of Sequestered Calcium Ion (GO:0010881)	1/16	0.066649	0.202237	0	0	15.6071	42.2688	SLC8A1
Cellular Response To Insulin Stimulus (GO:0032869)	2/99	0.067827	0.20259	0	0	4.86426	13.0887	CPEB1;TBC1D4
Protein Complex Oligomerization (GO:0051259)	2/100	0.0690235	0.20259	0	0	4.81438	12.8703	UGDH;MAT2A
Carboxylic Acid Biosynthetic Process (GO:0046394)	1/17	0.0706656	0.20259	0	0	14.6309	38.7688	UGDH
Cell Migration Involved In Sprouting Angiogenesis (GO:0002042)	1/17	0.0706656	0.20259	0	0	14.6309	38.7688	ROBO1
Cellular Response To Alkaloid (GO:0071312)	1/17	0.0706656	0.20259	0	0	14.6309	38.7688	SLC8A1
Polyol Metabolic Process (GO:0019751)	1/17	0.0706656	0.20259	0	0	14.6309	38.7688	INPP4B
Positive Chemotaxis (GO:0050918)	1/17	0.0706656	0.20259	0	0	14.6309	38.7688	PTPRJ
Positive Regulation Of Alpha-Beta T Cell Proliferation (GO:0046641)	1/17	0.0706656	0.20259	0	0	14.6309	38.7688	CD55
Response To Interferon-Alpha (GO:0035455)	1/17	0.0706656	0.20259	0	0	14.6309	38.7688	AXL
Positive Regulation Of Cardiac Muscle Hypertrophy (GO:0010613)	1/17	0.0706656	0.20259	0	0	14.6309	38.7688	PRKCA
Positive Regulation Of Cartilage Development (GO:0061036)	1/17	0.0706656	0.20259	0	0	14.6309	38.7688	ZBTB16
Hippo Signaling (GO:0035329)	1/17	0.0706656	0.20259	0	0	14.6309	38.7688	TEAD1
Mesenchyme Development (GO:0060485)	1/17	0.0706656	0.20259	0	0	14.6309	38.7688	FGFR2
Microtubule Depolymerization (GO:0007019)	1/17	0.0706656	0.20259	0	0	14.6309	38.7688	NCKAP5
Regulation Of Cartilage Development (GO:0061035)	1/17	0.0706656	0.20259	0	0	14.6309	38.7688	ZBTB16
Positive Regulation Of Kinase Activity (GO:0033674)	2/104	0.0738787	0.20259	0	0	4.62465	12.0487	AXL;FGFR2
Adrenergic Receptor Signaling Pathway (GO:0071875)	1/18	0.0746652	0.20259	0	0	13.7696	35.7284	AKAP13
Regulation Of Mitochondrial Membrane Permeability (GO:0046902)	1/18	0.0746652	0.20259	0	0	13.7696	35.7284	BCL2L1
Positive Regulation Of G Protein-Coupled Receptor Signaling Pathway (GO:0045745)	1/18	0.0746652	0.20259	0	0	13.7696	35.7284	PRKCA
Positive Regulation Of Extracellular Matrix Organization (GO:1903055)	1/18	0.0746652	0.20259	0	0	13.7696	35.7284	CLASP1
Energy Reserve Metabolic Process (GO:0006112)	1/18	0.0746652	0.20259	0	0	13.7696	35.7284	GFPT2
Positive Regulation Of Focal Adhesion Assembly (GO:0051894)	1/18	0.0746652	0.20259	0	0	13.7696	35.7284	PTPRJ
Positive Regulation Of Monocyte Chemotaxis (GO:0090026)	1/18	0.0746652	0.20259	0	0	13.7696	35.7284	SERPINE1
Positive Regulation Of Natural Killer Cell Activation (GO:0032816)	1/18	0.0746652	0.20259	0	0	13.7696	35.7284	AXL
Positive Regulation Of Neuroblast Proliferation (GO:0002052)	1/18	0.0746652	0.20259	0	0	13.7696	35.7284	VCAN
Ureteric Bud Development (GO:0001657)	1/18	0.0746652	0.20259	0	0	13.7696	35.7284	FGFR2
Intracellular Sodium Ion Homeostasis (GO:0006883)	1/18	0.0746652	0.20259	0	0	13.7696	35.7284	SLC8A1
Pulmonary Valve Morphogenesis (GO:0003184)	1/18	0.0746652	0.20259	0	0	13.7696	35.7284	ROBO1
Regulation Of T Cell Cytokine Production (GO:0002724)	1/18	0.0746652	0.20259	0	0	13.7696	35.7284	CD55
Negative Regulation Of ERBB Signaling Pathway (GO:1901185)	1/18	0.0746652	0.20259	0	0	13.7696	35.7284	PTPRJ
Negative Regulation Of T Cell Receptor Signaling Pathway (GO:0050860)	1/18	0.0746652	0.20259	0	0	13.7696	35.7284	PTPRJ
Cellular Response To Organonitrogen Compound (GO:0071417)	2/105	0.0751094	0.203003	0	0	4.57952	11.8555	CPEB1;CTNNA1
Negative Regulation Of Intracellular Signal Transduction (GO:1902532)	3/231	0.0776002	0.203003	0	0	3.1208	7.97734	PDE10A;PTPRJ;BCL2L1
Positive Regulation Of Phosphorylation (GO:0042327)	3/231	0.0776002	0.203003	0	0	3.1208	7.97734	SLCO3A1;AXL;FGFR2
Regulation Of Fibroblast Growth Factor Receptor Signaling Pathway (GO:0040036)	1/19	0.0786477	0.203003	0	0	13.0039	33.0661	SULF1
Regulation Of Integrin-Mediated Signaling Pathway (GO:2001044)	1/19	0.0786477	0.203003	0	0	13.0039	33.0661	LIMS2
Regulation Of Smooth Muscle Cell Migration (GO:0014910)	1/19	0.0786477	0.203003	0	0	13.0039	33.0661	SERPINE1
Regulation Of Vascular Endothelial Growth Factor Signaling Pathway (GO:1900746)	1/19	0.0786477	0.203003	0	0	13.0039	33.0661	ROBO1
Release Of Cytochrome C From Mitochondria (GO:0001836)	1/19	0.0786477	0.203003	0	0	13.0039	33.0661	BCL2L1
Chondroitin Sulfate Proteoglycan Biosynthetic Process (GO:0050650)	1/19	0.0786477	0.203003	0	0	13.0039	33.0661	UGDH
Positive Regulation Of Alpha-Beta T Cell Activation (GO:0046635)	1/19	0.0786477	0.203003	0	0	13.0039	33.0661	CD55
Embryonic Digestive Tract Development (GO:0048566)	1/19	0.0786477	0.203003	0	0	13.0039	33.0661	FGFR2
Gastrulation (GO:0007369)	1/19	0.0786477	0.203003	0	0	13.0039	33.0661	UGDH
Glycosphingolipid Biosynthetic Process (GO:0006688)	1/19	0.0786477	0.203003	0	0	13.0039	33.0661	LARGE1
Protein Heterooligomerization (GO:0051291)	1/19	0.0786477	0.203003	0	0	13.0039	33.0661	MAT2A
Negative Regulation Of Axon Extension Involved In Axon Guidance (GO:0048843)	1/19	0.0786477	0.203003	0	0	13.0039	33.0661	SEMA3C
Cell-Matrix Adhesion (GO:0007160)	2/109	0.0800971	0.203375	0	0	4.40743	11.1266	ITGA5;ITGA9
Positive Regulation Of Wnt Signaling Pathway (GO:0030177)	2/109	0.0800971	0.203375	0	0	4.40743	11.1266	SULF1;FGFR2
Regulation Of Wnt Signaling Pathway (GO:0030111)	2/109	0.0800971	0.203375	0	0	4.40743	11.1266	SULF1;FGFR2
Negative Regulation Of Microtubule Depolymerization (GO:0007026)	1/20	0.0826133	0.203375	0	0	12.3189	30.7182	CLASP1
Negative Regulation Of Protein Localization To Cell Periphery (GO:1904376)	1/20	0.0826133	0.203375	0	0	12.3189	30.7182	BCL2L1
Negative Regulation Of Protein Localization To Plasma Membrane (GO:1903077)	1/20	0.0826133	0.203375	0	0	12.3189	30.7182	BCL2L1
Negative Regulation Of Reproductive Process (GO:2000242)	1/20	0.0826133	0.203375	0	0	12.3189	30.7182	SULF1
Calcium-Mediated Signaling Using Intracellular Calcium Source (GO:0035584)	1/20	0.0826133	0.203375	0	0	12.3189	30.7182	PTPRJ
Regulation Of Protein Localization To Cell Periphery (GO:1904375)	1/20	0.0826133	0.203375	0	0	12.3189	30.7182	SPTBN1
Phosphatidylserine Metabolic Process (GO:0006658)	1/20	0.0826133	0.203375	0	0	12.3189	30.7182	PLA1A
Positive Regulation Of Phospholipase Activity (GO:0010518)	1/20	0.0826133	0.203375	0	0	12.3189	30.7182	FGFR2
Pulmonary Valve Development (GO:0003177)	1/20	0.0826133	0.203375	0	0	12.3189	30.7182	ROBO1
Regulation Of Cardiac Muscle Cell Proliferation (GO:0060043)	1/20	0.0826133	0.203375	0	0	12.3189	30.7182	FGFR2
Regulation Of Cardiac Muscle Contraction By Calcium Ion Signaling (GO:0010882)	1/20	0.0826133	0.203375	0	0	12.3189	30.7182	SLC8A1
Cytoskeleton Organization (GO:0007010)	2/111	0.082629	0.203375	0	0	4.32612	10.7867	MAST2;MICAL2
Regulation Of MAP Kinase Activity (GO:0043405)	2/114	0.0864725	0.205423	0	0	4.20961	10.3048	PTPRJ;ROBO1
Negative Regulation Of Osteoclast Differentiation (GO:0045671)	1/21	0.086562	0.205423	0	0	11.7024	28.6344	FBN1
Aminoglycan Biosynthetic Process (GO:0006023)	1/21	0.086562	0.205423	0	0	11.7024	28.6344	UGDH
Positive Regulation Of T Cell Cytokine Production (GO:0002726)	1/21	0.086562	0.205423	0	0	11.7024	28.6344	CD55
Positive Regulation Of Blood Coagulation (GO:0030194)	1/21	0.086562	0.205423	0	0	11.7024	28.6344	SERPINE1
Sodium Ion Import Across Plasma Membrane (GO:0098719)	1/21	0.086562	0.205423	0	0	11.7024	28.6344	SLC8A1
Lipid Catabolic Process (GO:0016042)	1/21	0.086562	0.205423	0	0	11.7024	28.6344	PLA1A
Protein Mannosylation (GO:0035268)	1/21	0.086562	0.205423	0	0	11.7024	28.6344	LARGE1
Regulation Of Anoikis (GO:2000209)	1/21	0.086562	0.205423	0	0	11.7024	28.6344	ITGA5
Negative Regulation Of Biomineral Tissue Development (GO:0070168)	1/21	0.086562	0.205423	0	0	11.7024	28.6344	ASPN
Regulation Of Cardiac Conduction (GO:1903779)	1/21	0.086562	0.205423	0	0	11.7024	28.6344	SLC8A1
Regulation Of Cell-Substrate Junction Assembly (GO:0090109)	1/21	0.086562	0.205423	0	0	11.7024	28.6344	CLASP1
Cellular Response To Molecule Of Bacterial Origin (GO:0071219)	2/117	0.0903692	0.208529	0	0	4.09917	9.8538	AXL;SERPINE1
Protein Processing (GO:0016485)	2/117	0.0903692	0.208529	0	0	4.09917	9.8538	TLL2;PCSK6
Negative Regulation Of Extrinsic Apoptotic Signaling Pathway In Absence Of Ligand (GO:2001240)	1/22	0.0904939	0.208529	0	0	11.1445	26.7745	BCL2L1
Negative Regulation Of Myeloid Cell Differentiation (GO:0045638)	1/22	0.0904939	0.208529	0	0	11.1445	26.7745	ZBTB16
Negative Regulation Of Protein Localization To Nucleus (GO:1900181)	1/22	0.0904939	0.208529	0	0	11.1445	26.7745	CTNNA1
Negative Regulation Of Signal Transduction In Absence Of Ligand (GO:1901099)	1/22	0.0904939	0.208529	0	0	11.1445	26.7745	BCL2L1
Blood Vessel Endothelial Cell Migration (GO:0043534)	1/22	0.0904939	0.208529	0	0	11.1445	26.7745	ROBO1
Regulation Of Release Of Sequestered Calcium Ion Into Cytosol By Sarcoplasmic Reticulum (GO:0010880)	1/22	0.0904939	0.208529	0	0	11.1445	26.7745	SLC8A1
Regulation Of Vascular Endothelial Growth Factor Receptor Signaling Pathway (GO:0030947)	1/22	0.0904939	0.208529	0	0	11.1445	26.7745	ITGA5
Inositol Phosphate Metabolic Process (GO:0043647)	1/22	0.0904939	0.208529	0	0	11.1445	26.7745	INPP4B
Regulation Of Small GTPase Mediated Signal Transduction (GO:0051056)	2/118	0.0916796	0.209191	0	0	4.06363	9.70986	AKAP13;ARHGEF28
Negative Regulation Of Epidermal Growth Factor Receptor Signaling Pathway (GO:0042059)	1/23	0.0944091	0.209191	0	0	10.6374	25.1056	PTPRJ
Negative Regulation Of Protein Depolymerization (GO:1901880)	1/23	0.0944091	0.209191	0	0	10.6374	25.1056	CLASP1
Artery Development (GO:0060840)	1/23	0.0944091	0.209191	0	0	10.6374	25.1056	ROBO1
Positive Regulation Of Cell-Substrate Junction Organization (GO:0150117)	1/23	0.0944091	0.209191	0	0	10.6374	25.1056	PTPRJ
Heparan Sulfate Proteoglycan Biosynthetic Process (GO:0015012)	1/23	0.0944091	0.209191	0	0	10.6374	25.1056	UGDH
Microtubule Nucleation (GO:0007020)	1/23	0.0944091	0.209191	0	0	10.6374	25.1056	CLASP1
Regulation Of Axon Extension Involved In Axon Guidance (GO:0048841)	1/23	0.0944091	0.209191	0	0	10.6374	25.1056	SEMA3C
Regulation Of Cardiac Muscle Hypertrophy (GO:0010611)	1/23	0.0944091	0.209191	0	0	10.6374	25.1056	PRKCA
Regulation Of Cell Junction Assembly (GO:1901888)	1/23	0.0944091	0.209191	0	0	10.6374	25.1056	PDLIM5
Regulation Of Cytoplasmic Translation (GO:2000765)	1/24	0.0983076	0.209191	0	0	10.1744	23.6011	CPEB1
Regulation Of Microtubule Depolymerization (GO:0031114)	1/24	0.0983076	0.209191	0	0	10.1744	23.6011	CLASP1
Regulation Of Muscle Cell Differentiation (GO:0051147)	1/24	0.0983076	0.209191	0	0	10.1744	23.6011	FGFR2
Regulation Of Neuroblast Proliferation (GO:1902692)	1/24	0.0983076	0.209191	0	0	10.1744	23.6011	VCAN
Regulation Of Supramolecular Fiber Organization (GO:1902903)	1/24	0.0983076	0.209191	0	0	10.1744	23.6011	AKAP13
Positive Regulation Of BMP Signaling Pathway (GO:0030513)	1/24	0.0983076	0.209191	0	0	10.1744	23.6011	SULF1
Ear Morphogenesis (GO:0042471)	1/24	0.0983076	0.209191	0	0	10.1744	23.6011	FGFR2
Gliogenesis (GO:0042063)	1/24	0.0983076	0.209191	0	0	10.1744	23.6011	VCAN
Positive Regulation Of Vascular Endothelial Growth Factor Production (GO:0010575)	1/24	0.0983076	0.209191	0	0	10.1744	23.6011	SULF1
Negative Regulation Of Antigen Receptor-Mediated Signaling Pathway (GO:0050858)	1/24	0.0983076	0.209191	0	0	10.1744	23.6011	PTPRJ
Positive Regulation Of Epithelial Cell Proliferation (GO:0050679)	2/123	0.0983143	0.209191	0	0	3.89473	9.03415	PRKCA;FGFR2
Cellular Response To Lipopolysaccharide (GO:0071222)	2/124	0.0996573	0.209191	0	0	3.86261	8.90724	AXL;SERPINE1
Enzyme-Linked Receptor Protein Signaling Pathway (GO:0007167)	2/124	0.0996573	0.209191	0	0	3.86261	8.90724	AXL;FGFR2
Response To Cytokine (GO:0034097)	2/125	0.101006	0.209191	0	0	3.83101	8.7829	PRKCA;BCL2L1
Cellular Component Assembly (GO:0022607)	3/260	0.101655	0.209191	0	0	2.76457	6.32028	MITF;TEAD1;SPTBN1
Regulation Of Chondrocyte Differentiation (GO:0032330)	1/25	0.10219	0.209191	0	0	9.75	22.239	ZBTB16
Negative Regulation Of Intrinsic Apoptotic Signaling Pathway In Response To DNA Damage (GO:1902230)	1/25	0.10219	0.209191	0	0	9.75	22.239	BCL2L1
Negative Regulation Of Protein Localization To Membrane (GO:1905476)	1/25	0.10219	0.209191	0	0	9.75	22.239	BCL2L1
Regulation Of Keratinocyte Proliferation (GO:0010837)	1/25	0.10219	0.209191	0	0	9.75	22.239	FGFR2
Negative Regulation Of Response To Endoplasmic Reticulum Stress (GO:1903573)	1/25	0.10219	0.209191	0	0	9.75	22.239	BCL2L1
Negative Regulation Of Response To Wounding (GO:1903035)	1/25	0.10219	0.209191	0	0	9.75	22.239	SERPINE1
Negative Regulation Of Stress Fiber Assembly (GO:0051497)	1/25	0.10219	0.209191	0	0	9.75	22.239	CLASP1
Regulation Of Monocyte Chemotaxis (GO:0090025)	1/25	0.10219	0.209191	0	0	9.75	22.239	SERPINE1
Regulation Of Neutrophil Chemotaxis (GO:0090022)	1/25	0.10219	0.209191	0	0	9.75	22.239	DPP4
Regulation Of Platelet Aggregation (GO:0090330)	1/25	0.10219	0.209191	0	0	9.75	22.239	PRKCA
Regulation Of Postsynapse Organization (GO:0099175)	1/25	0.10219	0.209191	0	0	9.75	22.239	PDLIM5
Regulation Of Synapse Organization (GO:0050807)	1/25	0.10219	0.209191	0	0	9.75	22.239	PDLIM5
Sodium Ion Homeostasis (GO:0055078)	1/25	0.10219	0.209191	0	0	9.75	22.239	SLC8A1
Positive Regulation Of Interleukin-2 Production (GO:0032743)	1/25	0.10219	0.209191	0	0	9.75	22.239	SPTBN1
Ventricular Cardiac Muscle Tissue Development (GO:0003229)	1/25	0.10219	0.209191	0	0	9.75	22.239	FGFR2
Wound Healing, Spreading Of Cells (GO:0044319)	1/25	0.10219	0.209191	0	0	9.75	22.239	ITGA5
Inner Ear Morphogenesis (GO:0042472)	1/25	0.10219	0.209191	0	0	9.75	22.239	FGFR2
Proteoglycan Metabolic Process (GO:0006029)	1/25	0.10219	0.209191	0	0	9.75	22.239	SULF1
Protein-Containing Complex Organization (GO:0043933)	2/126	0.102359	0.209191	0	0	3.79992	8.66105	MITF;TEAD1
Negative Regulation Of Endothelial Cell Apoptotic Process (GO:2000352)	1/26	0.106055	0.214539	0	0	9.35953	21.0009	SERPINE1
Regulation Of Myeloid Cell Differentiation (GO:0045637)	1/26	0.106055	0.214539	0	0	9.35953	21.0009	ZBTB16
Camera-Type Eye Development (GO:0043010)	1/26	0.106055	0.214539	0	0	9.35953	21.0009	FBN1
Regulation Of Vascular Endothelial Growth Factor Production (GO:0010574)	1/26	0.106055	0.214539	0	0	9.35953	21.0009	SULF1
Positive Regulation Of Peptidyl-Tyrosine Phosphorylation (GO:0050731)	2/130	0.107822	0.216808	0	0	3.68043	8.19732	PTPRJ;ITGA5
Regulation Of Extrinsic Apoptotic Signaling Pathway In Absence Of Ligand (GO:2001239)	1/27	0.109904	0.216808	0	0	8.9991	19.8713	BCL2L1
Regulation Of Microtubule Polymerization Or Depolymerization (GO:0031110)	1/27	0.109904	0.216808	0	0	8.9991	19.8713	CLASP1
Cellular Response To Acid Chemical (GO:0071229)	1/27	0.109904	0.216808	0	0	8.9991	19.8713	CPEB1
Cellular Response To Epidermal Growth Factor Stimulus (GO:0071364)	1/27	0.109904	0.216808	0	0	8.9991	19.8713	PDE8A
Respiratory Tube Development (GO:0030323)	1/27	0.109904	0.216808	0	0	8.9991	19.8713	FGFR2
Dorsal/Ventral Pattern Formation (GO:0009953)	1/27	0.109904	0.216808	0	0	8.9991	19.8713	TLL2
Positive Regulation Of Mitotic Cell Cycle (GO:0045931)	1/27	0.109904	0.216808	0	0	8.9991	19.8713	PRKCA
Ventricular Septum Morphogenesis (GO:0060412)	1/27	0.109904	0.216808	0	0	8.9991	19.8713	ROBO1
In Utero Embryonic Development (GO:0001701)	1/27	0.109904	0.216808	0	0	8.9991	19.8713	FGFR2
Epithelial Cell Differentiation (GO:0030855)	2/132	0.110583	0.217607	0	0	3.62344	7.97879	FSTL1;FGFR2
Positive Regulation Of Cell Migration (GO:0030335)	3/272	0.112386	0.217881	0	0	2.63963	5.76975	SEMA3C;PRKCA;CLASP1
Positive Regulation Of Cellular Process (GO:0048522)	5/594	0.112713	0.217881	0	0	2.0253	4.42104	DPP4;PTPRJ;PRKCA;TEAD1;FGFR2
Golgi To Plasma Membrane Protein Transport (GO:0043001)	1/28	0.113736	0.217881	0	0	8.66536	18.8374	SPTBN1
Regulation Of Platelet Activation (GO:0010543)	1/28	0.113736	0.217881	0	0	8.66536	18.8374	PRKCA
Regulation Of Protein Localization To Membrane (GO:1905475)	1/28	0.113736	0.217881	0	0	8.66536	18.8374	SPTBN1
Glycosaminoglycan Metabolic Process (GO:0030203)	1/28	0.113736	0.217881	0	0	8.66536	18.8374	UGDH
Vascular Endothelial Growth Factor Receptor Signaling Pathway (GO:0048010)	1/28	0.113736	0.217881	0	0	8.66536	18.8374	SULF1
Membrane Fusion (GO:0061025)	1/28	0.113736	0.217881	0	0	8.66536	18.8374	DPP4
Negative Regulation Of Actin Filament Bundle Assembly (GO:0032232)	1/28	0.113736	0.217881	0	0	8.66536	18.8374	CLASP1
Regulation Of Bone Resorption (GO:0045124)	1/28	0.113736	0.217881	0	0	8.66536	18.8374	PRKCA
Negative Regulation Of Cytoskeleton Organization (GO:0051494)	1/28	0.113736	0.217881	0	0	8.66536	18.8374	CLASP1
Regulation Of Protein Kinase B Signaling (GO:0051896)	2/136	0.11616	0.2194	0	0	3.51457	7.56613	AXL;PTPRJ
Regulation Of Muscle Contraction (GO:0006937)	1/29	0.117553	0.2194	0	0	8.35546	17.8879	PPP1R12B
Carbohydrate Derivative Biosynthetic Process (GO:1901137)	1/29	0.117553	0.2194	0	0	8.35546	17.8879	LARGE1
Cardiac Muscle Cell Action Potential (GO:0086001)	1/29	0.117553	0.2194	0	0	8.35546	17.8879	SLC8A1
Peptidyl-Tyrosine Dephosphorylation (GO:0035335)	1/29	0.117553	0.2194	0	0	8.35546	17.8879	PTPRJ
Chondrocyte Differentiation (GO:0002062)	1/29	0.117553	0.2194	0	0	8.35546	17.8879	SULF1
Positive Regulation Of Neural Precursor Cell Proliferation (GO:2000179)	1/29	0.117553	0.2194	0	0	8.35546	17.8879	VCAN
Heterotypic Cell-Cell Adhesion (GO:0034113)	1/29	0.117553	0.2194	0	0	8.35546	17.8879	ITGA5
Morphogenesis Of An Epithelium (GO:0002009)	1/29	0.117553	0.2194	0	0	8.35546	17.8879	FGFR2
Regulation Of Blood Coagulation (GO:0030193)	1/29	0.117553	0.2194	0	0	8.35546	17.8879	SERPINE1
Protein Localization To Plasma Membrane (GO:0072659)	2/137	0.117565	0.2194	0	0	3.48836	7.46775	TSPAN5;SPTBN1
Regulation Of Dendritic Spine Morphogenesis (GO:0061001)	1/30	0.121353	0.222807	0	0	8.06694	17.0136	PDLIM5
Negative Regulation Of Myeloid Leukocyte Differentiation (GO:0002762)	1/30	0.121353	0.222807	0	0	8.06694	17.0136	FBN1
Response To Amino Acid (GO:0043200)	1/30	0.121353	0.222807	0	0	8.06694	17.0136	CPEB1
Response To Epidermal Growth Factor (GO:0070849)	1/30	0.121353	0.222807	0	0	8.06694	17.0136	PDE8A
Embryonic Skeletal System Morphogenesis (GO:0048704)	1/30	0.121353	0.222807	0	0	8.06694	17.0136	FGFR2
Negative Regulation Of Axon Extension (GO:0030517)	1/30	0.121353	0.222807	0	0	8.06694	17.0136	SEMA3C
Negative Regulation Of Blood Coagulation (GO:0030195)	1/30	0.121353	0.222807	0	0	8.06694	17.0136	SERPINE1
Central Nervous System Development (GO:0007417)	3/283	0.122588	0.224556	0	0	2.53451	5.31975	ZBTB16;MSI2;SPTBN1
Protein Localization To Cell Periphery (GO:1990778)	2/142	0.124656	0.225586	0	0	3.36293	7.00227	TSPAN5;SPTBN1
Negative Regulation Of Microtubule Polymerization Or Depolymerization (GO:0031111)	1/31	0.125137	0.225586	0	0	7.79765	16.2062	CLASP1
Cardiac Muscle Tissue Morphogenesis (GO:0055008)	1/31	0.125137	0.225586	0	0	7.79765	16.2062	FGFR2
Regulation Of Response To Biotic Stimulus (GO:0002831)	1/31	0.125137	0.225586	0	0	7.79765	16.2062	CD55
Positive Regulation Of Mononuclear Cell Migration (GO:0071677)	1/31	0.125137	0.225586	0	0	7.79765	16.2062	SERPINE1
Presynaptic Endocytosis (GO:0140238)	1/31	0.125137	0.225586	0	0	7.79765	16.2062	DNM1
Negative Regulation Of Cell-Matrix Adhesion (GO:0001953)	1/31	0.125137	0.225586	0	0	7.79765	16.2062	SERPINE1
Positive Regulation Of Transferase Activity (GO:0051347)	2/143	0.126087	0.226785	0	0	3.33891	6.91416	AXL;FGFR2
Regulation Of Cell Adhesion (GO:0030155)	2/144	0.127521	0.228238	0	0	3.31522	6.82762	PTPRJ;PRKCA
Respiratory System Development (GO:0060541)	1/32	0.128904	0.228238	0	0	7.54573	15.4588	FGFR2
Glycosphingolipid Metabolic Process (GO:0006687)	1/32	0.128904	0.228238	0	0	7.54573	15.4588	LARGE1
Mesenchymal Cell Migration (GO:0090497)	1/32	0.128904	0.228238	0	0	7.54573	15.4588	SEMA3C
Proteoglycan Biosynthetic Process (GO:0030166)	1/32	0.128904	0.228238	0	0	7.54573	15.4588	UGDH
Mitochondrial Membrane Organization (GO:0007006)	1/32	0.128904	0.228238	0	0	7.54573	15.4588	BCL2L1
Muscle Cell Development (GO:0055001)	1/32	0.128904	0.228238	0	0	7.54573	15.4588	SLC8A1
Cardiac Muscle Contraction (GO:0060048)	1/33	0.132656	0.232294	0	0	7.30956	14.7653	SLC8A1
Regulation Of Sprouting Angiogenesis (GO:1903670)	1/33	0.132656	0.232294	0	0	7.30956	14.7653	ITGA5
Positive Regulation Of Cytokine Production Involved In Immune Response (GO:0002720)	1/33	0.132656	0.232294	0	0	7.30956	14.7653	CD55
Ventricular Cardiac Muscle Tissue Morphogenesis (GO:0055010)	1/33	0.132656	0.232294	0	0	7.30956	14.7653	FGFR2
Lung Development (GO:0030324)	1/33	0.132656	0.232294	0	0	7.30956	14.7653	FGFR2
Neuron Development (GO:0048666)	2/150	0.136208	0.235209	0	0	3.17986	6.33927	UGDH;MAP4
Apoptotic Mitochondrial Changes (GO:0008637)	1/34	0.136392	0.235209	0	0	7.0877	14.1203	BCL2L1
Semaphorin-Plexin Signaling Pathway (GO:0071526)	1/34	0.136392	0.235209	0	0	7.0877	14.1203	SEMA3C
Embryonic Skeletal System Development (GO:0048706)	1/34	0.136392	0.235209	0	0	7.0877	14.1203	SULF1
Establishment Of Mitotic Spindle Localization (GO:0040001)	1/34	0.136392	0.235209	0	0	7.0877	14.1203	CLASP1
Glial Cell Differentiation (GO:0010001)	1/34	0.136392	0.235209	0	0	7.0877	14.1203	VCAN
Regulation Of T Cell Receptor Signaling Pathway (GO:0050856)	1/34	0.136392	0.235209	0	0	7.0877	14.1203	PTPRJ
Cellular Response To Amino Acid Stimulus (GO:0071230)	1/35	0.140112	0.239546	0	0	6.87889	13.5192	CPEB1
Skeletal Muscle Organ Development (GO:0060538)	1/35	0.140112	0.239546	0	0	6.87889	13.5192	LARGE1
Positive Regulation Of Substrate Adhesion-Dependent Cell Spreading (GO:1900026)	1/35	0.140112	0.239546	0	0	6.87889	13.5192	LIMS2
Regulation Of Cardiac Muscle Contraction (GO:0055117)	1/35	0.140112	0.239546	0	0	6.87889	13.5192	SLC8A1
Positive Regulation Of Response To External Stimulus (GO:0032103)	2/155	0.143547	0.244302	0	0	3.07516	5.96918	SERPINE1;PRKCA
Negative Regulation Of Protein Kinase B Signaling (GO:0051898)	1/36	0.143816	0.244302	0	0	6.68202	12.9579	PTPRJ
Neural Crest Cell Migration (GO:0001755)	1/36	0.143816	0.244302	0	0	6.68202	12.9579	SEMA3C
Negative Regulation Of Endothelial Cell Proliferation (GO:0001937)	1/37	0.147504	0.246875	0	0	6.49608	12.4329	SULF1
Aortic Valve Morphogenesis (GO:0003180)	1/37	0.147504	0.246875	0	0	6.49608	12.4329	ROBO1
Regulation Of Ossification (GO:0030278)	1/37	0.147504	0.246875	0	0	6.49608	12.4329	ZBTB16
Calcium Ion Import Across Plasma Membrane (GO:0098703)	1/37	0.147504	0.246875	0	0	6.49608	12.4329	SLC8A1
Positive Regulation Of Exocytosis (GO:0045921)	1/37	0.147504	0.246875	0	0	6.49608	12.4329	CLASP1
Positive Regulation Of Immune Effector Process (GO:0002699)	1/37	0.147504	0.246875	0	0	6.49608	12.4329	PTPRJ
Ventricular Septum Development (GO:0003281)	1/37	0.147504	0.246875	0	0	6.49608	12.4329	ROBO1
Peptidyl-Serine Phosphorylation (GO:0018105)	2/158	0.14799	0.247168	0	0	3.01557	5.76158	MAST2;PRKCA
Response To Lipopolysaccharide (GO:0032496)	2/159	0.149477	0.248317	0	0	2.99621	5.69463	AXL;SERPINE1
Negative Regulation Of Epithelial Cell Apoptotic Process (GO:1904036)	1/38	0.151176	0.248317	0	0	6.32019	11.9408	SERPINE1
Positive Regulation Of Axonogenesis (GO:0050772)	1/38	0.151176	0.248317	0	0	6.32019	11.9408	ROBO1
Positive Regulation Of Bone Mineralization (GO:0030501)	1/38	0.151176	0.248317	0	0	6.32019	11.9408	SLC8A1
Establishment Of Protein Localization To Plasma Membrane (GO:0061951)	1/38	0.151176	0.248317	0	0	6.32019	11.9408	SPTBN1
Fatty Acid Transport (GO:0015908)	1/38	0.151176	0.248317	0	0	6.32019	11.9408	SLCO3A1
Heart Looping (GO:0001947)	1/38	0.151176	0.248317	0	0	6.32019	11.9408	MICAL2
Membrane Assembly (GO:0071709)	1/38	0.151176	0.248317	0	0	6.32019	11.9408	SPTBN1
Regulation Of Macromolecule Metabolic Process (GO:0060255)	2/162	0.153957	0.250697	0	0	2.93958	5.5002	UTY;SLC8A1
Negative Regulation Of Mitochondrion Organization (GO:0010823)	1/39	0.154833	0.250697	0	0	6.15356	11.4789	BCL2L1
Regulation Of Mitochondrial Membrane Potential (GO:0051881)	1/39	0.154833	0.250697	0	0	6.15356	11.4789	BCL2L1
Odontogenesis (GO:0042476)	1/39	0.154833	0.250697	0	0	6.15356	11.4789	FGFR2
Regulation Of Receptor-Mediated Endocytosis (GO:0048259)	1/39	0.154833	0.250697	0	0	6.15356	11.4789	SERPINE1
Digestive Tract Development (GO:0048565)	1/39	0.154833	0.250697	0	0	6.15356	11.4789	FGFR2
Positive Regulation Of Lymphocyte Differentiation (GO:0045621)	1/39	0.154833	0.250697	0	0	6.15356	11.4789	AXL
Regulation Of Cytokine-Mediated Signaling Pathway (GO:0001959)	1/40	0.158475	0.25248	0	0	5.99548	11.0446	AXL
Negative Regulation Of Protein Localization (GO:1903828)	1/40	0.158475	0.25248	0	0	5.99548	11.0446	CTNNA1
Regulation Of Microtubule Cytoskeleton Organization (GO:0070507)	1/40	0.158475	0.25248	0	0	5.99548	11.0446	CLASP1
Aortic Valve Development (GO:0003176)	1/40	0.158475	0.25248	0	0	5.99548	11.0446	ROBO1
Nucleic Acid-Templated Transcription (GO:0097659)	1/40	0.158475	0.25248	0	0	5.99548	11.0446	PDE10A
Synaptic Vesicle Endocytosis (GO:0048488)	1/40	0.158475	0.25248	0	0	5.99548	11.0446	DNM1
Positive Regulation Of Myeloid Leukocyte Differentiation (GO:0002763)	1/40	0.158475	0.25248	0	0	5.99548	11.0446	PRKCA
Positive Regulation Of Wound Healing (GO:0090303)	1/40	0.158475	0.25248	0	0	5.99548	11.0446	SERPINE1
Positive Regulation Of Cytokine Production (GO:0001819)	3/320	0.159186	0.253105	0	0	2.23446	4.10624	SERPINE1;SULF1;SPTBN1
Membrane Organization (GO:0061024)	2/167	0.161482	0.253681	0	0	2.84978	5.19619	DPP4;SPTBN1
Regulation Of Microtubule-Based Process (GO:0032886)	1/41	0.1621	0.253681	0	0	5.84529	10.6357	CLASP1
Regulation Of Release Of Cytochrome C From Mitochondria (GO:0090199)	1/41	0.1621	0.253681	0	0	5.84529	10.6357	BCL2L1
Stem Cell Differentiation (GO:0048863)	1/41	0.1621	0.253681	0	0	5.84529	10.6357	FGFR2
Heart Contraction (GO:0060047)	1/41	0.1621	0.253681	0	0	5.84529	10.6357	SLC8A1
Positive Regulation Of Response To Biotic Stimulus (GO:0002833)	1/41	0.1621	0.253681	0	0	5.84529	10.6357	PRKCA
Positive Regulation Of Viral Process (GO:0048524)	1/41	0.1621	0.253681	0	0	5.84529	10.6357	AXL
Regulation Of Amide Metabolic Process (GO:0034248)	1/41	0.1621	0.253681	0	0	5.84529	10.6357	MSI2
Regulation Of Osteoclast Differentiation (GO:0045670)	1/42	0.165711	0.254891	0	0	5.70244	10.2502	FBN1
Cardiac Ventricle Morphogenesis (GO:0003208)	1/42	0.165711	0.254891	0	0	5.70244	10.2502	FGFR2
Collagen Fibril Organization (GO:0030199)	1/42	0.165711	0.254891	0	0	5.70244	10.2502	TLL2
Determination Of Heart Left/Right Asymmetry (GO:0061371)	1/42	0.165711	0.254891	0	0	5.70244	10.2502	MICAL2
Embryonic Heart Tube Morphogenesis (GO:0003143)	1/42	0.165711	0.254891	0	0	5.70244	10.2502	MICAL2
Regulation Of Axonogenesis (GO:0050770)	1/42	0.165711	0.254891	0	0	5.70244	10.2502	ROBO1
Cell-Cell Adhesion Via Plasma-Membrane Adhesion Molecules (GO:0098742)	2/172	0.169073	0.254891	0	0	2.76527	4.91505	SDK1;ROBO1
Regulation Of Endothelial Cell Apoptotic Process (GO:2000351)	1/43	0.169306	0.254891	0	0	5.56639	9.88618	SERPINE1
Positive Regulation Of T Cell Mediated Immunity (GO:0002711)	1/43	0.169306	0.254891	0	0	5.56639	9.88618	CD55
Positive Regulation Of Biomineral Tissue Development (GO:0070169)	1/43	0.169306	0.254891	0	0	5.56639	9.88618	SLC8A1
Positive Regulation Of Cell Division (GO:0051781)	1/43	0.169306	0.254891	0	0	5.56639	9.88618	FGFR2
Positive Regulation Of Cell-Matrix Adhesion (GO:0001954)	1/43	0.169306	0.254891	0	0	5.56639	9.88618	PTPRJ
Skeletal System Morphogenesis (GO:0048705)	1/43	0.169306	0.254891	0	0	5.56639	9.88618	FGFR2
Energy Derivation By Oxidation Of Organic Compounds (GO:0015980)	1/43	0.169306	0.254891	0	0	5.56639	9.88618	GFPT2
Ephrin Receptor Signaling Pathway (GO:0048013)	1/43	0.169306	0.254891	0	0	5.56639	9.88618	ARHGEF28
Positive Regulation Of miRNA Transcription (GO:1902895)	1/43	0.169306	0.254891	0	0	5.56639	9.88618	TEAD1
Glycolipid Biosynthetic Process (GO:0009247)	1/43	0.169306	0.254891	0	0	5.56639	9.88618	LARGE1
Positive Regulation Of Receptor-Mediated Endocytosis (GO:0048260)	1/43	0.169306	0.254891	0	0	5.56639	9.88618	SERPINE1
Negative Regulation Of BMP Signaling Pathway (GO:0030514)	1/43	0.169306	0.254891	0	0	5.56639	9.88618	FBN1
Regulation Of Cell-Cell Adhesion (GO:0022407)	1/43	0.169306	0.254891	0	0	5.56639	9.88618	DPP4
Proteolysis (GO:0006508)	3/330	0.169607	0.254891	0	0	2.16503	3.84135	DPP4;TLL2;PCSK6
Negative Regulation Of Immune System Process (GO:0002683)	1/44	0.172885	0.256904	0	0	5.43666	9.54203	TSC22D3
Neural Crest Cell Development (GO:0014032)	1/44	0.172885	0.256904	0	0	5.43666	9.54203	SEMA3C
Positive Regulation Of Cytokine-Mediated Signaling Pathway (GO:0001961)	1/44	0.172885	0.256904	0	0	5.43666	9.54203	AXL
Synaptic Vesicle Recycling (GO:0036465)	1/44	0.172885	0.256904	0	0	5.43666	9.54203	DNM1
Mitotic Spindle Assembly (GO:0090307)	1/44	0.172885	0.256904	0	0	5.43666	9.54203	CLASP1
Regulation Of Cell-Substrate Adhesion (GO:0010810)	1/44	0.172885	0.256904	0	0	5.43666	9.54203	FBLN2
Mitotic Nuclear Division (GO:0140014)	1/45	0.17645	0.261712	0	0	5.31283	9.21627	CLASP1
Regulation Of Epidermal Growth Factor Receptor Signaling Pathway (GO:0042058)	1/46	0.179999	0.26549	0	0	5.19451	8.90756	PTPRJ
Regulation Of mRNA Catabolic Process (GO:0061013)	1/46	0.179999	0.26549	0	0	5.19451	8.90756	PRKCA
Positive Regulation Of Blood Vessel Endothelial Cell Migration (GO:0043536)	1/46	0.179999	0.26549	0	0	5.19451	8.90756	PRKCA
Golgi To Plasma Membrane Transport (GO:0006893)	1/47	0.183533	0.269205	0	0	5.08133	8.61468	SPTBN1
Regulation Of Interleukin-2 Production (GO:0032663)	1/47	0.183533	0.269205	0	0	5.08133	8.61468	SPTBN1
Regulation Of Wound Healing (GO:0061041)	1/47	0.183533	0.269205	0	0	5.08133	8.61468	SERPINE1
Regulation Of Intrinsic Apoptotic Signaling Pathway (GO:2001242)	1/48	0.187052	0.273358	0	0	4.97297	8.33652	BCL2L1
Post-Translational Protein Modification (GO:0043687)	1/48	0.187052	0.273358	0	0	4.97297	8.33652	PRKCA
Positive Regulation Of Intracellular Signal Transduction (GO:1902533)	4/525	0.189726	0.276446	0	0	1.81574	3.01808	AKAP13;AXL;PTPRJ;FGFR2
Positive Regulation Of miRNA Metabolic Process (GO:2000630)	1/49	0.190556	0.276446	0	0	4.86912	8.07206	TEAD1
Intrinsic Apoptotic Signaling Pathway In Response To DNA Damage (GO:0008630)	1/49	0.190556	0.276446	0	0	4.86912	8.07206	BCL2L1
Regulation Of Cell Communication (GO:0010646)	1/49	0.190556	0.276446	0	0	4.86912	8.07206	SLC8A1
Axonogenesis (GO:0007409)	2/188	0.193743	0.279468	0	0	2.52535	4.14466	SEMA3C;FGFR2
Regulation Of Epithelial Cell Migration (GO:0010632)	1/50	0.194046	0.279468	0	0	4.76951	7.82038	CLASP1
Regulation Of Interleukin-12 Production (GO:0032655)	1/50	0.194046	0.279468	0	0	4.76951	7.82038	MAST2
Positive Regulation Of Fat Cell Differentiation (GO:0045600)	1/50	0.194046	0.279468	0	0	4.76951	7.82038	ZBTB16
Regulation Of Smoothened Signaling Pathway (GO:0008589)	1/51	0.19752	0.280909	0	0	4.67388	7.58065	FGFR2
Regulation Of Substrate Adhesion-Dependent Cell Spreading (GO:1900024)	1/51	0.19752	0.280909	0	0	4.67388	7.58065	LIMS2
Regulation Of Synapse Assembly (GO:0051963)	1/51	0.19752	0.280909	0	0	4.67388	7.58065	PDLIM5
Positive Regulation Of Protein Localization To Cell Periphery (GO:1904377)	1/51	0.19752	0.280909	0	0	4.67388	7.58065	SPTBN1
Positive Regulation Of Protein Localization To Plasma Membrane (GO:1903078)	1/51	0.19752	0.280909	0	0	4.67388	7.58065	SPTBN1
Receptor Internalization (GO:0031623)	1/51	0.19752	0.280909	0	0	4.67388	7.58065	DNM1
Negative Regulation Of MAP Kinase Activity (GO:0043407)	1/51	0.19752	0.280909	0	0	4.67388	7.58065	PTPRJ
Protein Localization To Membrane (GO:0072657)	2/192	0.199984	0.283295	0	0	2.47168	3.97821	TSPAN5;SPTBN1
Modification-Dependent Protein Catabolic Process (GO:0019941)	2/192	0.199984	0.283295	0	0	2.47168	3.97821	SPSB1;UBE2G1
Regulation Of Protein Localization To Nucleus (GO:1900180)	1/52	0.200979	0.283295	0	0	4.58201	7.35208	CTNNA1
Cardiac Muscle Tissue Development (GO:0048738)	1/52	0.200979	0.283295	0	0	4.58201	7.35208	AKAP13
Sprouting Angiogenesis (GO:0002040)	1/52	0.200979	0.283295	0	0	4.58201	7.35208	ROBO1
Regulation Of Cell Differentiation (GO:0045595)	2/193	0.201549	0.283595	0	0	2.45861	3.93802	CLASP1;FGFR2
Actin Polymerization Or Depolymerization (GO:0008154)	1/53	0.204424	0.285619	0	0	4.49367	7.13396	MICAL2
Cellular Response To Alcohol (GO:0097306)	1/53	0.204424	0.285619	0	0	4.49367	7.13396	CTNNA1
Endosome Organization (GO:0007032)	1/53	0.204424	0.285619	0	0	4.49367	7.13396	DNM1
Mitochondrial Transport (GO:0006839)	1/53	0.204424	0.285619	0	0	4.49367	7.13396	BCL2L1
Regulation Of Exocytosis (GO:0017157)	1/54	0.207854	0.286882	0	0	4.40866	6.92564	CLASP1
Apical Junction Assembly (GO:0043297)	1/54	0.207854	0.286882	0	0	4.40866	6.92564	CTNNA1
Organelle Disassembly (GO:1903008)	1/54	0.207854	0.286882	0	0	4.40866	6.92564	MAP4
Peptidyl-Tyrosine Modification (GO:0018212)	1/54	0.207854	0.286882	0	0	4.40866	6.92564	FGFR2
Positive Regulation Of Leukocyte Chemotaxis (GO:0002690)	1/54	0.207854	0.286882	0	0	4.40866	6.92564	SERPINE1
Protein K63-linked Ubiquitination (GO:0070534)	1/54	0.207854	0.286882	0	0	4.40866	6.92564	UBE2G1
Regulation Of Blood Vessel Endothelial Cell Migration (GO:0043535)	1/54	0.207854	0.286882	0	0	4.40866	6.92564	PRKCA
Positive Regulation Of DNA-templated Transcription Initiation (GO:2000144)	1/56	0.21467	0.295776	0	0	4.24791	6.53606	MITF
Striated Muscle Contraction (GO:0006941)	1/57	0.218057	0.298366	0	0	4.17185	6.35372	SLC8A1
Post-Transcriptional Regulation Of Gene Expression (GO:0010608)	1/57	0.218057	0.298366	0	0	4.17185	6.35372	MSI2
Myeloid Cell Differentiation (GO:0030099)	1/57	0.218057	0.298366	0	0	4.17185	6.35372	ZBTB16
Positive Regulation Of Nucleic Acid-Templated Transcription (GO:1903508)	4/557	0.218153	0.298366	0	0	1.70785	2.6003	ZBTB16;MITF;TEAD1;CREB5
Defense Response To Bacterium (GO:0042742)	2/204	0.218846	0.298366	0	0	2.32343	3.53019	ANXA3;SERPINE1
Regulation Of MAPK Cascade (GO:0043408)	2/204	0.218846	0.298366	0	0	2.32343	3.53019	PTPRJ;FGFR2
Positive Regulation Of Protein Phosphorylation (GO:0001934)	3/377	0.220932	0.298366	0	0	1.88841	2.85131	SLCO3A1;PTPRJ;ITGA5
Peptidyl-Threonine Phosphorylation (GO:0018107)	1/58	0.221429	0.298366	0	0	4.09845	6.17905	PRKCA
Renal System Development (GO:0072001)	1/58	0.221429	0.298366	0	0	4.09845	6.17905	SULF1
Eye Development (GO:0001654)	1/58	0.221429	0.298366	0	0	4.09845	6.17905	FBN1
Glycosaminoglycan Biosynthetic Process (GO:0006024)	1/58	0.221429	0.298366	0	0	4.09845	6.17905	UGDH
Muscle Organ Development (GO:0007517)	1/58	0.221429	0.298366	0	0	4.09845	6.17905	LARGE1
Regulation Of Bone Mineralization (GO:0030500)	1/58	0.221429	0.298366	0	0	4.09845	6.17905	SLC8A1
Regulation Of miRNA Transcription (GO:1902893)	1/59	0.224786	0.30085	0	0	4.02759	6.01159	TEAD1
Heart Morphogenesis (GO:0003007)	1/59	0.224786	0.30085	0	0	4.02759	6.01159	FLRT2
Mitotic Cytokinesis (GO:0000281)	1/59	0.224786	0.30085	0	0	4.02759	6.01159	SPTBN1
Negative Regulation Of Cytokine-Mediated Signaling Pathway (GO:0001960)	1/59	0.224786	0.30085	0	0	4.02759	6.01159	ROBO1
Negative Regulation Of Programmed Cell Death (GO:0043069)	3/381	0.225447	0.301227	0	0	1.86804	2.78277	AXL;FSTL1;BCL2L1
Negative Regulation Of Peptidase Activity (GO:0010466)	1/60	0.22813	0.303791	0	0	3.95912	5.85095	SERPINE1
Positive Regulation Of Phagocytosis (GO:0050766)	1/60	0.22813	0.303791	0	0	3.95912	5.85095	PTPRJ
Negative Regulation Of Intrinsic Apoptotic Signaling Pathway (GO:2001243)	1/61	0.231459	0.306683	0	0	3.89294	5.69675	BCL2L1
Positive Regulation Of Cell Junction Assembly (GO:1901890)	1/61	0.231459	0.306683	0	0	3.89294	5.69675	PTPRJ
Positive Regulation Of Interleukin-8 Production (GO:0032757)	1/61	0.231459	0.306683	0	0	3.89294	5.69675	SERPINE1
Positive Regulation Of Multicellular Organismal Process (GO:0051240)	3/387	0.232253	0.307223	0	0	1.83829	2.68377	ZBTB16;SERPINE1;PRKCA
Regulation Of Embryonic Development (GO:0045995)	1/62	0.234773	0.309015	0	0	3.82893	5.54863	CLASP1
Cell Junction Organization (GO:0034330)	1/62	0.234773	0.309015	0	0	3.82893	5.54863	LIMS2
Glycerophospholipid Metabolic Process (GO:0006650)	1/62	0.234773	0.309015	0	0	3.82893	5.54863	PLA1A
Phosphatidylinositol Metabolic Process (GO:0046488)	1/63	0.238074	0.312325	0	0	3.76698	5.40627	INPP4B
Protein Polymerization (GO:0051258)	1/63	0.238074	0.312325	0	0	3.76698	5.40627	MAP4
Protein N-linked Glycosylation (GO:0006487)	1/64	0.241361	0.316115	0	0	3.707	5.26936	GFPT2
Proteasomal Protein Catabolic Process (GO:0010498)	2/220	0.244219	0.319332	0	0	2.15116	3.03247	SPSB1;UBE2G1
Regulation Of Cell-Matrix Adhesion (GO:0001952)	1/65	0.244633	0.319349	0	0	3.6489	5.13763	CLASP1
Positive Regulation Of Cell Motility (GO:2000147)	2/221	0.24581	0.320359	0	0	2.14123	3.00456	SEMA3C;PRKCA
Negative Regulation Of Endopeptidase Activity (GO:0010951)	1/66	0.247892	0.322544	0	0	3.59258	5.01079	SERPINE1
Activation Of Cysteine-Type Endopeptidase Activity Involved In Apoptotic Process (GO:0006919)	1/67	0.251137	0.325169	0	0	3.53797	4.88861	ROBO1
Peptidyl-Tyrosine Phosphorylation (GO:0018108)	1/67	0.251137	0.325169	0	0	3.53797	4.88861	FGFR2
Extrinsic Apoptotic Signaling Pathway (GO:0097191)	1/67	0.251137	0.325169	0	0	3.53797	4.88861	BCL2L1
Cellular Response To Oxygen-Containing Compound (GO:1901701)	3/406	0.254046	0.327751	0	0	1.74992	2.39781	CPEB1;AXL;SERPINE1
B Cell Differentiation (GO:0030183)	1/68	0.254368	0.327751	0	0	3.48499	4.77086	PTPRJ
Cell-Cell Junction Organization (GO:0045216)	1/68	0.254368	0.327751	0	0	3.48499	4.77086	LIMS2
Regulation Of Cell Growth (GO:0001558)	2/227	0.255366	0.328505	0	0	2.08349	2.84409	PTPRJ;TEAD1
Apoptotic Process (GO:0006915)	2/228	0.25696	0.3287	0	0	2.07417	2.81845	ZBTB16;BCL2L1
Cellular Response To Lipid (GO:0071396)	2/228	0.25696	0.3287	0	0	2.07417	2.81845	AXL;SERPINE1
Cilium Organization (GO:0044782)	2/228	0.25696	0.3287	0	0	2.07417	2.81845	ABLIM1;MAP4
Regulation Of Endopeptidase Activity (GO:0052548)	1/69	0.257585	0.3287	0	0	3.43356	4.65731	SERPINE1
Regulation Of Heart Contraction (GO:0008016)	1/69	0.257585	0.3287	0	0	3.43356	4.65731	SLC8A1
Protein K48-linked Ubiquitination (GO:0070936)	1/70	0.260788	0.331723	0	0	3.38363	4.54776	UBE2G1
Regulation Of Notch Signaling Pathway (GO:0008593)	1/70	0.260788	0.331723	0	0	3.38363	4.54776	TSPAN5
Negative Regulation Of Supramolecular Fiber Organization (GO:1902904)	1/71	0.263978	0.334176	0	0	3.33513	4.44202	CLASP1
Synapse Assembly (GO:0007416)	1/71	0.263978	0.334176	0	0	3.33513	4.44202	SDK1
Negative Regulation Of Cellular Response To Growth Factor Stimulus (GO:0090288)	1/71	0.263978	0.334176	0	0	3.33513	4.44202	SULF1
Positive Regulation Of Developmental Process (GO:0051094)	2/233	0.264931	0.334849	0	0	2.02876	2.69477	ZBTB16;CLASP1
Cellular Response To Hypoxia (GO:0071456)	1/72	0.267154	0.336056	0	0	3.28799	4.33991	CPEB1
Plasma Membrane Organization (GO:0007009)	1/72	0.267154	0.336056	0	0	3.28799	4.33991	SPTBN1
Negative Regulation Of Cell Adhesion (GO:0007162)	1/72	0.267154	0.336056	0	0	3.28799	4.33991	SERPINE1
Organelle Organization (GO:0006996)	3/418	0.267964	0.336543	0	0	1.69827	2.23646	MAST2;MICAL2;CLASP1
Cellular Response To Decreased Oxygen Levels (GO:0036294)	1/73	0.270317	0.338428	0	0	3.24216	4.24126	CPEB1
Positive Regulation Of Secretion By Cell (GO:1903532)	1/73	0.270317	0.338428	0	0	3.24216	4.24126	CLASP1
Regulation Of mRNA Stability (GO:0043488)	1/74	0.273466	0.341296	0	0	3.19758	4.14591	PRKCA
Gland Development (GO:0048732)	1/74	0.273466	0.341296	0	0	3.19758	4.14591	FGFR2
Regulation Of Fat Cell Differentiation (GO:0045598)	1/75	0.276602	0.343591	0	0	3.15421	4.05372	ZBTB16
Regulation Of Stress Fiber Assembly (GO:0051492)	1/75	0.276602	0.343591	0	0	3.15421	4.05372	CLASP1
Defense Response To Gram-negative Bacterium (GO:0050829)	1/75	0.276602	0.343591	0	0	3.15421	4.05372	SERPINE1
Regulation Of Ras Protein Signal Transduction (GO:0046578)	1/76	0.279724	0.346928	0	0	3.112	3.96454	ARHGEF28
Cell Morphogenesis Involved In Neuron Differentiation (GO:0048667)	1/77	0.282833	0.348069	0	0	3.0709	3.87823	FGFR2
Positive Regulation Of Endothelial Cell Proliferation (GO:0001938)	1/77	0.282833	0.348069	0	0	3.0709	3.87823	PRKCA
Sphingolipid Biosynthetic Process (GO:0030148)	1/77	0.282833	0.348069	0	0	3.0709	3.87823	LARGE1
Monoatomic Cation Homeostasis (GO:0055080)	1/77	0.282833	0.348069	0	0	3.0709	3.87823	SLC8A1
Negative Regulation Of Blood Vessel Morphogenesis (GO:2000181)	1/77	0.282833	0.348069	0	0	3.0709	3.87823	SULF1
Positive Regulation Of DNA-binding Transcription Factor Activity (GO:0051091)	2/246	0.285655	0.350792	0	0	1.9194	2.40495	SLCO3A1;ANXA3
Positive Regulation Of Tumor Necrosis Factor Production (GO:0032760)	1/78	0.285929	0.350792	0	0	3.03086	3.79468	PTPRJ
Positive Regulation Of Protein Localization To Membrane (GO:1905477)	1/79	0.289011	0.354028	0	0	2.99186	3.71376	SPTBN1
Regulation Of Cytokinesis (GO:0032465)	1/80	0.292081	0.356141	0	0	2.95383	3.63536	BCL2L1
Calcium Ion Transmembrane Transport (GO:0070588)	1/80	0.292081	0.356141	0	0	2.95383	3.63536	SLC8A1
Glycoprotein Biosynthetic Process (GO:0009101)	1/80	0.292081	0.356141	0	0	2.95383	3.63536	LARGE1
Regulation Of Interleukin-8 Production (GO:0032677)	1/81	0.295137	0.357674	0	0	2.91676	3.55937	SERPINE1
Cytoskeleton-Dependent Cytokinesis (GO:0061640)	1/81	0.295137	0.357674	0	0	2.91676	3.55937	SPTBN1
Spindle Assembly (GO:0051225)	1/81	0.295137	0.357674	0	0	2.91676	3.55937	CLASP1
Positive Regulation Of Growth (GO:0045927)	1/81	0.295137	0.357674	0	0	2.91676	3.55937	TEAD1
Sodium Ion Transmembrane Transport (GO:0035725)	1/82	0.29818	0.359717	0	0	2.88061	3.4857	SLC8A1
Positive Regulation Of Tumor Necrosis Factor Superfamily Cytokine Production (GO:1903557)	1/82	0.29818	0.359717	0	0	2.88061	3.4857	PTPRJ
Negative Regulation Of Apoptotic Signaling Pathway (GO:2001234)	1/82	0.29818	0.359717	0	0	2.88061	3.4857	BCL2L1
Regulation Of Epithelial To Mesenchymal Transition (GO:0010717)	1/83	0.30121	0.361726	0	0	2.84534	3.41425	CLASP1
Calcium Ion Transmembrane Import Into Cytosol (GO:0097553)	1/83	0.30121	0.361726	0	0	2.84534	3.41425	SLC8A1
Vascular Transport (GO:0010232)	1/83	0.30121	0.361726	0	0	2.84534	3.41425	SLCO3A1
Regulation Of Osteoblast Differentiation (GO:0045667)	1/85	0.307232	0.366191	0	0	2.77731	3.27765	FGFR2
Response To Interleukin-1 (GO:0070555)	1/85	0.307232	0.366191	0	0	2.77731	3.27765	PRKCA
Positive Regulation Of Canonical Wnt Signaling Pathway (GO:0090263)	1/85	0.307232	0.366191	0	0	2.77731	3.27765	FGFR2
Epidermis Development (GO:0008544)	1/85	0.307232	0.366191	0	0	2.77731	3.27765	FGFR2
Transport Across Blood-Brain Barrier (GO:0150104)	1/85	0.307232	0.366191	0	0	2.77731	3.27765	SLCO3A1
Negative Regulation Of Protein Kinase Activity (GO:0006469)	1/88	0.316169	0.376279	0	0	2.68114	3.08727	SLC8A1
Negative Regulation Of Signal Transduction (GO:0009968)	2/267	0.319003	0.378096	0	0	1.76541	2.01707	PTPRJ;SULF1
Organic Anion Transport (GO:0015711)	1/89	0.319122	0.378096	0	0	2.65053	3.02739	SLCO3A1
Sodium Ion Transport (GO:0006814)	1/89	0.319122	0.378096	0	0	2.65053	3.02739	SLC8A1
Regulation Of Epithelial Cell Proliferation (GO:0050678)	1/91	0.324991	0.383336	0	0	2.59137	2.91259	FGFR2
Positive Regulation Of MAP Kinase Activity (GO:0043406)	1/91	0.324991	0.383336	0	0	2.59137	2.91259	ROBO1
Regulation Of RNA Metabolic Process (GO:0051252)	1/91	0.324991	0.383336	0	0	2.59137	2.91259	MITF
B Cell Activation (GO:0042113)	1/92	0.327907	0.386202	0	0	2.56277	2.85755	PTPRJ
Positive Regulation Of Cellular Component Biogenesis (GO:0044089)	1/93	0.330811	0.389045	0	0	2.53478	2.804	PRKCA
Vesicle Organization (GO:0016050)	1/94	0.333701	0.391287	0	0	2.5074	2.75189	DNM1
Muscle Contraction (GO:0006936)	1/94	0.333701	0.391287	0	0	2.5074	2.75189	SLC8A1
T Cell Receptor Signaling Pathway (GO:0050852)	1/95	0.33658	0.392924	0	0	2.4806	2.70117	PTPRJ
Cell Junction Assembly (GO:0034329)	1/95	0.33658	0.392924	0	0	2.4806	2.70117	SDK1
Positive Regulation Of Transmembrane Receptor Protein Serine/Threonine Kinase Signaling Pathway (GO:0090100)	1/95	0.33658	0.392924	0	0	2.4806	2.70117	SULF1
Regulation Of Protein Metabolic Process (GO:0051246)	1/96	0.339446	0.395689	0	0	2.45437	2.65179	MSI2
Phosphatidylinositol Biosynthetic Process (GO:0006661)	1/98	0.345142	0.40174	0	0	2.40352	2.55686	INPP4B
Axon Development (GO:0061564)	1/99	0.347972	0.404441	0	0	2.37887	2.51122	FGFR2
Activation Of GTPase Activity (GO:0090630)	1/102	0.356389	0.413016	0	0	2.30786	2.3811	TBC1D4
Calcium Ion Homeostasis (GO:0055074)	1/102	0.356389	0.413016	0	0	2.30786	2.3811	SLC8A1
Inorganic Cation Import Across Plasma Membrane (GO:0098659)	1/103	0.359171	0.415634	0	0	2.28512	2.33987	SLC8A1
Positive Regulation Of Inflammatory Response (GO:0050729)	1/104	0.361941	0.418231	0	0	2.26282	2.29965	SERPINE1
Protein Phosphorylation (GO:0006468)	3/500	0.364424	0.419588	0	0	1.41211	1.42544	MAST2;PRKCA;FGFR2
Intrinsic Apoptotic Signaling Pathway (GO:0097193)	1/105	0.364699	0.419588	0	0	2.24095	2.26041	BCL2L1
Negative Regulation Of MAPK Cascade (GO:0043409)	1/105	0.364699	0.419588	0	0	2.24095	2.26041	PTPRJ
Protein Modification Process (GO:0036211)	4/711	0.365823	0.419847	0	0	1.32521	1.33264	MAST2;PTPRJ;PRKCA;LARGE1
Regulation Of Intracellular Signal Transduction (GO:1902531)	2/297	0.36598	0.419847	0	0	1.58345	1.59165	AKAP13;ARHGEF28
Positive Regulation Of Cell Growth (GO:0030307)	1/106	0.367445	0.42092	0	0	2.2195	2.22212	TEAD1
Negative Regulation Of Translation (GO:0017148)	1/107	0.370179	0.422834	0	0	2.19845	2.18475	CPEB1
Monoatomic Ion Transport (GO:0006811)	1/107	0.370179	0.422834	0	0	2.19845	2.18475	SLC8A1
Glycerophospholipid Biosynthetic Process (GO:0046474)	1/108	0.372902	0.425333	0	0	2.17779	2.14826	INPP4B
Positive Regulation Of Cysteine-Type Endopeptidase Activity Involved In Apoptotic Process (GO:0043280)	1/109	0.375613	0.4272	0	0	2.15752	2.11263	ROBO1
Extracellular Structure Organization (GO:0043062)	1/109	0.375613	0.4272	0	0	2.15752	2.11263	COL8A1
Adenylate Cyclase-Activating G Protein-Coupled Receptor Signaling Pathway (GO:0007189)	1/110	0.378313	0.429031	0	0	2.13761	2.07783	ADGRD1
External Encapsulating Structure Organization (GO:0045229)	1/110	0.378313	0.429031	0	0	2.13761	2.07783	COL8A1
T Cell Activation (GO:0042110)	1/111	0.381001	0.429031	0	0	2.11807	2.04384	DPP4
Negative Regulation Of Transmembrane Receptor Protein Serine/Threonine Kinase Signaling Pathway (GO:0090101)	1/111	0.381001	0.429031	0	0	2.11807	2.04384	ASPN
Regulation Of Transforming Growth Factor Beta Receptor Signaling Pathway (GO:0017015)	1/111	0.381001	0.429031	0	0	2.11807	2.04384	ASPN
Mitotic Cell Cycle Phase Transition (GO:0044772)	1/111	0.381001	0.429031	0	0	2.11807	2.04384	CLASP1
Mitotic Sister Chromatid Segregation (GO:0000070)	1/111	0.381001	0.429031	0	0	2.11807	2.04384	CLASP1
Cellular Response To Cytokine Stimulus (GO:0071345)	2/308	0.382917	0.430217	0	0	1.52568	1.46455	AXL;PTPRJ
Calcium Ion Transport (GO:0006816)	1/112	0.383677	0.430217	0	0	2.09889	2.01064	SLC8A1
Regulation Of Protein Serine/Threonine Kinase Activity (GO:0071900)	1/112	0.383677	0.430217	0	0	2.09889	2.01064	SLC8A1
Regulation Of Cytoskeleton Organization (GO:0051493)	1/114	0.388996	0.435566	0	0	2.06153	1.94647	CLASP1
Positive Regulation Of Protein Serine/Threonine Kinase Activity (GO:0071902)	1/117	0.396889	0.443779	0	0	2.00791	1.85551	ROBO1
Positive Regulation Of Cell Projection Organization (GO:0031346)	1/118	0.399498	0.445628	0	0	1.99065	1.82651	ROBO1
Proteasome-Mediated Ubiquitin-Dependent Protein Catabolic Process (GO:0043161)	2/319	0.399664	0.445628	0	0	1.47191	1.34993	SPSB1;UBE2G1
Organonitrogen Compound Biosynthetic Process (GO:1901566)	1/123	0.412375	0.458775	0	0	1.90858	1.69067	LARGE1
Protein-Containing Complex Assembly (GO:0065003)	2/328	0.413213	0.458775	0	0	1.43062	1.26437	MITF;TEAD1
Negative Regulation Of Growth (GO:0045926)	1/124	0.414917	0.458775	0	0	1.89297	1.6652	PTPRJ
Neuron Projection Guidance (GO:0097485)	1/124	0.414917	0.458775	0	0	1.89297	1.6652	SEMA3C
Positive Regulation Of Defense Response (GO:0031349)	1/124	0.414917	0.458775	0	0	1.89297	1.6652	SERPINE1
Protein Dephosphorylation (GO:0006470)	1/124	0.414917	0.458775	0	0	1.89297	1.6652	PTPRJ
Regulation Of Mitotic Cell Cycle (GO:0007346)	1/125	0.417449	0.460294	0	0	1.87761	1.64027	PRKCA
Negative Regulation Of Cell Growth (GO:0030308)	1/125	0.417449	0.460294	0	0	1.87761	1.64027	PTPRJ
Regulation Of Response To External Stimulus (GO:0032101)	1/127	0.42248	0.464552	0	0	1.84762	1.59193	CD55
Regulation Of Tumor Necrosis Factor Production (GO:0032680)	1/127	0.42248	0.464552	0	0	1.84762	1.59193	PTPRJ
Golgi Organization (GO:0007030)	1/130	0.429945	0.471457	0	0	1.80438	1.52307	CLASP1
Regulation Of Cell Cycle Process (GO:0010564)	1/130	0.429945	0.471457	0	0	1.80438	1.52307	BCL2L1
Synapse Organization (GO:0050808)	1/131	0.432412	0.473509	0	0	1.79041	1.50103	SDK1
Plasma Membrane Bounded Cell Projection Organization (GO:0120036)	1/132	0.434869	0.475545	0	0	1.77665	1.47943	MAP4
Antigen Receptor-Mediated Signaling Pathway (GO:0050851)	1/134	0.439751	0.480223	0	0	1.74976	1.43751	PTPRJ
Positive Regulation Of DNA-templated Transcription (GO:0045893)	6/1243	0.446328	0.486737	0	0	1.1324	0.913505	ZBTB16;MICAL2;MITF;TEAD1;FGFR2;CREB5
Intracellular Calcium Ion Homeostasis (GO:0006874)	1/139	0.451774	0.492001	0	0	1.68593	1.3396	SLC8A1
Positive Regulation Of Macromolecule Metabolic Process (GO:0010604)	2/364	0.465841	0.506626	0	0	1.28598	0.982371	MITF;ROBO1
Negative Regulation Of Response To External Stimulus (GO:0032102)	1/146	0.468179	0.50778	0	0	1.60398	1.21726	SERPINE1
Neuron Projection Morphogenesis (GO:0048812)	1/146	0.468179	0.50778	0	0	1.60398	1.21726	FGFR2
Ubiquitin-Dependent Protein Catabolic Process (GO:0006511)	2/367	0.470105	0.50889	0	0	1.27521	0.96253	SPSB1;UBE2G1
Dephosphorylation (GO:0016311)	1/147	0.470483	0.50889	0	0	1.59291	1.20105	PTPRJ
Defense Response To Symbiont (GO:0140546)	1/148	0.472777	0.510676	0	0	1.58199	1.18512	BCL2L1
Axon Guidance (GO:0007411)	1/149	0.475061	0.512447	0	0	1.57122	1.16948	SEMA3C
Cellular Response To Organic Cyclic Compound (GO:0071407)	1/152	0.481854	0.518368	0	0	1.53977	1.12421	CTNNA1
Positive Regulation Of NF-kappaB Transcription Factor Activity (GO:0051092)	1/152	0.481854	0.518368	0	0	1.53977	1.12421	SLCO3A1
Epithelium Development (GO:0060429)	1/154	0.486335	0.522481	0	0	1.51949	1.09534	FGFR2
Cellular Response To Growth Factor Stimulus (GO:0071363)	1/155	0.488561	0.524164	0	0	1.50955	1.08128	PDE8A
Protein Autophosphorylation (GO:0046777)	1/162	0.503877	0.539142	0	0	1.44341	0.989343	FGFR2
Mitochondrion Organization (GO:0007005)	1/162	0.503877	0.539142	0	0	1.44341	0.989343	BCL2L1
Adenylate Cyclase-Modulating G Protein-Coupled Receptor Signaling Pathway (GO:0007188)	1/163	0.506028	0.540715	0	0	1.43442	0.977076	ADGRD1
Regulation Of Cytokine Production (GO:0001817)	1/167	0.514539	0.549072	0	0	1.39957	0.929995	MAST2
Neuron Differentiation (GO:0030182)	1/173	0.527035	0.561652	0	0	1.35034	0.864879	UGDH
Regulation Of Neuron Projection Development (GO:0010975)	1/174	0.529086	0.563084	0	0	1.34247	0.85462	PDLIM5
Vesicle-Mediated Transport (GO:0016192)	2/411	0.530258	0.563577	0	0	1.13546	0.720328	TBC1D4;DNM1
Positive Regulation Of I-kappaB kinase/NF-kappaB Signaling (GO:0043123)	1/175	0.531129	0.563748	0	0	1.33469	0.844523	AKAP13
Negative Regulation Of Cytokine Production (GO:0001818)	1/178	0.537205	0.569437	0	0	1.31186	0.815161	AXL
Macromolecule Biosynthetic Process (GO:0009059)	1/183	0.547158	0.579216	0	0	1.2755	0.769149	LARGE1
Negative Regulation Of Macromolecule Metabolic Process (GO:0010605)	1/186	0.553029	0.584398	0	0	1.25463	0.743172	ROBO1
Phosphorylation (GO:0016310)	2/429	0.553524	0.584398	0	0	1.0866	0.642668	MAST2;PRKCA
Defense Response To Virus (GO:0051607)	1/189	0.558824	0.589211	0	0	1.23442	0.718334	BCL2L1
Protein Ubiquitination (GO:0016567)	2/434	0.559843	0.589504	0	0	1.07374	0.622877	SPSB1;UBE2G1
Intracellular Monoatomic Cation Homeostasis (GO:0030003)	1/190	0.560739	0.589666	0	0	1.22782	0.710296	SLC8A1
Neuron Projection Development (GO:0031175)	1/192	0.564545	0.592884	0	0	1.21484	0.69457	MAP4
DNA-templated Transcription (GO:0006351)	1/199	0.57761	0.605694	0	0	1.17148	0.642974	PDE10A
Positive Regulation Of Transcription By RNA Polymerase II (GO:0045944)	4/938	0.578266	0.605694	0	0	0.991278	0.542944	MICAL2;MITF;TEAD1;FGFR2
Regulation Of Translation (GO:0006417)	1/202	0.58309	0.609943	0	0	1.15382	0.622386	MSI2
Regulation Of Apoptotic Process (GO:0042981)	3/705	0.58842	0.61471	0	0	0.989188	0.52458	AXL;FSTL1;BCL2L1
Regulation Of Canonical Wnt Signaling Pathway (GO:0060828)	1/207	0.592067	0.616898	0	0	1.12553	0.589929	FGFR2
Negative Regulation Of Cell Differentiation (GO:0045596)	1/207	0.592067	0.616898	0	0	1.12553	0.589929	ZBTB16
Positive Regulation Of Gene Expression (GO:0010628)	2/480	0.615019	0.639974	0	0	0.968121	0.470606	MITF;ROBO1
Positive Regulation Of Cell Population Proliferation (GO:0008284)	2/483	0.61843	0.642683	0	0	0.961934	0.462278	DPP4;FGFR2
Positive Regulation Of Protein Modification Process (GO:0031401)	1/225	0.622833	0.646413	0	0	1.03414	0.489641	SLCO3A1
Protein Polyubiquitination (GO:0000209)	1/226	0.624473	0.64727	0	0	1.02949	0.484733	UBE2G1
Negative Regulation Of Multicellular Organismal Process (GO:0051241)	1/231	0.632569	0.654808	0	0	1.00685	0.461105	ROBO1
Regulation Of I-kappaB kinase/NF-kappaB Signaling (GO:0043122)	1/232	0.634168	0.655609	0	0	1.00244	0.456555	AKAP13
Positive Regulation Of GTPase Activity (GO:0043547)	1/234	0.637344	0.658037	0	0	0.993739	0.447626	TBC1D4
Negative Regulation Of Transcription By RNA Polymerase II (GO:0000122)	3/763	0.642316	0.662311	0	0	0.910938	0.403249	ZBTB16;MITF;FGFR2
Regulation Of Cell Population Proliferation (GO:0042127)	3/766	0.644968	0.664183	0	0	0.907215	0.397863	DPP4;PTPRJ;FGFR2
Regulation Of Inflammatory Response (GO:0050727)	1/240	0.64671	0.665116	0	0	0.968496	0.422126	SERPINE1
Cilium Assembly (GO:0060271)	1/243	0.651303	0.668974	0	0	0.956344	0.410062	ABLIM1
Cytokine-Mediated Signaling Pathway (GO:0019221)	1/257	0.671968	0.689309	0	0	0.903401	0.359142	PTPRJ
Regulation Of Protein Phosphorylation (GO:0001932)	1/265	0.683229	0.699957	0	0	0.875668	0.333565	SLCO3A1
Plasma Membrane Bounded Cell Projection Assembly (GO:0120031)	1/275	0.696768	0.712909	0	0	0.84328	0.30468	ABLIM1
Monoatomic Cation Transmembrane Transport (GO:0098655)	1/281	0.704615	0.720012	0	0	0.824958	0.28882	SLC8A1
Positive Regulation Of Cell Differentiation (GO:0045597)	1/283	0.707186	0.721711	0	0	0.819024	0.28376	ZBTB16
Inorganic Cation Transmembrane Transport (GO:0098662)	1/284	0.708464	0.722088	0	0	0.816088	0.28127	SLC8A1
Regulation Of Gene Expression (GO:0010468)	4/1127	0.721261	0.73419	0	0	0.816237	0.266709	MITF;UTY;SLC8A1;ROBO1
Gene Expression (GO:0010467)	1/296	0.723367	0.735392	0	0	0.782413	0.253376	TSPAN5
Regulation Of Cell Cycle (GO:0051726)	1/298	0.725776	0.736899	0	0	0.777065	0.24906	FGFR2
Protein Transport (GO:0015031)	1/313	0.743199	0.753626	0	0	0.73914	0.219371	SPTBN1
Organelle Assembly (GO:0070925)	1/322	0.753122	0.762716	0	0	0.718087	0.203598	ABLIM1
Negative Regulation Of Gene Expression (GO:0010629)	1/336	0.76781	0.776602	0	0	0.687586	0.181669	ROBO1
Regulation Of Transcription By RNA Polymerase II (GO:0006357)	7/2028	0.78157	0.789514	0	0	0.784491	0.193339	ZBTB16;EBF1;MICAL2;MITF;TEAD1;FGFR2;CREB5
Protein Modification By Small Protein Conjugation (GO:0032446)	1/364	0.794644	0.801703	0	0	0.633641	0.145649	SPSB1
Negative Regulation Of Cell Population Proliferation (GO:0008285)	1/379	0.807734	0.813876	0	0	0.60803	0.129828	PTPRJ
DNA Damage Response (GO:0006974)	1/384	0.811911	0.81705	0	0	0.599939	0.125006	BCL2L1
Negative Regulation Of DNA-templated Transcription (GO:0045892)	3/1025	0.823783	0.827948	0	0	0.668144	0.129519	ZBTB16;MITF;FGFR2
Regulation Of Nucleic Acid-Templated Transcription (GO:1903506)	1/452	0.860561	0.863821	0	0	0.507708	0.076243	MITF
Negative Regulation Of Nucleic Acid-Templated Transcription (GO:1903507)	1/456	0.862999	0.865175	0	0	0.503142	0.0741339	ZBTB16
Negative Regulation Of Cellular Process (GO:0048523)	1/537	0.904221	0.905359	0	0	0.425329	0.042823	PTPRJ
Regulation Of DNA-templated Transcription (GO:0006355)	5/1922	0.925362	0.925362	0	0	0.579513	0.044953	ZBTB16;EBF1;MITF;TEAD1;CREB5
