# Supplementary material for: Cardiorenal heart failure with preserved ejection fraction is caused by a reversible rise of mineralocorticoid-induced fibroblast subtypes
Source: Research Square preprint supplement (doi:10.21203/rs.3.rs-7039115/v1), 2025-07-14
Supplement: Supplementary file 8 [file 4d7b05c64288a576743e4150.xlsx]

## Sheet: all.markers_wilcox_downsaple
	p_val	avg_log2FC	pct.1	pct.2	p_val_adj	cluster	Top 5 Markers
Ttn	0	5.78738	0.996	0.03	0	0	0(CM_0): Ttn, Rbm20, Fhod3, Ryr2, Pde4dip
Rbm20	0	5.96586	0.989	0.023	0	0	1(EC-cap): Flt1, Cyyr1, Adgrl4, Plcb1, Ptprb
Fhod3	0	5.87289	0.984	0.02	0	0	2(FB): Pcdh9, Bicc1, Abca8a, Gpc6, Kcnt2
Ryr2	0	6.09413	0.992	0.029	0	0	3(PER): Trpc3, Pdgfrb, Pde8b, Ano1, Notch3
Pde4dip	0	5.14492	0.991	0.029	0	0	4(MΦ): Slc9a9, Mrc1, Mctp1, Arhgap15, F13a1
Fhl2	0	6.00598	0.984	0.024	0	0	5(EC-art): St6galnac3, Ldb2, Vegfc, Mecom, Rasgrf2
Palld	0	5.5861	0.986	0.03	0	0	6(EC-end): Tmem108, Chrm3, Npr3, Cgnl1, Cdh11
Pde4d	0	5.56617	0.988	0.033	0	0	7(SMC): Myh11, Dgkb, Kcnab1, Mrvi1, Mylk
Tnni3k	0	5.89694	0.97	0.017	0	0	8(CM_1): Tnnt2, Myh6, Myl3, Myl2, mt-Co1
Trdn	0	5.98031	0.971	0.018	0	0	9(EC-lym): Reln, Mmrn1, Flt4, Wdr17, Pard6g
Ldb3	0	5.34592	0.979	0.026	0	0	10(CYC): Diaph3, Rad51b, Top2a, Mki67, Knl1
Tnnt2	0	4.06176	0.977	0.028	0	0	11(CM_2): Fbn2, Slit3, Ephb1, Gm35041, Etv1
Esrrg	0	5.35141	0.975	0.031	0	0	12(BC): Bank1, Aff3, Dock2, Prkcb, Pax5
Pln	0	4.67153	0.972	0.028	0	0	13(SC): Csmd1, Cadm2, Slc35f1, Adam23, Nkain2
Nexn	0	5.20859	0.97	0.027	0	0	14(TC): Skap1, Ptprc, Gm2682, Ikzf1, Grap2
Mlip	0	5.9177	0.958	0.017	0	0
Fgf13	0	5.96351	0.964	0.024	0	0
Ctnna3	0	4.25984	0.988	0.049	0	0
Actn2	0	5.62443	0.956	0.019	0	0
Atp2a2	0	4.94797	0.98	0.05	0	0
Rcan2	0	4.22775	0.971	0.044	0	0
Cdh2	0	5.46941	0.957	0.036	0	0
Dmd	0	4.71485	0.97	0.049	0	0
Ank3	0	4.28211	0.954	0.035	0	0
Obscn	0	5.09217	0.93	0.018	0	0
Kcnn2	0	5.67547	0.926	0.015	0	0
Cpeb3	0	5.22619	0.953	0.042	0	0
Sox6	0	4.2657	0.949	0.04	0	0
Ccdc141	0	4.78029	0.949	0.041	0	0
Sorbs2	0	3.91164	0.974	0.067	0	0
Txlnb	0	5.48244	0.923	0.016	0	0
Corin	0	5.43421	0.925	0.019	0	0
Pcdh7	0	4.70633	0.983	0.08	0	0
Chrm2	0	5.43904	0.919	0.017	0	0
Hs3st5	0	6.10222	0.912	0.012	0	0
Erbb4	0	4.76843	0.917	0.019	0	0
Myocd	0	5.16137	0.925	0.027	0	0
Myh6	0	4.29883	0.985	0.093	0	0
Ivns1abp	0	4.09672	0.936	0.048	0	0
Akap6	0	4.12553	0.964	0.079	0	0
Cacnb2	0	3.71663	0.969	0.087	0	0
Nav2	0	4.28697	0.907	0.031	0	0
Cacna1c	0	4.76554	0.992	0.122	0	0
Tacc2	0	4.14772	0.939	0.073	0	0
Acacb	0	4.8323	0.887	0.024	0	0
Nebl	0	3.62733	0.891	0.032	0	0
Rbm24	0	4.77981	0.877	0.021	0	0
Thrb	0	3.9435	0.933	0.078	0	0
Ppargc1a	0	6.05832	0.865	0.012	0	0
Kbtbd12	0	5.95757	0.864	0.011	0	0
Pde4b	0	3.92348	0.958	0.109	0	0
Gm20619	0	6.29834	0.857	0.008	0	0
Ckmt2	0	4.92523	0.87	0.022	0	0
Grm1	0	6.38405	0.855	0.013	0	0
Kcnd2	0	6.36498	0.853	0.013	0	0
Art1	0	4.91076	0.854	0.015	0	0
Ppara	0	6.0374	0.844	0.01	0	0
Filip1l	0	3.65031	0.961	0.128	0	0
Vegfa	0	4.05757	0.852	0.02	0	0
Fgf1	0	4.32246	0.86	0.032	0	0
Ppip5k2	0	4.36344	0.86	0.033	0	0
Slc25a13	0	5.99602	0.838	0.011	0	0
Lmo7	0	3.38096	0.971	0.144	0	0
Mylk3	0	5.22316	0.838	0.013	0	0
Lmod2	0	5.77627	0.833	0.011	0	0
Cmya5	0	5.35334	0.833	0.016	0	0
Prune2	0	4.75534	0.849	0.034	0	0
Mybpc3	0	3.89601	0.844	0.03	0	0
Mast2	0	3.34611	0.918	0.105	0	0
Synpo2	0	3.16782	0.887	0.077	0	0
Ppp1r14c	0	5.52198	0.823	0.013	0	0
Tbc1d4	0	3.37376	0.897	0.089	0	0
Gm30382	0	5.46848	0.821	0.014	0	0
Scn5a	0	4.94887	0.823	0.016	0	0
Nckap5	0	3.12808	0.932	0.126	0	0
Rbfox1	0	2.85976	0.884	0.078	0	0
Speg	0	4.55576	0.825	0.024	0	0
Kcnj3	0	5.70916	0.812	0.012	0	0
Adk	0	3.284	0.95	0.15	0	0
Jph2	0	3.58675	0.864	0.066	0	0
Gramd1b	0	4.70822	0.822	0.025	0	0
Mypn	0	5.75319	0.805	0.01	0	0
Ppargc1b	0	3.67259	0.853	0.059	0	0
Pkp2	0	5.30068	0.806	0.013	0	0
Ank	0	3.86311	0.856	0.064	0	0
Coro6	0	3.69153	0.821	0.029	0	0
Grb14	0	5.12002	0.811	0.02	0	0
Acyp2	0	3.10757	0.922	0.138	0	0
Pip5k1b	0	3.78852	0.825	0.041	0	0
Trim55	0	5.68033	0.792	0.01	0	0
Casz1	0	3.30094	0.85	0.068	0	0
Ralgapa2	0	2.66779	0.946	0.164	0	0
Dtna	0	4.32587	0.808	0.027	0	0
Ogdh	0	3.17581	0.887	0.107	0	0
Tecrl	0	5.80487	0.788	0.01	0	0
Mitf	0	2.47953	0.901	0.123	0	0
Kcnd3	0	5.73632	0.788	0.011	0	0
Ppp1r12b	0	2.89758	0.952	0.175	0	0
Kcng2	0	5.508	0.783	0.011	0	0
Usp13	0	5.62112	0.783	0.012	0	0
Limch1	0	2.67517	0.962	0.192	0	0
Acsl1	0	4.02197	0.804	0.037	0	0
Smtn	0	3.12386	0.821	0.054	0	0
Myoz2	0	5.2414	0.778	0.015	0	0
Dpf3	0	3.98139	0.8	0.037	0	0
Magi2	0	3.28723	0.965	0.203	0	0
Slc8a1	0	3.68025	0.987	0.225	0	0
Shroom3	0	5.16693	0.776	0.017	0	0
Ppp1r3a	0	5.77063	0.767	0.01	0	0
Trabd2b	0	3.5503	0.814	0.06	0	0
Myo18b	0	5.03523	0.764	0.012	0	0
Mhrt	0	5.89	0.763	0.011	0	0
Oxct1	0	3.0886	0.848	0.097	0	0
Lrrc2	0	5.51159	0.76	0.01	0	0
Asb2	0	4.46722	0.772	0.022	0	0
Asb14	0	5.33316	0.759	0.009	0	0
Prdm16	0	3.46367	0.785	0.037	0	0
Tmem117	0	5.71002	0.758	0.01	0	0
D830005E20Rik	0	6.06359	0.76	0.013	0	0
Gm31251	0	4.8945	0.762	0.018	0	0
Myh7	0	5.83763	0.748	0.008	0	0
Myh7b	0	5.36353	0.747	0.01	0	0
Camta1	0	2.60678	0.893	0.156	0	0
Alpk3	0	5.13691	0.748	0.011	0	0
Larp1b	0	4.02418	0.773	0.037	0	0
Nfyc	0	2.98539	0.828	0.094	0	0
Garem1	0	3.69665	0.787	0.053	0	0
Chpt1	0	4.48238	0.76	0.028	0	0
Nrap	0	5.16317	0.743	0.013	0	0
Clasp1	0	2.73352	0.896	0.167	0	0
Pygb	0	4.449	0.761	0.032	0	0
Pde1c	0	4.02396	0.766	0.037	0	0
Mpc1	0	3.61721	0.78	0.051	0	0
Fign	0	4.02086	0.748	0.024	0	0
Xirp2	0	5.37561	0.736	0.012	0	0
Sorbs1	0	3.19638	0.986	0.262	0	0
Smyd1	0	5.22854	0.733	0.011	0	0
Kcnq1	0	4.19502	0.752	0.032	0	0
Gm17428	0	5.6673	0.728	0.009	0	0
Slc4a4	0	4.72187	0.74	0.022	0	0
Pcgf5	0	3.23846	0.784	0.066	0	0
Hk2	0	4.49485	0.739	0.022	0	0
Dmpk	0	3.46739	0.735	0.019	0	0
Myom1	0	4.27135	0.743	0.027	0	0
Mylk4	0	5.32881	0.728	0.013	0	0
Rnf207	0	4.30428	0.729	0.015	0	0
Cacna2d1	0	2.38886	0.915	0.201	0	0
Lrrfip2	0	2.37866	0.865	0.151	0	0
Ehbp1	0	2.63011	0.93	0.217	0	0
Myom2	0	4.79826	0.727	0.014	0	0
Macrod1	0	5.07036	0.726	0.014	0	0
Gpcpd1	0	2.84042	0.865	0.154	0	0
Neo1	0	3.35337	0.762	0.052	0	0
Rmdn1	0	2.56856	0.833	0.126	0	0
Immp2l	0	2.02805	0.868	0.163	0	0
Hmcn1	0	1.2018	0.882	0.179	0	0
Chchd3	0	2.34224	0.915	0.214	0	0
D830032E09Rik	0	5.55542	0.711	0.01	0	0
Vwa8	0	2.55989	0.853	0.152	0	0
Clip1	0	2.40794	0.853	0.154	0	0
Ppp2r3a	0	2.25141	0.911	0.214	0	0
Itgb6	0	6.01813	0.704	0.007	0	0
Mical3	0	2.3997	0.81	0.114	0	0
Pank1	0	5.30995	0.707	0.012	0	0
Neat1	0	2.5797	0.957	0.264	0	0
Srl	0	5.27509	0.704	0.012	0	0
Stau2	0	3.71426	0.734	0.043	0	0
Phtf2	0	3.55031	0.73	0.039	0	0
Insr	0	2.12334	0.898	0.21	0	0
Aco2	0	2.64559	0.776	0.088	0	0
Alpk2	0	5.62606	0.692	0.009	0	0
Rilpl1	0	4.0218	0.706	0.026	0	0
Ank2	0	2.46608	0.978	0.299	0	0
Gata4	0	2.22362	0.823	0.145	0	0
Magi3	0	2.27624	0.875	0.198	0	0
Bmpr1a	0	2.35183	0.816	0.14	0	0
Acss1	0	3.34381	0.715	0.043	0	0
Slc27a1	0	4.15958	0.683	0.014	0	0
Agl	0	3.31864	0.713	0.046	0	0
Lrrfip1	0	1.96371	0.82	0.154	0	0
Arhgap26	0	2.16968	0.953	0.29	0	0
Slc16a10	0	3.65823	0.697	0.034	0	0
Mfn1	0	2.81812	0.728	0.066	0	0
Lrrtm3	0	3.71906	0.697	0.035	0	0
Cap2	0	2.65195	0.721	0.06	0	0
Tmod1	0	3.61948	0.693	0.032	0	0
Psme4	0	2.19912	0.917	0.259	0	0
Esrrb	0	5.70923	0.665	0.008	0	0
Asph	0	2.07054	0.808	0.152	0	0
Abcd3	0	2.75663	0.731	0.076	0	0
Dsg2	0	5.19673	0.666	0.011	0	0
Mtus2	0	5.76629	0.662	0.008	0	0
Atcayos	0	5.6535	0.663	0.01	0	0
Ano4	0	3.93162	0.687	0.034	0	0
Plekhm2	0	2.43511	0.754	0.102	0	0
Kidins220	0	2.0442	0.812	0.16	0	0
Strip2	0	5.41219	0.654	0.008	0	0
Gm49708	0	6.52582	0.649	0.006	0	0
Ptpn4	0	2.27591	0.747	0.105	0	0
Prkaa2	0	4.73856	0.66	0.018	0	0
Ppm1l	0	3.08293	0.678	0.037	0	0
Usp28	0	3.96993	0.666	0.025	0	0
Inpp4b	0	1.18201	0.829	0.19	0	0
Sgcg	0	5.4339	0.645	0.008	0	0
Gm20732	0	2.35293	0.742	0.105	0	0
Rhobtb1	0	2.69713	0.732	0.096	0	0
Atp1a1	0	3.31001	0.68	0.045	0	0
Sbk1	0	5.28136	0.644	0.009	0	0
Trim63	0	4.86003	0.644	0.01	0	0
Wnk2	0	4.58714	0.648	0.015	0	0
Enah	0	2.17125	0.72	0.088	0	0
Casq2	0	3.20256	0.676	0.044	0	0
Ktn1	0	1.77413	0.87	0.238	0	0
Gm35330	0	6.26952	0.636	0.006	0	0
Popdc2	0	5.05239	0.639	0.009	0	0
Tpm1	0	2.12065	0.854	0.225	0	0
Fyco1	0	2.70453	0.695	0.066	0	0
Fblim1	0	3.0791	0.676	0.048	0	0
Large1	0	2.00736	0.942	0.314	0	0
Rarb	0	3.06138	0.679	0.052	0	0
Hadha	0	2.62515	0.704	0.078	0	0
Tmem38a	0	4.94186	0.637	0.011	0	0
Myzap	0	3.37345	0.672	0.047	0	0
Vldlr	0	5.35629	0.632	0.007	0	0
Etfa	0	2.39265	0.715	0.091	0	0
Celf2	0	0.832166	0.967	0.343	0	0
Gm12295	0	4.95816	0.633	0.01	0	0
Dsp	0	4.94272	0.635	0.012	0	0
Col4a5	0	2.68568	0.687	0.067	0	0
Abtb2	0	3.20464	0.661	0.041	0	0
Lpl	0	2.32912	0.733	0.113	0	0
Nipsnap2	0	2.66709	0.686	0.07	0	0
Tango2	0	2.80631	0.676	0.061	0	0
Phactr2	0	1.60768	0.819	0.205	0	0
Fsd2	0	5.74032	0.621	0.008	0	0
Cdh13	0	0.990985	0.958	0.345	0	0
Samd4	0	1.52738	0.895	0.282	0	0
Meis2	0	1.35862	0.824	0.212	0	0
Kif16b	0	2.01552	0.737	0.127	0	0
Ppp1r9a	0	2.00688	0.704	0.1	0	0
Trim7	0	5.1032	0.611	0.008	0	0
Fgf14	0	3.33213	0.631	0.028	0	0
Metap1d	0	2.11014	0.698	0.096	0	0
Trim54	0	5.17074	0.609	0.008	0	0
Usp2	0	4.53291	0.615	0.014	0	0
Bag3	0	2.8694	0.656	0.056	0	0
Me3	0	3.31835	0.635	0.036	0	0
Prkn	0	2.71448	0.747	0.148	0	0
Erc1	0	1.62461	0.792	0.196	0	0
Tcap	0	3.52016	0.618	0.022	0	0
Pdlim5	0	1.86939	0.928	0.335	0	0
Hadhb	0	2.74703	0.654	0.061	0	0
Nr3c2	0	1.47456	0.894	0.301	0	0
Msi2	0	1.90563	0.971	0.378	0	0
Cobll1	0	1.24899	0.762	0.171	0	0
Stk39	0	2.16518	0.754	0.163	0	0
Slc4a3	0	4.11872	0.604	0.014	0	0
Abhd18	0	2.63262	0.659	0.07	0	0
Tfdp2	0	2.2877	0.68	0.092	0	0
Prkca	0	1.43373	0.788	0.2	0	0
Clybl	0	2.24008	0.675	0.087	0	0
Rgs6	0	1.31665	0.731	0.143	0	0
Adra1a	0	4.80268	0.6	0.012	0	0
Macrod2	0	3.08884	0.631	0.045	0	0
Mlf1	0	5.00486	0.596	0.01	0	0
Bcl9	0	2.8395	0.637	0.053	0	0
Slc25a12	0	2.09211	0.681	0.098	0	0
Tmem65	0	2.14639	0.705	0.122	0	0
Mapk10	0	5.65687	0.589	0.007	0	0
Sesn1	0	1.6521	0.742	0.161	0	0
Lclat1	0	2.7529	0.642	0.062	0	0
Lrrc39	0	4.37839	0.595	0.015	0	0
Reep1	0	4.03551	0.598	0.019	0	0
Slk	0	1.56096	0.76	0.184	0	0
Gja1	0	2.37814	0.643	0.069	0	0
Cyfip2	0	4.77216	0.584	0.01	0	0
Retreg1	0	2.63901	0.624	0.052	0	0
Fbxo32	0	4.74628	0.587	0.015	0	0
Svil	0	1.31906	0.913	0.342	0	0
Lrrc3b	0	2.22604	0.64	0.071	0	0
Nceh1	0	3.66761	0.596	0.027	0	0
Ifrd1	0	2.27086	0.647	0.079	0	0
Homer2	0	5.4125	0.575	0.007	0	0
Ghr	0	1.19738	0.948	0.38	0	0
Slc20a2	0	2.39952	0.641	0.075	0	0
Gm17276	0	2.786	0.62	0.054	0	0
Smpx	0	5.47963	0.572	0.008	0	0
Pde3a	0	0.785253	0.839	0.277	0	0
Fbxo40	0	5.24752	0.568	0.006	0	0
Pdzrn3	0	1.7917	0.683	0.122	0	0
Pde7a	0	2.50796	0.637	0.077	0	0
Efna5	0	1.3367	0.712	0.152	0	0
Acox1	0	2.11732	0.648	0.09	0	0
Epb41	0	0.878197	0.813	0.255	0	0
Dpyd	0	1.90337	0.631	0.074	0	0
Rpl3l	0	5.30526	0.562	0.005	0	0
Map3k20	0	1.16298	0.738	0.181	0	0
Zfp827	0	2.06669	0.638	0.082	0	0
Tead1	0	1.2103	0.832	0.278	0	0
Tmem245	0	1.36119	0.74	0.187	0	0
Gm24474	0	5.11822	0.56	0.008	0	0
Hand2os1	0	3.29295	0.581	0.031	0	0
Gk	0	4.2859	0.564	0.015	0	0
Acadm	0	2.59177	0.596	0.048	0	0
Setbp1	0	0.762407	0.827	0.279	0	0
Asb18	0	5.60611	0.554	0.007	0	0
Hdac4	0	1.64022	0.694	0.147	0	0
Snta1	0	3.7691	0.569	0.023	0	0
Plscr2	0	2.31422	0.602	0.057	0	0
Vps13d	0	1.19062	0.81	0.266	0	0
Fam214a	0	1.78753	0.657	0.113	0	0
Ldhb	0	3.20241	0.574	0.03	0	0
Ctnna1	0	1.32977	0.855	0.313	0	0
Arhgap21	0	1.00256	0.786	0.246	0	0
Asb15	0	5.34194	0.546	0.006	0	0
Filip1	0	0.931691	0.832	0.292	0	0
Acat1	0	2.14461	0.618	0.079	0	0
Camk2d	0	1.47191	0.93	0.392	0	0
Lgals4	0	3.97424	0.548	0.01	0	0
Yipf7	0	5.13682	0.544	0.007	0	0
Msrb3	0	0.977254	0.799	0.262	0	0
Hif1a	0	2.29492	0.614	0.078	0	0
Slc12a7	0	3.02101	0.575	0.039	0	0
Pygm	0	2.74315	0.573	0.037	0	0
Fgfr2	0	1.47108	0.793	0.258	0	0
Med12l	0	3.35261	0.566	0.031	0	0
4930402H24Rik	0	1.01058	0.873	0.34	0	0
Tnik	0	0.928026	0.7	0.167	0	0
Gm13481	0	6.18667	0.538	0.006	0	0
Ehd4	0	1.6735	0.635	0.104	0	0
Dnmt3a	0	1.17028	0.744	0.213	0	0
Kcnip2	0	5.38243	0.534	0.005	0	0
Fam13a	0	3.75789	0.553	0.025	0	0
Ntn1	0	1.71909	0.64	0.112	0	0
Itgb1bp2	0	4.9538	0.536	0.008	0	0
Dot1l	0	2.5005	0.581	0.054	0	0
Zfpm2	0	0.684673	0.939	0.412	0	0
Cep85	0	3.07452	0.558	0.032	0	0
Ube2g1	0	1.3165	0.706	0.18	0	0
Gm47644	0	4.92863	0.537	0.012	0	0
Mir133a-1hg	0	4.58481	0.534	0.009	0	0
Zmynd8	0	1.15103	0.734	0.21	0	0
Dag1	0	1.87986	0.625	0.101	0	0
Hnrnpl	0	1.51624	0.652	0.129	0	0
Trak2	0	2.37141	0.594	0.072	0	0
Gab1	0	0.971581	0.801	0.279	0	0
Mdh1	0	2.78146	0.558	0.037	0	0
Atg10	0	1.4378	0.674	0.153	0	0
Dip2c	0	1.50692	0.951	0.43	0	0
Plekha6	0	0.933236	0.685	0.167	0	0
Art3	0	1.23731	0.643	0.125	0	0
Klhl24	0	1.25604	0.674	0.156	0	0
Fsd1l	0	2.10319	0.596	0.079	0	0
Miga2	0	4.13897	0.53	0.015	0	0
Lgr6	0	4.89957	0.523	0.009	0	0
Slmap	0	1.16271	0.758	0.244	0	0
Intu	0	4.48288	0.526	0.013	0	0
Apex2	0	3.14877	0.574	0.061	0	0
Mapt	0	3.52038	0.535	0.024	0	0
Pik3r1	0	1.14315	0.741	0.23	0	0
Cox10	0	2.63798	0.556	0.046	0	0
Pdzrn4	0	4.65921	0.521	0.011	0	0
Adprhl1	0	4.14899	0.523	0.014	0	0
Angpt1	0	2.32986	0.619	0.11	0	0
Pfkm	0	4.18019	0.52	0.011	0	0
Kif1b	0	1.04439	0.821	0.313	0	0
Golga4	0	1.49894	0.651	0.143	0	0
Adcy6	0	1.77464	0.587	0.08	0	0
Ppip5k1	0	2.83729	0.547	0.041	0	0
Pptc7	0	2.64213	0.552	0.046	0	0
Clip4	0	4.92067	0.513	0.009	0	0
Csrp3	0	3.83321	0.517	0.014	0	0
Fnip1	0	1.01122	0.728	0.225	0	0
Trak1	0	0.962863	0.838	0.336	0	0
Ablim1	0	0.607104	0.963	0.461	0	0
Fxr1	0	1.17411	0.678	0.177	0	0
Arhgap10	0	0.706096	0.764	0.263	0	0
Rhot1	0	1.45224	0.624	0.124	0	0
Prox1	0	3.13614	0.516	0.017	0	0
Zfp445	0	1.37957	0.65	0.151	0	0
Lpin1	0	3.62818	0.525	0.026	0	0
Zbtb16	0	0.852459	0.812	0.315	0	0
Tlr4	0	2.73917	0.563	0.066	0	0
Ptprd	0	0.920258	0.654	0.158	0	0
Gm31013	0	5.92645	0.501	0.005	0	0
2210408F21Rik	0	1.84929	0.629	0.134	0	0
Mia2	0	1.34777	0.651	0.156	0	0
Map3k5	0	0.771599	0.757	0.263	0	0
Ripor2	0	2.1316	0.538	0.045	0	0
Shld1	0	4.15401	0.518	0.025	0	0
Osbpl8	0	0.961357	0.711	0.218	0	0
Ptgr2	0	3.39583	0.518	0.025	0	0
Ubr5	0	0.894485	0.816	0.323	0	0
Synj2	0	2.63204	0.542	0.05	0	0
Zfp697	0	2.88284	0.529	0.038	0	0
Idh2	0	1.76802	0.561	0.072	0	0
Pgm5	0	1.4554	0.564	0.075	0	0
Aak1	0	0.791835	0.762	0.275	0	0
Sptb	0	4.13696	0.5	0.014	0	0
Kif13a	0	0.655103	0.767	0.281	0	0
Ppfia1	0	1.70977	0.582	0.097	0	0
Sobp	0	0.770321	0.703	0.218	0	0
Zfp106	0	1.46588	0.603	0.119	0	0
Ndufaf4	0	3.19406	0.51	0.026	0	0
Esrra	0	3.19691	0.508	0.024	0	0
Appl2	0	1.99316	0.552	0.069	0	0
Gpam	0	2.93793	0.516	0.033	0	0
Qk	0	1.51585	0.944	0.462	0	0
Tnfaip8	0	0.979834	0.671	0.19	0	0
Pde7b	0	1.06997	0.698	0.217	0	0
Tom1	0	1.93	0.555	0.075	0	0
Mtus1	0	0.918515	0.66	0.181	0	0
Etfdh	0	3.31193	0.503	0.025	0	0
Atp8a1	0	0.719884	0.673	0.196	0	0
Rassf8	0	1.63064	0.576	0.1	0	0
Mpped2	0	1.78547	0.555	0.08	0	0
Aox1	0	2.21637	0.543	0.069	0	0
Sacs	0	2.33084	0.526	0.052	0	0
Pbx1	0	0.876989	0.94	0.466	0	0
Agtr1a	0	3.1626	0.5	0.027	0	0
Ndufs4	0	1.02998	0.647	0.175	0	0
Tom1l2	0	0.813282	0.739	0.267	0	0
Stard7	0	2.59437	0.511	0.04	0	0
Fbxw7	0	1.06778	0.661	0.19	0	0
Ptpn3	0	2.15564	0.535	0.067	0	0
Fgd4	0	1.4005	0.571	0.103	0	0
Dlat	0	2.23831	0.52	0.053	0	0
Cpeb4	0	1.30019	0.612	0.145	0	0
Ltbp1	0	0.674083	0.687	0.222	0	0
Adamtsl5	0	2.73025	0.506	0.041	0	0
Atxn2	0	0.841794	0.705	0.24	0	0
Prickle1	0	1.13582	0.612	0.147	0	0
Slf1	0	1.66409	0.553	0.089	0	0
Mgat5	0	0.914298	0.637	0.173	0	0
Hipk2	0	1.29681	0.578	0.114	0	0
Bzw2	0	1.93531	0.527	0.065	0	0
Tnnc1	0	1.05543	0.604	0.142	0	0
Antxr2	0	0.904411	0.639	0.178	0	0
Gata6	0	2.13362	0.521	0.06	0	0
Atf6	0	1.15409	0.627	0.166	0	0
Zkscan3	0	1.18575	0.609	0.148	0	0
Mpp5	0	1.70041	0.544	0.084	0	0
Lrpprc	0	1.80571	0.543	0.083	0	0
Gm37240	0	0.960359	0.638	0.179	0	0
Rsrp1	0	0.676662	0.783	0.324	0	0
Naca	0	2.0705	0.513	0.054	0	0
1010001N08Rik	0	2.37922	0.502	0.043	0	0
Usp54	0	2.01306	0.521	0.068	0	0
Pacsin2	0	0.974097	0.64	0.189	0	0
Pcnt	0	1.97988	0.515	0.065	0	0
Kansl1l	0	0.642313	0.731	0.281	0	0
Pkia	0	1.64692	0.537	0.089	0	0
Map4	0	0.789332	0.868	0.42	0	0
Vps13a	0	0.841587	0.642	0.194	0	0
Lonp2	0	0.854845	0.654	0.208	0	0
Pcca	0	0.787219	0.656	0.21	0	0
Mef2d	0	0.824291	0.631	0.185	0	0
Cdkal1	0	0.603315	0.787	0.341	0	0
Uqcc1	0	1.72535	0.524	0.079	0	0
Atp1a2	0	0.889447	0.602	0.157	0	0
Hdlbp	0	1.14682	0.584	0.141	0	0
Tef	0	1.07589	0.591	0.148	0	0
Nos1ap	0	1.65306	0.505	0.063	0	0
Hipk3	0	1.03508	0.601	0.161	0	0
Trip11	0	0.707298	0.675	0.237	0	0
Fam126a	0	1.15202	0.568	0.13	0	0
Fhit	0	1.17068	0.57	0.133	0	0
Arfgef2	0	1.21769	0.561	0.125	0	0
Sltm	0	0.662899	0.68	0.244	0	0
Cnksr3	0	1.67301	0.522	0.086	0	0
St3gal3	0	1.02059	0.571	0.136	0	0
Eps15l1	0	0.809185	0.624	0.19	0	0
D5Ertd579e	0	0.96449	0.596	0.163	0	0
Dcaf6	0	0.829549	0.633	0.201	0	0
Slc25a3	0	0.903766	0.582	0.15	0	0
Mapkapk2	0	1.25885	0.542	0.111	0	0
Tsc22d4	0	1.31315	0.54	0.11	0	0
Lpgat1	0	1.7041	0.509	0.079	0	0
Dst	0	0.966272	0.945	0.517	0	0
Gse1	0	1.22463	0.584	0.156	0	0
Aig1	0	0.641343	0.616	0.189	0	0
Foxo3	0	0.788154	0.651	0.225	0	0
Urgcp	0	1.19327	0.545	0.119	0	0
Dnaja2	0	1.73466	0.503	0.077	0	0
Lin52	0	1.066	0.553	0.128	0	0
Agtpbp1	0	1.31665	0.562	0.137	0	0
Ndufs1	0	1.46483	0.51	0.085	0	0
Mir99ahg	0	1.35804	0.754	0.329	0	0
Ube2b	0	1.32484	0.554	0.131	0	0
Osbpl1a	0	1.34664	0.524	0.103	0	0
Pitpnm2	0	0.895867	0.566	0.145	0	0
Dym	0	0.698574	0.613	0.194	0	0
Tmem131l	0	1.30395	0.509	0.092	0	0
Mapre2	0	1.0064	0.58	0.168	0	0
Slain2	0	0.936682	0.558	0.149	0	0
Acadl	0	1.45325	0.502	0.094	0	0
Nsmaf	0	1.05806	0.529	0.121	0	0
Larp4	0	1.21914	0.512	0.104	0	0
Mgrn1	0	1.28432	0.51	0.102	0	0
Ttc17	0	0.64901	0.605	0.198	0	0
Hibadh	0	0.826661	0.563	0.157	0	0
Gbe1	0	1.0023	0.531	0.126	0	0
Kcmf1	0	0.597761	0.618	0.214	0	0
Schip1	0	0.715904	0.554	0.155	0	0
Npepps	0	0.599167	0.606	0.208	0	0
Txnip	0	1.49355	0.505	0.11	0	0
Sdha	0	0.910924	0.522	0.127	0	0
Pkig	0	0.824621	0.533	0.139	0	0
Cecr2	0	0.690701	0.525	0.131	0	0
Cdc37l1	0	0.710753	0.568	0.174	0	0
Luc7l2	0	0.975073	0.955	0.566	0	0
Ppp6r2	0	0.797034	0.54	0.152	0	0
Clcn3	0	0.860009	0.521	0.134	0	0
Son	0	0.645123	0.91	0.524	0	0
St7	0	0.683649	0.562	0.177	0	0
Dcaf8	0	0.64853	0.564	0.179	0	0
Il15	0	0.84587	0.556	0.177	0	0
Pakap	0	0.725006	0.509	0.13	0	0
Afg1l	0	0.626695	0.547	0.168	0	0
Srrm1	0	0.593998	0.569	0.19	0	0
Akap8l	0	0.854427	0.51	0.132	0	0
Myl2	0	0.863018	0.524	0.153	0	0
Slc38a2	0	0.955604	0.552	0.183	0	0
Yap1	0	0.805552	0.514	0.147	0	0
Lncpint	0	0.781912	0.927	0.573	0	0
Slc25a36	0	0.648852	0.503	0.154	0	0
Gm26917	0	0.773504	0.575	0.283	0	0
Malat1	0	1.31344	1	0.971	0	0
Flt1	0	4.94746	0.846	0.043	0	1
Cyyr1	0	5.04233	0.838	0.038	0	1
Adgrl4	0	5.60009	0.823	0.034	0	1
Plcb1	0	4.46951	0.833	0.062	0	1
Ptprb	0	4.62381	0.793	0.044	0	1
Fabp4	0	5.46052	0.772	0.041	0	1
Prkch	0	4.18668	0.787	0.07	0	1
Fli1	0	3.51413	0.876	0.16	0	1
Itpkb	0	4.11193	0.847	0.133	0	1
Adgrf5	0	4.50556	0.773	0.06	0	1
Ccdc85a	0	7.01014	0.724	0.012	0	1
Shank3	0	4.77315	0.718	0.038	0	1
Tmtc2	0	4.49661	0.716	0.04	0	1
Sema6a	0	3.89278	0.767	0.101	0	1
Dach1	0	4.38606	0.781	0.121	0	1
Arhgap31	0	3.1963	0.816	0.161	0	1
Kitl	0	4.19118	0.741	0.091	0	1
Itga6	0	5.37492	0.687	0.038	0	1
Egfl7	0	4.71193	0.684	0.036	0	1
Dock9	0	3.40361	0.754	0.109	0	1
Nav3	0	5.45788	0.662	0.038	0	1
Pecam1	0	3.55315	0.651	0.053	0	1
St6galnac3	0	3.48498	0.645	0.049	0	1
Lims2	0	4.3613	0.653	0.057	0	1
Ablim3	0	5.11107	0.623	0.032	0	1
Emcn	0	4.28129	0.624	0.036	0	1
Mgll	0	4.42095	0.669	0.093	0	1
Ldb2	0	3.05063	0.637	0.066	0	1
Mecom	0	1.86117	0.784	0.228	0	1
Etl4	0	3.80221	0.886	0.331	0	1
Cav1	0	4.56639	0.592	0.037	0	1
Mcc	0	3.25805	0.679	0.135	0	1
Myo1d	0	3.28633	0.659	0.116	0	1
Tshz2	0	2.40697	0.783	0.241	0	1
Adamts9	0	4.5698	0.64	0.098	0	1
Plcb4	0	3.58434	0.905	0.367	0	1
Rasgrp3	0	4.03051	0.602	0.066	0	1
Kdr	0	5.38461	0.557	0.022	0	1
Mcf2l	0	5.56605	0.55	0.016	0	1
Elk3	0	3.27198	0.616	0.099	0	1
Nrp2	0	3.94333	0.583	0.068	0	1
Ets1	0	2.92258	0.655	0.142	0	1
Tspan7	0	4.67049	0.579	0.068	0	1
Cdh5	0	4.88384	0.536	0.026	0	1
Ushbp1	0	4.98181	0.528	0.021	0	1
Myo10	0	3.8516	0.638	0.133	0	1
Fbxl7	0	2.28197	0.733	0.232	0	1
Fgd5	0	4.01966	0.542	0.042	0	1
Prex2	0	1.94343	0.761	0.262	0	1
Eng	0	3.06719	0.589	0.095	0	1
Samd12	0	4.03913	0.524	0.032	0	1
Slc28a2	0	5.40973	0.51	0.019	0	1
Rasgrf2	0	4.08689	0.518	0.028	0	1
Dgkh	0	3.06246	0.6	0.114	0	1
Erg	0	4.40344	0.509	0.03	0	1
Lrrc8c	0	3.27475	0.577	0.099	0	1
Ebf1	0	0.680764	0.823	0.358	0	1
Nxpe4	0	3.53256	0.535	0.072	0	1
Dnm3	0	3.34522	0.56	0.098	0	1
Pdgfd	0	2.82425	0.704	0.243	0	1
Itga1	0	2.24433	0.622	0.169	0	1
Elmo1	0	1.52195	0.715	0.264	0	1
Rapgef5	0	2.62506	0.627	0.177	0	1
Arhgap18	0	3.12258	0.607	0.157	0	1
Zbtb46	0	3.68832	0.519	0.083	0	1
Col4a1	0	2.52792	0.624	0.19	0	1
Galnt18	0	2.85024	0.605	0.172	0	1
Oxr1	0	2.72406	0.71	0.294	0	1
Tcf4	0	2.27212	0.938	0.522	0	1
Xdh	0	2.84272	0.546	0.131	0	1
Tek	0	2.61551	0.517	0.114	0	1
App	0	1.69049	0.652	0.254	0	1
Bmp6	0	2.82587	0.504	0.108	0	1
Afdn	0	2.96465	0.689	0.294	0	1
Eepd1	0	3.91969	0.503	0.109	0	1
Rapgef1	0	2.8962	0.711	0.318	0	1
Dock4	0	2.67434	0.79	0.398	0	1
Plpp3	0	2.6114	0.568	0.179	0	1
Magi1	0	2.62123	0.863	0.476	0	1
Hspg2	0	2.51281	0.642	0.262	0	1
Lyn	0	1.62256	0.52	0.147	0	1
Stox2	0	2.90081	0.776	0.403	0	1
Tanc1	0	2.55716	0.668	0.3	0	1
Syne2	0	2.0063	0.553	0.191	0	1
Vav3	0	1.45801	0.577	0.216	0	1
Nav1	0	1.333	0.609	0.251	0	1
Plekhg1	0	2.47871	0.544	0.188	0	1
Pitpnc1	0	2.48373	0.828	0.475	0	1
AY036118	0	1.46422	0.76	0.41	0	1
Nedd9	0	2.39907	0.539	0.201	0	1
Klf7	0	2.04637	0.642	0.314	0	1
Snrk	0	2.33285	0.65	0.323	0	1
Cdk17	0	2.39156	0.539	0.214	0	1
Apbb2	0	2.46347	0.856	0.534	0	1
Akt3	0	1.36435	0.596	0.279	0	1
Ptprg	0	2.92197	0.944	0.635	0	1
4931406P16Rik	0	2.43048	0.543	0.237	0	1
Syne1	0	2.31478	0.752	0.446	0	1
Maml2	0	0.753993	0.692	0.386	0	1
Ptk2	0	2.04297	0.697	0.397	0	1
Ptprm	0	2.32876	0.961	0.661	0	1
Rftn1	0	2.36643	0.675	0.377	0	1
Col4a2	0	2.48941	0.604	0.306	0	1
Adgrl2	0	2.61543	0.671	0.377	0	1
Lrmda	0	1.99847	0.615	0.321	0	1
Cd36	0	1.69869	0.808	0.515	0	1
Dennd5b	0	2.38255	0.545	0.259	0	1
Ablim11	0	1.2729	0.877	0.594	0	1
Plxna2	0	2.46167	0.616	0.343	0	1
Wasf2	0	1.69095	0.56	0.289	0	1
Gm42418	0	1.17802	0.904	0.639	0	1
Srgap2	0	1.5739	0.635	0.378	0	1
Rasal2	0	2.05362	0.776	0.52	0	1
Ttc28	0	1.48666	0.659	0.408	0	1
Dock1	0	1.65688	0.677	0.428	0	1
Cep85l	0	2.36268	0.517	0.268	0	1
Tmcc3	0	1.27121	0.557	0.311	0	1
Hdac9	0	2.63806	0.71	0.464	0	1
Map4k3	0	2.12708	0.587	0.343	0	1
Pkp4	0	2.43437	0.589	0.361	0	1
Cdh131	0	1.00733	0.758	0.535	0	1
Arhgef3	0	1.79486	0.618	0.414	0	1
Camk1d	0	1.06169	0.648	0.447	0	1
Wwtr1	0	1.88963	0.546	0.349	0	1
Rapgef2	0	1.42234	0.754	0.564	0	1
Lama4	0	1.47072	0.557	0.371	0	1
Dysf	0	1.79012	0.6	0.418	0	1
Numb	0	1.72517	0.516	0.341	0	1
Cyth1	0	1.96442	0.523	0.354	0	1
Phlpp1	0	1.78925	0.61	0.444	0	1
Picalm	0	1.63419	0.656	0.494	0	1
Nrp1	0	1.53777	0.785	0.624	0	1
Arhgap29	0	1.74178	0.553	0.403	0	1
Ccny	0	1.6703	0.527	0.386	0	1
Heg1	0	1.00998	0.661	0.521	0	1
Arl15	0	1.09252	0.643	0.507	0	1
Clic4	0	1.79827	0.505	0.371	0	1
Mef2c	0	1.18901	0.643	0.518	0	1
Fcho2	0	1.28123	0.537	0.433	0	1
Sptbn1	0	1.2292	0.917	0.814	0	1
Ext1	0	1.10744	0.76	0.675	0	1
Sgms1	0	1.41693	0.607	0.526	0	1
Utrn	0	1.00582	0.726	0.646	0	1
Pakap.1	0	1.39776	0.538	0.469	0	1
Gnaq	0	0.822386	0.596	0.531	0	1
Fry	0	0.950663	0.672	0.608	0	1
Tcf12	0	1.03609	0.672	0.615	0	1
Peak1	0	0.977772	0.605	0.568	0	1
Ralgapa1	0	1.1033	0.64	0.608	0	1
Trio	0	1.11943	0.544	0.517	0	1
Gphn	0	0.880121	0.727	0.751	0	1
Nfib	0	0.732874	0.74	0.725	0	1
Etv6	3.10431e-301	1.08431	0.534	0.461	1.03752e-296	1
Baz2b	2.54057e-257	0.793836	0.615	0.64	8.49108e-253	1
Cped1	8.1621e-253	0.635509	0.652	0.668	2.72794e-248	1
Lrch1	2.49003e-216	1.02621	0.501	0.475	8.32218e-212	1
Arhgef12	1.58322e-209	0.740675	0.619	0.665	5.29143e-205	1
Stag1	1.30683e-198	0.773815	0.561	0.521	4.3677e-194	1
Ptprk	7.94618e-194	0.738236	0.514	0.477	2.65577e-189	1
Atxn1	9.22336e-188	0.603683	0.676	0.706	3.08263e-183	1
Spag9	3.95151e-178	0.790209	0.565	0.599	1.32067e-173	1
Ppp3ca	8.09472e-178	0.626482	0.614	0.637	2.70542e-173	1
Nbeal1	4.02102e-152	0.814993	0.555	0.599	1.34391e-147	1
Prkce	1.04371e-105	0.654812	0.576	0.618	3.48829e-101	1
Pard3b	1.17877e-102	0.701643	0.616	0.689	3.93968e-98	1
Diaph2	7.43377e-86	0.603073	0.614	0.687	2.48451e-81	1
Cmss1	3.50565e-73	1.0105	0.63	0.686	1.17166e-68	1
Sbf2	5.94402e-72	0.605778	0.57	0.647	1.98661e-67	1
Klf12	2.01883e-55	0.742817	0.52	0.586	6.74733e-51	1
Exoc6b	5.02738e-32	0.633798	0.482	0.521	1.68025e-27	1
Pan3	4.49228e-26	0.667454	0.484	0.538	1.50141e-21	1
Pcdh9	0	8.26444	0.922	0.008	0	2
Bicc1	0	5.7201	0.933	0.062	0	2
Abca8a	0	5.31989	0.932	0.062	0	2
Gpc6	0	3.24769	0.968	0.11	0	2
Kcnt2	0	4.16065	0.906	0.073	0	2
Tenm3	0	6.4489	0.838	0.012	0	2
Rbms3	0	3.1634	0.957	0.167	0	2
Sox5	0	3.06027	0.9	0.111	0	2
Dcn	0	6.77483	0.78	0.014	0	2
Tnxb	0	5.99846	0.775	0.022	0	2
Ebf2	0	3.25564	0.842	0.09	0	2
Plxdc2	0	3.3197	0.882	0.138	0	2
Gsn	0	5.66427	0.728	0.031	0	2
C1qtnf7	0	7.45921	0.693	0.007	0	2
Negr1	0	6.29945	0.694	0.013	0	2
Pcsk6	0	6.0608	0.696	0.017	0	2
Eda	0	4.35741	0.723	0.056	0	2
Naaladl2	0	7.81785	0.67	0.01	0	2
Gpm6b	0	6.82622	0.65	0.006	0	2
Col8a1	0	5.02303	0.672	0.036	0	2
Meg3	0	4.72013	0.661	0.033	0	2
Pde1a	0	3.64175	0.688	0.063	0	2
Thsd7a	0	3.43662	0.714	0.089	0	2
Arhgap24	0	5.05469	0.733	0.11	0	2
Egfr	0	4.85169	0.658	0.035	0	2
Smoc2	0	7.40538	0.633	0.014	0	2
Htra3	0	7.77465	0.62	0.002	0	2
Sulf1	0	4.06919	0.645	0.037	0	2
Abca8b	0	4.60599	0.642	0.036	0	2
Trps1	0	2.29997	0.812	0.209	0	2
Foxp2	0	4.32305	0.727	0.126	0	2
Scn7a	0	3.98945	0.629	0.029	0	2
Lamc1	0	3.22983	0.84	0.246	0	2
Adamts5	0	5.95668	0.609	0.018	0	2
Ddr2	0	4.31303	0.628	0.042	0	2
Aldh1a1	0	6.61446	0.593	0.007	0	2
Col3a1	0	5.30129	0.606	0.023	0	2
Mecom1	0	1.13707	0.842	0.263	0	2
Ngf	0	3.51066	0.643	0.064	0	2
Col15a1	0	4.50697	0.616	0.038	0	2
Sdc2	0	4.03218	0.673	0.098	0	2
Adamts10	0	3.69481	0.638	0.066	0	2
Lpar1	0	6.4432	0.58	0.008	0	2
Mir100hg	0	3.72897	0.768	0.203	0	2
Gulp1	0	2.32923	0.704	0.149	0	2
Col5a2	0	3.44929	0.613	0.061	0	2
Ebf11	0	1.11903	0.926	0.377	0	2
Pid1	0	0.941156	0.7	0.161	0	2
Lsamp	0	3.59777	0.59	0.054	0	2
Abi3bp	0	5.12828	0.549	0.015	0	2
Itgbl1	0	5.62141	0.545	0.012	0	2
Sh3d19	0	2.99065	0.65	0.12	0	2
Slit3	0	4.37943	0.576	0.047	0	2
Pdgfra	0	8.25157	0.53	0.002	0	2
Bmper	0	7.8066	0.535	0.009	0	2
Lhfp	0	2.6075	0.886	0.361	0	2
Rhoj	0	2.27255	0.739	0.214	0	2
Abca6	0	5.13295	0.549	0.025	0	2
Fstl1	0	3.96379	0.573	0.055	0	2
Ust	0	3.73397	0.576	0.063	0	2
Ar	0	4.69804	0.539	0.028	0	2
Gli3	0	3.86022	0.547	0.043	0	2
B3galt1	0	3.23905	0.646	0.143	0	2
Slit2	0	5.06661	0.513	0.015	0	2
Lrp1	0	3.47419	0.551	0.054	0	2
Cfh	0	2.09358	0.6	0.103	0	2
Antxr1	0	5.32629	0.507	0.016	0	2
Zeb2	0	1.19934	0.817	0.329	0	2
Maml21	0	1.38826	0.865	0.378	0	2
Slc1a5	0	4.52663	0.509	0.027	0	2
Nav11	0	1.51708	0.732	0.257	0	2
Gucy1a2	0	1.66182	0.561	0.094	0	2
Slc43a3	0	2.9296	0.572	0.106	0	2
Fbn1	0	2.32297	0.621	0.161	0	2
Fgfr1	0	3.59504	0.529	0.071	0	2
Mast4	0	1.69639	0.923	0.468	0	2
Cyth3	0	2.65454	0.672	0.219	0	2
Celf21	0	1.8826	0.967	0.518	0	2
Atp8b1	0	2.939	0.519	0.083	0	2
Lama2	0	2.0942	0.954	0.526	0	2
Fkbp5	0	2.94113	0.505	0.078	0	2
Sntb2	0	2.36264	0.546	0.13	0	2
Prex21	0	0.836568	0.726	0.31	0	2
Agmo	0	1.98655	0.551	0.137	0	2
Tshz3	0	2.38339	0.512	0.101	0	2
Nid1	0	2.57002	0.517	0.107	0	2
Akt31	0	1.13084	0.697	0.287	0	2
Epb41l2	0	1.51923	0.612	0.206	0	2
Sept11	0	2.08712	0.541	0.136	0	2
Zeb1	0	2.48315	0.927	0.522	0	2
Igfbp7	0	1.38933	0.593	0.197	0	2
Wipf1	0	1.48819	0.601	0.213	0	2
Cdk14	0	1.49811	0.624	0.237	0	2
Fbxl71	0	0.768766	0.671	0.285	0	2
Vav31	0	1.15872	0.623	0.237	0	2
Ror1	0	2.07499	0.719	0.343	0	2
Lrrk1	0	2.04464	0.511	0.141	0	2
Gab2	0	1.93987	0.872	0.503	0	2
Eps15	0	1.79686	0.544	0.185	0	2
Prickle2	0	1.39449	0.531	0.174	0	2
Mid1	0	2.38529	0.663	0.31	0	2
Arhgap6	0	1.59544	0.735	0.398	0	2
Zfpm21	0	1.26278	0.891	0.568	0	2
Fndc3b	0	1.97489	0.828	0.506	0	2
Sgcd	0	2.38151	0.775	0.461	0	2
Tcf7l1	0	1.5863	0.572	0.258	0	2
Atrnl1	0	1.81258	0.799	0.486	0	2
Rora	0	2.11999	0.98	0.677	0	2
Cpq	0	1.81868	0.716	0.415	0	2
Mir99ahg1	0	0.731106	0.747	0.449	0	2
Gls	0	1.52715	0.55	0.254	0	2
Ldlrad4	0	1.73946	0.753	0.463	0	2
Ghr1	0	1.15051	0.841	0.559	0	2
Lama41	0	1.11752	0.65	0.369	0	2
Ttc281	0	0.925104	0.7	0.421	0	2
Kif13b	0	1.90464	0.578	0.305	0	2
Cdk8	0	1.18882	0.75	0.478	0	2
Tbx20	0	2.38711	0.57	0.298	0	2
Cask	0	1.49304	0.511	0.24	0	2
Sash1	0	1.00466	0.554	0.284	0	2
Lima1	0	1.67561	0.516	0.253	0	2
Plekha61	0	1.9363	0.591	0.33	0	2
Fndc3a	0	1.51243	0.52	0.266	0	2
Ssbp2	0	1.6791	0.592	0.344	0	2
Tacc1	0	1.24689	0.517	0.276	0	2
Tgfbr3	0	1.65275	0.617	0.385	0	2
Crtc3	0	1.74274	0.508	0.276	0	2
Heg11	0	1.13582	0.745	0.517	0	2
Zfp521	0	1.42486	0.681	0.457	0	2
Ptprd1	0	1.77595	0.54	0.318	0	2
Esyt2	0	1.44915	0.522	0.303	0	2
Pam	0	1.28374	0.723	0.508	0	2
Man1a	0	1.46879	0.528	0.314	0	2
Setbp11	0	1.1644	0.673	0.461	0	2
Tnik1	0	1.77579	0.552	0.344	0	2
Eif4g3	0	1.19363	0.603	0.401	0	2
Airn	0	1.15503	0.794	0.593	0	2
Chd9	0	1.2941	0.747	0.548	0	2
Stag11	0	0.909397	0.694	0.499	0	2
Pard3b1	0	1.03987	0.835	0.642	0	2
St5	0	1.14921	0.521	0.329	0	2
Igf2r	0	1.3942	0.528	0.336	0	2
Sec24d	0	1.54244	0.528	0.343	0	2
Ncoa1	0	1.32835	0.621	0.439	0	2
Plekha5	0	1.44443	0.581	0.399	0	2
Arhgap211	0	1.24247	0.61	0.43	0	2
Nktr	0	1.27393	0.569	0.395	0	2
Igf1r	0	1.0232	0.686	0.516	0	2
Tnpo1	0	1.29905	0.5	0.332	0	2
Nfia	0	1.31294	0.938	0.77	0	2
Nfix	0	1.49877	0.506	0.34	0	2
Rbms1	0	0.897646	0.836	0.683	0	2
Fam172a	0	0.819724	0.626	0.477	0	2
Hivep2	0	1.09439	0.698	0.549	0	2
Phf21a	0	0.931577	0.645	0.504	0	2
Ube2e2	0	1.03709	0.653	0.512	0	2
Sobp1	0	1.22257	0.526	0.387	0	2
Auts2	0	0.596895	0.789	0.651	0	2
Cped11	0	0.78833	0.776	0.644	0	2
Dnajc1	0	0.961399	0.592	0.464	0	2
Meis1	0	1.18764	0.512	0.386	0	2
Itpr1	0	0.995874	0.706	0.586	0	2
Zbtb161	0	0.852958	0.61	0.492	0	2
Pard3	0	0.703277	0.613	0.506	0	2
Ogt	0	0.853338	0.565	0.47	0	2
Akap13	0	0.776999	0.728	0.639	0	2
Nedd4	0	0.64591	0.659	0.576	0	2
Zbtb20	0	0.626095	0.981	0.898	0	2
Asap1	0	0.693131	0.699	0.619	0	2
Zcchc7	0	0.648564	0.662	0.597	0	2
Ssh2	0	0.671899	0.7	0.651	0	2
Pten	1.0551e-286	0.714528	0.505	0.376	3.52636e-282	2
Setd5	8.65923e-272	0.685433	0.588	0.504	2.89409e-267	2
Ddx17	6.10006e-237	0.708396	0.565	0.49	2.03876e-232	2
Kmt2e	4.1005e-170	0.588187	0.573	0.535	1.37047e-165	2
Nsd3	3.51156e-165	0.654931	0.524	0.467	1.17363e-160	2
Osbpl9	2.03592e-158	0.736173	0.501	0.451	6.80445e-154	2
Tcf7l2	2.10838e-118	0.630587	0.522	0.489	7.04663e-114	2
Trpc3	0	7.97757	0.956	0.013	0	3
Pdgfrb	0	5.76875	0.904	0.046	0	3
Pde8b	0	8.64121	0.862	0.007	0	3
Ano1	0	6.251	0.825	0.011	0	3
Notch3	0	5.0509	0.866	0.054	0	3
Rgs5	0	5.40683	0.84	0.033	0	3
Gpc61	0	2.44681	0.977	0.187	0	3
Gucy1a21	0	3.94438	0.887	0.111	0	3
Plcl1	0	4.33987	0.962	0.198	0	3
Mdga2	0	7.81384	0.768	0.008	0	3
Myo1b	0	3.69027	0.898	0.15	0	3
Serpini1	0	6.49165	0.745	0.014	0	3
Rerg	0	7.80296	0.735	0.006	0	3
Adgrl3	0	3.57472	0.813	0.092	0	3
Mrvi1	0	4.44872	0.766	0.049	0	3
Ebf21	0	2.55983	0.869	0.156	0	3
Rbms31	0	2.26171	0.943	0.24	0	3
Sox51	0	2.04846	0.872	0.185	0	3
Abcc9	0	4.87112	0.985	0.318	0	3
Lin7a	0	8.38171	0.663	0.003	0	3
Pid11	0	1.77438	0.855	0.198	0	3
Slc24a3	0	4.66131	0.692	0.045	0	3
Morrbid	0	3.73651	0.733	0.092	0	3
Slc12a2	0	4.60007	0.717	0.078	0	3
Dtx3	0	4.51968	0.681	0.05	0	3
Tbc1d1	0	3.53727	0.726	0.098	0	3
Sgip1	0	4.43541	0.664	0.048	0	3
Cacnb4	0	4.88931	0.644	0.029	0	3
Cald1	0	2.61394	0.831	0.216	0	3
Plxdc21	0	1.94874	0.821	0.211	0	3
Gucy1b1	0	4.86088	0.641	0.034	0	3
Nrxn1	0	7.34943	0.612	0.006	0	3
Ppfia2	0	5.04545	0.627	0.03	0	3
Egflam	0	5.26241	0.636	0.042	0	3
Adap2	0	2.95577	0.695	0.108	0	3
Eps8	0	2.91307	0.717	0.136	0	3
Kcnj8	0	8.67861	0.582	0.002	0	3
Ebf12	0	2.19497	0.989	0.422	0	3
Gucy1a1	0	4.13151	0.603	0.04	0	3
Itga11	0	2.07204	0.793	0.231	0	3
Chn1	0	3.70558	0.746	0.186	0	3
Dock6	0	2.80364	0.668	0.134	0	3
Carmn	0	3.66964	0.665	0.134	0	3
Opcml	0	7.1547	0.534	0.007	0	3
Aspn	0	4.59953	0.56	0.034	0	3
Sema5a	0	3.82523	0.582	0.062	0	3
Arhgef17	0	4.28834	0.606	0.093	0	3
Cspg4	0	5.65281	0.535	0.025	0	3
Plxdc1	0	5.42415	0.525	0.019	0	3
Tshz21	0	1.31202	0.832	0.327	0	3
Zeb21	0	1.69364	0.873	0.369	0	3
Map2	0	3.80938	0.553	0.05	0	3
Lhfp1	0	2.08167	0.909	0.407	0	3
Il34	0	6.47855	0.503	0.007	0	3
Nostrin	0	3.03546	0.569	0.079	0	3
Mast41	0	2.85389	0.991	0.504	0	3
4833422C13Rik	0	6.00424	0.504	0.019	0	3
Epb41l21	0	2.06556	0.714	0.235	0	3
Errfi1	0	2.1685	0.574	0.096	0	3
Prkg1	0	3.24639	0.993	0.52	0	3
Sntb1	0	3.17329	0.552	0.086	0	3
Gnb4	0	3.61217	0.526	0.063	0	3
Dennd2a	0	2.94862	0.558	0.097	0	3
Gjc1	0	3.8746	0.552	0.093	0	3
Lsamp1	0	2.30266	0.56	0.105	0	3
Arhgap61	0	2.31193	0.872	0.418	0	3
Sept111	0	2.18385	0.619	0.167	0	3
Plce1	0	2.62938	0.78	0.329	0	3
Limd1	0	3.00085	0.657	0.207	0	3
Pten1	0	2.64473	0.812	0.364	0	3
Ngf1	0	2.07862	0.569	0.123	0	3
Ptprk1	0	2.64555	0.894	0.454	0	3
Maml22	0	1.13537	0.861	0.423	0	3
Trps11	0	1.21913	0.707	0.272	0	3
Fap	0	2.65239	0.519	0.086	0	3
Cacna1a	0	3.5577	0.505	0.077	0	3
Farp1	0	2.30411	0.641	0.214	0	3
Prickle21	0	1.85253	0.621	0.2	0	3
Frmd4b	0	1.28772	0.627	0.214	0	3
Arhgap42	0	2.64988	0.649	0.25	0	3
Nhsl1	0	2.93534	0.585	0.186	0	3
Fbn11	0	1.53533	0.6	0.205	0	3
Pde1a1	0	1.78957	0.526	0.133	0	3
Sh3rf1	0	1.60289	0.601	0.214	0	3
Myh9	0	1.62064	0.618	0.235	0	3
Stard8	0	2.27463	0.564	0.182	0	3
Sema6d	0	2.3578	0.563	0.185	0	3
Ednra	0	2.84302	0.576	0.2	0	3
Art31	0	2.41322	0.673	0.302	0	3
Sparc	0	2.06965	0.503	0.144	0	3
Kcnt21	0	0.740798	0.532	0.178	0	3
Lama21	0	1.23636	0.912	0.568	0	3
Tmod3	0	1.69945	0.544	0.2	0	3
Ror11	0	1.72206	0.719	0.378	0	3
Cdk6	0	2.07047	0.533	0.193	0	3
Cobll11	0	1.86985	0.699	0.38	0	3
Pde3a1	0	1.44092	0.791	0.475	0	3
Ets11	0	0.765865	0.548	0.236	0	3
Frmd4a	0	2.07775	0.623	0.314	0	3
Rapgef51	0	0.957755	0.564	0.256	0	3
Akt32	0	0.849195	0.635	0.329	0	3
Lims1	0	2.06185	0.816	0.511	0	3
Arap2	0	2.31472	0.536	0.235	0	3
Sept7	0	2.05492	0.589	0.288	0	3
Pakap1	0	2.40832	0.557	0.257	0	3
Syne21	0	1.19512	0.551	0.252	0	3
St51	0	1.6413	0.635	0.338	0	3
Rapgef21	0	1.85703	0.879	0.586	0	3
Ano6	0	1.37308	0.561	0.268	0	3
9530026P05Rik	0	1.60899	0.727	0.442	0	3
Dlc1	0	2.78488	0.995	0.714	0	3
Pdzd2	0	1.54345	0.834	0.554	0	3
Kalrn	0	1.647	0.567	0.293	0	3
Grk5	0	1.37197	0.659	0.389	0	3
Igfbp71	0	0.707571	0.501	0.241	0	3
Psd3	0	0.95764	0.833	0.574	0	3
Rora1	0	1.16491	0.96	0.707	0	3
Snrk1	0	1.01449	0.629	0.379	0	3
Cdk141	0	0.980455	0.529	0.28	0	3
Raph1	0	1.59726	0.734	0.49	0	3
Ubr1	0	1.71896	0.54	0.3	0	3
Oxr11	0	0.831102	0.61	0.371	0	3
Pik3ca	0	1.78424	0.536	0.301	0	3
Zfhx3	0	1.04254	0.562	0.33	0	3
Hecw2	0	1.35369	0.569	0.337	0	3
Cyth31	0	1.1568	0.501	0.274	0	3
Zfpm22	0	0.655529	0.818	0.603	0	3
Rasal21	0	1.00016	0.771	0.563	0	3
Pard31	0	1.3579	0.712	0.508	0	3
Creb5	0	1.1298	0.505	0.304	0	3
Pakap.11	0	1.10185	0.67	0.47	0	3
Wdfy3	0	1.21339	0.594	0.394	0	3
Daam1	0	1.54317	0.656	0.465	0	3
Nlk	0	1.33526	0.545	0.357	0	3
Mprip	0	1.22416	0.598	0.41	0	3
Arhgap101	0	1.46094	0.63	0.447	0	3
Airn1	0	1.05801	0.785	0.612	0	3
Rbms11	0	0.990209	0.849	0.696	0	3
Rbpms	0	0.846188	0.809	0.665	0	3
Lpp	0	0.923869	0.76	0.635	0	3
Cped12	0	0.755205	0.779	0.655	0	3
Nbea	0	1.05807	0.676	0.553	0	3
Utrn1	0	0.761378	0.773	0.656	0	3
Nbeal11	0	0.896006	0.684	0.582	0	3
Ssh21	0	0.77797	0.74	0.652	0	3
Maml3	9.48488e-242	1.08564	0.585	0.47	3.17004e-237	3
Phlpp11	1.74833e-236	0.844868	0.601	0.472	5.84327e-232	3
Igf2r1	2.28405e-225	1.18843	0.509	0.355	7.63375e-221	3
Ssbp21	3.4914e-213	1.11972	0.5	0.374	1.1669e-208	3
Map3k201	4.81157e-211	1.15522	0.505	0.391	1.60812e-206	3
Fermt2	4.12207e-205	1.06527	0.535	0.426	1.37768e-200	3
Zfand3	3.57833e-193	0.739812	0.658	0.597	1.19595e-188	3
Itpr11	3.02224e-182	0.639985	0.677	0.6	1.01009e-177	3
Slco3a1	3.79771e-182	1.07444	0.506	0.403	1.26927e-177	3
Herc1	1.48668e-161	0.905163	0.567	0.509	4.96879e-157	3
Inpp4b1	2.50327e-160	0.665148	0.549	0.433	8.36644e-156	3
Rock1	3.59051e-155	0.831306	0.581	0.514	1.20002e-150	3
Eif4g31	6.20366e-155	0.900509	0.531	0.425	2.07339e-150	3
Nf1	3.77422e-151	0.846003	0.551	0.471	1.26142e-146	3
Mef2c1	6.36367e-147	0.618819	0.628	0.54	2.12687e-142	3
Gab11	3.45176e-137	0.910023	0.554	0.479	1.15365e-132	3
Tmcc1	2.00306e-131	0.602113	0.614	0.558	6.69464e-127	3
Nedd4l	2.63235e-117	0.887879	0.515	0.455	8.79785e-113	3
Igf1r1	1.12642e-92	0.581008	0.591	0.539	3.76472e-88	3
Slc9a9	0	6.55258	0.915	0.045	0	4
Mrc1	0	8.08594	0.85	0.006	0	4
Mctp1	0	7.09848	0.85	0.019	0	4
Arhgap15	0	4.99272	0.837	0.031	0	4
F13a1	0	8.78787	0.805	0.004	0	4
Dock2	0	5.50744	0.809	0.012	0	4
Runx1	0	6.58024	0.806	0.013	0	4
Ptprj	0	4.51923	0.868	0.098	0	4
Rbpj	0	6.52562	0.932	0.167	0	4
Pid12	0	3.86226	0.951	0.2	0	4
Ptprc	0	5.65264	0.751	0.011	0	4
Prkcb	0	6.01193	0.739	0.009	0	4
Dab2	0	4.59466	0.844	0.122	0	4
Inpp5d	0	4.39145	0.75	0.064	0	4
Fyb	0	7.17521	0.693	0.007	0	4
Dock8	0	5.58622	0.734	0.051	0	4
Maf	0	6.59442	0.684	0.012	0	4
Frmd4b1	0	3.40412	0.853	0.205	0	4
Pip4k2a	0	3.67991	0.803	0.16	0	4
Aoah	0	7.97485	0.64	0.003	0	4
Ctsc	0	6.47541	0.647	0.017	0	4
Adgre1	0	8.4418	0.631	0.003	0	4
Myo5a	0	4.62917	0.736	0.109	0	4
Stab1	0	5.02205	0.67	0.044	0	4
Bank1	0	5.20585	0.623	0.007	0	4
Tbxas1	0	6.85292	0.621	0.017	0	4
Lyn1	0	2.9698	0.793	0.195	0	4
Rbm47	0	8.06059	0.599	0.003	0	4
Nrros	0	4.88286	0.634	0.038	0	4
Lcp1	0	6.15511	0.612	0.017	0	4
Cfh1	0	2.72865	0.739	0.145	0	4
Apoe	0	4.62307	0.651	0.057	0	4
Myo1f	0	7.28877	0.591	0.005	0	4
Tanc2	0	3.49297	0.81	0.229	0	4
Gm26740	0	6.10278	0.584	0.007	0	4
Csf1r	0	7.37524	0.582	0.005	0	4
Skap2	0	3.40574	0.678	0.104	0	4
Epsti1	0	6.6304	0.565	0.005	0	4
C1qb	0	8.04461	0.562	0.003	0	4
Zeb22	0	3.14766	0.914	0.372	0	4
Tm6sf1	0	4.93113	0.571	0.03	0	4
Iqgap2	0	5.30619	0.55	0.014	0	4
Unc93b1	0	4.74401	0.565	0.035	0	4
Abca9	0	3.2953	0.611	0.093	0	4
Dclre1c	0	5.0526	0.568	0.053	0	4
Cyth4	0	7.46237	0.517	0.003	0	4
Dock10	0	2.87357	0.635	0.123	0	4
March1	0	5.84125	0.519	0.007	0	4
Arhgap22	0	5.9362	0.529	0.019	0	4
Serinc3	0	2.78676	0.706	0.198	0	4
Lyz2	0	7.35164	0.513	0.005	0	4
Pik3ap1	0	7.3601	0.511	0.004	0	4
Lilrb4a	0	7.87497	0.507	0.002	0	4
C1qa	0	7.35953	0.505	0.004	0	4
Taok3	0	3.29271	0.639	0.143	0	4
Elmo11	0	1.74302	0.83	0.336	0	4
Trps12	0	1.86406	0.76	0.274	0	4
Gas7	0	3.96767	0.536	0.053	0	4
Adap21	0	2.53748	0.603	0.121	0	4
Vav32	0	1.86321	0.744	0.269	0	4
Zswim6	0	2.99189	0.712	0.237	0	4
Fam49b	0	3.24383	0.73	0.255	0	4
Camk1d1	0	1.43517	0.936	0.464	0	4
Fli11	0	0.932544	0.763	0.294	0	4
Zfhx31	0	2.66551	0.778	0.318	0	4
Wwp1	0	3.6932	0.722	0.267	0	4
Cmip	0	2.08533	0.678	0.226	0	4
Ap2a2	0	3.54953	0.562	0.116	0	4
Ankrd44	0	2.07897	0.706	0.265	0	4
Ophn1	0	3.23437	0.66	0.221	0	4
Slco2b1	0	3.3962	0.51	0.072	0	4
App1	0	1.85791	0.733	0.319	0	4
Mertk	0	3.03726	0.509	0.096	0	4
Acer3	0	3.2531	0.556	0.15	0	4
Plcl2	0	2.98433	0.603	0.207	0	4
Itsn1	0	3.22559	0.712	0.318	0	4
Atp2b1	0	2.59816	0.765	0.377	0	4
Trerf1	0	2.77181	0.503	0.115	0	4
Rab8b	0	2.70366	0.517	0.135	0	4
Nav12	0	1.42881	0.691	0.309	0	4
Cdk142	0	2.04339	0.644	0.276	0	4
Tgfbr2	0	2.67917	0.523	0.162	0	4
Snx24	0	2.811	0.566	0.205	0	4
Eps151	0	2.10695	0.579	0.219	0	4
Wipf11	0	1.62413	0.611	0.252	0	4
Fnbp1	0	2.53589	0.776	0.421	0	4
Snx2	0	3.12709	0.521	0.166	0	4
Rap1gds1	0	2.25506	0.628	0.276	0	4
Tmcc31	0	2.24162	0.688	0.346	0	4
Rtn4	0	2.2266	0.534	0.193	0	4
Snx29	0	2.53936	0.663	0.322	0	4
Agmo1	0	1.82057	0.52	0.182	0	4
Zdhhc14	0	2.78084	0.649	0.317	0	4
AC149090.1	0	2.26797	0.564	0.244	0	4
Rreb1	0	2.4145	0.793	0.475	0	4
Sh3kbp1	0	2.36299	0.546	0.236	0	4
Dleu2	0	2.0001	0.73	0.422	0	4
Srgap21	0	1.73574	0.724	0.417	0	4
Arhgap181	0	1.18599	0.545	0.24	0	4
Lifr	0	2.62169	0.553	0.251	0	4
Pitpna	0	2.15904	0.542	0.243	0	4
AY0361181	0	0.794669	0.77	0.471	0	4
Cltc	0	2.3431	0.598	0.301	0	4
Mtss1	0	2.18591	0.636	0.341	0	4
Wdfy31	0	1.8465	0.684	0.391	0	4
Rnf169	0	2.0684	0.596	0.304	0	4
Psd31	0	2.30138	0.864	0.575	0	4
Gnaq1	0	1.9196	0.816	0.528	0	4
Hdac91	0	1.29501	0.789	0.502	0	4
Wdfy2	0	2.37361	0.5	0.224	0	4
Dgkd	0	2.08149	0.516	0.241	0	4
Mapk14	0	2.3494	0.55	0.282	0	4
Wasf21	0	1.30424	0.601	0.334	0	4
Tet3	0	2.11813	0.518	0.252	0	4
Ppm1h	0	1.79348	0.54	0.288	0	4
Tmcc11	0	2.16969	0.797	0.547	0	4
Lrmda1	0	1.29597	0.617	0.373	0	4
Enox2	0	2.00208	0.577	0.336	0	4
Slc12a6	0	1.83938	0.528	0.292	0	4
Rnf150	0	2.09866	0.625	0.391	0	4
Mbnl1	0	1.995	0.884	0.659	0	4
Dennd1a	0	1.93518	0.822	0.6	0	4
Actr3	0	1.85248	0.504	0.288	0	4
Etv61	0	1.35195	0.678	0.464	0	4
Man1a1	0	1.82394	0.549	0.335	0	4
Gab21	0	1.0435	0.757	0.549	0	4
Rb1	0	1.57161	0.509	0.305	0	4
Mef2c2	0	1.49658	0.735	0.534	0	4
Iqgap1	0	1.85381	0.536	0.338	0	4
Mitf1	0	1.35233	0.611	0.417	0	4
Zfp710	0	1.72476	0.589	0.396	0	4
Parp8	0	1.73879	0.533	0.344	0	4
Pias1	0	1.71165	0.54	0.355	0	4
Foxp1	0	1.43677	0.844	0.664	0	4
Ppp3ca1	0	1.37056	0.799	0.621	0	4
Atxn7l1	0	1.67511	0.509	0.342	0	4
Picalm1	0	1.19604	0.685	0.52	0	4
Mef2a	0	1.38667	0.759	0.618	0	4
Tbc1d5	0	1.31116	0.699	0.57	0	4
Foxn3	0	1.16711	0.75	0.646	0	4
Tmem164	2.59524e-304	1.46044	0.515	0.326	8.6738e-300	4
Uvrag	1.11873e-298	1.39522	0.564	0.407	3.73901e-294	4
Fam172a1	1.49788e-264	1.14068	0.627	0.492	5.00621e-260	4
Btbd9	2.07351e-262	1.21683	0.596	0.477	6.9301e-258	4
Vps13b	9.69018e-250	1.21691	0.608	0.523	3.23865e-245	4
Tacc11	1.66242e-232	1.17097	0.5	0.302	5.55614e-228	4
Fchsd2	6.20878e-210	1.45508	0.508	0.376	2.0751e-205	4
Wnk1	2.54099e-195	0.91175	0.67	0.604	8.4925e-191	4
Ext11	2.69536e-195	0.719783	0.76	0.69	9.00843e-191	4
Diaph21	2.22709e-189	0.764483	0.713	0.668	7.44339e-185	4
Exoc6b1	5.92506e-186	1.01954	0.6	0.506	1.98027e-181	4
Anks1	3.61942e-173	1.31313	0.504	0.407	1.20968e-168	4
Abi1	3.25901e-168	1.12137	0.507	0.366	1.08923e-163	4
Fcho21	1.07259e-162	0.972296	0.564	0.449	3.58482e-158	4
Pan31	1.32956e-134	0.876561	0.584	0.522	4.44366e-130	4
Sbf21	1.96215e-129	0.776388	0.644	0.628	6.5579e-125	4
Exoc4	7.01315e-128	0.74865	0.668	0.648	2.34394e-123	4
Jmjd1c	1.58469e-121	0.853292	0.598	0.559	5.29634e-117	4
Ankrd11	1.93802e-117	0.817769	0.604	0.588	6.47725e-113	4
Mycbp2	1.42213e-116	0.864867	0.589	0.568	4.75305e-112	4
Rsrp11	2.89881e-114	0.815452	0.565	0.501	9.6884e-110	4
Osbpl91	9.80718e-114	1.38312	0.506	0.456	3.27775e-109	4
Eif4g32	2.1062e-110	0.923463	0.516	0.428	7.03934e-106	4
Chd91	1.39078e-109	0.800289	0.602	0.578	4.64827e-105	4
Ssh22	1.35234e-98	0.718403	0.66	0.658	4.51979e-94	4
Immp2l1	5.42286e-73	0.88253	0.515	0.436	1.81243e-68	4
Kansl1	3.49179e-54	0.581244	0.611	0.621	1.16703e-49	4
Phf21a1	1.94976e-51	0.68749	0.54	0.525	6.5165e-47	4
Lrch11	4.57351e-46	0.690852	0.501	0.48	1.52856e-41	4
Ncoa2	1.15152e-35	0.673727	0.514	0.528	3.84862e-31	4
St6galnac31	0	3.17459	0.867	0.172	0	5
Ptprb1	0	2.34311	0.893	0.202	0	5
Ldb21	0	3.38122	0.874	0.184	0	5
Vegfc	0	4.28257	0.782	0.1	0	5
Flt11	0	1.99204	0.872	0.213	0	5
Plcb11	0	2.3029	0.862	0.226	0	5
Mecom2	0	3.01232	0.969	0.343	0	5
Rasgrf21	0	3.06867	0.735	0.128	0	5
Cyyr11	0	1.9133	0.789	0.209	0	5
Pdgfd1	0	3.04295	0.906	0.338	0	5
Pcsk5	0	5.17322	0.618	0.058	0	5
Arhgap311	0	1.88564	0.852	0.3	0	5
Lama3	0	5.69501	0.55	0.023	0	5
Pecam11	0	2.19373	0.702	0.179	0	5
Samd121	0	2.72508	0.649	0.135	0	5
Prex22	0	1.92829	0.859	0.367	0	5
Dock91	0	1.80316	0.738	0.247	0	5
Apba1	0	3.08676	0.621	0.133	0	5
Ebf13	0	1.45917	0.938	0.455	0	5
Myo101	0	2.37301	0.718	0.239	0	5
Eng1	0	2.15533	0.673	0.199	0	5
Epas1	0	2.60816	0.747	0.275	0	5
Egfl71	0	1.66967	0.645	0.175	0	5
Efnb2	0	3.32656	0.54	0.072	0	5
Adgrf51	0	1.54741	0.678	0.213	0	5
Fgd51	0	2.2432	0.612	0.147	0	5
Adgrl41	0	1.19524	0.665	0.205	0	5
Itpkb1	0	1.45739	0.747	0.287	0	5
Rgs3	0	2.86413	0.566	0.106	0	5
Unc13b	0	2.63789	0.594	0.137	0	5
Dnm31	0	1.9956	0.637	0.195	0	5
Timp3	0	2.39811	0.664	0.223	0	5
Arl151	0	3.67073	0.958	0.53	0	5
Podxl	0	2.48561	0.53	0.108	0	5
Cav11	0	1.83545	0.578	0.156	0	5
Myo1e	0	2.16163	0.632	0.211	0	5
Mcc1	0	1.69946	0.671	0.251	0	5
Sncaip	0	2.39796	0.527	0.108	0	5
Cdk19	0	3.30902	0.625	0.216	0	5
Arhgef28	0	2.87011	0.51	0.11	0	5
Lims21	0	1.61125	0.584	0.185	0	5
Fryl	0	2.44869	0.793	0.413	0	5
Map4k31	0	2.19827	0.759	0.392	0	5
Heg12	0	2.14752	0.884	0.547	0	5
Ptprg1	0	1.5567	0.958	0.7	0	5
Ptprm1	0	1.76648	0.972	0.725	0	5
Klf121	0	1.92022	0.809	0.567	0	5
Utrn2	0	1.95488	0.895	0.66	0	5
Rapgef11	2.21283e-293	1.78858	0.746	0.401	7.39573e-289	5
Apbb21	7.80096e-275	1.34852	0.845	0.603	2.60724e-270	5
Dach11	4.25806e-272	1.61483	0.686	0.263	1.42313e-267	5
Nxpe41	1.20009e-271	1.67283	0.508	0.171	4.01095e-267	5
Kitl1	1.0426e-270	1.60602	0.643	0.231	3.48458e-266	5
Lrrc8c1	1.15051e-262	1.65179	0.56	0.201	3.84524e-258	5
Magi11	5.65219e-255	1.27463	0.836	0.559	1.88908e-250	5
Elmo12	3.26779e-250	1.28779	0.751	0.36	1.09216e-245	5
Shank31	6.39086e-250	1.29882	0.556	0.186	2.13595e-245	5
Elk31	7.37402e-239	1.47181	0.566	0.21	2.46454e-234	5
Mgll1	5.67239e-238	1.75796	0.594	0.217	1.89583e-233	5
Actn4	9.97407e-238	2.30184	0.593	0.271	3.33353e-233	5
Tek1	9.70593e-228	1.57315	0.529	0.2	3.24392e-223	5
Tspan71	1.104e-225	1.65936	0.526	0.177	3.68978e-221	5
Slc6a6	1.44692e-224	2.29146	0.594	0.267	4.83589e-220	5
Cdk171	7.37696e-224	1.83425	0.62	0.282	2.46553e-219	5
Tanc11	1.30187e-219	1.62883	0.691	0.378	4.35112e-215	5
Nxn	1.19462e-215	1.60638	0.541	0.204	3.99267e-211	5
Plekhg11	3.33428e-215	1.65127	0.606	0.263	1.11438e-210	5
Gulp11	7.81323e-215	1.52312	0.559	0.231	2.61134e-210	5
Fbxl72	9.4711e-209	1.3182	0.698	0.34	3.16543e-204	5
Prkch1	1.96997e-208	1.07898	0.591	0.227	6.58402e-204	5
Plcb41	2.95534e-204	0.995188	0.802	0.483	9.87732e-200	5
Adarb1	4.12532e-200	2.09838	0.509	0.216	1.37876e-195	5
Etl41	2.72434e-187	1.13824	0.752	0.452	9.10529e-183	5
Rapgef4	4.11652e-185	1.95743	0.576	0.309	1.37582e-180	5
Rapgef22	2.15602e-184	1.19656	0.789	0.604	7.20586e-180	5
Myo1d1	1.78513e-183	1.39696	0.569	0.233	5.96627e-179	5
Cdc42bpa	3.09685e-183	1.78114	0.632	0.379	1.03503e-178	5
Galnt181	1.29455e-179	1.38692	0.582	0.264	4.32664e-175	5
Clic41	6.66799e-176	2.1247	0.635	0.397	2.22858e-171	5
Tmod31	1.51499e-169	1.6852	0.532	0.22	5.06339e-165	5
Sema6a1	8.35733e-169	0.910858	0.572	0.247	2.79319e-164	5
Fli12	9.78512e-168	0.752115	0.683	0.316	3.27038e-163	5
Lima11	7.31878e-167	1.94027	0.556	0.29	2.44608e-162	5
Ablim12	1.59133e-162	1.04011	0.866	0.655	5.31854e-158	5
Cmip1	1.8806e-159	1.35306	0.537	0.248	6.28533e-155	5
Mast42	5.18549e-158	0.77131	0.829	0.534	1.7331e-153	5
Fbn12	3.08174e-157	1.195	0.506	0.229	1.02998e-152	5
Ptk21	7.09296e-154	1.29088	0.703	0.461	2.37061e-149	5
Hip1	1.6736e-153	1.51192	0.591	0.324	5.59351e-149	5
Plxna21	9.76367e-148	1.51438	0.631	0.401	3.26322e-143	5
Akt33	6.75955e-147	1.08269	0.647	0.346	2.25918e-142	5
Nebl1	5.45438e-142	2.15163	0.541	0.367	1.82296e-137	5
Rapgef52	1.7525e-139	1.18474	0.572	0.274	5.85721e-135	5
Gnaq2	4.83095e-139	1.18114	0.721	0.543	1.6146e-134	5
Ralgapa11	6.44465e-138	1.19898	0.733	0.613	2.15393e-133	5
4931406P16Rik1	1.17505e-137	1.48604	0.561	0.302	3.92727e-133	5
Itga12	3.32347e-137	1.2468	0.586	0.266	1.11077e-132	5
Dock11	1.73128e-136	1.15886	0.7	0.481	5.78629e-132	5
Nedd91	4.84666e-129	1.57935	0.534	0.273	1.61985e-124	5
Tmcc32	3.53032e-123	1.18361	0.624	0.362	1.1799e-118	5
Tcf41	4.35046e-123	0.65586	0.876	0.612	1.45401e-118	5
AY0361182	3.39313e-121	0.862381	0.759	0.484	1.13405e-116	5
Ttc282	2.29126e-120	1.15027	0.689	0.461	7.65786e-116	5
Stox21	3.32724e-120	0.999799	0.688	0.484	1.11203e-115	5
Ets12	1.204e-115	1.1875	0.504	0.254	4.02401e-111	5
Maml23	1.655e-110	0.821021	0.749	0.45	5.53135e-106	5
App2	5.75758e-110	0.93509	0.619	0.339	1.9243e-105	5
Plxna4	1.57895e-109	1.57498	0.562	0.387	5.27716e-105	5
Ccny1	3.80678e-108	1.37179	0.601	0.415	1.2723e-103	5
Klf71	1.71128e-106	1.22479	0.616	0.385	5.71945e-102	5
Pitpnc11	2.30051e-103	0.993091	0.71	0.552	7.68876e-99	5
Foxp11	5.01226e-101	0.934759	0.753	0.673	1.6752e-96	5
Kalrn1	5.98e-101	1.41381	0.52	0.309	1.99863e-96	5
Afdn1	4.20769e-97	1.18475	0.584	0.38	1.40629e-92	5
Syne11	3.01255e-96	1.07798	0.67	0.513	1.00686e-91	5
Myh91	8.26397e-93	1.32502	0.501	0.259	2.76198e-88	5
Syne22	1.83748e-92	1.15842	0.519	0.269	6.14122e-88	5
Oxr12	4.03987e-90	1.11966	0.598	0.385	1.3502e-85	5
Numb1	7.25434e-86	1.41708	0.559	0.378	2.42455e-81	5
Gm424181	1.11879e-83	0.743546	0.905	0.695	3.73922e-79	5
Luzp1	1.9464e-82	1.33467	0.525	0.339	6.50526e-78	5
Sgms11	4.49706e-82	1.1289	0.642	0.543	1.50301e-77	5
Picalm2	3.6935e-81	1.11889	0.657	0.528	1.23444e-76	5
Bmpr2	4.39237e-72	1.41644	0.503	0.337	1.46802e-67	5
Stard13	9.71476e-60	1.34539	0.512	0.394	3.24687e-55	5
Rbfox2	1.98415e-57	0.918938	0.654	0.594	6.63142e-53	5
Diaph22	1.44826e-51	0.88659	0.691	0.67	4.84038e-47	5
9530026P05Rik1	8.82093e-45	1.06105	0.555	0.461	2.94813e-40	5
Rftn11	2.82906e-44	0.769765	0.561	0.442	9.45528e-40	5
Cped13	1.65762e-41	0.655257	0.697	0.664	5.5401e-37	5
Wasf22	9.23482e-37	0.784983	0.502	0.348	3.08646e-32	5
Srgap22	4.04623e-36	0.724646	0.559	0.434	1.35233e-31	5
Stag12	4.49088e-33	0.732109	0.607	0.529	1.50094e-28	5
Snrk2	1.06552e-31	0.8142	0.512	0.395	3.56117e-27	5
Camk1d2	1.0614e-29	0.61283	0.639	0.49	3.54741e-25	5
Lrch12	7.72206e-28	0.84824	0.529	0.48	2.58087e-23	5
Foxn31	1.1925e-26	0.584981	0.67	0.652	3.98558e-22	5
Mef2c3	2.89e-23	0.598264	0.594	0.546	9.65896e-19	5
Peak11	7.71006e-22	0.656905	0.599	0.576	2.57686e-17	5
Ldlrad41	1.0748e-20	0.791607	0.55	0.508	3.5922e-16	5
Nbea1	4.4277e-20	0.653549	0.569	0.562	1.47983e-15	5
Tmem108	0	7.89429	0.923	0.05	0	6
Chrm3	0	6.25755	0.894	0.034	0	6
Npr3	0	9.10084	0.819	0.011	0	6
Cgnl1	0	5.05731	0.923	0.122	0	6
Cdh11	0	7.08227	0.809	0.032	0	6
Cfh2	0	3.76623	0.929	0.17	0	6
Vwf	0	5.68885	0.762	0.02	0	6
Unc13b1	0	3.70079	0.86	0.135	0	6
Sncaip1	0	4.06501	0.808	0.105	0	6
Pecam12	0	2.66457	0.863	0.179	0	6
Kcnt22	0	2.77701	0.859	0.194	0	6
Emcn1	0	2.67928	0.817	0.16	0	6
Csgalnact1	0	3.03203	0.827	0.174	0	6
Acer2	0	4.4154	0.7	0.069	0	6
Eng2	0	2.56148	0.826	0.198	0	6
Gmds	0	3.39218	0.905	0.279	0	6
Rasgef1b	0	5.19349	0.748	0.125	0	6
Smoc1	0	8.72432	0.622	0.003	0	6
Wdr17	0	6.06882	0.636	0.024	0	6
Cemip2	0	4.99257	0.669	0.064	0	6
Rgs31	0	3.33136	0.708	0.106	0	6
Nrg1	0	9.71223	0.6	0.009	0	6
Tmtc21	0	2.54881	0.764	0.185	0	6
Col4a4	0	3.54933	0.67	0.092	0	6
Mecom3	0	1.82749	0.918	0.346	0	6
Nxn1	0	2.47079	0.765	0.202	0	6
Mgp	0	2.7017	0.654	0.101	0	6
Bace2	0	5.71886	0.574	0.021	0	6
Spon1	0	2.94483	0.661	0.111	0	6
Gpm6a	0	6.57734	0.55	0.006	0	6
Eps81	0	2.54488	0.713	0.171	0	6
Pkhd1l1	0	6.43044	0.544	0.007	0	6
Samd122	0	1.968	0.665	0.136	0	6
Flrt2	0	4.74664	0.584	0.055	0	6
Ptpn14	0	3.39973	0.781	0.253	0	6
Sox52	0	1.89106	0.756	0.228	0	6
Dock92	0	1.55093	0.775	0.248	0	6
Elmo13	0	1.6142	0.884	0.359	0	6
Stxbp6	0	2.28199	0.708	0.187	0	6
Hmcn11	0	3.88278	0.968	0.448	0	6
Bmx	0	6.53261	0.528	0.008	0	6
Car8	0	2.36317	0.636	0.124	0	6
Rps6ka2	0	4.46194	0.715	0.218	0	6
Entpd1	0	2.64594	0.591	0.096	0	6
St6galnac32	0	1.3631	0.664	0.177	0	6
Greb1l	0	3.41654	0.552	0.068	0	6
Bmp61	0	2.68721	0.674	0.191	0	6
Itgbl11	0	2.73082	0.572	0.089	0	6
Thsd4	0	3.26787	0.685	0.204	0	6
Dennd5b1	0	2.46113	0.797	0.317	0	6
Ece1	0	2.4749	0.617	0.14	0	6
Dock61	0	1.91731	0.642	0.166	0	6
Erg1	0	2.06212	0.608	0.132	0	6
Cdc14a	0	3.41453	0.563	0.088	0	6
Cpe	0	3.33466	0.657	0.195	0	6
Epha7	0	5.82237	0.538	0.077	0	6
Tmcc33	0	2.2061	0.82	0.36	0	6
Col5a21	0	2.30798	0.598	0.141	0	6
Il6st	0	2.8799	0.658	0.203	0	6
Tmem1641	0	2.96542	0.782	0.332	0	6
Tm4sf1	0	2.70736	0.532	0.088	0	6
Col4a3	0	3.69866	0.5	0.063	0	6
Palm	0	2.79019	0.524	0.091	0	6
Pgm51	0	3.21617	0.694	0.261	0	6
Plxna41	0	2.52768	0.813	0.384	0	6
Kank1	0	3.24131	0.601	0.186	0	6
Atp1b3	0	3.15936	0.52	0.106	0	6
Prkg11	0	1.75564	0.961	0.548	0	6
Fgd52	0	1.43915	0.56	0.149	0	6
Parp81	0	2.16098	0.751	0.35	0	6
Heg13	0	2.4277	0.946	0.547	0	6
Meis21	0	2.40204	0.825	0.447	0	6
Setbp12	0	1.99624	0.84	0.49	0	6
Tmtc1	0	2.23324	0.823	0.476	0	6
Foxp12	0	2.00351	0.958	0.67	0	6
Ppp3ca2	0	1.96763	0.909	0.628	0	6
Cped14	0	1.78011	0.925	0.661	0	6
Rapgef53	8.53286e-308	1.71867	0.753	0.272	2.85185e-303	6
Pde3a2	1.86195e-305	1.93927	0.845	0.493	6.223e-301	6
Arhgap312	4.10686e-295	1.2834	0.819	0.303	1.37259e-290	6
Flt12	1.01463e-280	0.632978	0.728	0.218	3.39108e-276	6
Shank32	4.37781e-274	1.17441	0.639	0.186	1.46315e-269	6
Acvr1	1.66004e-271	2.40835	0.601	0.22	5.5482e-267	6
Plcb12	1.6273e-263	0.927022	0.749	0.229	5.43876e-259	6
Tek2	2.90118e-258	1.51285	0.607	0.2	9.69631e-254	6
Zfp5211	5.02484e-249	1.68712	0.803	0.488	1.6794e-244	6
Rsu1	8.92427e-248	1.86837	0.702	0.315	2.98267e-243	6
Rdx	2.47685e-244	2.49265	0.554	0.186	8.27814e-240	6
Prkch2	1.55525e-228	0.997659	0.676	0.227	5.19796e-224	6
Phldb2	6.83105e-221	1.93608	0.65	0.298	2.28307e-216	6
Adgrf52	5.4722e-217	0.795213	0.641	0.215	1.82892e-212	6
Maml24	5.83537e-216	1.22325	0.879	0.449	1.9503e-211	6
Bmpr21	1.57739e-215	1.88777	0.683	0.335	5.27197e-211	6
Itpr2	1.6737e-214	1.63694	0.734	0.416	5.59383e-210	6
Crim1	1.57834e-211	1.8479	0.703	0.368	5.27513e-207	6
Nfib1	4.20375e-205	1.10283	0.912	0.726	1.40498e-200	6
Sntb21	3.68863e-199	1.61943	0.561	0.191	1.23281e-194	6
St3gal4	1.32255e-196	2.09165	0.554	0.213	4.42023e-192	6
Sp100	1.28951e-195	1.28721	0.59	0.222	4.30981e-191	6
Fgf141	1.13633e-183	2.35874	0.595	0.26	3.79783e-179	6
Egfl72	1.06266e-176	0.866573	0.517	0.178	3.55164e-172	6
Flnb	1.42695e-174	1.25829	0.504	0.161	4.76915e-170	6
Rhoj1	5.32876e-173	0.990902	0.677	0.291	1.78098e-168	6
Tshz22	5.19155e-166	0.791439	0.781	0.358	1.73512e-161	6
Pde7b1	8.31614e-163	1.76857	0.692	0.402	2.77942e-158	6
Nfia1	1.35698e-159	0.95144	0.921	0.795	4.53529e-155	6
March3	1.27572e-155	2.28732	0.573	0.29	4.26371e-151	6
Itga9	3.79566e-155	1.91768	0.564	0.28	1.26858e-150	6
Pkp41	3.11644e-152	1.48544	0.682	0.409	1.04158e-147	6
Tanc12	9.66554e-150	1.162	0.707	0.379	3.23042e-145	6
Gnaq3	1.3845e-149	1.06995	0.803	0.542	4.62729e-145	6
Hand2os11	1.65683e-148	2.1655	0.508	0.243	5.53745e-144	6
Ralgapa21	1.54242e-145	1.35676	0.778	0.467	5.15509e-141	6
Aplp2	1.61712e-137	1.64611	0.545	0.231	5.40473e-133	6
Smg6	8.19154e-132	1.39993	0.714	0.496	2.73778e-127	6
Gls1	1.35474e-129	1.60132	0.606	0.297	4.52782e-125	6
Dock41	3.56938e-129	0.949927	0.768	0.483	1.19296e-124	6
Dapk1	1.01401e-128	1.66737	0.574	0.318	3.38902e-124	6
Hdac7	4.82938e-120	1.39039	0.54	0.237	1.61407e-115	6
Mat2a	6.96261e-119	1.76403	0.589	0.334	2.32704e-114	6
Rbms12	2.34325e-113	0.836087	0.863	0.704	7.83159e-109	6
Syne23	8.75715e-112	0.966818	0.604	0.269	2.92681e-107	6
Akt34	4.2438e-110	0.873796	0.674	0.347	1.41836e-105	6
App3	2.4571e-102	0.726576	0.679	0.339	8.21213e-98	6
Myo1d2	6.01734e-102	0.733862	0.547	0.235	2.01112e-97	6
Tcf7l11	2.9124e-101	1.21807	0.57	0.304	9.73381e-97	6
Ttc283	2.79471e-96	0.863201	0.734	0.461	9.34047e-92	6
Tspan9	8.43778e-93	1.10066	0.532	0.265	2.82008e-88	6
Sh3rf11	6.11201e-92	0.96914	0.503	0.239	2.04276e-87	6
Pard32	4.70528e-91	0.979223	0.712	0.521	1.5726e-86	6
Man2a1	1.3715e-89	1.56067	0.575	0.359	4.58384e-85	6
Afap1l1	1.31607e-87	1.30261	0.507	0.271	4.39855e-83	6
Fryl1	1.11649e-86	1.03927	0.635	0.416	3.73152e-82	6
Mcu	6.94687e-86	1.42778	0.524	0.307	2.32178e-81	6
Sgms12	8.59699e-86	0.828767	0.724	0.542	2.87329e-81	6
Rere	1.83576e-85	0.815903	0.796	0.669	6.13548e-81	6
Fbxl73	8.0568e-78	0.774996	0.617	0.342	2.69274e-73	6
Stk3	7.80252e-75	1.03297	0.579	0.352	2.60776e-70	6
Sash11	5.46508e-72	0.899493	0.582	0.323	1.82654e-67	6
Pam1	6.48018e-69	1.09977	0.694	0.54	2.16581e-64	6
Phf21a2	1.66143e-64	0.878142	0.68	0.524	5.55283e-60	6
Mbnl11	3.9157e-63	0.711853	0.778	0.671	1.3087e-58	6
Fchsd21	4.96621e-62	0.990248	0.559	0.381	1.65981e-57	6
4931406P16Rik2	8.1707e-61	0.83882	0.526	0.303	2.73081e-56	6
Etv62	6.07995e-60	0.623456	0.683	0.475	2.03204e-55	6
Zmiz1	6.50158e-59	1.08418	0.597	0.437	2.17296e-54	6
Pbx11	8.14544e-57	0.772466	0.799	0.65	2.72237e-52	6
Rasal22	2.97683e-54	0.668978	0.724	0.576	9.94916e-50	6
Diaph23	4.55329e-52	0.617828	0.772	0.669	1.5218e-47	6
Cd2ap	2.20326e-49	1.01774	0.551	0.411	7.36374e-45	6
Zfr	9.211e-46	1.01805	0.572	0.447	3.0785e-41	6
Ogt1	6.50896e-45	0.887387	0.613	0.483	2.17542e-40	6
Airn2	3.03132e-44	0.907407	0.681	0.624	1.01313e-39	6
Baz2b1	6.24821e-44	0.618632	0.73	0.633	2.08828e-39	6
Wwtr11	3.34095e-43	0.759011	0.556	0.391	1.11661e-38	6
Ube2h	2.07983e-42	0.950536	0.584	0.459	6.9512e-38	6
Ltbp11	1.52415e-40	1.4066	0.522	0.403	5.094e-36	6
Rbfox21	3.34694e-40	0.649222	0.683	0.594	1.11861e-35	6
Numb2	2.61307e-37	0.794489	0.54	0.378	8.7334e-33	6
Arhgef31	7.41954e-36	0.667569	0.593	0.459	2.47976e-31	6
Ppp1r12a	1.775e-34	0.622869	0.651	0.563	5.93239e-30	6
Agap1	1.89853e-33	0.755358	0.582	0.467	6.34526e-29	6
Ankrd12	1.01517e-32	0.714224	0.537	0.404	3.3929e-28	6
Spag91	5.97421e-31	0.635859	0.67	0.59	1.9967e-26	6
Sptan1	1.26764e-30	0.728365	0.517	0.39	4.23672e-26	6
Abi11	1.14247e-29	0.722567	0.513	0.373	3.81838e-25	6
Gphn1	1.20244e-28	0.606146	0.785	0.745	4.01878e-24	6
Ttc3	2.93839e-28	0.812036	0.508	0.405	9.82069e-24	6
Lama42	4.23749e-27	0.622783	0.549	0.411	1.41625e-22	6
Ddx171	1.54756e-24	0.610527	0.596	0.501	5.17227e-20	6
Lars2	4.66153e-19	0.732014	0.5	0.345	1.55798e-14	6
Btbd91	1.926e-18	0.58522	0.547	0.483	6.43706e-14	6
Nrp11	4.53972e-17	0.789789	0.689	0.66	1.51727e-12	6
Smyd3	2.08169e-12	0.609292	0.528	0.476	6.95741e-08	6
Myh11	0	10.1335	0.943	0.005	0	7
Dgkb	0	6.7571	0.963	0.038	0	7
Kcnab1	0	8.50077	0.918	0.019	0	7
Notch31	0	3.72847	0.904	0.102	0	7
Mrvi11	0	3.81828	0.865	0.091	0	7
Mylk	0	4.84883	0.818	0.06	0	7
Sox53	0	2.69134	0.963	0.225	0	7
Sntb11	0	4.17111	0.835	0.111	0	7
Acta2	0	7.81144	0.733	0.01	0	7
Gucy1a11	0	3.89818	0.775	0.072	0	7
Gpc62	0	1.78266	0.938	0.235	0	7
Slc38a11	0	9.00419	0.702	0.002	0	7
Cald11	0	3.15644	0.945	0.251	0	7
Flna	0	4.20894	0.795	0.112	0	7
Carmn1	0	4.01407	0.823	0.164	0	7
Lmod1	0	9.05656	0.642	0.002	0	7
Cabp1	0	4.83124	0.669	0.037	0	7
Olfr78	0	11.8578	0.611	0	0	7
Rasl12	0	4.25789	0.649	0.041	0	7
Rbms32	0	1.19261	0.885	0.283	0	7
Plcl11	0	1.90091	0.847	0.246	0	7
Gucy1a22	0	2.3496	0.76	0.16	0	7
Mamdc2	0	5.39541	0.619	0.028	0	7
Ccdc3	0	8.11507	0.584	0.004	0	7
Wtip	0	4.59508	0.592	0.036	0	7
Plekhg3	0	3.15925	0.658	0.103	0	7
Cacnb41	0	3.4919	0.618	0.066	0	7
Slit31	0	2.47773	0.675	0.123	0	7
Itga8	0	4.46763	0.592	0.045	0	7
Map21	0	3.31203	0.626	0.08	0	7
Actn1	0	3.86938	0.652	0.107	0	7
Pde1a2	0	2.35188	0.696	0.154	0	7
Ano11	0	3.46393	0.603	0.063	0	7
Tagln	0	8.23947	0.543	0.003	0	7
Mark1	0	4.62255	0.595	0.056	0	7
Sema5a1	0	3.00573	0.629	0.093	0	7
Entpd11	0	2.97422	0.628	0.096	0	7
Ctnna31	0	1.85126	0.935	0.411	0	7
Frmd4b2	0	1.79154	0.757	0.237	0	7
Errfi11	0	1.92856	0.635	0.124	0	7
Kalrn2	0	2.80808	0.816	0.306	0	7
Ebf22	0	1.39791	0.708	0.202	0	7
Serpini11	0	2.80693	0.565	0.061	0	7
Plce11	0	3.10262	0.859	0.355	0	7
Tbc1d11	0	2.2901	0.639	0.137	0	7
Zfhx32	0	2.30521	0.84	0.34	0	7
Atp2b4	0	2.87899	0.597	0.099	0	7
Cacnb21	0	1.79392	0.922	0.427	0	7
Mertk1	0	2.67356	0.607	0.114	0	7
Daam2	0	3.71732	0.54	0.052	0	7
Rbpms2	0	3.88926	0.6	0.117	0	7
Ppm1e	0	3.73391	0.641	0.158	0	7
Tbx2	0	4.43009	0.505	0.027	0	7
Ngf2	0	2.02857	0.624	0.149	0	7
Pdlim3	0	3.49538	0.58	0.108	0	7
Pde3a3	0	2.73115	0.963	0.492	0	7
Synpo21	0	2.50712	0.859	0.389	0	7
Zbtb7c	0	2.14893	0.611	0.143	0	7
Rcan21	0	1.87843	0.869	0.402	0	7
Gucy1b11	0	2.96501	0.536	0.071	0	7
Trpc31	0	0.917338	0.54	0.076	0	7
Chrm31	0	3.08041	0.503	0.039	0	7
P3h2	0	3.26799	0.52	0.058	0	7
Dgkg	0	5.48039	0.506	0.045	0	7
Rgs7bp	0	4.44536	0.515	0.055	0	7
Itpk1	0	4.0197	0.518	0.06	0	7
Cap21	0	2.70303	0.771	0.314	0	7
Gjc11	0	2.77696	0.574	0.12	0	7
Mast43	0	2.19159	0.981	0.533	0	7
Mcam	0	3.26128	0.503	0.056	0	7
Pdgfrb1	0	1.77657	0.544	0.102	0	7
Prkg12	0	2.95454	0.989	0.548	0	7
Ntn4	0	3.47044	0.527	0.088	0	7
Map1b	0	2.89084	0.523	0.086	0	7
Adcy5	0	3.76782	0.552	0.122	0	7
Olfr1033	0	2.699	0.598	0.169	0	7
Map3k202	0	2.40176	0.799	0.394	0	7
Cobll12	0	2.07036	0.799	0.398	0	7
Wnt5b	0	3.78694	0.529	0.13	0	7
Thsd41	0	3.37879	0.604	0.205	0	7
Ctdspl	0	2.23855	0.502	0.109	0	7
Adcy9	0	2.33337	0.73	0.339	0	7
Ppp1r12a1	0	2.71145	0.903	0.56	0	7
Fry1	0	1.8661	0.932	0.619	0	7
Lpp1	0	2.35529	0.914	0.641	0	7
Rbpms1	0	1.83491	0.942	0.672	0	7
Dlc11	0	1.25284	0.975	0.732	0	7
Farp11	2.30807e-288	1.92766	0.682	0.239	7.71404e-284	7
Dock101	2.20472e-284	1.53067	0.54	0.149	7.3686e-280	7
Arhgap62	1.88168e-279	1.70719	0.832	0.446	6.28894e-275	7
Ebf14	1.82232e-267	1.1	0.955	0.457	6.09056e-263	7
Myo1d3	4.23492e-264	1.66253	0.686	0.233	1.4154e-259	7
Msrb31	1.00224e-258	2.02802	0.771	0.469	3.34967e-254	7
Crim11	6.16307e-257	2.50216	0.728	0.368	2.05982e-252	7
Lrrtm31	1.9056e-253	2.186	0.671	0.29	6.3689e-249	7
St6gal1	7.9705e-246	2.04774	0.583	0.204	2.6639e-241	7
Hip11	3.35892e-233	1.70094	0.719	0.323	1.12262e-228	7
Igfbp72	1.20039e-230	1.36466	0.674	0.254	4.01194e-226	7
Syne24	7.78665e-223	1.60782	0.691	0.268	2.60245e-218	7
Rock11	1.95827e-221	1.72884	0.781	0.515	6.54493e-217	7
Crtc31	2.814e-221	2.10103	0.655	0.308	9.40496e-217	7
Myh92	1.47681e-220	1.49242	0.685	0.257	4.93578e-216	7
Epn2	9.81999e-213	1.90953	0.577	0.205	3.28204e-208	7
Utrn3	8.20545e-212	1.51797	0.86	0.661	2.74243e-207	7
Camk2g	7.65656e-203	2.49312	0.563	0.238	2.55898e-198	7
Tsc22d1	1.18329e-202	2.14217	0.527	0.165	3.9548e-198	7
Fchsd22	7.87154e-201	1.79033	0.706	0.38	2.63083e-196	7
Ppm1l1	2.89189e-200	2.53758	0.596	0.285	9.66526e-196	7
Actn41	5.05581e-200	2.04455	0.627	0.272	1.68975e-195	7
Itpr12	2.23947e-197	1.4253	0.822	0.602	7.48475e-193	7
Lhfp2	9.3787e-196	1.18558	0.805	0.438	3.13455e-191	7
Maml31	2.52673e-193	1.63922	0.761	0.474	8.44483e-189	7
Sorbs21	8.44712e-188	1.82538	0.752	0.419	2.8232e-183	7
Phldb21	7.77909e-181	2.1334	0.613	0.298	2.59993e-176	7
St52	1.1501e-176	1.70002	0.686	0.355	3.84386e-172	7
Filip11	7.89035e-175	1.69688	0.754	0.501	2.63711e-170	7
Rap1a	3.46606e-172	1.76015	0.654	0.32	1.15842e-167	7
Lrch13	4.12829e-171	1.55726	0.736	0.478	1.37976e-166	7
Dmd1	5.88812e-169	1.05626	0.868	0.405	1.96793e-164	7
Itga13	6.67667e-168	1.1993	0.682	0.266	2.23148e-163	7
Rgs61	5.00283e-166	1.31691	0.685	0.37	1.67205e-161	7
Pls3	3.32043e-165	1.95844	0.553	0.243	1.10975e-160	7
Ednra1	2.17402e-164	2.03045	0.523	0.224	7.26599e-160	7
Syne12	1.10455e-163	1.19531	0.79	0.512	3.69162e-159	7
Myom11	8.21423e-162	1.61396	0.627	0.304	2.74536e-157	7
Mical2	1.97604e-161	2.37554	0.567	0.287	6.60432e-157	7
Tpm11	2.47646e-155	1.1911	0.795	0.468	8.27682e-151	7
Pakap2	2.09928e-150	2.00073	0.549	0.275	7.01621e-146	7
Mef2c4	7.58636e-150	1.21485	0.782	0.543	2.53551e-145	7
Esyt21	6.69789e-143	1.63799	0.623	0.333	2.23857e-138	7
Rhoj2	1.81144e-138	0.924638	0.643	0.292	6.0542e-134	7
Ssbp22	1.83688e-138	1.53868	0.643	0.38	6.13922e-134	7
Rasal23	3.29493e-138	1.03297	0.804	0.575	1.10123e-133	7
Frmd4a1	2.73618e-133	1.48271	0.615	0.332	9.14486e-129	7
Sox61	3.98897e-124	1.2345	0.689	0.393	1.33319e-119	7
Fbxl17	6.41737e-124	1.02521	0.825	0.685	2.14481e-119	7
Mfhas1	2.02169e-123	1.65148	0.579	0.33	6.75688e-119	7
Inpp5a	2.04335e-123	1.58925	0.61	0.356	6.82928e-119	7
Arhgef7	7.19088e-123	2.06787	0.509	0.255	2.40334e-118	7
Asap2	2.08924e-122	1.41616	0.552	0.266	6.98265e-118	7
Ror12	8.23174e-119	1.52247	0.655	0.399	2.75121e-114	7
Ppp1r12b1	9.74454e-114	1.02474	0.764	0.477	3.25682e-109	7
Myo1e1	2.99702e-112	1.1418	0.516	0.214	1.00166e-107	7
Ralgapa22	3.41701e-107	1.05936	0.745	0.468	1.14203e-102	7
Ltbp12	3.91153e-107	1.79584	0.599	0.402	1.30731e-102	7
Mprip1	5.05989e-102	1.20509	0.65	0.42	1.69112e-97	7
Atp2b11	5.85814e-102	1.30783	0.632	0.398	1.95791e-97	7
Ano61	1.46071e-101	1.11452	0.578	0.285	4.882e-97	7
Mapre21	3.35152e-100	1.62269	0.553	0.327	1.12014e-95	7
Akap61	9.34081e-93	0.695587	0.778	0.422	3.12189e-88	7
9530026P05Rik2	1.83497e-89	1.03824	0.68	0.46	6.13282e-85	7
Ppp1cb	2.8337e-87	1.4698	0.537	0.322	9.47078e-83	7
Pip5k1b1	9.76299e-87	1.37856	0.554	0.347	3.26299e-82	7
Arhgap102	5.1562e-83	1.40235	0.633	0.458	1.7233e-78	7
Vcl	9.73212e-81	1.23105	0.599	0.408	3.25267e-76	7
Prdm161	1.15939e-75	1.51753	0.506	0.329	3.87491e-71	7
Pbx12	3.37859e-74	0.772507	0.814	0.65	1.12919e-69	7
Rapgef54	1.14529e-67	0.655031	0.547	0.275	3.8278e-63	7
Cacna2d11	4.70584e-62	0.714003	0.704	0.478	1.57279e-57	7
Igf1r2	3.28645e-61	1.03682	0.676	0.541	1.0984e-56	7
Pten2	3.82615e-59	1.05443	0.584	0.394	1.27878e-54	7
Filip1l1	1.0786e-58	0.770122	0.717	0.451	3.60489e-54	7
Jph21	1.08141e-58	0.958717	0.555	0.377	3.6143e-54	7
Ttc284	1.52485e-56	0.749665	0.67	0.463	5.09635e-52	7
Inpp4b2	5.38592e-54	1.32851	0.573	0.439	1.80008e-49	7
Tnfaip81	1.54692e-52	1.19595	0.541	0.377	5.17012e-48	7
Aopep	3.99667e-52	1.04169	0.614	0.484	1.33577e-47	7
Arid5b	5.21007e-51	1.18148	0.505	0.336	1.74131e-46	7
Ptprk2	1.20384e-50	0.827639	0.626	0.484	4.02346e-46	7
Gm207321	3.26637e-49	1.2307	0.508	0.353	1.09169e-44	7
Bmpr1a1	9.61451e-47	1.04542	0.554	0.404	3.21336e-42	7
Fermt21	1.76174e-43	0.905989	0.573	0.432	5.88808e-39	7
Pard33	5.36286e-38	0.667904	0.646	0.522	1.79238e-33	7
Pakap.12	3.59782e-32	0.685881	0.597	0.483	1.20247e-27	7
Bcas3	4.59503e-31	0.756289	0.635	0.556	1.53575e-26	7
Rbfox22	4.62059e-29	0.615432	0.655	0.595	1.54429e-24	7
Itgb1	3.51196e-26	0.817827	0.503	0.361	1.17377e-21	7
Nptn	2.35288e-24	0.764019	0.514	0.413	7.8638e-20	7
Celf1	5.26918e-16	0.61484	0.501	0.429	1.76107e-11	7
Clasp2	2.19616e-15	0.804637	0.541	0.501	7.34e-11	7
Tnnt21	0	2.66644	0.943	0.394	0	8
Myh61	0	1.42328	0.955	0.437	0	8
Myl3	0	3.71648	0.691	0.176	0	8
Myl21	0	3.11433	0.782	0.292	0	8
mt-Co1	0	2.68404	0.643	0.172	0	8
mt-Co3	0	3.36499	0.553	0.096	0	8
Neat11	0	2.31923	0.946	0.531	0	8
Pln1	7.03584e-263	1.815	0.803	0.393	2.35152e-258	8
Mybpc31	1.9627e-235	2.45708	0.694	0.345	6.55972e-231	8
Vegfa1	3.20388e-233	2.67025	0.647	0.343	1.0708e-228	8
Dmpk1	1.93889e-222	3.25801	0.606	0.296	6.48015e-218	8
Coro61	1.58028e-221	2.68636	0.634	0.337	5.28161e-217	8
Pde4dip1	3.62772e-208	1.38173	0.83	0.401	1.21246e-203	8
Ivns1abp1	6.12825e-206	1.99571	0.697	0.393	2.04818e-201	8
Tnni3	6.51951e-206	2.9812	0.651	0.236	2.17895e-201	8
Mb	1.38939e-181	3.53981	0.55	0.104	4.64362e-177	8
Gm312511	4.09689e-171	1.71006	0.577	0.307	1.36926e-166	8
Ddx5	8.07059e-159	2.06194	0.713	0.605	2.69735e-154	8
Smtn1	3.49282e-158	2.64175	0.594	0.352	1.16737e-153	8
Rsrp12	1.76007e-144	2.39042	0.655	0.503	5.88251e-140	8
Atp2a21	1.59508e-130	1.11349	0.789	0.41	5.33108e-126	8
Actc1	5.50708e-119	2.79114	0.586	0.267	1.84058e-114	8
Tcap1	5.26123e-90	2.80092	0.509	0.253	1.75841e-85	8
Tpm12	1.25573e-76	1.40837	0.645	0.47	4.19691e-72	8
Tnnc11	3.15372e-67	2.44834	0.524	0.321	1.05404e-62	8
Slc25a4	1.46606e-50	2.24268	0.509	0.293	4.89987e-46	8
Ldb31	2.26853e-47	0.897016	0.552	0.399	7.58189e-43	8
Srrm2	5.35107e-08	0.896912	0.326	0.514	0.00178844	8
Reln	0	9.5897	0.912	0.006	0	9
Mmrn1	0	12.1469	0.859	0.001	0	9
Flt4	0	5.73874	0.765	0.033	0	9
Wdr171	0	5.78422	0.739	0.027	0	9
Pard6g	0	6.1524	0.714	0.029	0	9
Nxn2	0	3.25944	0.885	0.205	0	9
Dock93	0	2.64863	0.93	0.25	0	9
Sema3d	0	6.02061	0.698	0.021	0	9
Ldb22	0	2.89798	0.86	0.191	0	9
Galnt182	0	3.40169	0.932	0.265	0	9
Sema6a2	0	2.39362	0.907	0.247	0	9
Adamtsl1	0	5.71987	0.681	0.029	0	9
Ccl21a	0	11.0409	0.643	0.001	0	9
Maf1	0	3.70381	0.686	0.048	0	9
D5Ertd615e	0	5.87313	0.662	0.026	0	9
Abi3bp1	0	3.72059	0.728	0.094	0	9
Apba2	0	5.4425	0.639	0.023	0	9
Gpm6a1	0	6.23364	0.62	0.01	0	9
Sema3a	0	5.80572	0.617	0.025	0	9
Tll1	0	7.19218	0.599	0.009	0	9
Nrp21	0	2.6262	0.769	0.18	0	9
Elk32	0	2.473	0.797	0.212	0	9
Prox11	0	4.08846	0.78	0.209	0	9
Dennd4a	0	3.48443	0.692	0.13	0	9
Tc2n	0	8.92907	0.558	0.002	0	9
Klhl4	0	4.64915	0.587	0.045	0	9
Sncaip2	0	2.81899	0.628	0.111	0	9
Dapk2	0	4.10532	0.583	0.071	0	9
Stab11	0	2.73599	0.587	0.078	0	9
Nr2f2	0	3.45629	0.577	0.07	0	9
Abhd17b	0	3.63316	0.628	0.13	0	9
Zfp423	0	3.38512	0.574	0.076	0	9
Pkhd1l11	0	5.92039	0.508	0.011	0	9
Chrm32	0	3.07322	0.53	0.042	0	9
Ctdspl1	0	2.9482	0.592	0.111	0	9
Ntn11	1.75912e-306	3.3275	0.836	0.316	5.87934e-302	9
Tshz23	1.41124e-296	2.08536	0.947	0.359	4.71663e-292	9
Pcsk61	1.41231e-292	2.25659	0.615	0.12	4.72022e-288	9
Ppfibp1	8.47608e-290	3.09952	0.783	0.253	2.83287e-285	9
Stxbp61	6.72045e-288	2.72259	0.746	0.19	2.24611e-283	9
Ston2	1.85243e-285	3.33478	0.545	0.102	6.19118e-281	9
Sned1	9.2067e-280	3.72851	0.668	0.186	3.07706e-275	9
Tspan18	2.15217e-272	3.48472	0.527	0.098	7.19298e-268	9
Elmo14	1.61023e-270	1.94021	0.924	0.362	5.38169e-266	9
Tspan5	2.83293e-265	2.71511	0.543	0.101	9.46821e-261	9
Ece11	4.14629e-259	2.69444	0.637	0.143	1.38577e-254	9
Plce12	3.06032e-255	2.60499	0.827	0.359	1.02282e-250	9
Zfp5212	4.14669e-253	2.62395	0.888	0.489	1.38591e-248	9
Lama43	3.88393e-251	2.39112	0.883	0.41	1.29809e-246	9
Cp	6.0258e-251	2.92271	0.787	0.3	2.01394e-246	9
Prkag2	1.59504e-248	3.21487	0.714	0.236	5.33095e-244	9
Kalrn3	2.94729e-248	2.64055	0.802	0.309	9.85045e-244	9
Stox22	8.54288e-243	2.09184	0.935	0.484	2.8552e-238	9
Mpp7	2.82134e-242	3.4464	0.687	0.221	9.4295e-238	9
Fmnl2	7.17878e-242	2.60126	0.838	0.353	2.39929e-237	9
Magi12	1.48976e-225	1.91368	0.937	0.561	4.97906e-221	9
Smad1	4.20522e-225	2.61997	0.661	0.185	1.40547e-220	9
Dab21	1.47576e-222	1.63495	0.645	0.163	4.93229e-218	9
Tgfbr21	1.77067e-218	2.67185	0.652	0.181	5.91793e-214	9
Dlg1	1.89773e-210	2.68602	0.837	0.492	6.34259e-206	9
Timp31	1.56646e-200	1.45552	0.744	0.227	5.23541e-196	9
Sash12	2.92005e-195	2.25289	0.793	0.323	9.75938e-191	9
Kank3	2.96417e-188	1.91118	0.502	0.118	9.90683e-184	9
Utrn4	1.08911e-187	1.7072	0.921	0.662	3.64003e-183	9
Calcrl	3.28609e-185	2.00301	0.621	0.179	1.09828e-180	9
Shank33	3.93065e-185	1.47048	0.689	0.189	1.3137e-180	9
Gls2	2.78026e-184	2.35838	0.755	0.298	9.29218e-180	9
Ccser1	6.97814e-184	3.00485	0.558	0.16	2.33223e-179	9
Dock62	1.37053e-183	1.91131	0.621	0.169	4.58059e-179	9
Thsd42	2.34762e-180	2.92384	0.611	0.207	7.84623e-176	9
Itga91	4.34886e-179	2.86798	0.684	0.281	1.45348e-174	9
Nfat5	1.48523e-178	2.17963	0.841	0.535	4.96395e-174	9
Tspan91	2.01635e-176	2.09569	0.717	0.266	6.73905e-172	9
Rbms13	6.0786e-174	1.61553	0.925	0.705	2.03159e-169	9
Rhoj3	5.71993e-173	1.77029	0.771	0.293	1.91172e-168	9
Ptpn141	9.08837e-172	2.58168	0.661	0.257	3.03752e-167	9
Ppp1r2	1.2077e-167	2.61244	0.623	0.191	4.03637e-163	9
Map3k1	3.35387e-167	2.31551	0.634	0.222	1.12093e-162	9
Lyn2	2.01925e-158	1.63527	0.703	0.228	6.74874e-154	9
Sntb22	2.80962e-157	2.07971	0.626	0.193	9.39031e-153	9
St6galnac33	1.59071e-155	1.24506	0.608	0.181	5.31648e-151	9
Stt3b	3.57482e-155	2.91908	0.52	0.154	1.19478e-150	9
Unc13b2	7.97673e-155	2.04333	0.52	0.142	2.66598e-150	9
Slco3a11	8.65374e-151	2.07127	0.765	0.408	2.89225e-146	9
Prex23	6.17358e-150	1.38922	0.84	0.372	2.06333e-145	9
Sptlc2	5.31471e-149	2.34655	0.552	0.172	1.77628e-144	9
Rapgef55	3.39605e-148	2.02293	0.714	0.276	1.13503e-143	9
Cavin2	2.37745e-144	1.96321	0.558	0.147	7.94591e-140	9
Vav33	3.27045e-143	1.53262	0.724	0.294	1.09305e-138	9
Plekhg12	9.22747e-140	1.90508	0.684	0.266	3.08401e-135	9
Prkch3	4.31777e-139	1.20818	0.696	0.229	1.44309e-134	9
Pecam13	6.92518e-137	1.16474	0.606	0.185	2.31453e-132	9
Cmip2	3.09443e-129	1.47974	0.665	0.25	1.03422e-124	9
Csgalnact11	1.7386e-127	1.63216	0.549	0.18	5.81074e-123	9
Thsd7a1	1.78887e-124	1.44529	0.58	0.184	5.97875e-120	9
Abca1	8.25224e-124	2.32443	0.557	0.211	2.75806e-119	9
Tanc21	1.57031e-123	1.98133	0.659	0.261	5.24829e-119	9
Plxna42	7.2732e-115	2.05673	0.702	0.388	2.43085e-110	9
Dock42	4.7186e-113	1.2654	0.825	0.484	1.57705e-108	9
Adgrf53	5.34491e-107	0.977696	0.614	0.219	1.78637e-102	9
Egfl73	6.15715e-107	0.882661	0.537	0.18	2.05784e-102	9
Ets13	4.05391e-106	1.06224	0.651	0.256	1.3549e-101	9
Hmcn12	2.10924e-101	1.44561	0.762	0.453	7.0495e-97	9
Emcn2	2.64506e-100	1.09805	0.511	0.167	8.84033e-96	9
Ppp2r5a	7.03722e-95	1.83756	0.617	0.289	2.35198e-90	9
Epb41l22	3.53725e-91	1.29565	0.628	0.267	1.18222e-86	9
Nr3c21	2.901e-88	1.50827	0.802	0.532	9.69574e-84	9
Flnb1	4.57779e-88	1.2623	0.501	0.163	1.52999e-83	9
Trps13	8.10421e-86	1.14828	0.665	0.301	2.70859e-81	9
Ptprk3	1.44586e-83	1.25274	0.75	0.484	4.83236e-79	9
Prkg13	5.2471e-81	0.636711	0.863	0.552	1.75369e-76	9
Cdk172	2.59904e-80	1.55206	0.601	0.286	8.68652e-76	9
Macf1	1.36551e-78	1.02639	0.878	0.751	4.5638e-74	9
Crim12	2.74729e-78	1.91661	0.64	0.371	9.18198e-74	9
Diaph24	1.29508e-77	1.14063	0.831	0.67	4.32841e-73	9
Fbn13	3.01872e-77	0.937186	0.554	0.231	1.00892e-72	9
Gtdc1	6.08135e-76	1.65786	0.546	0.256	2.03251e-71	9
Ppp3ca3	5.30918e-75	1.27064	0.808	0.631	1.77443e-70	9
Zfpm23	1.9708e-74	0.981704	0.872	0.617	6.58682e-70	9
Pitpnc12	1.34991e-71	0.965821	0.808	0.553	4.51167e-67	9
Zfhx33	4.90067e-71	1.23931	0.651	0.344	1.6379e-66	9
Syne13	4.2065e-70	1.35204	0.731	0.514	1.4059e-65	9
Pgm52	3.92122e-68	2.15699	0.514	0.266	1.31055e-63	9
Cped15	4.63245e-68	0.947062	0.837	0.663	1.54826e-63	9
Arhgap291	1.12884e-67	1.39676	0.671	0.435	3.77282e-63	9
Maml25	3.79084e-67	0.979983	0.802	0.453	1.26698e-62	9
Foxp13	6.42674e-67	0.927204	0.821	0.673	2.14794e-62	9
App4	9.05679e-67	0.933149	0.68	0.342	3.02696e-62	9
Susd6	1.47337e-65	1.3499	0.695	0.482	4.9243e-61	9
Farp12	2.11203e-65	1.41428	0.543	0.243	7.05883e-61	9
Dock12	4.63689e-65	1.11672	0.743	0.483	1.54974e-60	9
Meis22	1.67085e-64	1.41655	0.678	0.451	5.58432e-60	9
1700025G04Rik	4.21616e-63	1.49014	0.579	0.311	1.40913e-58	9
Add3	3.08903e-62	1.59782	0.579	0.318	1.03241e-57	9
Gab22	3.59353e-62	0.909033	0.809	0.559	1.20103e-57	9
Afap1l11	2.11963e-59	1.41872	0.535	0.273	7.08422e-55	9
Foxo1	1.0377e-56	1.48703	0.543	0.297	3.4682e-52	9
Etl42	1.16005e-56	1.39197	0.684	0.455	3.87712e-52	9
Tanc13	1.23483e-56	1.07225	0.655	0.382	4.12706e-52	9
Ralgapa23	3.68556e-56	1.11434	0.747	0.469	1.23179e-51	9
Peak12	1.21294e-55	0.968556	0.771	0.575	4.05388e-51	9
Tulp4	1.23592e-55	1.45693	0.596	0.382	4.13068e-51	9
Sbf22	3.4071e-55	1.0029	0.772	0.628	1.13872e-50	9
Pde7b2	2.17144e-54	1.62319	0.631	0.405	7.25739e-50	9
Hip12	9.36259e-53	1.11528	0.592	0.326	3.12916e-48	9
Asap11	1.25837e-52	1.46247	0.72	0.631	4.20572e-48	9
Esyt22	1.99005e-52	1.32504	0.586	0.335	6.65116e-48	9
Mical31	1.05881e-50	1.42271	0.599	0.386	3.53877e-46	9
Ptpn12	2.88924e-50	1.30757	0.564	0.321	9.65643e-46	9
Eps152	1.0825e-49	1.2021	0.518	0.239	3.61794e-45	9
Ssbp23	2.09396e-49	1.4821	0.584	0.382	6.99845e-45	9
Grk51	3.20304e-49	1.1911	0.643	0.407	1.07052e-44	9
Tcf7l12	1.53163e-48	1.21732	0.555	0.306	5.11901e-44	9
Gnaq4	2.3453e-48	0.898988	0.734	0.544	7.83845e-44	9
Yes1	3.15768e-45	1.40272	0.53	0.317	1.05536e-40	9
Gnb1	2.22762e-44	1.08931	0.54	0.282	7.44514e-40	9
4931406P16Rik3	1.57239e-42	1.05523	0.549	0.304	5.25525e-38	9
Nbea2	2.01322e-42	0.968372	0.702	0.561	6.72858e-38	9
Gmds1	1.18463e-40	1.16171	0.517	0.286	3.95926e-36	9
Plpp1	2.90914e-40	1.18943	0.505	0.269	9.72291e-36	9
Nfia2	1.86199e-38	0.622268	0.888	0.796	6.22314e-34	9
Ube2e21	4.93593e-38	1.051	0.677	0.533	1.64969e-33	9
Tmtc11	6.85191e-38	1.06265	0.648	0.48	2.29005e-33	9
Pard3b2	3.1755e-37	0.792858	0.768	0.672	1.06132e-32	9
Erbin	1.3989e-36	1.17265	0.546	0.344	4.6754e-32	9
Klf72	1.17246e-35	0.761467	0.631	0.387	3.91859e-31	9
Hivep3	7.25071e-35	1.42294	0.514	0.343	2.42333e-30	9
Cep85l1	1.06619e-34	1.1892	0.533	0.323	3.5634e-30	9
Mtss11	8.53776e-34	1.10533	0.551	0.357	2.85349e-29	9
Cdc42bpa1	1.4471e-31	0.91886	0.57	0.382	4.8365e-27	9
Numb3	6.36983e-30	0.894042	0.559	0.379	2.12893e-25	9
Apc	8.23718e-30	1.11065	0.561	0.426	2.75303e-25	9
Exoc41	1.65348e-29	0.743457	0.733	0.648	5.52626e-25	9
Wnk11	1.767e-29	0.884734	0.711	0.607	5.90568e-25	9
Srgap23	2.53237e-29	0.731337	0.636	0.435	8.46367e-25	9
Sgms13	2.21932e-27	0.6716	0.667	0.544	7.41742e-23	9
Dip2c1	5.17145e-27	0.867756	0.756	0.634	1.7284e-22	9
Tns1	2.63778e-26	0.701533	0.715	0.598	8.81598e-22	9
Lims11	7.69237e-26	0.777437	0.655	0.532	2.57094e-21	9
Tcf121	8.08066e-26	0.664878	0.728	0.627	2.70072e-21	9
Nf11	5.94394e-25	0.989808	0.581	0.476	1.98658e-20	9
Snrk3	1.62504e-24	0.687517	0.579	0.396	5.4312e-20	9
Ttc285	3.0309e-24	0.669087	0.642	0.464	1.01299e-19	9
Wwtr12	1.19954e-23	0.921632	0.551	0.392	4.00912e-19	9
Uvrag1	1.24842e-22	0.928855	0.546	0.416	4.17249e-18	9
Usp24	7.37034e-22	1.11835	0.501	0.377	2.46332e-17	9
Fus	1.29928e-21	0.695179	0.648	0.559	4.34245e-17	9
Arhgap63	4.77258e-20	1.08335	0.565	0.45	1.59509e-15	9
Stag13	2.47398e-19	0.699264	0.642	0.529	8.26853e-15	9
Msrb32	3.45658e-19	0.826922	0.57	0.472	1.15526e-14	9
Cblb	8.26093e-19	0.959889	0.504	0.389	2.76097e-14	9
Fyn	2.04178e-18	0.844883	0.539	0.412	6.82405e-14	9
Fam172a2	1.35872e-17	0.694222	0.605	0.5	4.54112e-13	9
Rock2	1.08079e-16	0.75633	0.628	0.554	3.61222e-12	9
Dysf1	1.09939e-15	0.843375	0.536	0.459	3.67439e-11	9
Aopep1	1.3272e-15	0.663503	0.586	0.485	4.43576e-11	9
Ogt2	1.16388e-14	0.791278	0.567	0.484	3.88993e-10	9
Nr3c1	4.92954e-14	0.797169	0.537	0.444	1.64755e-09	9
Exoc6b2	6.21616e-14	0.62803	0.593	0.511	2.07756e-09	9
Kmt2c	1.07052e-13	0.672199	0.587	0.533	3.57788e-09	9
Plekha51	2.74155e-13	0.841898	0.504	0.427	9.16281e-09	9
Rabgap1l	7.77662e-12	0.600851	0.593	0.517	2.5991e-07	9
Phf20l1	3.42576e-11	0.832749	0.518	0.467	1.14496e-06	9
Ddx172	2.35464e-10	0.605826	0.561	0.501	7.86969e-06	9
Setd51	1.89442e-09	0.603662	0.58	0.517	6.33153e-05	9
Diaph3	0	7.93516	0.798	0.008	0	10
Rad51b	0	4.8587	0.839	0.09	0	10
Top2a	0	9.96456	0.708	0.002	0	10
Mki67	0	9.49313	0.679	0.002	0	10
Knl1	0	8.69743	0.637	0.003	0	10
Atad2	0	5.16554	0.662	0.034	0	10
Cit	0	5.97844	0.637	0.014	0	10
Neil3	0	10.16	0.609	0.001	0	10
Hjurp	0	3.51025	0.714	0.122	0	10
Kif15	0	8.5226	0.593	0.003	0	10
Kif23	0	7.31809	0.593	0.005	0	10
Smc4	0	3.8246	0.662	0.075	0	10
Lockd	0	7.5199	0.591	0.005	0	10
Cep128	0	3.66449	0.695	0.111	0	10
Ezh2	0	4.03701	0.669	0.097	0	10
Kif11	0	8.32556	0.564	0.005	0	10
Lmnb1	0	5.16699	0.57	0.032	0	10
Sdk1	0	4.63447	0.606	0.071	0	10
Brip1	0	5.63734	0.548	0.013	0	10
Ulbp1	0	5.12983	0.538	0.018	0	10
Cenpp	0	3.87954	0.645	0.13	0	10
E2f7	0	5.51234	0.525	0.012	0	10
Kif4	0	7.44649	0.516	0.003	0	10
Smc2	0	5.21298	0.535	0.023	0	10
Cep192	0	3.22608	0.587	0.083	0	10
Efcab11	0	7.01192	0.508	0.006	0	10
Prim2	0	3.62663	0.568	0.075	0	10
Tmpo	2.02084e-306	3.17969	0.695	0.12	6.75405e-302	10
Nsd2	1.29081e-289	3.41904	0.708	0.157	4.31415e-285	10
Apobec3	1.746e-254	2.44445	0.583	0.109	5.83547e-250	10
Inpp5d1	5.01959e-224	2.50746	0.538	0.104	1.67765e-219	10
Pola1	2.3133e-209	3.41874	0.634	0.161	7.7315e-205	10
Cep112	1.06501e-195	2.69785	0.688	0.203	3.55946e-191	10
Ncapd3	2.62928e-185	3.0393	0.568	0.153	8.78759e-181	10
Cntln	7.18096e-181	2.11577	0.576	0.135	2.40002e-176	10
Lcorl	3.94318e-179	2.61716	0.72	0.242	1.31789e-174	10
Pbx3	7.31458e-147	2.22468	0.707	0.248	2.44468e-142	10
Pip4k2a1	3.64762e-132	2.07626	0.647	0.197	1.21911e-127	10
Lyn3	8.79669e-128	1.62579	0.714	0.229	2.94003e-123	10
Frmd4b3	2.7571e-127	1.91335	0.697	0.241	9.21478e-123	10
Elmo15	6.78687e-127	1.54518	0.845	0.364	2.26831e-122	10
Myo5a1	6.08297e-125	2.18213	0.52	0.145	2.03305e-120	10
Ccdc88a	1.34504e-123	1.95317	0.583	0.177	4.49538e-119	10
Cbfb	1.51957e-119	2.07973	0.559	0.161	5.07872e-115	10
Sfmbt1	9.83793e-116	2.31934	0.544	0.176	3.28803e-111	10
Smchd1	1.82988e-112	1.99163	0.693	0.297	6.11583e-108	10
Dab22	1.91142e-109	1.90158	0.533	0.164	6.38835e-105	10
Cbx5	4.25758e-109	2.31935	0.535	0.189	1.42297e-104	10
Cmip3	8.92099e-106	1.36419	0.686	0.251	2.98157e-101	10
Arhgap182	9.43217e-100	1.48072	0.701	0.257	3.15242e-95	10
Suz12	2.32339e-98	2.02832	0.508	0.191	7.76523e-94	10
Nav13	2.86741e-98	1.22163	0.794	0.329	9.58346e-94	10
Fli13	7.9468e-97	0.822054	0.824	0.319	2.65598e-92	10
B2m	1.0842e-95	1.47207	0.501	0.146	3.6236e-91	10
Serinc31	5.5236e-91	1.70198	0.632	0.226	1.8461e-86	10
H2-K1	5.72477e-91	1.48726	0.538	0.168	1.91333e-86	10
Nrp22	9.5189e-90	1.6711	0.538	0.183	3.18141e-85	10
Ankrd441	4.26551e-88	1.34266	0.703	0.29	1.42562e-83	10
Uhrf2	9.16234e-87	1.7459	0.594	0.243	3.06224e-82	10
Ckap5	6.13074e-84	2.22067	0.566	0.249	2.04902e-79	10
[truncated: 830 more rows]

## Sheet: 0(CM_0)
CM_0	p_val	avg_log2FC	pct.1	pct.2	p_val_adj	cluster	gene
Ttn	0	5.78738	0.996	0.03	0	0	Ttn
Rbm20	0	5.96586	0.989	0.023	0	0	Rbm20
Fhod3	0	5.87289	0.984	0.02	0	0	Fhod3
Ryr2	0	6.09413	0.992	0.029	0	0	Ryr2
Pde4dip	0	5.14492	0.991	0.029	0	0	Pde4dip
Fhl2	0	6.00598	0.984	0.024	0	0	Fhl2
Palld	0	5.5861	0.986	0.03	0	0	Palld
Pde4d	0	5.56617	0.988	0.033	0	0	Pde4d
Tnni3k	0	5.89694	0.97	0.017	0	0	Tnni3k
Trdn	0	5.98031	0.971	0.018	0	0	Trdn
Ldb3	0	5.34592	0.979	0.026	0	0	Ldb3
Tnnt2	0	4.06176	0.977	0.028	0	0	Tnnt2
Esrrg	0	5.35141	0.975	0.031	0	0	Esrrg
Pln	0	4.67153	0.972	0.028	0	0	Pln
Nexn	0	5.20859	0.97	0.027	0	0	Nexn
Mlip	0	5.9177	0.958	0.017	0	0	Mlip
Fgf13	0	5.96351	0.964	0.024	0	0	Fgf13
Ctnna3	0	4.25984	0.988	0.049	0	0	Ctnna3
Actn2	0	5.62443	0.956	0.019	0	0	Actn2
Atp2a2	0	4.94797	0.98	0.05	0	0	Atp2a2
Rcan2	0	4.22775	0.971	0.044	0	0	Rcan2
Cdh2	0	5.46941	0.957	0.036	0	0	Cdh2
Dmd	0	4.71485	0.97	0.049	0	0	Dmd
Ank3	0	4.28211	0.954	0.035	0	0	Ank3
Obscn	0	5.09217	0.93	0.018	0	0	Obscn
Kcnn2	0	5.67547	0.926	0.015	0	0	Kcnn2
Cpeb3	0	5.22619	0.953	0.042	0	0	Cpeb3
Sox6	0	4.2657	0.949	0.04	0	0	Sox6
Ccdc141	0	4.78029	0.949	0.041	0	0	Ccdc141
Sorbs2	0	3.91164	0.974	0.067	0	0	Sorbs2
Txlnb	0	5.48244	0.923	0.016	0	0	Txlnb
Corin	0	5.43421	0.925	0.019	0	0	Corin
Pcdh7	0	4.70633	0.983	0.08	0	0	Pcdh7
Chrm2	0	5.43904	0.919	0.017	0	0	Chrm2
Hs3st5	0	6.10222	0.912	0.012	0	0	Hs3st5
Erbb4	0	4.76843	0.917	0.019	0	0	Erbb4
Myocd	0	5.16137	0.925	0.027	0	0	Myocd
Myh6	0	4.29883	0.985	0.093	0	0	Myh6
Ivns1abp	0	4.09672	0.936	0.048	0	0	Ivns1abp
Akap6	0	4.12553	0.964	0.079	0	0	Akap6
Cacnb2	0	3.71663	0.969	0.087	0	0	Cacnb2
Nav2	0	4.28697	0.907	0.031	0	0	Nav2
Cacna1c	0	4.76554	0.992	0.122	0	0	Cacna1c
Tacc2	0	4.14772	0.939	0.073	0	0	Tacc2
Acacb	0	4.8323	0.887	0.024	0	0	Acacb
Nebl	0	3.62733	0.891	0.032	0	0	Nebl
Rbm24	0	4.77981	0.877	0.021	0	0	Rbm24
Thrb	0	3.9435	0.933	0.078	0	0	Thrb
Ppargc1a	0	6.05832	0.865	0.012	0	0	Ppargc1a
Kbtbd12	0	5.95757	0.864	0.011	0	0	Kbtbd12
Pde4b	0	3.92348	0.958	0.109	0	0	Pde4b
Gm20619	0	6.29834	0.857	0.008	0	0	Gm20619
Ckmt2	0	4.92523	0.87	0.022	0	0	Ckmt2
Grm1	0	6.38405	0.855	0.013	0	0	Grm1
Kcnd2	0	6.36498	0.853	0.013	0	0	Kcnd2
Art1	0	4.91076	0.854	0.015	0	0	Art1
Ppara	0	6.0374	0.844	0.01	0	0	Ppara
Filip1l	0	3.65031	0.961	0.128	0	0	Filip1l
Vegfa	0	4.05757	0.852	0.02	0	0	Vegfa
Fgf1	0	4.32246	0.86	0.032	0	0	Fgf1
Ppip5k2	0	4.36344	0.86	0.033	0	0	Ppip5k2
Slc25a13	0	5.99602	0.838	0.011	0	0	Slc25a13
Lmo7	0	3.38096	0.971	0.144	0	0	Lmo7
Mylk3	0	5.22316	0.838	0.013	0	0	Mylk3
Lmod2	0	5.77627	0.833	0.011	0	0	Lmod2
Cmya5	0	5.35334	0.833	0.016	0	0	Cmya5
Prune2	0	4.75534	0.849	0.034	0	0	Prune2
Mybpc3	0	3.89601	0.844	0.03	0	0	Mybpc3
Mast2	0	3.34611	0.918	0.105	0	0	Mast2
Synpo2	0	3.16782	0.887	0.077	0	0	Synpo2
Ppp1r14c	0	5.52198	0.823	0.013	0	0	Ppp1r14c
Tbc1d4	0	3.37376	0.897	0.089	0	0	Tbc1d4
Gm30382	0	5.46848	0.821	0.014	0	0	Gm30382
Scn5a	0	4.94887	0.823	0.016	0	0	Scn5a
Nckap5	0	3.12808	0.932	0.126	0	0	Nckap5
Rbfox1	0	2.85976	0.884	0.078	0	0	Rbfox1
Speg	0	4.55576	0.825	0.024	0	0	Speg
Kcnj3	0	5.70916	0.812	0.012	0	0	Kcnj3
Adk	0	3.284	0.95	0.15	0	0	Adk
Jph2	0	3.58675	0.864	0.066	0	0	Jph2
Gramd1b	0	4.70822	0.822	0.025	0	0	Gramd1b
Mypn	0	5.75319	0.805	0.01	0	0	Mypn
Ppargc1b	0	3.67259	0.853	0.059	0	0	Ppargc1b
Pkp2	0	5.30068	0.806	0.013	0	0	Pkp2
Ank	0	3.86311	0.856	0.064	0	0	Ank
Coro6	0	3.69153	0.821	0.029	0	0	Coro6
Grb14	0	5.12002	0.811	0.02	0	0	Grb14
Acyp2	0	3.10757	0.922	0.138	0	0	Acyp2
Pip5k1b	0	3.78852	0.825	0.041	0	0	Pip5k1b
Trim55	0	5.68033	0.792	0.01	0	0	Trim55
Casz1	0	3.30094	0.85	0.068	0	0	Casz1
Ralgapa2	0	2.66779	0.946	0.164	0	0	Ralgapa2
Dtna	0	4.32587	0.808	0.027	0	0	Dtna
Ogdh	0	3.17581	0.887	0.107	0	0	Ogdh
Tecrl	0	5.80487	0.788	0.01	0	0	Tecrl
Mitf	0	2.47953	0.901	0.123	0	0	Mitf
Kcnd3	0	5.73632	0.788	0.011	0	0	Kcnd3
Ppp1r12b	0	2.89758	0.952	0.175	0	0	Ppp1r12b
Kcng2	0	5.508	0.783	0.011	0	0	Kcng2
Usp13	0	5.62112	0.783	0.012	0	0	Usp13
Limch1	0	2.67517	0.962	0.192	0	0	Limch1
Acsl1	0	4.02197	0.804	0.037	0	0	Acsl1
Smtn	0	3.12386	0.821	0.054	0	0	Smtn
Myoz2	0	5.2414	0.778	0.015	0	0	Myoz2
Dpf3	0	3.98139	0.8	0.037	0	0	Dpf3
Magi2	0	3.28723	0.965	0.203	0	0	Magi2
Slc8a1	0	3.68025	0.987	0.225	0	0	Slc8a1
Shroom3	0	5.16693	0.776	0.017	0	0	Shroom3
Ppp1r3a	0	5.77063	0.767	0.01	0	0	Ppp1r3a
Trabd2b	0	3.5503	0.814	0.06	0	0	Trabd2b
Myo18b	0	5.03523	0.764	0.012	0	0	Myo18b
Mhrt	0	5.89	0.763	0.011	0	0	Mhrt
Oxct1	0	3.0886	0.848	0.097	0	0	Oxct1
Lrrc2	0	5.51159	0.76	0.01	0	0	Lrrc2
Asb2	0	4.46722	0.772	0.022	0	0	Asb2
Asb14	0	5.33316	0.759	0.009	0	0	Asb14
Prdm16	0	3.46367	0.785	0.037	0	0	Prdm16
Tmem117	0	5.71002	0.758	0.01	0	0	Tmem117
D830005E20Rik	0	6.06359	0.76	0.013	0	0	D830005E20Rik
Gm31251	0	4.8945	0.762	0.018	0	0	Gm31251
Myh7	0	5.83763	0.748	0.008	0	0	Myh7
Myh7b	0	5.36353	0.747	0.01	0	0	Myh7b
Camta1	0	2.60678	0.893	0.156	0	0	Camta1
Alpk3	0	5.13691	0.748	0.011	0	0	Alpk3
Larp1b	0	4.02418	0.773	0.037	0	0	Larp1b
Nfyc	0	2.98539	0.828	0.094	0	0	Nfyc
Garem1	0	3.69665	0.787	0.053	0	0	Garem1
Chpt1	0	4.48238	0.76	0.028	0	0	Chpt1
Nrap	0	5.16317	0.743	0.013	0	0	Nrap
Clasp1	0	2.73352	0.896	0.167	0	0	Clasp1
Pygb	0	4.449	0.761	0.032	0	0	Pygb
Pde1c	0	4.02396	0.766	0.037	0	0	Pde1c
Mpc1	0	3.61721	0.78	0.051	0	0	Mpc1
Fign	0	4.02086	0.748	0.024	0	0	Fign
Xirp2	0	5.37561	0.736	0.012	0	0	Xirp2
Sorbs1	0	3.19638	0.986	0.262	0	0	Sorbs1
Smyd1	0	5.22854	0.733	0.011	0	0	Smyd1
Kcnq1	0	4.19502	0.752	0.032	0	0	Kcnq1
Gm17428	0	5.6673	0.728	0.009	0	0	Gm17428
Slc4a4	0	4.72187	0.74	0.022	0	0	Slc4a4
Pcgf5	0	3.23846	0.784	0.066	0	0	Pcgf5
Hk2	0	4.49485	0.739	0.022	0	0	Hk2
Dmpk	0	3.46739	0.735	0.019	0	0	Dmpk
Myom1	0	4.27135	0.743	0.027	0	0	Myom1
Mylk4	0	5.32881	0.728	0.013	0	0	Mylk4
Rnf207	0	4.30428	0.729	0.015	0	0	Rnf207
Cacna2d1	0	2.38886	0.915	0.201	0	0	Cacna2d1
Lrrfip2	0	2.37866	0.865	0.151	0	0	Lrrfip2
Ehbp1	0	2.63011	0.93	0.217	0	0	Ehbp1
Myom2	0	4.79826	0.727	0.014	0	0	Myom2
Macrod1	0	5.07036	0.726	0.014	0	0	Macrod1
Gpcpd1	0	2.84042	0.865	0.154	0	0	Gpcpd1
Neo1	0	3.35337	0.762	0.052	0	0	Neo1
Rmdn1	0	2.56856	0.833	0.126	0	0	Rmdn1
Immp2l	0	2.02805	0.868	0.163	0	0	Immp2l
Hmcn1	0	1.2018	0.882	0.179	0	0	Hmcn1
Chchd3	0	2.34224	0.915	0.214	0	0	Chchd3
D830032E09Rik	0	5.55542	0.711	0.01	0	0	D830032E09Rik
Vwa8	0	2.55989	0.853	0.152	0	0	Vwa8
Clip1	0	2.40794	0.853	0.154	0	0	Clip1
Ppp2r3a	0	2.25141	0.911	0.214	0	0	Ppp2r3a
Itgb6	0	6.01813	0.704	0.007	0	0	Itgb6
Mical3	0	2.3997	0.81	0.114	0	0	Mical3
Pank1	0	5.30995	0.707	0.012	0	0	Pank1
Neat1	0	2.5797	0.957	0.264	0	0	Neat1
Srl	0	5.27509	0.704	0.012	0	0	Srl
Stau2	0	3.71426	0.734	0.043	0	0	Stau2
Phtf2	0	3.55031	0.73	0.039	0	0	Phtf2
Insr	0	2.12334	0.898	0.21	0	0	Insr
Aco2	0	2.64559	0.776	0.088	0	0	Aco2
Alpk2	0	5.62606	0.692	0.009	0	0	Alpk2
Rilpl1	0	4.0218	0.706	0.026	0	0	Rilpl1
Ank2	0	2.46608	0.978	0.299	0	0	Ank2
Gata4	0	2.22362	0.823	0.145	0	0	Gata4
Magi3	0	2.27624	0.875	0.198	0	0	Magi3
Bmpr1a	0	2.35183	0.816	0.14	0	0	Bmpr1a
Acss1	0	3.34381	0.715	0.043	0	0	Acss1
Slc27a1	0	4.15958	0.683	0.014	0	0	Slc27a1
Agl	0	3.31864	0.713	0.046	0	0	Agl
Lrrfip1	0	1.96371	0.82	0.154	0	0	Lrrfip1
Arhgap26	0	2.16968	0.953	0.29	0	0	Arhgap26
Slc16a10	0	3.65823	0.697	0.034	0	0	Slc16a10
Mfn1	0	2.81812	0.728	0.066	0	0	Mfn1
Lrrtm3	0	3.71906	0.697	0.035	0	0	Lrrtm3
Cap2	0	2.65195	0.721	0.06	0	0	Cap2
Tmod1	0	3.61948	0.693	0.032	0	0	Tmod1
Psme4	0	2.19912	0.917	0.259	0	0	Psme4
Esrrb	0	5.70923	0.665	0.008	0	0	Esrrb
Asph	0	2.07054	0.808	0.152	0	0	Asph
Abcd3	0	2.75663	0.731	0.076	0	0	Abcd3
Dsg2	0	5.19673	0.666	0.011	0	0	Dsg2
Mtus2	0	5.76629	0.662	0.008	0	0	Mtus2
Atcayos	0	5.6535	0.663	0.01	0	0	Atcayos
Ano4	0	3.93162	0.687	0.034	0	0	Ano4
Plekhm2	0	2.43511	0.754	0.102	0	0	Plekhm2
Kidins220	0	2.0442	0.812	0.16	0	0	Kidins220
Strip2	0	5.41219	0.654	0.008	0	0	Strip2
Gm49708	0	6.52582	0.649	0.006	0	0	Gm49708
Ptpn4	0	2.27591	0.747	0.105	0	0	Ptpn4
Prkaa2	0	4.73856	0.66	0.018	0	0	Prkaa2
Ppm1l	0	3.08293	0.678	0.037	0	0	Ppm1l
Usp28	0	3.96993	0.666	0.025	0	0	Usp28
Inpp4b	0	1.18201	0.829	0.19	0	0	Inpp4b
Sgcg	0	5.4339	0.645	0.008	0	0	Sgcg
Gm20732	0	2.35293	0.742	0.105	0	0	Gm20732
Rhobtb1	0	2.69713	0.732	0.096	0	0	Rhobtb1
Atp1a1	0	3.31001	0.68	0.045	0	0	Atp1a1
Sbk1	0	5.28136	0.644	0.009	0	0	Sbk1
Trim63	0	4.86003	0.644	0.01	0	0	Trim63
Wnk2	0	4.58714	0.648	0.015	0	0	Wnk2
Enah	0	2.17125	0.72	0.088	0	0	Enah
Casq2	0	3.20256	0.676	0.044	0	0	Casq2
Ktn1	0	1.77413	0.87	0.238	0	0	Ktn1
Gm35330	0	6.26952	0.636	0.006	0	0	Gm35330
Popdc2	0	5.05239	0.639	0.009	0	0	Popdc2
Tpm1	0	2.12065	0.854	0.225	0	0	Tpm1
Fyco1	0	2.70453	0.695	0.066	0	0	Fyco1
Fblim1	0	3.0791	0.676	0.048	0	0	Fblim1
Large1	0	2.00736	0.942	0.314	0	0	Large1
Rarb	0	3.06138	0.679	0.052	0	0	Rarb
Hadha	0	2.62515	0.704	0.078	0	0	Hadha
Tmem38a	0	4.94186	0.637	0.011	0	0	Tmem38a
Myzap	0	3.37345	0.672	0.047	0	0	Myzap
Vldlr	0	5.35629	0.632	0.007	0	0	Vldlr
Etfa	0	2.39265	0.715	0.091	0	0	Etfa
Celf2	0	0.832166	0.967	0.343	0	0	Celf2
Gm12295	0	4.95816	0.633	0.01	0	0	Gm12295
Dsp	0	4.94272	0.635	0.012	0	0	Dsp
Col4a5	0	2.68568	0.687	0.067	0	0	Col4a5
Abtb2	0	3.20464	0.661	0.041	0	0	Abtb2
Lpl	0	2.32912	0.733	0.113	0	0	Lpl
Nipsnap2	0	2.66709	0.686	0.07	0	0	Nipsnap2
Tango2	0	2.80631	0.676	0.061	0	0	Tango2
Phactr2	0	1.60768	0.819	0.205	0	0	Phactr2
Fsd2	0	5.74032	0.621	0.008	0	0	Fsd2
Cdh13	0	0.990985	0.958	0.345	0	0	Cdh13
Samd4	0	1.52738	0.895	0.282	0	0	Samd4
Meis2	0	1.35862	0.824	0.212	0	0	Meis2
Kif16b	0	2.01552	0.737	0.127	0	0	Kif16b
Ppp1r9a	0	2.00688	0.704	0.1	0	0	Ppp1r9a
Trim7	0	5.1032	0.611	0.008	0	0	Trim7
Fgf14	0	3.33213	0.631	0.028	0	0	Fgf14
Metap1d	0	2.11014	0.698	0.096	0	0	Metap1d
Trim54	0	5.17074	0.609	0.008	0	0	Trim54
Usp2	0	4.53291	0.615	0.014	0	0	Usp2
Bag3	0	2.8694	0.656	0.056	0	0	Bag3
Me3	0	3.31835	0.635	0.036	0	0	Me3
Prkn	0	2.71448	0.747	0.148	0	0	Prkn
Erc1	0	1.62461	0.792	0.196	0	0	Erc1
Tcap	0	3.52016	0.618	0.022	0	0	Tcap
Pdlim5	0	1.86939	0.928	0.335	0	0	Pdlim5
Hadhb	0	2.74703	0.654	0.061	0	0	Hadhb
Nr3c2	0	1.47456	0.894	0.301	0	0	Nr3c2
Msi2	0	1.90563	0.971	0.378	0	0	Msi2
Cobll1	0	1.24899	0.762	0.171	0	0	Cobll1
Stk39	0	2.16518	0.754	0.163	0	0	Stk39
Slc4a3	0	4.11872	0.604	0.014	0	0	Slc4a3
Abhd18	0	2.63262	0.659	0.07	0	0	Abhd18
Tfdp2	0	2.2877	0.68	0.092	0	0	Tfdp2
Prkca	0	1.43373	0.788	0.2	0	0	Prkca
Clybl	0	2.24008	0.675	0.087	0	0	Clybl
Rgs6	0	1.31665	0.731	0.143	0	0	Rgs6
Adra1a	0	4.80268	0.6	0.012	0	0	Adra1a
Macrod2	0	3.08884	0.631	0.045	0	0	Macrod2
Mlf1	0	5.00486	0.596	0.01	0	0	Mlf1
Bcl9	0	2.8395	0.637	0.053	0	0	Bcl9
Slc25a12	0	2.09211	0.681	0.098	0	0	Slc25a12
Tmem65	0	2.14639	0.705	0.122	0	0	Tmem65
Mapk10	0	5.65687	0.589	0.007	0	0	Mapk10
Sesn1	0	1.6521	0.742	0.161	0	0	Sesn1
Lclat1	0	2.7529	0.642	0.062	0	0	Lclat1
Lrrc39	0	4.37839	0.595	0.015	0	0	Lrrc39
Reep1	0	4.03551	0.598	0.019	0	0	Reep1
Slk	0	1.56096	0.76	0.184	0	0	Slk
Gja1	0	2.37814	0.643	0.069	0	0	Gja1
Cyfip2	0	4.77216	0.584	0.01	0	0	Cyfip2
Retreg1	0	2.63901	0.624	0.052	0	0	Retreg1
Fbxo32	0	4.74628	0.587	0.015	0	0	Fbxo32
Svil	0	1.31906	0.913	0.342	0	0	Svil
Lrrc3b	0	2.22604	0.64	0.071	0	0	Lrrc3b
Nceh1	0	3.66761	0.596	0.027	0	0	Nceh1
Ifrd1	0	2.27086	0.647	0.079	0	0	Ifrd1
Homer2	0	5.4125	0.575	0.007	0	0	Homer2
Ghr	0	1.19738	0.948	0.38	0	0	Ghr
Slc20a2	0	2.39952	0.641	0.075	0	0	Slc20a2
Gm17276	0	2.786	0.62	0.054	0	0	Gm17276
Smpx	0	5.47963	0.572	0.008	0	0	Smpx
Pde3a	0	0.785253	0.839	0.277	0	0	Pde3a
Fbxo40	0	5.24752	0.568	0.006	0	0	Fbxo40
Pdzrn3	0	1.7917	0.683	0.122	0	0	Pdzrn3
Pde7a	0	2.50796	0.637	0.077	0	0	Pde7a
Efna5	0	1.3367	0.712	0.152	0	0	Efna5
Acox1	0	2.11732	0.648	0.09	0	0	Acox1
Epb41	0	0.878197	0.813	0.255	0	0	Epb41
Dpyd	0	1.90337	0.631	0.074	0	0	Dpyd
Rpl3l	0	5.30526	0.562	0.005	0	0	Rpl3l
Map3k20	0	1.16298	0.738	0.181	0	0	Map3k20
Zfp827	0	2.06669	0.638	0.082	0	0	Zfp827
Tead1	0	1.2103	0.832	0.278	0	0	Tead1
Tmem245	0	1.36119	0.74	0.187	0	0	Tmem245
Gm24474	0	5.11822	0.56	0.008	0	0	Gm24474
Hand2os1	0	3.29295	0.581	0.031	0	0	Hand2os1
Gk	0	4.2859	0.564	0.015	0	0	Gk
Acadm	0	2.59177	0.596	0.048	0	0	Acadm
Setbp1	0	0.762407	0.827	0.279	0	0	Setbp1
Asb18	0	5.60611	0.554	0.007	0	0	Asb18
Hdac4	0	1.64022	0.694	0.147	0	0	Hdac4
Snta1	0	3.7691	0.569	0.023	0	0	Snta1
Plscr2	0	2.31422	0.602	0.057	0	0	Plscr2
Vps13d	0	1.19062	0.81	0.266	0	0	Vps13d
Fam214a	0	1.78753	0.657	0.113	0	0	Fam214a
Ldhb	0	3.20241	0.574	0.03	0	0	Ldhb
Ctnna1	0	1.32977	0.855	0.313	0	0	Ctnna1
Arhgap21	0	1.00256	0.786	0.246	0	0	Arhgap21
Asb15	0	5.34194	0.546	0.006	0	0	Asb15
Filip1	0	0.931691	0.832	0.292	0	0	Filip1
Acat1	0	2.14461	0.618	0.079	0	0	Acat1
Camk2d	0	1.47191	0.93	0.392	0	0	Camk2d
Lgals4	0	3.97424	0.548	0.01	0	0	Lgals4
Yipf7	0	5.13682	0.544	0.007	0	0	Yipf7
Msrb3	0	0.977254	0.799	0.262	0	0	Msrb3
Hif1a	0	2.29492	0.614	0.078	0	0	Hif1a
Slc12a7	0	3.02101	0.575	0.039	0	0	Slc12a7
Pygm	0	2.74315	0.573	0.037	0	0	Pygm
Fgfr2	0	1.47108	0.793	0.258	0	0	Fgfr2
Med12l	0	3.35261	0.566	0.031	0	0	Med12l
4930402H24Rik	0	1.01058	0.873	0.34	0	0	4930402H24Rik
Tnik	0	0.928026	0.7	0.167	0	0	Tnik
Gm13481	0	6.18667	0.538	0.006	0	0	Gm13481
Ehd4	0	1.6735	0.635	0.104	0	0	Ehd4
Dnmt3a	0	1.17028	0.744	0.213	0	0	Dnmt3a
Kcnip2	0	5.38243	0.534	0.005	0	0	Kcnip2
Fam13a	0	3.75789	0.553	0.025	0	0	Fam13a
Ntn1	0	1.71909	0.64	0.112	0	0	Ntn1
Itgb1bp2	0	4.9538	0.536	0.008	0	0	Itgb1bp2
Dot1l	0	2.5005	0.581	0.054	0	0	Dot1l
Zfpm2	0	0.684673	0.939	0.412	0	0	Zfpm2
Cep85	0	3.07452	0.558	0.032	0	0	Cep85
Ube2g1	0	1.3165	0.706	0.18	0	0	Ube2g1
Gm47644	0	4.92863	0.537	0.012	0	0	Gm47644
Mir133a-1hg	0	4.58481	0.534	0.009	0	0	Mir133a-1hg
Zmynd8	0	1.15103	0.734	0.21	0	0	Zmynd8
Dag1	0	1.87986	0.625	0.101	0	0	Dag1
Hnrnpl	0	1.51624	0.652	0.129	0	0	Hnrnpl
Trak2	0	2.37141	0.594	0.072	0	0	Trak2
Gab1	0	0.971581	0.801	0.279	0	0	Gab1
Mdh1	0	2.78146	0.558	0.037	0	0	Mdh1
Atg10	0	1.4378	0.674	0.153	0	0	Atg10
Dip2c	0	1.50692	0.951	0.43	0	0	Dip2c
Plekha6	0	0.933236	0.685	0.167	0	0	Plekha6
Art3	0	1.23731	0.643	0.125	0	0	Art3
Klhl24	0	1.25604	0.674	0.156	0	0	Klhl24
Fsd1l	0	2.10319	0.596	0.079	0	0	Fsd1l
Miga2	0	4.13897	0.53	0.015	0	0	Miga2
Lgr6	0	4.89957	0.523	0.009	0	0	Lgr6
Slmap	0	1.16271	0.758	0.244	0	0	Slmap
Intu	0	4.48288	0.526	0.013	0	0	Intu
Apex2	0	3.14877	0.574	0.061	0	0	Apex2
Mapt	0	3.52038	0.535	0.024	0	0	Mapt
Pik3r1	0	1.14315	0.741	0.23	0	0	Pik3r1
Cox10	0	2.63798	0.556	0.046	0	0	Cox10
Pdzrn4	0	4.65921	0.521	0.011	0	0	Pdzrn4
Adprhl1	0	4.14899	0.523	0.014	0	0	Adprhl1
Angpt1	0	2.32986	0.619	0.11	0	0	Angpt1
Pfkm	0	4.18019	0.52	0.011	0	0	Pfkm
Kif1b	0	1.04439	0.821	0.313	0	0	Kif1b
Golga4	0	1.49894	0.651	0.143	0	0	Golga4
Adcy6	0	1.77464	0.587	0.08	0	0	Adcy6
Ppip5k1	0	2.83729	0.547	0.041	0	0	Ppip5k1
Pptc7	0	2.64213	0.552	0.046	0	0	Pptc7
Clip4	0	4.92067	0.513	0.009	0	0	Clip4
Csrp3	0	3.83321	0.517	0.014	0	0	Csrp3
Fnip1	0	1.01122	0.728	0.225	0	0	Fnip1
Trak1	0	0.962863	0.838	0.336	0	0	Trak1
Ablim1	0	0.607104	0.963	0.461	0	0	Ablim1
Fxr1	0	1.17411	0.678	0.177	0	0	Fxr1
Arhgap10	0	0.706096	0.764	0.263	0	0	Arhgap10
Rhot1	0	1.45224	0.624	0.124	0	0	Rhot1
Prox1	0	3.13614	0.516	0.017	0	0	Prox1
Zfp445	0	1.37957	0.65	0.151	0	0	Zfp445
Lpin1	0	3.62818	0.525	0.026	0	0	Lpin1
Zbtb16	0	0.852459	0.812	0.315	0	0	Zbtb16
Tlr4	0	2.73917	0.563	0.066	0	0	Tlr4
Ptprd	0	0.920258	0.654	0.158	0	0	Ptprd
Gm31013	0	5.92645	0.501	0.005	0	0	Gm31013
2210408F21Rik	0	1.84929	0.629	0.134	0	0	2210408F21Rik
Mia2	0	1.34777	0.651	0.156	0	0	Mia2
Map3k5	0	0.771599	0.757	0.263	0	0	Map3k5
Ripor2	0	2.1316	0.538	0.045	0	0	Ripor2
Shld1	0	4.15401	0.518	0.025	0	0	Shld1
Osbpl8	0	0.961357	0.711	0.218	0	0	Osbpl8
Ptgr2	0	3.39583	0.518	0.025	0	0	Ptgr2
Ubr5	0	0.894485	0.816	0.323	0	0	Ubr5
Synj2	0	2.63204	0.542	0.05	0	0	Synj2
Zfp697	0	2.88284	0.529	0.038	0	0	Zfp697
Idh2	0	1.76802	0.561	0.072	0	0	Idh2
Pgm5	0	1.4554	0.564	0.075	0	0	Pgm5
Aak1	0	0.791835	0.762	0.275	0	0	Aak1
Sptb	0	4.13696	0.5	0.014	0	0	Sptb
Kif13a	0	0.655103	0.767	0.281	0	0	Kif13a
Ppfia1	0	1.70977	0.582	0.097	0	0	Ppfia1
Sobp	0	0.770321	0.703	0.218	0	0	Sobp
Zfp106	0	1.46588	0.603	0.119	0	0	Zfp106
Ndufaf4	0	3.19406	0.51	0.026	0	0	Ndufaf4
Esrra	0	3.19691	0.508	0.024	0	0	Esrra
Appl2	0	1.99316	0.552	0.069	0	0	Appl2
Gpam	0	2.93793	0.516	0.033	0	0	Gpam
Qk	0	1.51585	0.944	0.462	0	0	Qk
Tnfaip8	0	0.979834	0.671	0.19	0	0	Tnfaip8
Pde7b	0	1.06997	0.698	0.217	0	0	Pde7b
Tom1	0	1.93	0.555	0.075	0	0	Tom1
Mtus1	0	0.918515	0.66	0.181	0	0	Mtus1
Etfdh	0	3.31193	0.503	0.025	0	0	Etfdh
Atp8a1	0	0.719884	0.673	0.196	0	0	Atp8a1
Rassf8	0	1.63064	0.576	0.1	0	0	Rassf8
Mpped2	0	1.78547	0.555	0.08	0	0	Mpped2
Aox1	0	2.21637	0.543	0.069	0	0	Aox1
Sacs	0	2.33084	0.526	0.052	0	0	Sacs
Pbx1	0	0.876989	0.94	0.466	0	0	Pbx1
Agtr1a	0	3.1626	0.5	0.027	0	0	Agtr1a
Ndufs4	0	1.02998	0.647	0.175	0	0	Ndufs4
Tom1l2	0	0.813282	0.739	0.267	0	0	Tom1l2
Stard7	0	2.59437	0.511	0.04	0	0	Stard7
Fbxw7	0	1.06778	0.661	0.19	0	0	Fbxw7
Ptpn3	0	2.15564	0.535	0.067	0	0	Ptpn3
Fgd4	0	1.4005	0.571	0.103	0	0	Fgd4
Dlat	0	2.23831	0.52	0.053	0	0	Dlat
Cpeb4	0	1.30019	0.612	0.145	0	0	Cpeb4
Ltbp1	0	0.674083	0.687	0.222	0	0	Ltbp1
Adamtsl5	0	2.73025	0.506	0.041	0	0	Adamtsl5
Atxn2	0	0.841794	0.705	0.24	0	0	Atxn2
Prickle1	0	1.13582	0.612	0.147	0	0	Prickle1
Slf1	0	1.66409	0.553	0.089	0	0	Slf1
Mgat5	0	0.914298	0.637	0.173	0	0	Mgat5
Hipk2	0	1.29681	0.578	0.114	0	0	Hipk2
Bzw2	0	1.93531	0.527	0.065	0	0	Bzw2
Tnnc1	0	1.05543	0.604	0.142	0	0	Tnnc1
Antxr2	0	0.904411	0.639	0.178	0	0	Antxr2
Gata6	0	2.13362	0.521	0.06	0	0	Gata6
Atf6	0	1.15409	0.627	0.166	0	0	Atf6
Zkscan3	0	1.18575	0.609	0.148	0	0	Zkscan3
Mpp5	0	1.70041	0.544	0.084	0	0	Mpp5
Lrpprc	0	1.80571	0.543	0.083	0	0	Lrpprc
Gm37240	0	0.960359	0.638	0.179	0	0	Gm37240
Rsrp1	0	0.676662	0.783	0.324	0	0	Rsrp1
Naca	0	2.0705	0.513	0.054	0	0	Naca
1010001N08Rik	0	2.37922	0.502	0.043	0	0	1010001N08Rik
Usp54	0	2.01306	0.521	0.068	0	0	Usp54
Pacsin2	0	0.974097	0.64	0.189	0	0	Pacsin2
Pcnt	0	1.97988	0.515	0.065	0	0	Pcnt
Kansl1l	0	0.642313	0.731	0.281	0	0	Kansl1l
Pkia	0	1.64692	0.537	0.089	0	0	Pkia
Map4	0	0.789332	0.868	0.42	0	0	Map4
Vps13a	0	0.841587	0.642	0.194	0	0	Vps13a
Lonp2	0	0.854845	0.654	0.208	0	0	Lonp2
Pcca	0	0.787219	0.656	0.21	0	0	Pcca
Mef2d	0	0.824291	0.631	0.185	0	0	Mef2d
Cdkal1	0	0.603315	0.787	0.341	0	0	Cdkal1
Uqcc1	0	1.72535	0.524	0.079	0	0	Uqcc1
Atp1a2	0	0.889447	0.602	0.157	0	0	Atp1a2
Hdlbp	0	1.14682	0.584	0.141	0	0	Hdlbp
Tef	0	1.07589	0.591	0.148	0	0	Tef
Nos1ap	0	1.65306	0.505	0.063	0	0	Nos1ap
Hipk3	0	1.03508	0.601	0.161	0	0	Hipk3
Trip11	0	0.707298	0.675	0.237	0	0	Trip11
Fam126a	0	1.15202	0.568	0.13	0	0	Fam126a
Fhit	0	1.17068	0.57	0.133	0	0	Fhit
Arfgef2	0	1.21769	0.561	0.125	0	0	Arfgef2
Sltm	0	0.662899	0.68	0.244	0	0	Sltm
Cnksr3	0	1.67301	0.522	0.086	0	0	Cnksr3
St3gal3	0	1.02059	0.571	0.136	0	0	St3gal3
Eps15l1	0	0.809185	0.624	0.19	0	0	Eps15l1
D5Ertd579e	0	0.96449	0.596	0.163	0	0	D5Ertd579e
Dcaf6	0	0.829549	0.633	0.201	0	0	Dcaf6
Slc25a3	0	0.903766	0.582	0.15	0	0	Slc25a3
Mapkapk2	0	1.25885	0.542	0.111	0	0	Mapkapk2
Tsc22d4	0	1.31315	0.54	0.11	0	0	Tsc22d4
Lpgat1	0	1.7041	0.509	0.079	0	0	Lpgat1
Dst	0	0.966272	0.945	0.517	0	0	Dst
Gse1	0	1.22463	0.584	0.156	0	0	Gse1
Aig1	0	0.641343	0.616	0.189	0	0	Aig1
Foxo3	0	0.788154	0.651	0.225	0	0	Foxo3
Urgcp	0	1.19327	0.545	0.119	0	0	Urgcp
Dnaja2	0	1.73466	0.503	0.077	0	0	Dnaja2
Lin52	0	1.066	0.553	0.128	0	0	Lin52
Agtpbp1	0	1.31665	0.562	0.137	0	0	Agtpbp1
Ndufs1	0	1.46483	0.51	0.085	0	0	Ndufs1
Mir99ahg	0	1.35804	0.754	0.329	0	0	Mir99ahg
Ube2b	0	1.32484	0.554	0.131	0	0	Ube2b
Osbpl1a	0	1.34664	0.524	0.103	0	0	Osbpl1a
Pitpnm2	0	0.895867	0.566	0.145	0	0	Pitpnm2
Dym	0	0.698574	0.613	0.194	0	0	Dym
Tmem131l	0	1.30395	0.509	0.092	0	0	Tmem131l
Mapre2	0	1.0064	0.58	0.168	0	0	Mapre2
Slain2	0	0.936682	0.558	0.149	0	0	Slain2
Acadl	0	1.45325	0.502	0.094	0	0	Acadl
Nsmaf	0	1.05806	0.529	0.121	0	0	Nsmaf
Larp4	0	1.21914	0.512	0.104	0	0	Larp4
Mgrn1	0	1.28432	0.51	0.102	0	0	Mgrn1
Ttc17	0	0.64901	0.605	0.198	0	0	Ttc17
Hibadh	0	0.826661	0.563	0.157	0	0	Hibadh
Gbe1	0	1.0023	0.531	0.126	0	0	Gbe1
Kcmf1	0	0.597761	0.618	0.214	0	0	Kcmf1
Schip1	0	0.715904	0.554	0.155	0	0	Schip1
Npepps	0	0.599167	0.606	0.208	0	0	Npepps
Txnip	0	1.49355	0.505	0.11	0	0	Txnip
Sdha	0	0.910924	0.522	0.127	0	0	Sdha
Pkig	0	0.824621	0.533	0.139	0	0	Pkig
Cecr2	0	0.690701	0.525	0.131	0	0	Cecr2
Cdc37l1	0	0.710753	0.568	0.174	0	0	Cdc37l1
Luc7l2	0	0.975073	0.955	0.566	0	0	Luc7l2
Ppp6r2	0	0.797034	0.54	0.152	0	0	Ppp6r2
Clcn3	0	0.860009	0.521	0.134	0	0	Clcn3
Son	0	0.645123	0.91	0.524	0	0	Son
St7	0	0.683649	0.562	0.177	0	0	St7
Dcaf8	0	0.64853	0.564	0.179	0	0	Dcaf8
Il15	0	0.84587	0.556	0.177	0	0	Il15
Pakap	0	0.725006	0.509	0.13	0	0	Pakap
Afg1l	0	0.626695	0.547	0.168	0	0	Afg1l
Srrm1	0	0.593998	0.569	0.19	0	0	Srrm1
Akap8l	0	0.854427	0.51	0.132	0	0	Akap8l
Myl2	0	0.863018	0.524	0.153	0	0	Myl2
Slc38a2	0	0.955604	0.552	0.183	0	0	Slc38a2
Yap1	0	0.805552	0.514	0.147	0	0	Yap1
Lncpint	0	0.781912	0.927	0.573	0	0	Lncpint
Slc25a36	0	0.648852	0.503	0.154	0	0	Slc25a36
Gm26917	0	0.773504	0.575	0.283	0	0	Gm26917
Malat1	0	1.31344	1	0.971	0	0	Malat1

## Sheet: 1(EC-cap)
EC-cap	p_val	avg_log2FC	pct.1	pct.2	p_val_adj	cluster	gene
Flt1	0	4.94746	0.846	0.043	0	1	Flt1
Cyyr1	0	5.04233	0.838	0.038	0	1	Cyyr1
Adgrl4	0	5.60009	0.823	0.034	0	1	Adgrl4
Plcb1	0	4.46951	0.833	0.062	0	1	Plcb1
Ptprb	0	4.62381	0.793	0.044	0	1	Ptprb
Fabp4	0	5.46052	0.772	0.041	0	1	Fabp4
Prkch	0	4.18668	0.787	0.07	0	1	Prkch
Fli1	0	3.51413	0.876	0.16	0	1	Fli1
Itpkb	0	4.11193	0.847	0.133	0	1	Itpkb
Adgrf5	0	4.50556	0.773	0.06	0	1	Adgrf5
Ccdc85a	0	7.01014	0.724	0.012	0	1	Ccdc85a
Shank3	0	4.77315	0.718	0.038	0	1	Shank3
Tmtc2	0	4.49661	0.716	0.04	0	1	Tmtc2
Sema6a	0	3.89278	0.767	0.101	0	1	Sema6a
Dach1	0	4.38606	0.781	0.121	0	1	Dach1
Arhgap31	0	3.1963	0.816	0.161	0	1	Arhgap31
Kitl	0	4.19118	0.741	0.091	0	1	Kitl
Itga6	0	5.37492	0.687	0.038	0	1	Itga6
Egfl7	0	4.71193	0.684	0.036	0	1	Egfl7
Dock9	0	3.40361	0.754	0.109	0	1	Dock9
Nav3	0	5.45788	0.662	0.038	0	1	Nav3
Pecam1	0	3.55315	0.651	0.053	0	1	Pecam1
St6galnac3	0	3.48498	0.645	0.049	0	1	St6galnac3
Lims2	0	4.3613	0.653	0.057	0	1	Lims2
Ablim3	0	5.11107	0.623	0.032	0	1	Ablim3
Emcn	0	4.28129	0.624	0.036	0	1	Emcn
Mgll	0	4.42095	0.669	0.093	0	1	Mgll
Ldb2	0	3.05063	0.637	0.066	0	1	Ldb2
Mecom	0	1.86117	0.784	0.228	0	1	Mecom
Etl4	0	3.80221	0.886	0.331	0	1	Etl4
Cav1	0	4.56639	0.592	0.037	0	1	Cav1
Mcc	0	3.25805	0.679	0.135	0	1	Mcc
Myo1d	0	3.28633	0.659	0.116	0	1	Myo1d
Tshz2	0	2.40697	0.783	0.241	0	1	Tshz2
Adamts9	0	4.5698	0.64	0.098	0	1	Adamts9
Plcb4	0	3.58434	0.905	0.367	0	1	Plcb4
Rasgrp3	0	4.03051	0.602	0.066	0	1	Rasgrp3
Kdr	0	5.38461	0.557	0.022	0	1	Kdr
Mcf2l	0	5.56605	0.55	0.016	0	1	Mcf2l
Elk3	0	3.27198	0.616	0.099	0	1	Elk3
Nrp2	0	3.94333	0.583	0.068	0	1	Nrp2
Ets1	0	2.92258	0.655	0.142	0	1	Ets1
Tspan7	0	4.67049	0.579	0.068	0	1	Tspan7
Cdh5	0	4.88384	0.536	0.026	0	1	Cdh5
Ushbp1	0	4.98181	0.528	0.021	0	1	Ushbp1
Myo10	0	3.8516	0.638	0.133	0	1	Myo10
Fbxl7	0	2.28197	0.733	0.232	0	1	Fbxl7
Fgd5	0	4.01966	0.542	0.042	0	1	Fgd5
Prex2	0	1.94343	0.761	0.262	0	1	Prex2
Eng	0	3.06719	0.589	0.095	0	1	Eng
Samd12	0	4.03913	0.524	0.032	0	1	Samd12
Slc28a2	0	5.40973	0.51	0.019	0	1	Slc28a2
Rasgrf2	0	4.08689	0.518	0.028	0	1	Rasgrf2
Dgkh	0	3.06246	0.6	0.114	0	1	Dgkh
Erg	0	4.40344	0.509	0.03	0	1	Erg
Lrrc8c	0	3.27475	0.577	0.099	0	1	Lrrc8c
Ebf1	0	0.680764	0.823	0.358	0	1	Ebf1
Nxpe4	0	3.53256	0.535	0.072	0	1	Nxpe4
Dnm3	0	3.34522	0.56	0.098	0	1	Dnm3
Pdgfd	0	2.82425	0.704	0.243	0	1	Pdgfd
Itga1	0	2.24433	0.622	0.169	0	1	Itga1
Elmo1	0	1.52195	0.715	0.264	0	1	Elmo1
Rapgef5	0	2.62506	0.627	0.177	0	1	Rapgef5
Arhgap18	0	3.12258	0.607	0.157	0	1	Arhgap18
Zbtb46	0	3.68832	0.519	0.083	0	1	Zbtb46
Col4a1	0	2.52792	0.624	0.19	0	1	Col4a1
Galnt18	0	2.85024	0.605	0.172	0	1	Galnt18
Oxr1	0	2.72406	0.71	0.294	0	1	Oxr1
Tcf4	0	2.27212	0.938	0.522	0	1	Tcf4
Xdh	0	2.84272	0.546	0.131	0	1	Xdh
Tek	0	2.61551	0.517	0.114	0	1	Tek
App	0	1.69049	0.652	0.254	0	1	App
Bmp6	0	2.82587	0.504	0.108	0	1	Bmp6
Afdn	0	2.96465	0.689	0.294	0	1	Afdn
Eepd1	0	3.91969	0.503	0.109	0	1	Eepd1
Rapgef1	0	2.8962	0.711	0.318	0	1	Rapgef1
Dock4	0	2.67434	0.79	0.398	0	1	Dock4
Plpp3	0	2.6114	0.568	0.179	0	1	Plpp3
Magi1	0	2.62123	0.863	0.476	0	1	Magi1
Hspg2	0	2.51281	0.642	0.262	0	1	Hspg2
Lyn	0	1.62256	0.52	0.147	0	1	Lyn
Stox2	0	2.90081	0.776	0.403	0	1	Stox2
Tanc1	0	2.55716	0.668	0.3	0	1	Tanc1
Syne2	0	2.0063	0.553	0.191	0	1	Syne2
Vav3	0	1.45801	0.577	0.216	0	1	Vav3
Nav1	0	1.333	0.609	0.251	0	1	Nav1
Plekhg1	0	2.47871	0.544	0.188	0	1	Plekhg1
Pitpnc1	0	2.48373	0.828	0.475	0	1	Pitpnc1
AY036118	0	1.46422	0.76	0.41	0	1	AY036118
Nedd9	0	2.39907	0.539	0.201	0	1	Nedd9
Klf7	0	2.04637	0.642	0.314	0	1	Klf7
Snrk	0	2.33285	0.65	0.323	0	1	Snrk
Cdk17	0	2.39156	0.539	0.214	0	1	Cdk17
Apbb2	0	2.46347	0.856	0.534	0	1	Apbb2
Akt3	0	1.36435	0.596	0.279	0	1	Akt3
Ptprg	0	2.92197	0.944	0.635	0	1	Ptprg
4931406P16Rik	0	2.43048	0.543	0.237	0	1	4931406P16Rik
Syne1	0	2.31478	0.752	0.446	0	1	Syne1
Maml2	0	0.753993	0.692	0.386	0	1	Maml2
Ptk2	0	2.04297	0.697	0.397	0	1	Ptk2
Ptprm	0	2.32876	0.961	0.661	0	1	Ptprm
Rftn1	0	2.36643	0.675	0.377	0	1	Rftn1
Col4a2	0	2.48941	0.604	0.306	0	1	Col4a2
Adgrl2	0	2.61543	0.671	0.377	0	1	Adgrl2
Lrmda	0	1.99847	0.615	0.321	0	1	Lrmda
Cd36	0	1.69869	0.808	0.515	0	1	Cd36
Dennd5b	0	2.38255	0.545	0.259	0	1	Dennd5b
Ablim11	0	1.2729	0.877	0.594	0	1	Ablim1
Plxna2	0	2.46167	0.616	0.343	0	1	Plxna2
Wasf2	0	1.69095	0.56	0.289	0	1	Wasf2
Gm42418	0	1.17802	0.904	0.639	0	1	Gm42418
Srgap2	0	1.5739	0.635	0.378	0	1	Srgap2
Rasal2	0	2.05362	0.776	0.52	0	1	Rasal2
Ttc28	0	1.48666	0.659	0.408	0	1	Ttc28
Dock1	0	1.65688	0.677	0.428	0	1	Dock1
Cep85l	0	2.36268	0.517	0.268	0	1	Cep85l
Tmcc3	0	1.27121	0.557	0.311	0	1	Tmcc3
Hdac9	0	2.63806	0.71	0.464	0	1	Hdac9
Map4k3	0	2.12708	0.587	0.343	0	1	Map4k3
Pkp4	0	2.43437	0.589	0.361	0	1	Pkp4
Cdh131	0	1.00733	0.758	0.535	0	1	Cdh13
Arhgef3	0	1.79486	0.618	0.414	0	1	Arhgef3
Camk1d	0	1.06169	0.648	0.447	0	1	Camk1d
Wwtr1	0	1.88963	0.546	0.349	0	1	Wwtr1
Rapgef2	0	1.42234	0.754	0.564	0	1	Rapgef2
Lama4	0	1.47072	0.557	0.371	0	1	Lama4
Dysf	0	1.79012	0.6	0.418	0	1	Dysf
Numb	0	1.72517	0.516	0.341	0	1	Numb
Cyth1	0	1.96442	0.523	0.354	0	1	Cyth1
Phlpp1	0	1.78925	0.61	0.444	0	1	Phlpp1
Picalm	0	1.63419	0.656	0.494	0	1	Picalm
Nrp1	0	1.53777	0.785	0.624	0	1	Nrp1
Arhgap29	0	1.74178	0.553	0.403	0	1	Arhgap29
Ccny	0	1.6703	0.527	0.386	0	1	Ccny
Heg1	0	1.00998	0.661	0.521	0	1	Heg1
Arl15	0	1.09252	0.643	0.507	0	1	Arl15
Clic4	0	1.79827	0.505	0.371	0	1	Clic4
Mef2c	0	1.18901	0.643	0.518	0	1	Mef2c
Fcho2	0	1.28123	0.537	0.433	0	1	Fcho2
Sptbn1	0	1.2292	0.917	0.814	0	1	Sptbn1
Ext1	0	1.10744	0.76	0.675	0	1	Ext1
Sgms1	0	1.41693	0.607	0.526	0	1	Sgms1
Utrn	0	1.00582	0.726	0.646	0	1	Utrn
Pakap.1	0	1.39776	0.538	0.469	0	1	Pakap.1
Gnaq	0	0.822386	0.596	0.531	0	1	Gnaq
Fry	0	0.950663	0.672	0.608	0	1	Fry
Tcf12	0	1.03609	0.672	0.615	0	1	Tcf12
Peak1	0	0.977772	0.605	0.568	0	1	Peak1
Ralgapa1	0	1.1033	0.64	0.608	0	1	Ralgapa1
Trio	0	1.11943	0.544	0.517	0	1	Trio
Gphn	0	0.880121	0.727	0.751	0	1	Gphn
Nfib	0	0.732874	0.74	0.725	0	1	Nfib
Etv6	3.10431e-301	1.08431	0.534	0.461	1.03752e-296	1	Etv6
Baz2b	2.54057e-257	0.793836	0.615	0.64	8.49108e-253	1	Baz2b
Cped1	8.1621e-253	0.635509	0.652	0.668	2.72794e-248	1	Cped1
Lrch1	2.49003e-216	1.02621	0.501	0.475	8.32218e-212	1	Lrch1
Arhgef12	1.58322e-209	0.740675	0.619	0.665	5.29143e-205	1	Arhgef12
Stag1	1.30683e-198	0.773815	0.561	0.521	4.3677e-194	1	Stag1
Ptprk	7.94618e-194	0.738236	0.514	0.477	2.65577e-189	1	Ptprk
Atxn1	9.22336e-188	0.603683	0.676	0.706	3.08263e-183	1	Atxn1
Spag9	3.95151e-178	0.790209	0.565	0.599	1.32067e-173	1	Spag9
Ppp3ca	8.09472e-178	0.626482	0.614	0.637	2.70542e-173	1	Ppp3ca
Nbeal1	4.02102e-152	0.814993	0.555	0.599	1.34391e-147	1	Nbeal1
Prkce	1.04371e-105	0.654812	0.576	0.618	3.48829e-101	1	Prkce
Pard3b	1.17877e-102	0.701643	0.616	0.689	3.93968e-98	1	Pard3b
Diaph2	7.43377e-86	0.603073	0.614	0.687	2.48451e-81	1	Diaph2
Cmss1	3.50565e-73	1.0105	0.63	0.686	1.17166e-68	1	Cmss1
Sbf2	5.94402e-72	0.605778	0.57	0.647	1.98661e-67	1	Sbf2
Klf12	2.01883e-55	0.742817	0.52	0.586	6.74733e-51	1	Klf12
Exoc6b	5.02738e-32	0.633798	0.482	0.521	1.68025e-27	1	Exoc6b
Pan3	4.49228e-26	0.667454	0.484	0.538	1.50141e-21	1	Pan3

## Sheet: 2(FB)
FB	p_val	avg_log2FC	pct.1	pct.2	p_val_adj	cluster	gene
Pcdh9	0	8.26444	0.922	0.008	0	2	Pcdh9
Bicc1	0	5.7201	0.933	0.062	0	2	Bicc1
Abca8a	0	5.31989	0.932	0.062	0	2	Abca8a
Gpc6	0	3.24769	0.968	0.11	0	2	Gpc6
Kcnt2	0	4.16065	0.906	0.073	0	2	Kcnt2
Tenm3	0	6.4489	0.838	0.012	0	2	Tenm3
Rbms3	0	3.1634	0.957	0.167	0	2	Rbms3
Sox5	0	3.06027	0.9	0.111	0	2	Sox5
Dcn	0	6.77483	0.78	0.014	0	2	Dcn
Tnxb	0	5.99846	0.775	0.022	0	2	Tnxb
Ebf2	0	3.25564	0.842	0.09	0	2	Ebf2
Plxdc2	0	3.3197	0.882	0.138	0	2	Plxdc2
Gsn	0	5.66427	0.728	0.031	0	2	Gsn
C1qtnf7	0	7.45921	0.693	0.007	0	2	C1qtnf7
Negr1	0	6.29945	0.694	0.013	0	2	Negr1
Pcsk6	0	6.0608	0.696	0.017	0	2	Pcsk6
Eda	0	4.35741	0.723	0.056	0	2	Eda
Naaladl2	0	7.81785	0.67	0.01	0	2	Naaladl2
Gpm6b	0	6.82622	0.65	0.006	0	2	Gpm6b
Col8a1	0	5.02303	0.672	0.036	0	2	Col8a1
Meg3	0	4.72013	0.661	0.033	0	2	Meg3
Pde1a	0	3.64175	0.688	0.063	0	2	Pde1a
Thsd7a	0	3.43662	0.714	0.089	0	2	Thsd7a
Arhgap24	0	5.05469	0.733	0.11	0	2	Arhgap24
Egfr	0	4.85169	0.658	0.035	0	2	Egfr
Smoc2	0	7.40538	0.633	0.014	0	2	Smoc2
Htra3	0	7.77465	0.62	0.002	0	2	Htra3
Sulf1	0	4.06919	0.645	0.037	0	2	Sulf1
Abca8b	0	4.60599	0.642	0.036	0	2	Abca8b
Trps1	0	2.29997	0.812	0.209	0	2	Trps1
Foxp2	0	4.32305	0.727	0.126	0	2	Foxp2
Scn7a	0	3.98945	0.629	0.029	0	2	Scn7a
Lamc1	0	3.22983	0.84	0.246	0	2	Lamc1
Adamts5	0	5.95668	0.609	0.018	0	2	Adamts5
Ddr2	0	4.31303	0.628	0.042	0	2	Ddr2
Aldh1a1	0	6.61446	0.593	0.007	0	2	Aldh1a1
Col3a1	0	5.30129	0.606	0.023	0	2	Col3a1
Mecom1	0	1.13707	0.842	0.263	0	2	Mecom
Ngf	0	3.51066	0.643	0.064	0	2	Ngf
Col15a1	0	4.50697	0.616	0.038	0	2	Col15a1
Sdc2	0	4.03218	0.673	0.098	0	2	Sdc2
Adamts10	0	3.69481	0.638	0.066	0	2	Adamts10
Lpar1	0	6.4432	0.58	0.008	0	2	Lpar1
Mir100hg	0	3.72897	0.768	0.203	0	2	Mir100hg
Gulp1	0	2.32923	0.704	0.149	0	2	Gulp1
Col5a2	0	3.44929	0.613	0.061	0	2	Col5a2
Ebf11	0	1.11903	0.926	0.377	0	2	Ebf1
Pid1	0	0.941156	0.7	0.161	0	2	Pid1
Lsamp	0	3.59777	0.59	0.054	0	2	Lsamp
Abi3bp	0	5.12828	0.549	0.015	0	2	Abi3bp
Itgbl1	0	5.62141	0.545	0.012	0	2	Itgbl1
Sh3d19	0	2.99065	0.65	0.12	0	2	Sh3d19
Slit3	0	4.37943	0.576	0.047	0	2	Slit3
Pdgfra	0	8.25157	0.53	0.002	0	2	Pdgfra
Bmper	0	7.8066	0.535	0.009	0	2	Bmper
Lhfp	0	2.6075	0.886	0.361	0	2	Lhfp
Rhoj	0	2.27255	0.739	0.214	0	2	Rhoj
Abca6	0	5.13295	0.549	0.025	0	2	Abca6
Fstl1	0	3.96379	0.573	0.055	0	2	Fstl1
Ust	0	3.73397	0.576	0.063	0	2	Ust
Ar	0	4.69804	0.539	0.028	0	2	Ar
Gli3	0	3.86022	0.547	0.043	0	2	Gli3
B3galt1	0	3.23905	0.646	0.143	0	2	B3galt1
Slit2	0	5.06661	0.513	0.015	0	2	Slit2
Lrp1	0	3.47419	0.551	0.054	0	2	Lrp1
Cfh	0	2.09358	0.6	0.103	0	2	Cfh
Antxr1	0	5.32629	0.507	0.016	0	2	Antxr1
Zeb2	0	1.19934	0.817	0.329	0	2	Zeb2
Maml21	0	1.38826	0.865	0.378	0	2	Maml2
Slc1a5	0	4.52663	0.509	0.027	0	2	Slc1a5
Nav11	0	1.51708	0.732	0.257	0	2	Nav1
Gucy1a2	0	1.66182	0.561	0.094	0	2	Gucy1a2
Slc43a3	0	2.9296	0.572	0.106	0	2	Slc43a3
Fbn1	0	2.32297	0.621	0.161	0	2	Fbn1
Fgfr1	0	3.59504	0.529	0.071	0	2	Fgfr1
Mast4	0	1.69639	0.923	0.468	0	2	Mast4
Cyth3	0	2.65454	0.672	0.219	0	2	Cyth3
Celf21	0	1.8826	0.967	0.518	0	2	Celf2
Atp8b1	0	2.939	0.519	0.083	0	2	Atp8b1
Lama2	0	2.0942	0.954	0.526	0	2	Lama2
Fkbp5	0	2.94113	0.505	0.078	0	2	Fkbp5
Sntb2	0	2.36264	0.546	0.13	0	2	Sntb2
Prex21	0	0.836568	0.726	0.31	0	2	Prex2
Agmo	0	1.98655	0.551	0.137	0	2	Agmo
Tshz3	0	2.38339	0.512	0.101	0	2	Tshz3
Nid1	0	2.57002	0.517	0.107	0	2	Nid1
Akt31	0	1.13084	0.697	0.287	0	2	Akt3
Epb41l2	0	1.51923	0.612	0.206	0	2	Epb41l2
Sept11	0	2.08712	0.541	0.136	0	2	2024-09-11
Zeb1	0	2.48315	0.927	0.522	0	2	Zeb1
Igfbp7	0	1.38933	0.593	0.197	0	2	Igfbp7
Wipf1	0	1.48819	0.601	0.213	0	2	Wipf1
Cdk14	0	1.49811	0.624	0.237	0	2	Cdk14
Fbxl71	0	0.768766	0.671	0.285	0	2	Fbxl7
Vav31	0	1.15872	0.623	0.237	0	2	Vav3
Ror1	0	2.07499	0.719	0.343	0	2	Ror1
Lrrk1	0	2.04464	0.511	0.141	0	2	Lrrk1
Gab2	0	1.93987	0.872	0.503	0	2	Gab2
Eps15	0	1.79686	0.544	0.185	0	2	Eps15
Prickle2	0	1.39449	0.531	0.174	0	2	Prickle2
Mid1	0	2.38529	0.663	0.31	0	2	Mid1
Arhgap6	0	1.59544	0.735	0.398	0	2	Arhgap6
Zfpm21	0	1.26278	0.891	0.568	0	2	Zfpm2
Fndc3b	0	1.97489	0.828	0.506	0	2	Fndc3b
Sgcd	0	2.38151	0.775	0.461	0	2	Sgcd
Tcf7l1	0	1.5863	0.572	0.258	0	2	Tcf7l1
Atrnl1	0	1.81258	0.799	0.486	0	2	Atrnl1
Rora	0	2.11999	0.98	0.677	0	2	Rora
Cpq	0	1.81868	0.716	0.415	0	2	Cpq
Mir99ahg1	0	0.731106	0.747	0.449	0	2	Mir99ahg
Gls	0	1.52715	0.55	0.254	0	2	Gls
Ldlrad4	0	1.73946	0.753	0.463	0	2	Ldlrad4
Ghr1	0	1.15051	0.841	0.559	0	2	Ghr
Lama41	0	1.11752	0.65	0.369	0	2	Lama4
Ttc281	0	0.925104	0.7	0.421	0	2	Ttc28
Kif13b	0	1.90464	0.578	0.305	0	2	Kif13b
Cdk8	0	1.18882	0.75	0.478	0	2	Cdk8
Tbx20	0	2.38711	0.57	0.298	0	2	Tbx20
Cask	0	1.49304	0.511	0.24	0	2	Cask
Sash1	0	1.00466	0.554	0.284	0	2	Sash1
Lima1	0	1.67561	0.516	0.253	0	2	Lima1
Plekha61	0	1.9363	0.591	0.33	0	2	Plekha6
Fndc3a	0	1.51243	0.52	0.266	0	2	Fndc3a
Ssbp2	0	1.6791	0.592	0.344	0	2	Ssbp2
Tacc1	0	1.24689	0.517	0.276	0	2	Tacc1
Tgfbr3	0	1.65275	0.617	0.385	0	2	Tgfbr3
Crtc3	0	1.74274	0.508	0.276	0	2	Crtc3
Heg11	0	1.13582	0.745	0.517	0	2	Heg1
Zfp521	0	1.42486	0.681	0.457	0	2	Zfp521
Ptprd1	0	1.77595	0.54	0.318	0	2	Ptprd
Esyt2	0	1.44915	0.522	0.303	0	2	Esyt2
Pam	0	1.28374	0.723	0.508	0	2	Pam
Man1a	0	1.46879	0.528	0.314	0	2	Man1a
Setbp11	0	1.1644	0.673	0.461	0	2	Setbp1
Tnik1	0	1.77579	0.552	0.344	0	2	Tnik
Eif4g3	0	1.19363	0.603	0.401	0	2	Eif4g3
Airn	0	1.15503	0.794	0.593	0	2	Airn
Chd9	0	1.2941	0.747	0.548	0	2	Chd9
Stag11	0	0.909397	0.694	0.499	0	2	Stag1
Pard3b1	0	1.03987	0.835	0.642	0	2	Pard3b
St5	0	1.14921	0.521	0.329	0	2	St5
Igf2r	0	1.3942	0.528	0.336	0	2	Igf2r
Sec24d	0	1.54244	0.528	0.343	0	2	Sec24d
Ncoa1	0	1.32835	0.621	0.439	0	2	Ncoa1
Plekha5	0	1.44443	0.581	0.399	0	2	Plekha5
Arhgap211	0	1.24247	0.61	0.43	0	2	Arhgap21
Nktr	0	1.27393	0.569	0.395	0	2	Nktr
Igf1r	0	1.0232	0.686	0.516	0	2	Igf1r
Tnpo1	0	1.29905	0.5	0.332	0	2	Tnpo1
Nfia	0	1.31294	0.938	0.77	0	2	Nfia
Nfix	0	1.49877	0.506	0.34	0	2	Nfix
Rbms1	0	0.897646	0.836	0.683	0	2	Rbms1
Fam172a	0	0.819724	0.626	0.477	0	2	Fam172a
Hivep2	0	1.09439	0.698	0.549	0	2	Hivep2
Phf21a	0	0.931577	0.645	0.504	0	2	Phf21a
Ube2e2	0	1.03709	0.653	0.512	0	2	Ube2e2
Sobp1	0	1.22257	0.526	0.387	0	2	Sobp
Auts2	0	0.596895	0.789	0.651	0	2	Auts2
Cped11	0	0.78833	0.776	0.644	0	2	Cped1
Dnajc1	0	0.961399	0.592	0.464	0	2	Dnajc1
Meis1	0	1.18764	0.512	0.386	0	2	Meis1
Itpr1	0	0.995874	0.706	0.586	0	2	Itpr1
Zbtb161	0	0.852958	0.61	0.492	0	2	Zbtb16
Pard3	0	0.703277	0.613	0.506	0	2	Pard3
Ogt	0	0.853338	0.565	0.47	0	2	Ogt
Akap13	0	0.776999	0.728	0.639	0	2	Akap13
Nedd4	0	0.64591	0.659	0.576	0	2	Nedd4
Zbtb20	0	0.626095	0.981	0.898	0	2	Zbtb20
Asap1	0	0.693131	0.699	0.619	0	2	Asap1
Zcchc7	0	0.648564	0.662	0.597	0	2	Zcchc7
Ssh2	0	0.671899	0.7	0.651	0	2	Ssh2
Pten	1.0551e-286	0.714528	0.505	0.376	3.52636e-282	2	Pten
Setd5	8.65923e-272	0.685433	0.588	0.504	2.89409e-267	2	Setd5
Ddx17	6.10006e-237	0.708396	0.565	0.49	2.03876e-232	2	Ddx17
Kmt2e	4.1005e-170	0.588187	0.573	0.535	1.37047e-165	2	Kmt2e
Nsd3	3.51156e-165	0.654931	0.524	0.467	1.17363e-160	2	Nsd3
Osbpl9	2.03592e-158	0.736173	0.501	0.451	6.80445e-154	2	Osbpl9
Tcf7l2	2.10838e-118	0.630587	0.522	0.489	7.04663e-114	2	Tcf7l2

## Sheet: 3(PER)
PER	p_val	avg_log2FC	pct.1	pct.2	p_val_adj	cluster	gene
Trpc3	0	7.97757	0.956	0.013	0	3	Trpc3
Pdgfrb	0	5.76875	0.904	0.046	0	3	Pdgfrb
Pde8b	0	8.64121	0.862	0.007	0	3	Pde8b
Ano1	0	6.251	0.825	0.011	0	3	Ano1
Notch3	0	5.0509	0.866	0.054	0	3	Notch3
Rgs5	0	5.40683	0.84	0.033	0	3	Rgs5
Gpc61	0	2.44681	0.977	0.187	0	3	Gpc6
Gucy1a21	0	3.94438	0.887	0.111	0	3	Gucy1a2
Plcl1	0	4.33987	0.962	0.198	0	3	Plcl1
Mdga2	0	7.81384	0.768	0.008	0	3	Mdga2
Myo1b	0	3.69027	0.898	0.15	0	3	Myo1b
Serpini1	0	6.49165	0.745	0.014	0	3	Serpini1
Rerg	0	7.80296	0.735	0.006	0	3	Rerg
Adgrl3	0	3.57472	0.813	0.092	0	3	Adgrl3
Mrvi1	0	4.44872	0.766	0.049	0	3	Mrvi1
Ebf21	0	2.55983	0.869	0.156	0	3	Ebf2
Rbms31	0	2.26171	0.943	0.24	0	3	Rbms3
Sox51	0	2.04846	0.872	0.185	0	3	Sox5
Abcc9	0	4.87112	0.985	0.318	0	3	Abcc9
Lin7a	0	8.38171	0.663	0.003	0	3	Lin7a
Pid11	0	1.77438	0.855	0.198	0	3	Pid1
Slc24a3	0	4.66131	0.692	0.045	0	3	Slc24a3
Morrbid	0	3.73651	0.733	0.092	0	3	Morrbid
Slc12a2	0	4.60007	0.717	0.078	0	3	Slc12a2
Dtx3	0	4.51968	0.681	0.05	0	3	Dtx3
Tbc1d1	0	3.53727	0.726	0.098	0	3	Tbc1d1
Sgip1	0	4.43541	0.664	0.048	0	3	Sgip1
Cacnb4	0	4.88931	0.644	0.029	0	3	Cacnb4
Cald1	0	2.61394	0.831	0.216	0	3	Cald1
Plxdc21	0	1.94874	0.821	0.211	0	3	Plxdc2
Gucy1b1	0	4.86088	0.641	0.034	0	3	Gucy1b1
Nrxn1	0	7.34943	0.612	0.006	0	3	Nrxn1
Ppfia2	0	5.04545	0.627	0.03	0	3	Ppfia2
Egflam	0	5.26241	0.636	0.042	0	3	Egflam
Adap2	0	2.95577	0.695	0.108	0	3	Adap2
Eps8	0	2.91307	0.717	0.136	0	3	Eps8
Kcnj8	0	8.67861	0.582	0.002	0	3	Kcnj8
Ebf12	0	2.19497	0.989	0.422	0	3	Ebf1
Gucy1a1	0	4.13151	0.603	0.04	0	3	Gucy1a1
Itga11	0	2.07204	0.793	0.231	0	3	Itga1
Chn1	0	3.70558	0.746	0.186	0	3	Chn1
Dock6	0	2.80364	0.668	0.134	0	3	Dock6
Carmn	0	3.66964	0.665	0.134	0	3	Carmn
Opcml	0	7.1547	0.534	0.007	0	3	Opcml
Aspn	0	4.59953	0.56	0.034	0	3	Aspn
Sema5a	0	3.82523	0.582	0.062	0	3	Sema5a
Arhgef17	0	4.28834	0.606	0.093	0	3	Arhgef17
Cspg4	0	5.65281	0.535	0.025	0	3	Cspg4
Plxdc1	0	5.42415	0.525	0.019	0	3	Plxdc1
Tshz21	0	1.31202	0.832	0.327	0	3	Tshz2
Zeb21	0	1.69364	0.873	0.369	0	3	Zeb2
Map2	0	3.80938	0.553	0.05	0	3	Map2
Lhfp1	0	2.08167	0.909	0.407	0	3	Lhfp
Il34	0	6.47855	0.503	0.007	0	3	Il34
Nostrin	0	3.03546	0.569	0.079	0	3	Nostrin
Mast41	0	2.85389	0.991	0.504	0	3	Mast4
4833422C13Rik	0	6.00424	0.504	0.019	0	3	4833422C13Rik
Epb41l21	0	2.06556	0.714	0.235	0	3	Epb41l2
Errfi1	0	2.1685	0.574	0.096	0	3	Errfi1
Prkg1	0	3.24639	0.993	0.52	0	3	Prkg1
Sntb1	0	3.17329	0.552	0.086	0	3	Sntb1
Gnb4	0	3.61217	0.526	0.063	0	3	Gnb4
Dennd2a	0	2.94862	0.558	0.097	0	3	Dennd2a
Gjc1	0	3.8746	0.552	0.093	0	3	Gjc1
Lsamp1	0	2.30266	0.56	0.105	0	3	Lsamp
Arhgap61	0	2.31193	0.872	0.418	0	3	Arhgap6
Sept111	0	2.18385	0.619	0.167	0	3	2024-09-11
Plce1	0	2.62938	0.78	0.329	0	3	Plce1
Limd1	0	3.00085	0.657	0.207	0	3	Limd1
Pten1	0	2.64473	0.812	0.364	0	3	Pten
Ngf1	0	2.07862	0.569	0.123	0	3	Ngf
Ptprk1	0	2.64555	0.894	0.454	0	3	Ptprk
Maml22	0	1.13537	0.861	0.423	0	3	Maml2
Trps11	0	1.21913	0.707	0.272	0	3	Trps1
Fap	0	2.65239	0.519	0.086	0	3	Fap
Cacna1a	0	3.5577	0.505	0.077	0	3	Cacna1a
Farp1	0	2.30411	0.641	0.214	0	3	Farp1
Prickle21	0	1.85253	0.621	0.2	0	3	Prickle2
Frmd4b	0	1.28772	0.627	0.214	0	3	Frmd4b
Arhgap42	0	2.64988	0.649	0.25	0	3	Arhgap42
Nhsl1	0	2.93534	0.585	0.186	0	3	Nhsl1
Fbn11	0	1.53533	0.6	0.205	0	3	Fbn1
Pde1a1	0	1.78957	0.526	0.133	0	3	Pde1a
Sh3rf1	0	1.60289	0.601	0.214	0	3	Sh3rf1
Myh9	0	1.62064	0.618	0.235	0	3	Myh9
Stard8	0	2.27463	0.564	0.182	0	3	Stard8
Sema6d	0	2.3578	0.563	0.185	0	3	Sema6d
Ednra	0	2.84302	0.576	0.2	0	3	Ednra
Art31	0	2.41322	0.673	0.302	0	3	Art3
Sparc	0	2.06965	0.503	0.144	0	3	Sparc
Kcnt21	0	0.740798	0.532	0.178	0	3	Kcnt2
Lama21	0	1.23636	0.912	0.568	0	3	Lama2
Tmod3	0	1.69945	0.544	0.2	0	3	Tmod3
Ror11	0	1.72206	0.719	0.378	0	3	Ror1
Cdk6	0	2.07047	0.533	0.193	0	3	Cdk6
Cobll11	0	1.86985	0.699	0.38	0	3	Cobll1
Pde3a1	0	1.44092	0.791	0.475	0	3	Pde3a
Ets11	0	0.765865	0.548	0.236	0	3	Ets1
Frmd4a	0	2.07775	0.623	0.314	0	3	Frmd4a
Rapgef51	0	0.957755	0.564	0.256	0	3	Rapgef5
Akt32	0	0.849195	0.635	0.329	0	3	Akt3
Lims1	0	2.06185	0.816	0.511	0	3	Lims1
Arap2	0	2.31472	0.536	0.235	0	3	Arap2
Sept7	0	2.05492	0.589	0.288	0	3	2024-09-07
Pakap1	0	2.40832	0.557	0.257	0	3	Pakap
Syne21	0	1.19512	0.551	0.252	0	3	Syne2
St51	0	1.6413	0.635	0.338	0	3	St5
Rapgef21	0	1.85703	0.879	0.586	0	3	Rapgef2
Ano6	0	1.37308	0.561	0.268	0	3	Ano6
9530026P05Rik	0	1.60899	0.727	0.442	0	3	9530026P05Rik
Dlc1	0	2.78488	0.995	0.714	0	3	Dlc1
Pdzd2	0	1.54345	0.834	0.554	0	3	Pdzd2
Kalrn	0	1.647	0.567	0.293	0	3	Kalrn
Grk5	0	1.37197	0.659	0.389	0	3	Grk5
Igfbp71	0	0.707571	0.501	0.241	0	3	Igfbp7
Psd3	0	0.95764	0.833	0.574	0	3	Psd3
Rora1	0	1.16491	0.96	0.707	0	3	Rora
Snrk1	0	1.01449	0.629	0.379	0	3	Snrk
Cdk141	0	0.980455	0.529	0.28	0	3	Cdk14
Raph1	0	1.59726	0.734	0.49	0	3	Raph1
Ubr1	0	1.71896	0.54	0.3	0	3	Ubr1
Oxr11	0	0.831102	0.61	0.371	0	3	Oxr1
Pik3ca	0	1.78424	0.536	0.301	0	3	Pik3ca
Zfhx3	0	1.04254	0.562	0.33	0	3	Zfhx3
Hecw2	0	1.35369	0.569	0.337	0	3	Hecw2
Cyth31	0	1.1568	0.501	0.274	0	3	Cyth3
Zfpm22	0	0.655529	0.818	0.603	0	3	Zfpm2
Rasal21	0	1.00016	0.771	0.563	0	3	Rasal2
Pard31	0	1.3579	0.712	0.508	0	3	Pard3
Creb5	0	1.1298	0.505	0.304	0	3	Creb5
Pakap.11	0	1.10185	0.67	0.47	0	3	Pakap.1
Wdfy3	0	1.21339	0.594	0.394	0	3	Wdfy3
Daam1	0	1.54317	0.656	0.465	0	3	Daam1
Nlk	0	1.33526	0.545	0.357	0	3	Nlk
Mprip	0	1.22416	0.598	0.41	0	3	Mprip
Arhgap101	0	1.46094	0.63	0.447	0	3	Arhgap10
Airn1	0	1.05801	0.785	0.612	0	3	Airn
Rbms11	0	0.990209	0.849	0.696	0	3	Rbms1
Rbpms	0	0.846188	0.809	0.665	0	3	Rbpms
Lpp	0	0.923869	0.76	0.635	0	3	Lpp
Cped12	0	0.755205	0.779	0.655	0	3	Cped1
Nbea	0	1.05807	0.676	0.553	0	3	Nbea
Utrn1	0	0.761378	0.773	0.656	0	3	Utrn
Nbeal11	0	0.896006	0.684	0.582	0	3	Nbeal1
Ssh21	0	0.77797	0.74	0.652	0	3	Ssh2
Maml3	9.48488e-242	1.08564	0.585	0.47	3.17004e-237	3	Maml3
Phlpp11	1.74833e-236	0.844868	0.601	0.472	5.84327e-232	3	Phlpp1
Igf2r1	2.28405e-225	1.18843	0.509	0.355	7.63375e-221	3	Igf2r
Ssbp21	3.4914e-213	1.11972	0.5	0.374	1.1669e-208	3	Ssbp2
Map3k201	4.81157e-211	1.15522	0.505	0.391	1.60812e-206	3	Map3k20
Fermt2	4.12207e-205	1.06527	0.535	0.426	1.37768e-200	3	Fermt2
Zfand3	3.57833e-193	0.739812	0.658	0.597	1.19595e-188	3	Zfand3
Itpr11	3.02224e-182	0.639985	0.677	0.6	1.01009e-177	3	Itpr1
Slco3a1	3.79771e-182	1.07444	0.506	0.403	1.26927e-177	3	Slco3a1
Herc1	1.48668e-161	0.905163	0.567	0.509	4.96879e-157	3	Herc1
Inpp4b1	2.50327e-160	0.665148	0.549	0.433	8.36644e-156	3	Inpp4b
Rock1	3.59051e-155	0.831306	0.581	0.514	1.20002e-150	3	Rock1
Eif4g31	6.20366e-155	0.900509	0.531	0.425	2.07339e-150	3	Eif4g3
Nf1	3.77422e-151	0.846003	0.551	0.471	1.26142e-146	3	Nf1
Mef2c1	6.36367e-147	0.618819	0.628	0.54	2.12687e-142	3	Mef2c
Gab11	3.45176e-137	0.910023	0.554	0.479	1.15365e-132	3	Gab1
Tmcc1	2.00306e-131	0.602113	0.614	0.558	6.69464e-127	3	Tmcc1
Nedd4l	2.63235e-117	0.887879	0.515	0.455	8.79785e-113	3	Nedd4l
Igf1r1	1.12642e-92	0.581008	0.591	0.539	3.76472e-88	3	Igf1r

## Sheet: 4(MΦ)
MΦ	p_val	avg_log2FC	pct.1	pct.2	p_val_adj	cluster	gene
Slc9a9	0	6.55258	0.915	0.045	0	4	Slc9a9
Mrc1	0	8.08594	0.85	0.006	0	4	Mrc1
Mctp1	0	7.09848	0.85	0.019	0	4	Mctp1
Arhgap15	0	4.99272	0.837	0.031	0	4	Arhgap15
F13a1	0	8.78787	0.805	0.004	0	4	F13a1
Dock2	0	5.50744	0.809	0.012	0	4	Dock2
Runx1	0	6.58024	0.806	0.013	0	4	Runx1
Ptprj	0	4.51923	0.868	0.098	0	4	Ptprj
Rbpj	0	6.52562	0.932	0.167	0	4	Rbpj
Pid12	0	3.86226	0.951	0.2	0	4	Pid1
Ptprc	0	5.65264	0.751	0.011	0	4	Ptprc
Prkcb	0	6.01193	0.739	0.009	0	4	Prkcb
Dab2	0	4.59466	0.844	0.122	0	4	Dab2
Inpp5d	0	4.39145	0.75	0.064	0	4	Inpp5d
Fyb	0	7.17521	0.693	0.007	0	4	Fyb
Dock8	0	5.58622	0.734	0.051	0	4	Dock8
Maf	0	6.59442	0.684	0.012	0	4	Maf
Frmd4b1	0	3.40412	0.853	0.205	0	4	Frmd4b
Pip4k2a	0	3.67991	0.803	0.16	0	4	Pip4k2a
Aoah	0	7.97485	0.64	0.003	0	4	Aoah
Ctsc	0	6.47541	0.647	0.017	0	4	Ctsc
Adgre1	0	8.4418	0.631	0.003	0	4	Adgre1
Myo5a	0	4.62917	0.736	0.109	0	4	Myo5a
Stab1	0	5.02205	0.67	0.044	0	4	Stab1
Bank1	0	5.20585	0.623	0.007	0	4	Bank1
Tbxas1	0	6.85292	0.621	0.017	0	4	Tbxas1
Lyn1	0	2.9698	0.793	0.195	0	4	Lyn
Rbm47	0	8.06059	0.599	0.003	0	4	Rbm47
Nrros	0	4.88286	0.634	0.038	0	4	Nrros
Lcp1	0	6.15511	0.612	0.017	0	4	Lcp1
Cfh1	0	2.72865	0.739	0.145	0	4	Cfh
Apoe	0	4.62307	0.651	0.057	0	4	Apoe
Myo1f	0	7.28877	0.591	0.005	0	4	Myo1f
Tanc2	0	3.49297	0.81	0.229	0	4	Tanc2
Gm26740	0	6.10278	0.584	0.007	0	4	Gm26740
Csf1r	0	7.37524	0.582	0.005	0	4	Csf1r
Skap2	0	3.40574	0.678	0.104	0	4	Skap2
Epsti1	0	6.6304	0.565	0.005	0	4	Epsti1
C1qb	0	8.04461	0.562	0.003	0	4	C1qb
Zeb22	0	3.14766	0.914	0.372	0	4	Zeb2
Tm6sf1	0	4.93113	0.571	0.03	0	4	Tm6sf1
Iqgap2	0	5.30619	0.55	0.014	0	4	Iqgap2
Unc93b1	0	4.74401	0.565	0.035	0	4	Unc93b1
Abca9	0	3.2953	0.611	0.093	0	4	Abca9
Dclre1c	0	5.0526	0.568	0.053	0	4	Dclre1c
Cyth4	0	7.46237	0.517	0.003	0	4	Cyth4
Dock10	0	2.87357	0.635	0.123	0	4	Dock10
March1	0	5.84125	0.519	0.007	0	4	2024-03-01
Arhgap22	0	5.9362	0.529	0.019	0	4	Arhgap22
Serinc3	0	2.78676	0.706	0.198	0	4	Serinc3
Lyz2	0	7.35164	0.513	0.005	0	4	Lyz2
Pik3ap1	0	7.3601	0.511	0.004	0	4	Pik3ap1
Lilrb4a	0	7.87497	0.507	0.002	0	4	Lilrb4a
C1qa	0	7.35953	0.505	0.004	0	4	C1qa
Taok3	0	3.29271	0.639	0.143	0	4	Taok3
Elmo11	0	1.74302	0.83	0.336	0	4	Elmo1
Trps12	0	1.86406	0.76	0.274	0	4	Trps1
Gas7	0	3.96767	0.536	0.053	0	4	Gas7
Adap21	0	2.53748	0.603	0.121	0	4	Adap2
Vav32	0	1.86321	0.744	0.269	0	4	Vav3
Zswim6	0	2.99189	0.712	0.237	0	4	Zswim6
Fam49b	0	3.24383	0.73	0.255	0	4	Fam49b
Camk1d1	0	1.43517	0.936	0.464	0	4	Camk1d
Fli11	0	0.932544	0.763	0.294	0	4	Fli1
Zfhx31	0	2.66551	0.778	0.318	0	4	Zfhx3
Wwp1	0	3.6932	0.722	0.267	0	4	Wwp1
Cmip	0	2.08533	0.678	0.226	0	4	Cmip
Ap2a2	0	3.54953	0.562	0.116	0	4	Ap2a2
Ankrd44	0	2.07897	0.706	0.265	0	4	Ankrd44
Ophn1	0	3.23437	0.66	0.221	0	4	Ophn1
Slco2b1	0	3.3962	0.51	0.072	0	4	Slco2b1
App1	0	1.85791	0.733	0.319	0	4	App
Mertk	0	3.03726	0.509	0.096	0	4	Mertk
Acer3	0	3.2531	0.556	0.15	0	4	Acer3
Plcl2	0	2.98433	0.603	0.207	0	4	Plcl2
Itsn1	0	3.22559	0.712	0.318	0	4	Itsn1
Atp2b1	0	2.59816	0.765	0.377	0	4	Atp2b1
Trerf1	0	2.77181	0.503	0.115	0	4	Trerf1
Rab8b	0	2.70366	0.517	0.135	0	4	Rab8b
Nav12	0	1.42881	0.691	0.309	0	4	Nav1
Cdk142	0	2.04339	0.644	0.276	0	4	Cdk14
Tgfbr2	0	2.67917	0.523	0.162	0	4	Tgfbr2
Snx24	0	2.811	0.566	0.205	0	4	Snx24
Eps151	0	2.10695	0.579	0.219	0	4	Eps15
Wipf11	0	1.62413	0.611	0.252	0	4	Wipf1
Fnbp1	0	2.53589	0.776	0.421	0	4	Fnbp1
Snx2	0	3.12709	0.521	0.166	0	4	Snx2
Rap1gds1	0	2.25506	0.628	0.276	0	4	Rap1gds1
Tmcc31	0	2.24162	0.688	0.346	0	4	Tmcc3
Rtn4	0	2.2266	0.534	0.193	0	4	Rtn4
Snx29	0	2.53936	0.663	0.322	0	4	Snx29
Agmo1	0	1.82057	0.52	0.182	0	4	Agmo
Zdhhc14	0	2.78084	0.649	0.317	0	4	Zdhhc14
AC149090.1	0	2.26797	0.564	0.244	0	4	AC149090.1
Rreb1	0	2.4145	0.793	0.475	0	4	Rreb1
Sh3kbp1	0	2.36299	0.546	0.236	0	4	Sh3kbp1
Dleu2	0	2.0001	0.73	0.422	0	4	Dleu2
Srgap21	0	1.73574	0.724	0.417	0	4	Srgap2
Arhgap181	0	1.18599	0.545	0.24	0	4	Arhgap18
Lifr	0	2.62169	0.553	0.251	0	4	Lifr
Pitpna	0	2.15904	0.542	0.243	0	4	Pitpna
AY0361181	0	0.794669	0.77	0.471	0	4	AY036118
Cltc	0	2.3431	0.598	0.301	0	4	Cltc
Mtss1	0	2.18591	0.636	0.341	0	4	Mtss1
Wdfy31	0	1.8465	0.684	0.391	0	4	Wdfy3
Rnf169	0	2.0684	0.596	0.304	0	4	Rnf169
Psd31	0	2.30138	0.864	0.575	0	4	Psd3
Gnaq1	0	1.9196	0.816	0.528	0	4	Gnaq
Hdac91	0	1.29501	0.789	0.502	0	4	Hdac9
Wdfy2	0	2.37361	0.5	0.224	0	4	Wdfy2
Dgkd	0	2.08149	0.516	0.241	0	4	Dgkd
Mapk14	0	2.3494	0.55	0.282	0	4	Mapk14
Wasf21	0	1.30424	0.601	0.334	0	4	Wasf2
Tet3	0	2.11813	0.518	0.252	0	4	Tet3
Ppm1h	0	1.79348	0.54	0.288	0	4	Ppm1h
Tmcc11	0	2.16969	0.797	0.547	0	4	Tmcc1
Lrmda1	0	1.29597	0.617	0.373	0	4	Lrmda
Enox2	0	2.00208	0.577	0.336	0	4	Enox2
Slc12a6	0	1.83938	0.528	0.292	0	4	Slc12a6
Rnf150	0	2.09866	0.625	0.391	0	4	Rnf150
Mbnl1	0	1.995	0.884	0.659	0	4	Mbnl1
Dennd1a	0	1.93518	0.822	0.6	0	4	Dennd1a
Actr3	0	1.85248	0.504	0.288	0	4	Actr3
Etv61	0	1.35195	0.678	0.464	0	4	Etv6
Man1a1	0	1.82394	0.549	0.335	0	4	Man1a
Gab21	0	1.0435	0.757	0.549	0	4	Gab2
Rb1	0	1.57161	0.509	0.305	0	4	Rb1
Mef2c2	0	1.49658	0.735	0.534	0	4	Mef2c
Iqgap1	0	1.85381	0.536	0.338	0	4	Iqgap1
Mitf1	0	1.35233	0.611	0.417	0	4	Mitf
Zfp710	0	1.72476	0.589	0.396	0	4	Zfp710
Parp8	0	1.73879	0.533	0.344	0	4	Parp8
Pias1	0	1.71165	0.54	0.355	0	4	Pias1
Foxp1	0	1.43677	0.844	0.664	0	4	Foxp1
Ppp3ca1	0	1.37056	0.799	0.621	0	4	Ppp3ca
Atxn7l1	0	1.67511	0.509	0.342	0	4	Atxn7l1
Picalm1	0	1.19604	0.685	0.52	0	4	Picalm
Mef2a	0	1.38667	0.759	0.618	0	4	Mef2a
Tbc1d5	0	1.31116	0.699	0.57	0	4	Tbc1d5
Foxn3	0	1.16711	0.75	0.646	0	4	Foxn3
Tmem164	2.59524e-304	1.46044	0.515	0.326	8.6738e-300	4	Tmem164
Uvrag	1.11873e-298	1.39522	0.564	0.407	3.73901e-294	4	Uvrag
Fam172a1	1.49788e-264	1.14068	0.627	0.492	5.00621e-260	4	Fam172a
Btbd9	2.07351e-262	1.21683	0.596	0.477	6.9301e-258	4	Btbd9
Vps13b	9.69018e-250	1.21691	0.608	0.523	3.23865e-245	4	Vps13b
Tacc11	1.66242e-232	1.17097	0.5	0.302	5.55614e-228	4	Tacc1
Fchsd2	6.20878e-210	1.45508	0.508	0.376	2.0751e-205	4	Fchsd2
Wnk1	2.54099e-195	0.91175	0.67	0.604	8.4925e-191	4	Wnk1
Ext11	2.69536e-195	0.719783	0.76	0.69	9.00843e-191	4	Ext1
Diaph21	2.22709e-189	0.764483	0.713	0.668	7.44339e-185	4	Diaph2
Exoc6b1	5.92506e-186	1.01954	0.6	0.506	1.98027e-181	4	Exoc6b
Anks1	3.61942e-173	1.31313	0.504	0.407	1.20968e-168	4	Anks1
Abi1	3.25901e-168	1.12137	0.507	0.366	1.08923e-163	4	Abi1
Fcho21	1.07259e-162	0.972296	0.564	0.449	3.58482e-158	4	Fcho2
Pan31	1.32956e-134	0.876561	0.584	0.522	4.44366e-130	4	Pan3
Sbf21	1.96215e-129	0.776388	0.644	0.628	6.5579e-125	4	Sbf2
Exoc4	7.01315e-128	0.74865	0.668	0.648	2.34394e-123	4	Exoc4
Jmjd1c	1.58469e-121	0.853292	0.598	0.559	5.29634e-117	4	Jmjd1c
Ankrd11	1.93802e-117	0.817769	0.604	0.588	6.47725e-113	4	Ankrd11
Mycbp2	1.42213e-116	0.864867	0.589	0.568	4.75305e-112	4	Mycbp2
Rsrp11	2.89881e-114	0.815452	0.565	0.501	9.6884e-110	4	Rsrp1
Osbpl91	9.80718e-114	1.38312	0.506	0.456	3.27775e-109	4	Osbpl9
Eif4g32	2.1062e-110	0.923463	0.516	0.428	7.03934e-106	4	Eif4g3
Chd91	1.39078e-109	0.800289	0.602	0.578	4.64827e-105	4	Chd9
Ssh22	1.35234e-98	0.718403	0.66	0.658	4.51979e-94	4	Ssh2
Immp2l1	5.42286e-73	0.88253	0.515	0.436	1.81243e-68	4	Immp2l
Kansl1	3.49179e-54	0.581244	0.611	0.621	1.16703e-49	4	Kansl1
Phf21a1	1.94976e-51	0.68749	0.54	0.525	6.5165e-47	4	Phf21a
Lrch11	4.57351e-46	0.690852	0.501	0.48	1.52856e-41	4	Lrch1
Ncoa2	1.15152e-35	0.673727	0.514	0.528	3.84862e-31	4	Ncoa2

## Sheet: 5(EC-art)
EC-art	p_val	avg_log2FC	pct.1	pct.2	p_val_adj	cluster	gene
St6galnac31	0	3.17459	0.867	0.172	0	5	St6galnac3
Ptprb1	0	2.34311	0.893	0.202	0	5	Ptprb
Ldb21	0	3.38122	0.874	0.184	0	5	Ldb2
Vegfc	0	4.28257	0.782	0.1	0	5	Vegfc
Flt11	0	1.99204	0.872	0.213	0	5	Flt1
Plcb11	0	2.3029	0.862	0.226	0	5	Plcb1
Mecom2	0	3.01232	0.969	0.343	0	5	Mecom
Rasgrf21	0	3.06867	0.735	0.128	0	5	Rasgrf2
Cyyr11	0	1.9133	0.789	0.209	0	5	Cyyr1
Pdgfd1	0	3.04295	0.906	0.338	0	5	Pdgfd
Pcsk5	0	5.17322	0.618	0.058	0	5	Pcsk5
Arhgap311	0	1.88564	0.852	0.3	0	5	Arhgap31
Lama3	0	5.69501	0.55	0.023	0	5	Lama3
Pecam11	0	2.19373	0.702	0.179	0	5	Pecam1
Samd121	0	2.72508	0.649	0.135	0	5	Samd12
Prex22	0	1.92829	0.859	0.367	0	5	Prex2
Dock91	0	1.80316	0.738	0.247	0	5	Dock9
Apba1	0	3.08676	0.621	0.133	0	5	Apba1
Ebf13	0	1.45917	0.938	0.455	0	5	Ebf1
Myo101	0	2.37301	0.718	0.239	0	5	Myo10
Eng1	0	2.15533	0.673	0.199	0	5	Eng
Epas1	0	2.60816	0.747	0.275	0	5	Epas1
Egfl71	0	1.66967	0.645	0.175	0	5	Egfl7
Efnb2	0	3.32656	0.54	0.072	0	5	Efnb2
Adgrf51	0	1.54741	0.678	0.213	0	5	Adgrf5
Fgd51	0	2.2432	0.612	0.147	0	5	Fgd5
Adgrl41	0	1.19524	0.665	0.205	0	5	Adgrl4
Itpkb1	0	1.45739	0.747	0.287	0	5	Itpkb
Rgs3	0	2.86413	0.566	0.106	0	5	Rgs3
Unc13b	0	2.63789	0.594	0.137	0	5	Unc13b
Dnm31	0	1.9956	0.637	0.195	0	5	Dnm3
Timp3	0	2.39811	0.664	0.223	0	5	Timp3
Arl151	0	3.67073	0.958	0.53	0	5	Arl15
Podxl	0	2.48561	0.53	0.108	0	5	Podxl
Cav11	0	1.83545	0.578	0.156	0	5	Cav1
Myo1e	0	2.16163	0.632	0.211	0	5	Myo1e
Mcc1	0	1.69946	0.671	0.251	0	5	Mcc
Sncaip	0	2.39796	0.527	0.108	0	5	Sncaip
Cdk19	0	3.30902	0.625	0.216	0	5	Cdk19
Arhgef28	0	2.87011	0.51	0.11	0	5	Arhgef28
Lims21	0	1.61125	0.584	0.185	0	5	Lims2
Fryl	0	2.44869	0.793	0.413	0	5	Fryl
Map4k31	0	2.19827	0.759	0.392	0	5	Map4k3
Heg12	0	2.14752	0.884	0.547	0	5	Heg1
Ptprg1	0	1.5567	0.958	0.7	0	5	Ptprg
Ptprm1	0	1.76648	0.972	0.725	0	5	Ptprm
Klf121	0	1.92022	0.809	0.567	0	5	Klf12
Utrn2	0	1.95488	0.895	0.66	0	5	Utrn
Rapgef11	2.21283e-293	1.78858	0.746	0.401	7.39573e-289	5	Rapgef1
Apbb21	7.80096e-275	1.34852	0.845	0.603	2.60724e-270	5	Apbb2
Dach11	4.25806e-272	1.61483	0.686	0.263	1.42313e-267	5	Dach1
Nxpe41	1.20009e-271	1.67283	0.508	0.171	4.01095e-267	5	Nxpe4
Kitl1	1.0426e-270	1.60602	0.643	0.231	3.48458e-266	5	Kitl
Lrrc8c1	1.15051e-262	1.65179	0.56	0.201	3.84524e-258	5	Lrrc8c
Magi11	5.65219e-255	1.27463	0.836	0.559	1.88908e-250	5	Magi1
Elmo12	3.26779e-250	1.28779	0.751	0.36	1.09216e-245	5	Elmo1
Shank31	6.39086e-250	1.29882	0.556	0.186	2.13595e-245	5	Shank3
Elk31	7.37402e-239	1.47181	0.566	0.21	2.46454e-234	5	Elk3
Mgll1	5.67239e-238	1.75796	0.594	0.217	1.89583e-233	5	Mgll
Actn4	9.97407e-238	2.30184	0.593	0.271	3.33353e-233	5	Actn4
Tek1	9.70593e-228	1.57315	0.529	0.2	3.24392e-223	5	Tek
Tspan71	1.104e-225	1.65936	0.526	0.177	3.68978e-221	5	Tspan7
Slc6a6	1.44692e-224	2.29146	0.594	0.267	4.83589e-220	5	Slc6a6
Cdk171	7.37696e-224	1.83425	0.62	0.282	2.46553e-219	5	Cdk17
Tanc11	1.30187e-219	1.62883	0.691	0.378	4.35112e-215	5	Tanc1
Nxn	1.19462e-215	1.60638	0.541	0.204	3.99267e-211	5	Nxn
Plekhg11	3.33428e-215	1.65127	0.606	0.263	1.11438e-210	5	Plekhg1
Gulp11	7.81323e-215	1.52312	0.559	0.231	2.61134e-210	5	Gulp1
Fbxl72	9.4711e-209	1.3182	0.698	0.34	3.16543e-204	5	Fbxl7
Prkch1	1.96997e-208	1.07898	0.591	0.227	6.58402e-204	5	Prkch
Plcb41	2.95534e-204	0.995188	0.802	0.483	9.87732e-200	5	Plcb4
Adarb1	4.12532e-200	2.09838	0.509	0.216	1.37876e-195	5	Adarb1
Etl41	2.72434e-187	1.13824	0.752	0.452	9.10529e-183	5	Etl4
Rapgef4	4.11652e-185	1.95743	0.576	0.309	1.37582e-180	5	Rapgef4
Rapgef22	2.15602e-184	1.19656	0.789	0.604	7.20586e-180	5	Rapgef2
Myo1d1	1.78513e-183	1.39696	0.569	0.233	5.96627e-179	5	Myo1d
Cdc42bpa	3.09685e-183	1.78114	0.632	0.379	1.03503e-178	5	Cdc42bpa
Galnt181	1.29455e-179	1.38692	0.582	0.264	4.32664e-175	5	Galnt18
Clic41	6.66799e-176	2.1247	0.635	0.397	2.22858e-171	5	Clic4
Tmod31	1.51499e-169	1.6852	0.532	0.22	5.06339e-165	5	Tmod3
Sema6a1	8.35733e-169	0.910858	0.572	0.247	2.79319e-164	5	Sema6a
Fli12	9.78512e-168	0.752115	0.683	0.316	3.27038e-163	5	Fli1
Lima11	7.31878e-167	1.94027	0.556	0.29	2.44608e-162	5	Lima1
Ablim12	1.59133e-162	1.04011	0.866	0.655	5.31854e-158	5	Ablim1
Cmip1	1.8806e-159	1.35306	0.537	0.248	6.28533e-155	5	Cmip
Mast42	5.18549e-158	0.77131	0.829	0.534	1.7331e-153	5	Mast4
Fbn12	3.08174e-157	1.195	0.506	0.229	1.02998e-152	5	Fbn1
Ptk21	7.09296e-154	1.29088	0.703	0.461	2.37061e-149	5	Ptk2
Hip1	1.6736e-153	1.51192	0.591	0.324	5.59351e-149	5	Hip1
Plxna21	9.76367e-148	1.51438	0.631	0.401	3.26322e-143	5	Plxna2
Akt33	6.75955e-147	1.08269	0.647	0.346	2.25918e-142	5	Akt3
Nebl1	5.45438e-142	2.15163	0.541	0.367	1.82296e-137	5	Nebl
Rapgef52	1.7525e-139	1.18474	0.572	0.274	5.85721e-135	5	Rapgef5
Gnaq2	4.83095e-139	1.18114	0.721	0.543	1.6146e-134	5	Gnaq
Ralgapa11	6.44465e-138	1.19898	0.733	0.613	2.15393e-133	5	Ralgapa1
4931406P16Rik1	1.17505e-137	1.48604	0.561	0.302	3.92727e-133	5	4931406P16Rik
Itga12	3.32347e-137	1.2468	0.586	0.266	1.11077e-132	5	Itga1
Dock11	1.73128e-136	1.15886	0.7	0.481	5.78629e-132	5	Dock1
Nedd91	4.84666e-129	1.57935	0.534	0.273	1.61985e-124	5	Nedd9
Tmcc32	3.53032e-123	1.18361	0.624	0.362	1.1799e-118	5	Tmcc3
Tcf41	4.35046e-123	0.65586	0.876	0.612	1.45401e-118	5	Tcf4
AY0361182	3.39313e-121	0.862381	0.759	0.484	1.13405e-116	5	AY036118
Ttc282	2.29126e-120	1.15027	0.689	0.461	7.65786e-116	5	Ttc28
Stox21	3.32724e-120	0.999799	0.688	0.484	1.11203e-115	5	Stox2
Ets12	1.204e-115	1.1875	0.504	0.254	4.02401e-111	5	Ets1
Maml23	1.655e-110	0.821021	0.749	0.45	5.53135e-106	5	Maml2
App2	5.75758e-110	0.93509	0.619	0.339	1.9243e-105	5	App
Plxna4	1.57895e-109	1.57498	0.562	0.387	5.27716e-105	5	Plxna4
Ccny1	3.80678e-108	1.37179	0.601	0.415	1.2723e-103	5	Ccny
Klf71	1.71128e-106	1.22479	0.616	0.385	5.71945e-102	5	Klf7
Pitpnc11	2.30051e-103	0.993091	0.71	0.552	7.68876e-99	5	Pitpnc1
Foxp11	5.01226e-101	0.934759	0.753	0.673	1.6752e-96	5	Foxp1
Kalrn1	5.98e-101	1.41381	0.52	0.309	1.99863e-96	5	Kalrn
Afdn1	4.20769e-97	1.18475	0.584	0.38	1.40629e-92	5	Afdn
Syne11	3.01255e-96	1.07798	0.67	0.513	1.00686e-91	5	Syne1
Myh91	8.26397e-93	1.32502	0.501	0.259	2.76198e-88	5	Myh9
Syne22	1.83748e-92	1.15842	0.519	0.269	6.14122e-88	5	Syne2
Oxr12	4.03987e-90	1.11966	0.598	0.385	1.3502e-85	5	Oxr1
Numb1	7.25434e-86	1.41708	0.559	0.378	2.42455e-81	5	Numb
Gm424181	1.11879e-83	0.743546	0.905	0.695	3.73922e-79	5	Gm42418
Luzp1	1.9464e-82	1.33467	0.525	0.339	6.50526e-78	5	Luzp1
Sgms11	4.49706e-82	1.1289	0.642	0.543	1.50301e-77	5	Sgms1
Picalm2	3.6935e-81	1.11889	0.657	0.528	1.23444e-76	5	Picalm
Bmpr2	4.39237e-72	1.41644	0.503	0.337	1.46802e-67	5	Bmpr2
Stard13	9.71476e-60	1.34539	0.512	0.394	3.24687e-55	5	Stard13
Rbfox2	1.98415e-57	0.918938	0.654	0.594	6.63142e-53	5	Rbfox2
Diaph22	1.44826e-51	0.88659	0.691	0.67	4.84038e-47	5	Diaph2
9530026P05Rik1	8.82093e-45	1.06105	0.555	0.461	2.94813e-40	5	9530026P05Rik
Rftn11	2.82906e-44	0.769765	0.561	0.442	9.45528e-40	5	Rftn1
Cped13	1.65762e-41	0.655257	0.697	0.664	5.5401e-37	5	Cped1
Wasf22	9.23482e-37	0.784983	0.502	0.348	3.08646e-32	5	Wasf2
Srgap22	4.04623e-36	0.724646	0.559	0.434	1.35233e-31	5	Srgap2
Stag12	4.49088e-33	0.732109	0.607	0.529	1.50094e-28	5	Stag1
Snrk2	1.06552e-31	0.8142	0.512	0.395	3.56117e-27	5	Snrk
Camk1d2	1.0614e-29	0.61283	0.639	0.49	3.54741e-25	5	Camk1d
Lrch12	7.72206e-28	0.84824	0.529	0.48	2.58087e-23	5	Lrch1
Foxn31	1.1925e-26	0.584981	0.67	0.652	3.98558e-22	5	Foxn3
Mef2c3	2.89e-23	0.598264	0.594	0.546	9.65896e-19	5	Mef2c
Peak11	7.71006e-22	0.656905	0.599	0.576	2.57686e-17	5	Peak1
Ldlrad41	1.0748e-20	0.791607	0.55	0.508	3.5922e-16	5	Ldlrad4
Nbea1	4.4277e-20	0.653549	0.569	0.562	1.47983e-15	5	Nbea

## Sheet: 6(EC-end)
EC-end	p_val	avg_log2FC	pct.1	pct.2	p_val_adj	cluster	gene
Tmem108	0	7.89429	0.923	0.05	0	6	Tmem108
Chrm3	0	6.25755	0.894	0.034	0	6	Chrm3
Npr3	0	9.10084	0.819	0.011	0	6	Npr3
Cgnl1	0	5.05731	0.923	0.122	0	6	Cgnl1
Cdh11	0	7.08227	0.809	0.032	0	6	Cdh11
Cfh2	0	3.76623	0.929	0.17	0	6	Cfh
Vwf	0	5.68885	0.762	0.02	0	6	Vwf
Unc13b1	0	3.70079	0.86	0.135	0	6	Unc13b
Sncaip1	0	4.06501	0.808	0.105	0	6	Sncaip
Pecam12	0	2.66457	0.863	0.179	0	6	Pecam1
Kcnt22	0	2.77701	0.859	0.194	0	6	Kcnt2
Emcn1	0	2.67928	0.817	0.16	0	6	Emcn
Csgalnact1	0	3.03203	0.827	0.174	0	6	Csgalnact1
Acer2	0	4.4154	0.7	0.069	0	6	Acer2
Eng2	0	2.56148	0.826	0.198	0	6	Eng
Gmds	0	3.39218	0.905	0.279	0	6	Gmds
Rasgef1b	0	5.19349	0.748	0.125	0	6	Rasgef1b
Smoc1	0	8.72432	0.622	0.003	0	6	Smoc1
Wdr17	0	6.06882	0.636	0.024	0	6	Wdr17
Cemip2	0	4.99257	0.669	0.064	0	6	Cemip2
Rgs31	0	3.33136	0.708	0.106	0	6	Rgs3
Nrg1	0	9.71223	0.6	0.009	0	6	Nrg1
Tmtc21	0	2.54881	0.764	0.185	0	6	Tmtc2
Col4a4	0	3.54933	0.67	0.092	0	6	Col4a4
Mecom3	0	1.82749	0.918	0.346	0	6	Mecom
Nxn1	0	2.47079	0.765	0.202	0	6	Nxn
Mgp	0	2.7017	0.654	0.101	0	6	Mgp
Bace2	0	5.71886	0.574	0.021	0	6	Bace2
Spon1	0	2.94483	0.661	0.111	0	6	Spon1
Gpm6a	0	6.57734	0.55	0.006	0	6	Gpm6a
Eps81	0	2.54488	0.713	0.171	0	6	Eps8
Pkhd1l1	0	6.43044	0.544	0.007	0	6	Pkhd1l1
Samd122	0	1.968	0.665	0.136	0	6	Samd12
Flrt2	0	4.74664	0.584	0.055	0	6	Flrt2
Ptpn14	0	3.39973	0.781	0.253	0	6	Ptpn14
Sox52	0	1.89106	0.756	0.228	0	6	Sox5
Dock92	0	1.55093	0.775	0.248	0	6	Dock9
Elmo13	0	1.6142	0.884	0.359	0	6	Elmo1
Stxbp6	0	2.28199	0.708	0.187	0	6	Stxbp6
Hmcn11	0	3.88278	0.968	0.448	0	6	Hmcn1
Bmx	0	6.53261	0.528	0.008	0	6	Bmx
Car8	0	2.36317	0.636	0.124	0	6	Car8
Rps6ka2	0	4.46194	0.715	0.218	0	6	Rps6ka2
Entpd1	0	2.64594	0.591	0.096	0	6	Entpd1
St6galnac32	0	1.3631	0.664	0.177	0	6	St6galnac3
Greb1l	0	3.41654	0.552	0.068	0	6	Greb1l
Bmp61	0	2.68721	0.674	0.191	0	6	Bmp6
Itgbl11	0	2.73082	0.572	0.089	0	6	Itgbl1
Thsd4	0	3.26787	0.685	0.204	0	6	Thsd4
Dennd5b1	0	2.46113	0.797	0.317	0	6	Dennd5b
Ece1	0	2.4749	0.617	0.14	0	6	Ece1
Dock61	0	1.91731	0.642	0.166	0	6	Dock6
Erg1	0	2.06212	0.608	0.132	0	6	Erg
Cdc14a	0	3.41453	0.563	0.088	0	6	Cdc14a
Cpe	0	3.33466	0.657	0.195	0	6	Cpe
Epha7	0	5.82237	0.538	0.077	0	6	Epha7
Tmcc33	0	2.2061	0.82	0.36	0	6	Tmcc3
Col5a21	0	2.30798	0.598	0.141	0	6	Col5a2
Il6st	0	2.8799	0.658	0.203	0	6	Il6st
Tmem1641	0	2.96542	0.782	0.332	0	6	Tmem164
Tm4sf1	0	2.70736	0.532	0.088	0	6	Tm4sf1
Col4a3	0	3.69866	0.5	0.063	0	6	Col4a3
Palm	0	2.79019	0.524	0.091	0	6	Palm
Pgm51	0	3.21617	0.694	0.261	0	6	Pgm5
Plxna41	0	2.52768	0.813	0.384	0	6	Plxna4
Kank1	0	3.24131	0.601	0.186	0	6	Kank1
Atp1b3	0	3.15936	0.52	0.106	0	6	Atp1b3
Prkg11	0	1.75564	0.961	0.548	0	6	Prkg1
Fgd52	0	1.43915	0.56	0.149	0	6	Fgd5
Parp81	0	2.16098	0.751	0.35	0	6	Parp8
Heg13	0	2.4277	0.946	0.547	0	6	Heg1
Meis21	0	2.40204	0.825	0.447	0	6	Meis2
Setbp12	0	1.99624	0.84	0.49	0	6	Setbp1
Tmtc1	0	2.23324	0.823	0.476	0	6	Tmtc1
Foxp12	0	2.00351	0.958	0.67	0	6	Foxp1
Ppp3ca2	0	1.96763	0.909	0.628	0	6	Ppp3ca
Cped14	0	1.78011	0.925	0.661	0	6	Cped1
Rapgef53	8.53286e-308	1.71867	0.753	0.272	2.85185e-303	6	Rapgef5
Pde3a2	1.86195e-305	1.93927	0.845	0.493	6.223e-301	6	Pde3a
Arhgap312	4.10686e-295	1.2834	0.819	0.303	1.37259e-290	6	Arhgap31
Flt12	1.01463e-280	0.632978	0.728	0.218	3.39108e-276	6	Flt1
Shank32	4.37781e-274	1.17441	0.639	0.186	1.46315e-269	6	Shank3
Acvr1	1.66004e-271	2.40835	0.601	0.22	5.5482e-267	6	Acvr1
Plcb12	1.6273e-263	0.927022	0.749	0.229	5.43876e-259	6	Plcb1
Tek2	2.90118e-258	1.51285	0.607	0.2	9.69631e-254	6	Tek
Zfp5211	5.02484e-249	1.68712	0.803	0.488	1.6794e-244	6	Zfp521
Rsu1	8.92427e-248	1.86837	0.702	0.315	2.98267e-243	6	Rsu1
Rdx	2.47685e-244	2.49265	0.554	0.186	8.27814e-240	6	Rdx
Prkch2	1.55525e-228	0.997659	0.676	0.227	5.19796e-224	6	Prkch
Phldb2	6.83105e-221	1.93608	0.65	0.298	2.28307e-216	6	Phldb2
Adgrf52	5.4722e-217	0.795213	0.641	0.215	1.82892e-212	6	Adgrf5
Maml24	5.83537e-216	1.22325	0.879	0.449	1.9503e-211	6	Maml2
Bmpr21	1.57739e-215	1.88777	0.683	0.335	5.27197e-211	6	Bmpr2
Itpr2	1.6737e-214	1.63694	0.734	0.416	5.59383e-210	6	Itpr2
Crim1	1.57834e-211	1.8479	0.703	0.368	5.27513e-207	6	Crim1
Nfib1	4.20375e-205	1.10283	0.912	0.726	1.40498e-200	6	Nfib
Sntb21	3.68863e-199	1.61943	0.561	0.191	1.23281e-194	6	Sntb2
St3gal4	1.32255e-196	2.09165	0.554	0.213	4.42023e-192	6	St3gal4
Sp100	1.28951e-195	1.28721	0.59	0.222	4.30981e-191	6	Sp100
Fgf141	1.13633e-183	2.35874	0.595	0.26	3.79783e-179	6	Fgf14
Egfl72	1.06266e-176	0.866573	0.517	0.178	3.55164e-172	6	Egfl7
Flnb	1.42695e-174	1.25829	0.504	0.161	4.76915e-170	6	Flnb
Rhoj1	5.32876e-173	0.990902	0.677	0.291	1.78098e-168	6	Rhoj
Tshz22	5.19155e-166	0.791439	0.781	0.358	1.73512e-161	6	Tshz2
Pde7b1	8.31614e-163	1.76857	0.692	0.402	2.77942e-158	6	Pde7b
Nfia1	1.35698e-159	0.95144	0.921	0.795	4.53529e-155	6	Nfia
March3	1.27572e-155	2.28732	0.573	0.29	4.26371e-151	6	2024-03-03
Itga9	3.79566e-155	1.91768	0.564	0.28	1.26858e-150	6	Itga9
Pkp41	3.11644e-152	1.48544	0.682	0.409	1.04158e-147	6	Pkp4
Tanc12	9.66554e-150	1.162	0.707	0.379	3.23042e-145	6	Tanc1
Gnaq3	1.3845e-149	1.06995	0.803	0.542	4.62729e-145	6	Gnaq
Hand2os11	1.65683e-148	2.1655	0.508	0.243	5.53745e-144	6	Hand2os1
Ralgapa21	1.54242e-145	1.35676	0.778	0.467	5.15509e-141	6	Ralgapa2
Aplp2	1.61712e-137	1.64611	0.545	0.231	5.40473e-133	6	Aplp2
Smg6	8.19154e-132	1.39993	0.714	0.496	2.73778e-127	6	Smg6
Gls1	1.35474e-129	1.60132	0.606	0.297	4.52782e-125	6	Gls
Dock41	3.56938e-129	0.949927	0.768	0.483	1.19296e-124	6	Dock4
Dapk1	1.01401e-128	1.66737	0.574	0.318	3.38902e-124	6	Dapk1
Hdac7	4.82938e-120	1.39039	0.54	0.237	1.61407e-115	6	Hdac7
Mat2a	6.96261e-119	1.76403	0.589	0.334	2.32704e-114	6	Mat2a
Rbms12	2.34325e-113	0.836087	0.863	0.704	7.83159e-109	6	Rbms1
Syne23	8.75715e-112	0.966818	0.604	0.269	2.92681e-107	6	Syne2
Akt34	4.2438e-110	0.873796	0.674	0.347	1.41836e-105	6	Akt3
App3	2.4571e-102	0.726576	0.679	0.339	8.21213e-98	6	App
Myo1d2	6.01734e-102	0.733862	0.547	0.235	2.01112e-97	6	Myo1d
Tcf7l11	2.9124e-101	1.21807	0.57	0.304	9.73381e-97	6	Tcf7l1
Ttc283	2.79471e-96	0.863201	0.734	0.461	9.34047e-92	6	Ttc28
Tspan9	8.43778e-93	1.10066	0.532	0.265	2.82008e-88	6	Tspan9
Sh3rf11	6.11201e-92	0.96914	0.503	0.239	2.04276e-87	6	Sh3rf1
Pard32	4.70528e-91	0.979223	0.712	0.521	1.5726e-86	6	Pard3
Man2a1	1.3715e-89	1.56067	0.575	0.359	4.58384e-85	6	Man2a1
Afap1l1	1.31607e-87	1.30261	0.507	0.271	4.39855e-83	6	Afap1l1
Fryl1	1.11649e-86	1.03927	0.635	0.416	3.73152e-82	6	Fryl
Mcu	6.94687e-86	1.42778	0.524	0.307	2.32178e-81	6	Mcu
Sgms12	8.59699e-86	0.828767	0.724	0.542	2.87329e-81	6	Sgms1
Rere	1.83576e-85	0.815903	0.796	0.669	6.13548e-81	6	Rere
Fbxl73	8.0568e-78	0.774996	0.617	0.342	2.69274e-73	6	Fbxl7
Stk3	7.80252e-75	1.03297	0.579	0.352	2.60776e-70	6	Stk3
Sash11	5.46508e-72	0.899493	0.582	0.323	1.82654e-67	6	Sash1
Pam1	6.48018e-69	1.09977	0.694	0.54	2.16581e-64	6	Pam
Phf21a2	1.66143e-64	0.878142	0.68	0.524	5.55283e-60	6	Phf21a
Mbnl11	3.9157e-63	0.711853	0.778	0.671	1.3087e-58	6	Mbnl1
Fchsd21	4.96621e-62	0.990248	0.559	0.381	1.65981e-57	6	Fchsd2
4931406P16Rik2	8.1707e-61	0.83882	0.526	0.303	2.73081e-56	6	4931406P16Rik
Etv62	6.07995e-60	0.623456	0.683	0.475	2.03204e-55	6	Etv6
Zmiz1	6.50158e-59	1.08418	0.597	0.437	2.17296e-54	6	Zmiz1
Pbx11	8.14544e-57	0.772466	0.799	0.65	2.72237e-52	6	Pbx1
Rasal22	2.97683e-54	0.668978	0.724	0.576	9.94916e-50	6	Rasal2
Diaph23	4.55329e-52	0.617828	0.772	0.669	1.5218e-47	6	Diaph2
Cd2ap	2.20326e-49	1.01774	0.551	0.411	7.36374e-45	6	Cd2ap
Zfr	9.211e-46	1.01805	0.572	0.447	3.0785e-41	6	Zfr
Ogt1	6.50896e-45	0.887387	0.613	0.483	2.17542e-40	6	Ogt
Airn2	3.03132e-44	0.907407	0.681	0.624	1.01313e-39	6	Airn
Baz2b1	6.24821e-44	0.618632	0.73	0.633	2.08828e-39	6	Baz2b
Wwtr11	3.34095e-43	0.759011	0.556	0.391	1.11661e-38	6	Wwtr1
Ube2h	2.07983e-42	0.950536	0.584	0.459	6.9512e-38	6	Ube2h
Ltbp11	1.52415e-40	1.4066	0.522	0.403	5.094e-36	6	Ltbp1
Rbfox21	3.34694e-40	0.649222	0.683	0.594	1.11861e-35	6	Rbfox2
Numb2	2.61307e-37	0.794489	0.54	0.378	8.7334e-33	6	Numb
Arhgef31	7.41954e-36	0.667569	0.593	0.459	2.47976e-31	6	Arhgef3
Ppp1r12a	1.775e-34	0.622869	0.651	0.563	5.93239e-30	6	Ppp1r12a
Agap1	1.89853e-33	0.755358	0.582	0.467	6.34526e-29	6	Agap1
Ankrd12	1.01517e-32	0.714224	0.537	0.404	3.3929e-28	6	Ankrd12
Spag91	5.97421e-31	0.635859	0.67	0.59	1.9967e-26	6	Spag9
Sptan1	1.26764e-30	0.728365	0.517	0.39	4.23672e-26	6	Sptan1
Abi11	1.14247e-29	0.722567	0.513	0.373	3.81838e-25	6	Abi1
Gphn1	1.20244e-28	0.606146	0.785	0.745	4.01878e-24	6	Gphn
Ttc3	2.93839e-28	0.812036	0.508	0.405	9.82069e-24	6	Ttc3
Lama42	4.23749e-27	0.622783	0.549	0.411	1.41625e-22	6	Lama4
Ddx171	1.54756e-24	0.610527	0.596	0.501	5.17227e-20	6	Ddx17
Lars2	4.66153e-19	0.732014	0.5	0.345	1.55798e-14	6	Lars2
Btbd91	1.926e-18	0.58522	0.547	0.483	6.43706e-14	6	Btbd9
Nrp11	4.53972e-17	0.789789	0.689	0.66	1.51727e-12	6	Nrp1
Smyd3	2.08169e-12	0.609292	0.528	0.476	6.95741e-08	6	Smyd3

## Sheet: 7(SMC)
SMC	p_val	avg_log2FC	pct.1	pct.2	p_val_adj	cluster	gene
Myh11	0	10.1335	0.943	0.005	0	7	Myh11
Dgkb	0	6.7571	0.963	0.038	0	7	Dgkb
Kcnab1	0	8.50077	0.918	0.019	0	7	Kcnab1
Notch31	0	3.72847	0.904	0.102	0	7	Notch3
Mrvi11	0	3.81828	0.865	0.091	0	7	Mrvi1
Mylk	0	4.84883	0.818	0.06	0	7	Mylk
Sox53	0	2.69134	0.963	0.225	0	7	Sox5
Sntb11	0	4.17111	0.835	0.111	0	7	Sntb1
Acta2	0	7.81144	0.733	0.01	0	7	Acta2
Gucy1a11	0	3.89818	0.775	0.072	0	7	Gucy1a1
Gpc62	0	1.78266	0.938	0.235	0	7	Gpc6
Slc38a11	0	9.00419	0.702	0.002	0	7	Slc38a11
Cald11	0	3.15644	0.945	0.251	0	7	Cald1
Flna	0	4.20894	0.795	0.112	0	7	Flna
Carmn1	0	4.01407	0.823	0.164	0	7	Carmn
Lmod1	0	9.05656	0.642	0.002	0	7	Lmod1
Cabp1	0	4.83124	0.669	0.037	0	7	Cabp1
Olfr78	0	11.8578	0.611	0	0	7	Olfr78
Rasl12	0	4.25789	0.649	0.041	0	7	Rasl12
Rbms32	0	1.19261	0.885	0.283	0	7	Rbms3
Plcl11	0	1.90091	0.847	0.246	0	7	Plcl1
Gucy1a22	0	2.3496	0.76	0.16	0	7	Gucy1a2
Mamdc2	0	5.39541	0.619	0.028	0	7	Mamdc2
Ccdc3	0	8.11507	0.584	0.004	0	7	Ccdc3
Wtip	0	4.59508	0.592	0.036	0	7	Wtip
Plekhg3	0	3.15925	0.658	0.103	0	7	Plekhg3
Cacnb41	0	3.4919	0.618	0.066	0	7	Cacnb4
Slit31	0	2.47773	0.675	0.123	0	7	Slit3
Itga8	0	4.46763	0.592	0.045	0	7	Itga8
Map21	0	3.31203	0.626	0.08	0	7	Map2
Actn1	0	3.86938	0.652	0.107	0	7	Actn1
Pde1a2	0	2.35188	0.696	0.154	0	7	Pde1a
Ano11	0	3.46393	0.603	0.063	0	7	Ano1
Tagln	0	8.23947	0.543	0.003	0	7	Tagln
Mark1	0	4.62255	0.595	0.056	0	7	Mark1
Sema5a1	0	3.00573	0.629	0.093	0	7	Sema5a
Entpd11	0	2.97422	0.628	0.096	0	7	Entpd1
Ctnna31	0	1.85126	0.935	0.411	0	7	Ctnna3
Frmd4b2	0	1.79154	0.757	0.237	0	7	Frmd4b
Errfi11	0	1.92856	0.635	0.124	0	7	Errfi1
Kalrn2	0	2.80808	0.816	0.306	0	7	Kalrn
Ebf22	0	1.39791	0.708	0.202	0	7	Ebf2
Serpini11	0	2.80693	0.565	0.061	0	7	Serpini1
Plce11	0	3.10262	0.859	0.355	0	7	Plce1
Tbc1d11	0	2.2901	0.639	0.137	0	7	Tbc1d1
Zfhx32	0	2.30521	0.84	0.34	0	7	Zfhx3
Atp2b4	0	2.87899	0.597	0.099	0	7	Atp2b4
Cacnb21	0	1.79392	0.922	0.427	0	7	Cacnb2
Mertk1	0	2.67356	0.607	0.114	0	7	Mertk
Daam2	0	3.71732	0.54	0.052	0	7	Daam2
Rbpms2	0	3.88926	0.6	0.117	0	7	Rbpms2
Ppm1e	0	3.73391	0.641	0.158	0	7	Ppm1e
Tbx2	0	4.43009	0.505	0.027	0	7	Tbx2
Ngf2	0	2.02857	0.624	0.149	0	7	Ngf
Pdlim3	0	3.49538	0.58	0.108	0	7	Pdlim3
Pde3a3	0	2.73115	0.963	0.492	0	7	Pde3a
Synpo21	0	2.50712	0.859	0.389	0	7	Synpo2
Zbtb7c	0	2.14893	0.611	0.143	0	7	Zbtb7c
Rcan21	0	1.87843	0.869	0.402	0	7	Rcan2
Gucy1b11	0	2.96501	0.536	0.071	0	7	Gucy1b1
Trpc31	0	0.917338	0.54	0.076	0	7	Trpc3
Chrm31	0	3.08041	0.503	0.039	0	7	Chrm3
P3h2	0	3.26799	0.52	0.058	0	7	P3h2
Dgkg	0	5.48039	0.506	0.045	0	7	Dgkg
Rgs7bp	0	4.44536	0.515	0.055	0	7	Rgs7bp
Itpk1	0	4.0197	0.518	0.06	0	7	Itpk1
Cap21	0	2.70303	0.771	0.314	0	7	Cap2
Gjc11	0	2.77696	0.574	0.12	0	7	Gjc1
Mast43	0	2.19159	0.981	0.533	0	7	Mast4
Mcam	0	3.26128	0.503	0.056	0	7	Mcam
Pdgfrb1	0	1.77657	0.544	0.102	0	7	Pdgfrb
Prkg12	0	2.95454	0.989	0.548	0	7	Prkg1
Ntn4	0	3.47044	0.527	0.088	0	7	Ntn4
Map1b	0	2.89084	0.523	0.086	0	7	Map1b
Adcy5	0	3.76782	0.552	0.122	0	7	Adcy5
Olfr1033	0	2.699	0.598	0.169	0	7	Olfr1033
Map3k202	0	2.40176	0.799	0.394	0	7	Map3k20
Cobll12	0	2.07036	0.799	0.398	0	7	Cobll1
Wnt5b	0	3.78694	0.529	0.13	0	7	Wnt5b
Thsd41	0	3.37879	0.604	0.205	0	7	Thsd4
Ctdspl	0	2.23855	0.502	0.109	0	7	Ctdspl
Adcy9	0	2.33337	0.73	0.339	0	7	Adcy9
Ppp1r12a1	0	2.71145	0.903	0.56	0	7	Ppp1r12a
Fry1	0	1.8661	0.932	0.619	0	7	Fry
Lpp1	0	2.35529	0.914	0.641	0	7	Lpp
Rbpms1	0	1.83491	0.942	0.672	0	7	Rbpms
Dlc11	0	1.25284	0.975	0.732	0	7	Dlc1
Farp11	2.30807e-288	1.92766	0.682	0.239	7.71404e-284	7	Farp1
Dock101	2.20472e-284	1.53067	0.54	0.149	7.3686e-280	7	Dock10
Arhgap62	1.88168e-279	1.70719	0.832	0.446	6.28894e-275	7	Arhgap6
Ebf14	1.82232e-267	1.1	0.955	0.457	6.09056e-263	7	Ebf1
Myo1d3	4.23492e-264	1.66253	0.686	0.233	1.4154e-259	7	Myo1d
Msrb31	1.00224e-258	2.02802	0.771	0.469	3.34967e-254	7	Msrb3
Crim11	6.16307e-257	2.50216	0.728	0.368	2.05982e-252	7	Crim1
Lrrtm31	1.9056e-253	2.186	0.671	0.29	6.3689e-249	7	Lrrtm3
St6gal1	7.9705e-246	2.04774	0.583	0.204	2.6639e-241	7	St6gal1
Hip11	3.35892e-233	1.70094	0.719	0.323	1.12262e-228	7	Hip1
Igfbp72	1.20039e-230	1.36466	0.674	0.254	4.01194e-226	7	Igfbp7
Syne24	7.78665e-223	1.60782	0.691	0.268	2.60245e-218	7	Syne2
Rock11	1.95827e-221	1.72884	0.781	0.515	6.54493e-217	7	Rock1
Crtc31	2.814e-221	2.10103	0.655	0.308	9.40496e-217	7	Crtc3
Myh92	1.47681e-220	1.49242	0.685	0.257	4.93578e-216	7	Myh9
Epn2	9.81999e-213	1.90953	0.577	0.205	3.28204e-208	7	Epn2
Utrn3	8.20545e-212	1.51797	0.86	0.661	2.74243e-207	7	Utrn
Camk2g	7.65656e-203	2.49312	0.563	0.238	2.55898e-198	7	Camk2g
Tsc22d1	1.18329e-202	2.14217	0.527	0.165	3.9548e-198	7	Tsc22d1
Fchsd22	7.87154e-201	1.79033	0.706	0.38	2.63083e-196	7	Fchsd2
Ppm1l1	2.89189e-200	2.53758	0.596	0.285	9.66526e-196	7	Ppm1l
Actn41	5.05581e-200	2.04455	0.627	0.272	1.68975e-195	7	Actn4
Itpr12	2.23947e-197	1.4253	0.822	0.602	7.48475e-193	7	Itpr1
Lhfp2	9.3787e-196	1.18558	0.805	0.438	3.13455e-191	7	Lhfp
Maml31	2.52673e-193	1.63922	0.761	0.474	8.44483e-189	7	Maml3
Sorbs21	8.44712e-188	1.82538	0.752	0.419	2.8232e-183	7	Sorbs2
Phldb21	7.77909e-181	2.1334	0.613	0.298	2.59993e-176	7	Phldb2
St52	1.1501e-176	1.70002	0.686	0.355	3.84386e-172	7	St5
Filip11	7.89035e-175	1.69688	0.754	0.501	2.63711e-170	7	Filip1
Rap1a	3.46606e-172	1.76015	0.654	0.32	1.15842e-167	7	Rap1a
Lrch13	4.12829e-171	1.55726	0.736	0.478	1.37976e-166	7	Lrch1
Dmd1	5.88812e-169	1.05626	0.868	0.405	1.96793e-164	7	Dmd
Itga13	6.67667e-168	1.1993	0.682	0.266	2.23148e-163	7	Itga1
Rgs61	5.00283e-166	1.31691	0.685	0.37	1.67205e-161	7	Rgs6
Pls3	3.32043e-165	1.95844	0.553	0.243	1.10975e-160	7	Pls3
Ednra1	2.17402e-164	2.03045	0.523	0.224	7.26599e-160	7	Ednra
Syne12	1.10455e-163	1.19531	0.79	0.512	3.69162e-159	7	Syne1
Myom11	8.21423e-162	1.61396	0.627	0.304	2.74536e-157	7	Myom1
Mical2	1.97604e-161	2.37554	0.567	0.287	6.60432e-157	7	Mical2
Tpm11	2.47646e-155	1.1911	0.795	0.468	8.27682e-151	7	Tpm1
Pakap2	2.09928e-150	2.00073	0.549	0.275	7.01621e-146	7	Pakap
Mef2c4	7.58636e-150	1.21485	0.782	0.543	2.53551e-145	7	Mef2c
Esyt21	6.69789e-143	1.63799	0.623	0.333	2.23857e-138	7	Esyt2
Rhoj2	1.81144e-138	0.924638	0.643	0.292	6.0542e-134	7	Rhoj
Ssbp22	1.83688e-138	1.53868	0.643	0.38	6.13922e-134	7	Ssbp2
Rasal23	3.29493e-138	1.03297	0.804	0.575	1.10123e-133	7	Rasal2
Frmd4a1	2.73618e-133	1.48271	0.615	0.332	9.14486e-129	7	Frmd4a
Sox61	3.98897e-124	1.2345	0.689	0.393	1.33319e-119	7	Sox6
Fbxl17	6.41737e-124	1.02521	0.825	0.685	2.14481e-119	7	Fbxl17
Mfhas1	2.02169e-123	1.65148	0.579	0.33	6.75688e-119	7	Mfhas1
Inpp5a	2.04335e-123	1.58925	0.61	0.356	6.82928e-119	7	Inpp5a
Arhgef7	7.19088e-123	2.06787	0.509	0.255	2.40334e-118	7	Arhgef7
Asap2	2.08924e-122	1.41616	0.552	0.266	6.98265e-118	7	Asap2
Ror12	8.23174e-119	1.52247	0.655	0.399	2.75121e-114	7	Ror1
Ppp1r12b1	9.74454e-114	1.02474	0.764	0.477	3.25682e-109	7	Ppp1r12b
Myo1e1	2.99702e-112	1.1418	0.516	0.214	1.00166e-107	7	Myo1e
Ralgapa22	3.41701e-107	1.05936	0.745	0.468	1.14203e-102	7	Ralgapa2
Ltbp12	3.91153e-107	1.79584	0.599	0.402	1.30731e-102	7	Ltbp1
Mprip1	5.05989e-102	1.20509	0.65	0.42	1.69112e-97	7	Mprip
Atp2b11	5.85814e-102	1.30783	0.632	0.398	1.95791e-97	7	Atp2b1
Ano61	1.46071e-101	1.11452	0.578	0.285	4.882e-97	7	Ano6
Mapre21	3.35152e-100	1.62269	0.553	0.327	1.12014e-95	7	Mapre2
Akap61	9.34081e-93	0.695587	0.778	0.422	3.12189e-88	7	Akap6
9530026P05Rik2	1.83497e-89	1.03824	0.68	0.46	6.13282e-85	7	9530026P05Rik
Ppp1cb	2.8337e-87	1.4698	0.537	0.322	9.47078e-83	7	Ppp1cb
Pip5k1b1	9.76299e-87	1.37856	0.554	0.347	3.26299e-82	7	Pip5k1b
Arhgap102	5.1562e-83	1.40235	0.633	0.458	1.7233e-78	7	Arhgap10
Vcl	9.73212e-81	1.23105	0.599	0.408	3.25267e-76	7	Vcl
Prdm161	1.15939e-75	1.51753	0.506	0.329	3.87491e-71	7	Prdm16
Pbx12	3.37859e-74	0.772507	0.814	0.65	1.12919e-69	7	Pbx1
Rapgef54	1.14529e-67	0.655031	0.547	0.275	3.8278e-63	7	Rapgef5
Cacna2d11	4.70584e-62	0.714003	0.704	0.478	1.57279e-57	7	Cacna2d1
Igf1r2	3.28645e-61	1.03682	0.676	0.541	1.0984e-56	7	Igf1r
Pten2	3.82615e-59	1.05443	0.584	0.394	1.27878e-54	7	Pten
Filip1l1	1.0786e-58	0.770122	0.717	0.451	3.60489e-54	7	Filip1l
Jph21	1.08141e-58	0.958717	0.555	0.377	3.6143e-54	7	Jph2
Ttc284	1.52485e-56	0.749665	0.67	0.463	5.09635e-52	7	Ttc28
Inpp4b2	5.38592e-54	1.32851	0.573	0.439	1.80008e-49	7	Inpp4b
Tnfaip81	1.54692e-52	1.19595	0.541	0.377	5.17012e-48	7	Tnfaip8
Aopep	3.99667e-52	1.04169	0.614	0.484	1.33577e-47	7	Aopep
Arid5b	5.21007e-51	1.18148	0.505	0.336	1.74131e-46	7	Arid5b
Ptprk2	1.20384e-50	0.827639	0.626	0.484	4.02346e-46	7	Ptprk
Gm207321	3.26637e-49	1.2307	0.508	0.353	1.09169e-44	7	Gm20732
Bmpr1a1	9.61451e-47	1.04542	0.554	0.404	3.21336e-42	7	Bmpr1a
Fermt21	1.76174e-43	0.905989	0.573	0.432	5.88808e-39	7	Fermt2
Pard33	5.36286e-38	0.667904	0.646	0.522	1.79238e-33	7	Pard3
Pakap.12	3.59782e-32	0.685881	0.597	0.483	1.20247e-27	7	Pakap.1
Bcas3	4.59503e-31	0.756289	0.635	0.556	1.53575e-26	7	Bcas3
Rbfox22	4.62059e-29	0.615432	0.655	0.595	1.54429e-24	7	Rbfox2
Itgb1	3.51196e-26	0.817827	0.503	0.361	1.17377e-21	7	Itgb1
Nptn	2.35288e-24	0.764019	0.514	0.413	7.8638e-20	7	Nptn
Celf1	5.26918e-16	0.61484	0.501	0.429	1.76107e-11	7	Celf1
Clasp2	2.19616e-15	0.804637	0.541	0.501	7.34e-11	7	Clasp2
																		Ndfip1
																		Sash1
																		Dock1
																		Atxn7
																		Sh3bgrl
																		Plekhm3
																		Timp2
																		Myo9a
																		Glud1
																		Tshz3
																		Itsn2
																		Vps13c
																		Zfp704
																		Cdc42
																		Osbpl8
																		Fam13b
																		Rasa1
																		Git2
																		Tcf20
																		Ccnl1
																		Ccnd3
																		Ulk2
																		Fnip1
																		Jmjd1c
																		Papd4
																		Peli1
																		Dnm2
																		Rsrp1
																		Rnf13
																		BC005537
																		Cyth1
																		Tab2
																		Pacs1
																		Tnrc18
																		Pak2
																		Zfand6
																		Sdcbp
																		Gas6
																		Heatr5a
																		Ppp4r1
																		Nek7
																		Sgk3
																		Stx16
																		Elf2
																		Nisch
																		Spred1
																		Tpr
																		Dmxl1
																		Nfe2l2
																		Vps41
																		Rcsd1
																		Agps
																		Fbxw4
																		Crlf3
																		2310035C23Rik
																		Exoc5
																		Rhoq
																		Pacsin2
																		Sp3
																		Ubac2
																		Ptp4a2
																		Capza1
																		Bicra
																		Cdk6
																		Nsf
																		Btaf1
																		Rassf3
																		Zufsp
																		Btbd1

## Sheet: 8(CM_1)
CM_1	p_val	avg_log2FC	pct.1	pct.2	p_val_adj	cluster	gene
Tnnt21	0	2.66644	0.943	0.394	0	8	Tnnt2
Myh61	0	1.42328	0.955	0.437	0	8	Myh6
Myl3	0	3.71648	0.691	0.176	0	8	Myl3
Myl21	0	3.11433	0.782	0.292	0	8	Myl2
mt-Co1	0	2.68404	0.643	0.172	0	8	mt-Co1
mt-Co3	0	3.36499	0.553	0.096	0	8	mt-Co3
Neat11	0	2.31923	0.946	0.531	0	8	Neat1
Pln1	7.03584e-263	1.815	0.803	0.393	2.35152e-258	8	Pln
Mybpc31	1.9627e-235	2.45708	0.694	0.345	6.55972e-231	8	Mybpc3
Vegfa1	3.20388e-233	2.67025	0.647	0.343	1.0708e-228	8	Vegfa
Dmpk1	1.93889e-222	3.25801	0.606	0.296	6.48015e-218	8	Dmpk
Coro61	1.58028e-221	2.68636	0.634	0.337	5.28161e-217	8	Coro6
Pde4dip1	3.62772e-208	1.38173	0.83	0.401	1.21246e-203	8	Pde4dip
Ivns1abp1	6.12825e-206	1.99571	0.697	0.393	2.04818e-201	8	Ivns1abp
Tnni3	6.51951e-206	2.9812	0.651	0.236	2.17895e-201	8	Tnni3
Mb	1.38939e-181	3.53981	0.55	0.104	4.64362e-177	8	Mb
Gm312511	4.09689e-171	1.71006	0.577	0.307	1.36926e-166	8	Gm31251
Ddx5	8.07059e-159	2.06194	0.713	0.605	2.69735e-154	8	Ddx5
Smtn1	3.49282e-158	2.64175	0.594	0.352	1.16737e-153	8	Smtn
Rsrp12	1.76007e-144	2.39042	0.655	0.503	5.88251e-140	8	Rsrp1
Atp2a21	1.59508e-130	1.11349	0.789	0.41	5.33108e-126	8	Atp2a2
Actc1	5.50708e-119	2.79114	0.586	0.267	1.84058e-114	8	Actc1
Tcap1	5.26123e-90	2.80092	0.509	0.253	1.75841e-85	8	Tcap
Tpm12	1.25573e-76	1.40837	0.645	0.47	4.19691e-72	8	Tpm1
Tnnc11	3.15372e-67	2.44834	0.524	0.321	1.05404e-62	8	Tnnc1
Slc25a4	1.46606e-50	2.24268	0.509	0.293	4.89987e-46	8	Slc25a4
Ldb31	2.26853e-47	0.897016	0.552	0.399	7.58189e-43	8	Ldb3
Srrm2	5.35107e-08	0.896912	0.326	0.514	0.00178844	8	Srrm2

[truncated: 6 more sheets: 9(EC-lym), 10(CyC), 11(CM_2), 12(BC), 13(SC), 14(TC)]
