# Supplementary material for: Cardiorenal heart failure with preserved ejection fraction is caused by a reversible rise of mineralocorticoid-induced fibroblast subtypes
Source: Research Square preprint supplement (doi:10.21203/rs.3.rs-7039115/v1), 2025-07-14
Supplement: Supplementary file 9 [file 9386a1b9d9da6750a815a714.xlsx]

## Sheet: DEGs ALDOvsCTRL HFDvsCTRL
ALDO vs. CTRL	p_val	avg_log2FC	pct.1	pct.2	p_val_adj		HFD vs. CTRL	p_val	avg_log2FC	pct.1	pct.2	p_val_adj			ALDO vs. CTRL avg_log2FC	HFD/L-NAME vs. CTRL avg_log2FC
Atp2a2	4.16068e-06	10.1278	0.047	0	0.0822442		Ahsg	0.000120998	2.30607	0.014	0.007	1		Serpine1	3.46518	0
Esrrg	4.10223e-06	9.71745	0.025	0	0.0810888		Cckbr	1.8339e-06	2.14256	0.01	0.003	0.0362506		Tbc1d4	3.15209	0
Naa40	0.0217055	9.57843	0.03	0	1		Plcd4	7.2655e-07	2.02902	0.012	0.004	0.0143617		Mical3	3.12261	0
Cpeb3	3.54909e-14	9.48384	0.042	0	7.01548e-10		Htr2b	2.40385e-10	1.83694	0.021	0.007	4.75168e-06		Phactr2	3.05188	0
Sox6	1.98461e-09	9.05334	0.019	0	3.92297e-05		S100b	2.49283e-06	1.79747	0.013	0.005	0.0492758		Pygb	2.7477	0
Coq10a	0.171892	8.75869	0.022	0	1		Cabyr	3.19577e-08	1.75777	0.016	0.005	0.000631707		Taf4b	2.41523	0
Gpr146	1.87794e-06	8.45852	0.017	0	0.0371212		Atp8b5	1.15986e-07	1.70633	0.012	0.003	0.00229269		Ablim1	2.18153	-0.305614
Ano4	0.000217789	8.44558	0.034	0	1		Xlr3b	2.41332e-07	1.68466	0.012	0.003	0.00477042		Postn	2.17668	0
Enah	0.0140386	8.07261	0.016	0	1		Slc1a7	5.66831e-05	1.66017	0.011	0.004	1		Fry	2.08936	-0.389564
Igflr1	0.0156545	7.99414	0.01	0	1		Ccr9	4.88361e-08	1.65632	0.019	0.007	0.000965343		Pcdh7	2.07779	-0.269861
Herc3	0.803251	7.89934	0.012	0	1		Acta1	2.63815e-07	1.64223	0.015	0.005	0.00521483		Wnt5b	2.07443	0
Cmya5	0.480143	7.7491	0.011	0	1		Trim43c	5.00238e-08	1.63396	0.017	0.006	0.00098882		Dbp	1.89648	0.261536
Usp13	0.00214566	7.72145	0.017	0	1		Kcnj13	7.50689e-08	1.5751	0.018	0.007	0.00148389		Galnt18	1.84603	0
Fign	0.0452836	7.70591	0.013	0	1		Plcxd1	2.29406e-06	1.55113	0.013	0.004	0.0453467		Id3	1.80046	0.815067
Cand2	0.0148215	7.69559	0.01	0	1		Ascl4	2.44605e-09	1.53383	0.023	0.009	4.8351e-05		Slc8a1	1.7853	-0.365911
Tmem150a	0.0218358	7.66428	0.01	0	1		Pold4	2.30174e-09	1.47699	0.029	0.013	4.54984e-05		Nckap5	1.77018	0
Zfp827	0.0201745	7.63858	0.016	0	1		Mrps34	4.12027e-07	1.46401	0.018	0.007	0.00814454		Epn1	1.76817	0
Nudt7	2.7101e-05	6.99325	0.01	0	0.535706		B3gat2	1.51007e-05	1.4349	0.017	0.008	0.298495		Rgl2	1.72563	0
Nos1ap	8.3123e-05	6.9864	0.01	0	1		Rab26	0.000175158	1.43391	0.011	0.004	1		Dusp1	1.68828	0
Nudt8	0.0229276	6.22215	0.01	0	1		Hdc	0.00766682	1.42817	0.011	0.006	1		Adamtsl5	1.67228	0
Fblim1	7.97824e-14	5.30199	0.068	0.003	1.57706e-09		Hpgds	1.61393e-07	1.4218	0.022	0.009	0.00319025		Limch1	1.64334	-0.342048
Jph2	2.02162e-09	5.22434	0.016	0.001	3.99614e-05		Tspan11	2.68291e-06	1.4208	0.017	0.007	0.053033		Per1	1.60418	0.295391
Ndufaf4	6.924e-08	5.00602	0.029	0.002	0.00136867		Mettl23	2.91042e-21	1.40929	0.064	0.026	5.75304e-17		Kidins220	1.5973	0
Cep85	0.0159991	5.00467	0.014	0.001	1		B3galt2	1.26459e-13	1.39737	0.043	0.019	2.49972e-09		Pde1c	1.59004	0
Ctsf	4.83814e-05	4.8663	0.011	0	0.956356		Clec9a	1.70064e-05	1.38934	0.013	0.005	0.336165		Inpp4b	1.57748	0
Arhgef5	6.72393e-06	4.5191	0.018	0.001	0.132912		Epo	0.000219943	1.35246	0.014	0.007	1		Dcun1d2	1.56877	0
Usp20	1.14103e-05	4.49889	0.024	0.002	0.225547		Slc18a2	5.99393e-06	1.34728	0.018	0.008	0.118482		Adgrl2	1.55292	-0.450715
Ttll1	0.42349	4.48196	0.013	0.001	1		Ifitm5	1.35693e-06	1.3472	0.014	0.005	0.0268224		Tsc22d3	1.5104	0
Ttc12	4.17528e-05	4.4679	0.024	0.002	0.825328		Spsb2	9.56436e-08	1.34506	0.014	0.005	0.00189059		Tspan4	1.47696	0
Cd36	1.74478e-08	4.38713	0.014	0.001	0.00034489		Fndc4	0.000656646	1.33732	0.016	0.009	1		Bhlhe41	1.43743	0
Sirt3	4.84089e-05	4.37191	0.026	0.002	0.9569		Serpine3	0.00013981	1.32861	0.01	0.004	1		Qk	1.41876	-0.200192
Ednra	0.000166623	4.15302	0.011	0.001	1		Scg3	0.00398064	1.31853	0.011	0.006	1		Nkain3	1.38378	0.735222
Ciapin1	0.0020138	4.12909	0.024	0.003	1		Kcnq5	0.00602392	1.30193	0.01	0.016	1		Slc6a6	1.36222	0
Pde4b	1.96216e-19	4.12431	0.016	0.001	3.87861e-15		Prr33	7.55299e-12	1.295	0.029	0.011	1.493e-07		Wee1	1.31718	0
Lrrfip1	1.79683e-07	3.94767	0.053	0.005	0.00355179		Glp2r	9.37089e-09	1.28926	0.022	0.009	0.000185234		Ctsd	1.30357	0
Filip1l	6.14698e-18	3.85594	0.051	0.003	1.21507e-13		Clvs1	4.34721e-18	1.28908	0.055	0.023	8.59312e-14		Eif2s3y	1.30336	0
Hmcn1	0.00489425	3.80328	0.034	0.003	1		Dkk3	1.52222e-05	1.28357	0.023	0.012	0.300898		Cnst	1.26926	0
Smim20	0.366412	3.71357	0.011	0.001	1		Ccne2	7.13819e-06	1.28249	0.018	0.008	0.141101		Ppp1r12b	1.26884	-0.313104
Ifrd2	0.163986	3.7132	0.01	0.001	1		Rec114	3.34554e-12	1.26345	0.039	0.017	6.61314e-08		Zc3h11a	1.26821	-0.790494
Dtna	9.04005e-08	3.71201	0.014	0.001	0.00178695		Morn3	0.000482748	1.25654	0.011	0.005	1		Plekhm2	1.25613	0
Josd2	0.241247	3.52876	0.011	0.001	1		Skida1	3.45684e-11	1.25556	0.038	0.017	6.83313e-07		Grm8	1.23592	0
Serpine1	2.41055e-112	3.46518	0.155	0.015	4.76494e-108		Ddt	0.000299027	1.24718	0.011	0.005	1		Hhipl1	1.23443	0
Usp28	3.56979e-05	3.42779	0.022	0.001	0.70564		Ubb	1.32286e-52	1.24577	0.179	0.082	2.61489e-48		Pgpep1l	1.21814	0
Entpd6	0.21602	3.34579	0.011	0.002	1		Star	1.37734e-06	1.24511	0.018	0.007	0.0272258		Gfra2	1.21766	0
Frs3	0.000901117	3.24907	0.012	0.002	1		Angptl3	2.00154e-09	1.24262	0.023	0.009	3.95644e-05		Slc27a6	1.21346	0
Tacc2	2.12096e-24	3.22694	0.048	0.005	4.1925e-20		Cr2	1.47283e-05	1.239	0.018	0.009	0.291134		Unc13c	1.21081	0
Galm	9.36712e-06	3.20147	0.033	0.005	0.18516		Ptrhd1	4.41661e-06	1.2355	0.018	0.008	0.0873031		Thsd7b	1.20159	0
Mif4gd	0.184027	3.15761	0.022	0.004	1		Lrrc19	1.32173e-05	1.22698	0.021	0.011	0.261266		Phkg1	1.19309	0
Tbc1d4	5.99528e-16	3.15209	0.093	0.014	1.18509e-11		Coa3	0.000195541	1.21954	0.014	0.007	1		Gtpbp2	1.19128	0
Mylk	0.00222474	3.12583	0.012	0.002	1		Alas2	0.000254248	1.21002	0.012	0.005	1		Chpt1	1.19012	0
Mical3	2.96428e-15	3.12261	0.083	0.01	5.85949e-11		Rnaseh2c	5.8569e-10	1.20842	0.029	0.012	1.15773e-05		Aspn	1.18401	0
Epb41l4a	0.0211008	3.12034	0.011	0.002	1		Uchl4	1.12031e-08	1.20421	0.026	0.011	0.000221451		Trib2	1.17598	0
Phactr2	3.42524e-08	3.05188	0.089	0.012	0.000677067		Egr3	6.35211e-10	1.19536	0.026	0.01	1.25562e-05		Acyp2	1.15247	0
As3mt	0.0181942	3.01299	0.016	0.003	1		Kctd4	1.3606e-06	1.18887	0.018	0.008	0.026895		Pde7a	1.13947	0
Sipa1l2	9.87801e-05	2.9946	0.014	0.002	1		Praf2	0.000676546	1.18747	0.01	0.005	1		Ackr4	1.13541	0.806846
Ank	8.33254e-29	2.97561	0.064	0.005	1.64709e-24		Stmn3	0.00066223	1.18105	0.011	0.005	1		Acad11	1.12417	0
Dusp7	0.000550525	2.96994	0.022	0.004	1		Duox1	0.000110091	1.1785	0.016	0.008	1		Ccnd1	1.1164	0
Slc46a3	0.000876506	2.9657	0.013	0.001	1		Amelx	1.44124e-07	1.17685	0.021	0.009	0.0028489		Grin3a	1.11588	0
Pitpnm2	1.08644e-07	2.89041	0.018	0.004	0.00214756		Prl2c3	8.55276e-09	1.17389	0.031	0.014	0.000169062		Nbl1	1.10731	0
Prkaa2	0.00370438	2.85933	0.021	0.002	1		Socs3	2.30079e-08	1.1664	0.029	0.014	0.000454797		Gdf6	1.09938	0
Hemk1	0.00408579	2.81597	0.019	0.003	1		Nap1l5	1.27788e-05	1.16612	0.02	0.01	0.252598		Pltp	1.08489	0
Pkp4	0.00439009	2.81361	0.024	0.004	1		Acta2	8.19833e-07	1.16355	0.015	0.005	0.0162056		Grm7	1.06547	0
Dgke	0.723353	2.81308	0.011	0.002	1		Ssna1	1.52192e-10	1.16107	0.042	0.021	3.00838e-06		Pcnt	1.05553	0
Slc25a19	0.163223	2.77741	0.011	0.003	1		Rpgrip1	3.65167e-06	1.15898	0.028	0.015	0.0721826		Tef	1.04855	0
Klf15	1.97955e-08	2.77461	0.018	0.003	0.000391299		Eva1b	4.08168e-25	1.15648	0.096	0.046	8.06826e-21		Cdk18	1.03816	0
Ralgapa2	7.27886e-06	2.76939	0.045	0.007	0.143881		Mrpl55	1.85094e-06	1.15508	0.021	0.01	0.0365875		Errfi1	1.03626	-0.11516
Bzw2	0.00220651	2.76718	0.012	0.003	1		Ccdc152	1.14599e-07	1.15154	0.027	0.013	0.00226527		Klhl29	1.03557	0
Rapgef4	7.85536e-05	2.76322	0.015	0.002	1		Gadd45g	1.38845e-06	1.15149	0.024	0.012	0.0274455		Acta1	1.0253	0
Pmf1	0.00175273	2.76168	0.011	0.002	1		Abra	4.76813e-11	1.14867	0.041	0.019	9.42516e-07		Zfp697	1.01673	0
Pygb	1.99953e-08	2.7477	0.032	0.007	0.000395247		Stx19	1.72935e-06	1.14819	0.018	0.008	0.0341841		Bcl2l1	1.01152	0
Whrn	0.211402	2.70411	0.012	0.001	1		Zfp947	0.00423598	1.14796	0.015	0.009	1		Shb	1.01109	0
Il34	0.00131659	2.67475	0.013	0.004	1		Pabpc4l	0.0029205	1.14439	0.011	0.005	1		Gpr39	1.01023	0
Krba1	6.02851e-05	2.65573	0.017	0.003	1		Pycr1	0.000757255	1.1424	0.012	0.006	1		Tmem200a	1.00883	0
Tmtc2	0.00478658	2.64922	0.021	0.004	1		Fam122a	4.49101e-09	1.13686	0.028	0.012	8.87738e-05		Mthfd1l	1.00796	0.474199
Dusp6	0.00870834	2.62144	0.014	0.004	1		Orc1	9.15228e-12	1.12148	0.044	0.021	1.80913e-07		Tspan7	0.998544	0
Larp1b	5.2395e-06	2.62107	0.015	0.002	0.103569		Nupr1	1.50501e-25	1.11562	0.12	0.063	2.97496e-21		Fmo2	0.984742	0
Hecw2	0.000186481	2.60918	0.028	0.006	1		Tmem100	1.72432e-07	1.10786	0.031	0.016	0.00340846		Etl4	0.981459	-0.446978
Arhgap26	5.84189e-23	2.57982	0.036	0.005	1.15477e-18		Nme4	0.000809571	1.10444	0.01	0.005	1		Zfp346	0.978628	0
Tmed4	0.00397935	2.56574	0.022	0.003	1		Dnajc25	1.03821e-11	1.10389	0.039	0.017	2.05224e-07		Pde4a	0.971691	0
Tpra1	0.00639143	2.54427	0.013	0.003	1		Gng8	2.34218e-06	1.10111	0.018	0.007	0.0462979		Per3	0.964835	0.638592
Klc4	0.00344961	2.47299	0.017	0.004	1		Pycard	1.87947e-08	1.09636	0.03	0.014	0.000371516		Syn3	0.958071	0.879566
Taf4b	5.31823e-07	2.41523	0.027	0.006	0.0105125		Klf10	9.34651e-30	1.09181	0.13	0.066	1.84752e-25		Iqsec1	0.936159	0
Pdhb	0.0422678	2.40025	0.034	0.009	1		Rtl1	0.00030957	1.0909	0.014	0.007	1		Rras	0.935303	0
Micall1	0.0285132	2.39733	0.013	0.002	1		Aurkaip1	2.52819e-06	1.08439	0.021	0.01	0.0499746		Lamb2	0.93447	0
Idh3b	0.587288	2.38262	0.019	0.006	1		Trappc1	5.80021e-06	1.08243	0.015	0.006	0.114653		Myl6	0.933707	0.284082
Pkdcc	0.0527748	2.38025	0.011	0.003	1		Tmem258	2.83677e-07	1.08224	0.031	0.016	0.00560745		Mical2	0.932197	0
Dffb	0.0135739	2.35149	0.012	0.004	1		Tnfrsf12a	0.00285565	1.07965	0.019	0.012	1		Cnksr3	0.931852	0
Rad9b	0.0182529	2.34787	0.014	0.003	1		Mycbp	3.42199e-11	1.07868	0.045	0.022	6.76425e-07		Fabp4	0.929257	0
Polr2l	0.000145874	2.30847	0.012	0.002	1		Pigf	2.16526e-11	1.07662	0.045	0.022	4.28007e-07		Slc15a2	0.924829	0.669282
Thsd1	3.5658e-06	2.30421	0.014	0.005	0.0704852		Pram1	3.76352e-11	1.07473	0.051	0.027	7.43935e-07		Smad7	0.919908	0.316968
Atad3a	0.0243878	2.28054	0.017	0.002	1		Plp2	0.00034221	1.07196	0.017	0.009	1		Hlf	0.906647	0
Caskin2	0.00198289	2.27776	0.015	0.004	1		Pebp1	1.15054e-15	1.0666	0.069	0.036	2.27428e-11		Appl2	0.904256	0
Bmi1	0.0252297	2.25307	0.018	0.003	1		Mt1	1.84436e-11	1.06216	0.141	0.101	3.64575e-07		Cd40	0.895861	0
Mrgbp	1.03996e-06	2.21639	0.031	0.005	0.0205568		Dhrs1	1.74833e-07	1.06062	0.029	0.014	0.00345593		Egr1	0.878177	0
Tmx1	0.329439	2.21092	0.019	0.006	1		Nfe2l3	2.81574e-07	1.0592	0.024	0.011	0.00556586		Stc2	0.869219	0
St6gal1	6.67314e-07	2.20871	0.026	0.005	0.0131908		Sptbn2	0.0105932	1.05151	0.011	0.006	1		Clasp1	0.868685	0
Ablim1	5.89791e-137	2.18153	0.4	0.096	1.16584e-132		Tmem240	0.00246327	1.05146	0.013	0.007	1		Rbfox1	0.867271	0
Ddit4	0.00356044	2.17685	0.015	0.004	1		Sycp3	0.000222501	1.04529	0.021	0.012	1		Fmo1	0.86601	0
Postn	1.9651e-25	2.17668	0.073	0.022	3.88441e-21		Mrps22	1.87125e-06	1.04093	0.023	0.012	0.036989		Tll2	0.858325	0.768313
Ets2	0.0158301	2.16109	0.012	0.005	1		Rasgrf1	0.00098004	1.04016	0.012	0.006	1		Tmem204	0.852662	0
Agrn	0.00483445	2.1597	0.01	0.002	1		Rhd	0.000294332	1.03708	0.01	0.004	1		Cyb561	0.850773	0
Ptprb	2.60138e-07	2.14533	0.019	0.005	0.00514215		Lgi2	1.10307e-08	1.03686	0.038	0.02	0.000218044		Map2k3	0.847626	0
Ppm1h	8.06784e-05	2.13425	0.022	0.006	1		Alyref2	0.00049294	1.03499	0.013	0.007	1		Ifrd1	0.843415	0
Mapk1ip1	0.827714	2.09067	0.018	0.004	1		Mrto4	2.31513e-05	1.03449	0.02	0.01	0.457632		Hsph1	0.841191	0
Fry	1.2777e-19	2.08936	0.036	0.006	2.52563e-15		Mas1	1.94288e-05	1.03368	0.016	0.007	0.384049		Elmod3	0.839272	0
Cd27	0.238879	2.08758	0.011	0.002	1		Igf2bp3	1.33965e-18	1.03136	0.08	0.04	2.64809e-14		Slc25a26	0.836455	0
Pcdh7	3.63037e-77	2.07779	0.206	0.038	7.17616e-73		Oxld1	0.000327102	1.02802	0.013	0.007	1		Rreb1	0.833344	0
Wnt5b	1.22385e-09	2.07443	0.05	0.01	2.41918e-05		Psmb5	9.45514e-06	1.02593	0.025	0.014	0.1869		Slk	0.832603	0
Podxl2	0.0153696	2.04992	0.012	0.005	1		Dnah3	0.000179206	1.02417	0.014	0.007	1		Cys1	0.826996	0.476548
Myo18a	0.00875842	2.02393	0.018	0.004	1		Hand2	2.2119e-07	1.02407	0.027	0.013	0.00437226		Rapgef5	0.826133	0
Mrpl3	0.19614	2.00515	0.022	0.006	1		Psenen	1.07433e-07	1.02374	0.034	0.018	0.00212363		Ptpn14	0.825996	0
Efnb2	0.00128594	2.00119	0.011	0.003	1		Otub2	0.000866944	1.02105	0.013	0.007	1		Ddx3y	0.820479	0
AI854703	4.71582e-05	1.99841	0.015	0.005	0.932176		Lrrc4	2.65876e-44	1.02012	0.219	0.121	5.25557e-40		Gpsm1	0.814199	0
Rarb	0.0256415	1.99587	0.022	0.007	1		Myoc	0.00130798	1.01959	0.024	0.015	1		Gli1	0.811577	0
Mtfr1l	0.000468735	1.99181	0.022	0.008	1		Ldlrad2	1.27108e-08	1.0176	0.032	0.015	0.000251254		Clip1	0.80398	0
Pak3	2.21464e-06	1.99076	0.013	0.003	0.0437767		Slc10a1	0.000574828	1.01564	0.011	0.005	1		Zbtb16	0.796551	-0.246306
Rad23a	0.0597797	1.98998	0.028	0.009	1		Lgals1	5.08981e-43	1.01486	0.209	0.114	1.0061e-38		Tsc22d4	0.79456	0.477508
Atp13a2	0.191329	1.93641	0.013	0.004	1		Nnat	0.00085591	1.01449	0.025	0.016	1		Erf	0.782879	0
Rdh13	9.15297e-06	1.93531	0.022	0.006	0.180927		Ormdl2	9.94964e-10	1.00686	0.039	0.02	1.96675e-05		Ankrd10	0.780853	0
Ppip5k2	3.24475e-11	1.91993	0.012	0.003	6.4139e-07		Ccl11	0.000871847	1.00281	0.027	0.018	1		Tmsb4x	0.78062	0.329198
Csf2ra	0.0517685	1.91487	0.015	0.006	1		Lysmd4	1.91357e-43	1.00197	0.201	0.107	3.78256e-39		Usp19	0.771671	0
Tor2a	0.000981799	1.89929	0.014	0.002	1		Myo7b	0.000377576	0.997998	0.015	0.008	1		Flt3l	0.766037	0.40085
Dbp	1.31772e-66	1.89648	0.162	0.035	2.60474e-62		Snapc5	2.31217e-05	0.997369	0.024	0.013	0.457047		Srsf2	0.765334	0
Kifc3	0.00273648	1.88784	0.029	0.01	1		Lynx1	1.02663e-12	0.996411	0.053	0.026	2.02934e-08		Fam214a	0.764262	0
Manba	2.29433e-05	1.87998	0.018	0.005	0.45352		Ptgds	0.000824704	0.991898	0.012	0.006	1		Ace	0.761141	0
Tbc1d24	0.000218011	1.87832	0.015	0.003	1		Hmbs	8.78897e-06	0.984721	0.02	0.01	0.173732		Timp3	0.759476	-0.309905
Etv4	0.000281183	1.8765	0.011	0.003	1		Gapdhs	2.3526e-05	0.983313	0.018	0.009	0.465039		Nr1d2	0.757618	0
Naca	0.000367575	1.8716	0.047	0.01	1		Gng3	0.00582014	0.976755	0.011	0.006	1		Lims2	0.75461	0
Dph3	0.0355153	1.85775	0.025	0.009	1		Tbcc	0.000596107	0.975517	0.018	0.011	1		Unc5b	0.749118	0
Col12a1	1.33091e-05	1.8534	0.016	0.005	0.263081		Atp6v1f	4.02562e-05	0.972913	0.019	0.01	0.795745		Lrrc8a	0.746565	0
Sft2d2	0.00841405	1.85228	0.015	0.006	1		Rpp21	2.57184e-11	0.970257	0.061	0.034	5.08376e-07		Thrb	0.740562	-0.30331
Mfn2	0.000298855	1.85197	0.028	0.005	1		Wnt2b	7.03217e-05	0.968844	0.013	0.006	1		Pde7b	0.738891	0.383131
Galnt18	4.324e-09	1.84603	0.043	0.01	8.54725e-05		Ndufa6	7.64276e-13	0.968111	0.074	0.043	1.51075e-08		Ngef	0.733285	0
Myo19	5.09126e-05	1.82952	0.035	0.01	1		Mrpl41	0.000263702	0.960991	0.022	0.013	1		Leng8	0.731763	0
Ulk3	0.000459008	1.81969	0.023	0.005	1		Ndufaf7	9.12751e-19	0.960682	0.1	0.055	1.80423e-14		Shc3	0.727726	0
Abcc9	2.51148e-06	1.81703	0.014	0.002	0.0496444		Mfap4	3.22065e-08	0.960309	0.036	0.018	0.000636626		Fbl	0.717933	0.701725
Smyd2	0.00110674	1.81677	0.021	0.007	1		Cilp	0.0471421	0.959584	0.016	0.012	1		Sik1	0.710589	0.310906
Tpm2	0.000751195	1.81617	0.018	0.005	1		Ubl5	1.96366e-12	0.956681	0.054	0.027	3.88157e-08		Mgll	0.706599	0
Id3	1.92076e-06	1.80046	0.039	0.007	0.0379677		Dhps	2.60437e-13	0.956457	0.071	0.039	5.14806e-09		Spry4	0.706043	0
Mlycd	4.68804e-06	1.79962	0.037	0.008	0.0926686		BC029722	0.00021697	0.956361	0.02	0.011	1		Lrrc75a	0.703564	0
Slc41a3	0.39873	1.788	0.013	0.005	1		Pglyrp1	0.00228552	0.953062	0.013	0.007	1		Atf1	0.700441	0
Slc8a1	1.12057e-103	1.7853	0.348	0.091	2.21504e-99		Kctd17	1.07482e-05	0.952936	0.026	0.014	0.212461		Pnpla7	0.697866	0
Ndufs3	0.118465	1.78005	0.041	0.019	1		Pwwp2b	0.000280534	0.95282	0.018	0.01	1		Ephx1	0.695138	0
Tspan11	0.00125204	1.77878	0.01	0.002	1		Has1	0.00121864	0.94924	0.012	0.006	1		Abca1	0.69361	-0.311641
Nckap5	2.3856e-72	1.77018	0.249	0.069	4.71562e-68		Frmd5	4.12337e-08	0.948295	0.035	0.018	0.000815066		Man2b1	0.693239	0.438283
Epn1	6.58374e-07	1.76817	0.039	0.011	0.0130141		Slirp	1.14894e-06	0.947934	0.026	0.013	0.022711		Mllt6	0.691776	0
Tbrg4	0.135638	1.76572	0.012	0.005	1		Map3k15	0.000353991	0.945245	0.012	0.006	1		Msi2	0.686201	-0.294502
Tmem38a	0.00369736	1.76301	0.011	0.002	1		Ocel1	8.5509e-10	0.943217	0.051	0.028	1.69026e-05		Sap25	0.68567	0
Serhl	0.288417	1.7582	0.017	0.004	1		Dolk	0.000357948	0.942283	0.022	0.013	1		Pamr1	0.68423	0
Shmt2	0.000740485	1.74407	0.013	0.003	1		Prkcz	2.26325e-05	0.938104	0.032	0.019	0.447376		Atxn2l	0.684072	0.398382
Ddit3	0.00968516	1.7373	0.018	0.005	1		Hspa1a	0.00634745	0.937589	0.013	0.007	1		Ube2q1	0.683723	0
Rgl2	7.95303e-07	1.72563	0.048	0.012	0.0157208		Mcts2	0.00606404	0.93536	0.014	0.009	1		Spsb1	0.679366	0
Osgepl1	0.00097998	1.70307	0.029	0.008	1		Mrpl44	0.00828106	0.93525	0.011	0.006	1		Map7d1	0.676384	0
Mtss1	0.0225704	1.70137	0.017	0.002	1		Timm10b	4.36422e-16	0.933337	0.077	0.04	8.62675e-12		Ap1s1	0.66927	0
Dusp1	3.57957e-26	1.68828	0.082	0.022	7.07573e-22		Dynll1	8.02558e-22	0.933227	0.106	0.056	1.58642e-17		Cpeb1	0.667242	0
Adamtsl5	2.50816e-13	1.67228	0.15	0.045	4.95789e-09		Ccl7	2.88163e-09	0.93256	0.067	0.042	5.69613e-05		Aebp1	0.666525	0.435067
St6galnac3	0.00121053	1.64498	0.01	0.002	1		Mrps26	1.76801e-13	0.931763	0.073	0.041	3.49482e-09		Mat2a	0.664659	0.918756
Limch1	2.39719e-09	1.64334	0.034	0.008	4.73853e-05		Lst1	0.00811459	0.927981	0.01	0.005	1		Jam2	0.66438	0
Cox6a1	0.0400335	1.64215	0.036	0.011	1		Rbmxl1	4.46383e-13	0.925207	0.068	0.037	8.82366e-09		Itga9	0.662312	0
Tmem63b	0.00016678	1.62921	0.054	0.015	1		Mat2a	3.60765e-72	0.918756	0.523	0.371	7.13124e-68		Nfyc	0.658535	0
Rpa2	0.0188228	1.62721	0.012	0.004	1		Cd248	6.96078e-05	0.917709	0.018	0.01	1		Myadm	0.655972	0
Fxyd1	0.00332678	1.61917	0.022	0.006	1		Ssr4	4.67292e-15	0.914773	0.083	0.047	9.23696e-11		Ttc7	0.651362	0
Per1	3.91129e-68	1.60418	0.133	0.044	7.73145e-64		Ptgr1	0.00552438	0.912141	0.01	0.005	1		Ube2b	0.645304	0
Notch4	1.64727e-05	1.60252	0.011	0.004	0.325615		Rad51	0.00198321	0.910806	0.014	0.008	1		Adgrl1	0.641523	0
Lcat	0.00265658	1.60246	0.018	0.004	1		Fxyd4	0.00528592	0.908141	0.011	0.006	1		Mef2c	0.638366	0
Cox8a	0.492736	1.60235	0.028	0.009	1		Iqch	0.000247905	0.906228	0.013	0.006	1		Mast2	0.634832	0
Kidins220	3.51853e-21	1.5973	0.135	0.044	6.95508e-17		Mvk	0.000306237	0.900965	0.016	0.008	1		Zyx	0.633057	0
Adck1	0.00357629	1.59516	0.037	0.012	1		Pebp4	1.80303e-08	0.900073	0.039	0.021	0.000356404		Mlxip	0.631541	0
Pde1c	9.81121e-27	1.59004	0.063	0.015	1.93938e-22		Sertad3	1.11536e-07	0.899319	0.044	0.025	0.00220474		Pfkfb3	0.628244	0
Slc20a1	0.687221	1.58089	0.017	0.006	1		Ccl2	3.2184e-05	0.897113	0.045	0.03	0.636182		Ppm1g	0.62646	0
Fbxw5	0.039928	1.57873	0.035	0.009	1		Flrt1	0.00571202	0.896637	0.014	0.008	1		Ube2g1	0.623036	0
Inpp4b	2.8483e-63	1.57748	0.27	0.084	5.63024e-59		Kcnrg	2.46932e-13	0.895815	0.058	0.029	4.88111e-09		Metap1d	0.622541	0
Dcun1d2	6.01339e-07	1.56877	0.059	0.019	0.0118867		Mfap2	6.73159e-07	0.894414	0.024	0.012	0.0133063		Adamts6	0.620551	0
Pik3cb	0.0241994	1.56265	0.015	0.006	1		Rbm4b	3.24863e-27	0.893542	0.139	0.076	6.42156e-23		Pik3ip1	0.619549	0
Adgrl2	4.99788e-11	1.55292	0.066	0.016	9.87931e-07		Rspo1	0.063057	0.892696	0.011	0.008	1		Ilf3	0.615497	0
Osbpl6	0.020677	1.55115	0.013	0.002	1		Dusp23	4.5183e-07	0.892274	0.035	0.019	0.00893132		Chchd3	0.614222	0
Akap1	0.613976	1.5467	0.026	0.006	1		Nr4a2	1.56031e-12	0.890437	0.073	0.042	3.08426e-08		Itgbl1	0.612463	0
Zscan2	0.00928409	1.53958	0.014	0.004	1		Polr2k	1.20678e-05	0.888289	0.031	0.018	0.238545		Mfap4	0.612137	0.960309
Rph3al	0.017361	1.53626	0.013	0.007	1		Srp14	1.19519e-07	0.88643	0.048	0.029	0.00236253		Mafk	0.610899	0
Thsd4	0.00510899	1.53382	0.022	0.005	1		Proca1	5.78016e-05	0.886396	0.026	0.015	1		Ccnd3	0.610383	0
Mitf	5.15557e-06	1.52443	0.085	0.027	0.10191		Cstb	0.00587364	0.885521	0.013	0.008	1		Adap2	0.610028	-0.276006
Dhtkd1	0.0114538	1.52333	0.018	0.005	1		Eid1	1.23293e-09	0.8847	0.045	0.024	2.43714e-05		Mef2d	0.60693	0
Lrrc1	0.158534	1.52092	0.025	0.01	1		Dlgap1	0.0139483	0.883713	0.027	0.02	1		Hacd3	0.604976	0
Tsc22d3	9.68489e-42	1.5104	0.152	0.051	1.91441e-37		Il17rb	0.00106441	0.88174	0.011	0.005	1		Adamtsl2	0.604186	0
Vps37b	0.066475	1.50422	0.016	0.006	1		Syn3	6.11874e-23	0.879566	0.189	0.123	1.20949e-18		Itga5	0.60299	0.353234
Kcnma1	0.00274723	1.48768	0.018	0.009	1		Tm2d2	1.681e-05	0.878672	0.026	0.015	0.332282		Srsf6	0.602262	0
Tspan4	1.01259e-33	1.47696	0.11	0.035	2.00158e-29		Chac2	3.46991e-11	0.878417	0.054	0.029	6.85898e-07		Sec14l1	0.600083	0
Adam33	0.00186951	1.46153	0.011	0.004	1		Otud1	1.11677e-07	0.876105	0.034	0.018	0.00220753		Stk32b	0.599715	0
Hes6	0.0276096	1.45372	0.015	0.004	1		Tagln	0.0193275	0.876096	0.01	0.006	1		Slc25a51	0.596578	0
Prrt4	0.000168321	1.44799	0.017	0.006	1		Ier3	1.23944e-16	0.874079	0.138	0.089	2.45e-12		Ppp1r18	0.594881	0
Idua	0.0911127	1.44641	0.021	0.008	1		Slc24a5	1.1923e-16	0.871935	0.078	0.041	2.35682e-12		Nr4a3	0.594105	0.605476
Rnasel	0.00874915	1.4444	0.017	0.007	1		Rpl39	1.34278e-09	0.870252	0.066	0.041	2.65427e-05		Coq10b	0.593778	0.820283
Sox4	0.154876	1.43788	0.017	0.007	1		Masp2	0.0300465	0.868394	0.01	0.007	1		Abcf1	0.593511	0
Bhlhe41	3.01441e-30	1.43743	0.089	0.024	5.95858e-26		Lrrc14	9.88998e-09	0.862661	0.057	0.034	0.000195495		Bhlhe40	0.589237	0.333566
Hmg20b	0.00244936	1.43679	0.045	0.017	1		Ndufaf3	0.00487265	0.862582	0.014	0.008	1		Eps8l1	0.586937	0
Tmem44	0.00195438	1.43575	0.013	0.005	1		Mrpl40	5.43928e-07	0.861351	0.034	0.019	0.0107518		Nr1d1	0.586703	0.365651
Psme1	0.142831	1.43175	0.025	0.007	1		Cyp2r1	0.0106913	0.858923	0.016	0.01	1		Csrp2	0.586652	0.75557
Npff	0.00011383	1.42194	0.018	0.006	1		Ndufc1	9.83147e-07	0.858624	0.044	0.027	0.0194339		Boc	0.582541	0
Qk	1.69038e-71	1.41876	0.354	0.117	3.34137e-67		Kif24	7.31988e-06	0.854783	0.034	0.02	0.144692		Anxa11	0.576382	0
Uba52	0.000111033	1.41822	0.026	0.007	1		Cd27	0.00120648	0.853184	0.023	0.014	1		Prkd1	0.57509	0
Dennd4b	0.0792193	1.41584	0.022	0.01	1		Col12a1	0.0677401	0.852562	0.01	0.007	1		Ppfia1	0.575014	0
Lypd1	0.0188371	1.39652	0.01	0.004	1		Tro	0.00151083	0.852514	0.014	0.008	1		Frmd4b	0.569542	0
Pkm	0.130119	1.39076	0.045	0.018	1		Sat1	1.95693e-40	0.851977	0.428	0.317	3.86827e-36		Gnb2	0.566775	0
Ints10	5.18165e-05	1.38803	0.057	0.015	1		Pdzd11	6.04482e-06	0.851551	0.032	0.018	0.119488		Zswim6	0.566371	0
Tysnd1	0.385807	1.38496	0.013	0.006	1		Krt10	0.00590124	0.850512	0.013	0.007	1		Npr2	0.563412	0
Nkain3	6.57618e-29	1.38378	0.102	0.037	1.29991e-24		Crlf2	0.000518099	0.849562	0.019	0.011	1		Lrrc8c	0.563327	0
Slc35a4	0.00188431	1.38347	0.015	0.005	1		Nfkbie	0.00145585	0.845126	0.011	0.005	1		Flrt2	0.560492	0.321737
Rab24	0.000296614	1.37562	0.054	0.015	1		Dynlt1b	6.11713e-05	0.844851	0.027	0.016	1		Bcl7b	0.557334	0
Scarb1	0.0479166	1.37185	0.014	0.006	1		Dnah17	0.00206649	0.843917	0.011	0.006	1		Sidt2	0.556607	0
Ptges2	0.152105	1.36948	0.011	0.003	1		Zfp30	3.4378e-06	0.843097	0.046	0.03	0.0679549		Slc44a2	0.555477	0
Chaf1a	0.00653348	1.36856	0.01	0.004	1		Nprl2	0.000405854	0.842641	0.018	0.01	1		Phactr4	0.554551	0
Dsn1	0.000287627	1.36477	0.012	0.004	1		Cbr1	0.000446874	0.838439	0.016	0.008	1		Snrk	0.553784	-0.275566
Slc6a6	3.97277e-41	1.36222	0.126	0.043	7.85298e-37		Bola1	5.67796e-05	0.837517	0.018	0.009	1		Prex1	0.550242	0
Inpp5e	0.000882461	1.35431	0.021	0.007	1		Catip	0.00282046	0.836645	0.011	0.006	1		Tbx20	0.548806	0.437749
Adam22	0.0152506	1.34575	0.024	0.006	1		Sft2d3	2.51804e-09	0.833439	0.051	0.029	4.97741e-05		Nup50	0.546477	0
Ncln	0.0145654	1.34521	0.036	0.012	1		Tmsb10	5.0048e-17	0.832938	0.104	0.06	9.89299e-13		Synj2	0.546349	0
Slc25a20	0.00846171	1.34345	0.023	0.007	1		Fam189b	8.70413e-08	0.832399	0.032	0.016	0.00172055		Klf9	0.544299	-0.3077
Lyz2	0.114391	1.34219	0.01	0.007	1		Sdhaf1	0.00770713	0.831645	0.016	0.01	1		Jdp2	0.541305	0
Dnaaf2	0.00652034	1.32468	0.01	0.003	1		Zfp385c	0.00313087	0.830164	0.018	0.011	1		Pla1a	0.54052	0.297271
Slc28a1	0.00284944	1.32144	0.011	0.003	1		Rpl36	2.41691e-17	0.829999	0.13	0.081	4.7775e-13		Pnn	0.539074	0
Wee1	5.73405e-20	1.31718	0.058	0.02	1.13345e-15		Jtb	5.89616e-15	0.827688	0.081	0.045	1.16549e-10		Sh2b3	0.53817	0
Pitpnc1	3.0459e-05	1.31361	0.043	0.012	0.602083		Hirip3	6.30331e-06	0.826769	0.031	0.018	0.124598		Ctnna1	0.538167	0
Cisd3	0.424832	1.30769	0.013	0.004	1		Iscu	4.19009e-07	0.826537	0.04	0.023	0.00828256		Zfp592	0.536985	0
Ctsd	1.07538e-06	1.30357	0.041	0.015	0.0212571		Gstp1	0.000322502	0.825502	0.019	0.011	1		Naa60	0.536406	0
Eif2s3y	3.46314e-19	1.30336	0.098	0.039	6.84559e-15		Mrps16	3.33626e-05	0.824158	0.028	0.016	0.659479		Azin1	0.534443	0
Aif1l	0.000109812	1.30055	0.012	0.005	1		Txndc17	9.42751e-05	0.823147	0.029	0.018	1		Orai1	0.5332	0
Gtpbp3	0.00234739	1.29932	0.034	0.01	1		Sat2	3.87594e-07	0.822806	0.036	0.02	0.00766158		Rcsd1	0.532826	0
Surf2	0.06206	1.29342	0.012	0.004	1		Uba52	3.77602e-07	0.821978	0.047	0.029	0.00746405		Cers2	0.532067	0
Lgmn	0.0129155	1.29268	0.013	0.006	1		Pgp	4.60999e-06	0.821418	0.029	0.016	0.0911257		Otud4	0.524553	0
Guca1b	0.0418041	1.28862	0.012	0.004	1		Nusap1	0.00684913	0.820636	0.014	0.008	1		Vav2	0.524043	0
Tmem246	0.182169	1.28439	0.012	0.004	1		Coq10b	4.11512e-56	0.820283	0.352	0.221	8.13435e-52		Anapc16	0.523933	0
Mcf2l	0.000284402	1.28083	0.01	0.003	1		H2afj	1.45415e-16	0.817199	0.088	0.048	2.87443e-12		Mfap5	0.523316	0.488701
Cnst	3.94405e-08	1.26926	0.061	0.017	0.000779619		Id3	3.76667e-33	0.815067	0.287	0.194	7.44558e-29		Prkcz	0.522857	0
Ppp1r12b	3.2586e-44	1.26884	0.24	0.08	6.44127e-40		Fam161b	0.0647449	0.814563	0.01	0.007	1		Sipa1l1	0.521072	0
Zc3h11a	4.19108e-08	1.26821	0.03	0.011	0.000828451		Tmem208	4.89108e-20	0.813238	0.133	0.08	9.6682e-16		Pxn	0.518064	0
Ccdc85c	0.00133244	1.26006	0.011	0.002	1		Ackr4	3.26052e-13	0.806846	0.075	0.042	6.44506e-09		Ankrd6	0.512575	0
Tmem129	0.00571045	1.25794	0.01	0.003	1		Atp5o	1.07814e-42	0.802217	0.266	0.16	2.13115e-38		Ppia	0.512235	0
Plekhm2	8.39557e-16	1.25613	0.14	0.053	1.65955e-11		Gspt2	0.00070215	0.802192	0.023	0.014	1		Cmtm7	0.512078	0
Bbox1	3.31964e-05	1.25535	0.019	0.008	0.656193		Mrpl43	2.31169e-06	0.801949	0.031	0.017	0.0456952		Nrbp1	0.5108	0
Eno1	0.000733882	1.25425	0.02	0.007	1		Ccdc73	2.44219e-09	0.801878	0.049	0.027	4.82748e-05		Ddx5	0.510038	0.327741
Grm8	5.73735e-23	1.23592	0.113	0.052	1.1341e-18		Tuba1a	2.23864e-20	0.801844	0.158	0.1	4.42512e-16		Angptl2	0.509925	0
Hhipl1	4.99924e-53	1.23444	0.192	0.074	9.88199e-49		Aldh1a2	3.27757e-16	0.80166	0.09	0.05	6.47877e-12		Fam129b	0.508837	0
Dot1l	7.10179e-05	1.232	0.043	0.01	1		Tspyl4	5.81218e-07	0.800045	0.038	0.022	0.0114889		Il33	0.507335	0
Inip	0.00826376	1.23025	0.027	0.009	1		Psip1	1.12604e-31	0.79853	0.215	0.133	2.22584e-27		Ankrd12	0.505685	0.217252
Oas2	0.44222	1.22342	0.011	0.005	1		Lsm7	7.83325e-07	0.797776	0.038	0.022	0.015484		Uty	0.505083	0
Ctsa	3.38303e-05	1.22096	0.028	0.008	0.668723		Kcnn3	2.78984e-15	0.796532	0.066	0.033	5.51468e-11		Nudt21	0.504694	0
Ndufa6	0.838714	1.22032	0.033	0.012	1		Iah1	2.34155e-21	0.795993	0.139	0.083	4.62854e-17		Jup	0.504558	0
Pgpep1l	8.78056e-12	1.21814	0.048	0.021	1.73565e-07		Mad2l1bp	0.00260631	0.792149	0.012	0.006	1		Tle3	0.502727	0
Gfra2	2.37727e-08	1.21766	0.026	0.008	0.000469916		Dpp4	4.99812e-08	0.790435	0.046	0.026	0.000987979		Brd9	0.500287	0
Def8	0.000759024	1.21635	0.018	0.006	1		B3gnt8	3.93029e-05	0.78987	0.02	0.01	0.776901		Actn4	0.500118	0
Ndufa3	0.251797	1.21628	0.025	0.014	1		Med11	0.000955034	0.789354	0.013	0.006	1		Rpl10a	0.495605	0.507654
Slc27a6	1.16437e-08	1.21346	0.024	0.008	0.00023016		Prorsd1	8.8582e-06	0.788384	0.035	0.021	0.1751		Adcy7	0.492816	0
Unc13c	1.30641e-07	1.21081	0.02	0.006	0.00258238		Poc1a	0.00748192	0.788304	0.013	0.008	1		Mbd1	0.490367	0
Tjp2	0.000115575	1.20912	0.026	0.009	1		Fosl1	0.000231785	0.787367	0.028	0.017	1		Eef2k	0.489693	0
Flt1	0.00415824	1.2084	0.011	0.003	1		Rpl29	2.11855e-07	0.787048	0.04	0.023	0.00418774		Mfhas1	0.489027	0
Rnaset2b	0.00139854	1.20489	0.013	0.004	1		Urod	0.142307	0.784782	0.013	0.01	1		Ahnak2	0.489005	0.574543
Thsd7b	1.17545e-08	1.20159	0.047	0.022	0.000232352		Mbd3	3.40603e-05	0.78296	0.04	0.026	0.67327		Atl2	0.48627	0
Phkg1	2.61519e-08	1.19309	0.021	0.007	0.000516945		Leng1	3.73037e-05	0.782845	0.037	0.024	0.737383		Hnrnpdl	0.485507	0.427469
Gtpbp2	1.40427e-13	1.19128	0.117	0.044	2.77583e-09		Hspb1	1.27817e-15	0.779422	0.086	0.048	2.52655e-11		Zfp653	0.485145	0
Chpt1	3.78479e-11	1.19012	0.058	0.021	7.4814e-07		Sf3b5	0.000145318	0.778057	0.025	0.015	1		Kmt2d	0.483428	0
Fastk	0.02261	1.18476	0.046	0.015	1		Prg4	0.00135544	0.777613	0.03	0.02	1		Il15ra	0.482351	0
Aspn	8.75193e-54	1.18401	0.232	0.103	1.72999e-49		Cntnap2	0.017208	0.774871	0.011	0.007	1		Pabpc1	0.48067	0
Trib2	7.17444e-07	1.17598	0.036	0.011	0.0141817		Mrpl4	1.24454e-09	0.774861	0.067	0.041	2.46009e-05		Podn	0.479082	0
Ifngr2	0.17895	1.1568	0.042	0.018	1		Zfp54	0.00126618	0.774502	0.018	0.011	1		Hnrnpl	0.478843	0
Acyp2	2.07274e-36	1.15247	0.302	0.119	4.09718e-32		Agrp	7.83622e-18	0.774318	0.111	0.064	1.54899e-13		Adgre5	0.478705	0.418438
Map3k11	0.053147	1.15063	0.015	0.006	1		Baiap2l1	2.12994e-16	0.773641	0.087	0.048	4.21026e-12		Myh9	0.478577	0
Fam53b	4.92563e-05	1.14819	0.031	0.01	0.97365		Rpp38	0.00521401	0.773243	0.014	0.009	1		Tmtc1	0.478507	-0.321803
Tsnax	0.000119625	1.14563	0.065	0.025	1		Rtn2	0.0335317	0.772598	0.01	0.006	1		Fgfr2	0.477987	0.73469
Exoc6	0.0891397	1.14539	0.016	0.008	1		Yif1a	0.05195	0.772233	0.011	0.008	1		Pdlim7	0.477764	0
Crybb3	0.0190461	1.14406	0.013	0.006	1		Slc16a4	2.89746e-07	0.77111	0.038	0.021	0.0057274		Cnn3	0.47741	0
Pde7a	1.42773e-14	1.13947	0.123	0.044	2.82218e-10		Nt5c	1.28403e-06	0.77009	0.039	0.023	0.0253815		Lgi4	0.476792	0
Gys1	0.0671949	1.1387	0.028	0.01	1		BC003965	6.80917e-10	0.769091	0.068	0.041	1.34597e-05		Fat1	0.476186	0
Ackr4	1.04594e-24	1.13541	0.111	0.043	2.06752e-20		Edf1	0.00063072	0.769089	0.027	0.018	1		Clk1	0.475035	0
Smpd2	0.0105047	1.13515	0.022	0.008	1		Krtcap2	6.28288e-07	0.768763	0.049	0.031	0.0124194		Tns2	0.47267	0
Ampd3	0.146512	1.12691	0.023	0.009	1		Tll2	2.81796e-26	0.768313	0.198	0.124	5.57026e-22		Gas6	0.472203	0
Mrps11	0.00401133	1.1268	0.022	0.009	1		Crip1	5.78798e-20	0.76747	0.168	0.109	1.14411e-15		Synj2bp	0.471672	0
Acad11	8.78675e-08	1.12417	0.046	0.016	0.00173688		Trp53rkb	0.00226854	0.767321	0.02	0.013	1		Stk39	0.469269	0
Cobll1	9.12669e-09	1.12223	0.012	0.004	0.000180407		Camk1	4.44303e-20	0.766981	0.132	0.078	8.78255e-16		Lrch1	0.461341	0
Ccnd1	5.17108e-14	1.1164	0.078	0.036	1.02217e-09		Irf3	1.13523e-21	0.766772	0.159	0.099	2.24401e-17		Slco3a1	0.459614	0
Grin3a	8.907e-08	1.11588	0.022	0.008	0.00176065		Rita1	0.000608585	0.764928	0.016	0.009	1		Apba2	0.458941	0
Tmem50b	0.109137	1.11174	0.013	0.006	1		Ccl21a	3.27313e-05	0.763556	0.018	0.009	0.647		Eva1b	0.458004	1.15648
Zfp513	0.00019012	1.1113	0.024	0.01	1		Fahd1	0.00775359	0.761819	0.014	0.009	1		Pdxk	0.457614	0
Nbl1	1.218e-06	1.10731	0.037	0.015	0.0240762		Dnajc9	0.00711048	0.761034	0.011	0.007	1		Spta1	0.45752	0
Nlrc3	0.0615665	1.10591	0.01	0.004	1		Usp50	1.4902e-16	0.759559	0.13	0.082	2.94567e-12		Hecw1	0.457482	0
Ppp1r14b	0.00726415	1.10002	0.018	0.008	1		Kcnma1	0.000223292	0.759038	0.017	0.009	1		Klhl18	0.457344	0
Gdf6	7.19061e-07	1.09938	0.017	0.006	0.0142137		Mageh1	0.00315287	0.757584	0.011	0.006	1		Midn	0.455864	0
Lsm5	0.00341304	1.09894	0.017	0.007	1		Sh3gl1	1.08142e-22	0.757575	0.183	0.117	2.13764e-18		Tfdp2	0.453899	0
Tmem251	0.0175396	1.09502	0.011	0.004	1		Csrp2	1.77105e-07	0.75557	0.068	0.045	0.00350083		Dync1li1	0.452783	0
Wdr17	0.00460191	1.09391	0.019	0.008	1		Sertad1	5.6189e-06	0.754491	0.039	0.024	0.111069		Adarb1	0.452509	-0.35972
Egfl8	0.00781777	1.09277	0.012	0.005	1		Dnah8	0.0825817	0.754096	0.01	0.007	1		S100a10	0.449782	0
Prkab1	0.0463949	1.08916	0.019	0.009	1		Spats1	0.00526324	0.753427	0.014	0.009	1		Slc43a3	0.447302	0
Pltp	6.30685e-10	1.08489	0.064	0.026	1.24667e-05		Ifitm2	5.62837e-09	0.752415	0.075	0.048	0.000111256		Tfeb	0.445762	0
Apba3	9.88803e-05	1.0793	0.027	0.008	1		Nkain1	0.00130921	0.75129	0.016	0.009	1		Dbn1	0.444954	0
Zfp772	0.0211767	1.07876	0.011	0.005	1		Inafm2	0.00172173	0.750559	0.019	0.011	1		Rsad1	0.44371	0
Rmi1	0.0457828	1.07841	0.019	0.007	1		Ndufa13	2.18151e-10	0.750156	0.068	0.04	4.31218e-06		Smurf1	0.442192	0
Bak1	0.00372339	1.07832	0.018	0.005	1		Mphosph10	9.90929e-05	0.748484	0.046	0.032	1		Ldb1	0.440478	0
Hacd4	0.0410995	1.07721	0.019	0.011	1		Prdm6	0.00383892	0.748026	0.012	0.006	1		Stx4a	0.439488	0
S100a1	0.559236	1.07636	0.027	0.016	1		Xrcc6	5.92322e-10	0.747508	0.089	0.059	1.17084e-05		Tom1	0.438101	0
Mrpl50	0.291266	1.0722	0.014	0.007	1		Epha1	0.00312711	0.746263	0.016	0.01	1		Phldb1	0.436774	0
Ppip5k1	4.92378e-06	1.07116	0.073	0.031	0.0973283		Trappc4	1.33931e-07	0.74563	0.049	0.029	0.00264742		Twist2	0.436001	0
Polr3h	9.43624e-05	1.06988	0.026	0.007	1		Psat1	0.0209717	0.745439	0.01	0.006	1		Myo1c	0.435464	0
Kctd1	0.0639648	1.06885	0.032	0.014	1		Tspan17	1.83301e-07	0.744357	0.047	0.028	0.0036233		Gprc5b	0.43415	0
Ackr2	0.00216856	1.06806	0.014	0.007	1		Tslp	7.91118e-09	0.742399	0.068	0.043	0.00015638		Zfp710	0.433132	0
Grm7	1.81934e-08	1.06547	0.04	0.018	0.000359629		Tcta	7.67067e-12	0.742128	0.061	0.033	1.51626e-07		Nedd4l	0.43123	0
Polr3g	0.0260676	1.06304	0.01	0.005	1		Gps1	3.43457e-06	0.741511	0.041	0.025	0.0678911		Col8a1	0.431014	-0.179661
Adgrf5	0.000429205	1.05705	0.012	0.005	1		Cd151	4.19433e-07	0.741034	0.056	0.036	0.00829093		Rhot1	0.429362	0
Krtcap3	0.0510392	1.05682	0.011	0.003	1		Mtx1	9.2698e-07	0.739192	0.045	0.027	0.0183236		Cyp39a1	0.428895	0
Pcnt	2.01846e-07	1.05553	0.049	0.025	0.0039899		Tmem126a	2.1058e-19	0.737346	0.139	0.085	4.16253e-15		Plekhg2	0.428741	0
Trak2	4.66389e-05	1.05122	0.1	0.04	0.921912		Vash2	0.0338018	0.736658	0.01	0.006	1		Piezo1	0.42738	0
Tef	5.13962e-86	1.04855	0.356	0.164	1.01595e-81		Shisa4	0.000391447	0.736567	0.022	0.013	1		Plcl1	0.426483	-0.209791
Tpst2	7.95792e-06	1.04763	0.057	0.027	0.157304		Ttc39a	0.0161971	0.736023	0.011	0.007	1		Per2	0.424925	0
Entpd5	0.0324172	1.04561	0.029	0.012	1		Rpl10	7.80899e-20	0.735524	0.162	0.104	1.5436e-15		Nptn	0.424881	0
Col8a2	0.00382694	1.04545	0.01	0.005	1		Atg4d	4.47258e-10	0.73544	0.077	0.048	8.84096e-06		Psmd4	0.42372	0
Ap1b1	0.00719413	1.0444	0.024	0.011	1		Nkain3	2.67105e-07	0.735222	0.035	0.019	0.00527986		Znrf1	0.421653	0
Rnf126	0.00198356	1.04241	0.034	0.012	1		Lage3	1.71683e-08	0.734964	0.054	0.033	0.000339366		Nfix	0.421443	-0.207083
Cdk18	1.5284e-06	1.03816	0.021	0.007	0.0302118		Etnk2	4.9229e-07	0.734757	0.038	0.022	0.0097311		Notch3	0.421138	-0.383678
Errfi1	1.79539e-33	1.03626	0.24	0.134	3.54895e-29		Fgfr2	2.55444e-72	0.73469	0.503	0.349	5.04937e-68		Aco1	0.420878	0
Klhl29	1.2688e-36	1.03557	0.182	0.083	2.50804e-32		Kbtbd4	0.00685439	0.734282	0.019	0.012	1		Rhbdf1	0.420483	0.479204
Haus5	0.00237541	1.0347	0.022	0.009	1		Cggbp1	6.07491e-11	0.732249	0.086	0.054	1.20083e-06		Dock6	0.419912	0
Impa2	0.594666	1.0327	0.011	0.004	1		B3gnt9	1.56261e-06	0.731737	0.037	0.022	0.0308882		Smim14	0.419631	0
Tmem11	0.00485908	1.02741	0.038	0.018	1		Polr1c	0.000345295	0.731675	0.031	0.02	1		Fbln2	0.419238	0
Tyw3	0.00234322	1.02629	0.015	0.006	1		Rpain	1.19342e-05	0.730453	0.037	0.022	0.235902		Fbxw7	0.415277	0
Acta1	5.9273e-55	1.0253	0.084	0.037	1.17165e-50		Zfp511	1.20581e-06	0.730383	0.035	0.02	0.0238353		Lrrfip2	0.414098	0
Nostrin	0.000282607	1.0205	0.014	0.006	1		Zfp329	1.17037e-23	0.730367	0.168	0.103	2.31347e-19		Samd4	0.413866	-0.193381
Plk3	0.000202217	1.02045	0.018	0.008	1		Mrpl54	0.0011959	0.730115	0.022	0.014	1		Rbpj	0.413754	0
Zfp697	1.56242e-14	1.01673	0.048	0.02	3.08843e-10		AU041133	5.44148e-05	0.729144	0.036	0.023	1		Trim11	0.413634	0
Pradc1	0.303915	1.01604	0.012	0.004	1		Hs6st2	2.41795e-06	0.728556	0.048	0.031	0.0477956		Ankrd16	0.41349	0
Lpin1	0.872309	1.01504	0.01	0.005	1		Zfp414	0.000229119	0.727739	0.03	0.019	1		Taf1d	0.412707	0.620059
Dus1l	0.0302022	1.01221	0.026	0.013	1		Hypk	1.81982e-10	0.727374	0.076	0.047	3.59724e-06		Tns1	0.411875	-0.224488
Bcl2l1	1.49959e-59	1.01152	0.314	0.154	2.96424e-55		Polr3k	0.0548953	0.727207	0.017	0.012	1		Pdzd2	0.411325	0
Prg4	0.00103576	1.01125	0.014	0.006	1		Fosb	1.19479e-18	0.725388	0.171	0.113	2.36173e-14		Ralb	0.411309	0
Shb	1.69821e-12	1.01109	0.076	0.032	3.35686e-08		Mus81	4.25693e-10	0.725293	0.071	0.043	8.41468e-06		Sox13	0.411268	0
Tbx6	4.87019e-06	1.01081	0.031	0.016	0.096269		Prrt4	0.0350119	0.725014	0.016	0.011	1		Smarcd2	0.411002	0
Gpr39	1.06789e-24	1.01023	0.132	0.064	2.1109e-20		Vcam1	2.49266e-10	0.724891	0.151	0.111	4.92723e-06		Hes1	0.409424	0.60847
Tmem200a	2.42869e-08	1.00883	0.031	0.012	0.000480078		Irf7	0.00456855	0.724818	0.02	0.013	1		Narf	0.409418	0
Mthfd1l	2.48522e-28	1.00796	0.115	0.048	4.91254e-24		Cryab	3.278e-16	0.723687	0.121	0.074	6.47963e-12		Hoga1	0.406939	0
Nthl1	0.282888	1.00781	0.012	0.005	1		Fst	0.0239107	0.72223	0.013	0.009	1		Ppl	0.405154	0
Ano8	9.11196e-05	1.00405	0.032	0.012	1		Commd3	7.84568e-13	0.720653	0.084	0.05	1.55085e-08		Ilk	0.403577	0.372906
Nudt4	0.0336742	1.00364	0.02	0.009	1		Zfand2b	3.37329e-05	0.719251	0.033	0.02	0.666798		Nppa	0.403026	0
Rpl29	0.0553055	1.00132	0.011	0.008	1		Dnajc30	0.0551559	0.719242	0.016	0.012	1		Gsta3	0.402898	0
Glo1	0.00218561	0.998952	0.044	0.017	1		Hccs	6.09957e-13	0.716377	0.073	0.041	1.2057e-08		Rnf146	0.402841	0
Tspan7	1.57606e-06	0.998544	0.025	0.009	0.0311539		Kctd15	6.33268e-05	0.7162	0.031	0.019	1		Gstt2	0.402813	0.606411
Sntb1	1.13835e-05	0.996703	0.049	0.027	0.225017		Ldlr	1.02266e-08	0.715763	0.056	0.033	0.00020215		Map3k10	0.400538	0
Cited2	0.503395	0.995195	0.023	0.01	1		Fth1	5.68709e-23	0.714513	0.187	0.12	1.12417e-18		Dnm1	0.399625	0
Lmf2	3.74069e-05	0.989176	0.03	0.012	0.739421		Ang	0.0460781	0.714112	0.017	0.012	1		Grasp	0.398773	0
Lmnb2	0.0300226	0.988229	0.011	0.004	1		Papln	1.40772e-08	0.713976	0.044	0.024	0.000278264		Tulp3	0.39874	0
Rdh11	0.00184814	0.987793	0.021	0.009	1		Manf	4.85651e-13	0.713204	0.116	0.076	9.59987e-09		Eif4a2	0.398598	0
Fmo2	8.27308e-48	0.984742	0.285	0.149	1.63534e-43		Rilpl2	2.94304e-05	0.712677	0.042	0.028	0.581751		Qsox1	0.397775	0
Glmp	0.140987	0.981591	0.018	0.008	1		Med22	0.0070716	0.711411	0.014	0.009	1		Pcgf5	0.396846	0
Etl4	1.60684e-07	0.981459	0.026	0.009	0.00317625		Cklf	8.7112e-06	0.710752	0.041	0.026	0.172194		Terf2	0.39676	0
Tmem259	2.63806e-06	0.980823	0.082	0.032	0.0521465		Noc4l	0.013683	0.710683	0.011	0.007	1		Brap	0.396629	0
Lurap1	0.0236552	0.980314	0.013	0.005	1		Cenpp	5.40255e-21	0.710177	0.152	0.093	1.06792e-16		P2rx7	0.396465	0
Zfp346	2.61296e-24	0.978628	0.198	0.09	5.16503e-20		Gria4	0.00777319	0.709933	0.034	0.026	1		Mcl1	0.391961	0.626436
Crip2	0.375201	0.977506	0.043	0.028	1		Kmo	0.000505114	0.708243	0.015	0.008	1		Ppp2cb	0.388398	0
Arhgap29	0.0160968	0.973376	0.087	0.043	1		Gem	1.10311e-18	0.708196	0.305	0.234	2.18052e-14		Nkain2	0.387787	0
Pde4a	2.0612e-25	0.971691	0.165	0.073	4.07438e-21		Ggact	1.47193e-11	0.706741	0.098	0.063	2.90956e-07		Galnt16	0.387191	0
Rasgrp2	1.492e-05	0.970507	0.032	0.015	0.294924		Megf11	0.000950938	0.704491	0.013	0.006	1		Srsf3	0.386767	0
Zfp579	4.43024e-05	0.97014	0.039	0.02	0.875725		Rps19bp1	0.00256937	0.704308	0.016	0.009	1		Kcnip1	0.385859	0
Nnat	0.0946024	0.970092	0.016	0.006	1		Fam136a	0.00712182	0.703901	0.014	0.009	1		Hsd11b1	0.384399	0
Klhl33	0.340931	0.969284	0.022	0.009	1		Fbl	2.56425e-09	0.701725	0.074	0.047	5.06875e-05		Limk1	0.384042	0
Shank3	0.000826487	0.967363	0.011	0.005	1		Bcl10	3.62057e-10	0.700228	0.079	0.05	7.15678e-06		Atn1	0.383977	0
Per3	6.099e-56	0.964835	0.187	0.08	1.20559e-51		Gstt3	0.0234901	0.700138	0.015	0.01	1		Tmem245	0.383914	0
Cdca4	0.0340707	0.963699	0.011	0.005	1		Ebp	0.0650119	0.699757	0.012	0.009	1		Nalcn	0.383889	0
Kctd16	0.00584721	0.96265	0.026	0.014	1		Mrps7	4.7015e-06	0.699273	0.039	0.023	0.0929346		Pacs2	0.38375	0
Lamb3	0.000335166	0.960879	0.027	0.015	1		Clcn2	5.23854e-05	0.698598	0.027	0.016	1		Brd1	0.382913	0
Eif3g	0.00681607	0.9599	0.017	0.008	1		Trmt112	0.000184339	0.69794	0.023	0.013	1		Srsf5	0.380095	0
Plekha7	0.0851286	0.958486	0.011	0.005	1		Dnaja2	6.42329e-32	0.697622	0.233	0.146	1.26969e-27		Dip2b	0.37994	0
Syn3	1.26837e-28	0.958071	0.147	0.076	2.50718e-24		Ndufb2	2.89809e-07	0.696896	0.056	0.035	0.00572865		Vamp5	0.379263	0
Gemin2	2.395e-05	0.951222	0.031	0.013	0.473419		Rfk	0.0164756	0.696167	0.014	0.009	1		Stat6	0.379126	0
Itga3	0.042241	0.949978	0.012	0.005	1		Fchsd1	0.0125981	0.69409	0.017	0.012	1		Ppp1r12c	0.378956	0
Kif21b	0.00916689	0.9492	0.016	0.008	1		Adh1	0.00046184	0.693881	0.031	0.021	1		Fkbp5	0.378897	0
Rasl11b	0.0261518	0.948034	0.011	0.004	1		Atat1	1.30418e-07	0.693371	0.055	0.035	0.00257798		Zkscan3	0.378774	0
Saxo1	0.0258015	0.947541	0.01	0.005	1		Pdcd5	1.60118e-08	0.692897	0.055	0.033	0.000316505		Agpat3	0.376961	0
Dnase2a	0.0206279	0.945106	0.017	0.007	1		Leng9	4.9699e-07	0.692878	0.042	0.025	0.00982401		Tbcel	0.375309	0
Lrrc20	0.0200408	0.942411	0.033	0.015	1		Cyp51	0.00911846	0.692755	0.016	0.01	1		Pdlim1	0.375221	0
Pank4	0.0553337	0.942274	0.032	0.016	1		Nudt2	0.0108321	0.692387	0.015	0.01	1		Pcsk6	0.374285	0
Atp8a1	0.429444	0.941693	0.013	0.005	1		Dbi	1.96532e-05	0.69193	0.03	0.018	0.388486		Rcor3	0.37315	0
Iqsec1	2.50527e-15	0.936159	0.115	0.049	4.95216e-11		Gcnt7	7.66853e-05	0.691019	0.047	0.033	1		Fndc1	0.372724	0.286399
Rab3c	0.000280982	0.935828	0.015	0.006	1		Pnmal2	0.0189941	0.689765	0.02	0.014	1		Mxra7	0.37177	0
Pex16	0.00263679	0.9355	0.021	0.009	1		Pkd1l3	0.0230836	0.689689	0.011	0.007	1		Rab30	0.371557	0.410002
Rras	7.49565e-07	0.935303	0.04	0.017	0.0148166		Ecscr	0.000115924	0.687688	0.026	0.016	1		Elk3	0.370191	0
Lamb2	1.65446e-07	0.93447	0.088	0.035	0.00327036		Echdc1	5.43406e-10	0.687609	0.074	0.046	1.07415e-05		Ccl25	0.370181	0
Myl6	5.30773e-26	0.933707	0.205	0.09	1.04918e-21		Nudt18	0.0900068	0.68746	0.011	0.007	1		Ddx18	0.369644	0.523875
Mical2	2.14226e-39	0.932197	0.247	0.126	4.2346e-35		Lamc3	0.00365994	0.687214	0.017	0.01	1		Epas1	0.367509	0
Cnksr3	3.97114e-12	0.931852	0.097	0.041	7.84975e-08		Mzf1	0.0423491	0.686756	0.011	0.007	1		Pacsin2	0.367001	0
Fabp4	8.28474e-33	0.929257	0.033	0.014	1.63764e-28		Mrps21	3.27281e-05	0.686569	0.051	0.035	0.646935		Cnppd1	0.366711	0
Gpr18	0.0793069	0.929252	0.019	0.006	1		Ppdpf	0.000800009	0.686016	0.023	0.014	1		Eif4e2	0.366602	0
Slc15a2	6.20064e-09	0.924829	0.025	0.007	0.000122568		Bcs1l	1.30451e-05	0.68533	0.031	0.018	0.257862		Safb	0.365118	0
Duox1	0.00151442	0.923858	0.029	0.017	1		Nup43	0.000209301	0.68441	0.022	0.013	1		Cers6	0.36349	0
Smad7	1.6714e-57	0.919908	0.308	0.152	3.30386e-53		Smim4	5.44479e-18	0.684287	0.139	0.087	1.07627e-13		Magi1	0.361079	-0.286319
Ubqln4	0.000384275	0.914553	0.035	0.014	1		Ebna1bp2	2.31409e-05	0.682994	0.041	0.026	0.457425		Zfp809	0.360181	0
Nubp2	0.025258	0.913555	0.011	0.006	1		Emp3	9.287e-07	0.68231	0.051	0.033	0.0183576		Tfcp2	0.35917	0
Slc20a2	0.000407069	0.91233	0.048	0.022	1		Tomm6	0.0306611	0.68177	0.013	0.009	1		Aldh2	0.358271	0
Rtn4rl2	0.000476937	0.907474	0.023	0.013	1		Ccdc107	1.32761e-05	0.681472	0.045	0.029	0.262428		Ppp2r5c	0.358086	0
Kdr	0.577097	0.907345	0.016	0.006	1		Cd180	0.00107252	0.678908	0.013	0.007	1		Pakap	0.35728	0
Hlf	4.56503e-70	0.906647	0.385	0.201	9.02369e-66		Agbl1	0.00610875	0.67885	0.015	0.009	1		Tnfrsf1b	0.357159	0
Smyd4	2.26001e-05	0.905805	0.031	0.013	0.446736		Dnttip2	1.1895e-05	0.67682	0.046	0.03	0.235128		Apbb2	0.355016	0
Appl2	5.88879e-07	0.904256	0.085	0.04	0.0116404		Asnsd1	0.00508301	0.676449	0.012	0.007	1		Arid5b	0.35444	0
Aldh3b1	0.0136475	0.903275	0.013	0.005	1		Cdkn2aip	7.86197e-08	0.67632	0.056	0.035	0.00155408		Whamm	0.35426	0
Txnrd3	0.0101677	0.901054	0.016	0.01	1		Hyls1	0.00102598	0.676214	0.016	0.009	1		Stx12	0.353824	0
Foxo4	0.00151938	0.898422	0.024	0.011	1		Hspe1	1.84902e-05	0.675643	0.04	0.026	0.365495		Dnmt3a	0.353514	0
Afg3l2	0.000861024	0.897906	0.042	0.018	1		Lgalsl	0.0169203	0.67553	0.02	0.014	1		Klhl6	0.352896	0
Aars2	0.0468377	0.896201	0.023	0.012	1		Gng5	2.0961e-08	0.674606	0.052	0.03	0.000414337		Dynlt1a	0.350461	0
Akt1s1	0.112712	0.896136	0.016	0.009	1		Lrrn4cl	0.00313849	0.674546	0.019	0.012	1		Dock10	0.350219	0
Clk3	3.41817e-05	0.895993	0.063	0.024	0.675669		Oaz1	2.97862e-23	0.673101	0.167	0.101	5.88783e-19		Skil	0.347764	0
Cd40	4.36767e-10	0.895861	0.067	0.034	8.63357e-06		Vegfb	1.7042e-06	0.671855	0.049	0.031	0.0336868		Il17rd	0.347236	0
Pcdh15	0.142474	0.89455	0.011	0.008	1		Rnf167	3.83359e-19	0.669759	0.155	0.098	7.57787e-15		Rere	0.345491	0
Col24a1	0.00145537	0.894299	0.011	0.005	1		Slc15a2	4.0741e-10	0.669282	0.038	0.018	8.05326e-06		Hnrnpul1	0.345309	0
Stk17b	0.000268719	0.89293	0.021	0.011	1		Gpx8	3.20448e-05	0.668404	0.032	0.02	0.633429		Actr3	0.344631	0
Csmd1	0.00716042	0.892535	0.034	0.02	1		Cnp	0.00227647	0.667454	0.017	0.01	1		Por	0.343338	0
Gzmm	0.243459	0.89189	0.01	0.005	1		Wdr66	4.43712e-30	0.66737	0.258	0.17	8.77085e-26		Arap1	0.343263	0
Exosc5	2.855e-05	0.888213	0.032	0.016	0.564348		Med31	0.000500815	0.665854	0.026	0.016	1		Abca6	0.343195	0
Acot7	3.87201e-06	0.886047	0.057	0.024	0.0765381		Smim1	0.000355417	0.665001	0.027	0.017	1		Dnm2	0.341884	0
Nmnat1	0.00845628	0.886014	0.021	0.007	1		Necap2	2.49033e-05	0.664857	0.046	0.031	0.492264		Safb2	0.341407	0
Nfkbil1	0.000257701	0.885183	0.027	0.011	1		Irf5	0.000124495	0.664468	0.028	0.017	1		Ltbp4	0.341324	0
Nmb	3.32338e-05	0.881791	0.028	0.011	0.656933		Pdlim2	2.13438e-06	0.663911	0.044	0.028	0.0421902		Ift140	0.341247	0
Egr1	4.67362e-18	0.878177	0.08	0.033	9.23834e-14		Thbs1	9.67755e-14	0.663488	0.294	0.239	1.91296e-09		Rras2	0.341217	0
Aatk	0.000305318	0.87762	0.012	0.006	1		Ate1	5.97294e-09	0.66339	0.092	0.063	0.000118067		Tead1	0.339858	0
Sult1a1	0.000132363	0.877223	0.011	0.007	1		Pus3	6.39179e-05	0.662886	0.031	0.019	1		Rab43	0.339142	0
Acer2	0.000192927	0.874787	0.021	0.009	1		Pla2g6	0.00535964	0.662057	0.029	0.021	1		Arglu1	0.339118	0.218126
Prr5l	0.00165656	0.871603	0.021	0.009	1		Prss36	0.00118132	0.660895	0.021	0.013	1		Smad6	0.338177	0
Dixdc1	0.0681497	0.870546	0.025	0.01	1		Tenm4	1.0389e-05	0.660849	0.029	0.016	0.205359		Col4a5	0.337599	0
Stc2	1.69515e-12	0.869219	0.067	0.028	3.35081e-08		Nudt6	0.00372129	0.660652	0.03	0.021	1		Crim1	0.337445	0
Clasp1	1.17779e-14	0.868685	0.19	0.079	2.32814e-10		Ankrd13d	0.0585314	0.660069	0.014	0.01	1		Dpep1	0.337273	0
Rbfox1	4.43266e-39	0.867271	0.307	0.136	8.76204e-35		Trim35	2.67004e-19	0.659335	0.192	0.131	5.27788e-15		Ranbp10	0.337239	0
Fmo1	6.06004e-29	0.86601	0.171	0.076	1.19789e-24		Cobl	4.06483e-05	0.659187	0.034	0.021	0.803496		Crkl	0.33665	0
Tsr2	0.0318258	0.865905	0.021	0.012	1		Ctbp2	6.93594e-13	0.65834	0.097	0.06	1.37103e-08		Dlst	0.33659	0
Cpeb2	0.00104188	0.864538	0.054	0.025	1		Epha3	1.40382e-06	0.658183	0.032	0.018	0.0277493		Ywhag	0.336196	0.459734
Fkbp3	1.33434e-05	0.862753	0.051	0.024	0.26376		Fos	3.45363e-27	0.657532	0.394	0.305	6.82679e-23		Abl1	0.332095	0
Arfrp1	0.017899	0.862031	0.044	0.021	1		Crebzf	1.6556e-33	0.656626	0.27	0.175	3.27263e-29		Fstl1	0.331303	0
AU041133	0.000122134	0.86125	0.027	0.011	1		Use1	2.49154e-10	0.656596	0.054	0.03	4.92503e-06		Plcb4	0.330563	0
Prkaca	0.000175032	0.860944	0.064	0.031	1		Knop1	1.76163e-12	0.655726	0.121	0.081	3.48221e-08		Prkca	0.33032	0
Ndufb4	0.338821	0.859979	0.023	0.011	1		Dnal4	0.0226172	0.654745	0.015	0.01	1		Gigyf1	0.330152	0
Napepld	0.0266128	0.859242	0.013	0.006	1		Ahsa1	0.000362456	0.654613	0.035	0.024	1		Cyth1	0.330136	0
Catip	0.0161488	0.858597	0.012	0.005	1		Pgam5	3.05851e-08	0.654237	0.058	0.036	0.000604575		Hira	0.329711	0
Tll2	1.08416e-19	0.858325	0.177	0.106	2.14305e-15		Fibp	3.29523e-08	0.653416	0.07	0.046	0.000651369		Gna14	0.329466	0
Tmem106b	0.00187937	0.856316	0.038	0.02	1		Lamb3	2.61543e-07	0.653375	0.048	0.029	0.00516992		Srpk1	0.328955	0
Pin4	0.0333869	0.855181	0.011	0.005	1		Zfpl1	9.2948e-05	0.65308	0.037	0.024	1		Eps15l1	0.328896	0
Tmem204	2.6689e-22	0.852662	0.166	0.083	5.27561e-18		Kcnip4	0.000353628	0.652427	0.017	0.01	1		Nr1h4	0.328246	0
Cyb561	3.47037e-12	0.850773	0.056	0.024	6.85988e-08		Prr5	7.12428e-05	0.652303	0.041	0.027	1		Sptbn1	0.32731	0
Map2k3	2.61125e-08	0.847626	0.073	0.034	0.000516167		Exosc8	0.000533035	0.651962	0.037	0.026	1		Limd1	0.327301	0
Cenpl	0.0973911	0.847025	0.01	0.006	1		Gnrh1	0.000462655	0.651749	0.019	0.011	1		Osbpl8	0.325378	0
Tacc3	0.0219927	0.844946	0.011	0.007	1		Ccrl2	0.157088	0.651008	0.011	0.009	1		Pls3	0.325091	0
Gba	0.00075784	0.844259	0.017	0.008	1		Espn	0.0148134	0.650803	0.013	0.008	1		Arhgef10l	0.324911	0
Ifrd1	1.78354e-13	0.843415	0.121	0.059	3.52553e-09		Qars	0.0099493	0.650697	0.029	0.021	1		Abca8b	0.324279	0
Timm50	0.766303	0.841281	0.014	0.008	1		Ftl1	9.8468e-12	0.650084	0.138	0.097	1.94642e-07		Rbm10	0.324193	0
Hsph1	1.92475e-09	0.841191	0.066	0.032	3.80466e-05		Rpl35	1.81025e-05	0.649352	0.041	0.026	0.357833		Stk25	0.323438	0
Fgf16	0.00196607	0.841114	0.01	0.003	1		Pdgfrl	7.30684e-10	0.648562	0.082	0.053	1.44434e-05		Fbxl20	0.320899	0
Lypla2	0.00122528	0.840685	0.022	0.01	1		Nol3	0.00557768	0.646272	0.01	0.005	1		Ahnak	0.320132	0
Cers4	0.0115452	0.840299	0.09	0.037	1		Ntan1	1.42433e-20	0.645857	0.187	0.124	2.81547e-16		Swap70	0.320101	0
Elac2	0.00717115	0.839954	0.026	0.014	1		Pja1	0.000303881	0.644398	0.046	0.033	1		Mphosph8	0.319624	0.337652
Elmod3	1.22469e-08	0.839272	0.06	0.026	0.000242085		Arl16	0.10061	0.644166	0.016	0.012	1		Kpna3	0.319377	0
Cdk2	0.00367575	0.836941	0.023	0.01	1		Rpl6	3.31625e-14	0.641535	0.124	0.08	6.55523e-10		Zcchc14	0.319357	0
Slc25a26	8.89535e-07	0.836455	0.054	0.024	0.0175834		Sfr1	2.76659e-09	0.641523	0.104	0.072	5.46871e-05		Gtf2i	0.319184	0
Pacrg	0.229702	0.83528	0.014	0.005	1		Mdp1	0.00170096	0.640433	0.036	0.026	1		Pdlim5	0.318802	0
Rps21	1.72563e-05	0.834657	0.06	0.028	0.341106		Rnf113a2	0.0167815	0.640223	0.012	0.007	1		Mertk	0.318346	0
Fam214b	5.7614e-05	0.833477	0.029	0.013	1		Zdhhc2	0.0147894	0.639224	0.022	0.016	1		Brd3	0.317846	0
Rreb1	9.83254e-21	0.833344	0.246	0.11	1.9436e-16		Prdx4	3.14295e-08	0.639027	0.073	0.048	0.000621267		Eml1	0.317833	0
Sema6b	0.157992	0.832749	0.01	0.005	1		Dtymk	1.28484e-10	0.638845	0.08	0.05	2.53974e-06		Myl12b	0.3178	0
Slk	5.64382e-08	0.832603	0.151	0.077	0.00111561		Chmp2a	0.000311548	0.638822	0.037	0.025	1		Tubgcp4	0.317358	0
Pptc7	0.00101332	0.832055	0.045	0.022	1		Per3	6.70728e-30	0.638592	0.322	0.231	1.32583e-25		Anxa2	0.317149	0.298163
Noa1	0.000441867	0.831492	0.02	0.011	1		S100a7a	0.00154579	0.63858	0.018	0.011	1		Gse1	0.314312	0
Cfl1	6.14383e-06	0.830528	0.049	0.024	0.121445		Metrnl	0.00409401	0.63825	0.023	0.015	1		Plekhg3	0.314139	0
Grsf1	0.602953	0.830054	0.013	0.009	1		Tmem186	0.002429	0.637998	0.02	0.013	1		Tlr4	0.312017	0
Cyb5r3	0.00531075	0.829511	0.017	0.01	1		Qpctl	0.00413296	0.636456	0.023	0.016	1		Ptgis	0.311935	0.154779
Maff	9.52954e-05	0.828385	0.021	0.009	1		Lhfpl3	0.181762	0.636395	0.014	0.011	1		Rassf8	0.310917	0
Cys1	1.78313e-37	0.826996	0.248	0.131	3.52472e-33		Fam53b	2.79117e-07	0.635745	0.056	0.035	0.00551731		Gabbr1	0.310288	0
Rapgef5	4.68175e-11	0.826133	0.094	0.057	9.25442e-07		Rpl22l1	3.11033e-10	0.635268	0.075	0.046	6.1482e-06		Map2	0.309624	-0.39886
Tpgs2	4.76007e-05	0.826062	0.026	0.013	0.940923		G0s2	4.7737e-13	0.63464	0.138	0.095	9.43617e-09		Lrrk1	0.308899	0
Ptpn14	1.6902e-07	0.825996	0.071	0.029	0.00334103		Ift27	0.000583704	0.634277	0.029	0.019	1		Axl	0.308374	0.17422
Serpini1	5.70893e-06	0.825604	0.018	0.011	0.112848		Uqcrfs1	1.98181e-06	0.634042	0.038	0.022	0.0391745		Txlna	0.307941	0
Dxo	0.00814713	0.822081	0.018	0.007	1		Shank1	0.0160639	0.634038	0.013	0.008	1		Luzp1	0.307697	0
Fam107b	0.157798	0.820616	0.017	0.012	1		Cdh11	4.63682e-06	0.63396	0.059	0.04	0.0916561		Tor1aip2	0.307053	0
Rps17	0.0740955	0.820513	0.031	0.017	1		Polr2i	2.1725e-05	0.63247	0.022	0.012	0.429437		Bach2	0.306151	-0.36178
Ddx3y	3.81038e-07	0.820479	0.074	0.042	0.00753199		Rab43	0.000184439	0.632201	0.037	0.025	1		Arhgap22	0.305076	0
Abhd11	0.00667733	0.820141	0.028	0.013	1		Tmed1	0.00170729	0.631676	0.023	0.014	1		Klf6	0.30449	0
Abcc10	0.170084	0.818301	0.017	0.009	1		Atxn7l3b	5.35719e-19	0.631475	0.133	0.081	1.05896e-14		Stxbp6	0.30303	0
Ankrd29	0.0133016	0.816323	0.016	0.007	1		Gpr18	0.000162844	0.631384	0.023	0.014	1		Ralgps1	0.302821	0
Tada2b	0.144534	0.8161	0.011	0.006	1		Mtif3	0.00384659	0.631029	0.023	0.015	1		Dcbld2	0.302764	0
Rps27l	0.0941698	0.815337	0.011	0.006	1		Pcolce	1.11515e-20	0.630121	0.203	0.137	2.20432e-16		Ttc7b	0.302615	0
Gpsm1	4.7448e-10	0.814199	0.102	0.051	9.37904e-06		Tigd2	1.63358e-08	0.629876	0.065	0.041	0.00032291		Gxylt2	0.301898	0
Chd7	2.23909e-05	0.81213	0.075	0.032	0.442602		Igf2r	1.1697e-77	0.629529	0.633	0.477	2.31215e-73		Ahdc1	0.301269	0
Gli1	1.09278e-12	0.811577	0.071	0.036	2.16009e-08		Rfc3	4.45721e-05	0.629417	0.019	0.01	0.881057		Mcmbp	0.300759	0
Diaph3	4.10448e-06	0.810539	0.022	0.009	0.0811333		Ankrd1	2.88815e-17	0.628786	0.147	0.094	5.70901e-13		Arhgap10	0.299929	0
Haus8	0.00819651	0.809471	0.014	0.007	1		Sertad4	1.46602e-10	0.627971	0.078	0.048	2.89789e-06		Ammecr1	0.29936	0
Opa3	0.00156878	0.809048	0.022	0.012	1		Psmb8	0.0142781	0.627159	0.019	0.014	1		Msrb3	0.298266	0
Ddx11	0.064107	0.808813	0.016	0.007	1		Hes6	0.00767477	0.626583	0.016	0.01	1		Kcnip3	0.298196	0
Crlf2	0.232341	0.804838	0.017	0.008	1		Mcl1	1.59527e-30	0.626436	0.318	0.226	3.15338e-26		Rsrp1	0.298177	0
L3mbtl2	0.0500343	0.803983	0.027	0.012	1		Nxt1	0.0164039	0.625285	0.013	0.008	1		Tango2	0.29817	0
Clip1	1.06154e-27	0.80398	0.23	0.117	2.09834e-23		Rps23	2.12948e-09	0.624517	0.078	0.05	4.20935e-05		Pip5k1c	0.297692	0
Rcan1	0.00164825	0.800712	0.048	0.024	1		Tpi1	0.00011932	0.624513	0.04	0.027	1		Heatr5b	0.297492	0
Nat14	0.0598839	0.798626	0.011	0.005	1		Hspa8	1.32599e-14	0.623957	0.144	0.096	2.62109e-10		Dgkh	0.296989	0
Ccdc84	0.00129785	0.797261	0.036	0.016	1		Fgf18	0.00377033	0.623549	0.01	0.005	1		Slc1a5	0.295495	0
Zbtb16	1.46238e-130	0.796551	0.706	0.452	2.89068e-126		Mrpl20	0.000420733	0.623197	0.033	0.022	1		Dpp4	0.295289	0.790435
Rnaset2a	0.00758875	0.795089	0.01	0.004	1		Slc25a5	1.11535e-05	0.621288	0.024	0.013	0.220472		Dpm1	0.295199	0.511351
Tsc22d4	1.34211e-15	0.79456	0.145	0.076	2.65295e-11		Adrm1	2.99094e-05	0.621219	0.037	0.023	0.591218		Ubp1	0.294308	0
Nat9	0.29004	0.792198	0.015	0.007	1		Tmem60	5.22376e-07	0.620868	0.039	0.023	0.0103258		Mrc2	0.293646	0
Ddx39	0.0075563	0.789836	0.014	0.006	1		Bet1l	3.80943e-11	0.620843	0.096	0.062	7.5301e-07		Dlg2	0.293272	0
Slc16a6	0.305649	0.789278	0.01	0.004	1		Reep4	0.0244004	0.620484	0.017	0.012	1		Ptpn11	0.293126	0
Fam163b	0.00176907	0.787935	0.013	0.007	1		Zmynd15	0.00122837	0.620421	0.029	0.02	1		Tspan5	0.292135	0
Ctns	0.000493194	0.784764	0.043	0.022	1		Taf1d	9.63009e-24	0.620059	0.226	0.152	1.90358e-19		Ehmt2	0.291464	0
Gpld1	0.0962226	0.783886	0.015	0.007	1		Uqcc2	0.00125102	0.619516	0.022	0.014	1		Mylip	0.291407	0
Erf	2.51068e-09	0.782879	0.056	0.031	4.96286e-05		Smdt1	4.8363e-06	0.619435	0.059	0.041	0.0955991		Reep3	0.291196	0
Isca2	0.513373	0.78162	0.039	0.021	1		Eif1	3.00731e-34	0.619272	0.309	0.208	5.94456e-30		Zfp410	0.291104	0
Trmt10b	0.00173288	0.781384	0.017	0.008	1		Sh3d21	0.000117917	0.618415	0.043	0.029	1		Jag1	0.290992	0
Ankrd10	3.52011e-08	0.780853	0.158	0.079	0.00069582		Casp1	0.0315636	0.618118	0.01	0.006	1		Son	0.290015	0.261878
Ubxn8	8.96976e-05	0.780784	0.029	0.014	1		Nppa	0.0517643	0.618041	0.017	0.013	1		March3	0.289844	0
Tmsb4x	1.67041e-10	0.78062	0.066	0.04	3.3019e-06		Utp3	0.000148216	0.617532	0.049	0.035	1		Ppp6r2	0.28945	0
Zfp512b	0.00420576	0.779988	0.036	0.017	1		Zfp422	0.0173436	0.617177	0.016	0.011	1		Acap3	0.289332	0
Zfp219	0.0367799	0.778847	0.041	0.019	1		Eif2b1	0.00453586	0.616078	0.022	0.014	1		Prex2	0.288986	0
Stard7	0.025114	0.778589	0.053	0.028	1		Tmem41a	0.0780282	0.615399	0.011	0.008	1		Glyr1	0.288529	0
Paqr7	0.128854	0.777944	0.01	0.004	1		Nek8	0.0326729	0.615244	0.027	0.02	1		Ranbp17	0.288104	0
Maz	0.000712629	0.777433	0.041	0.018	1		Igsf6	0.00507497	0.615177	0.013	0.007	1		Chd3	0.286478	0
Bcl2l12	9.66146e-05	0.773358	0.033	0.014	1		Fam210b	0.0241389	0.614741	0.013	0.009	1		Cables1	0.286237	0
Dpp7	0.000224449	0.772232	0.023	0.011	1		Rpl15	2.46347e-07	0.613901	0.057	0.036	0.00486953		Dnajc8	0.286002	0
Usp19	1.18727e-08	0.771671	0.111	0.051	0.000234689		Piezo2	0.000102878	0.612307	0.044	0.03	1		Nr3c2	0.284306	-0.38877
Klhdc1	0.129026	0.770571	0.031	0.016	1		Atp5d	5.43871e-07	0.611437	0.06	0.039	0.0107507		Rbp1	0.28422	0
Madd	9.81765e-05	0.769455	0.017	0.008	1		Fam227b	5.39777e-05	0.611434	0.025	0.014	1		Pdcd4	0.283241	0.277185
Zfp385b	0.000464825	0.767424	0.011	0.004	1		Cfl2	4.13045e-22	0.611234	0.248	0.175	8.16467e-18		Uvrag	0.282647	0
Flt3l	1.04538e-30	0.766037	0.257	0.141	2.0664e-26		Zfp637	0.00254199	0.61121	0.036	0.026	1		Abca9	0.282138	0
Srsf2	4.57937e-17	0.765334	0.225	0.131	9.05203e-13		Bmyc	0.0282879	0.610208	0.023	0.017	1		Adamtsl4	0.281288	0.468265
Zfp667	0.0484586	0.765158	0.016	0.009	1		Lyrm2	0.000138642	0.610137	0.023	0.013	1		Gab1	0.280867	0
Fam214a	4.63607e-26	0.764262	0.227	0.12	9.16412e-22		Tfe3	1.35083e-09	0.609942	0.095	0.064	2.67019e-05		Glb1	0.280641	0
Ace	4.0177e-32	0.761141	0.213	0.112	7.94178e-28		Ptma	1.97566e-27	0.609888	0.348	0.259	3.90528e-23		Hdac7	0.280539	0
Phkg2	3.28058e-05	0.760849	0.059	0.028	0.648473		Nsdhl	0.000330849	0.609473	0.026	0.016	1		Pdgfd	0.278934	0
Timp3	1.9139e-39	0.759476	0.455	0.322	3.78321e-35		Psmd7	9.09822e-12	0.609262	0.12	0.081	1.79844e-07		Synpo	0.278545	0
Nr1d2	1.04351e-60	0.757618	0.416	0.234	2.06271e-56		Hes1	4.08477e-16	0.60847	0.257	0.196	8.07437e-12		Plod2	0.278263	0.246009
Lrriq3	0.0129911	0.757421	0.011	0.005	1		Myl4	0.00277908	0.608323	0.017	0.011	1		Mdm2	0.277882	0
Tsta3	0.00847773	0.756311	0.024	0.012	1		Cryz	0.0252809	0.608318	0.012	0.008	1		Zbtb7a	0.27697	0
Lims2	6.26448e-28	0.75461	0.239	0.134	1.2383e-23		Timm8b	0.00168405	0.607752	0.014	0.008	1		Ccnh	0.276458	0
Plekhg5	4.46342e-06	0.751713	0.044	0.02	0.0882285		Ifi27	5.46212e-16	0.607711	0.141	0.092	1.0797e-11		Pkd1	0.276023	0
Fpgs	0.000877989	0.751544	0.04	0.022	1		Arhgef19	0.000282341	0.606997	0.037	0.025	1		Celf1	0.275919	0
Hadha	0.72886	0.75042	0.103	0.058	1		Gstt2	1.71515e-13	0.606411	0.131	0.087	3.39034e-09		Sec11a	0.275421	0
Unc5b	2.20718e-12	0.749118	0.1	0.05	4.36293e-08		Saxo2	0.49037	0.606314	0.01	0.009	1		Heyl	0.273945	0
Lrrc8a	3.07261e-14	0.746565	0.089	0.043	6.07363e-10		Abhd14b	4.78361e-09	0.60587	0.084	0.056	9.45576e-05		Ank2	0.273704	0
Nudt3	0.00396104	0.745231	0.057	0.028	1		Nr4a3	2.36986e-10	0.605476	0.217	0.172	4.6845e-06		Plod1	0.272782	0
Rnf40	3.94623e-05	0.744269	0.048	0.025	0.780051		Pqbp1	0.00140714	0.604917	0.025	0.017	1		Adnp	0.272708	0
Rnf166	3.32833e-06	0.743696	0.055	0.024	0.0657911		Nfatc4	1.94412e-07	0.604709	0.086	0.061	0.00384294		Abhd2	0.272228	0
Mrpl14	0.718142	0.74357	0.023	0.013	1		Mrps14	0.00165178	0.604126	0.028	0.019	1		Spast	0.272087	0
Vamp3	0.00128112	0.741114	0.026	0.012	1		Tnnt3	0.000356805	0.603924	0.024	0.014	1		Golph3	0.272015	0.309369
Ctnnbip1	0.135703	0.740635	0.027	0.014	1		Adnp	0.0364558	0.602825	0.013	0.009	1		Rev1	0.271943	0.303261
Thrb	9.09573e-17	0.740562	0.119	0.061	1.79795e-12		Cox7c	3.83342e-24	0.602182	0.207	0.134	7.57752e-20		Mapk14	0.27185	0
Wdr1	8.74669e-06	0.73961	0.07	0.039	0.172896		Mthfd2	0.000940733	0.602053	0.026	0.017	1		Dip2c	0.27053	-0.232207
Dynll2	0.903052	0.739558	0.029	0.02	1		Srsf7	1.45431e-33	0.601803	0.319	0.219	2.87473e-29		Cul9	0.270486	0
Pde7b	3.70728e-27	0.738891	0.284	0.153	7.32817e-23		Slc3a2	1.50682e-09	0.600606	0.099	0.067	2.97853e-05		Ptprg	0.27034	-0.341654
Mob3c	0.000396037	0.736868	0.036	0.021	1		Pdk3	5.56401e-05	0.597858	0.035	0.022	1		Map4	0.270315	0
Ngef	2.28813e-06	0.733285	0.024	0.01	0.0452295		Dynlt1c	2.45272e-18	0.597569	0.189	0.129	4.8483e-14		Cnot3	0.270207	0
Inafm1	0.0063108	0.73186	0.027	0.013	1		Atp5j	4.12111e-10	0.59735	0.086	0.055	8.1462e-06		Mn1	0.269331	0
Leng8	2.47387e-11	0.731763	0.187	0.101	4.8901e-07		Sh3bp1	5.95914e-05	0.597207	0.045	0.03	1		Mtor	0.26721	0
Asb1	0.405347	0.731173	0.016	0.011	1		Snx21	1.62397e-14	0.5961	0.14	0.093	3.2101e-10		Prkag1	0.267137	0
Lipe	3.71486e-05	0.730902	0.035	0.017	0.734317		Pop4	0.00363925	0.596015	0.026	0.018	1		Cdk7	0.266835	0
Apeh	0.541028	0.729764	0.019	0.01	1		Cdk2ap2	0.00122708	0.593458	0.026	0.017	1		Kif13a	0.266247	0
Brca2	0.00245986	0.728532	0.025	0.015	1		Pex10	0.0172461	0.593451	0.029	0.022	1		Gstt1	0.266083	0
Shc3	9.24234e-08	0.727726	0.062	0.036	0.00182693		Fam229b	0.0139374	0.591748	0.018	0.012	1		Sptan1	0.265278	0
Snx17	0.184281	0.725117	0.017	0.011	1		Tmed3	0.00251622	0.591554	0.034	0.025	1		Ncbp3	0.264999	0
Timm21	0.0190681	0.724693	0.017	0.007	1		Tceal8	0.000590323	0.591513	0.035	0.024	1		Tmod3	0.264782	0
Catsper2	0.0174411	0.72345	0.018	0.008	1		Nutf2	1.26429e-05	0.590594	0.044	0.028	0.249913		Snrnp70	0.264395	-0.266026
Usb1	0.000108591	0.722232	0.022	0.009	1		Ccdc85b	1.75562e-05	0.590159	0.027	0.015	0.347033		Rnd3	0.263664	0
Zwilch	0.0255913	0.72072	0.012	0.007	1		Txnl4a	0.0268893	0.590083	0.013	0.008	1		Arhgef40	0.263482	0
Exo5	0.0889449	0.720552	0.011	0.006	1		Fbxl2	7.3371e-09	0.589856	0.076	0.05	0.000145032		Mpp7	0.26312	0
Gss	0.0947634	0.720496	0.018	0.009	1		Rcor2	0.0119952	0.589578	0.01	0.006	1		Crlf3	0.262502	0
Slc43a2	0.117511	0.720219	0.019	0.013	1		Cenpq	0.0381926	0.589572	0.01	0.007	1		Mpp5	0.262028	0
Fbl	1.74508e-09	0.717933	0.081	0.042	3.44951e-05		Rps16	9.62762e-11	0.589095	0.107	0.072	1.90309e-06		Jade1	0.261875	0
St8sia2	0.0024654	0.716606	0.013	0.007	1		Ier5l	6.01503e-06	0.588833	0.058	0.04	0.118899		Lmna	0.26184	0.355818
Tcn2	0.000238056	0.715663	0.024	0.009	1		Thnsl2	3.22069e-06	0.58825	0.041	0.025	0.0636633		Zfp521	0.26124	0
F2r	1.73082e-05	0.714553	0.053	0.03	0.342131		Slc50a1	5.54274e-17	0.588047	0.191	0.134	1.09563e-12		Phldb2	0.261105	0
Jmjd4	0.0324888	0.71301	0.01	0.006	1		Mob3a	6.25141e-08	0.5872	0.068	0.044	0.00123572		Pdzrn3	0.260998	0
Rgs10	0.00060783	0.712704	0.036	0.019	1		Rpusd4	0.00113776	0.587138	0.027	0.018	1		Fsd1l	0.259666	0
Mrs2	2.68866e-05	0.711846	0.079	0.037	0.531467		Dalrd3	1.70016e-08	0.587059	0.087	0.059	0.00033607		Anxa1	0.258408	0
Sik1	8.90803e-15	0.710589	0.094	0.052	1.76085e-10		Rpl9	1.13716e-08	0.586185	0.098	0.068	0.000224783		Layn	0.258309	0
Zfp956	0.00389237	0.710068	0.02	0.012	1		Rpl18a	2.01196e-09	0.586162	0.087	0.057	3.97704e-05		Nckap5l	0.257663	0
Aurkaip1	0.957136	0.709593	0.013	0.009	1		Taf7	1.1065e-07	0.58604	0.064	0.041	0.00218722		Slc30a5	0.257578	0
Spef1	0.0304087	0.708071	0.015	0.009	1		Cpne2	3.98436e-10	0.585912	0.101	0.068	7.87588e-06		Erp44	0.257489	0
Lxn	0.0112106	0.707599	0.011	0.005	1		Scara3	0.00123955	0.58539	0.025	0.016	1		Il15	0.257163	0
Pcdh11x	0.755954	0.707272	0.011	0.009	1		Rpl7	3.58036e-05	0.584268	0.058	0.041	0.707729		Fnbp1	0.256633	0
Ccdc25	0.000400143	0.707005	0.041	0.022	1		Tomm5	0.00551345	0.584052	0.023	0.016	1		Syk	0.255745	0
Mgll	2.85927e-11	0.706599	0.109	0.049	5.65191e-07		Zfp408	4.03168e-07	0.583872	0.059	0.038	0.00796942		Maml2	0.254547	0
Spry4	6.98145e-07	0.706043	0.055	0.03	0.0138002		Rap2b	0.000189356	0.583658	0.033	0.021	1		Tnpo1	0.253586	0
Tmem8b	0.00010377	0.704498	0.033	0.016	1		Gadd45b	9.56438e-05	0.583415	0.05	0.035	1		Apcdd1	0.253305	0
Rnf122	0.0127298	0.704084	0.016	0.006	1		Angpt2	0.00726618	0.582797	0.024	0.017	1		Necab1	0.25327	0
Lrrc75a	1.03184e-13	0.703564	0.103	0.054	2.03964e-09		Exosc3	0.00117817	0.58256	0.027	0.018	1		Phrf1	0.2526	0
Atf1	1.3351e-13	0.700441	0.137	0.07	2.6391e-09		Mrpl57	5.73161e-05	0.582098	0.026	0.015	1		Vim	0.252058	0
Nlrx1	0.0190132	0.700413	0.025	0.016	1		Nepro	0.00212855	0.581637	0.024	0.016	1		Zmiz1	0.251963	0
Alg2	0.000302517	0.699842	0.044	0.024	1		Pnkp	1.01124e-05	0.581598	0.06	0.042	0.199893		Dync1h1	0.251512	0
Xpc	2.28549e-05	0.698031	0.054	0.031	0.451773		Dpm3	2.36664e-05	0.581446	0.042	0.027	0.467814		Caprin1	0.251222	0
Pnpla7	3.05696e-16	0.697866	0.113	0.062	6.0427e-12		Zfp213	0.00293936	0.58091	0.017	0.01	1		Ptms	0.250772	0.415721
Ing2	0.00678121	0.697154	0.011	0.006	1		Mrpl17	0.00098068	0.579873	0.027	0.018	1		Lcor	0.25042	0
Gcnt7	0.000227611	0.696474	0.035	0.016	1		Ubxn11	0.00750582	0.579837	0.014	0.008	1		Klf13	0.250166	0
Rasef	0.134233	0.696374	0.028	0.019	1		Jund	5.54518e-19	0.579674	0.318	0.249	1.09612e-14		Sesn1	0.249654	0
Rrp1	0.00645742	0.696281	0.035	0.018	1		Postn	0.157258	0.579646	0.031	0.027	1		Tbc1d12	0.249443	0
Snapc4	0.000137004	0.69527	0.052	0.028	1		Fgf11	0.124643	0.579207	0.011	0.008	1		Gria3	0.249067	0
Ephx1	4.84838e-34	0.695138	0.259	0.146	9.58379e-30		Fkbp2	2.81686e-05	0.578848	0.035	0.022	0.55681		Dpyd	0.247968	-0.283803
Psma4	0.00278953	0.693852	0.028	0.013	1		Wbp2	1.20681e-14	0.578737	0.113	0.07	2.38551e-10		Coro1c	0.247752	0
Abca1	4.79954e-49	0.69361	0.4	0.246	9.48725e-45		Tubg1	0.0397993	0.578591	0.013	0.009	1		Sbf1	0.247456	0
Man2b1	1.25913e-06	0.693239	0.067	0.037	0.0248892		Ppp2r5b	0.00273174	0.578502	0.028	0.019	1		Purb	0.246937	0.451022
Ftsj3	0.332592	0.692459	0.019	0.014	1		BC005561	2.90552e-12	0.578077	0.156	0.111	5.74335e-08		Stxbp1	0.246916	0
Mllt6	4.86474e-10	0.691776	0.094	0.046	9.61614e-06		Gpld1	0.000648533	0.577743	0.019	0.011	1		Syne1	0.246399	0
Slbp	0.0001755	0.691171	0.047	0.026	1		Ccng2	0.000139259	0.576195	0.057	0.042	1		Pabpn1	0.246359	0
Cnn2	0.000279843	0.690865	0.063	0.036	1		Pcdhb16	0.134222	0.576164	0.018	0.015	1		Cyfip1	0.245983	0
Gpaa1	0.014864	0.690388	0.028	0.014	1		Fgl2	0.105627	0.575178	0.019	0.015	1		Thra	0.245186	0
Gin1	0.0821047	0.690314	0.032	0.017	1		Nkapl	0.00401722	0.574902	0.018	0.011	1		Ehbp1	0.244857	0
Atp6v0a4	0.00105855	0.689105	0.016	0.007	1		Ahnak2	2.96891e-12	0.574543	0.124	0.083	5.86864e-08		Pabpc4	0.244424	0
Szt2	4.10637e-06	0.688025	0.053	0.027	0.0811706		Lsm3	0.00598972	0.574079	0.024	0.017	1		Fam76a	0.243998	0
Uckl1	0.00625612	0.687674	0.049	0.026	1		Wdr74	0.00653508	0.57353	0.03	0.022	1		Lima1	0.243989	0
Samm50	0.97043	0.687067	0.016	0.016	1		Kctd7	0.0363929	0.573453	0.016	0.011	1		Mapk8ip3	0.241097	0
Msi2	3.65804e-61	0.686201	0.518	0.319	7.23085e-57		Zfr2	3.1241e-05	0.573273	0.051	0.035	0.61754		Lcorl	0.239292	0
Sap25	4.30849e-07	0.68567	0.068	0.031	0.0085166		Uqcrb	0.000216517	0.572496	0.052	0.038	1		Oaf	0.238498	0
Gpx4	0.964067	0.684784	0.023	0.021	1		Tmem243	5.65216e-19	0.57165	0.196	0.133	1.11726e-14		Rbpms	0.23849	0
Wdr25	3.7166e-05	0.68472	0.058	0.031	0.734661		Golm1	0.0676718	0.571599	0.019	0.015	1		Csde1	0.237618	0
Pamr1	9.24706e-14	0.68423	0.096	0.053	1.82787e-09		Alg5	9.74482e-05	0.571053	0.057	0.041	1		Spen	0.237354	0
Atxn2l	3.15553e-13	0.684072	0.137	0.075	6.23753e-09		Usp21	1.39149e-06	0.570881	0.034	0.019	0.0275056		Syde1	0.237083	0
Senp8	0.64201	0.684024	0.021	0.01	1		Rasl11b	0.0103012	0.570618	0.021	0.015	1		Ogt	0.236701	0.182644
Ube2q1	3.86896e-07	0.683723	0.052	0.028	0.00764778		Kctd21	0.00740667	0.569643	0.023	0.016	1		Ptprs	0.236463	0
Ttll11	0.19606	0.682411	0.017	0.008	1		Nppb	2.97829e-06	0.567928	0.054	0.036	0.0588719		Clstn1	0.236358	0
Mbd3	0.00338095	0.682053	0.038	0.02	1		Il2rg	0.0307303	0.567489	0.01	0.007	1		Bmp4	0.236203	0
Rabggta	0.0192128	0.680149	0.011	0.005	1		Btg2	9.54156e-48	0.566059	0.726	0.653	1.88608e-43		Dazap1	0.236191	0
Spsb1	6.64942e-19	0.679366	0.168	0.1	1.31439e-14		Nop10	0.0129493	0.56542	0.02	0.014	1		Pus7	0.236097	0
Pex10	0.0210055	0.67866	0.024	0.014	1		Vps37d	0.00313107	0.565064	0.028	0.019	1		Ptprj	0.235574	0
Phlda3	2.87182e-05	0.677955	0.031	0.015	0.567674		Celf4	0.422959	0.564873	0.018	0.016	1		Kcp	0.234606	0.333712
Tmem202	0.0149897	0.677771	0.011	0.006	1		Cxcl16	0.00130581	0.564561	0.026	0.017	1		Arhgef6	0.234577	0
Scamp3	0.0592305	0.677483	0.027	0.016	1		Rpl30	2.18936e-11	0.564499	0.105	0.069	4.32772e-07		Nras	0.234019	0
Aff2	8.13349e-06	0.677195	0.046	0.022	0.160775		Thoc6	0.00483997	0.564192	0.017	0.011	1		Chordc1	0.233541	0
Fchsd1	0.00131918	0.676857	0.021	0.011	1		Cdc42ep2	8.57195e-07	0.563963	0.065	0.044	0.0169442		Bmp1	0.233225	0
Alpl	0.279975	0.676611	0.014	0.007	1		Aarsd1	0.00114185	0.563496	0.013	0.007	1		Bmp2k	0.233032	0
Map7d1	1.72464e-06	0.676384	0.096	0.047	0.034091		Ddit3	5.00685e-14	0.562484	0.159	0.11	9.89704e-10		Ghr	0.232909	0
Ttc38	0.0117234	0.674284	0.022	0.011	1		Med21	1.66976e-05	0.56196	0.056	0.039	0.330062		Stard9	0.232812	0
Slc25a25	7.97696e-06	0.673618	0.06	0.036	0.157681		Ppp1r14a	6.36069e-12	0.56178	0.119	0.08	1.25732e-07		Nrip1	0.232255	0
Ruvbl1	0.00218266	0.673337	0.034	0.018	1		Ndufb6	0.00096833	0.55933	0.029	0.02	1		Igf1r	0.231074	-0.250242
Prr5	5.50205e-06	0.669982	0.044	0.024	0.108759		Bloc1s2	1.57113e-05	0.559267	0.069	0.05	0.310566		Acvr1	0.23054	0
Ap1s1	7.19656e-08	0.66927	0.065	0.034	0.00142254		Imp3	1.19797e-06	0.559197	0.063	0.042	0.0236803		Urgcp	0.230537	0
Cpeb1	2.17433e-53	0.667242	0.451	0.273	4.298e-49		Taf5	3.9312e-06	0.558917	0.044	0.027	0.0777081		Tial1	0.230323	0
Emc6	0.839371	0.666836	0.014	0.009	1		Vamp2	1.12259e-12	0.55879	0.153	0.108	2.21902e-08		Anks1	0.229832	0
Aebp1	9.18859e-18	0.666525	0.132	0.073	1.81631e-13		Rps18	3.6113e-09	0.558133	0.095	0.065	7.13846e-05		Cab39	0.228946	0
Fam13a	0.0144029	0.666495	0.047	0.021	1		Lrpap1	7.82039e-07	0.557856	0.067	0.045	0.0154586		Csnk1e	0.228242	0
Mat2a	8.63544e-34	0.664659	0.309	0.198	1.70697e-29		Mrps24	2.10694e-07	0.557808	0.062	0.04	0.00416479		Slc12a4	0.228103	0
Prelid1	0.0158577	0.664653	0.021	0.01	1		Calml4	0.0136967	0.557391	0.011	0.007	1		Tbc1d22a	0.227948	0
Impdh2	0.590387	0.664439	0.017	0.008	1		Tubb4a	5.12865e-05	0.556914	0.022	0.012	1		Cramp1l	0.22737	0
Jam2	4.65713e-12	0.66438	0.08	0.042	9.20576e-08		Tbx15	0.0102058	0.556907	0.018	0.012	1		R3hcc1l	0.227338	0
Eef1e1	0.00462301	0.663889	0.02	0.009	1		Srp9	0.000496192	0.556422	0.051	0.037	1		Otud7b	0.227011	0
Itga9	2.76152e-53	0.662312	0.469	0.283	5.45869e-49		Ppp1r14b	0.000642236	0.55636	0.029	0.019	1		Grik2	0.226939	0
Nop10	0.580199	0.661434	0.017	0.01	1		Rpl41	1.06394e-16	0.556268	0.149	0.097	2.10309e-12		Lats2	0.226035	0
Zfp867	0.207248	0.661132	0.019	0.011	1		Snrpg	0.000314368	0.555815	0.035	0.024	1		Fam222b	0.225331	0
Tmem106a	0.00164652	0.660319	0.03	0.018	1		Fzd2	0.0130458	0.555714	0.014	0.009	1		Etv1	0.225195	0
Zdhhc8	2.58304e-06	0.659651	0.076	0.042	0.051059		Izumo4	1.25607e-10	0.555652	0.098	0.065	2.48288e-06		Pou2f1	0.22479	0
Wdr83	0.000226159	0.659506	0.043	0.019	1		Parp3	8.01332e-19	0.555118	0.199	0.136	1.58399e-14		Taco1	0.224511	0
Nfyc	6.09513e-08	0.658535	0.103	0.048	0.00120483		Mrpl18	0.00106224	0.554822	0.028	0.018	1		Sulf1	0.223842	0.149659
Pfn1	7.32017e-05	0.658425	0.046	0.024	1		Chrac1	0.000143801	0.554584	0.038	0.025	1		Cdk6	0.223549	0
Chmp7	0.0749404	0.657308	0.028	0.018	1		B3galnt1	0.0254018	0.554362	0.012	0.008	1		Rnf130	0.223536	0
Mapkapk3	0.0193814	0.65676	0.051	0.026	1		Gltp	0.0692539	0.554168	0.017	0.013	1		Hs3st3a1	0.222769	0
Eif2b5	0.0244042	0.656051	0.042	0.024	1		Zranb2	2.39437e-24	0.553888	0.302	0.22	4.73296e-20		Ampd2	0.222146	0
Myadm	2.42789e-15	0.655972	0.112	0.058	4.79921e-11		H2-T23	0.000806876	0.553599	0.042	0.03	1		Col16a1	0.221612	0
Ubac1	0.0132679	0.654986	0.046	0.023	1		Dclre1a	0.000355475	0.553092	0.034	0.022	1		Ehd2	0.221427	0
Ankrd39	0.886055	0.654765	0.013	0.009	1		Sqstm1	4.01843e-22	0.552141	0.315	0.236	7.94323e-18		Banp	0.220891	0
Ipo13	0.0085524	0.653634	0.034	0.017	1		Cdkn1c	0.000915451	0.550101	0.039	0.028	1		Ubtd1	0.220646	0
Duoxa1	0.0076981	0.652989	0.018	0.011	1		Taf10	9.62522e-05	0.549716	0.028	0.017	1		Ppp1r9a	0.219974	0
Zcchc4	5.60431e-05	0.652303	0.068	0.033	1		Ubxn8	3.04403e-05	0.549715	0.038	0.024	0.601713		Cuedc1	0.219471	0
Ttc7	3.37447e-15	0.651362	0.12	0.061	6.67032e-11		Zfp553	0.00396369	0.549058	0.021	0.014	1		Smad5	0.218632	0
Slc2a8	0.000809084	0.651177	0.019	0.008	1		Sfxn3	1.95347e-05	0.549038	0.048	0.032	0.386142		Atxn2	0.218333	0
Akip1	0.0424871	0.649867	0.014	0.007	1		Hsbp1	0.00456407	0.548593	0.034	0.025	1		Dnaja1	0.21817	0.466619
Angptl7	0.180381	0.649326	0.01	0.006	1		C1qbp	0.174164	0.547624	0.013	0.011	1		Fmnl3	0.217857	0
Gapdhs	0.194384	0.64855	0.015	0.009	1		Tma7	0.000247974	0.547318	0.039	0.027	1		Ube2g2	0.217573	0
Gjc1	0.00267286	0.648369	0.042	0.024	1		Vps29	1.17482e-11	0.546762	0.109	0.072	2.32226e-07		Wdr66	0.217183	0.66737
Zfp78	0.0607286	0.646483	0.012	0.007	1		Mfap1a	1.53785e-07	0.546671	0.096	0.069	0.00303987		Peli2	0.21689	0
Rab32	0.142295	0.646137	0.011	0.005	1		Dpagt1	3.72467e-05	0.546371	0.045	0.03	0.736256		Tet3	0.216329	0
Eif2b4	0.00413396	0.645337	0.042	0.022	1		Zfp36l1	8.58565e-15	0.545763	0.315	0.252	1.69713e-10		Ncor2	0.216121	0
Ube2b	2.90586e-21	0.645304	0.149	0.075	5.74401e-17		Pop5	3.76097e-06	0.545657	0.04	0.025	0.0743431		Map2k1	0.216004	0
Plcb1	0.000210568	0.645048	0.038	0.019	1		Tnfaip2	7.13951e-14	0.545566	0.174	0.123	1.41127e-09		Thsd7a	0.215882	-0.106473
Fbxo10	0.000186522	0.644061	0.067	0.038	1		Ppt1	3.78791e-14	0.544367	0.151	0.104	7.48756e-10		Atp13a3	0.214989	0
Zbtb43	1.32456e-05	0.641798	0.045	0.026	0.261826		Has2	9.02537e-05	0.543214	0.056	0.04	1		Map1b	0.214551	0
Adgrl1	1.69537e-19	0.641523	0.117	0.06	3.35123e-15		Hmgn2	0.00175585	0.542985	0.027	0.018	1		Cdc14b	0.214393	0
Nudcd2	0.0205453	0.639839	0.043	0.023	1		Basp1	0.00288101	0.54298	0.028	0.02	1		Itpkb	0.212087	0
Fam98c	0.00489804	0.639164	0.024	0.013	1		Ccni	2.41779e-16	0.542784	0.195	0.137	4.77925e-12		Lypla1	0.211758	0
Mef2c	2.98601e-17	0.638366	0.162	0.092	5.90245e-13		Ranbp1	0.000126342	0.542774	0.037	0.025	1		Fam13c	0.21161	0
Crocc	0.0215143	0.638152	0.024	0.01	1		Ldha	6.21784e-08	0.542749	0.079	0.053	0.00122908		Atp8b1	0.210744	0
Eif5a	0.000671621	0.637004	0.03	0.018	1		Rnf26	1.15705e-06	0.542613	0.069	0.048	0.0228713		Sec63	0.210318	0
Acadm	0.838645	0.636847	0.035	0.026	1		Snapin	1.47444e-06	0.542005	0.068	0.046	0.0291453		Zbtb38	0.210135	0
Mbd6	0.012742	0.635926	0.04	0.021	1		Ifitm3	1.62182e-07	0.541899	0.086	0.061	0.00320585		Phka2	0.209818	0
Mast2	8.90633e-15	0.634832	0.198	0.1	1.76051e-10		Harbi1	0.0723335	0.541622	0.019	0.014	1		Yipf1	0.208822	0
Aar2	9.16999e-05	0.63404	0.046	0.027	1		Tmem216	1.38497e-05	0.541275	0.049	0.032	0.273766		Prkce	0.208528	-0.28646
Psat1	0.009492	0.63398	0.011	0.006	1		H3f3a	4.65906e-14	0.541065	0.191	0.139	9.20956e-10		Vps13d	0.208486	0
Rpl9	0.00234716	0.633606	0.04	0.021	1		Flad1	0.015265	0.540892	0.025	0.018	1		Nisch	0.208247	0
Jade3	0.150233	0.633557	0.027	0.015	1		Ndufa4	4.70251e-10	0.540244	0.093	0.061	9.29545e-06		Samd4b	0.207611	0
Lrrc47	0.334008	0.633335	0.011	0.005	1		Rbfa	0.00420307	0.539579	0.023	0.016	1		Ebf1	0.207397	0
Zyx	3.64438e-17	0.633057	0.153	0.084	7.20386e-13		Wdr5b	0.0563974	0.538567	0.01	0.006	1		Snx7	0.20593	0
Pa2g4	0.040753	0.63242	0.038	0.021	1		Rnf181	3.34472e-05	0.538371	0.065	0.047	0.661151		Dock4	0.205431	0
Mlxip	3.38926e-23	0.631541	0.26	0.155	6.69956e-19		Uqcc3	0.0153907	0.537522	0.013	0.008	1		Socs5	0.205344	0
Pcyox1	0.00248868	0.630742	0.035	0.018	1		Mrps10	5.48497e-09	0.537341	0.08	0.052	0.000108421		Wwc2	0.204928	0
Cmah	0.0224311	0.630691	0.04	0.03	1		Ctsl	1.00894e-07	0.537002	0.097	0.069	0.00199437		Runx2	0.204803	0
Dhrs3	0.021765	0.630452	0.047	0.028	1		Grpel1	0.0144211	0.536939	0.022	0.015	1		Aff3	0.204703	0
Gcc1	0.137983	0.629771	0.013	0.008	1		Il27ra	0.00291774	0.536865	0.034	0.025	1		Enox1	0.204441	0
Prrx2	0.00414579	0.629757	0.011	0.006	1		Mrpl38	7.02039e-05	0.536781	0.052	0.037	1		Rab31	0.203971	0
Txnl4a	0.189592	0.629558	0.019	0.011	1		Eif5a2	0.034786	0.536714	0.011	0.007	1		Atp6v0b	0.203788	0.476136
Txn2	0.052534	0.628294	0.059	0.037	1		Ccdc78	0.0232173	0.536137	0.01	0.006	1		Lifr	0.203546	0
Pfkfb3	2.28042e-13	0.628244	0.089	0.051	4.50771e-09		Zfp931	0.000442112	0.534737	0.029	0.019	1		Erc1	0.202141	0
Zfp414	0.0390418	0.627884	0.022	0.011	1		Vamp3	2.92962e-05	0.534329	0.048	0.032	0.579098		Gna12	0.201509	0
Fbxo9	1.82768e-05	0.626823	0.055	0.033	0.361277		Gps2	2.7391e-10	0.533046	0.107	0.072	5.41437e-06		Trip10	0.201407	0
Ppm1g	1.73417e-06	0.62646	0.082	0.048	0.0342794		Nudt21	5.03247e-05	0.533015	0.059	0.042	0.994768		Pam	0.201243	0
Ccdc181	0.0824285	0.625858	0.011	0.006	1		Slc22a17	7.11842e-06	0.532711	0.051	0.033	0.14071		Brf1	0.200195	0
Tppp3	0.017301	0.625708	0.033	0.019	1		Lxn	0.0765321	0.532274	0.01	0.007	1		Plekha4	0.199988	0
Kcnip4	0.0692879	0.625703	0.022	0.01	1		Kazald1	0.00111722	0.531751	0.023	0.014	1		Eif4g1	0.199887	0
Mpp2	0.00789846	0.625646	0.017	0.009	1		Puf60	8.39477e-09	0.530679	0.105	0.074	0.000165939		Ptpn9	0.199795	0
Mrpl53	0.0950823	0.625187	0.022	0.01	1		Hnrnpa0	5.17325e-06	0.530618	0.064	0.044	0.10226		Elf4	0.199434	0
Armc5	0.00347432	0.625104	0.032	0.018	1		Coro1b	5.09431e-08	0.530011	0.071	0.046	0.00100699		Setd7	0.199043	0
Cox7a2	0.871334	0.625021	0.028	0.024	1		Tpmt	0.00368503	0.52906	0.031	0.022	1		Prkg1	0.198686	-0.23938
Trnp1	0.000162006	0.623758	0.038	0.023	1		Lyz2	0.0440985	0.528884	0.017	0.012	1		Khdrbs1	0.198245	0
Ube2g1	9.29176e-27	0.623036	0.245	0.144	1.8367e-22		Hspa1b	0.00669574	0.52883	0.018	0.011	1		Dnah7b	0.197388	0
Fabp5	0.00437184	0.622688	0.011	0.007	1		Igdcc4	9.29754e-08	0.52875	0.077	0.052	0.00183784		Map4k3	0.197305	0
Phf23	0.0128154	0.622684	0.043	0.028	1		Tbl3	0.00399466	0.528627	0.033	0.024	1		Kat6b	0.197117	0
Metap1d	2.03844e-11	0.622541	0.158	0.087	4.02939e-07		Eif2b4	9.38047e-08	0.528424	0.056	0.034	0.00185424		Ktn1	0.197074	0
Il1rapl1	8.59947e-05	0.621933	0.081	0.06	1		Tmem237	1.12186e-05	0.528162	0.051	0.034	0.221757		Git2	0.196944	0
Tmem161a	0.0237884	0.621577	0.036	0.022	1		Fabp5	0.00177778	0.527566	0.039	0.028	1		Tmod2	0.19588	0
Dkk3	0.000214731	0.6214	0.046	0.029	1		Men1	0.0288813	0.527335	0.017	0.012	1		Arhgap23	0.195131	0
Mfge8	0.63225	0.621384	0.018	0.015	1		Rab34	7.69361e-09	0.526827	0.094	0.065	0.00015208		Tyk2	0.194878	0
Adamts6	1.55591e-16	0.620551	0.199	0.104	3.07556e-12		Styxl1	0.00640998	0.526577	0.017	0.011	1		Gnao1	0.194163	0
Wdr90	0.0216802	0.620203	0.014	0.007	1		Apba3	0.00128876	0.52551	0.029	0.019	1		Rapgef1	0.193991	0
Pik3ip1	1.22004e-06	0.619549	0.039	0.018	0.0241164		Fam219b	0.00556001	0.525182	0.024	0.017	1		Pik3r1	0.193963	0
Bpnt1	0.278272	0.619379	0.015	0.009	1		Dhodh	0.00450939	0.525052	0.027	0.019	1		Cux1	0.193666	0
Cln5	0.00393303	0.619105	0.034	0.02	1		Rps3a1	1.01091e-08	0.524393	0.097	0.067	0.000199827		Smurf2	0.193287	0
Rdm1	0.00094351	0.618131	0.025	0.011	1		Znrd1	3.67826e-05	0.52414	0.036	0.023	0.727081		Med14	0.193218	0
Il1rapl2	0.24102	0.617665	0.011	0.007	1		Ddx18	1.75611e-06	0.523875	0.093	0.069	0.034713		Cfl2	0.192248	0.611234
Spx	0.0124294	0.617261	0.012	0.007	1		Gabarap	5.90825e-07	0.523647	0.076	0.052	0.0116788		Mark2	0.19196	0
Ilf3	3.07035e-15	0.615497	0.136	0.075	6.06917e-11		Tmem160	0.0975281	0.523079	0.01	0.007	1		Slc9a1	0.191325	0
Fkbp2	0.343955	0.615107	0.016	0.009	1		Tmed9	3.89066e-07	0.522331	0.09	0.065	0.00769068		Gpc6	0.190971	-0.307794
Chchd3	1.32649e-06	0.614222	0.178	0.098	0.0262206		Mapk11	0.0235867	0.521633	0.016	0.011	1		Apobec3	0.190189	0
Otud3	0.000293808	0.61391	0.039	0.023	1		Wrap73	0.00450641	0.521475	0.034	0.025	1		Dennd6a	0.189955	0
Tomm40	0.00413598	0.613323	0.047	0.027	1		Ier3ip1	0.000107319	0.521058	0.04	0.027	1		Atp2b1	0.18974	0
Zfp706	0.199131	0.612661	0.029	0.016	1		Dpp7	0.0460136	0.519474	0.024	0.019	1		Creb3l2	0.189049	0
Mllt1	0.00492698	0.6126	0.036	0.02	1		Srm	0.00396399	0.519325	0.019	0.012	1		Kmt2a	0.188173	0
Nme6	0.0174254	0.612494	0.024	0.014	1		Cep19	0.00168514	0.519277	0.024	0.016	1		Bgn	0.188103	0.239159
Itgbl1	2.34328e-48	0.612463	0.599	0.441	4.63197e-44		Adh5	0.00750268	0.519012	0.024	0.016	1		Syncrip	0.186822	0
Mfap4	3.5999e-15	0.612137	0.099	0.05	7.11592e-11		Ints2	3.75489e-07	0.518703	0.093	0.067	0.00742229		Ubtd2	0.186523	0
Mrpl32	0.0754462	0.612051	0.02	0.011	1		Klf2	3.35898e-21	0.518514	0.366	0.287	6.63969e-17		Baz1b	0.186151	0
Mafk	2.20671e-06	0.610899	0.038	0.023	0.0436199		Dolpp1	0.0854849	0.517699	0.015	0.011	1		Foxo1	0.185728	-0.427194
Dclre1a	0.239512	0.610696	0.024	0.012	1		Etv4	0.00362595	0.517619	0.014	0.008	1		Chd4	0.185301	0.189026
Ubc	0.16789	0.610455	0.093	0.053	1		Lsm4	0.0144007	0.516848	0.036	0.028	1		Kcmf1	0.185266	0
Ccnd3	1.38334e-53	0.610383	0.496	0.316	2.73445e-49		Nsa2	2.45038e-06	0.516716	0.056	0.037	0.0484368		Cbl	0.185244	0
Cdk10	0.000895702	0.610218	0.053	0.028	1		Ndufaf4	2.80032e-08	0.516674	0.096	0.067	0.000553539		Ptprm	0.185062	-0.224016
Adap2	1.24341e-38	0.610028	0.435	0.288	2.45786e-34		Pcyox1	0.0045083	0.516659	0.041	0.031	1		Tbc1d9b	0.184971	0
Arhgef7	0.000393962	0.608488	0.073	0.039	1		Phlda3	0.00200345	0.515705	0.023	0.015	1		Glcci1	0.184621	0
Stau2	0.00128238	0.607622	0.054	0.026	1		Tmem82	0.12976	0.515442	0.018	0.014	1		Rsf1	0.184341	0
Mef2d	3.01338e-13	0.60693	0.19	0.103	5.95655e-09		Tada3	3.83078e-05	0.51527	0.072	0.053	0.757229		Prkacb	0.183722	0
Slc38a7	0.000300436	0.606843	0.041	0.02	1		Cox7a2	2.20747e-05	0.515186	0.077	0.057	0.43635		Nploc4	0.183095	0
Sh2d3c	0.000369154	0.605443	0.033	0.019	1		Iqcc	0.00689026	0.51473	0.025	0.018	1		Strn	0.183081	0
Hacd3	1.97707e-06	0.604976	0.075	0.045	0.0390808		Inhba	0.000783123	0.514643	0.032	0.022	1		Ptprd	0.182962	0.141809
Rps7	0.000564077	0.604392	0.044	0.026	1		Tlcd2	7.52269e-24	0.514151	0.267	0.187	1.48701e-19		Elmo1	0.182896	-0.204943
Adamtsl2	4.34889e-15	0.604186	0.167	0.109	8.59644e-11		Ptger4	4.35804e-06	0.513939	0.072	0.051	0.0861454		Capza1	0.182434	0
Itga5	5.93453e-20	0.60299	0.213	0.13	1.17308e-15		Jun	3.4401e-10	0.513327	0.373	0.328	6.80004e-06		Cpt1c	0.182283	0
Satb1	1.30475e-05	0.602844	0.082	0.046	0.25791		Cry1	0.0113163	0.512986	0.03	0.022	1		Rasal2	0.182228	0
Alas1	0.0013359	0.602745	0.065	0.038	1		Preb	4.51463e-18	0.512957	0.181	0.122	8.92406e-14		Rusc2	0.18024	0
Fdx1	0.665776	0.602655	0.019	0.012	1		Rps10	5.30975e-08	0.512842	0.08	0.054	0.00104958		Upf2	0.180001	0
Srsf6	3.77436e-18	0.602262	0.255	0.143	7.46078e-14		Iqck	0.00640058	0.51258	0.036	0.027	1		Mapkap1	0.179976	0
Pqlc2	0.017796	0.602041	0.022	0.012	1		Wee1	3.63948e-05	0.512472	0.057	0.04	0.719415		Stk38	0.179543	0
Sec14l1	9.28491e-18	0.600083	0.22	0.129	1.83535e-13		Ssu2	0.0273377	0.511881	0.01	0.006	1		Myof	0.179466	0.210493
Trpm3	0.0204148	0.599842	0.03	0.017	1		Eif2b5	0.000447069	0.511844	0.043	0.03	1		Appbp2	0.178505	0
Stk32b	1.49904e-06	0.599715	0.039	0.02	0.0296314		Dpm1	9.48593e-08	0.511351	0.075	0.05	0.00187508		Fam117b	0.177924	0
Klc2	0.0437799	0.599403	0.023	0.014	1		Dnpep	0.000121105	0.511125	0.048	0.033	1		Zmym5	0.177722	0
Tex30	0.0350692	0.599047	0.011	0.007	1		Tmco6	0.00187281	0.51097	0.039	0.028	1		Ptp4a2	0.177134	0
Jade2	1.42811e-05	0.599011	0.06	0.036	0.282295		Cebpz	1.75129e-08	0.509597	0.135	0.101	0.000346178		Hnrnpk	0.177013	0
Slc18a2	0.135849	0.598429	0.011	0.006	1		Mrpl51	0.0472596	0.50953	0.022	0.016	1		Sik2	0.17692	0
Slc25a51	3.39426e-08	0.596578	0.092	0.046	0.000670943		Exoc3l4	0.00144636	0.509497	0.037	0.027	1		Sbno1	0.176276	0
Ppp1r18	5.42302e-10	0.594881	0.067	0.036	1.07197e-05		Tnfaip6	4.55231e-06	0.509442	0.099	0.075	0.0899855		Tsc22d2	0.176226	0
Rpl37a	0.00301173	0.594601	0.062	0.041	1		Mettl21a	0.00851613	0.509123	0.028	0.021	1		Rnf169	0.176155	0
Grcc10	0.0398328	0.594387	0.023	0.01	1		Mdga1	0.0225302	0.508393	0.014	0.009	1		Gabpb2	0.176077	0
Cebpb	1.70814e-05	0.594153	0.031	0.019	0.337648		Ccdc28b	7.90564e-08	0.508013	0.1	0.072	0.00156271		Gpbp1l1	0.175456	0
Nr4a3	7.56477e-07	0.594105	0.017	0.01	0.0149533		Rpl19	4.80394e-05	0.507754	0.085	0.065	0.949595		Nox4	0.175426	0
Coq10b	3.25848e-31	0.593778	0.156	0.09	6.44105e-27		Rpl10a	5.78047e-10	0.507654	0.118	0.083	1.14262e-05		Asxl1	0.175418	0
Zdhhc9	0.00342355	0.593631	0.041	0.025	1		Atp5e	4.57673e-05	0.507239	0.069	0.05	0.904683		Cdk14	0.175395	0
Abcf1	7.39493e-12	0.593511	0.121	0.065	1.46176e-07		Ino80b	0.0128147	0.507048	0.022	0.016	1		Man2a2	0.175093	0
Fam171a2	0.00551803	0.59235	0.025	0.015	1		Pdcd2	0.0123049	0.507035	0.013	0.008	1		Dlgap4	0.174739	0
Ikzf5	0.00498894	0.592313	0.024	0.012	1		Tmem14c	0.000559881	0.506716	0.029	0.019	1		Cpne1	0.173475	0
Tkt	0.00557345	0.592275	0.04	0.019	1		Tmed2	1.72397e-15	0.506345	0.191	0.135	3.40777e-11		Rarg	0.172986	0
Trmt10a	0.0333046	0.591667	0.018	0.011	1		Tmem107	0.00447324	0.506273	0.021	0.014	1		Efna5	0.172601	0
Il17rc	1.37186e-05	0.591052	0.04	0.024	0.271176		Tmem173	0.00431157	0.505868	0.019	0.013	1		Krit1	0.172341	0.206193
Egln3	0.20213	0.590113	0.015	0.01	1		Timm21	0.00336193	0.505798	0.032	0.023	1		Fhit	0.172034	0
Nkain1	0.0196957	0.589969	0.026	0.017	1		Snrnp35	0.014033	0.505542	0.016	0.011	1		Slit3	0.17186	-0.387392
Bbc3	0.129692	0.589654	0.012	0.009	1		Apip	0.000674801	0.505525	0.036	0.025	1		Hip1	0.171482	0
Bhlhe40	2.06248e-17	0.589237	0.119	0.059	4.07691e-13		Armcx4	0.0134381	0.505363	0.029	0.021	1		Nhlrc2	0.171347	0
Rplp2	0.0011498	0.588029	0.045	0.025	1		Thoc7	7.66127e-09	0.50531	0.11	0.078	0.00015144		Cipc	0.171078	0
Ptgds	0.000529504	0.587758	0.012	0.008	1		Vps9d1	3.08275e-05	0.505281	0.061	0.043	0.609366		Ppp1r9b	0.171073	0
Pdap1	0.00160772	0.587467	0.032	0.02	1		Atxn7l3	0.000261235	0.503458	0.039	0.027	1		Ppp2r2d	0.170866	0
Eps8l1	1.31688e-08	0.586937	0.049	0.027	0.000260307		Slc15a3	0.444803	0.50345	0.012	0.011	1		Mtf2	0.170748	0
Plcd1	0.00777898	0.586887	0.04	0.022	1		Fxyd5	7.5497e-05	0.503236	0.053	0.037	1		Larp1	0.170228	0
Nr1d1	8.74283e-24	0.586703	0.225	0.12	1.72819e-19		Gba2	6.34968e-05	0.503204	0.044	0.029	1		Arhgap5	0.16986	0
Csrp2	2.87695e-07	0.586652	0.07	0.043	0.00568686		Nr2c2ap	0.111729	0.502517	0.019	0.016	1		Fchsd2	0.169701	0
Gpr21	0.0091746	0.586552	0.012	0.006	1		Rpl27a	8.86612e-08	0.502328	0.113	0.083	0.00175257		Acvrl1	0.169687	0
Neu1	0.00506316	0.586518	0.027	0.015	1		Rps17	0.00138219	0.501775	0.051	0.039	1		Akap13	0.168981	0
Cln6	0.0932327	0.585241	0.013	0.006	1		Pik3r4	3.28468e-05	0.500739	0.084	0.064	0.649282		Ctdspl2	0.168881	0
Hadhb	0.625319	0.58423	0.078	0.05	1		Zfp830	0.00285422	0.500537	0.035	0.025	1		Smc4	0.16821	0
Spink10	0.00512583	0.584183	0.038	0.025	1		Cfhr2	0.126665	0.500065	0.012	0.009	1		Ptpn12	0.167392	0
Ppp1ca	0.665531	0.582757	0.036	0.024	1		Nfyb	3.06027e-06	0.499633	0.052	0.034	0.0604923		Cbfb	0.167198	0
Eif2b1	0.19557	0.582753	0.011	0.008	1		Ndufb10	2.96063e-07	0.499488	0.053	0.033	0.00585228		Naaladl2	0.167178	0
Boc	9.30388e-19	0.582541	0.19	0.114	1.8391e-14		Arsi	0.0729051	0.499392	0.014	0.01	1		Ube2h	0.167067	0
Acrbp	0.00556937	0.581712	0.034	0.017	1		Nip7	0.00853644	0.499359	0.034	0.026	1		Memo1	0.166931	0
Mospd3	0.253735	0.580889	0.015	0.008	1		Slc38a2	8.04517e-27	0.499231	0.425	0.332	1.59029e-22		Prickle1	0.166371	0
Prmt1	0.00351718	0.57946	0.032	0.015	1		Insig1	5.77193e-05	0.498925	0.038	0.025	1		Bmp6	0.166322	-0.287055
Rmnd5b	0.000491134	0.579343	0.043	0.025	1		Rdh5	1.94108e-07	0.498867	0.088	0.062	0.00383693		Mef2a	0.166246	-0.241136
Polr2g	0.105957	0.579311	0.026	0.015	1		Pmf1	0.117797	0.498792	0.013	0.01	1		Adcy9	0.166232	0
Loxl4	0.000214102	0.578964	0.015	0.007	1		Rnf215	8.57605e-05	0.498645	0.067	0.05	1		Wdr20	0.165553	0
Myo7a	0.00190828	0.578246	0.022	0.011	1		Nle1	0.0294946	0.498624	0.028	0.022	1		Gli2	0.165234	0
Ptpn4	0.0170796	0.57816	0.088	0.046	1		Tbc1d7	0.00292401	0.498283	0.039	0.029	1		Kirrel	0.165046	0
Prx	0.00900573	0.577169	0.016	0.01	1		Ttf2	0.0162853	0.497358	0.027	0.02	1		Adk	0.164553	-0.24746
Hif1a	0.118058	0.577036	0.063	0.032	1		Yeats4	0.00114245	0.496447	0.026	0.017	1		Chn1	0.164489	0
Nt5c	0.00159637	0.576968	0.039	0.021	1		Zfyve28	0.0226836	0.496354	0.038	0.03	1		Lyn	0.164115	0
Amotl2	5.6988e-06	0.576725	0.072	0.04	0.112648		Lrrc57	3.06395e-05	0.496272	0.039	0.025	0.60565		Pcolce2	0.163749	0
Anxa11	7.28673e-07	0.576382	0.082	0.046	0.0144037		Tubb4b	6.19988e-06	0.495971	0.051	0.034	0.122553		Uimc1	0.163572	0
Agl	0.335365	0.576163	0.049	0.024	1		Mettl2	0.000114847	0.495609	0.055	0.039	1		Sh3rf1	0.163441	0
Hectd3	0.000330092	0.575375	0.045	0.024	1		Snrpd2	0.0164854	0.495455	0.022	0.016	1		Ssbp3	0.163218	0
Prkd1	1.72908e-07	0.57509	0.131	0.071	0.00341788		Rpl34	0.00294905	0.495343	0.069	0.055	1		Capn7	0.16302	0.298942
Ppfia1	3.51026e-09	0.575014	0.148	0.074	6.93874e-05		P3h4	0.00224804	0.494623	0.032	0.022	1		Macf1	0.162546	0
E2f6	0.170059	0.573646	0.029	0.016	1		Cox6a2	7.05785e-11	0.494473	0.115	0.078	1.39513e-06		Ip6k1	0.16249	0
Sema6c	0.0333092	0.573638	0.032	0.022	1		Ms4a6c	9.09212e-05	0.49408	0.029	0.018	1		Plscr4	0.162432	0
Adora2a	0.181986	0.573296	0.015	0.01	1		Rnft1	1.879e-09	0.493907	0.125	0.09	3.71422e-05		Tnrc6a	0.16242	0
Ldha	0.0373314	0.573209	0.059	0.039	1		Mrpl52	6.76786e-06	0.493621	0.058	0.04	0.13378		P3h3	0.162414	0
Mycn	0.0311587	0.572399	0.015	0.009	1		Slx4	0.0859775	0.493355	0.023	0.018	1		Ago2	0.162225	0
Hdac3	0.0204123	0.5723	0.045	0.028	1		Stk32b	0.00141901	0.49328	0.041	0.03	1		Arhgef10	0.160634	0
Ghdc	0.19454	0.57099	0.018	0.012	1		Ifi27l2a	0.000831733	0.493109	0.043	0.031	1		Ifngr1	0.159786	0
Zfp276	5.68863e-05	0.570926	0.04	0.02	1		Atpif1	1.0214e-05	0.491328	0.082	0.061	0.201901		Ep300	0.159303	0
Sfxn3	0.000160738	0.57061	0.052	0.031	1		Psme2	0.000933776	0.490945	0.035	0.024	1		Plekha6	0.159249	0
Zscan18	0.19191	0.569997	0.016	0.009	1		Pkd2l2	0.000643637	0.489556	0.031	0.021	1		Tulp4	0.158158	0
Arfgap2	0.000826092	0.569967	0.054	0.029	1		Mrpl19	0.0757915	0.489372	0.015	0.011	1		Fbxl7	0.157758	0
Vars	0.0111453	0.56972	0.042	0.027	1		Pgpep1l	4.4854e-05	0.489276	0.038	0.024	0.88663		Tln1	0.157459	0.328573
Frmd4b	5.05033e-40	0.569542	0.422	0.273	9.98298e-36		Rps7	4.50929e-05	0.489045	0.068	0.05	0.891351		Antxr1	0.157176	0
Pdcd2	0.220426	0.569482	0.013	0.009	1		Cox11	2.24655e-07	0.489026	0.074	0.05	0.00444076		Ubxn4	0.156772	0
Hmgn1	0.000893203	0.568756	0.045	0.026	1		Mfap5	5.75427e-15	0.488701	0.298	0.237	1.13745e-10		Pcnx	0.156502	0
Abca7	2.55693e-05	0.568648	0.035	0.017	0.505427		Vwc2	4.68253e-05	0.488677	0.025	0.014	0.925595		Dennd4a	0.156479	0
Dcaf11	0.802356	0.568535	0.015	0.007	1		Dnaaf2	0.0447564	0.488484	0.012	0.008	1		Dpp8	0.156376	0
Creg1	0.765346	0.568459	0.018	0.009	1		Cox5b	2.73696e-06	0.488251	0.064	0.043	0.0541015		Kdm7a	0.156278	0
Lap3	0.0245395	0.568419	0.029	0.014	1		Thap7	0.143159	0.487675	0.019	0.015	1		Chd8	0.155621	0
Gnb2	1.16404e-10	0.566775	0.06	0.03	2.30096e-06		Ak4	0.00860641	0.487598	0.017	0.011	1		Zfc3h1	0.15523	0
Zswim6	2.47139e-30	0.566371	0.228	0.12	4.88521e-26		Zbtb24	0.000272181	0.487538	0.056	0.041	1		Tcf7l2	0.154876	0
Rpl3	4.51489e-05	0.564676	0.044	0.026	0.892458		Alg2	7.46339e-05	0.487288	0.058	0.041	1		Ctnnd1	0.154751	0
Pole3	0.228551	0.563679	0.01	0.006	1		Rrp8	0.00010598	0.486895	0.042	0.028	1		Papola	0.154744	0
Npr2	5.43691e-10	0.563412	0.113	0.064	1.07471e-05		Arl10	0.000396682	0.486665	0.052	0.038	1		Ap2a2	0.154652	0
Lrrc8c	3.49925e-16	0.563327	0.175	0.105	6.91698e-12		Junb	4.0738e-42	0.486661	0.678	0.577	8.05269e-38		Flna	0.154388	0
Cd200r1	0.0211519	0.562273	0.01	0.006	1		Eya4	7.84746e-05	0.486187	0.06	0.044	1		Arih1	0.153853	0
Arrb2	0.0816676	0.560594	0.018	0.011	1		R3hcc1	0.0394759	0.48615	0.016	0.012	1		Pi4ka	0.153825	0
Flrt2	2.7577e-12	0.560492	0.194	0.134	5.45114e-08		Lrrc29	0.000225543	0.486107	0.047	0.033	1		Trpm7	0.153618	0
Fam227a	0.00132084	0.559427	0.034	0.019	1		Llgl1	4.48438e-05	0.485715	0.048	0.033	0.886427		Ubl3	0.153163	0
Vps11	6.36609e-05	0.558601	0.071	0.038	1		Pnrc2	0.0717774	0.485528	0.03	0.025	1		Chd9	0.152882	0.102986
Kptn	0.0994715	0.558379	0.032	0.015	1		Rgs19	0.0194487	0.485223	0.011	0.007	1		Fam102b	0.15228	0
Atxn7l3	0.000574444	0.557636	0.03	0.015	1		Rps6	0.000165828	0.485016	0.061	0.045	1		Pdcd11	0.151607	0
Bcl7b	5.86211e-07	0.557334	0.052	0.03	0.0115876		Cnbd2	9.46865e-06	0.48413	0.068	0.048	0.187167		Cers5	0.150439	0
Sidt2	8.62319e-09	0.556607	0.101	0.058	0.000170455		Lysmd3	6.68808e-06	0.483492	0.083	0.061	0.132203		Plekhh2	0.150343	0.28326
C2cd2l	0.550869	0.556179	0.01	0.006	1		Khsrp	1.13953e-09	0.483479	0.135	0.098	2.2525e-05		Dennd5a	0.149339	0
Slc44a2	1.55376e-11	0.555477	0.118	0.068	3.07131e-07		Map1lc3b	4.67936e-05	0.483317	0.081	0.061	0.92497		Dstyk	0.148457	0
Vasn	0.023517	0.555371	0.016	0.009	1		Cog8	4.93224e-05	0.483239	0.055	0.038	0.974955		Tbl1xr1	0.147035	0
Olfml2b	0.0428019	0.555102	0.03	0.015	1		Cep68	6.7879e-11	0.482898	0.173	0.129	1.34176e-06		Brd4	0.146566	0
Phactr4	6.39405e-27	0.554551	0.269	0.165	1.26391e-22		Abhd8	0.0264305	0.482672	0.019	0.014	1		Ccbe1	0.146389	0
Nfatc2ip	0.0524704	0.554315	0.016	0.01	1		Rpl13	1.74776e-10	0.482581	0.146	0.106	3.45479e-06		Sipa1l3	0.146242	0
Wbp1	0.128673	0.554027	0.025	0.014	1		Emc9	0.000842257	0.482497	0.041	0.029	1		Prr14l	0.145867	0
Snrk	2.48423e-26	0.553784	0.319	0.21	4.91059e-22		Plekhj1	0.000434121	0.482445	0.048	0.035	1		Ldlrad4	0.145699	0
Coq5	0.0086022	0.552734	0.053	0.031	1		Fbn2	0.000545698	0.482397	0.09	0.072	1		Tspan9	0.145638	0
Wdr13	0.00768883	0.552205	0.043	0.023	1		Cox14	0.0009423	0.481523	0.029	0.019	1		Hdac8	0.145168	0
Tsr3	0.0588093	0.551675	0.022	0.013	1		Mrpl12	0.0611165	0.481312	0.021	0.016	1		Mad1l1	0.144438	0
Oxnad1	0.000179195	0.550953	0.064	0.04	1		Mss51	0.000128171	0.481223	0.055	0.039	1		Sfswap	0.144427	0
Prex1	3.10661e-10	0.550242	0.105	0.063	6.14084e-06		Hspb6	0.000171322	0.481006	0.032	0.02	1		P2rx4	0.1442	0
Adcy4	0.00847612	0.550051	0.028	0.016	1		Enpp1	1.29615e-08	0.480876	0.087	0.059	0.00025621		Ddx50	0.143147	0.429985
Psmd8	0.00116184	0.549734	0.04	0.024	1		Cfp	0.0069227	0.480094	0.026	0.019	1		Il16	0.142538	0
Tbx20	4.63858e-32	0.548806	0.575	0.436	9.16907e-28		Fam71d	0.152193	0.479814	0.01	0.007	1		Galnt10	0.142333	0
Tjap1	7.19045e-06	0.548309	0.079	0.044	0.142134		Mtmr11	2.45412e-07	0.479751	0.062	0.04	0.00485105		Tns3	0.142046	0
Rpl35	0.000251533	0.547936	0.024	0.013	1		Rps20	2.17443e-09	0.479371	0.118	0.084	4.2982e-05		Cbx6	0.141622	0
Nup50	4.71362e-08	0.546477	0.08	0.043	0.000931741		Adprhl1	0.00150713	0.479284	0.03	0.021	1		Wdr26	0.140982	0
Synj2	1.56309e-06	0.546349	0.114	0.072	0.0308976		Gpatch11	0.0261098	0.479251	0.03	0.023	1		Dst	0.140126	0
Homer1	0.0818408	0.545949	0.018	0.01	1		Rhbdf1	1.21147e-07	0.479204	0.099	0.071	0.00239471		Pbx1	0.140067	0
Pnpla2	0.693307	0.545896	0.011	0.007	1		Lsm5	0.0121666	0.478926	0.023	0.016	1		Ywhaz	0.138874	0
Pam16	0.0122649	0.544558	0.03	0.018	1		Sc5d	5.79282e-05	0.478825	0.039	0.026	1		Zfhx3	0.138449	0
Nr2c2ap	0.0881061	0.54431	0.029	0.021	1		Thy1	0.026894	0.478759	0.013	0.008	1		Klc1	0.138119	0
Klf9	4.93468e-45	0.544299	0.484	0.324	9.75439e-41		Tcf21	7.34796e-05	0.477902	0.074	0.055	1		Fyn	0.137971	0
Gba2	0.000734028	0.54414	0.034	0.019	1		Ubl4a	0.00202903	0.477795	0.021	0.013	1		Taok3	0.137643	0
Cilp	4.63853e-05	0.543281	0.03	0.016	0.916898		Psma7	0.000152257	0.477778	0.066	0.049	1		Arhgef3	0.137627	-0.363158
Jdp2	2.08447e-12	0.541305	0.121	0.076	4.12038e-08		Slc19a2	0.0191305	0.477526	0.021	0.015	1		Bbs9	0.13593	0
Emilin2	1.93193e-05	0.5409	0.067	0.044	0.381885		Tsc22d4	3.3139e-15	0.477508	0.22	0.162	6.55059e-11		Cmklr1	0.135839	0
Tmem132c	0.00156238	0.540771	0.026	0.015	1		Serf2	6.01802e-13	0.477077	0.16	0.113	1.18958e-08		Wwp1	0.135787	0
Gabpa	0.00485282	0.540553	0.047	0.025	1		Fam32a	0.00675623	0.47672	0.025	0.018	1		Tnks2	0.135756	0
Nt5m	0.000217104	0.540527	0.056	0.031	1		Cys1	7.64679e-15	0.476548	0.228	0.17	1.51154e-10		Pbx3	0.135312	0
Pla1a	2.07162e-25	0.54052	0.273	0.173	4.09497e-21		Slbp	6.84661e-07	0.476448	0.091	0.066	0.0135337		Fbxw11	0.134836	0
Txndc17	0.0817317	0.540363	0.035	0.025	1		Atp6v0b	8.87832e-27	0.476136	0.327	0.235	1.75498e-22		Arid1a	0.134778	0
Mrps34	0.0971187	0.540104	0.013	0.008	1		Mmp23	7.80374e-11	0.476129	0.147	0.106	1.54257e-06		Itgb1	0.134311	0
Pnn	4.62824e-10	0.539074	0.13	0.076	9.14864e-06		Chchd1	0.000461748	0.47535	0.049	0.035	1		Gnb1	0.134242	0
Rfx5	0.00338843	0.538446	0.03	0.016	1		Rraga	0.00595376	0.475134	0.02	0.013	1		Trak1	0.134019	0
Sh2b3	1.28063e-08	0.53817	0.072	0.035	0.000253142		Gas2l1	0.000171044	0.475008	0.054	0.039	1		Abcc5	0.133186	0
Ctnna1	1.18678e-14	0.538167	0.203	0.112	2.34591e-10		Sec22c	0.00373419	0.474841	0.027	0.019	1		Spred2	0.132944	0
Golm1	0.0313864	0.537618	0.017	0.011	1		Fam184a	0.00192092	0.474793	0.03	0.021	1		Srek1	0.132892	0
Zfp592	8.62088e-35	0.536985	0.448	0.301	1.70409e-30		Cbwd1	1.86747e-07	0.474482	0.088	0.061	0.00369143		Trim33	0.132656	0
Naa60	1.34257e-07	0.536406	0.057	0.03	0.00265385		Extl2	0.00310831	0.474455	0.022	0.014	1		Ctif	0.132652	0
Azin1	2.0387e-10	0.534443	0.118	0.069	4.02991e-06		Mthfd1l	6.08823e-09	0.474199	0.131	0.095	0.000120346		Zfp609	0.132493	0
Pglyrp1	0.0243906	0.53366	0.013	0.007	1		C1qa	0.0592145	0.473283	0.011	0.007	1		Ahctf1	0.13229	0.293284
Ctsk	0.0592859	0.533351	0.018	0.012	1		Cox6b1	0.000172381	0.47325	0.07	0.053	1		Paxbp1	0.1321	0
Orai1	1.16629e-06	0.5332	0.064	0.038	0.023054		Ndufb11	0.000753915	0.472414	0.036	0.025	1		Dennd2a	0.13206	0
Dpf2	0.000364051	0.533094	0.075	0.043	1		Fam171a2	0.00382662	0.472395	0.024	0.016	1		Magi2	0.132019	0
Rcsd1	1.15899e-11	0.532826	0.157	0.087	2.29097e-07		Stip1	0.000847185	0.471954	0.053	0.039	1		Atg3	0.132008	0
Rtkn2	0.00224981	0.532482	0.015	0.008	1		Kcnk2	1.5394e-13	0.471595	0.331	0.273	3.04293e-09		Bmpr2	0.131957	0
Cers2	2.26625e-07	0.532067	0.086	0.046	0.00447969		Plk4	0.0904823	0.471369	0.024	0.02	1		Ewsr1	0.131677	0
Chrac1	0.414648	0.531657	0.025	0.019	1		S100a6	1.89845e-16	0.471097	0.231	0.169	3.75266e-12		Zfp704	0.131208	0
Mrpl15	0.00508593	0.5307	0.049	0.03	1		Pdxk	7.87224e-06	0.471055	0.055	0.037	0.15561		Ddx17	0.130877	0
Slc27a4	0.0912498	0.530067	0.029	0.016	1		Rnase4	4.05293e-08	0.471023	0.14	0.107	0.000801142		Stim2	0.130459	0
Mrto4	0.0247455	0.530052	0.015	0.008	1		Dnlz	0.0287844	0.470544	0.02	0.014	1		Lrp6	0.130344	0
Avil	0.000660303	0.529579	0.028	0.015	1		Aplf	0.0216686	0.47027	0.027	0.021	1		Vps13a	0.130178	0
Cfap69	0.0783257	0.527214	0.01	0.007	1		Zfp955b	0.000700759	0.469965	0.044	0.032	1		Top1	0.128908	0.229487
Nckipsd	0.0253788	0.526475	0.025	0.011	1		Dsel	3.62198e-08	0.468892	0.099	0.069	0.000715957		Fcho2	0.128562	0
Zfp729a	0.0310088	0.525647	0.027	0.014	1		Adamtsl4	7.09098e-09	0.468265	0.083	0.055	0.000140167		Asap1	0.128361	0
Hacl1	0.000593921	0.525144	0.033	0.02	1		Tcp1	7.19512e-07	0.468112	0.093	0.068	0.0142226		Parva	0.128158	0
Shank2	0.00750792	0.52494	0.027	0.019	1		Igsf8	7.6823e-07	0.467738	0.073	0.05	0.0151856		Robo1	0.127857	0
Taf6	0.000364978	0.524632	0.06	0.033	1		Dnaja1	6.61623e-11	0.466619	0.189	0.143	1.30783e-06		Nsd1	0.127705	0
Otud4	7.56055e-11	0.524553	0.149	0.09	1.49449e-06		Lzic	0.00252588	0.466449	0.044	0.033	1		Gpbp1	0.127588	0
Vav2	8.77201e-12	0.524043	0.147	0.09	1.73396e-07		Ptprf	0.00537845	0.466388	0.049	0.038	1		Atf7	0.12731	0
Anapc16	1.93035e-10	0.523933	0.143	0.09	3.81573e-06		Ncbp2	7.12568e-05	0.466228	0.05	0.035	1		Ccar1	0.126171	0
Mfap5	1.28978e-26	0.523316	0.392	0.269	2.54951e-22		Gcdh	0.0290854	0.466171	0.021	0.015	1		Celf2	0.125587	0
Prkcz	4.63444e-07	0.522857	0.041	0.022	0.00916089		Sgtb	0.00259383	0.46616	0.041	0.03	1		Herc2	0.125269	0
Med10	0.266617	0.522498	0.016	0.011	1		Zcchc3	0.025775	0.466073	0.023	0.017	1		Pld1	0.12515	0
Snrpf	1.53522e-05	0.522454	0.047	0.026	0.303467		Brf2	0.0678589	0.465871	0.012	0.009	1		Ankib1	0.125045	0
Sipa1l1	2.32707e-08	0.521072	0.148	0.091	0.000459993		Psph	0.0991844	0.465316	0.021	0.017	1		Kif5b	0.124516	0
Ncapd2	0.0200912	0.521034	0.01	0.005	1		Ap1g2	0.0115554	0.465269	0.021	0.014	1		Iqgap1	0.123944	0
Rpl34	0.0216672	0.520568	0.031	0.021	1		Sirt7	4.50695e-06	0.464672	0.085	0.062	0.0890889		Rapgef2	0.123127	-0.199393
Zfp787	0.00353597	0.52054	0.048	0.029	1		Proser1	1.40622e-05	0.464505	0.075	0.055	0.277967		Ndel1	0.123052	0
Sord	0.000102055	0.519807	0.035	0.022	1		Ap2s1	0.00664772	0.464421	0.035	0.026	1		Plce1	0.122596	0
Cd80	0.000553755	0.518838	0.032	0.02	1		Atp5g1	0.000781322	0.464341	0.064	0.05	1		G3bp1	0.121489	0
Chd1l	0.016646	0.518361	0.045	0.028	1		Ntrk3	2.74616e-06	0.463967	0.063	0.043	0.0542833		Smg6	0.121091	0
Wdr62	0.000802435	0.518244	0.013	0.008	1		Zdhhc24	0.0181413	0.463121	0.032	0.025	1		Spaca6	0.120999	0
Pxn	2.32493e-15	0.518064	0.194	0.114	4.59568e-11		Amacr	0.0208277	0.462572	0.014	0.01	1		Nadk	0.120489	0
Slc35e2	0.023877	0.517138	0.05	0.027	1		Cdc42ep5	3.22149e-06	0.462386	0.102	0.077	0.0636791		Ski	0.120454	0
Dnal4	0.958936	0.515636	0.015	0.007	1		Nqo1	0.351484	0.461759	0.013	0.011	1		Shoc2	0.120304	0
Dyrk2	0.0115615	0.515629	0.038	0.022	1		Gpx1	0.00516627	0.461741	0.035	0.026	1		Ell	0.119941	0
Clip3	1.99484e-05	0.514675	0.084	0.055	0.394319		Trappc2l	0.00837275	0.461264	0.022	0.015	1		Rai1	0.119633	0
Phb2	0.136747	0.514551	0.022	0.013	1		Zfp692	5.42898e-08	0.461205	0.084	0.058	0.00107315		Ttc17	0.119512	0
Asna1	0.0496814	0.514459	0.016	0.009	1		Mrps30	0.0182656	0.460903	0.023	0.016	1		Gtf3c2	0.119103	0
Zbtb7b	0.00635029	0.514116	0.023	0.014	1		Atox1	0.000518967	0.460777	0.053	0.039	1		Arhgef11	0.119091	0
Tma7	0.0745063	0.512896	0.03	0.021	1		Pnrc1	2.83545e-08	0.460661	0.139	0.105	0.000560483		Txndc11	0.118974	0
H2-M3	0.833293	0.512713	0.01	0.007	1		Ipo4	0.00051433	0.460561	0.05	0.037	1		Kat6a	0.118661	0
Ankrd6	3.19285e-12	0.512575	0.126	0.076	6.31131e-08		Pycr2	0.000371913	0.460433	0.024	0.015	1		Srpk2	0.117311	0
Ppia	5.60553e-07	0.512235	0.103	0.062	0.0110804		Zcchc9	2.4648e-08	0.460192	0.099	0.069	0.000487218		Pde10a	0.11625	0
Cmtm7	2.54644e-08	0.512078	0.125	0.08	0.000503355		Rps29	2.53822e-08	0.460072	0.119	0.087	0.00050173		Med15	0.115994	0
Dusp22	0.00019936	0.511502	0.048	0.029	1		Tyms	0.0295082	0.459856	0.037	0.03	1		Ror2	0.115205	0
Arpc4	4.53458e-05	0.511334	0.05	0.028	0.89635		Eaf2	0.00191162	0.459742	0.051	0.038	1		Kpna4	0.115189	0.165297
Cyp4f16	0.00946945	0.511069	0.029	0.014	1		Ywhag	6.44764e-09	0.459734	0.139	0.103	0.000127451		Arhgap24	0.114929	-0.253768
Nrbp1	3.40809e-07	0.5108	0.112	0.066	0.00673677		Thoc3	0.0100507	0.459696	0.027	0.02	1		Usp9x	0.114811	0
Sh3tc2	0.000120807	0.510661	0.03	0.016	1		Ahsa2	3.28653e-07	0.459053	0.099	0.072	0.00649648		Osbpl5	0.114482	0
Cfap157	0.386634	0.510638	0.01	0.007	1		Tubg2	0.00840984	0.458747	0.022	0.015	1		Lepr	0.114226	-0.584708
Slc31a2	0.212034	0.510159	0.026	0.016	1		Ier2	2.6768e-42	0.457902	0.676	0.567	5.29124e-38		Gucy1a2	0.11373	0.195148
Cds2	0.000153753	0.510143	0.072	0.049	1		Skp2	0.00355877	0.457535	0.041	0.031	1		Arpc1b	0.113445	0.319641
Ddx5	1.91072e-34	0.510038	0.504	0.342	3.77691e-30		Zfp354a	0.00796894	0.45737	0.022	0.015	1		Pmepa1	0.113438	0
Angptl2	7.67407e-36	0.509925	0.415	0.269	1.51693e-31		Noa1	0.0303728	0.457234	0.02	0.015	1		Prpf38b	0.113367	0
Fam129b	3.65903e-10	0.508837	0.128	0.081	7.23281e-06		Nudt5	2.81794e-07	0.457189	0.111	0.082	0.00557021		Cyb5a	0.113219	0
Gps1	0.00160256	0.508612	0.039	0.022	1		Ift22	0.0175572	0.457155	0.02	0.014	1		Pdpk1	0.112659	0
Atp5o	0.361074	0.508526	0.059	0.048	1		Fam8a1	5.07247e-06	0.457085	0.062	0.043	0.100267		Tom1l2	0.112297	0
Bnip1	0.00195667	0.508146	0.04	0.023	1		Pex11b	0.0386922	0.457062	0.02	0.015	1		Zfr	0.11174	0
Ascl4	0.0768681	0.50798	0.012	0.005	1		Lrrc55	0.0386123	0.457002	0.015	0.01	1		Pten	0.111079	0
Il33	9.32447e-10	0.507335	0.099	0.059	1.84317e-05		Lap3	0.002006	0.456931	0.029	0.02	1		Setbp1	0.110764	0
Psmd6	0.000777095	0.507303	0.036	0.019	1		Rarres2	1.41629e-06	0.456809	0.104	0.078	0.0279959		Abca8a	0.110683	0
Ids	0.0140356	0.506652	0.029	0.018	1		Pofut2	5.95741e-05	0.456146	0.055	0.039	1		Fam219a	0.109974	0
Synpo2	0.0112236	0.506111	0.037	0.015	1		Tufm	0.598411	0.456023	0.011	0.01	1		Rbbp6	0.108992	0
Ankrd12	1.39511e-51	0.505685	0.576	0.392	2.7577e-47		Ubfd1	0.000180481	0.455902	0.054	0.039	1		Rgs17	0.108772	0
Dnlz	0.458568	0.505447	0.013	0.008	1		Pdgfra	2.77017e-35	0.454829	0.671	0.574	5.4758e-31		Rhoq	0.108681	0
Uty	8.21387e-17	0.505083	0.142	0.089	1.62363e-12		Rexo1	7.65784e-09	0.454793	0.12	0.087	0.000151373		Bcas3	0.107316	0
Nudt21	2.13999e-06	0.504694	0.067	0.041	0.0423011		Fgfbp3	0.0258808	0.454024	0.011	0.007	1		Aldh1a1	0.105843	0
Pelo	0.500057	0.504657	0.012	0.007	1		Adprh	0.0180462	0.453295	0.038	0.03	1		Mark3	0.105621	0
Jup	2.35727e-11	0.504558	0.173	0.102	4.65962e-07		Ikbkg	0.000110148	0.453188	0.068	0.051	1		Rock1	0.10555	0.119906
Atpaf2	0.179252	0.504117	0.03	0.018	1		Dcdc2b	0.186996	0.453079	0.024	0.02	1		Magi3	0.104709	0
Ddah1	0.749938	0.50376	0.011	0.008	1		Fam221a	0.154507	0.452994	0.011	0.008	1		Anxa3	0.104616	0
Tle3	1.55444e-15	0.502727	0.171	0.105	3.07265e-11		Aacs	0.00892405	0.451497	0.042	0.033	1		Mbtd1	0.104335	0
Tmem147	0.110025	0.501382	0.023	0.012	1		Pfdn4	0.0990091	0.45148	0.027	0.022	1		Mib1	0.104136	0
Ankrd42	0.0450097	0.500672	0.021	0.014	1		Atp5k	5.55716e-07	0.451377	0.077	0.053	0.0109848		Taok1	0.103958	0
Foxj2	0.0191717	0.500484	0.067	0.038	1		Zfp688	0.0306491	0.451376	0.018	0.013	1		Colec12	0.103917	0.191397
Brd9	7.82922e-09	0.500287	0.12	0.066	0.00015476		Purb	8.97501e-12	0.451022	0.191	0.142	1.77409e-07		Gpatch8	0.103309	0
Actn4	2.20134e-11	0.500118	0.226	0.154	4.35139e-07		Ostc	3.79505e-05	0.450921	0.05	0.034	0.750168		Tshz1	0.102729	0
Prdx6	7.06639e-06	0.500027	0.073	0.041	0.139681		Tbrg1	9.46353e-08	0.450527	0.116	0.085	0.00187066		Greb1l	0.102636	0
Aifm2	0.000956109	0.49988	0.019	0.006	1		Erh	0.00059426	0.449843	0.054	0.04	1		Pag1	0.10259	0
Ccdc107	0.596964	0.498323	0.023	0.012	1		Thap2	2.32842e-09	0.449839	0.114	0.08	4.60259e-05		Rhoa	0.102379	0.191401
Sigmar1	0.00625956	0.498175	0.034	0.019	1		Arfip2	1.17313e-06	0.44937	0.103	0.077	0.0231893		Pogz	0.101541	0
Cdh5	0.00780996	0.497905	0.011	0.005	1		L3mbtl4	0.233315	0.449302	0.011	0.009	1		Btbd9	0.101157	0
Ndrg1	0.019264	0.497834	0.041	0.024	1		Nagk	4.06422e-07	0.449201	0.091	0.065	0.00803374		Reck	0.100382	0
Plk4	0.00529854	0.496484	0.016	0.009	1		Fam177a	1.33878e-06	0.448735	0.076	0.053	0.0264637		Gphn	-0.144293	-0.151626
Cyp46a1	0.0343071	0.496403	0.012	0.006	1		Rpl37a	5.28392e-05	0.448468	0.101	0.079	1		Uqcrq	-0.162299	0
Adck5	0.000361376	0.496194	0.046	0.025	1		Cby1	0.00374506	0.448069	0.022	0.014	1		Rbms3	-0.165018	-0.149714
Mpdu1	0.000125234	0.496168	0.052	0.03	1		Flii	3.52785e-09	0.447973	0.138	0.102	6.97351e-05		Lhfp	-0.187364	-0.148621
Psmc3	0.0147015	0.495857	0.043	0.028	1		Tatdn1	2.05793e-06	0.447855	0.083	0.06	0.0406791		Bicc1	-0.200676	0
Odc1	0.171759	0.495712	0.025	0.016	1		Eml5	0.00113643	0.44782	0.037	0.026	1		Camk1d	-0.248286	-0.375315
Rpl10a	2.65983e-08	0.495605	0.138	0.084	0.000525768		Cops8	1.12794e-06	0.447571	0.094	0.069	0.0222961		Rhoj	-0.25662	-0.174113
Stip1	0.00148721	0.494895	0.06	0.039	1		Gas8	0.196365	0.447565	0.01	0.008	1		Ext1	-0.260017	0
Pwp1	0.0078103	0.494393	0.018	0.009	1		Lyplal1	0.037301	0.447469	0.023	0.017	1		Ddr2	-0.272698	0
Efr3b	0.816541	0.494141	0.018	0.009	1		Taf13	0.000184506	0.447176	0.053	0.038	1		Sgk1	-0.278248	0
Ankrd13b	0.000427613	0.493653	0.031	0.017	1		Ttc9c	4.1517e-05	0.447106	0.07	0.052	0.820666		Arhgap6	-0.287929	0
Cdk2ap2	0.249309	0.493473	0.013	0.008	1		Ndufs8	0.0412434	0.44576	0.018	0.014	1		Gsn	-0.291452	0
Adcy7	1.22669e-27	0.492816	0.403	0.273	2.42479e-23		BC031181	8.54889e-07	0.445697	0.069	0.047	0.0168986		Cfh	-0.301315	-0.177218
Rnpepl1	0.000474648	0.492658	0.078	0.046	1		Pycrl	0.307418	0.444898	0.011	0.009	1		Ankrd1	-0.315581	0.628786
Ggta1	0.251137	0.492512	0.013	0.007	1		Zfp764	0.0799745	0.444811	0.013	0.01	1		Lars2	-0.320249	-0.516468
Mob3b	0.100916	0.492109	0.011	0.008	1		Zscan22	0.000264326	0.444671	0.04	0.027	1		Zeb2	-0.324283	0
Trabd	0.000539166	0.491208	0.063	0.037	1		Polr2l	0.0147333	0.444445	0.023	0.016	1		Abi3bp	-0.338592	0
Zmiz2	0.0495568	0.49045	0.048	0.029	1		Fam131a	4.24829e-05	0.444275	0.05	0.034	0.839759		Bmper	-0.350872	-0.260538
Mbd1	8.0206e-11	0.490367	0.098	0.06	1.58543e-06		Lrrc51	0.000115297	0.444168	0.05	0.035	1		Adamts2	-0.352505	0
Gng8	7.06377e-05	0.490207	0.033	0.019	1		Ttc14	4.50768e-32	0.444134	0.467	0.359	8.91034e-28		Ssh2	-0.362617	-0.274047
Eef2k	2.7947e-14	0.489693	0.144	0.083	5.52427e-10		Ly6a	2.52867e-06	0.444016	0.068	0.047	0.0499842		Lpl	-0.374033	0
Gnpda1	0.368824	0.489595	0.016	0.008	1		Pecr	0.00507293	0.444005	0.04	0.03	1		Ndufb7	-0.380442	0
Actr6	0.0238162	0.489317	0.029	0.018	1		Tubb5	0.00225162	0.44364	0.049	0.037	1		Eda	-0.394217	-0.19462
Pcbp4	0.0825043	0.489287	0.04	0.022	1		Vti1b	6.20713e-12	0.443496	0.166	0.12	1.22696e-07		Ar	-0.437655	0
Mfhas1	5.4046e-09	0.489027	0.103	0.061	0.000106833		Snrpa1	0.00543958	0.443058	0.052	0.041	1		Uqcr11	-0.455034	0
Ahnak2	2.1728e-15	0.489005	0.165	0.104	4.29497e-11		Marveld1	1.77461e-07	0.442871	0.154	0.12	0.00350787		Fbn1	-0.459653	0
Dcp1b	0.00628345	0.488459	0.053	0.027	1		Cx3cl1	0.387879	0.44261	0.019	0.016	1		Pde3a	-0.467008	-0.345654
Tspan18	0.0002257	0.487169	0.081	0.052	1		Lcat	0.00991458	0.442547	0.012	0.007	1		Mgp	-0.475678	0.364684
Atl2	2.47071e-07	0.48627	0.085	0.047	0.00488385		Tnfsf12	0.00992962	0.442231	0.038	0.029	1		Hspa8	-0.484988	0.623957
Hnrnpdl	7.16761e-15	0.485507	0.302	0.189	1.41682e-10		Dctn3	0.0060783	0.44189	0.031	0.022	1		Nr4a1	-0.489029	0
Tinf2	0.0475381	0.485345	0.038	0.025	1		Ankrd54	0.00545083	0.441794	0.036	0.027	1		Col6a3	-0.497215	0
Zfp653	2.39976e-07	0.485145	0.047	0.024	0.00474361		Il12a	0.00255415	0.441146	0.021	0.014	1		Mast4	-0.499133	-0.336579
Zfp12	0.00234894	0.485133	0.033	0.02	1		Card19	0.000461317	0.44111	0.034	0.023	1		Cp	-0.525032	-0.424533
Emg1	0.0156274	0.484174	0.034	0.02	1		Pcdhga3	0.144688	0.440495	0.011	0.008	1		Dcn	-0.552317	0
Camta2	2.6788e-05	0.483547	0.082	0.048	0.529518		Rpl36al	5.51352e-05	0.440392	0.039	0.025	1		Slc25a4	-0.562738	0
Kmt2d	1.11177e-08	0.483428	0.124	0.077	0.000219764		Axin2	0.0255597	0.440227	0.013	0.009	1		Egfr	-0.57885	0
Slc25a11	0.63287	0.483299	0.03	0.023	1		Aste1	0.000436781	0.440077	0.064	0.048	1		Hsp90ab1	-0.619803	0.312146
Arhgef9	0.0497634	0.483266	0.047	0.028	1		Tifa	0.00219877	0.439871	0.049	0.037	1		Calcrl	-0.640252	0
Hdgf	0.00101595	0.482714	0.069	0.041	1		Ptp4a1	1.35206e-08	0.439737	0.184	0.145	0.000267261		Chchd10	-0.652669	0
Pgm2	0.316773	0.482682	0.054	0.031	1		Lin7c	3.50838e-05	0.438899	0.096	0.074	0.693502		Adam19	-0.6532	0
Il15ra	5.21628e-14	0.482351	0.112	0.059	1.0311e-09		Gins1	0.931227	0.438464	0.01	0.01	1		Tpm1	-0.69913	0
Panx1	0.000130249	0.482284	0.042	0.026	1		Man2b1	2.15699e-06	0.438283	0.086	0.062	0.0426373		Camta1	-0.706376	0
Dcdc2b	0.326312	0.482065	0.015	0.007	1		Lmx1b	0.0814807	0.437845	0.014	0.011	1		Clmp	-0.707931	0
Gorasp1	0.0165187	0.481845	0.012	0.006	1		Gapdh	9.4767e-07	0.437822	0.082	0.058	0.0187326		Osmr	-0.715244	0
Pabpc1	9.03935e-11	0.48067	0.139	0.086	1.78681e-06		Ctla2a	0.030299	0.437784	0.022	0.016	1		Hsp90b1	-0.72455	0.26272
Tmem198b	0.000399175	0.480317	0.041	0.022	1		Tbx20	1.59026e-19	0.437749	0.641	0.573	3.14346e-15		Col15a1	-0.725708	0
Car11	0.00405909	0.480279	0.023	0.011	1		Fam57a	0.0124334	0.437123	0.021	0.014	1		Adamts12	-0.737988	0
Htatip2	0.142862	0.480028	0.016	0.013	1		Fbxl13	0.0132205	0.436911	0.026	0.019	1		Cox6a2	-0.74237	0.494473
Podn	5.2656e-27	0.479082	0.295	0.176	1.04085e-22		Rundc3b	0.000131422	0.436794	0.04	0.027	1		Ckm	-0.743212	0
Hnrnpl	1.17855e-11	0.478843	0.128	0.078	2.32964e-07		Eid2	0.551322	0.435677	0.01	0.009	1		Col6a6	-0.751864	-0.326396
Adgre5	9.60631e-16	0.478705	0.209	0.132	1.89888e-11		Ccdc102a	0.00035221	0.435661	0.054	0.04	1		Hbb-bs	-0.764695	0.20793
Myh9	8.54057e-23	0.478577	0.286	0.182	1.68821e-18		Fkrp	0.00224145	0.435242	0.023	0.015	1		Hba-a2	-0.782475	0
Tmtc1	1.95367e-38	0.478507	0.489	0.342	3.86181e-34		Aebp1	8.03123e-09	0.435067	0.127	0.093	0.000158753		Eln	-0.793948	0
Proca1	0.278309	0.478258	0.019	0.011	1		Vat1	0.016739	0.434134	0.033	0.025	1		Aldh1a2	-0.80291	0.80166
Zfyve28	9.89032e-06	0.478186	0.064	0.041	0.195502		Zfp825	0.0043394	0.434021	0.03	0.021	1		Atp5e	-0.841143	0
Fgfr2	1.47572e-17	0.477987	0.316	0.188	2.91705e-13		Tbc1d20	1.02664e-07	0.433755	0.113	0.083	0.00202935		Hba-a1	-0.853241	0
Pdlim7	1.08352e-14	0.477764	0.263	0.166	2.1418e-10		Il33	0.005858	0.433246	0.093	0.079	1		Col3a1	-0.856889	0.242164
Il3ra	0.00181493	0.477554	0.02	0.012	1		Fbxl14	0.0304964	0.433229	0.015	0.01	1		Rhobtb1	-0.882778	0
Cnn3	2.18589e-11	0.47741	0.154	0.096	4.32084e-07		Zfp770	0.0257447	0.433219	0.029	0.022	1		Atf5	-0.883068	0
Lgi4	1.12236e-06	0.476792	0.05	0.029	0.0221856		Bloc1s1	0.100381	0.43321	0.014	0.011	1		Creb3l1	-0.884163	0
Fat1	1.14108e-17	0.476186	0.31	0.211	2.25556e-13		Bmp2	0.000176387	0.433045	0.033	0.021	1		Fbn2	-0.91063	0
Samd1	0.0453693	0.475749	0.018	0.011	1		Ctsk	0.00481785	0.432853	0.025	0.018	1		Fbln1	-0.919715	0
Clk1	6.94895e-20	0.475035	0.244	0.164	1.3736e-15		Slc38a4	0.0337813	0.432736	0.023	0.018	1		Pappa	-0.922528	-0.404241
Dnajb9	0.738625	0.475007	0.011	0.008	1		Mest	0.571565	0.432498	0.015	0.014	1		Atp5b	-0.925029	0.28906
Gpr161	2.70034e-05	0.474788	0.053	0.033	0.533776		Ing1	0.00457176	0.432449	0.029	0.021	1		Atp5g3	-0.927064	0
Engase	0.0102748	0.474495	0.016	0.009	1		Pin4	0.0490823	0.432267	0.017	0.013	1		Cox6b1	-0.930832	0
Trpm4	5.98718e-05	0.474271	0.052	0.028	1		Atp5j2	2.89339e-08	0.431768	0.095	0.066	0.000571937		Myo3a	-0.938381	0
Aph1a	0.0892489	0.473098	0.016	0.01	1		Zfp595	0.0762035	0.431607	0.026	0.021	1		Rassf2	-0.952436	0
Fbxl6	0.00186369	0.47295	0.03	0.017	1		Serpinh1	0.000105688	0.431467	0.112	0.09	1		Unc5c	-0.975422	0
Tns2	6.45423e-20	0.47267	0.239	0.153	1.27581e-15		Gpr137	0.135549	0.431241	0.017	0.013	1		Zfp36l1	-0.979831	0.545763
Adam1a	0.00173499	0.472431	0.019	0.01	1		Psmg1	0.0434206	0.430382	0.025	0.019	1		Pgam2	-0.982274	0
Gas6	2.61008e-08	0.472203	0.139	0.088	0.000515934		Tomm7	0.000512907	0.430225	0.029	0.018	1		Sh3pxd2b	-1.06591	0
Il18bp	0.425528	0.471954	0.01	0.006	1		Ddx50	1.84559e-26	0.429985	0.442	0.347	3.64818e-22		Rnf144a	-1.07635	0
Synj2bp	1.00412e-09	0.471672	0.095	0.054	1.98485e-05		Nfe2l2	3.77304e-19	0.429842	0.343	0.267	7.45817e-15		Ldlr	-1.13607	0.715763
Qpctl	0.212022	0.47122	0.017	0.011	1		Tnfrsf1a	0.000186387	0.429832	0.065	0.049	1		Mmp14	-1.15331	0
Lman2l	0.030981	0.470997	0.027	0.014	1		Serp1	0.000511857	0.429646	0.049	0.036	1		Apoe	-1.16504	0
Arhgap44	0.00639586	0.470359	0.051	0.029	1		Maged2	0.00303821	0.429372	0.031	0.022	1		Fgf7	-1.17939	0
Stk39	4.76448e-17	0.469269	0.242	0.151	9.41795e-13		Stard5	2.86378e-11	0.42895	0.157	0.113	5.66084e-07		Spon2	-1.26308	0
Hgs	0.000441417	0.468482	0.032	0.019	1		Tmem263	2.12726e-07	0.428876	0.109	0.08	0.00420495		Bcl3	-1.30816	0
Cox10	0.0914158	0.46828	0.034	0.017	1		Iglon5	0.102751	0.42883	0.011	0.008	1		Hspa5	-1.33673	0
Tom1l1	0.192193	0.467134	0.019	0.01	1		Smim13	2.03778e-05	0.428607	0.074	0.054	0.402808		Gpcpd1	-1.33833	0
Daglb	8.59862e-06	0.466918	0.064	0.04	0.169969		Pgrmc1	0.00310277	0.428214	0.037	0.027	1		Cxcl14	-1.33971	0
Lmf1	0.00367607	0.466161	0.061	0.034	1		Slc35e1	0.0117608	0.427712	0.028	0.02	1		C3	-1.39065	0
Srsf1	0.000518571	0.465679	0.125	0.078	1		Cox6c	7.0356e-08	0.42771	0.143	0.109	0.00139073		Calr	-1.42214	0
Tuba1b	0.325761	0.465611	0.025	0.015	1		Rpl24	1.26471e-05	0.427674	0.084	0.062	0.249995		Mb	-1.42313	0
Lzic	0.200131	0.465581	0.028	0.017	1		Arpc5	1.078e-09	0.427481	0.119	0.084	2.13089e-05		Eef1a2	-1.44886	0
Tmem14c	0.241718	0.46539	0.017	0.009	1		Mrgbp	0.000507827	0.427478	0.045	0.032	1		Dapk1	-1.46251	-0.358952
Sdc3	0.000340513	0.464287	0.053	0.034	1		Hnrnpdl	2.35076e-27	0.427469	0.406	0.308	4.64674e-23		Cfap46	-1.50282	0
Tctn3	0.00234391	0.464224	0.031	0.017	1		Sprtn	0.0245699	0.427284	0.022	0.016	1		Rpl9-ps6	-1.53326	0
Prox2	0.00684902	0.463719	0.036	0.021	1		Scand1	0.0122974	0.426867	0.041	0.033	1		Ech1	-1.69884	0
Tmem126a	0.00508986	0.463364	0.098	0.062	1		Ndufa1	0.0185412	0.426839	0.026	0.019	1		Myl3	-1.76948	0
Atp5g1	2.99148e-05	0.46297	0.068	0.067	0.591325		Rnaseh2a	0.00149158	0.426442	0.045	0.034	1		Cox5a	-2.03804	0
Plxna1	0.036748	0.462863	0.044	0.03	1		Pam16	0.00184392	0.426414	0.042	0.031	1		Tuba4a	-2.30618	0
Gpr155	0.00028397	0.461779	0.049	0.03	1		Hnrnpa2b1	9.89133e-41	0.426256	0.629	0.513	1.95522e-36		Arntl	-2.3483	0
Lrch1	1.05383e-06	0.461341	0.125	0.07	0.020831		Zfp955a	0.000794808	0.426103	0.034	0.023	1		Fabp3	-2.3674	0
Taldo1	0.641438	0.461214	0.026	0.015	1		Dact2	0.0137923	0.425924	0.012	0.007	1		Myl2	-2.58653	0
Tnfsf13b	0.0131569	0.461193	0.028	0.016	1		Lrrc4b	0.148606	0.42502	0.011	0.008	1		Npas2	-2.77465	0
Spns2	0.000901347	0.460829	0.024	0.015	1		Crnkl1	0.00363936	0.424962	0.053	0.041	1		Tnni3	-2.90017	0
Cacnb3	0.0264828	0.460594	0.022	0.015	1		Id2	0.00138497	0.424825	0.046	0.034	1		Idh2	-2.99635	0
Rbfa	0.200334	0.460453	0.015	0.01	1		Hoxb3	0.00845405	0.42448	0.01	0.006	1		Cryab	-3.06606	0.723687
Abhd18	0.0211545	0.460296	0.084	0.049	1		Homez	0.365943	0.424455	0.013	0.011	1		Htr2b	0	1.83694
Zgpat	0.0219248	0.46024	0.04	0.023	1		Uprt	0.0123977	0.424373	0.024	0.017	1		Ccr9	0	1.65632
Dynlrb1	0.0999105	0.459959	0.041	0.026	1		Det1	0.0240923	0.424338	0.032	0.025	1		Trim43c	0	1.63396
Slco3a1	8.69953e-23	0.459614	0.396	0.269	1.71964e-18		Mrpl32	0.0876413	0.423664	0.026	0.021	1		Kcnj13	0	1.5751
Mta1	5.72402e-06	0.459205	0.096	0.061	0.113147		Prr14	1.60361e-16	0.423097	0.185	0.127	3.16986e-12		Ascl4	0	1.53383
Apba2	2.53944e-11	0.458941	0.168	0.115	5.01972e-07		Cntnap1	0.0394723	0.422382	0.03	0.023	1		Pold4	0	1.47699
Iigp1	0.282776	0.458827	0.037	0.027	1		Hist1h1c	0.00024965	0.422296	0.067	0.05	1		Mrps34	0	1.46401
Raly	0.0504742	0.458627	0.013	0.007	1		Gas1	9.68532e-13	0.422093	0.26	0.203	1.9145e-08		Hpgds	0	1.4218
Hmox2	0.015298	0.458453	0.059	0.037	1		Cactin	0.00890953	0.422055	0.028	0.02	1		Mettl23	0	1.40929
Dmxl2	0.000406475	0.458341	0.084	0.05	1		Rps3	0.00414898	0.421893	0.044	0.033	1		B3galt2	0	1.39737
Eva1b	8.13005e-07	0.458004	0.081	0.049	0.0160707		Actr8	0.00198858	0.421007	0.073	0.059	1		Prr33	0	1.295
Zfp647	0.00698456	0.457959	0.021	0.013	1		Dvl2	0.0323027	0.420953	0.029	0.023	1		Glp2r	0	1.28926
Dmap1	0.256032	0.45779	0.017	0.01	1		Ccnj	0.00397331	0.420838	0.026	0.018	1		Clvs1	0	1.28908
Pdxk	9.32678e-07	0.457614	0.042	0.023	0.0184362		Mrps17	2.04082e-06	0.420593	0.068	0.047	0.0403409		Rec114	0	1.26345
Spta1	1.85132e-07	0.45752	0.082	0.047	0.0036595		Akirin1	4.79434e-05	0.42043	0.079	0.06	0.947696		Skida1	0	1.25556
Hecw1	2.99772e-08	0.457482	0.072	0.042	0.000592559		Med10	0.0707361	0.420395	0.019	0.015	1		Ubb	0	1.24577
Klhl18	5.73133e-07	0.457344	0.089	0.058	0.0113291		Sharpin	0.000149931	0.420352	0.047	0.033	1		Star	0	1.24511
Zgrf1	0.000239993	0.457087	0.033	0.019	1		Coa7	0.0919086	0.419539	0.023	0.019	1		Angptl3	0	1.24262
Rhobtb2	0.00249935	0.45646	0.037	0.024	1		Sh2b1	0.0155555	0.419411	0.05	0.04	1		Rnaseh2c	0	1.20842
Midn	1.45312e-07	0.455864	0.047	0.033	0.00287239		Csf2ra	0.00574276	0.418967	0.032	0.023	1		Uchl4	0	1.20421
Spag1	0.0825761	0.455762	0.034	0.021	1		Smc2	0.00392694	0.41864	0.028	0.02	1		Egr3	0	1.19536
Cpsf4l	0.492722	0.455366	0.015	0.009	1		Adgre5	2.91105e-10	0.418438	0.24	0.192	5.75428e-06		Kctd4	0	1.18887
Smarcd1	0.616858	0.454873	0.031	0.015	1		Thbs3	1.71839e-05	0.418402	0.093	0.071	0.339673		Amelx	0	1.17685
Edc4	7.89186e-05	0.454107	0.057	0.034	1		Fuz	0.00178679	0.41825	0.044	0.032	1		Prl2c3	0	1.17389
Adprm	0.208751	0.453904	0.031	0.019	1		Cfl1	2.91969e-06	0.418213	0.094	0.069	0.0577136		Socs3	0	1.1664
Tfdp2	6.59051e-19	0.453899	0.142	0.086	1.30275e-14		Fut11	0.00763766	0.417942	0.041	0.031	1		Ssna1	0	1.16107
Vsir	0.0471975	0.453498	0.022	0.016	1		Txndc15	0.000166481	0.417267	0.082	0.064	1		Mrpl55	0	1.15508
Glul	6.00806e-05	0.45325	0.075	0.046	1		Ubxn6	0.00196859	0.417065	0.045	0.034	1		Ccdc152	0	1.15154
Kdm5d	0.00172265	0.453184	0.055	0.037	1		Pcna	0.0063926	0.417049	0.028	0.02	1		Gadd45g	0	1.15149
Rab4a	0.0137219	0.453128	0.014	0.008	1		Ppp1r10	1.9003e-19	0.416211	0.381	0.302	3.75633e-15		Abra	0	1.14867
Dync1li1	4.64721e-09	0.452783	0.16	0.102	9.18615e-05		Rpl18	3.98261e-05	0.415833	0.079	0.059	0.787243		Stx19	0	1.14819
Adarb1	9.41289e-17	0.452509	0.215	0.14	1.86065e-12		Ptms	7.36313e-07	0.415721	0.153	0.121	0.0145547		Fam122a	0	1.13686
Sppl2b	0.035113	0.451116	0.027	0.016	1		Pstk	1.17149e-07	0.415712	0.084	0.058	0.00231568		Orc1	0	1.12148
Gtf2h3	0.953272	0.450342	0.016	0.009	1		Spsb3	0.0959353	0.415345	0.037	0.031	1		Nupr1	0	1.11562
S100a10	2.57148e-08	0.449782	0.128	0.083	0.000508305		Actr1b	1.02141e-05	0.415016	0.074	0.054	0.201902		Tmem100	0	1.10786
Slc25a22	0.222449	0.449437	0.011	0.005	1		Spred3	0.0027713	0.414943	0.038	0.028	1		Dnajc25	0	1.10389
Pttg1	0.830019	0.449273	0.026	0.02	1		Plxna3	0.0740903	0.414791	0.015	0.011	1		Gng8	0	1.10111
Dlgap1	0.0728693	0.448683	0.019	0.011	1		Fdx1	0.0145762	0.414623	0.033	0.026	1		Pycard	0	1.09636
Npm1	0.000115017	0.448566	0.069	0.045	1		Car11	0.0260889	0.414605	0.023	0.017	1		Klf10	0	1.09181
Ddx49	0.000694071	0.448384	0.037	0.024	1		Rps9	7.17087e-08	0.414359	0.126	0.094	0.00141747		Aurkaip1	0	1.08439
Efna2	0.0899209	0.448289	0.01	0.006	1		Akap5	0.226116	0.414291	0.01	0.008	1		Tmem258	0	1.08224
Ccdc152	0.0086427	0.447692	0.016	0.008	1		Cdc42ep3	0.000345189	0.413911	0.071	0.054	1		Mycbp	0	1.07868
Kbtbd3	0.360106	0.447474	0.012	0.006	1		Armcx1	8.87462e-07	0.413882	0.076	0.053	0.0175425		Pigf	0	1.07662
Slc43a3	3.45896e-35	0.447302	0.632	0.473	6.83732e-31		Necap1	0.00152345	0.41345	0.046	0.034	1		Pram1	0	1.07473
Rplp0	0.573047	0.447137	0.054	0.04	1		Cbx4	0.0265279	0.41333	0.038	0.03	1		Pebp1	0	1.0666
Kif1a	0.0231141	0.44695	0.01	0.006	1		Tor3a	0.00328115	0.413185	0.06	0.047	1		Mt1	0	1.06216
Cdkn2aipnl	0.0283623	0.446527	0.019	0.011	1		Rwdd1	0.000757771	0.413033	0.049	0.036	1		Dhrs1	0	1.06062
Hist1h4d	0.237362	0.446525	0.01	0.005	1		Gpkow	3.76984e-07	0.412889	0.084	0.059	0.00745184		Nfe2l3	0	1.0592
Hs6st1	0.0045112	0.446324	0.039	0.022	1		Copb2	1.85959e-07	0.412559	0.111	0.082	0.00367586		Mrps22	0	1.04093
Tfeb	3.62514e-09	0.445762	0.152	0.097	7.1658e-05		Fam173a	0.000963553	0.412396	0.056	0.043	1		Lgi2	0	1.03686
Dbn1	1.7373e-12	0.444954	0.14	0.088	3.43412e-08		Htra4	0.140816	0.412038	0.014	0.011	1		Igf2bp3	0	1.03136
Hmgcl	0.000124453	0.444613	0.088	0.059	1		Rpl17	3.16998e-06	0.411986	0.087	0.063	0.0626609		Hand2	0	1.02407
Tatdn2	0.0517106	0.44385	0.023	0.018	1		Ica1l	0.015512	0.411822	0.013	0.008	1		Psenen	0	1.02374
St6galnac4	0.00274043	0.443802	0.019	0.01	1		Msh5	0.015158	0.411806	0.013	0.008	1		Lrrc4	0	1.02012
Rsad1	1.25149e-06	0.44371	0.072	0.043	0.0247382		Eid2b	0.00380065	0.411791	0.016	0.01	1		Ldlrad2	0	1.0176
Mpg	0.000371227	0.44293	0.037	0.023	1		Ccdc167	0.000487519	0.411559	0.039	0.027	1		Lgals1	0	1.01486
Smurf1	2.90765e-23	0.442192	0.355	0.243	5.74755e-19		Rassf1	2.95638e-13	0.411451	0.25	0.192	5.84388e-09		Ormdl2	0	1.00686
Rps6	0.0696632	0.441986	0.043	0.026	1		Arf6	0.0327512	0.411365	0.031	0.024	1		Lysmd4	0	1.00197
Csnk2b	0.82491	0.441532	0.016	0.012	1		Map2k2	1.1239e-11	0.41135	0.153	0.108	2.22162e-07		Lynx1	0	0.996411
Ldb1	2.60718e-14	0.440478	0.139	0.086	5.15361e-10		Fam3a	0.00595626	0.41129	0.028	0.02	1		Rpp21	0	0.970257
Ndufa13	0.127326	0.44029	0.067	0.036	1		Akr1b3	0.000258927	0.411042	0.07	0.053	1		Ndufa6	0	0.968111
Stx4a	1.37671e-07	0.439488	0.132	0.078	0.00272134		Pomt1	0.00048013	0.410741	0.041	0.028	1		Ndufaf7	0	0.960682
Irak1bp1	0.0572764	0.43934	0.023	0.015	1		Glt8d1	1.59013e-11	0.410602	0.186	0.139	3.1432e-07		Ubl5	0	0.956681
Hsf5	0.525351	0.439032	0.01	0.007	1		Lca5l	0.0726572	0.41025	0.02	0.015	1		Dhps	0	0.956457
Mmp17	0.0340709	0.43881	0.018	0.012	1		Rab30	4.85015e-09	0.410002	0.164	0.125	9.58729e-05		Frmd5	0	0.948295
Tom1	2.98991e-07	0.438101	0.134	0.079	0.00591015		Lztfl1	1.59212e-09	0.409999	0.163	0.123	3.14715e-05		Slirp	0	0.947934
Ccdc85b	0.000147681	0.438039	0.021	0.01	1		Ppef2	0.203427	0.408988	0.01	0.008	1		Ocel1	0	0.943217
Ankrd54	0.0115304	0.437594	0.028	0.018	1		Agbl5	0.0250617	0.408915	0.027	0.02	1		Timm10b	0	0.933337
Rps5	0.296692	0.43746	0.039	0.026	1		Zfp235	0.0112233	0.408863	0.026	0.018	1		Dynll1	0	0.933227
Egr3	0.011305	0.436805	0.016	0.01	1		Taf6l	0.000185851	0.408714	0.063	0.046	1		Ccl7	0	0.93256
Phldb1	4.16191e-35	0.436774	0.507	0.348	8.22684e-31		Hmgn3	4.36314e-07	0.408609	0.094	0.068	0.00862461		Mrps26	0	0.931763
Cmtm4	1.81512e-05	0.436561	0.074	0.042	0.358795		Ndufa11	0.000649985	0.408492	0.041	0.029	1		Rbmxl1	0	0.925207
Ccndbp1	0.0251189	0.436535	0.028	0.02	1		Eef2kmt	0.000938846	0.407716	0.04	0.029	1		Ssr4	0	0.914773
Zfp784	0.148729	0.436334	0.014	0.007	1		Nudt22	0.140206	0.40729	0.011	0.008	1		Pebp4	0	0.900073
Arpc3	5.77847e-06	0.436222	0.105	0.067	0.114223		Hcfc1r1	0.00912297	0.407249	0.023	0.016	1		Sertad3	0	0.899319
Eif3i	0.118559	0.436017	0.03	0.018	1		Map2k3	5.13586e-06	0.407236	0.089	0.065	0.101521		Kcnrg	0	0.895815
Twist2	4.38128e-09	0.436001	0.101	0.065	8.66048e-05		Stmn2	0.0342518	0.407132	0.019	0.014	1		Mfap2	0	0.894414
Thoc3	0.0179519	0.435879	0.023	0.013	1		Yipf4	0.000216811	0.406956	0.096	0.077	1		Rbm4b	0	0.893542
P3h4	0.0578248	0.435719	0.026	0.017	1		Mettl1	0.000213961	0.406778	0.092	0.073	1		Dusp23	0	0.892274
Myo1c	2.18994e-10	0.435464	0.103	0.059	4.32886e-06		Armcx2	0.000277022	0.406758	0.042	0.029	1		Nr4a2	0	0.890437
Osbpl7	0.000914829	0.434292	0.039	0.021	1		Stradb	0.0107468	0.406523	0.044	0.034	1		Srp14	0	0.88643
Gprc5b	1.8707e-06	0.43415	0.08	0.05	0.0369782		Hmgcr	0.000121766	0.406335	0.061	0.045	1		Eid1	0	0.8847
Slc25a37	0.000144736	0.433803	0.089	0.055	1		Exosc4	0.00456468	0.406072	0.017	0.011	1		Chac2	0	0.878417
Zfp710	3.32967e-08	0.433132	0.137	0.084	0.000658175		Gnpda1	0.0229491	0.405862	0.025	0.019	1		Otud1	0	0.876105
Usp49	0.00328058	0.433116	0.04	0.021	1		Pcdhb17	0.00218926	0.405842	0.018	0.011	1		Ier3	0	0.87408
Nelfb	1.57132e-05	0.43252	0.084	0.05	0.310603		Phgdh	0.121397	0.405788	0.013	0.01	1		Slc24a5	0	0.871935
Nedd4l	1.9209e-23	0.43123	0.506	0.373	3.79704e-19		Surf2	0.00666071	0.405778	0.022	0.015	1		Rpl39	0	0.870252
Col8a1	2.6323e-43	0.431014	0.745	0.587	5.20327e-39		Cbr3	0.00971844	0.40575	0.028	0.02	1		Lrrc14	0	0.862661
Tmem189	1.51322e-05	0.430589	0.058	0.032	0.299119		Sec61g	0.00079466	0.405622	0.051	0.038	1		Mrpl40	0	0.861351
Lemd2	0.00293346	0.430534	0.052	0.035	1		Tchh	0.094518	0.40527	0.012	0.009	1		Ndufc1	0	0.858624
Dhdh	0.000612989	0.430475	0.047	0.031	1		Rrnad1	4.57471e-09	0.405137	0.126	0.09	9.04282e-05		Sat1	0	0.851977
Dtymk	0.00125187	0.430366	0.067	0.039	1		Mttp	0.0314052	0.404891	0.029	0.023	1		Sft2d3	0	0.833439
Lysmd2	4.29278e-06	0.429761	0.073	0.045	0.0848555		Cdc7	0.006578	0.404853	0.037	0.028	1		Tmsb10	0	0.832938
Rhot1	2.98082e-09	0.429362	0.177	0.105	5.89219e-05		Calr	0.0059988	0.40444	0.065	0.053	1		Fam189b	0	0.832399
Cyp39a1	1.37734e-07	0.428895	0.1	0.066	0.0027226		Ndufv3	0.000181721	0.404431	0.06	0.044	1		Rpl36	0	0.829999
Zfp946	0.0102317	0.42882	0.031	0.021	1		Tmem69	0.043943	0.404311	0.013	0.009	1		Jtb	0	0.827688
Plekhg2	1.56353e-20	0.428741	0.247	0.155	3.09063e-16		Gnal	0.00311519	0.404045	0.024	0.016	1		Iscu	0	0.826537
Med20	4.34813e-05	0.428686	0.043	0.024	0.859495		Stk16	0.000255749	0.403907	0.056	0.041	1		Sat2	0	0.822806
Mvk	0.0936625	0.427579	0.018	0.012	1		Gnpda2	0.00419021	0.403805	0.043	0.032	1		Uba52	0	0.821978
Slc4a2	0.00512251	0.427495	0.061	0.038	1		Uxt	0.00699989	0.403728	0.019	0.013	1		H2afj	0	0.817199
Piezo1	5.05807e-07	0.42738	0.145	0.096	0.0099983		Alkbh2	0.0722493	0.403633	0.021	0.016	1		Tmem208	0	0.813238
Tomm6	0.0320649	0.42725	0.017	0.01	1		Eif3c	0.000145115	0.403493	0.114	0.093	1		Atp5o	0	0.802217
Slc1a4	0.00195424	0.426825	0.031	0.019	1		Pamr1	0.000165749	0.403259	0.042	0.029	1		Mrpl43	0	0.801949
Ncdn	0.00144447	0.426768	0.018	0.01	1		Dpy30	0.000166369	0.403039	0.054	0.039	1		Ccdc73	0	0.801878
Smim15	0.0103676	0.426674	0.021	0.015	1		Actg1	1.95987e-24	0.402318	0.604	0.521	3.87407e-20		Tuba1a	0	0.801844
Plcl1	5.04754e-43	0.426483	0.658	0.479	9.97748e-39		Sirt4	0.000430284	0.402216	0.034	0.023	1		Tspyl4	0	0.800045
Ankrd13a	2.65366e-06	0.426335	0.074	0.051	0.0524549		Midn	7.55992e-06	0.40218	0.108	0.084	0.149437		Psip1	0	0.79853
Prss36	0.0786409	0.426306	0.02	0.01	1		Pdcl3	0.0228158	0.402075	0.038	0.03	1		Lsm7	0	0.797776
Ddx47	4.09091e-05	0.425943	0.052	0.026	0.808651		Upf3a	0.000687069	0.402012	0.034	0.023	1		Kcnn3	0	0.796532
Enpp6	0.00388232	0.425844	0.014	0.008	1		Prrg3	0.0325502	0.401351	0.036	0.029	1		Iah1	0	0.795993
Per2	9.68208e-17	0.424925	0.074	0.042	1.91386e-12		Tssc4	0.0313277	0.401017	0.039	0.031	1		Rpl29	0	0.787048
Arhgap20	0.214134	0.424891	0.015	0.011	1		Flt3l	1.6928e-11	0.40085	0.233	0.182	3.34617e-07		Hspb1	0	0.779422
Nptn	2.47553e-20	0.424881	0.371	0.261	4.89337e-16		Ppp1ca	0.00973575	0.399959	0.04	0.031	1		Mrpl4	0	0.774861
Arpc5l	0.249187	0.423934	0.042	0.025	1		Kif5c	0.0157692	0.399711	0.025	0.018	1		Agrp	0	0.774318
Psmd4	1.38699e-08	0.42372	0.096	0.062	0.000274165		Zfp687	0.00815123	0.399711	0.034	0.025	1		Baiap2l1	0	0.773641
Tradd	0.0813215	0.423705	0.024	0.016	1		Bloc1s4	0.0822722	0.399655	0.011	0.008	1		Slc16a4	0	0.77111
Clybl	3.60547e-05	0.423223	0.15	0.09	0.712693		Fam111a	0.00098945	0.399598	0.069	0.054	1		Nt5c	0	0.77009
Prickle3	0.018145	0.423087	0.018	0.011	1		H2afz	0.000296975	0.399581	0.042	0.029	1		BC003965	0	0.769091
Zfp770	0.127999	0.421786	0.019	0.012	1		Fam50a	0.0178869	0.399348	0.025	0.018	1		Krtcap2	0	0.768763
Znrf1	1.72634e-11	0.421653	0.199	0.117	3.41245e-07		Fpgt	0.000836654	0.399233	0.041	0.029	1		Crip1	0	0.76747
Slco1a4	0.0115957	0.421598	0.026	0.017	1		Armcx5	0.000360439	0.399162	0.037	0.025	1		Camk1	0	0.766981
Cyhr1	0.231609	0.421456	0.05	0.03	1		Ift20	1.80981e-05	0.399146	0.089	0.067	0.357745		Irf3	0	0.766772
Nfix	3.30315e-38	0.421443	0.647	0.483	6.52933e-34		Slc7a6os	1.47691e-06	0.399069	0.125	0.096	0.029194		Usp50	0	0.759559
Ltbr	0.0520106	0.421441	0.043	0.028	1		Ormdl3	0.0017899	0.399002	0.024	0.016	1		Sh3gl1	0	0.757575
Notch3	1.31275e-09	0.421138	0.146	0.096	2.59491e-05		Plk3	0.000926251	0.398927	0.059	0.045	1		Ifitm2	0	0.752415
Aco1	1.28798e-08	0.420878	0.121	0.076	0.000254595		Hps4	6.65518e-05	0.398911	0.068	0.05	1		Ndufa13	0	0.750156
Rhbdf1	1.12053e-08	0.420483	0.088	0.051	0.000221495		Fam133b	6.60728e-08	0.398879	0.152	0.118	0.00130606		Xrcc6	0	0.747508
Otud7a	0.000405296	0.420214	0.039	0.024	1		Itpa	0.00837534	0.398593	0.034	0.025	1		Trappc4	0	0.74563
Dock6	2.02594e-14	0.419912	0.183	0.116	4.00467e-10		Inha	0.016006	0.398464	0.034	0.026	1		Tspan17	0	0.744357
Ptov1	0.039689	0.419905	0.049	0.029	1		Atxn2l	1.87834e-08	0.398382	0.18	0.142	0.000371291		Tslp	0	0.742399
Plaur	0.0153258	0.419755	0.017	0.01	1		Shf	0.0130482	0.398353	0.031	0.023	1		Tcta	0	0.742128
Smim14	2.49593e-18	0.419631	0.29	0.185	4.93371e-14		Cct5	0.0010175	0.3983	0.054	0.041	1		Cd151	0	0.741034
Pja1	0.0278834	0.41949	0.025	0.016	1		Tril	0.25	0.3981	0.017	0.014	1		Mtx1	0	0.739192
Tmem231	0.417617	0.419398	0.012	0.008	1		Utp23	0.026359	0.398035	0.016	0.011	1		Tmem126a	0	0.737346
Fbln2	2.39107e-23	0.419238	0.406	0.288	4.72643e-19		Ndufb8	0.00228507	0.397916	0.052	0.04	1		Rpl10	0	0.735524
Mast3	0.000736164	0.418566	0.042	0.026	1		Gtpbp8	0.00132385	0.397203	0.081	0.065	1		Atg4d	0	0.73544
Mtmr4	0.0593127	0.41854	0.036	0.023	1		Mfap1b	0.000150502	0.396514	0.083	0.064	1		Lage3	0	0.734964
Dgat1	0.0193692	0.418508	0.044	0.027	1		Rps11	5.12999e-07	0.396345	0.061	0.04	0.0101404		Etnk2	0	0.734757
Spata13	0.0908388	0.418199	0.011	0.006	1		Timmdc1	2.44918e-07	0.396129	0.118	0.089	0.0048413		Cggbp1	0	0.732249
Tmem39b	0.00167803	0.418184	0.026	0.017	1		Slx1b	1.07616e-05	0.395903	0.068	0.049	0.212724		B3gnt9	0	0.731737
Frrs1	0.123411	0.417541	0.014	0.009	1		Tmem256	0.000268139	0.395886	0.047	0.033	1		Zfp511	0	0.730383
Slc35f5	0.00148894	0.417507	0.059	0.038	1		Tprgl	0.000454339	0.395837	0.043	0.031	1		Zfp329	0	0.730367
Polm	5.35074e-06	0.417497	0.056	0.034	0.105768		Vhl	0.00445148	0.395814	0.037	0.027	1		Hs6st2	0	0.728556
Syf2	0.115149	0.416439	0.022	0.016	1		Zgpat	0.000906059	0.395484	0.055	0.041	1		Hypk	0	0.727374
Syde2	7.50893e-06	0.415832	0.012	0.005	0.148429		Camkk1	0.00629232	0.395479	0.027	0.019	1		Fosb	0	0.725388
Fbxw7	2.98995e-10	0.415277	0.154	0.095	5.91024e-06		Higd1a	0.00130863	0.394721	0.049	0.037	1		Mus81	0	0.725293
Ldlrap1	0.00183382	0.415091	0.048	0.033	1		Malsu1	9.06597e-07	0.394472	0.151	0.119	0.0179207		Vcam1	0	0.724891
Chml	0.000509776	0.415076	0.024	0.014	1		Setd4	4.17821e-05	0.394203	0.092	0.07	0.825907		Commd3	0	0.720653
Cirbp	0.051541	0.414756	0.043	0.022	1		Rcc1	1.05151e-05	0.393827	0.084	0.062	0.207852		Hccs	0	0.716377
Hsd3b7	0.00087228	0.414684	0.034	0.02	1		Gzf1	0.003221	0.393649	0.042	0.031	1		Fth1	0	0.714513
Lrrfip2	2.82278e-12	0.414098	0.124	0.072	5.5798e-08		Entpd2	4.28651e-11	0.393406	0.203	0.155	8.47314e-07		Papln	0	0.713976
Samd4	1.41829e-28	0.413866	0.526	0.392	2.80353e-24		Josd1	4.02144e-05	0.39334	0.053	0.037	0.794917		Manf	0	0.713204
Rbpj	8.9183e-08	0.413754	0.235	0.167	0.00176288		Cacna1g	0.13156	0.392631	0.013	0.01	1		Cenpp	0	0.710177
Trim11	2.01865e-06	0.413634	0.094	0.061	0.0399028		Sag	0.119891	0.392452	0.028	0.024	1		Gem	0	0.708196
Ankrd16	1.4445e-07	0.41349	0.098	0.06	0.00285534		Dpm2	0.00536415	0.391891	0.038	0.028	1		Ggact	0	0.706741
Taf1d	1.69382e-18	0.412707	0.203	0.129	3.34818e-14		Dnajb1	0.0522982	0.391552	0.025	0.02	1		Bcl10	0	0.700228
Nipal2	0.0887962	0.412474	0.011	0.006	1		Zfp946	0.00714915	0.391294	0.035	0.027	1		Dnaja2	0	0.697622
Tns1	1.61461e-18	0.411875	0.293	0.207	3.19159e-14		Senp8	0.0154161	0.390752	0.023	0.016	1		Ndufb2	0	0.696896
Kcnd1	0.00238738	0.411469	0.02	0.011	1		Spef1	0.104178	0.390488	0.024	0.02	1		Atat1	0	0.693371
Plxdc1	3.80003e-05	0.411368	0.088	0.065	0.751152		P2ry1	0.034798	0.390372	0.029	0.023	1		Pdcd5	0	0.692897
Pdzd2	1.16443e-38	0.411325	0.658	0.51	2.30173e-34		Dok1	0.0532735	0.39037	0.016	0.012	1		Leng9	0	0.692878
Ralb	3.58785e-07	0.411309	0.076	0.046	0.0070921		Isca2	3.37134e-05	0.38991	0.071	0.052	0.666412		Echdc1	0	0.687609
Sox13	4.2253e-14	0.411268	0.21	0.143	8.35214e-10		Ubxn1	0.000522077	0.38955	0.052	0.038	1		Smim4	0	0.684287
Zmym3	0.149635	0.411237	0.028	0.016	1		Pts	0.00509353	0.389156	0.051	0.04	1		Emp3	0	0.68231
Pwwp2b	0.112923	0.41119	0.022	0.013	1		Zfp940	0.0607839	0.388818	0.012	0.008	1		Cdkn2aip	0	0.67632
Capn1	6.68431e-05	0.41118	0.052	0.031	1		Pfdn6	0.0283694	0.388791	0.014	0.01	1		Gng5	0	0.674606
Smarcd2	4.81439e-10	0.411002	0.119	0.077	9.5166e-06		Cd302	2.70723e-07	0.38844	0.128	0.097	0.00535138		Oaz1	0	0.673101
Habp4	0.0151212	0.410871	0.036	0.022	1		Cpsf2	0.00270294	0.388348	0.043	0.032	1		Vegfb	0	0.671855
Ran	0.0114914	0.410847	0.013	0.008	1		Ypel1	0.000451605	0.388203	0.042	0.03	1		Rnf167	0	0.669759
Hes1	3.6699e-10	0.409424	0.166	0.108	7.2543e-06		Fam104a	1.32291e-05	0.38728	0.089	0.066	0.2615		Pdlim2	0	0.663911
Narf	3.23501e-07	0.409418	0.075	0.048	0.00639464		Ggcx	0.000260231	0.387181	0.081	0.063	1		Thbs1	0	0.663488
Rps15a	0.0199825	0.408708	0.051	0.04	1		Wdr12	0.000176135	0.387166	0.059	0.043	1		Ate1	0	0.66339
Chek2	0.0213977	0.408602	0.023	0.014	1		Aspa	2.12536e-10	0.387164	0.273	0.223	4.2012e-06		Trim35	0	0.659335
Arl2bp	0.413698	0.408575	0.033	0.018	1		Naf1	0.0743247	0.387034	0.041	0.035	1		Ctbp2	0	0.65834
Sprtn	0.000210174	0.407782	0.041	0.023	1		Lamtor4	0.144465	0.386604	0.014	0.011	1		Epha3	0	0.658183
Mink1	3.08869e-05	0.407688	0.088	0.055	0.610541		Rnf126	0.0439158	0.386233	0.032	0.026	1		Fos	0	0.657532
Hoga1	1.91505e-06	0.406939	0.079	0.05	0.0378548		Ndufa3	0.00294256	0.386153	0.055	0.043	1		Crebzf	0	0.656626
Abcd1	0.00470363	0.406821	0.038	0.022	1		Cdk4	0.00260915	0.38577	0.041	0.031	1		Use1	0	0.656596
Rsl24d1	0.062391	0.406775	0.011	0.007	1		Fhl3	0.110381	0.385639	0.015	0.012	1		Knop1	0	0.655726
Fbxw9	0.0738967	0.406369	0.022	0.013	1		Anapc11	5.78374e-05	0.385625	0.07	0.051	1		Pgam5	0	0.654237
Mcm7	0.017711	0.406288	0.031	0.019	1		Tnfrsf10b	0.0736395	0.385484	0.015	0.011	1		Fibp	0	0.653416
Gid8	0.457854	0.406244	0.021	0.014	1		Rpl32	0.000211288	0.385328	0.055	0.04	1		Lamb3	0	0.653375
Erlin2	0.0048818	0.405959	0.036	0.02	1		Fbxw17	0.00048622	0.385168	0.062	0.047	1		Ftl1	0	0.650084
Ppl	7.18873e-13	0.405154	0.17	0.108	1.421e-08		Tmem165	1.10462e-08	0.384714	0.169	0.131	0.000218351		Pdgfrl	0	0.648562
Ttc1	0.00399729	0.404914	0.038	0.023	1		Trim34a	1.11185e-06	0.384593	0.112	0.085	0.0219779		Ntan1	0	0.645857
Eif2b2	0.00451859	0.404355	0.037	0.022	1		Cdr2l	0.000994462	0.383917	0.053	0.039	1		Rpl6	0	0.641535
Ilk	4.29761e-11	0.403577	0.166	0.101	8.49508e-07		Tmtc4	0.00651139	0.383836	0.036	0.027	1		Sfr1	0	0.641523
Bcar1	0.00946174	0.403485	0.058	0.037	1		Nvl	3.71564e-11	0.383714	0.217	0.167	7.3447e-07		Prdx4	0	0.639027
Asphd2	0.0640917	0.403211	0.012	0.008	1		Gnl3	6.77977e-07	0.383475	0.117	0.088	0.0134016		Dtymk	0	0.638845
Nppa	1.78164e-06	0.403026	0.026	0.026	0.0352176		Rps28	6.932e-06	0.383284	0.089	0.066	0.137025		Fam53b	0	0.635745
Gsta3	3.07235e-21	0.402898	0.296	0.194	6.07312e-17		Pde7b	7.99114e-11	0.383131	0.324	0.27	1.57961e-06		Rpl22l1	0	0.635268
Rnf146	1.97028e-06	0.402841	0.119	0.076	0.0389464		Adgrd1	6.33754e-10	0.382852	0.232	0.184	1.25274e-05		G0s2	0	0.63464
Gstt2	1.08284e-10	0.402813	0.12	0.074	2.14045e-06		Efs	0.00208523	0.38277	0.058	0.045	1		Uqcrfs1	0	0.634042
Tcirg1	9.80076e-06	0.40276	0.08	0.046	0.193732		Ppib	0.000108748	0.382649	0.079	0.06	1		Atxn7l3b	0	0.631475
Mcee	0.236227	0.402571	0.021	0.015	1		Adamtsl3	7.91305e-21	0.382582	0.425	0.341	1.56417e-16		Pcolce	0	0.630121
Amer1	6.0028e-06	0.40221	0.04	0.023	0.118657		Rcn3	1.42988e-05	0.38257	0.071	0.052	0.282643		Tigd2	0	0.629876
Ss18l1	0.1148	0.401921	0.018	0.011	1		Arl2	0.0254046	0.382095	0.024	0.018	1		Igf2r	0	0.629529
Pdk4	0.018216	0.401809	0.011	0.009	1		Nup210l	0.0082193	0.381614	0.027	0.019	1		Sertad4	0	0.627971
Yrdc	0.219925	0.401752	0.016	0.008	1		Pigv	0.00189809	0.381556	0.044	0.033	1		Rps23	0	0.624517
Stk11	0.000369674	0.401629	0.076	0.045	1		Rps27a	4.23818e-06	0.38145	0.098	0.074	0.0837761		Tmem60	0	0.620868
Rbm45	0.00261734	0.401613	0.033	0.021	1		Fam210a	1.64458e-06	0.381167	0.107	0.08	0.0325085		Bet1l	0	0.620843
Slc9a3r2	0.0117834	0.401541	0.024	0.014	1		Trnt1	0.000461536	0.38114	0.06	0.045	1		Eif1	0	0.619272
Vhl	0.00987153	0.401038	0.028	0.018	1		Mapk1ip1	0.000188695	0.381087	0.069	0.052	1		Rpl15	0	0.613901
Asb6	0.57068	0.400833	0.029	0.02	1		Lrrtm3	4.45437e-07	0.380829	0.147	0.115	0.00880495		Atp5d	0	0.611437
Ino80e	0.000173711	0.400678	0.066	0.044	1		Cyhr1	4.84871e-05	0.380729	0.091	0.069	0.958445		Tfe3	0	0.609942
Map3k10	1.39927e-07	0.400538	0.09	0.055	0.00276593		Tuba1c	0.0102765	0.380656	0.027	0.02	1		Ptma	0	0.609888
Dnm1	1.18035e-26	0.399625	0.436	0.298	2.33319e-22		Cit	0.762895	0.38039	0.013	0.012	1		Psmd7	0	0.609262
C1qtnf6	0.0071572	0.399319	0.05	0.036	1		Slc16a6	0.0417551	0.379897	0.018	0.014	1		Ifi27	0	0.607711
Ptk7	1.03656e-05	0.398775	0.096	0.069	0.204896		Rchy1	1.32404e-09	0.379772	0.177	0.135	2.61723e-05		Abhd14b	0	0.60587
Grasp	2.33206e-07	0.398773	0.112	0.073	0.00460978		Ncapd3	7.90413e-05	0.379729	0.094	0.073	1		Nfatc4	0	0.604709
Tulp3	4.9938e-11	0.39874	0.171	0.111	9.87125e-07		Pi16	4.26505e-09	0.379462	0.178	0.136	8.43073e-05		Cox7c	0	0.602182
Rps6ka4	0.031767	0.398657	0.019	0.011	1		Sec13	5.67928e-06	0.379391	0.064	0.044	0.112262		Srsf7	0	0.601803
Eif4a2	5.52006e-15	0.398598	0.228	0.151	1.09115e-10		Pkmyt1	0.0152566	0.379144	0.025	0.018	1		Slc3a2	0	0.600606
Lmbr1l	3.88474e-06	0.398256	0.083	0.055	0.0767897		Hs3st3b1	0.0734268	0.379121	0.032	0.026	1		Dynlt1c	0	0.597569
Zbed3	0.265281	0.398167	0.031	0.023	1		C2cd2l	0.0722473	0.378969	0.021	0.016	1		Atp5j	0	0.59735
Ubxn6	0.0195323	0.398034	0.039	0.022	1		Sft2d1	8.80873e-09	0.378789	0.129	0.094	0.000174122		Snx21	0	0.5961
Fzd3	0.186094	0.397819	0.012	0.007	1		Ces1d	0.0252378	0.378789	0.035	0.027	1		Fbxl2	0	0.589856
Qsox1	7.68341e-08	0.397775	0.087	0.053	0.00151878		Mgat4b	3.65282e-06	0.378455	0.079	0.057	0.0722052		Rps16	0	0.589095
Mkks	0.502108	0.397639	0.012	0.009	1		Eif1b	0.00109083	0.378401	0.033	0.023	1		Slc50a1	0	0.588047
Ctr9	0.00436721	0.397242	0.064	0.045	1		Sppl2b	0.0202637	0.378367	0.036	0.028	1		Mob3a	0	0.5872
Pitpnm1	0.105019	0.396995	0.017	0.009	1		Gle1	5.05656e-08	0.378345	0.146	0.111	0.00099953		Dalrd3	0	0.587059
Polr1b	0.00695354	0.396896	0.035	0.021	1		Serpinb6a	8.76898e-14	0.378302	0.268	0.207	1.73336e-09		Rpl9	0	0.586185
Pcgf5	2.33229e-10	0.396846	0.138	0.082	4.61025e-06		Homer3	0.000622961	0.378212	0.073	0.057	1		Rpl18a	0	0.586162
Terf2	6.27464e-09	0.39676	0.156	0.1	0.000124031		Ndufb4	0.0135649	0.378052	0.048	0.038	1		Taf7	0	0.58604
Lrrc56	0.67739	0.396739	0.012	0.009	1		Poll	0.233502	0.377955	0.011	0.009	1		Cpne2	0	0.585912
Brap	1.22008e-07	0.396629	0.116	0.078	0.00241173		Foxs1	0.786167	0.377539	0.015	0.014	1		Zfp408	0	0.583872
Mss51	0.00268408	0.396615	0.052	0.037	1		Psmc1	5.00965e-05	0.377363	0.089	0.068	0.990257		Jund	0	0.579674
Neurl1b	0.160481	0.396604	0.013	0.009	1		Ccdc32	0.0204747	0.3766	0.019	0.014	1		Wbp2	0	0.578737
P2rx7	2.0082e-08	0.396465	0.091	0.058	0.000396961		Timm13	0.0813724	0.376523	0.025	0.02	1		BC005561	0	0.578077
Zfp617	0.00472938	0.395423	0.037	0.022	1		Usp1	0.00919972	0.376521	0.05	0.04	1		Tmem243	0	0.57165
Adgrg6	0.365045	0.395368	0.01	0.006	1		Sync	0.00226059	0.376519	0.059	0.046	1		Usp21	0	0.570881
Dus2	0.111176	0.394244	0.038	0.023	1		Pdlim3	0.00168589	0.376441	0.206	0.184	1		Btg2	0	0.566059
Zbtb2	7.3622e-06	0.394047	0.07	0.043	0.145529		Tubb6	5.21796e-05	0.376305	0.089	0.068	1		Rpl30	0	0.564499
Bccip	0.000763187	0.393727	0.037	0.023	1		Gstz1	1.7024e-05	0.37625	0.114	0.09	0.336514		Cdc42ep2	0	0.563963
Ankrd40	0.0842343	0.393583	0.066	0.05	1		Dusp12	5.87173e-05	0.376078	0.092	0.071	1		Ddit3	0	0.562484
Nme2	0.02479	0.392738	0.044	0.024	1		Lsp1	1.04864e-17	0.376062	0.378	0.302	2.07284e-13		Ppp1r14a	0	0.56178
Tmed2	0.00166335	0.392379	0.108	0.073	1		Spata1	0.000619589	0.375663	0.074	0.057	1		Imp3	0	0.559197
Abhd17a	0.0325334	0.39229	0.025	0.017	1		Crot	1.22119e-06	0.375341	0.098	0.072	0.0241392		Vamp2	0	0.55879
Mcl1	1.26976e-10	0.391961	0.135	0.086	2.50994e-06		Porcn	0.0095464	0.375214	0.025	0.018	1		Rps18	0	0.558133
Alkbh3	8.43177e-06	0.391951	0.076	0.046	0.166671		Ltbp2	0.994065	0.375188	0.028	0.028	1		Lrpap1	0	0.557856
Jmjd8	0.000340531	0.391885	0.013	0.005	1		S100a16	0.00102786	0.374718	0.049	0.036	1		Mrps24	0	0.557808
Metap1	0.000138351	0.391801	0.069	0.046	1		Prmt2	0.00102377	0.374702	0.06	0.046	1		Rpl41	0	0.556268
Ankrd26	0.000519986	0.391224	0.075	0.048	1		Nudt8	0.0172721	0.374427	0.019	0.014	1		Izumo4	0	0.555652
Natd1	0.106443	0.390697	0.022	0.016	1		Cd34	3.30664e-16	0.374162	0.343	0.274	6.53623e-12		Parp3	0	0.555118
Rps26	0.223611	0.39054	0.037	0.022	1		Mfap3	4.89366e-06	0.374095	0.113	0.087	0.096733		Zranb2	0	0.553888
Atat1	0.00510478	0.389709	0.049	0.033	1		Eef1a1	7.85514e-13	0.373806	0.263	0.207	1.55273e-08		Sqstm1	0	0.552141
Lsm7	0.00082266	0.389656	0.031	0.015	1		Prpsap1	1.91941e-08	0.373798	0.156	0.119	0.00037941		Vps29	0	0.546762
Ralgps2	0.506005	0.389434	0.011	0.007	1		Sigmar1	0.00157366	0.373719	0.029	0.02	1		Mfap1a	0	0.546671
Eya1	0.370408	0.389182	0.019	0.014	1		Vamp4	3.00525e-08	0.373469	0.218	0.178	0.000594048		Tnfaip2	0	0.545566
Gar1	0.0749219	0.388995	0.018	0.011	1		Scube1	0.232416	0.373122	0.01	0.008	1		Ppt1	0	0.544367
Pxmp4	0.00165648	0.388561	0.057	0.032	1		Myd88	0.018053	0.373041	0.019	0.014	1		Ccni	0	0.542784
Bad	0.200698	0.38854	0.027	0.017	1		Ilk	5.90443e-09	0.372906	0.207	0.165	0.000116713		Ldha	0	0.542749
Ppp2cb	3.09587e-07	0.388398	0.12	0.081	0.00611961		Rtp4	0.030296	0.372877	0.03	0.023	1		Rnf26	0	0.542613
Nkain2	1.6226e-08	0.387787	0.218	0.171	0.00032074		Gzmm	0.175402	0.372848	0.018	0.015	1		Snapin	0	0.542005
Pttg1ip	0.00189787	0.387645	0.06	0.041	1		Pisd	0.0617736	0.372814	0.036	0.03	1		Ifitm3	0	0.541899
Ulk1	0.002644	0.387226	0.054	0.035	1		Iffo1	9.78577e-09	0.372643	0.177	0.137	0.000193435		H3f3a	0	0.541065
Galnt16	1.04304e-11	0.387191	0.188	0.125	2.06179e-07		Mboat7	0.00282443	0.372635	0.037	0.027	1		Ndufa4	0	0.540244
Srsf3	7.47566e-07	0.386767	0.187	0.119	0.0147771		Pusl1	0.0966335	0.372622	0.018	0.014	1		Mrps10	0	0.537341
Eda2r	0.000406001	0.38622	0.031	0.019	1		Ret	5.31357e-06	0.372525	0.108	0.082	0.105033		Ctsl	0	0.537002
Nr1h2	0.0212462	0.386173	0.045	0.028	1		Rfc4	0.379411	0.372338	0.01	0.008	1		Gps2	0	0.533046
Hsf2	0.00906669	0.385869	0.068	0.047	1		Zfhx4	2.9171e-06	0.372153	0.138	0.109	0.0576623		Puf60	0	0.530679
Kcnip1	1.06629e-11	0.385859	0.21	0.148	2.10774e-07		Rufy2	8.14457e-13	0.371982	0.234	0.178	1.60994e-08		Coro1b	0	0.530011
Eml2	0.0769154	0.385542	0.016	0.009	1		Cep290	0.000180614	0.371908	0.06	0.044	1		Igdcc4	0	0.52875
Slc12a9	0.00016724	0.385178	0.034	0.02	1		Cd55	1.46526e-14	0.371792	0.234	0.175	2.89637e-10		Eif2b4	0	0.528424
Rhbdd3	0.110891	0.385065	0.021	0.012	1		Atad2	0.00162298	0.371667	0.089	0.073	1		Rab34	0	0.526827
Kif5a	0.0823869	0.384785	0.018	0.011	1		Trmt13	5.34351e-07	0.37166	0.14	0.108	0.0105625		Rps3a1	0	0.524393
Mme	4.93313e-06	0.384455	0.113	0.074	0.0975132		Arrdc4	0.221606	0.371613	0.023	0.02	1		Gabarap	0	0.523647
Hsd11b1	1.7901e-11	0.384399	0.187	0.131	3.53849e-07		Mmp19	0.000105155	0.371543	0.051	0.036	1		Tmed9	0	0.522331
Limk1	4.10717e-07	0.384042	0.073	0.043	0.00811863		S100a1	0.0100783	0.371205	0.029	0.022	1		Ints2	0	0.518703
Ndrg3	4.17714e-05	0.384009	0.125	0.078	0.825695		Angptl1	0.000587448	0.371204	0.028	0.018	1		Klf2	0	0.518514
Snf8	4.0809e-05	0.383995	0.083	0.052	0.806672		Cfap97	0.0127468	0.371121	0.063	0.052	1		Nsa2	0	0.516716
Atn1	1.33614e-09	0.383977	0.105	0.063	2.64115e-05		Yipf3	0.00049158	0.370814	0.068	0.052	1		Ndufaf4	0	0.516674
Snx8	0.00725848	0.383965	0.067	0.047	1		Psmg2	0.257195	0.370727	0.038	0.034	1		Tlcd2	0	0.514151
Ssbp1	2.24385e-05	0.383958	0.078	0.046	0.443543		Rps24	3.63604e-06	0.370511	0.13	0.102	0.0718736		Jun	0	0.513327
Tmem245	4.77666e-10	0.383914	0.14	0.086	9.44203e-06		Polr3d	3.12929e-05	0.369976	0.056	0.039	0.618567		Preb	0	0.512957
Akt1	0.148907	0.383904	0.037	0.022	1		Cebpb	1.25906e-05	0.369241	0.167	0.138	0.248879		Rps10	0	0.512842
Gabarapl1	0.0811823	0.383895	0.025	0.016	1		Fau	8.85539e-06	0.369185	0.087	0.065	0.175044		Cebpz	0	0.509597
Nalcn	2.39559e-12	0.383889	0.259	0.183	4.73536e-08		Gpn1	0.00395884	0.368888	0.04	0.03	1		Ccdc28b	0	0.508013
Pacs2	2.2296e-16	0.38375	0.252	0.168	4.40724e-12		Strbp	7.06013e-19	0.368718	0.343	0.264	1.39558e-14		Tmed2	0	0.506345
Sccpdh	0.031881	0.38358	0.019	0.011	1		Rps27l	0.0767605	0.368704	0.02	0.016	1		Thoc7	0	0.50531
Prkcsh	0.0211449	0.383578	0.037	0.021	1		Degs1	0.000172342	0.368643	0.051	0.036	1		Rpl27a	0	0.502328
Cnp	0.21338	0.383484	0.016	0.01	1		Zfp94	0.319692	0.36851	0.017	0.015	1		Ndufb10	0	0.499488
Zfp318	0.00049821	0.383342	0.093	0.059	1		Rps4x	0.0317225	0.368019	0.064	0.054	1		Slc38a2	0	0.499231
Brd1	5.52893e-20	0.382913	0.267	0.176	1.0929e-15		Glrx	0.382925	0.367956	0.016	0.014	1		Rdh5	0	0.498867
Tcea2	0.550472	0.381926	0.01	0.007	1		Zfp677	0.00504734	0.367956	0.028	0.02	1		Rnft1	0	0.493907
Ndor1	0.000212691	0.381845	0.054	0.031	1		Aff2	0.000476928	0.367887	0.084	0.066	1		Cox11	0	0.489026
Rgp1	0.852707	0.381235	0.024	0.016	1		Rps26	2.00324e-05	0.367732	0.076	0.056	0.39598		Junb	0	0.486661
Llph	0.0340539	0.381234	0.041	0.025	1		Slc35c2	0.000361706	0.367561	0.044	0.031	1		Khsrp	0	0.483479
Mapk8ip1	0.00110868	0.381048	0.036	0.022	1		Pcif1	3.22573e-05	0.367344	0.093	0.071	0.637631		Cep68	0	0.482898
Atad2	4.25596e-05	0.380229	0.067	0.042	0.841276		Hinfp	0.0163774	0.367261	0.031	0.024	1		Rpl13	0	0.482581
Srsf5	1.93108e-30	0.380095	0.323	0.223	3.81718e-26		Prpf4b	1.45072e-23	0.367243	0.474	0.384	2.86764e-19		Enpp1	0	0.480876
Dip2b	1.32736e-15	0.37994	0.285	0.189	2.62379e-11		Plaur	0.0733281	0.367218	0.03	0.024	1		Mtmr11	0	0.479751
Spsb3	0.897398	0.379884	0.021	0.014	1		Polr3a	0.000267276	0.367097	0.08	0.063	1		Rps20	0	0.479371
Ccdc14	0.407744	0.379612	0.013	0.01	1		Sall2	0.141097	0.366968	0.011	0.008	1		Serf2	0	0.477077
Vamp5	1.41519e-08	0.379263	0.134	0.086	0.00027974		Mier2	0.129516	0.366752	0.026	0.021	1		Slbp	0	0.476448
Stat6	1.21051e-08	0.379126	0.131	0.083	0.000239281		Gadd45gip1	0.0225853	0.366688	0.016	0.011	1		Mmp23	0	0.476129
Ppp1r12c	5.722e-11	0.378956	0.158	0.102	1.13107e-06		Ppwd1	1.84564e-06	0.366306	0.113	0.085	0.0364828		Cbwd1	0	0.474482
Fkbp5	5.52639e-28	0.378897	0.55	0.402	1.0924e-23		Gpr153	1.03526e-09	0.366165	0.194	0.15	2.0464e-05		Kcnk2	0	0.471595
Zkscan3	1.11887e-08	0.378774	0.175	0.109	0.000221167		Rab13	0.102378	0.365931	0.018	0.014	1		S100a6	0	0.471097
Fam53a	0.000899393	0.378601	0.065	0.039	1		Nsmce4a	0.112772	0.36593	0.021	0.017	1		Rnase4	0	0.471023
Fyco1	0.00623874	0.377828	0.041	0.021	1		Bop1	0.00242385	0.365898	0.033	0.024	1		Dsel	0	0.468892
Ano3	0.00263579	0.377616	0.03	0.018	1		Zfp820	0.0109789	0.365869	0.018	0.012	1		Tcp1	0	0.468112
Agpat3	8.33976e-08	0.376961	0.178	0.112	0.00164852		Itgb3bp	2.82155e-05	0.365705	0.117	0.093	0.557737		Igsf8	0	0.467738
Qsox2	0.292751	0.376761	0.025	0.013	1		Nr1d1	2.61324e-11	0.365651	0.243	0.191	5.1656e-07		Zfp692	0	0.461205
Cdkl5	0.0681269	0.376299	0.036	0.021	1		Cd63	0.000130859	0.365091	0.085	0.066	1		Pnrc1	0	0.460661
Polr2k	0.0513223	0.376288	0.023	0.013	1		Rfxap	0.176114	0.365062	0.019	0.016	1		Zcchc9	0	0.460192
Dgkd	0.022187	0.376245	0.075	0.047	1		Fuom	0.0593544	0.364983	0.013	0.009	1		Rps29	0	0.460072
Lrfn4	0.0928068	0.376168	0.011	0.006	1		Slc35a5	0.0572074	0.364815	0.043	0.036	1		Ahsa2	0	0.459053
Unc45a	0.000380682	0.376067	0.053	0.035	1		Mgp	1.92168e-07	0.364684	0.363	0.322	0.00379858		Ier2	0	0.457902
Tsen15	0.000694139	0.375987	0.054	0.033	1		Parp2	0.00308314	0.364124	0.059	0.046	1		Nudt5	0	0.457189
Twf1	0.000339322	0.375867	0.041	0.026	1		Supt7l	0.00122581	0.363914	0.036	0.025	1		Rarres2	0	0.456809
Mmp27	0.0680978	0.375722	0.01	0.006	1		Chek2	0.0396019	0.363675	0.025	0.02	1		Pdgfra	0	0.454829
Fzr1	0.00394468	0.37571	0.028	0.016	1		Tomm22	0.00701274	0.363606	0.024	0.017	1		Rexo1	0	0.454793
E4f1	5.97395e-05	0.375389	0.076	0.045	1		Ilvbl	0.00980091	0.363593	0.024	0.017	1		Atp5k	0	0.451377
Ang	0.0469098	0.375361	0.021	0.013	1		Ndufs7	0.00911071	0.363537	0.051	0.041	1		Tbrg1	0	0.450527
Tbcel	8.82644e-13	0.375309	0.185	0.123	1.74472e-08		Rbbp9	0.0320559	0.363138	0.021	0.016	1		Thap2	0	0.449839
Pdlim1	1.21141e-07	0.375221	0.183	0.13	0.0023946		Calm1	5.68676e-06	0.362991	0.129	0.102	0.11241		Arfip2	0	0.44937
Arv1	0.0472375	0.375118	0.041	0.026	1		Xndc1	0.00175898	0.362933	0.055	0.042	1		Nagk	0	0.449201
Slc5a3	0.0162552	0.374889	0.024	0.014	1		Ppa1	0.00431323	0.362702	0.023	0.016	1		Fam177a	0	0.448735
Rpl37	0.0219341	0.374646	0.037	0.024	1		Vezf1	1.83444e-10	0.362389	0.201	0.153	3.62615e-06		Flii	0	0.447973
Rnf34	0.000659725	0.374405	0.044	0.025	1		Wnk3	0.083175	0.361876	0.013	0.01	1		Tatdn1	0	0.447855
Tmem86b	0.125055	0.374323	0.017	0.008	1		Zfp128	0.00193885	0.361703	0.015	0.009	1		Cops8	0	0.447571
Pcsk6	3.51566e-29	0.374285	0.799	0.702	6.9494e-25		Mrps15	2.62386e-05	0.361661	0.061	0.043	0.518658		BC031181	0	0.445697
Rpl41	0.771831	0.374277	0.058	0.04	1		Htra2	0.00202393	0.361533	0.077	0.062	1		Ttc14	0	0.444134
Hnrnpa1	3.26313e-05	0.374138	0.078	0.055	0.645022		Rps6ka1	0.033265	0.361263	0.011	0.007	1		Ly6a	0	0.444016
Zfp930	0.139286	0.373547	0.024	0.015	1		Aspscr1	6.60941e-05	0.361149	0.072	0.054	1		Vti1b	0	0.443496
Rab3a	0.12533	0.373378	0.012	0.008	1		St13	9.24001e-08	0.360995	0.188	0.15	0.00182647		Marveld1	0	0.442871
Lrrc36	0.00123261	0.373316	0.054	0.036	1		Arpc3	3.10075e-11	0.360809	0.185	0.138	6.12925e-07		Ptp4a1	0	0.439737
Rcor3	1.2445e-08	0.37315	0.154	0.1	0.000246001		Ddx1	6.39783e-06	0.360624	0.109	0.084	0.126466		Gapdh	0	0.437822
Rrp7a	0.0487761	0.372754	0.022	0.013	1		Glrx2	0.000503426	0.360394	0.052	0.038	1		Tbc1d20	0	0.433755
Nxt2	0.247952	0.372751	0.012	0.008	1		Hdgf	0.000667765	0.360385	0.076	0.06	1		Atp5j2	0	0.431768
Fndc1	9.10003e-33	0.372724	0.599	0.443	1.7988e-28		Kctd11	0.213907	0.360236	0.014	0.011	1		Nfe2l2	0	0.429842
Tspan31	0.504963	0.37208	0.019	0.015	1		Ubc	3.70523e-12	0.359767	0.358	0.299	7.32413e-08		Stard5	0	0.42895
Abhd8	0.655601	0.372014	0.02	0.013	1		Mgat2	0.127575	0.35943	0.019	0.015	1		Tmem263	0	0.428876
Hcfc1r1	0.488192	0.37185	0.021	0.015	1		Lrrc39	0.000473274	0.359185	0.057	0.043	1		Cox6c	0	0.42771
Mxra7	8.05548e-21	0.37177	0.413	0.297	1.59233e-16		Nudc	0.000819587	0.359092	0.042	0.03	1		Arpc5	0	0.427481
Rab30	9.56856e-10	0.371557	0.194	0.12	1.89142e-05		Bcl7c	6.74517e-07	0.358995	0.122	0.093	0.0133332		Hnrnpa2b1	0	0.426256
Uqcrfs1	0.102227	0.371202	0.012	0.015	1		Cct4	1.473e-05	0.3589	0.109	0.084	0.291168		Prr14	0	0.423097
Impad1	0.030619	0.37107	0.05	0.034	1		Eif4ebp1	0.051986	0.358606	0.046	0.039	1		Gas1	0	0.422093
Oaz2	0.00168645	0.37087	0.081	0.05	1		Zfp958	0.00179732	0.358542	0.041	0.03	1		Mrps17	0	0.420593
Elk3	6.04014e-09	0.370191	0.144	0.093	0.000119395		Arl1	0.00019382	0.358142	0.073	0.056	1		Ppp1r10	0	0.416211
Ccl25	1.70001e-10	0.370181	0.125	0.077	3.36042e-06		Lix1	0.0268662	0.357839	0.013	0.009	1		Pstk	0	0.415712
Cdk16	0.00211251	0.36998	0.077	0.053	1		Ubald2	0.0124313	0.357307	0.045	0.035	1		Rps9	0	0.414359
Donson	0.0537342	0.369647	0.023	0.014	1		Dctn4	1.61046e-11	0.357282	0.271	0.216	3.18339e-07		Armcx1	0	0.413882
Ddx18	8.13575e-07	0.369644	0.073	0.046	0.0160819		Eno2	0.0040842	0.357188	0.033	0.024	1		Gpkow	0	0.412889
Slirp	0.156018	0.369459	0.026	0.018	1		Ptpn13	0.131748	0.357088	0.039	0.034	1		Copb2	0	0.412559
Ascc1	0.000268233	0.369374	0.046	0.029	1		Optn	0.000267367	0.356977	0.075	0.058	1		Rassf1	0	0.411451
Hook2	0.00264555	0.369242	0.026	0.014	1		Ubr7	0.0171196	0.35693	0.045	0.036	1		Map2k2	0	0.41135
Thpo	0.153317	0.368826	0.013	0.009	1		Ubald1	0.0202711	0.356906	0.037	0.029	1		Glt8d1	0	0.410602
Rhob	0.193309	0.36882	0.037	0.031	1		Tmbim4	0.000233938	0.35681	0.1	0.08	1		Lztfl1	0	0.409999
P4ha2	0.00226734	0.368152	0.083	0.045	1		Itgb3	0.0856307	0.356748	0.022	0.018	1		Hmgn3	0	0.408609
Epas1	1.37535e-14	0.367509	0.24	0.162	2.71865e-10		Nom1	2.08437e-06	0.356319	0.108	0.082	0.0412018		Rrnad1	0	0.405137
Pacsin2	5.0453e-08	0.367001	0.195	0.12	0.000997304		Ap2m1	0.0604253	0.356214	0.045	0.038	1		Actg1	0	0.402318
Cnppd1	1.86556e-06	0.366711	0.055	0.034	0.0368765		Zfp81	0.000837032	0.356119	0.052	0.039	1		Slc7a6os	0	0.399069
Eif4e2	1.34258e-06	0.366602	0.099	0.063	0.0265388		Serpinf1	0.00144722	0.356063	0.067	0.053	1		Fam133b	0	0.398879
Oat	0.0337433	0.366218	0.012	0.007	1		Esf1	7.73573e-07	0.355948	0.143	0.112	0.0152912		Rps11	0	0.396345
Mapkbp1	1.24523e-05	0.365861	0.099	0.062	0.246144		Plekha4	3.40183e-06	0.355932	0.09	0.066	0.0672439		Timmdc1	0	0.396129
Chmp2a	0.963053	0.365647	0.024	0.015	1		Wdr46	0.0986301	0.355906	0.012	0.009	1		Malsu1	0	0.394472
Zkscan5	0.0234553	0.365229	0.024	0.012	1		Lmna	1.37459e-08	0.355818	0.201	0.159	0.000271715		Entpd2	0	0.393406
Nab2	0.011599	0.365153	0.031	0.02	1		Prdx5	0.00186784	0.355758	0.036	0.026	1		Cd302	0	0.38844
Safb	8.34389e-11	0.365118	0.166	0.113	1.64934e-06		Trim46	0.000305244	0.355737	0.046	0.033	1		Aspa	0	0.387164
Rnf167	0.000417385	0.364693	0.092	0.063	1		Vash1	0.000867778	0.35568	0.054	0.041	1		Tmem165	0	0.384714
Usp21	0.00968091	0.364682	0.032	0.019	1		Arl5b	1.53055e-11	0.355595	0.239	0.186	3.02544e-07		Trim34a	0	0.384593
Cetn3	0.0687521	0.364237	0.041	0.027	1		Sirt5	0.000162224	0.355285	0.059	0.043	1		Nvl	0	0.383714
Mob3a	0.00290863	0.364188	0.047	0.034	1		Pet100	0.00438382	0.355074	0.049	0.038	1		Gnl3	0	0.383475
Opcml	0.032523	0.363648	0.012	0.007	1		Pex13	1.85299e-05	0.354953	0.099	0.076	0.36628		Adgrd1	0	0.382852
Cers6	1.018e-12	0.36349	0.218	0.148	2.01228e-08		Plvap	0.124046	0.354758	0.01	0.007	1		Adamtsl3	0	0.382582
Ndufaf1	0.382682	0.36336	0.018	0.015	1		Btbd1	8.93979e-14	0.35448	0.273	0.211	1.76713e-09		Fam210a	0	0.381167
Grk6	0.0405991	0.363114	0.052	0.031	1		Smg5	2.01793e-05	0.35442	0.115	0.09	0.398885		Lrrtm3	0	0.380829
Mrpl24	0.00128881	0.363107	0.053	0.032	1		Ethe1	0.206003	0.354291	0.025	0.021	1		Rchy1	0	0.379772
Wrnip1	0.137764	0.361915	0.045	0.033	1		Slc35b2	0.0523959	0.354289	0.019	0.014	1		Pi16	0	0.379462
Pik3c2b	0.0189886	0.361874	0.037	0.021	1		Mxra8	2.39535e-10	0.354263	0.205	0.159	4.73489e-06		Sft2d1	0	0.378789
Ccdc162	0.235837	0.36185	0.012	0.007	1		Mypop	0.00141151	0.354025	0.033	0.022	1		Gle1	0	0.378345
Gramd1a	1.24054e-05	0.361692	0.077	0.048	0.245218		Mettl3	0.000260309	0.354016	0.066	0.05	1		Serpinb6a	0	0.378302
Slc41a1	0.0270148	0.361576	0.035	0.022	1		Actr5	0.000194409	0.353959	0.043	0.029	1		Lsp1	0	0.376062
Mapkapk2	0.00015029	0.361548	0.1	0.066	1		Acadvl	0.00379217	0.353875	0.045	0.035	1		Crot	0	0.375341
Idh3g	0.301744	0.361523	0.035	0.022	1		Ndufa7	0.000200762	0.353872	0.078	0.06	1		Cd34	0	0.374162
Nkd2	0.000317464	0.361316	0.041	0.024	1		Rabac1	3.18158e-05	0.353443	0.106	0.083	0.628902		Eef1a1	0	0.373806
Ppil6	0.180611	0.361312	0.016	0.01	1		Mtg2	0.000409466	0.35331	0.073	0.056	1		Prpsap1	0	0.373798
Rpusd1	0.36556	0.361204	0.012	0.008	1		Itga5	2.97045e-12	0.353234	0.342	0.28	5.87168e-08		Vamp4	0	0.373469
Magi1	2.51092e-14	0.361079	0.158	0.099	4.96334e-10		Laptm4a	5.14486e-11	0.3531	0.233	0.182	1.01698e-06		Iffo1	0	0.372643
Pmm1	0.1464	0.360757	0.023	0.015	1		Rad50	5.92e-07	0.352997	0.159	0.125	0.0117021		Rufy2	0	0.371982
Plpp7	0.0241224	0.360616	0.017	0.011	1		Cdkn2c	0.132049	0.352706	0.022	0.018	1		Cd55	0	0.371792
Mark4	3.39935e-05	0.36056	0.087	0.058	0.671949		Tmem214	3.69942e-06	0.352451	0.117	0.091	0.0731265		Trmt13	0	0.37166
Ppp5c	0.128902	0.360545	0.029	0.019	1		Ap3m1	5.42146e-06	0.352239	0.105	0.079	0.107166		Strbp	0	0.368718
Rtel1	0.00896903	0.360292	0.046	0.028	1		Esd	0.000686866	0.352167	0.064	0.049	1		Prpf4b	0	0.367243
Zfp809	3.00163e-14	0.360181	0.24	0.164	5.93332e-10		Lsm1	0.00144388	0.3514	0.054	0.041	1		Ppwd1	0	0.366306
Ap1m1	0.000134038	0.360058	0.082	0.055	1		Nsun5	0.029387	0.351194	0.038	0.03	1		Gpr153	0	0.366165
Mrps24	0.522033	0.360007	0.037	0.026	1		Abcb8	0.0286142	0.35086	0.028	0.021	1		Vezf1	0	0.362389
Sag	0.144249	0.359742	0.017	0.011	1		Mrpl35	0.268231	0.35053	0.013	0.01	1		St13	0	0.360995
Fkrp	0.415179	0.359732	0.021	0.013	1		Ech1	0.000162454	0.350488	0.104	0.083	1		Arpc3	0	0.360809
Tfcp2	1.77765e-08	0.35917	0.148	0.093	0.000351388		Net1	0.210528	0.350462	0.013	0.011	1		Ubc	0	0.359767
Rybp	0.000492091	0.359051	0.078	0.056	1		Enpp6	0.0141551	0.350301	0.018	0.013	1		Bcl7c	0	0.358995
Derl2	0.00206839	0.359013	0.067	0.044	1		Hmgcl	0.000103008	0.349892	0.094	0.073	1		Dctn4	0	0.357282
Zfp944	4.8025e-06	0.358936	0.101	0.067	0.0949311		Zfp948	5.47357e-06	0.349871	0.151	0.122	0.108196		Nom1	0	0.356319
Csrp1	0.000237126	0.358643	0.078	0.054	1		Dbndd2	0.0200744	0.349611	0.022	0.016	1		Esf1	0	0.355948
Rfng	0.142243	0.35847	0.028	0.016	1		Fbxl8	0.0735767	0.349598	0.017	0.013	1		Arl5b	0	0.355595
Arhgap15	0.031696	0.358322	0.015	0.014	1		Rpl12	1.29961e-05	0.349478	0.089	0.067	0.256894		Btbd1	0	0.35448
Aldh2	2.55307e-14	0.358271	0.268	0.181	5.04666e-10		Zfp449	0.0111658	0.34947	0.032	0.024	1		Mxra8	0	0.354263
Ccdc112	0.0416993	0.358203	0.014	0.009	1		Gpn3	0.0124536	0.349433	0.039	0.031	1		Laptm4a	0	0.3531
Bach1	0.000105409	0.35815	0.066	0.041	1		Ccdc90b	0.000768443	0.349292	0.052	0.039	1		Rad50	0	0.352997
Ppp2r5c	1.96261e-17	0.358086	0.325	0.215	3.87949e-13		Smug1	0.0396055	0.34929	0.022	0.016	1		Lars	0	0.34698
Tsen34	0.0522694	0.357776	0.055	0.036	1		Nqo2	0.00813995	0.348916	0.048	0.037	1		Drg1	0	0.346926
Unc5a	0.101591	0.357613	0.027	0.02	1		Asb13	0.00103567	0.348857	0.068	0.053	1		Fam45a	0	0.346916
Gpsm3	0.910596	0.357556	0.012	0.007	1		Zswim7	0.00462999	0.348722	0.06	0.048	1		Hmgb1	0	0.346603
Pakap	4.19222e-12	0.35728	0.175	0.107	8.28677e-08		Mst1r	0.0170111	0.348708	0.05	0.04	1		Dcaf17	0	0.346542
Tnfrsf1b	9.02614e-07	0.357159	0.113	0.075	0.017842		Cyb561d1	0.170602	0.348612	0.013	0.01	1		Bbip1	0	0.345308
Zscan29	2.94014e-05	0.356532	0.052	0.032	0.581177		Neil1	0.00395766	0.348591	0.029	0.02	1		Nxpe2	0	0.344399
Grid2	0.141186	0.356507	0.015	0.009	1		Tmem19	0.00119043	0.348489	0.084	0.068	1		Hspa4	0	0.344096
Nelfa	0.000322511	0.356119	0.072	0.048	1		Scly	0.000972181	0.348187	0.106	0.088	1		Sipa1	0	0.34073
Ccdc88c	2.54382e-05	0.355898	0.048	0.032	0.502836		Nasp	4.02525e-06	0.347902	0.077	0.055	0.0795671		Sumo2	0	0.333915
Def6	0.00168964	0.355753	0.04	0.027	1		Acot13	7.3869e-05	0.347882	0.057	0.041	1		Thap3	0	0.333621
Kdsr	1.14948e-05	0.3557	0.062	0.04	0.227217		Rpl3	0.000684149	0.34787	0.098	0.08	1		Ttc19	0	0.333526
Cpox	0.515519	0.355096	0.033	0.022	1		Rdh11	0.0652664	0.347755	0.023	0.018	1		Mtif2	0	0.330432
Apbb2	7.03272e-24	0.355016	0.363	0.24	1.39016e-19		Svbp	0.0124244	0.347571	0.039	0.031	1		Lmo4	0	0.33032
Arid5b	1.2798e-15	0.35444	0.292	0.198	2.52978e-11		Rpl26	0.000589189	0.347183	0.062	0.047	1		Tmem59	0	0.329466
Whamm	1.35127e-06	0.35426	0.081	0.048	0.0267105		Lars	8.39701e-10	0.34698	0.198	0.153	1.65984e-05		Zfp397	0	0.326946
Ap2a1	0.000180017	0.354089	0.103	0.064	1		Drg1	2.74885e-11	0.346926	0.27	0.215	5.43366e-07		Pdpr	0	0.325217
Fbxo25	0.0159597	0.354032	0.042	0.022	1		Fam45a	7.0231e-07	0.346916	0.163	0.129	0.0138826		Ube2j1	0	0.324385
Pim2	0.350998	0.353979	0.011	0.007	1		Naa10	0.111663	0.346868	0.019	0.015	1		Rab5b	0	0.32292
Stx12	3.75666e-09	0.353824	0.15	0.099	7.42579e-05		Nxt2	0.0553501	0.346674	0.013	0.01	1		Zc3h15	0	0.322359
Lrrn4cl	0.00629338	0.35368	0.019	0.012	1		Prkab1	0.00127235	0.346669	0.047	0.035	1		Ggps1	0	0.319671
Nkiras1	0.00209692	0.353584	0.049	0.033	1		Exosc9	0.178322	0.346608	0.025	0.021	1		Swt1	0	0.317984
Dnmt3a	5.29894e-18	0.353514	0.257	0.167	1.04744e-13		Hmgb1	1.69869e-09	0.346603	0.208	0.164	3.35781e-05		Morf4l2	0	0.31643
Pnkp	6.20751e-05	0.353488	0.056	0.034	1		Dcaf17	9.79434e-07	0.346542	0.158	0.125	0.0193605		Tiparp	0	0.316046
Kctd11	0.0161745	0.353144	0.019	0.011	1		Amer1	0.00411139	0.346435	0.05	0.039	1		Srgap1	0	0.314763
Klhl6	5.64695e-07	0.352896	0.114	0.079	0.0111623		Tmem203	0.16386	0.346312	0.01	0.008	1		Traf5	0	0.313095
N4bp2l1	0.00990794	0.352677	0.045	0.029	1		Map1lc3a	0.0124288	0.346076	0.047	0.037	1		Adam9	0	0.308226
Mfsd11	0.0447309	0.352642	0.052	0.03	1		Islr	0.179463	0.345924	0.035	0.031	1		Xbp1	0	0.306536
Ptdss2	0.00782821	0.352331	0.039	0.028	1		Plin2	0.00437818	0.345734	0.127	0.11	1		Eif2s2	0	0.30627
Ppm1f	0.000239111	0.351587	0.024	0.013	1		Zbtb49	0.0409217	0.345655	0.031	0.025	1		Pnp	0	0.303037
Rbm19	0.0190088	0.350969	0.043	0.03	1		Bbip1	1.99403e-06	0.345308	0.145	0.115	0.039416		Dusp11	0	0.302917
Agbl5	0.504594	0.350612	0.02	0.012	1		Cgrrf1	3.7603e-05	0.34524	0.098	0.076	0.743298		Jmjd6	0	0.302773
Brms1l	7.87464e-06	0.350601	0.099	0.064	0.155658		Psmd8	0.000660256	0.345169	0.049	0.035	1		Nr6a1	0	0.29919
Man2c1	0.00202291	0.350575	0.058	0.036	1		Psmb6	0.0752252	0.345091	0.029	0.023	1		Zfp942	0	0.297417
Dynlt1a	7.46256e-07	0.350461	0.054	0.034	0.0147512		Usp31	0.00038496	0.344941	0.109	0.089	1		Smc6	0	0.295214
Abcb10	0.0318543	0.350416	0.064	0.046	1		Tbc1d31	0.00685903	0.344922	0.049	0.038	1		Scrn1	0	0.292878
Dock10	7.83429e-22	0.350219	0.454	0.331	1.5486e-17		Ndufa2	0.00516185	0.344819	0.05	0.039	1		Sec24c	0	0.292344
Plcxd3	4.63133e-05	0.34959	0.1	0.072	0.915475		Ndufb9	3.41411e-05	0.344737	0.079	0.059	0.674867		Kif2a	0	0.291981
Tenm4	1.54601e-05	0.349448	0.078	0.051	0.305599		H2-T22	0.00262695	0.344487	0.077	0.062	1		Prkab2	0	0.289621
Rpl7a	0.00200604	0.349228	0.038	0.025	1		Cyb5r1	0.0680431	0.344427	0.048	0.041	1		Snrnp48	0	0.289118
Msrb2	0.00272068	0.347998	0.032	0.019	1		Nxpe2	1.61457e-06	0.344399	0.076	0.053	0.0319152		Wasl	0	0.289068
Ago1	0.000194039	0.347961	0.069	0.048	1		Cldnd1	0.0193189	0.344396	0.036	0.028	1		Col27a1	0	0.288852
Fam162a	1.89248e-05	0.347924	0.078	0.048	0.374086		Slc39a13	6.83563e-06	0.344287	0.128	0.101	0.13512		Tpr	0	0.28812
Tbcb	0.00034497	0.347862	0.048	0.028	1		Sesn2	0.0959553	0.344223	0.012	0.009	1		Tmem234	0	0.287394
Skil	1.37235e-13	0.347764	0.16	0.108	2.71273e-09		Asb6	0.0162355	0.34412	0.026	0.019	1		Sdcbp	0	0.286997
Bnip2	0.000777669	0.347496	0.105	0.071	1		Hspa4	1.95634e-11	0.344096	0.256	0.203	3.86709e-07		Atp5a1	0	0.286602
Il17rd	4.767e-10	0.347236	0.181	0.126	9.42293e-06		Ccdc124	0.0469442	0.343521	0.017	0.012	1		Cap1	0	0.286335
Fam151b	0.000328656	0.346396	0.053	0.035	1		Tspyl5	0.588948	0.343333	0.014	0.012	1		Dnajc19	0	0.283218
Yars2	0.557184	0.345707	0.011	0.009	1		Neu3	0.0942635	0.343327	0.013	0.01	1		Sema3c	0	0.282043
Mrps17	0.0750064	0.345654	0.047	0.03	1		Polr2j	0.165105	0.343197	0.022	0.018	1		Ddhd2	0	0.281953
Rere	1.37004e-34	0.345491	0.757	0.615	2.70817e-30		Ap1m1	0.000130513	0.34318	0.094	0.074	1		Mysm1	0	0.281242
Hnrnpul1	1.2776e-09	0.345309	0.188	0.124	2.52542e-05		Derl2	0.00214787	0.342517	0.082	0.066	1		Rmdn1	0	0.281172
Fgf12	0.0143476	0.345067	0.032	0.015	1		C87436	0.000647736	0.342511	0.073	0.057	1		Rrbp1	0	0.280137
Actr3	3.73807e-09	0.344631	0.185	0.125	7.38904e-05		Bhlhe41	0.000789039	0.342477	0.053	0.04	1		Pcsk7	0	0.277869
Crat	0.045436	0.344439	0.022	0.014	1		Nab2	0.0570981	0.342383	0.024	0.019	1		H2-D1	0	0.277542
Mcm4	0.138257	0.344372	0.011	0.007	1		Pea15a	6.17211e-06	0.342149	0.118	0.092	0.122004		Steap3	0	0.274717
Vps52	0.039948	0.344136	0.03	0.017	1		Cnn2	3.76559e-05	0.342124	0.149	0.122	0.744344		Dusp3	0	0.274263
Gnpat	0.0597422	0.344039	0.065	0.043	1		Nt5m	0.00646581	0.342124	0.056	0.045	1		Psmc6	0	0.272202
Pole2	0.44457	0.343729	0.016	0.012	1		Siae	0.207468	0.342041	0.024	0.02	1		Trafd1	0	0.269883
Puf60	0.0048032	0.343629	0.058	0.039	1		Eif1ad	0.0718945	0.342035	0.022	0.017	1		Sec62	0	0.269362
Zfp619	0.0156559	0.343611	0.019	0.014	1		Ndufa4l2	0.00890553	0.341604	0.037	0.028	1		Prdx6	0	0.268788
Gtpbp6	0.117214	0.343606	0.029	0.018	1		Strap	0.0316036	0.34097	0.033	0.026	1		Asb3	0	0.266664
Ogdh	0.000163913	0.343482	0.063	0.036	1		Hif1an	0.0104131	0.340872	0.058	0.047	1		Fam76b	0	0.265981
Por	7.18241e-18	0.343338	0.26	0.182	1.41975e-13		Sipa1	4.07029e-10	0.34073	0.223	0.175	8.04575e-06		Cyp2d22	0	0.265653
Arap1	3.33957e-07	0.343263	0.1	0.065	0.00660132		Cuta	0.00546091	0.340726	0.035	0.026	1		Socs2	0	0.264506
Abca6	8.16208e-24	0.343195	0.628	0.499	1.6134e-19		Bbs5	0.0028095	0.340402	0.042	0.031	1		Fubp1	0	0.264147
Surf6	0.15439	0.342781	0.022	0.015	1		Lzts3	0.0812642	0.340365	0.014	0.011	1		Usp46	0	0.262583
Slc35b4	0.0819915	0.34276	0.028	0.019	1		Bivm	0.0148149	0.340121	0.04	0.031	1		Col4a3	0	0.261939
Pfdn6	0.89288	0.342728	0.012	0.009	1		Il17ra	0.00129549	0.339912	0.098	0.081	1		Srsf10	0	0.261317
Dnm2	1.51035e-18	0.341884	0.334	0.225	2.98551e-14		Vps51	0.00294206	0.339891	0.035	0.025	1		H3f3b	0	0.259786
Safb2	5.9856e-10	0.341407	0.179	0.117	1.18317e-05		Commd1	0.341846	0.339814	0.012	0.01	1		Phykpl	0	0.258601
Rrp1b	0.000132059	0.341336	0.047	0.029	1		Surf1	0.106889	0.339673	0.02	0.016	1		Snx3	0	0.25812
Ltbp4	1.05135e-25	0.341324	0.572	0.439	2.0782e-21		Ciao1	0.00438656	0.339407	0.04	0.03	1		Dnajc3	0	0.255614
Ift140	4.25563e-07	0.341248	0.105	0.068	0.0084121		Clpp	3.51534e-05	0.338986	0.101	0.079	0.694876		Tpm4	0	0.255435
Rras2	3.07207e-09	0.341217	0.168	0.108	6.07255e-05		Zc3h12a	0.000225817	0.338953	0.093	0.074	1		Odf2	0	0.253641
Zfp30	0.0548608	0.341106	0.033	0.02	1		Slc25a11	0.0253976	0.338781	0.041	0.033	1		Pla2g4a	0	0.252383
Tpp1	0.0827481	0.34097	0.046	0.032	1		Ndufc2	0.00280991	0.338774	0.044	0.033	1		Mgrn1	0	0.249213
Cyp2j9	0.00240558	0.340546	0.044	0.03	1		Cyp4f17	0.00669798	0.338738	0.027	0.019	1		Mob4	0	0.245687
Abtb1	0.000149121	0.34049	0.038	0.025	1		Trmt2a	0.000175567	0.338649	0.061	0.045	1		Ldlrad3	0	0.244605
Arhgef19	0.17489	0.340149	0.038	0.02	1		Slc35b1	0.000303328	0.338305	0.059	0.044	1		Yipf5	0	0.24411
Ifitm5	0.472518	0.339865	0.012	0.007	1		Phf23	0.00983388	0.338057	0.046	0.036	1		Pnisr	0	0.243067
Tead1	1.25735e-22	0.339858	0.511	0.359	2.48541e-18		Jkamp	0.00011319	0.337673	0.088	0.068	1		Actb	0	0.242887
Polr2c	0.0653623	0.339544	0.03	0.018	1		Mphosph8	7.13064e-08	0.337652	0.173	0.136	0.00140951		Kdm3a	0	0.241986
Rab43	4.61571e-09	0.339142	0.114	0.072	9.12388e-05		Rpl21	0.000457228	0.337446	0.094	0.075	1		Zfp182	0	0.241494
Arglu1	1.16706e-19	0.339118	0.391	0.274	2.30693e-15		Ankrd61	0.418319	0.337445	0.011	0.01	1		Prrc1	0	0.239659
Zfp865	0.00107702	0.338627	0.036	0.022	1		Pomp	0.0136538	0.3374	0.04	0.031	1		Dhx36	0	0.235717
Smad6	6.81083e-07	0.338177	0.058	0.034	0.013463		Tmem132a	0.00698776	0.337282	0.014	0.009	1		Ndfip1	0	0.235199
Skiv2l	0.00278619	0.338019	0.055	0.036	1		Rbm15	0.00134597	0.33728	0.066	0.052	1		Gcc2	0	0.231963
Abhd5	0.00249233	0.337939	0.063	0.041	1		Tprkb	2.30398e-05	0.337269	0.077	0.057	0.455428		Psma3	0	0.231793
Col4a5	2.02342e-08	0.337599	0.173	0.118	0.000399969		Zbtb17	0.0655122	0.337138	0.038	0.032	1		Mtch1	0	0.230645
Zdhhc18	0.000219045	0.337584	0.084	0.056	1		Mrpl10	0.00135882	0.337111	0.06	0.046	1		Rab6a	0	0.229122
Rap2c	0.000256055	0.337566	0.056	0.033	1		Tarbp2	0.00420092	0.336814	0.048	0.037	1		Serping1	0	0.228959
Crim1	3.19535e-17	0.337445	0.243	0.164	6.31626e-13		Chchd10	0.00311145	0.336788	0.031	0.022	1		Phtf1	0	0.228335
Tnc	0.634204	0.33744	0.009	0.011	1		Rps13	0.00140401	0.336786	0.083	0.067	1		Msl1	0	0.227115
Polr3k	0.0717076	0.337392	0.016	0.01	1		Ankrd39	0.0408487	0.336644	0.035	0.028	1		Negr1	0	0.225971
Dpep1	4.14256e-21	0.337273	0.355	0.242	8.1886e-17		March5	2.83494e-06	0.336352	0.125	0.097	0.0560383		Fus	0	0.224783
Ranbp10	1.14918e-07	0.337239	0.118	0.08	0.00227157		Hells	0.109937	0.33628	0.016	0.013	1		Svep1	0	0.221557
Tmco3	0.000480246	0.336995	0.086	0.056	1		Fxn	0.216666	0.335952	0.028	0.025	1		Cbx1	0	0.221303
Exosc4	0.553855	0.336949	0.016	0.01	1		Dus4l	0.0190592	0.335944	0.044	0.035	1		Stx5a	0	0.22071
Crkl	1.94866e-07	0.33665	0.119	0.075	0.00385191		Pop7	0.12449	0.335534	0.01	0.007	1		Gon4l	0	0.216756
Dlst	2.33916e-07	0.33659	0.157	0.104	0.00462381		Dbn1	7.61958e-06	0.335118	0.107	0.082	0.150616		Arfgap3	0	0.216495
Ppic	9.80174e-05	0.33632	0.065	0.043	1		Adamts1	0.000290244	0.334973	0.194	0.169	1		Golga3	0	0.212633
Ywhag	2.46064e-06	0.336196	0.122	0.08	0.0486395		Mtfr1	0.00739688	0.334956	0.035	0.027	1		Abi2	0	0.208031
Opn3	0.0309194	0.335959	0.015	0.009	1		Col4a6	0.00860124	0.334626	0.104	0.089	1		Dync1i2	0	0.207423
Ruvbl2	0.0744947	0.335331	0.014	0.01	1		Hgf	0.150863	0.334312	0.018	0.014	1		Clk4	0	0.20623
Tbc1d25	0.0174533	0.335312	0.029	0.02	1		Zbtb48	0.0409611	0.33408	0.023	0.018	1		Phf3	0	0.205394
Plekha8	0.00111084	0.334822	0.067	0.048	1		Sumo2	2.59429e-09	0.333915	0.183	0.141	5.12814e-05		Col1a2	0	0.204886
Cdipt	0.00302842	0.334224	0.032	0.019	1		Plpp5	3.59945e-05	0.333889	0.095	0.073	0.711504		Nufip2	0	0.204266
Stat5a	0.0950842	0.334176	0.042	0.028	1		Kcp	6.19471e-07	0.333712	0.122	0.092	0.0122451		Morf4l1	0	0.20338
Prkcg	0.000722113	0.334108	0.055	0.036	1		Thap3	1.37127e-12	0.333621	0.31	0.249	2.7106e-08		Tcf25	0	0.200441
Zfp422	0.609432	0.333562	0.012	0.007	1		Bhlhe40	1.5339e-07	0.333566	0.22	0.181	0.00303207		Ttc3	0	0.199659
Rnf181	0.000104688	0.333417	0.058	0.035	1		Ttc19	2.70645e-12	0.333526	0.289	0.229	5.34984e-08		Ccnl1	0	0.197636
Hdac10	0.000476311	0.333297	0.036	0.024	1		Creb3	0.0397346	0.333421	0.034	0.027	1		Cdc37l1	0	0.193862
Kctd10	0.000381843	0.333085	0.038	0.027	1		Gnb5	0.0189565	0.333152	0.041	0.033	1		Arnt	0	0.19375
Cep85l	0.000121795	0.333028	0.208	0.12	1		Sulf2	8.27575e-05	0.333028	0.129	0.105	1		Pura	0	0.188239
Pias3	0.000621532	0.332937	0.096	0.065	1		Slc30a6	0.00394041	0.333005	0.07	0.056	1		Pds5a	0	0.182041
Pik3r3	8.01892e-06	0.332829	0.026	0.015	0.15851		Pqlc3	0.00336343	0.332843	0.04	0.029	1		Hnrnpa3	0	0.180933
Cib1	0.0690305	0.332458	0.013	0.01	1		Sf3b4	0.243435	0.332738	0.013	0.011	1		Sntb2	0	0.171926
Esyt1	0.000142592	0.332303	0.071	0.049	1		Sox9	0.0252343	0.332738	0.039	0.031	1		Pak2	0	0.169961
Lsm2	0.0252656	0.332222	0.023	0.016	1		Scyl1	0.000322375	0.332489	0.076	0.059	1		Sec24a	0	0.1664
Abl1	6.33904e-15	0.332095	0.298	0.217	1.25304e-10		Lrrc24	0.276587	0.33208	0.013	0.011	1		Zfp950	0	0.164441
Zfp568	0.000155117	0.331999	0.068	0.047	1		Copg1	9.25142e-05	0.331956	0.132	0.108	1		Akap9	0	0.161944
Sf3a1	0.0571031	0.331427	0.039	0.022	1		Oxnad1	2.64082e-05	0.331486	0.125	0.1	0.522011		Dcaf6	0	0.158219
Sdad1	9.14126e-05	0.331356	0.065	0.043	1		Rpl23a	0.00359499	0.331172	0.034	0.025	1		Nrd1	0	0.157486
Fstl1	5.23712e-18	0.331303	0.649	0.535	1.03522e-13		Ptcd2	0.12765	0.331162	0.044	0.038	1		Spag9	0	0.155497
Glp2r	0.0929434	0.331223	0.028	0.019	1		Shc2	0.0241593	0.331156	0.049	0.04	1		Cpq	0	0.154729
Degs1	0.129233	0.331085	0.037	0.026	1		Nkiras1	0.00395337	0.331105	0.069	0.056	1		Cul1	0	0.149088
Zcchc8	7.70191e-06	0.331026	0.123	0.085	0.152244		Ctsh	0.00250099	0.33103	0.051	0.039	1		Tra2b	0	0.146339
N6amt1	0.0092442	0.330765	0.038	0.024	1		Coa5	0.0916627	0.330723	0.017	0.013	1		Klf3	0	0.129894
Aktip	0.00104734	0.3307	0.072	0.049	1		Tle6	0.0136023	0.330663	0.031	0.023	1		Zeb1	0	0.128868
Plcb4	3.23608e-22	0.330563	0.398	0.29	6.39676e-18		Mtif2	1.849e-07	0.330432	0.18	0.143	0.00365492		Arf4	0	0.128599
D2hgdh	0.0845518	0.330552	0.044	0.027	1		Dbr1	0.1994	0.330421	0.014	0.012	1		Nfib	0	-0.107653
Atp6v1c1	0.00010333	0.33048	0.077	0.055	1		Lmo4	2.38374e-06	0.33032	0.161	0.13	0.0471194		Pard3b	0	-0.111128
Akap8	4.62678e-06	0.330458	0.141	0.09	0.0914576		Serpine1	0.00725769	0.330227	0.27	0.251	1		Nfia	0	-0.119871
Prkca	7.83726e-18	0.33032	0.498	0.361	1.54919e-13		Gfer	0.00494577	0.329935	0.02	0.013	1		Pcdh9	0	-0.122827
Tspan17	4.66163e-05	0.330278	0.053	0.035	0.921464		Dkc1	0.0136337	0.329697	0.041	0.032	1		Sox5	0	-0.130813
Gigyf1	2.00835e-07	0.330152	0.127	0.084	0.0039699		Tmem59	1.80659e-06	0.329466	0.13	0.101	0.0357109		Sgcd	0	-0.130895
Cyth1	2.16146e-07	0.330136	0.112	0.069	0.00427256		Nars	9.98847e-05	0.329353	0.1	0.079	1		Auts2	0	-0.136158
Med7	0.0282374	0.329934	0.039	0.024	1		Tmsb4x	1.84014e-08	0.329198	0.336	0.29	0.00036374		Arid1b	0	-0.140933
Crispld1	0.0639882	0.329787	0.012	0.006	1		Lum	9.19628e-05	0.329005	0.093	0.072	1		Rbms1	0	-0.142654
Iqcd	0.0217003	0.329714	0.013	0.008	1		Kxd1	7.30431e-05	0.329	0.081	0.061	1		Atxn1	0	-0.147884
Hira	3.78252e-14	0.329711	0.152	0.092	7.4769e-10		Ngdn	0.000343084	0.328933	0.058	0.043	1		Ebf2	0	-0.148809
Cercam	2.02486e-05	0.329518	0.036	0.02	0.400255		Proser3	0.298518	0.328797	0.018	0.015	1		Pid1	0	-0.153848
Gna14	1.51348e-06	0.329466	0.106	0.075	0.029917		Psmd12	3.24678e-06	0.328708	0.136	0.108	0.064179		Sbf2	0	-0.154605
Cstf1	0.155602	0.329141	0.021	0.014	1		Fam98a	0.0012173	0.328708	0.081	0.065	1		Zfpm2	0	-0.156044
Basp1	0.0203785	0.329018	0.061	0.047	1		S100a11	0.00302884	0.328697	0.07	0.056	1		Mecom	0	-0.161684
Srpk1	5.46127e-07	0.328955	0.114	0.075	0.0107953		Tln1	8.90102e-07	0.328573	0.171	0.138	0.0175947		Pard3	0	-0.16401
Eps15l1	3.12639e-10	0.328896	0.248	0.173	6.17993e-06		Rtkn	0.000116032	0.328388	0.087	0.067	1		Gnaq	0	-0.167541
Prpf31	0.232871	0.328421	0.027	0.018	1		Gadd45a	0.069122	0.328366	0.014	0.011	1		Exoc4	0	-0.168681
Nr1h4	2.4983e-08	0.328246	0.136	0.096	0.000493839		Psmc3	0.000615544	0.328325	0.058	0.043	1		Psd3	0	-0.176702
Rad51b	3.91473e-06	0.328242	0.064	0.044	0.0773824		Prdx2	0.00131651	0.328265	0.059	0.045	1		Heg1	0	-0.180549
Pih1d1	0.00194906	0.328054	0.032	0.019	1		Aldh18a1	0.0036068	0.32819	0.079	0.065	1		Fto	0	-0.182325
Pbx2	0.00121664	0.327875	0.031	0.018	1		Csmd3	0.184063	0.328104	0.012	0.01	1		Tnrc6b	0	-0.184054
Mier2	0.156953	0.32763	0.02	0.012	1		Orai1	0.00687182	0.328021	0.058	0.047	1		Dennd1a	0	-0.190592
Ndufa4l2	0.462688	0.327541	0.029	0.019	1		Sh3glb2	0.0679635	0.327955	0.051	0.044	1		Fndc3b	0	-0.199198
Bbs1	0.00514677	0.327437	0.019	0.01	1		Ddx5	1.64432e-40	0.327741	0.809	0.731	3.25034e-36		Jarid2	0	-0.205971
Sptbn1	7.75255e-45	0.32731	0.9	0.798	1.53245e-40		Plau	0.159623	0.327525	0.013	0.01	1		Dlc1	0	-0.212521
Limd1	3.20026e-18	0.327301	0.273	0.186	6.32595e-14		Nop14	0.00331511	0.327284	0.069	0.056	1		Nav1	0	-0.213877
Dnajc17	0.0208464	0.327242	0.025	0.019	1		Gngt2	0.658305	0.32728	0.011	0.01	1		Flt1	0	-0.216237
Fads2	0.000309343	0.327114	0.069	0.044	1		Arl4a	0.000200398	0.327108	0.071	0.054	1		Syne2	0	-0.223288
Psmg3	0.0245821	0.32681	0.013	0.008	1		Mapk7	0.0240077	0.326975	0.036	0.028	1		Rftn1	0	-0.224047
Stard3	0.0171943	0.326687	0.022	0.015	1		Zfp397	4.3164e-08	0.326946	0.148	0.112	0.000853224		Rnf150	0	-0.230772
Rsl1d1	0.00798336	0.326543	0.064	0.047	1		Emc6	0.169038	0.326873	0.014	0.011	1		Col5a3	0	-0.241746
Ptpn13	0.459603	0.326515	0.033	0.026	1		Rexo4	0.000193066	0.326866	0.088	0.069	1		Smyd3	0	-0.247252
Msh6	0.000835905	0.326215	0.021	0.013	1		D10Wsu102e	0.00229316	0.326752	0.026	0.017	1		Peak1	0	-0.248358
Zfp362	0.0208249	0.325855	0.055	0.036	1		Nme6	0.0826529	0.326692	0.029	0.024	1		Ror1	0	-0.2552
Tmem100	0.00521092	0.325822	0.026	0.02	1		H2-T24	0.0248901	0.326591	0.027	0.02	1		Rasa3	0	-0.261647
Zmpste24	8.4993e-05	0.325662	0.065	0.043	1		Ppcs	0.375019	0.326518	0.012	0.01	1		Ccdc85a	0	-0.266986
Zbtb48	0.235614	0.325514	0.018	0.013	1		Yars2	0.215637	0.326346	0.015	0.012	1		Ksr1	0	-0.267916
Osbpl8	8.20607e-08	0.325378	0.208	0.142	0.00162209		Bag4	0.0443483	0.325945	0.048	0.04	1		Pitpnc1	0	-0.268946
Pls3	4.27655e-13	0.325091	0.247	0.169	8.45346e-09		Rundc1	0.00439056	0.325891	0.048	0.037	1		Acss3	0	-0.269704
Arhgef10l	3.10749e-09	0.324911	0.216	0.145	6.14258e-05		Prrg4	0.073342	0.325858	0.01	0.007	1		Phactr1	0	-0.274035
Tars2	0.00335263	0.324599	0.046	0.03	1		Tamm41	0.142052	0.325735	0.027	0.022	1		Tnik	0	-0.283079
Cactin	0.0116308	0.324484	0.017	0.011	1		Rps15a	0.000247572	0.325573	0.093	0.073	1		Ptprk	0	-0.290277
Slc39a9	0.000407391	0.324322	0.096	0.061	1		Fiz1	0.00579482	0.325559	0.052	0.041	1		Ankrd44	0	-0.296891
Abca8b	6.10355e-21	0.324279	0.713	0.6	1.20649e-16		Suclg1	8.1362e-05	0.325559	0.085	0.065	1		Mitf	0	-0.300472
Rasl12	0.00890047	0.324277	0.043	0.03	1		Nelfe	0.00165922	0.325352	0.02	0.012	1		Cyth3	0	-0.302647
Rbm10	4.06402e-08	0.324193	0.12	0.076	0.000803335		Isg20l2	0.0740012	0.32535	0.038	0.032	1		Rps6ka5	0	-0.308131
Nifk	0.22112	0.324188	0.017	0.012	1		Pdpr	3.76176e-07	0.325217	0.155	0.121	0.00743587		Nrp1	0	-0.309129
Zfp605	0.202838	0.323728	0.013	0.008	1		Poglut1	0.00130427	0.325203	0.056	0.043	1		Man2a1	0	-0.311168
Armc10	0.00943732	0.323723	0.028	0.018	1		Ppia	3.51737e-05	0.325197	0.113	0.089	0.695278		Rgs6	0	-0.312489
Dbnl	0.00514408	0.323555	0.043	0.027	1		Rpl22	0.00206726	0.324961	0.069	0.055	1		Med13l	0	-0.314279
Stk25	1.09365e-07	0.323438	0.153	0.105	0.00216182		Ccdc134	0.0278468	0.324865	0.03	0.023	1		Nrxn1	0	-0.316323
Cherp	0.000243911	0.323395	0.092	0.062	1		Ackr3	1.09074e-05	0.32465	0.197	0.165	0.215606		Hivep3	0	-0.317884
Pisd	0.000368399	0.32331	0.045	0.028	1		Hexa	4.65675e-05	0.32456	0.098	0.076	0.920499		Ralgapa2	0	-0.319038
Osbpl10	0.00931825	0.322955	0.056	0.039	1		Bag5	0.0755969	0.324553	0.027	0.022	1		Slco2b1	0	-0.320593
Gclm	0.000378789	0.322816	0.046	0.031	1		Ube2j1	2.17535e-08	0.324385	0.171	0.132	0.000430001		Slit2	0	-0.328119
Atg16l1	1.59471e-05	0.322794	0.152	0.104	0.315226		Ppih	0.0513543	0.324376	0.026	0.021	1		Atp2a2	0	-0.335385
Laptm4b	5.55999e-06	0.322689	0.138	0.098	0.109904		Chchd4	0.0159968	0.324328	0.023	0.016	1		Cpeb3	0	-0.338196
Lyrm2	0.0356914	0.322035	0.027	0.017	1		Cox20	0.00163017	0.324027	0.045	0.034	1		Tshz3	0	-0.339045
Cd44	3.8996e-05	0.321935	0.084	0.055	0.770833		Rhno1	0.0481444	0.323927	0.037	0.03	1		Agap1	0	-0.340167
Dynll1	2.98659e-06	0.321724	0.097	0.072	0.0590358		Tmx2	0.150636	0.323923	0.013	0.01	1		Gramd4	0	-0.340582
Stk35	8.94215e-05	0.321681	0.037	0.023	1		Klf4	0.000114642	0.323858	0.261	0.233	1		Dennd5b	0	-0.342734
Vars2	0.162225	0.321564	0.018	0.012	1		Arl3	6.14548e-06	0.323821	0.174	0.144	0.121478		Foxo3	0	-0.345112
Scand1	0.106024	0.321513	0.039	0.026	1		Emc3	0.000471935	0.323787	0.098	0.079	1		Akap7	0	-0.347108
Rab40b	0.00557975	0.321415	0.034	0.026	1		Fastkd1	0.0229501	0.323633	0.044	0.036	1		Arhgap26	0	-0.348683
Ccdc93	2.06882e-05	0.321311	0.1	0.066	0.408945		Cyp2j9	0.0125542	0.32347	0.033	0.025	1		Angpt1	0	-0.354064
Tifa	3.77457e-05	0.32107	0.042	0.025	0.746119		Pak1ip1	0.00167138	0.323307	0.054	0.042	1		Pxdn	0	-0.358148
Fbxl20	1.25618e-12	0.320899	0.274	0.186	2.48309e-08		Gusb	0.00099339	0.323228	0.086	0.069	1		Tek	0	-0.360545
Ctnnal1	0.0122186	0.320517	0.066	0.041	1		Uqcr11	4.40416e-05	0.323004	0.072	0.053	0.87057		Sorbs1	0	-0.368483
Dtx3l	0.177948	0.320244	0.039	0.027	1		Zfp964	0.0976338	0.322939	0.015	0.012	1		Ppara	0	-0.369779
Irak2	0.151867	0.320184	0.034	0.025	1		Rab5b	2.15867e-07	0.32292	0.161	0.127	0.00426704		Cyyr1	0	-0.373714
Ghitm	0.77024	0.320156	0.036	0.029	1		Tcea1	4.03765e-06	0.322741	0.125	0.098	0.0798122		Immp2l	0	-0.375167
Ahnak	1.02494e-21	0.320132	0.507	0.383	2.02599e-17		Fam92a	0.000387328	0.322593	0.098	0.079	1		Hibadh	0	-0.375631
Swap70	4.50963e-07	0.320101	0.125	0.085	0.00891419		Magohb	0.0271235	0.322524	0.015	0.01	1		Epb41	0	-0.385497
Fkbp4	0.135165	0.319997	0.034	0.025	1		Cacnb3	0.331396	0.322401	0.014	0.012	1		Glis3	0	-0.387481
Bloc1s6	0.223654	0.319639	0.012	0.006	1		Pcdhb19	0.169322	0.322375	0.016	0.013	1		Csgalnact1	0	-0.390152
Mphosph8	2.61868e-08	0.319624	0.159	0.109	0.000517634		Zc3h15	1.51921e-07	0.322359	0.185	0.148	0.00300303		Spon1	0	-0.396226
Hinfp	0.0397064	0.319608	0.037	0.025	1		Samd9l	1.51219e-05	0.322279	0.104	0.08	0.298915		Tcp11l2	0	-0.403768
Kpna3	4.96305e-11	0.319377	0.175	0.117	9.81046e-07		Flrt2	6.82092e-09	0.321737	0.144	0.107	0.000134829		Nnt	0	-0.407146
Zcchc14	2.16456e-14	0.319357	0.258	0.177	4.27868e-10		Spr	0.0402485	0.321714	0.037	0.03	1		Ndrg2	0	-0.408056
Atp5g2	0.451171	0.319351	0.04	0.027	1		Anxa1	6.31249e-06	0.321702	0.193	0.16	0.124779		Fam49a	0	-0.408921
Nle1	0.0694819	0.319342	0.025	0.017	1		Rpl5	3.69721e-06	0.321625	0.096	0.071	0.0730828		Maml3	0	-0.415126
Pomt1	0.00250858	0.319218	0.038	0.022	1		Pdk1	0.000353914	0.321519	0.05	0.036	1		Ntn1	0	-0.425883
Gtf2i	1.46909e-15	0.319184	0.284	0.2	2.90394e-11		Cldn5	0.000604229	0.321469	0.036	0.025	1		Ngf	0	-0.42832
Pdlim5	7.26973e-26	0.318802	0.271	0.188	1.43701e-21		Rgs10	0.0276732	0.321256	0.027	0.021	1		Pparg	0	-0.429892
Mertk	2.75318e-07	0.318346	0.096	0.065	0.00544221		Sh3bgrl3	0.0244178	0.320921	0.021	0.015	1		Adgrl4	0	-0.431879
Prkar1a	0.00505403	0.318263	0.11	0.068	1		Cox7a1	0.0104818	0.320824	0.038	0.029	1		Ctnna3	0	-0.436421
Smim12	0.647957	0.317996	0.012	0.009	1		Lrp10	0.0065965	0.320751	0.048	0.037	1		Ggt5	0	-0.441975
Brd3	1.46803e-08	0.317846	0.143	0.096	0.000290185		Exoc7	0.000148938	0.320724	0.073	0.055	1		Bckdhb	0	-0.447128
Eml1	1.53881e-13	0.317833	0.286	0.193	3.04176e-09		Trp53rka	0.189554	0.320702	0.014	0.011	1		Lvrn	0	-0.450889
Myl12b	1.83557e-08	0.3178	0.152	0.105	0.000362838		G6pdx	0.00107619	0.320544	0.062	0.047	1		Cecr2	0	-0.452783
Tubgcp4	1.45495e-06	0.317358	0.119	0.081	0.02876		Cyb5r3	0.0566034	0.320359	0.022	0.017	1		Ivns1abp	0	-0.453143
Traf7	0.00885956	0.317294	0.07	0.049	1		Tox2	0.699176	0.32022	0.02	0.019	1		Ttn	0	-0.454668
Eepd1	0.0194243	0.317194	0.072	0.048	1		Aup1	0.00334084	0.320029	0.065	0.052	1		Pkp4	0	-0.455671
Anxa2	5.84238e-14	0.317149	0.267	0.188	1.15486e-09		Ogfrl1	0.0215903	0.319761	0.042	0.034	1		Synpo2	0	-0.456339
Car8	0.0665342	0.317128	0.039	0.031	1		Ggps1	4.0023e-09	0.319671	0.184	0.142	7.91134e-05		Adgrf5	0	-0.460228
Mrps18a	0.129838	0.316784	0.038	0.027	1		Arpc1b	1.29488e-07	0.319641	0.201	0.163	0.00255958		Cdh13	0	-0.466622
Rsl1	0.488733	0.316782	0.015	0.009	1		Desi1	0.000258483	0.3194	0.087	0.069	1		Gtdc1	0	-0.46664
Magoh	0.17926	0.316715	0.021	0.014	1		Rps27rt	0.068006	0.319288	0.018	0.014	1		Dysf	0	-0.468658
Rnf215	0.00648653	0.316694	0.045	0.031	1		Bzw1	5.96269e-05	0.319277	0.122	0.098	1		Tmtc2	0	-0.471959
Sf3a2	0.105858	0.316479	0.016	0.008	1		Polr2h	0.0680442	0.31883	0.047	0.04	1		Galnt15	0	-0.473296
Tmem123	0.000227192	0.316297	0.088	0.068	1		Oxa1l	0.000265441	0.318619	0.074	0.057	1		Cbfa2t3	0	-0.482642
Mcoln1	2.76895e-05	0.315928	0.044	0.026	0.547339		Opcml	0.480923	0.318617	0.034	0.037	1		Dhrs3	0	-0.484896
Pvr	0.0829431	0.315921	0.03	0.023	1		Ucp2	0.362089	0.318578	0.011	0.009	1		Glul	0	-0.492098
Ppp1r15b	0.00625949	0.31584	0.042	0.028	1		Ddx20	0.018755	0.318005	0.045	0.036	1		Vegfa	0	-0.497721
Elof1	0.0207124	0.315793	0.014	0.009	1		Swt1	2.29506e-13	0.317984	0.283	0.221	4.53664e-09		Mtss1	0	-0.501448
Msra	6.10587e-05	0.315722	0.147	0.097	1		Tmed7	0.00149144	0.317838	0.063	0.049	1		Ltbp1	0	-0.508862
Spock2	0.055719	0.315516	0.014	0.009	1		Ppp2r3c	0.0135768	0.317757	0.053	0.043	1		Shank3	0	-0.510586
G6pc3	0.31143	0.31547	0.017	0.01	1		Hagh	0.00405726	0.317652	0.045	0.034	1		Abcc9	0	-0.511257
Kirrel3	0.267786	0.315397	0.037	0.031	1		Taf6	0.00579177	0.317503	0.053	0.042	1		Adhfe1	0	-0.514284
C4b	0.847679	0.315003	0.014	0.009	1		Npas2	0.00505036	0.31703	0.119	0.103	1		Plxnd1	0	-0.527509
Bmf	0.745307	0.314589	0.012	0.008	1		Smad7	1.13734e-07	0.316968	0.388	0.342	0.00224818		Ank3	0	-0.538069
Gse1	9.98239e-12	0.314312	0.2	0.128	1.97322e-07		Snn	0.385921	0.31696	0.012	0.01	1		Akap6	0	-0.551275
Nt5dc3	3.69474e-06	0.314185	0.049	0.033	0.0730338		Nipsnap3b	0.0105349	0.316946	0.035	0.027	1		Rasgrp3	0	-0.554163
Plekhg3	5.93449e-12	0.314139	0.211	0.148	1.17307e-07		Tpd52l2	6.9834e-05	0.316728	0.124	0.1	1		Dach1	0	-0.564461
Zfp97	0.41789	0.313951	0.012	0.009	1		Gorasp1	0.095937	0.316499	0.011	0.008	1		Tnfaip8	0	-0.566962
Atp6v0a2	5.00744e-05	0.313738	0.094	0.057	0.98982		Morf4l2	2.16936e-09	0.31643	0.23	0.183	4.28817e-05		Rcan2	0	-0.569847
Lmx1b	0.0672076	0.313659	0.014	0.01	1		Gtf2h4	0.26751	0.316123	0.016	0.014	1		Cacna1c	0	-0.571149
Tada1	0.15733	0.313622	0.033	0.025	1		Ulbp1	0.109406	0.316074	0.013	0.009	1		Pde4dip	0	-0.5792
Ppp1r35	0.498887	0.313222	0.015	0.01	1		Tiparp	1.02875e-06	0.316046	0.202	0.166	0.0203352		Plxna4	0	-0.583076
Nkap	0.0127988	0.313197	0.047	0.034	1		Ttc39c	0.0386832	0.316019	0.038	0.03	1		Alpk3	0	-0.586149
Vegfb	0.171339	0.312614	0.024	0.018	1		Galk1	0.00333699	0.315838	0.034	0.025	1		Rai2	0	-0.5946
Pstk	0.36144	0.312438	0.049	0.034	1		Bik	0.320218	0.315743	0.011	0.009	1		Arap2	0	-0.602799
Fam234a	0.000204208	0.31241	0.103	0.073	1		Klhdc2	0.000108038	0.315691	0.128	0.105	1		Myh7b	0	-0.603006
Tlr4	9.75395e-07	0.312017	0.092	0.065	0.0192806		Camk2n1	2.29912e-05	0.315517	0.14	0.114	0.454466		Shroom3	0	-0.608934
Ptgis	7.29454e-21	0.311935	0.49	0.363	1.44191e-16		Pou5f2	0.0338478	0.315268	0.028	0.021	1		Ppip5k2	0	-0.609923
Trim65	0.0389064	0.311849	0.035	0.026	1		Tsta3	0.0623999	0.315148	0.036	0.03	1		Art3	0	-0.610511
Spred3	0.00490859	0.311443	0.037	0.027	1		Htr1f	0.000170848	0.31502	0.066	0.049	1		Dmd	0	-0.610638
Arrdc1	0.0499248	0.311265	0.015	0.01	1		Gch1	0.756801	0.314778	0.026	0.025	1		Pip5k1b	0	-0.621632
Frmd8	5.41398e-06	0.311094	0.071	0.046	0.107018		Srgap1	5.17233e-10	0.314763	0.199	0.153	1.02241e-05		Prr16	0	-0.62759
Ethe1	0.0466494	0.310994	0.025	0.018	1		Rpl13a	4.42359e-05	0.314429	0.092	0.07	0.87441		Acacb	0	-0.638082
Rassf8	1.76919e-11	0.310917	0.226	0.151	3.49716e-07		Nacc1	0.0130317	0.31362	0.054	0.044	1		Esrrg	0	-0.645453
Tcof1	0.0981118	0.310871	0.024	0.016	1		Ifit3	0.341195	0.313619	0.014	0.012	1		Cd36	0	-0.649114
Ranbp3	3.42839e-05	0.310795	0.079	0.051	0.67769		Hint1	0.00118924	0.313614	0.061	0.047	1		Pln	0	-0.649942
Zfp248	0.000454511	0.310637	0.054	0.037	1		Synj2bp	0.00886692	0.313488	0.069	0.057	1		Cmss1	0	-0.650133
Zfp563	0.0195807	0.310587	0.039	0.027	1		Gprc5b	0.0140089	0.313392	0.074	0.063	1		Gpx3	0	-0.650819
Gabbr1	6.79598e-07	0.310288	0.143	0.104	0.0134336		Pcdh11x	0.197101	0.313212	0.013	0.01	1		Kcnd2	0	-0.657779
Mroh1	0.0679799	0.310275	0.035	0.021	1		Traf5	4.98038e-08	0.313095	0.187	0.147	0.000984471		Me3	0	-0.662941
Ranbp1	0.0769464	0.309924	0.029	0.021	1		Nuak2	0.0059087	0.312654	0.048	0.037	1		Slc4a3	0	-0.664106
Map2	7.05517e-13	0.309624	0.248	0.178	1.39459e-08		Kirrel3	0.00096178	0.312618	0.08	0.063	1		Trdn	0	-0.664588
Mob1b	0.00482721	0.309253	0.085	0.057	1		Trp53	2.80108e-05	0.312556	0.101	0.078	0.553689		Actn2	0	-0.678894
Lrrk1	1.17101e-22	0.308899	0.594	0.458	2.31474e-18		Oasl2	0.0216511	0.312512	0.105	0.093	1		Lrrc32	0	-0.686549
Jmjd6	3.84335e-05	0.308562	0.078	0.054	0.759716		Mrps11	0.293011	0.312358	0.014	0.012	1		Art1	0	-0.693499
Clcn2	0.00227915	0.308435	0.028	0.016	1		Hsp90ab1	1.30117e-06	0.312146	0.176	0.142	0.0257203		Hdac9	0	-0.698569
Axl	3.88851e-21	0.308374	0.547	0.419	7.68642e-17		Gldc	0.286472	0.312082	0.014	0.011	1		Dmpk	0	-0.714928
Epb41l5	0.00183836	0.308249	0.066	0.049	1		Ccdc106	0.03427	0.311486	0.024	0.018	1		Ano4	0	-0.717517
Mtmr12	3.07631e-05	0.30816	0.112	0.076	0.608094		Trappc13	0.0106932	0.311376	0.079	0.067	1		Myh6	0	-0.731108
Plscr3	0.00127779	0.308154	0.042	0.026	1		Mis12	0.142589	0.311194	0.019	0.015	1		St8sia4	0	-0.737922
Mphosph9	0.00275123	0.308028	0.062	0.041	1		Taok2	0.000208468	0.311051	0.144	0.12	1		Sorbs2	0	-0.744669
Txlna	7.92327e-08	0.307941	0.108	0.068	0.00156619		Sik1	1.26218e-14	0.310906	0.416	0.346	2.49496e-10		Atp8a1	0	-0.753218
Prmt2	0.00227465	0.307815	0.067	0.044	1		Gpsm3	0.00905349	0.3105	0.02	0.014	1		Mctp1	0	-0.754545
Luzp1	1.69825e-13	0.307697	0.314	0.225	3.35694e-09		Gng11	0.000352797	0.31034	0.102	0.082	1		Tnnc1	0	-0.756798
Blvra	0.194158	0.307586	0.034	0.024	1		Orc2	7.21707e-05	0.310333	0.113	0.09	1		Dpf3	0	-0.761463
Zfp810	0.00693793	0.307355	0.039	0.025	1		Irgm2	0.0150837	0.309714	0.046	0.037	1		Plscr2	0	-0.765031
Nutf2	0.00198923	0.307226	0.044	0.028	1		Fam162a	0.000328972	0.309595	0.113	0.092	1		Fhl2	0	-0.771086
Tor1aip2	1.49552e-08	0.307053	0.153	0.103	0.00029562		Snrpc	0.0766305	0.309508	0.037	0.031	1		Rbm24	0	-0.783718
Tvp23a	0.00024355	0.307041	0.034	0.021	1		Golph3	7.90128e-09	0.309369	0.259	0.212	0.000156185		Sox6	0	-0.787923
Slc9a6	0.0200632	0.307029	0.057	0.044	1		Ulk4	0.0544315	0.308935	0.039	0.032	1		Rarb	0	-0.788857
Slc17a9	0.0119519	0.306619	0.02	0.011	1		Plod3	0.0118792	0.308753	0.043	0.034	1		Mybpc3	0	-0.802519
Uhmk1	0.000129893	0.30644	0.071	0.046	1		Zfp446	0.183666	0.308704	0.023	0.02	1		Cacnb2	0	-0.804492
Patl1	0.000117574	0.30642	0.082	0.058	1		Mars	0.141218	0.308617	0.027	0.022	1		Mypn	0	-0.8054
Mri1	6.41002e-06	0.306392	0.099	0.06	0.126707		Rps5	0.000104105	0.308593	0.068	0.05	1		Myoz2	0	-0.807747
D8Ertd738e	0.771196	0.306355	0.031	0.024	1		D11Wsu47e	0.075065	0.308421	0.023	0.018	1		Ccdc141	0	-0.814565
Kdm2b	0.00261085	0.306283	0.1	0.066	1		Zc3h8	0.00131772	0.308364	0.035	0.025	1		Ldb3	0	-0.816309
Bach2	2.9514e-13	0.306151	0.306	0.225	5.83404e-09		Mrps25	0.00581817	0.308239	0.053	0.042	1		Kbtbd12	0	-0.816814
Adss	0.00139685	0.305592	0.103	0.072	1		Adam9	3.06683e-08	0.308226	0.253	0.209	0.00060622		Wnk2	0	-0.841067
Sesn2	0.210813	0.30539	0.013	0.01	1		Atp5g2	0.0118109	0.308057	0.068	0.057	1		Kcnq1	0	-0.841345
Arhgap22	3.65516e-09	0.305077	0.14	0.098	7.22515e-05		Guk1	0.0188591	0.308043	0.031	0.024	1		Rbm20	0	-0.867535
Klf6	3.4956e-07	0.30449	0.137	0.105	0.00690975		Caml	0.00215769	0.307836	0.091	0.075	1		Coro6	0	-0.874156
Mapre1	4.92138e-06	0.30331	0.109	0.072	0.0972808		Arf5	0.00111555	0.307261	0.083	0.066	1		Ppp1r14c	0	-0.878627
Stxbp6	1.48905e-17	0.30303	0.395	0.29	2.94341e-13		Ccdc47	6.00342e-05	0.307259	0.101	0.079	1		Tnnt2	0	-0.884294
Stradb	0.00328558	0.302866	0.035	0.024	1		Gid8	0.0896282	0.307124	0.031	0.025	1		Trim55	0	-0.893593
Ralgps1	3.29449e-07	0.302821	0.129	0.081	0.00651222		Phf11d	0.0607844	0.307108	0.067	0.059	1		Nebl	0	-0.900053
Cuta	0.0172917	0.30281	0.032	0.021	1		Lrrc75a	0.00325449	0.30709	0.053	0.041	1		Pkp2	0	-0.906131
Dcbld2	4.21109e-16	0.302764	0.38	0.279	8.32406e-12		Pigp	0.00255213	0.306844	0.068	0.054	1		Nt5e	0	-0.909304
Ttc7b	1.0015e-06	0.302615	0.224	0.148	0.0197966		Zfp651	0.0229569	0.306835	0.048	0.039	1		Rgs5	0	-0.913622
Ndufa2	0.500285	0.302304	0.031	0.028	1		Lrrc14b	0.159525	0.306783	0.01	0.007	1		Agtr1a	0	-0.918152
Glrx2	0.0369489	0.302065	0.049	0.033	1		Mthfr	1.7245e-05	0.30673	0.116	0.091	0.340882		Hs3st5	0	-0.920442
Gxylt2	6.41242e-22	0.301898	0.454	0.331	1.26754e-17		Tirap	0.0848368	0.306723	0.038	0.032	1		Cdh2	0	-0.93073
Ypel1	0.00617031	0.301855	0.029	0.019	1		Tipin	0.000350548	0.306705	0.084	0.066	1		Lmo7	0	-0.935598
Psmg1	0.0786585	0.301836	0.018	0.012	1		Ss18l1	0.239456	0.306676	0.02	0.017	1		Strip2	0	-0.940189
Cerk	2.30488e-05	0.30182	0.146	0.107	0.455606		Erf	0.0188141	0.30663	0.055	0.045	1		Fgf14	0	-0.94756
Sh3bp1	0.000519703	0.301628	0.027	0.014	1		Xbp1	2.83764e-08	0.306536	0.188	0.147	0.000560916		Scn5a	0	-0.966471
Lrrc8b	0.0134537	0.301479	0.042	0.03	1		Smim10l1	1.37073e-05	0.306421	0.084	0.062	0.270953		Palld	0	-0.967512
Trim8	0.00850213	0.301417	0.052	0.033	1		Aldh3a2	8.36156e-05	0.306378	0.103	0.082	1		Corin	0	-0.971777
Ahdc1	7.83286e-14	0.301269	0.325	0.224	1.54832e-09		Eif2s2	1.89857e-06	0.30627	0.192	0.157	0.0375291		Gramd1b	0	-0.977463
Vps33b	0.001098	0.301141	0.054	0.036	1		Pop1	0.0152536	0.306073	0.041	0.033	1		Sdc4	0	-0.985142
Ssbp4	0.0146235	0.301066	0.037	0.023	1		Id1	0.0029712	0.306068	0.118	0.1	1		Lama5	0	-0.995183
Mrpl22	0.190193	0.30088	0.016	0.012	1		Lrp3	0.245229	0.305993	0.018	0.016	1		Kcnd3	0	-1.02128
Mcmbp	2.45789e-11	0.300759	0.197	0.132	4.85852e-07		Rpl14	0.000213388	0.305978	0.055	0.04	1		Ryr2	0	-1.02958
Pon3	4.66668e-06	0.30063	0.107	0.074	0.0922463		Rangap1	0.354514	0.305806	0.034	0.031	1		Obscn	0	-1.03497
Ckb	0.018166	0.300457	0.065	0.045	1		Olfml2b	0.108149	0.30574	0.023	0.019	1		Tmem117	0	-1.03862
Psap	0.901177	0.300391	0.052	0.043	1		Gpr89	0.138077	0.305627	0.024	0.02	1		Acss1	0	-1.04756
Trappc4	0.00969587	0.300292	0.037	0.027	1		Hdx	0.0298535	0.305199	0.033	0.026	1		Mlip	0	-1.04935
Arhgap10	1.11541e-21	0.299929	0.509	0.38	2.20483e-17		Slc37a4	0.404369	0.304599	0.013	0.011	1		Kcnn2	0	-1.06801
Acat1	0.024438	0.299881	0.123	0.089	1		Hykk	0.00442108	0.304388	0.047	0.036	1		Pde4d	0	-1.08067
Stoml2	0.0171189	0.299475	0.034	0.022	1		Psmc4	0.0844895	0.304356	0.041	0.035	1		Ppp1r3a	0	-1.08549
Ammecr1	9.33341e-08	0.29936	0.139	0.098	0.00184494		Impdh2	0.0134343	0.304235	0.027	0.02	1		Mylk3	0	-1.10623
Hspa12b	7.66234e-06	0.299242	0.079	0.048	0.151461		Uqcrh	2.27942e-05	0.304115	0.131	0.106	0.450573		Slc27a1	0	-1.1112
Zfp820	0.0892544	0.299057	0.019	0.013	1		Arid3a	0.178154	0.304009	0.021	0.017	1		Lrrc3b	0	-1.14035
Map4k2	0.132306	0.299047	0.021	0.015	1		Map1a	0.0217157	0.303826	0.043	0.035	1		Slc25a13	0	-1.165
Vps18	0.0712802	0.298755	0.03	0.02	1		Asb1	0.18625	0.303782	0.022	0.018	1		Nav2	0	-1.17924
Msrb3	1.44185e-14	0.298266	0.344	0.242	2.85011e-10		Twistnb	0.00979373	0.303747	0.041	0.032	1		Chrm2	0	-1.19222
Kcnip3	3.37975e-08	0.298196	0.154	0.108	0.000668076		Sema3a	0.512417	0.303708	0.012	0.011	1		Grm1	0	-1.19891
Rsrp1	2.74354e-17	0.298177	0.435	0.326	5.42316e-13		Rfxank	0.0743883	0.303653	0.025	0.02	1		Txlnb	0	-1.21422
Tango2	3.74648e-07	0.29817	0.125	0.082	0.00740566		Sart3	0.00315968	0.303545	0.06	0.047	1		Cyfip2	0	-1.23774
Etnk2	0.0427043	0.298124	0.025	0.017	1		Rev1	3.05329e-12	0.303261	0.296	0.237	6.03545e-08		Mtus2	0	-1.2569
Calm3	0.0529812	0.29784	0.04	0.025	1		Ddx59	0.104207	0.303208	0.021	0.017	1		Myocd	0	-1.281
Pip5k1c	6.34601e-07	0.297692	0.076	0.043	0.0125442		Hhipl1	0.0816632	0.303122	0.076	0.068	1		Kcnj3	0	-1.31919
Heatr5b	6.2606e-07	0.297492	0.09	0.055	0.0123753		Cep152	0.00119335	0.303072	0.053	0.04	1		Fhod3	0	-1.39564
Wdr45	0.0201367	0.297178	0.023	0.015	1		Pnp	1.40078e-06	0.303037	0.157	0.125	0.0276891		Myom2	0	-1.43225
Exog	0.0398997	0.297079	0.021	0.013	1		Dusp11	1.13369e-08	0.302917	0.233	0.188	0.000224097		Mapk10	0	-1.45958
Il10rb	0.000200511	0.297068	0.043	0.027	1		Zfp846	0.00615181	0.302914	0.045	0.035	1		Tnni3k	0	-1.47071
Dgkh	1.55146e-11	0.296989	0.189	0.136	3.06677e-07		D1Ertd622e	0.0738856	0.302795	0.023	0.018	1		Mlf1	0	-1.50254
Atg2a	6.83104e-06	0.296728	0.044	0.028	0.135029		Atg9a	0.0053525	0.302787	0.053	0.042	1		Rnf207	0	-1.56656
Sertad1	0.0455214	0.29595	0.016	0.009	1		Jmjd6	2.03448e-06	0.302773	0.089	0.064	0.0402155		Scn3a	0	-1.57593
Lyrm4	0.754436	0.295844	0.033	0.023	1		Scml4	0.00271312	0.301794	0.069	0.055	1		Fgf13	0	-1.5963
Ncs1	0.00294058	0.295574	0.052	0.034	1		Rbbp7	1.10995e-05	0.301539	0.127	0.1	0.219403		Carns1	0	-1.6029
Slc1a5	3.03017e-22	0.295495	0.609	0.471	5.98973e-18		Trappc2	0.00536938	0.301502	0.026	0.018	1		Ybx2	0	-1.61983
Pms2	0.00972132	0.295312	0.04	0.028	1		Gnptg	0.160601	0.301473	0.035	0.03	1		Mylk4	0	-1.65586
Dpp4	2.15382e-07	0.295289	0.097	0.065	0.00425746		Cabp1	0.00257309	0.301378	0.069	0.055	1		Plxnb1	0	-1.75083
Dpm1	8.22103e-08	0.295199	0.105	0.067	0.00162505		P3h3	3.23109e-05	0.301213	0.132	0.106	0.638689		Tecrl	0	-1.75251
Pfdn5	0.932687	0.295143	0.027	0.021	1		Traf6	0.00141562	0.301111	0.086	0.07	1		Cyp26b1	0	-2.42912
Gvin1	0.0704365	0.294619	0.016	0.011	1		Tmem150a	0.00418105	0.300115	0.057	0.045	1
Dolk	0.6167	0.29431	0.014	0.009	1		B9d1	0.247461	0.300028	0.013	0.011	1
Ubp1	7.47508e-13	0.294308	0.228	0.156	1.4776e-08		Wdr60	6.76302e-06	0.299957	0.154	0.124	0.133685
Agpat1	0.0870482	0.294068	0.02	0.015	1		Tsr1	0.0431908	0.299918	0.03	0.024	1
Mrc2	1.25669e-21	0.293646	0.569	0.437	2.48409e-17		Zfyve19	0.0168591	0.299831	0.037	0.029	1
Penk	0.0751576	0.293552	0.022	0.016	1		Fam161a	0.0610798	0.299576	0.041	0.035	1
Itpr3	0.00347979	0.293411	0.047	0.034	1		Cox8b	1.88679e-05	0.29953	0.063	0.045	0.372962
Dlg2	3.24234e-19	0.293272	0.356	0.251	6.40914e-15		Nmd3	0.00237429	0.299273	0.081	0.066	1
Ptpn11	2.21589e-10	0.293126	0.117	0.084	4.38015e-06		Nr6a1	1.27951e-12	0.29919	0.339	0.276	2.52921e-08
Ptgr1	0.0538531	0.292946	0.015	0.009	1		Ppp1r11	0.00344536	0.299096	0.048	0.036	1
Alg12	0.133833	0.292784	0.026	0.014	1		Pgam1	0.310159	0.299075	0.025	0.022	1
D1Ertd622e	0.102003	0.292215	0.019	0.012	1		Mkks	0.00190114	0.298957	0.058	0.045	1
Tspan5	1.09407e-11	0.292135	0.262	0.191	2.16264e-07		Phf13	0.18513	0.298949	0.012	0.01	1
Smcr8	0.274901	0.292024	0.021	0.014	1		Capn7	3.73241e-07	0.298942	0.166	0.131	0.00737786
Arel1	8.11983e-06	0.291968	0.102	0.068	0.160505		Prr13	0.070886	0.298772	0.043	0.036	1
R3hdm4	0.00164973	0.291787	0.064	0.042	1		Topbp1	0.000199703	0.298676	0.094	0.075	1
Acot11	0.0109409	0.291715	0.035	0.02	1		Sec61a1	2.86876e-05	0.298338	0.147	0.12	0.567068
Ublcp1	1.02758e-05	0.291706	0.099	0.065	0.203121		Anxa2	7.75264e-10	0.298163	0.257	0.208	1.53246e-05
Man1b1	3.59697e-06	0.291687	0.095	0.067	0.0711012		Stx1a	0.000485132	0.298144	0.1	0.081	1
Mtmr11	5.05351e-06	0.291645	0.081	0.056	0.0998927		Layn	0.000802993	0.298137	0.097	0.079	1
Myl12a	0.00618398	0.2916	0.053	0.044	1		Lrrcc1	0.000612951	0.297973	0.091	0.073	1
Pfdn4	0.0180934	0.291573	0.017	0.013	1		Mob1a	0.0128845	0.297954	0.071	0.059	1
Ehmt2	7.93347e-09	0.291464	0.142	0.096	0.000156821		Zfp942	2.46918e-06	0.297417	0.117	0.09	0.0488083
Dhrs7b	0.000191962	0.291454	0.052	0.032	1		Gskip	0.000258549	0.297376	0.067	0.05	1
Mylip	1.30041e-06	0.291407	0.068	0.042	0.0257052		Cript	0.000612456	0.297307	0.066	0.051	1
Uvssa	2.6685e-06	0.291397	0.109	0.073	0.0527482		Pla1a	1.00652e-06	0.297271	0.303	0.264	0.019896
Cry2	2.8979e-05	0.291293	0.093	0.06	0.572828		Snf8	0.000780263	0.297034	0.086	0.069	1
Reep3	9.00652e-07	0.291196	0.215	0.154	0.0178032		Ap1s1	0.0506319	0.29699	0.053	0.046	1
Zfp410	4.94041e-07	0.291104	0.101	0.072	0.00976571		Nit1	0.00620382	0.296979	0.064	0.052	1
Jag1	5.70632e-08	0.290992	0.164	0.123	0.00112797		Adm	0.0575314	0.296973	0.071	0.062	1
Dcbld1	0.0658892	0.290943	0.021	0.015	1		Exosc7	0.00314591	0.296903	0.076	0.062	1
Kat5	0.00649571	0.290654	0.026	0.015	1		Ints5	0.289658	0.296785	0.01	0.008	1
Sin3b	4.51136e-05	0.29045	0.072	0.051	0.891761		S100a10	0.000562441	0.296603	0.105	0.085	1
Poldip2	0.0535732	0.290341	0.052	0.033	1		Mynn	0.00488077	0.2964	0.068	0.056	1
Son	1.64613e-27	0.290015	0.729	0.593	3.25391e-23		Rpl37	6.3337e-05	0.296294	0.087	0.067	1
Map3k12	6.79763e-05	0.289951	0.09	0.061	1		Slc39a1	0.194539	0.296058	0.024	0.021	1
Mrpl43	0.197964	0.289946	0.024	0.016	1		Grasp	0.000200694	0.296019	0.202	0.174	1
March3	6.14429e-19	0.289844	0.453	0.333	1.21454e-14		Rbmx	8.78911e-06	0.295925	0.14	0.111	0.173734
Cdc25b	0.000228403	0.289714	0.062	0.039	1		BC024978	0.0247579	0.295639	0.022	0.016	1
Ugdh	0.00112628	0.289664	0.154	0.122	1		Zfp354c	0.00161607	0.295528	0.073	0.058	1
Ngdn	0.231334	0.289582	0.031	0.023	1		Per1	2.62457e-12	0.295391	0.331	0.27	5.18798e-08
Git1	0.00764814	0.28951	0.027	0.016	1		Casp7	0.000163479	0.295343	0.08	0.061	1
Ppp6r2	5.9356e-11	0.28945	0.25	0.164	1.17329e-06		Ndufb5	0.0909869	0.295338	0.038	0.032	1
Acap3	2.35972e-10	0.289332	0.107	0.071	4.66447e-06		Gpr176	0.063163	0.295215	0.022	0.017	1
Gsk3a	0.00573188	0.289052	0.053	0.036	1		Smc6	8.97855e-11	0.295214	0.358	0.301	1.77479e-06
Prex2	1.78812e-22	0.288986	0.785	0.67	3.53457e-18		Pex19	0.000159815	0.294989	0.09	0.07	1
Efcab5	0.0155257	0.288742	0.071	0.055	1		Shisa5	0.0054059	0.294972	0.088	0.074	1
Ephb2	0.00103247	0.288636	0.024	0.013	1		Npr3	0.186204	0.294645	0.038	0.034	1
Glyr1	6.99534e-14	0.288529	0.292	0.204	1.38277e-09		Tmem136	0.054976	0.294431	0.036	0.029	1
Stk36	0.0717756	0.288502	0.011	0.006	1		Mdfi	0.0342176	0.294392	0.036	0.029	1
Ranbp17	2.50461e-07	0.288104	0.161	0.118	0.00495087		Mcoln1	0.000381527	0.294334	0.058	0.043	1
Srebf1	0.0102443	0.288095	0.053	0.035	1		Rsl1	0.153251	0.293859	0.01	0.007	1
Cisd2	0.000630852	0.288089	0.108	0.068	1		Kctd9	6.49895e-05	0.29374	0.129	0.105	1
Ncaph2	0.0341942	0.288021	0.055	0.04	1		Polg2	0.000636907	0.293735	0.051	0.038	1
Bbs12	0.0618649	0.287931	0.026	0.016	1		Pogk	0.0335466	0.293734	0.061	0.052	1
Wars	0.00677201	0.287924	0.044	0.031	1		Chtf8	0.00762568	0.293678	0.052	0.041	1
Nsun4	0.0920631	0.287424	0.054	0.032	1		Nub1	0.000130099	0.29348	0.129	0.106	1
Mlf2	0.0482898	0.287334	0.038	0.027	1		Fam149a	0.240424	0.2933	0.015	0.012	1
Pxdc1	0.000466429	0.287026	0.088	0.066	1		Ahctf1	6.00633e-11	0.293284	0.299	0.243	1.18727e-06
Desi1	3.36238e-05	0.28655	0.086	0.052	0.664641		Rbm46	0.956006	0.293227	0.011	0.011	1
Bckdk	0.0432841	0.286546	0.043	0.029	1		Lactb	0.00437031	0.293155	0.03	0.021	1
Chd3	1.456e-08	0.286478	0.14	0.091	0.000287808		Scrn1	5.9053e-07	0.292878	0.162	0.129	0.011673
Iglon5	0.0752105	0.286419	0.012	0.008	1		Ppp1r3c	0.193458	0.292829	0.013	0.01	1
Cables1	8.31782e-14	0.286237	0.262	0.185	1.64418e-09		Gabarapl2	0.0291735	0.292598	0.053	0.044	1
Snrpg	0.212027	0.286063	0.026	0.02	1		Cdk11b	8.09739e-06	0.292587	0.201	0.169	0.160061
Dnajc8	1.54082e-06	0.286002	0.092	0.062	0.0304575		Atp6v1g1	0.00582015	0.292563	0.039	0.03	1
Slc26a11	2.14757e-05	0.285884	0.068	0.041	0.42451		Tbl2	0.0118535	0.292503	0.037	0.029	1
Sgsm3	0.170824	0.285848	0.026	0.019	1		Sec24c	1.41628e-07	0.292344	0.147	0.113	0.00279957
Tmed1	0.624366	0.285735	0.014	0.012	1		Tpm2	0.00532739	0.292135	0.028	0.02	1
Irf8	0.0203432	0.285698	0.041	0.025	1		Slc35e2	0.0244091	0.292052	0.063	0.054	1
Isca1	0.0738491	0.285485	0.021	0.015	1		Kif2a	9.02075e-11	0.291981	0.28	0.226	1.78313e-06
Gna11	0.00589604	0.285394	0.053	0.035	1		Acot8	0.000761367	0.291968	0.054	0.04	1
Eif3d	0.427498	0.28503	0.02	0.015	1		Rcn1	0.00427923	0.29192	0.071	0.058	1
Rbbp8	0.000839866	0.284559	0.088	0.064	1		Eif5a	0.000335409	0.291895	0.042	0.029	1
Bcl7a	4.31422e-06	0.284488	0.107	0.071	0.0852793		Zfp729a	0.07232	0.291768	0.04	0.033	1
Ccdc86	0.881798	0.284432	0.012	0.01	1		Psmb10	0.160019	0.291577	0.02	0.016	1
Il20rb	0.00929486	0.284414	0.039	0.025	1		Etfb	0.516154	0.291563	0.031	0.029	1
Fkbp8	0.0226927	0.284371	0.065	0.041	1		Pus7l	0.0950286	0.291446	0.019	0.015	1
Nr3c2	1.28762e-09	0.284306	0.292	0.214	2.54523e-05		Fasn	0.0641916	0.291379	0.015	0.011	1
Rbp1	1.27606e-07	0.28422	0.152	0.101	0.00252239		Mlf2	0.0738489	0.291365	0.05	0.043	1
Endod1	0.146995	0.283915	0.019	0.015	1		Eef1b2	9.91332e-05	0.291355	0.05	0.035	1
Pdcd4	5.38696e-11	0.283241	0.253	0.185	1.06484e-06		Chrnb1	0.00603935	0.29126	0.05	0.039	1
Lurap1l	0.00574077	0.282787	0.037	0.026	1		Sult1a1	0.00281275	0.29109	0.047	0.036	1
Gpr156	0.00640502	0.282747	0.018	0.011	1		Pomgnt1	0.00397664	0.290676	0.068	0.054	1
Uvrag	1.0752e-16	0.282647	0.463	0.35	2.12534e-12		Nop2	0.138314	0.290663	0.028	0.023	1
Mtus1	0.0145221	0.282583	0.096	0.063	1		Nkd1	0.300823	0.290391	0.014	0.012	1
Kctd6	0.0157025	0.282307	0.042	0.03	1		Nhej1	0.0141062	0.290278	0.033	0.025	1
Abca9	5.99846e-20	0.282138	0.542	0.414	1.18572e-15		Dis3	0.0235318	0.290151	0.052	0.043	1
Fem1c	0.0533707	0.28206	0.063	0.042	1		Msmo1	0.01736	0.290143	0.019	0.013	1
Eif3b	0.00357688	0.282009	0.073	0.053	1		Bola2	0.0981003	0.290043	0.013	0.01	1
Ppp2r3d	0.00738106	0.281554	0.039	0.026	1		Ndufa10	0.00437898	0.289667	0.092	0.078	1
Zfp14	0.0181808	0.281512	0.04	0.024	1		Polr2c	0.0315268	0.28963	0.034	0.027	1
Slx1b	0.0011284	0.281348	0.051	0.034	1		Prkab2	1.31627e-06	0.289621	0.14	0.109	0.0260187
Adamtsl4	2.811e-08	0.281288	0.105	0.069	0.00055565		Epm2aip1	0.00077833	0.289506	0.082	0.065	1
Slc29a1	0.00523264	0.281076	0.087	0.055	1		Pold2	0.886085	0.289356	0.012	0.012	1
Emd	0.0111171	0.281057	0.037	0.028	1		Snrnp48	1.98454e-08	0.289118	0.206	0.164	0.000392285
Prdx3	0.357406	0.281043	0.03	0.023	1		Wasl	1.28223e-12	0.289068	0.417	0.353	2.53458e-08
Exosc2	0.000614621	0.281017	0.035	0.018	1		Atp5b	5.86592e-07	0.28906	0.172	0.138	0.0115952
Gab1	1.46267e-13	0.280867	0.335	0.243	2.89126e-09		Lrrn2	0.00591532	0.289008	0.068	0.056	1
Dbndd2	0.0196066	0.280825	0.021	0.012	1		Eif2d	0.00277152	0.288852	0.064	0.051	1
Col4a6	0.00010551	0.280668	0.072	0.052	1		Col27a1	4.82213e-08	0.288852	0.258	0.215	0.000953191
Glb1	1.95792e-06	0.280641	0.118	0.08	0.0387022		Mrpl27	0.00716254	0.28879	0.035	0.027	1
Hdac7	3.33741e-12	0.280539	0.331	0.244	6.59706e-08		Sri	9.95578e-06	0.28875	0.129	0.102	0.196796
Triap1	0.505236	0.280443	0.01	0.009	1		Kifc2	0.216096	0.288527	0.026	0.022	1
Tti1	0.00640174	0.280439	0.056	0.038	1		Ppp1r35	0.45492	0.288371	0.015	0.013	1
Mrps22	0.282054	0.280251	0.022	0.015	1		Armcx3	0.00215502	0.288317	0.087	0.071	1
Srrd	0.226737	0.279791	0.011	0.007	1		Tpr	8.79041e-09	0.28812	0.345	0.298	0.00017376
Mrps26	0.399331	0.279655	0.035	0.023	1		Mettl4	0.193393	0.28807	0.034	0.029	1
Nprl3	4.34224e-05	0.279338	0.102	0.068	0.85833		Dbnl	0.142179	0.288002	0.059	0.053	1
Ehbp1l1	0.0105291	0.279336	0.081	0.057	1		Mmp3	0.862522	0.287794	0.016	0.016	1
Map3k1	0.000503565	0.279308	0.096	0.067	1		Meox1	0.00671588	0.287696	0.05	0.039	1
Ap1g2	0.0800389	0.279216	0.013	0.007	1		Dvl3	0.000172378	0.287691	0.061	0.045	1
Grina	0.0365824	0.278984	0.079	0.053	1		Tmem234	5.54037e-08	0.287394	0.178	0.14	0.00109516
Pdgfd	2.56481e-08	0.278934	0.099	0.069	0.000506986		Mrpl39	0.0761759	0.287319	0.03	0.025	1
Synpo	5.36004e-11	0.278545	0.124	0.081	1.05952e-06		Hist3h2a	0.223004	0.287248	0.016	0.013	1
Fra10ac1	0.00329618	0.278528	0.07	0.046	1		Cnot3	0.0001823	0.287232	0.144	0.12	1
Ist1	2.07833e-05	0.278336	0.1	0.065	0.410824		Bet1	0.00100989	0.287097	0.078	0.062	1
Plod2	3.06759e-15	0.278263	0.307	0.212	6.0637e-11		Nol12	0.00959068	0.287073	0.031	0.023	1
Aarsd1	0.0328333	0.278067	0.032	0.022	1		Sdcbp	4.42774e-08	0.286997	0.208	0.166	0.000875232
Mdm2	4.40125e-07	0.277882	0.132	0.086	0.00869995		Atp5a1	2.49562e-10	0.286602	0.213	0.164	4.93309e-06
Cacybp	0.0655524	0.27733	0.021	0.015	1		Elp6	0.00532505	0.286449	0.02	0.013	1
Satb2	0.00510264	0.277071	0.047	0.032	1		Fndc1	4.48839e-16	0.286399	0.377	0.301	8.8722e-12
Zbtb7a	3.36024e-07	0.27697	0.122	0.085	0.00664218		Cap1	3.59432e-08	0.286335	0.199	0.158	0.000710489
Rpl23	0.00265893	0.276562	0.056	0.035	1		Igsf10	0.000400678	0.285956	0.043	0.03	1
Sspn	0.00264989	0.276526	0.085	0.057	1		Prelid1	0.0360573	0.285777	0.023	0.018	1
Rhno1	0.000705001	0.276491	0.035	0.022	1		Sec61b	0.405624	0.285601	0.017	0.015	1
Guk1	0.283288	0.276481	0.027	0.02	1		Lsm11	0.0396956	0.285561	0.017	0.012	1
Ccnh	1.82742e-06	0.276458	0.119	0.086	0.0361226		Dnase2a	0.0620481	0.28532	0.025	0.02	1
Gfer	0.111358	0.276423	0.022	0.013	1		Inpp5e	0.112602	0.285272	0.029	0.024	1
Lzts2	0.000100582	0.276031	0.097	0.06	1		Snap47	0.0199765	0.285228	0.051	0.042	1
Pkd1	8.62432e-20	0.276023	0.585	0.456	1.70477e-15		Ube2s	0.00017268	0.285219	0.094	0.074	1
Celf1	6.45333e-18	0.275919	0.449	0.328	1.27563e-13		Leprotl1	0.0150667	0.285002	0.034	0.026	1
H2-T22	0.000168235	0.275897	0.069	0.046	1		Eri2	0.00404435	0.28482	0.062	0.049	1
Strip1	0.0748531	0.275865	0.067	0.052	1		Mrfap1	0.0100123	0.284707	0.035	0.026	1
Trim16	0.000257532	0.275816	0.049	0.032	1		Prep	0.00516215	0.284334	0.076	0.062	1
Mgrn1	4.07527e-06	0.275734	0.123	0.082	0.0805558		Dhx8	0.00193812	0.284333	0.098	0.081	1
Haus2	0.0650802	0.275616	0.024	0.017	1		Ddah1	0.39381	0.28409	0.01	0.009	1
Inpp5b	0.00555126	0.275589	0.107	0.075	1		Myl6	4.76321e-12	0.284082	0.319	0.257	9.41544e-08
Prr33	0.609993	0.275499	0.023	0.015	1		Strip1	0.000210897	0.283906	0.08	0.062	1
Sec11a	2.39856e-08	0.275421	0.161	0.116	0.000474123		Zfp131	2.33115e-05	0.283871	0.152	0.124	0.460798
Yif1b	0.936074	0.275338	0.011	0.008	1		Fabp3	0.000126833	0.283425	0.129	0.105	1
Cyp2u1	0.457982	0.275275	0.015	0.01	1		Ctnnal1	0.0101468	0.283344	0.065	0.054	1
Nhsl2	8.53224e-05	0.274876	0.038	0.023	1		Plekhh2	1.84066e-13	0.28326	0.482	0.411	3.63844e-09
Eif3f	0.145697	0.274706	0.028	0.017	1		Dnajc19	4.07951e-07	0.283218	0.147	0.114	0.00806396
H2-T24	0.557855	0.274596	0.016	0.011	1		Slc11a2	0.0672825	0.283185	0.047	0.04	1
Cd151	0.236639	0.274521	0.033	0.021	1		Tatdn2	0.11291	0.28268	0.03	0.025	1
M6pr	0.0781162	0.274161	0.037	0.028	1		Taf11	0.0430001	0.282639	0.036	0.029	1
Dcaf15	0.24826	0.274079	0.013	0.009	1		Tmem126b	0.0349085	0.2826	0.021	0.015	1
Galnt15	0.00028058	0.273963	0.067	0.042	1		D8Ertd738e	0.00191826	0.28251	0.049	0.037	1
Heyl	3.95492e-13	0.273945	0.258	0.184	7.81768e-09		Mapkapk3	0.00547969	0.28234	0.067	0.054	1
Ank2	9.25789e-26	0.273704	0.809	0.688	1.83001e-21		Pprc1	0.000418278	0.282165	0.105	0.085	1
Med12	1.64466e-05	0.273692	0.093	0.062	0.325099		Mrps12	0.289382	0.282115	0.017	0.015	1
Tmeff2	0.104511	0.273641	0.028	0.021	1		Ndufa12	0.0142752	0.282111	0.049	0.04	1
Pmm2	0.000537171	0.273521	0.098	0.068	1		Aimp1	0.0216066	0.282057	0.072	0.061	1
Arnt2	0.0906702	0.273196	0.011	0.007	1		Sema3c	5.01581e-07	0.282043	0.09	0.065	0.00991475
Slc38a4	0.195483	0.272888	0.018	0.013	1		Hist1h1e	0.0832902	0.281964	0.042	0.036	1
Plod1	2.07647e-06	0.272782	0.123	0.085	0.0410457		Ddhd2	9.0857e-07	0.281953	0.229	0.191	0.0179597
Adnp	3.96008e-11	0.272708	0.154	0.099	7.82789e-07		Ccdc84	0.00249065	0.28183	0.048	0.037	1
Ensa	0.00359349	0.272696	0.086	0.062	1		Saraf	1.73405e-05	0.281689	0.125	0.099	0.342769
Ctc1	0.0364023	0.272643	0.034	0.025	1		Megf10	0.344711	0.281524	0.025	0.022	1
Topors	0.0136083	0.272623	0.049	0.035	1		Umad1	0.29429	0.281252	0.014	0.012	1
Spcs1	0.316331	0.272605	0.015	0.01	1		Mysm1	7.7029e-10	0.281242	0.284	0.232	1.52263e-05
Tm2d2	0.0016756	0.272584	0.03	0.019	1		Babam1	0.00202219	0.281222	0.087	0.071	1
Mta2	0.0034758	0.272457	0.05	0.036	1		Meiob	0.0664676	0.281192	0.019	0.014	1
Brd2	6.89396e-05	0.272423	0.098	0.071	1		Rmdn1	1.50139e-11	0.281172	0.36	0.302	2.9678e-07
Zfp72	0.0158485	0.272354	0.026	0.016	1		Samd14	0.343202	0.281166	0.014	0.012	1
Abhd2	4.38658e-07	0.272228	0.152	0.102	0.00867095		Lamtor2	0.195297	0.280903	0.019	0.016	1
Olfml2a	0.0779232	0.272149	0.037	0.027	1		Zfp24	0.00570853	0.280815	0.067	0.054	1
Spast	7.6812e-07	0.272087	0.174	0.125	0.0151834		Msto1	0.0158111	0.280669	0.031	0.023	1
Golph3	1.51369e-07	0.272015	0.205	0.154	0.00299211		Fastkd2	0.106983	0.280644	0.033	0.028	1
Rev1	3.96522e-11	0.271943	0.259	0.183	7.83804e-07		Gnpat	5.68038e-05	0.280458	0.135	0.11	1
Mapk14	2.25326e-09	0.27185	0.268	0.189	4.45401e-05		Actl6a	0.00372345	0.280444	0.093	0.078	1
Hspa14	9.98589e-06	0.271712	0.067	0.044	0.197391		Mrpl11	0.102587	0.280388	0.014	0.011	1
[truncated: 5,052 more rows]
