# Supplementary material for: Cardiorenal heart failure with preserved ejection fraction is caused by a reversible rise of mineralocorticoid-induced fibroblast subtypes
Source: Research Square preprint supplement (doi:10.21203/rs.3.rs-7039115/v1), 2025-07-14
Supplement: Supplementary file 10 [file b580ddd3b8ff7eb61bebd765.xlsx]

## Sheet: Echo
Group	sex	number of mice (n)	LAAs (mm²)	CO (ml/min)	SV (µl)	HR (bpm)	MV-E´/A´	MV-E/E´	LVAWd (mm) SAX	LVAWs (mm) SAX	LVIDd (mm) SAX	LVIDs (mm) SAX	LVPWd (mm) SAX	LVPWs (mm) SAX	EF (%)	FS (%)
CTRL	f	5	3.54±0.07	20.57±1.01	52.6±2.73	391.45±5.75	1.86±0.05	29.74±0.31	0.58±0.01	0.98±0.03	4.4±0.12	2.49±0.2	0.58±0.02	0.97±0.04	74.6±2.36	43.36±1.99
	m	5	3.84±0.14	20.56±1.04	50.39±5.26	415.98±20.39	1.88±0.05	30.05±0.88	0.63±0.01	0.94±0.03	4.29±0.07	2.73±0.11	0.62±0.02	0.98±0.04	69.87±2.45	39.3±2.01
ALDO	f	5	4.59±0.16	20.67±1.07	50.8±2.37	407.69±14.81	1.19±0.12	37.14±1.18	0.76±0.03	1.1±0.03	3.96±0.11	2.28±0.1	0.77±0.03	1.14±0.02	76.3±2.92	44.7±2.76
	m	5	4.61±0.16	20.49±0.77	54.97±2.06	374.98±20.76	1.03±0.09	38.16±1.29	0.78±0.02	1.1±0.04	4.15±0.09	2.47±0.13	0.79±0.01	1.19±0.01	74.7±2.29	43.28±1.99
REC 6 CTRL	f	5	3.72±0.15	20.39±1.41	50.7±3.17	403.55±22.37	2.07±0.15	29.88±0.37	0.59±0.01	0.94±0.02	4.45±0.16	2.87±0.11	0.57±0.02	0.9±0.02	64.86±2.48	35.44±1.87
	m	5	3.84±0.09	21.32±1.28	50.99±3.9	420.21±10.04	1.91±0.12	28.26±1.27	0.63±0.02	0.95±0.03	4.5±0.09	2.82±0.2	0.6±0.02	0.95±0.04	67.15±4.67	37.64±3.58
REC 4 ALDO	f	5	3.78±0.15	20.33±1.77	51.77±4.98	395.15±13.04	1.42±0.09	30.85±1.15	0.68±0.01	1.08±0.01	4.45±0.07	3±0.04	0.69±0.01	1.06±0.02	61.06±0.67	32.54±0.5
	m	5	3.94±0.05	19.71±0.95	48.24±1.74	408.96±16.29	1.4±0.11	35.31±0.61	0.69±0.02	1.01±0.03	4.54±0.03	3.16±0.06	0.7±0.02	1.04±0.03	57.96±1.54	30.47±1.02
REC 8 CTRL	f	5	3.52±0.11	19.39±1.26	50.96±2.44	379.24±6.92	1.87±0.07	29.56±0.76	0.6±0.01	0.91±0.02	4.41±0.14	2.78±0.14	0.61±0.01	0.92±0.02	68.75±1.86	37.05±1.66
	m	5	3.44±0.06	19.88±0.82	47.1±1.92	422.39±8.72	1.95±0.12	29.3±1.21	0.62±0.01	0.96±0.02	4.28±0.19	2.58±0.12	0.64±0	1.01±0.02	71.62±3.4	39.69±0.94
REC 8 ALDO	f	5	3.71±0.11	18.96±1.04	47.76±2.66	397.61±9.74	1.95±0.12	28.17±1.78	0.66±0.02	0.97±0.03	4.46±0.16	2.77±0.19	0.67±0.02	0.98±0.02	66.79±2.52	38.11±2.39
	m	5	3.9±0.1	19.73±0.79	46.33±1.38	426.53±16.5	1.84±0.08	29.48±1.98	0.68±0.02	0.98±0.02	4.68±0.08	3.1±0.16	0.7±0.02	1.03±0.02	67.53±3.75	33.9±2.37
REC 12 CTRL	f	5	3.74±0.12	19.1±1.04	49.23±2.43	387.83±8.21	1.87±0.03	29.57±0.74	0.63±0.02	0.88±0.01	4.43±0.16	2.9±0.16	0.61±0.02	0.91±0.01	67.92±1.98	34.82±1.27
	m	5	3.85±0.13	18.88±0.61	44.14±1.16	428.21±12.86	1.88±0.03	29.65±1.48	0.7±0.01	0.97±0.03	4.49±0.14	2.97±0.1	0.7±0.01	0.99±0.02	67.05±1.96	33.89±0.74
REC 12 ALDO	f	5	3.47±0.11	18.54±0.7	48.7±3.16	383.89±14.94	1.89±0.03	28.21±1.13	0.64±0.01	0.92±0.02	4.46±0.13	3±0.09	0.62±0.01	0.92±0.01	62.2±2.08	32.63±1.07
	m	5	3.63±0.07	20.18±0.73	49.42±1.45	408.81±12.79	1.94±0.08	25.99±0.51	0.72±0.01	1.01±0.02	4.51±0.06	2.91±0.05	0.71±0.01	0.99±0.03	66.39±1.78	35.53±1.42
REC 16 CTRL	f	5	3.63±0.11	19.24±0.79	50.1±1.61	383.74±4.4	1.86±0.04	29.51±0.46	0.61±0.01	0.89±0.02	4.42±0.15	2.84±0.14	0.61±0.01	0.92±0.01	68.33±1.36	35.92±1.04
	m	5	3.65±0.06	19.38±0.6	45.62±1.47	425.03±5.32	1.9±0.05	29.44±1.19	0.66±0	0.97±0.02	4.38±0.12	2.77±0.07	0.67±0	1±0.01	69.33±1.77	36.67±0.64
REC 16 ALDO	f	5	3.59±0.07	18.75±0.76	48.23±2.88	390.8±10.2	1.9±0.06	28±0.93	0.65±0.01	0.94±0.02	4.46±0.12	2.89±0.11	0.64±0.01	0.95±0.01	64.5±1.39	35.32±1.3
	m	5	3.76±0.04	19.95±0.61	47.87±0.57	416.65±10.17	1.87±0.05	27.53±1.01	0.7±0.01	0.99±0.02	4.6±0.04	3±0.08	0.7±0.01	1.01±0.02	66.96±1.61	34.68±1.45
REC 20 CTRL	f	5	3.7±0.1	18.82±0.55	48.69±1.49	386.61±2.36	1.9±0.06	28.96±0.6	0.62±0.01	0.94±0.01	4.37±0.16	2.86±0.15	0.6±0.02	0.93±0.01	68.25±1.63	34.62±1.11
	m	5	3.73±0.09	19.57±0.77	46.04±2.01	425.58±5.07	1.92±0.04	29.04±0.69	0.65±0.01	0.96±0.03	4.4±0.09	2.81±0.07	0.66±0	0.98±0.02	68.27±0.93	36.12±1.09
REC 20 ALDO	f	5	3.57±0.07	18.9±0.64	47.65±2.72	399.43±15.51	1.9±0.01	28±0.85	0.62±0.01	0.97±0.01	4.43±0.11	2.88±0.1	0.62±0.01	0.94±0.01	65.58±1.7	35.19±1.19
	m	5	3.69±0.02	20.63±0.52	49.63±0.94	415.77±9.2	1.86±0.02	27.26±0.87	0.68±0	1.04±0.01	4.54±0.05	2.94±0.08	0.67±0.01	1±0.02	67.04±1.33	35.13±1.62
REC 24 CTRL	f	5	3.68±0.09	18.72±0.48	48.51±1.46	386.22±3.24	1.91±0.07	28.75±0.63	0.62±0.01	0.96±0.01	4.35±0.16	2.85±0.14	0.6±0.01	0.94±0.01	68.36±1.97	34.55±1.06
	m	5	3.69±0.08	19.81±0.92	46.67±2.51	425.08±5.28	1.94±0.05	28.89±0.57	0.64±0.01	0.95±0.03	4.38±0.09	2.76±0.06	0.64±0.01	0.97±0.02	68.67±1.2	36.89±1.24
REC 24 ALDO	f	5	3.6±0.07	19.02±0.64	47.3±2.59	404.77±16	1.91±0.02	27.96±0.83	0.62±0.01	0.99±0.01	4.42±0.11	2.83±0.11	0.62±0.01	0.95±0.01	66.71±1.62	36.05±1.37
	m	5	3.71±0.04	20.78±0.49	49.7±0.97	418.2±8.57	1.84±0.03	27.74±1.09	0.67±0	1.05±0.01	4.55±0.05	2.96±0.1	0.66±0.01	1±0.02	67.26±1.66	35±1.85
