# Supplementary material for: Cardiorenal heart failure with preserved ejection fraction is caused by a reversible rise of mineralocorticoid-induced fibroblast subtypes
Source: Research Square preprint supplement (doi:10.21203/rs.3.rs-7039115/v1), 2025-07-14
Supplement: Supplementary file 11 [file f7476548bc2ed5f2b2191183.xlsx]

## Sheet: Top100 ALDO up
Term	Overlap	P-value	Adjusted P-value	Old P-value	Old Adjusted P-value	Odds Ratio	Combined Score	Genes
cAMP-mediated Signaling (GO:0019933)	3/24	0.000227436	0.0661313	0	0	29.2769	245.593	PDE1C;PDE4A;PDE7A
Regulation of Hormone Biosynthetic Process (GO:0046885)	2/5	0.000245087	0.0661313	0	0	135.354	1125.32	EGR1;STC2
Protein Depolymerization (GO:0051261)	3/26	0.000290049	0.0661313	0	0	26.7284	217.715	MICAL3;MICAL2;NCKAP5
Glutamate Receptor Signaling Pathway (GO:0007215)	3/36	0.000768177	0.105087	0	0	18.6195	133.53	GRIN3A;GRM7;GRM8
Positive Regulation of Epithelial Cell Migration (GO:0010634)	3/36	0.000768177	0.105087	0	0	18.6195	133.53	IQSEC1;RREB1;CLASP1
Actin Filament Depolymerization (GO:0030042)	2/10	0.00108504	0.123694	0	0	50.7449	346.392	MICAL3;MICAL2
G Protein-Coupled Glutamate Receptor Signaling Pathway (GO:0007216)	2/14	0.00216577	0.180136	0	0	33.8231	207.504	GRM7;GRM8
Microtubule Bundle Formation (GO:0001578)	3/53	0.0023702	0.180136	0	0	12.2784	74.2199	CLIP1;NCKAP5;CLASP1
Cytoplasmic Microtubule Organization (GO:0031122)	3/53	0.0023702	0.180136	0	0	12.2784	74.2199	CLIP1;SLK;CLASP1
Glycogen Metabolic Process (GO:0005977)	2/20	0.0044345	0.241625	0	0	22.542	122.14	PYGB;PHKG1
Ras Protein Signal Transduction (GO:0007265)	3/68	0.00480405	0.241625	0	0	9.43775	50.3815	RRAS;RAPGEF5;RGL2
Regulation of Cell-Substrate Junction Assembly (GO:0090109)	2/21	0.00488539	0.241625	0	0	21.3545	113.638	SLK;CLASP1
Negative Regulation of Extrinsic Apoptotic Signaling Pathway (GO:2001237)	3/72	0.00563543	0.241625	0	0	8.88884	46.0325	UNC5B;SERPINE1;BCL2L1
Positive Regulation of DNA Replication (GO:0045740)	2/23	0.00584762	0.241625	0	0	19.3188	99.3316	WEE1;GLI1
Negative Regulation of Extrinsic Apoptotic Signaling Pathway in Absence of Ligand (GO:2001240)	2/24	0.00635855	0.241625	0	0	18.4397	93.2672	UNC5B;BCL2L1
Negative Regulation of Extrinsic Apoptotic Signaling Pathway via Death Domain Receptors (GO:1902042)	2/24	0.00635855	0.241625	0	0	18.4397	93.2672	SERPINE1;BCL2L1
Negative Regulation of Signal Transduction in Absence of Ligand (GO:1901099)	2/24	0.00635855	0.241625	0	0	18.4397	93.2672	UNC5B;BCL2L1
Long-Chain Fatty Acid Transport (GO:0015909)	2/24	0.00635855	0.241625	0	0	18.4397	93.2672	FABP4;SLC27A6
Synaptic Transmission, Glutamatergic (GO:0035249)	2/26	0.00743899	0.250217	0	0	16.9014	82.8339	UNC13C;GRIN3A
Microtubule Nucleation (GO:0007020)	2/26	0.00743899	0.250217	0	0	16.9014	82.8339	PCNT;CLASP1
Regulation of Extrinsic Apoptotic Signaling Pathway in Absence of Ligand (GO:2001239)	2/28	0.00859621	0.250217	0	0	15.5997	74.1989	UNC5B;BCL2L1
Positive Regulation of Microtubule Polymerization or Depolymerization (GO:0031112)	2/28	0.00859621	0.250217	0	0	15.5997	74.1989	CLIP1;CLASP1
Regulation of Protein Modification by Small Protein Conjugation or Removal (GO:1903320)	2/28	0.00859621	0.250217	0	0	15.5997	74.1989	EGR1;DCUN1D2
Negative Regulation of Wound Healing (GO:0061045)	2/29	0.0092031	0.250217	0	0	15.0212	70.4224	SERPINE1;CLASP1
Positive Regulation of Endothelial Cell Migration (GO:0010595)	3/88	0.009791	0.250217	0	0	7.20982	33.3548	MAP2K3;CD40;RRAS
Positive Regulation of Microtubule Polymerization (GO:0031116)	2/30	0.00982858	0.250217	0	0	14.484	66.9516	CLIP1;CLASP1
Regulation of Extrinsic Apoptotic Signaling Pathway via Death Domain Receptors (GO:1902041)	2/32	0.0111345	0.250217	0	0	13.517	60.7955	SERPINE1;BCL2L1
Positive Regulation of Substrate Adhesion-Dependent Cell Spreading (GO:1900026)	2/35	0.013228	0.250217	0	0	12.2863	53.1436	RREB1;LIMS2
Establishment of Mitotic Spindle Localization (GO:0040001)	2/36	0.0139609	0.250217	0	0	11.9244	50.9349	GPSM1;CLASP1
Microtubule Polymerization (GO:0046785)	2/37	0.0147111	0.250217	0	0	11.5831	48.8708	PCNT;CLASP1
Regulation of G2/M Transition of Mitotic Cell Cycle (GO:0010389)	2/37	0.0147111	0.250217	0	0	11.5831	48.8708	WEE1;CCND1
Muscle Cell Differentiation (GO:0042692)	2/37	0.0147111	0.250217	0	0	11.5831	48.8708	WNT5B;TMEM204
Regulation of Intracellular Protein Transport (GO:0033157)	2/38	0.0154783	0.250217	0	0	11.2608	46.9384	PCNT;PTPN14
Fatty Acid Transport (GO:0015908)	2/39	0.0162624	0.250217	0	0	10.9559	45.1261	FABP4;SLC27A6
Establishment of Spindle Orientation (GO:0051294)	2/40	0.0170632	0.250217	0	0	10.667	43.4237	GPSM1;CLASP1
Positive Regulation of Vasculature Development (GO:1904018)	3/109	0.0173781	0.250217	0	0	5.77534	23.4048	CD40;RRAS;SERPINE1
Regulation of G1/S Transition of Mitotic Cell Cycle (GO:2000045)	3/111	0.0182313	0.250217	0	0	5.66781	22.6974	WEE1;CCND1;APPL2
Mitotic Cell Cycle Phase Transition (GO:0044772)	3/113	0.0191075	0.250217	0	0	5.5642	22.0213	WEE1;CCND1;CLASP1
Regulation of Epithelial Cell Migration (GO:0010632)	2/43	0.0195638	0.250217	0	0	9.88502	38.8884	RREB1;CLASP1
Positive Regulation of Wound Healing (GO:0090303)	2/44	0.0204295	0.250217	0	0	9.64917	37.5428	SERPINE1;RREB1
Positive Regulation of Cell Cycle G1/S Phase Transition (GO:1902808)	2/44	0.0204295	0.250217	0	0	9.64917	37.5428	CCND1;GLI1
Modulation of Chemical Synaptic Transmission (GO:0050804)	3/117	0.020929	0.250217	0	0	5.36788	20.7556	GRIN3A;GRM7;GRM8
Cytoskeleton Organization (GO:0007010)	3/117	0.020929	0.250217	0	0	5.36788	20.7556	MICAL3;MICAL2;CLASP1
Regulation of Endothelial Cell Apoptotic Process (GO:2000351)	2/47	0.0231206	0.250217	0	0	9.00454	33.9204	CD40;SERPINE1
Protein-Containing Complex Organization (GO:0043933)	3/123	0.0238342	0.250217	0	0	5.09794	19.0491	CD40;CNKSR3;TSPAN4
Endothelial Cell Morphogenesis (GO:0001886)	1/5	0.0247535	0.250217	0	0	50.2424	185.836	CNKSR3
Toxin Metabolic Process (GO:0009404)	1/5	0.0247535	0.250217	0	0	50.2424	185.836	FMO1
Regulation of Focal Adhesion Disassembly (GO:0120182)	1/5	0.0247535	0.250217	0	0	50.2424	185.836	IQSEC1
Gamma-Aminobutyric Acid Import (GO:0051939)	1/5	0.0247535	0.250217	0	0	50.2424	185.836	SLC6A6
NADPH Oxidation (GO:0070995)	1/5	0.0247535	0.250217	0	0	50.2424	185.836	FMO1
Positive Regulation of Neuroepithelial Cell Differentiation (GO:1902913)	1/5	0.0247535	0.250217	0	0	50.2424	185.836	SERPINE1
Positive Regulation of Odontoblast Differentiation (GO:1901331)	1/5	0.0247535	0.250217	0	0	50.2424	185.836	SERPINE1
Negative Regulation of Organic Acid Transport (GO:0032891)	1/5	0.0247535	0.250217	0	0	50.2424	185.836	GRM7
Glycolipid Transport (GO:0046836)	1/5	0.0247535	0.250217	0	0	50.2424	185.836	PLTP
Adiponectin-Activated Signaling Pathway (GO:0033211)	1/5	0.0247535	0.250217	0	0	50.2424	185.836	APPL2
Behavioral Fear Response (GO:0001662)	1/5	0.0247535	0.250217	0	0	50.2424	185.836	GRM7
Regulation of Tooth Mineralization (GO:0070170)	1/5	0.0247535	0.250217	0	0	50.2424	185.836	ASPN
Positive Regulation of Golgi to Plasma Membrane Protein Transport (GO:0042998)	1/5	0.0247535	0.250217	0	0	50.2424	185.836	CNST
Positive Regulation of Focal Adhesion Disassembly (GO:0120183)	1/5	0.0247535	0.250217	0	0	50.2424	185.836	IQSEC1
Actin Polymerization or Depolymerization (GO:0008154)	2/49	0.0249912	0.250217	0	0	8.6205	31.803	MICAL3;MICAL2
Positive Regulation of Angiogenesis (GO:0045766)	3/126	0.0253647	0.250217	0	0	4.97284	18.2722	CD40;RRAS;SERPINE1
Positive Regulation of Blood Vessel Endothelial Cell Migration (GO:0043536)	2/50	0.025949	0.250217	0	0	8.44048	30.8214	MAP2K3;CD40
Regulation of Substrate Adhesion-Dependent Cell Spreading (GO:1900024)	2/52	0.0279086	0.250217	0	0	8.10204	28.9958	RREB1;LIMS2
Regulation of Synaptic Transmission, Glutamatergic (GO:0051966)	2/52	0.0279086	0.250217	0	0	8.10204	28.9958	GRM7;GRM8
Regulation of Focal Adhesion Assembly (GO:0051893)	2/53	0.0289101	0.250217	0	0	7.94278	28.1457	SLK;CLASP1
Regulation of Microtubule Polymerization (GO:0031113)	2/53	0.0289101	0.250217	0	0	7.94278	28.1457	CLIP1;CLASP1
Positive Regulation of Cell Migration (GO:0030335)	5/344	0.0292525	0.250217	0	0	3.03695	10.7259	WNT5B;RRAS;GLI1;RREB1;CLASP1
Negative Regulation of Dendritic Spine Development (GO:0061000)	1/6	0.029631	0.250217	0	0	40.1919	141.433	GRIN3A
Positive Regulation of Lamellipodium Morphogenesis (GO:2000394)	1/6	0.029631	0.250217	0	0	40.1919	141.433	RREB1
Glucan Catabolic Process (GO:0009251)	1/6	0.029631	0.250217	0	0	40.1919	141.433	PYGB
Negative Regulation of Plasminogen Activation (GO:0010757)	1/6	0.029631	0.250217	0	0	40.1919	141.433	SERPINE1
Positive Regulation of Pinocytosis (GO:0048549)	1/6	0.029631	0.250217	0	0	40.1919	141.433	APPL2
Negative Regulation of Striated Muscle Tissue Development (GO:0045843)	1/6	0.029631	0.250217	0	0	40.1919	141.433	USP19
Lipoprotein Metabolic Process (GO:0042157)	1/6	0.029631	0.250217	0	0	40.1919	141.433	CTSD
Cellular Response to Hepatocyte Growth Factor Stimulus (GO:0035729)	1/6	0.029631	0.250217	0	0	40.1919	141.433	APPL2
Response to Hepatocyte Growth Factor (GO:0035728)	1/6	0.029631	0.250217	0	0	40.1919	141.433	APPL2
Regulation of MHC Class I Biosynthetic Process (GO:0045343)	1/6	0.029631	0.250217	0	0	40.1919	141.433	HSPH1
Regulation of NK T Cell Activation (GO:0051133)	1/6	0.029631	0.250217	0	0	40.1919	141.433	HSPH1
Positive Regulation of Endothelial Cell-Matrix Adhesion via Fibronectin (GO:1904906)	1/6	0.029631	0.250217	0	0	40.1919	141.433	RRAS
Regulation of Cellular Response to Hypoxia (GO:1900037)	1/6	0.029631	0.250217	0	0	40.1919	141.433	USP19
Sulfur Amino Acid Catabolic Process (GO:0000098)	1/6	0.029631	0.250217	0	0	40.1919	141.433	FMO1
Regulation of Alternative mRNA Splicing, via Spliceosome (GO:0000381)	2/55	0.0309557	0.251235	0	0	7.64228	26.5584	RBFOX1;SRSF2
Adenylate Cyclase-Inhibiting G Protein-Coupled Receptor Signaling Pathway (GO:0007193)	2/56	0.0319994	0.251235	0	0	7.50038	25.8166	GRM7;GRM8
Intracellular Signaling Cassette (GO:0141124)	5/354	0.0325134	0.251235	0	0	2.94842	10.1016	MAP2K3;PDE1C;PDE4A;RAPGEF5;PDE7A
Regulation of Blood Vessel Endothelial Cell Migration (GO:0043535)	2/57	0.0330569	0.251235	0	0	7.36364	25.1065	MAP2K3;CD40
Regulation of Cell Migration (GO:0030334)	6/479	0.033113	0.251235	0	0	2.62161	8.934	SLK;ACE;WNT5B;SERPINE1;GLI1;APPL2
Negative Regulation of Fatty Acid Oxidation (GO:0046322)	1/7	0.0344842	0.251235	0	0	33.4916	112.775	APPL2
Regulation of Endothelial Cell-Matrix Adhesion via Fibronectin (GO:1904904)	1/7	0.0344842	0.251235	0	0	33.4916	112.775	RRAS
Gamma-Aminobutyric Acid Transport (GO:0015812)	1/7	0.0344842	0.251235	0	0	33.4916	112.775	SLC6A6
Regulation of Mammary Gland Epithelial Cell Proliferation (GO:0033599)	1/7	0.0344842	0.251235	0	0	33.4916	112.775	RREB1
Lens Fiber Cell Development (GO:0070307)	1/7	0.0344842	0.251235	0	0	33.4916	112.775	WNT5B
Locomotor Rhythm (GO:0045475)	1/7	0.0344842	0.251235	0	0	33.4916	112.775	EGR1
Positive Regulation of Extracellular Matrix Disassembly (GO:0090091)	1/7	0.0344842	0.251235	0	0	33.4916	112.775	CLASP1
Microtubule Cytoskeleton Organization Involved in Mitosis (GO:1902850)	2/59	0.0352126	0.251235	0	0	7.10455	23.7743	PCNT;CLASP1
Regulation of Cell Cycle Process (GO:0010564)	3/146	0.0368873	0.251235	0	0	4.27302	14.1005	CDK18;USP19;BCL2L1
Organic Cation Transport (GO:0015695)	2/62	0.0385452	0.251235	0	0	6.7483	21.9719	SLC25A26;SLC6A6
Taurine Metabolic Process (GO:0019530)	1/8	0.0393135	0.251235	0	0	28.7056	92.8968	FMO1
Positive Regulation of Membrane Invagination (GO:1905155)	1/8	0.0393135	0.251235	0	0	28.7056	92.8968	APPL2
Nucleic Acid Transport (GO:0050657)	1/8	0.0393135	0.251235	0	0	28.7056	92.8968	RBFOX1
Regulation of Skeletal Muscle Cell Differentiation (GO:2001014)	1/8	0.0393135	0.251235	0	0	28.7056	92.8968	NR1D2
Negative Regulation of T Cell Apoptotic Process (GO:0070233)	1/8	0.0393135	0.251235	0	0	28.7056	92.8968	TSC22D3
Cellular Response to Growth Factor Stimulus (GO:0071363)	3/150	0.0394643	0.251235	0	0	4.1559	13.4334	MAP2K3;KIDINS220;APPL2
Fat Cell Differentiation (GO:0045444)	2/65	0.0419931	0.251235	0	0	6.42598	20.372	WNT5B;GDF6
Regulation of Cell-Matrix Adhesion (GO:0001952)	2/65	0.0419931	0.251235	0	0	6.42598	20.372	SLK;CLASP1
Regulation of Neurogenesis (GO:0050767)	2/66	0.0431674	0.251235	0	0	6.32526	19.8782	BHLHE41;APPL2
Synaptic Vesicle Docking (GO:0016081)	1/9	0.0441188	0.251235	0	0	25.1162	78.3842	UNC13C
Positive Regulation of Keratinocyte Migration (GO:0051549)	1/9	0.0441188	0.251235	0	0	25.1162	78.3842	IQSEC1
Regulation of Ketone Biosynthetic Process (GO:0010566)	1/9	0.0441188	0.251235	0	0	25.1162	78.3842	EGR1
Positive Regulation of Phagocytosis, Engulfment (GO:0060100)	1/9	0.0441188	0.251235	0	0	25.1162	78.3842	APPL2
Regulation of Odontoblast Differentiation (GO:1901329)	1/9	0.0441188	0.251235	0	0	25.1162	78.3842	SERPINE1
Nerve Growth Factor Signaling Pathway (GO:0038180)	1/9	0.0441188	0.251235	0	0	25.1162	78.3842	KIDINS220
Positive Regulation of Vasculogenesis (GO:2001214)	1/9	0.0441188	0.251235	0	0	25.1162	78.3842	RRAS
Lipoprotein Catabolic Process (GO:0042159)	1/9	0.0441188	0.251235	0	0	25.1162	78.3842	CTSD
Organic Acid Metabolic Process (GO:0006082)	1/9	0.0441188	0.251235	0	0	25.1162	78.3842	FMO1
Microtubule Anchoring (GO:0034453)	1/9	0.0441188	0.251235	0	0	25.1162	78.3842	CLASP1
Regulation of Vascular Wound Healing (GO:0061043)	1/9	0.0441188	0.251235	0	0	25.1162	78.3842	SERPINE1
Regulation of Wound Healing, Spreading of Epidermal Cells (GO:1903689)	1/9	0.0441188	0.251235	0	0	25.1162	78.3842	RREB1
Negative Regulation of Cell Adhesion Mediated by Integrin (GO:0033629)	1/9	0.0441188	0.251235	0	0	25.1162	78.3842	SERPINE1
Positive Regulation of Hemostasis (GO:1900048)	1/10	0.0489004	0.251235	0	0	22.3244	67.3742	SERPINE1
Ether Lipid Biosynthetic Process (GO:0008611)	1/10	0.0489004	0.251235	0	0	22.3244	67.3742	CHPT1
Exit From Mitosis (GO:0010458)	1/10	0.0489004	0.251235	0	0	22.3244	67.3742	CLASP1
Fatty Acid Beta-Oxidation Using acyl-CoA Dehydrogenase (GO:0033539)	1/10	0.0489004	0.251235	0	0	22.3244	67.3742	ACAD11
Glucan Metabolic Process (GO:0044042)	1/10	0.0489004	0.251235	0	0	22.3244	67.3742	PHKG1
Positive Regulation of Non-Canonical Wnt Signaling Pathway (GO:2000052)	1/10	0.0489004	0.251235	0	0	22.3244	67.3742	WNT5B
Regulation of Lamellipodium Morphogenesis (GO:2000392)	1/10	0.0489004	0.251235	0	0	22.3244	67.3742	RREB1
Icosanoid Secretion (GO:0032309)	1/10	0.0489004	0.251235	0	0	22.3244	67.3742	ACE
Regulation of Phagocytosis, Engulfment (GO:0060099)	1/10	0.0489004	0.251235	0	0	22.3244	67.3742	APPL2
Lens Fiber Cell Differentiation (GO:0070306)	1/10	0.0489004	0.251235	0	0	22.3244	67.3742	WNT5B
Long-Chain Fatty Acid Import Into Cell (GO:0044539)	1/10	0.0489004	0.251235	0	0	22.3244	67.3742	SLC27A6
Regulation of Golgi to Plasma Membrane Protein Transport (GO:0042996)	1/10	0.0489004	0.251235	0	0	22.3244	67.3742	CNST
Smooth Muscle Cell Differentiation (GO:0051145)	1/10	0.0489004	0.251235	0	0	22.3244	67.3742	TMEM204
Positive Regulation of Chondrocyte Differentiation (GO:0032332)	1/10	0.0489004	0.251235	0	0	22.3244	67.3742	GDF6
Negative Regulation of Cell Cycle G2/M Phase Transition (GO:1902750)	1/10	0.0489004	0.251235	0	0	22.3244	67.3742	WEE1
Positive Regulation of Protein Polymerization (GO:0032273)	2/71	0.0492185	0.251235	0	0	5.86542	17.6636	CLIP1;CLASP1
Positive Regulation of Protein Transport (GO:0051222)	2/73	0.0517203	0.251385	0	0	5.69963	16.8817	CNST;PCNT
Regulation of DNA Replication (GO:0006275)	2/73	0.0517203	0.251385	0	0	5.69963	16.8817	WEE1;GLI1
Positive Regulation of Cell-Substrate Adhesion (GO:0010811)	2/73	0.0517203	0.251385	0	0	5.69963	16.8817	RREB1;LIMS2
Positive Regulation of Gene Expression via Chromosomal CpG Island Demethylation (GO:0044029)	1/11	0.0536583	0.251385	0	0	20.0909	58.7683	EGR1
Positive Regulation of Integrin-Mediated Signaling Pathway (GO:2001046)	1/11	0.0536583	0.251385	0	0	20.0909	58.7683	LIMS2
Negative Regulation of Fibrinolysis (GO:0051918)	1/11	0.0536583	0.251385	0	0	20.0909	58.7683	SERPINE1
- Reg of Mt Outer Membrane Permeabilization Inv in Apoptotic Sgnlng Pway (GO:1901029)	1/11	0.0536583	0.251385	0	0	20.0909	58.7683	BCL2L1
Negative Regulation of Myotube Differentiation (GO:0010832)	1/11	0.0536583	0.251385	0	0	20.0909	58.7683	BHLHE41
Regulation of Keratinocyte Migration (GO:0051547)	1/11	0.0536583	0.251385	0	0	20.0909	58.7683	IQSEC1
Negative Regulation of Sprouting Angiogenesis (GO:1903671)	1/11	0.0536583	0.251385	0	0	20.0909	58.7683	EPN1
Lipid Import Into Cell (GO:0140354)	1/11	0.0536583	0.251385	0	0	20.0909	58.7683	SLC27A6
Positive Regulation of Extracellular Matrix Assembly (GO:1901203)	1/11	0.0536583	0.251385	0	0	20.0909	58.7683	CLASP1
Negative Regulation of Hemostasis (GO:1900047)	1/12	0.0583926	0.261049	0	0	18.2635	51.8788	SERPINE1
Fibrinolysis (GO:0042730)	1/12	0.0583926	0.261049	0	0	18.2635	51.8788	SERPINE1
Negative Regulation of Mitochondrial Membrane Permeability (GO:0035795)	1/12	0.0583926	0.261049	0	0	18.2635	51.8788	BCL2L1
Glial Cell-Derived Neurotrophic Factor Receptor Signaling Pathway (GO:0035860)	1/12	0.0583926	0.261049	0	0	18.2635	51.8788	GFRA2
Alanine Transport (GO:0032328)	1/12	0.0583926	0.261049	0	0	18.2635	51.8788	SLC6A6
cAMP Metabolic Process (GO:0046058)	1/12	0.0583926	0.261049	0	0	18.2635	51.8788	PDE4A
p38MAPK Cascade (GO:0038066)	1/12	0.0583926	0.261049	0	0	18.2635	51.8788	MAP2K3
Regulation of Cell Cycle G1/S Phase Transition (GO:1902806)	2/79	0.0594898	0.263903	0	0	5.25391	14.8263	GLI1;APPL2
Positive Regulation of RNA Biosynthetic Process (GO:1902680)	6/555	0.0598025	0.263903	0	0	2.24985	6.33718	MAP2K3;EGR1;NR1D2;GDF6;GLI1;RREB1
Positive Regulation of Sodium Ion Transport (GO:0010765)	1/13	0.0631034	0.264895	0	0	16.7407	46.2543	CNKSR3
Regulation of Pattern Recognition Receptor Signaling Pathway (GO:0062207)	1/13	0.0631034	0.264895	0	0	16.7407	46.2543	APPL2
Regulation of Vasculogenesis (GO:2001212)	1/13	0.0631034	0.264895	0	0	16.7407	46.2543	RRAS
Response to UV-A (GO:0070141)	1/13	0.0631034	0.264895	0	0	16.7407	46.2543	CCND1
Response to Nerve Growth Factor (GO:1990089)	1/13	0.0631034	0.264895	0	0	16.7407	46.2543	KIDINS220
Positive Regulation of Brown Fat Cell Differentiation (GO:0090336)	1/13	0.0631034	0.264895	0	0	16.7407	46.2543	RREB1
Positive Regulation of Coagulation (GO:0050820)	1/13	0.0631034	0.264895	0	0	16.7407	46.2543	SERPINE1
Negative Regulation of Protein Phosphorylation (GO:0001933)	2/83	0.0648784	0.264895	0	0	4.99345	13.6583	CNKSR3;TRIB2
Regulation of Protein Kinase Activity (GO:0045859)	2/83	0.0648784	0.264895	0	0	4.99345	13.6583	MAP2K3;TRIB2
Negative Regulation of Coagulation (GO:0050819)	1/14	0.0677909	0.264895	0	0	15.4522	41.587	SERPINE1
Regulation of Coagulation (GO:0050818)	1/14	0.0677909	0.264895	0	0	15.4522	41.587	SERPINE1
Regulation of Establishment of Protein Localization (GO:0070201)	1/14	0.0677909	0.264895	0	0	15.4522	41.587	CTSD
Regulation of Extracellular Matrix Disassembly (GO:0010715)	1/14	0.0677909	0.264895	0	0	15.4522	41.587	CLASP1
Extrinsic Apoptotic Signaling Pathway in Absence of Ligand (GO:0097192)	1/14	0.0677909	0.264895	0	0	15.4522	41.587	BCL2L1
Glycogen Catabolic Process (GO:0005980)	1/14	0.0677909	0.264895	0	0	15.4522	41.587	PYGB
Acidic Amino Acid Transport (GO:0015800)	1/14	0.0677909	0.264895	0	0	15.4522	41.587	SLC6A6
Negative Regulation of Smooth Muscle Cell Migration (GO:0014912)	1/14	0.0677909	0.264895	0	0	15.4522	41.587	SERPINE1
Positive Regulation of Cardiac Muscle Cell Proliferation (GO:0060045)	1/14	0.0677909	0.264895	0	0	15.4522	41.587	GLI1
Small GTPase-mediated Signal Transduction (GO:0007264)	3/188	0.0682749	0.264895	0	0	3.2959	8.84691	RRAS;RAPGEF5;RGL2
Regulation of Fatty Acid Oxidation (GO:0046320)	1/15	0.0724552	0.264895	0	0	14.3478	37.6598	APPL2
Regulation of Intrinsic Apoptotic Signaling Pathway in Response to DNA Damage (GO:1902229)	1/15	0.0724552	0.264895	0	0	14.3478	37.6598	BCL2L1
Amyloid-Beta Metabolic Process (GO:0050435)	1/15	0.0724552	0.264895	0	0	14.3478	37.6598	ACE
Regulation of Response to Endoplasmic Reticulum Stress (GO:1905897)	1/15	0.0724552	0.264895	0	0	14.3478	37.6598	USP19
Ceramide Transport (GO:0035627)	1/15	0.0724552	0.264895	0	0	14.3478	37.6598	PLTP
Mitotic Spindle Organization (GO:0007052)	2/90	0.0746819	0.264895	0	0	4.59462	11.9208	PCNT;CLASP1
Negative Regulation of Interleukin-10 Production (GO:0032693)	1/16	0.0770964	0.264895	0	0	13.3906	34.316	TRIB2
Regulation of Fibrinolysis (GO:0051917)	1/16	0.0770964	0.264895	0	0	13.3906	34.316	SERPINE1
Negative Regulation of Protein Processing (GO:0010955)	1/16	0.0770964	0.264895	0	0	13.3906	34.316	SERPINE1
Negative Regulation of Release of Cytochrome C From Mitochondria (GO:0090201)	1/16	0.0770964	0.264895	0	0	13.3906	34.316	BCL2L1
Regulation of Non-Canonical Wnt Signaling Pathway (GO:2000050)	1/16	0.0770964	0.264895	0	0	13.3906	34.316	WNT5B
Regulation of Plasminogen Activation (GO:0010755)	1/16	0.0770964	0.264895	0	0	13.3906	34.316	SERPINE1
Neurotrophin Signaling Pathway (GO:0038179)	1/16	0.0770964	0.264895	0	0	13.3906	34.316	KIDINS220
Peptide Catabolic Process (GO:0043171)	1/16	0.0770964	0.264895	0	0	13.3906	34.316	ACE
Microtubule Depolymerization (GO:0007019)	1/16	0.0770964	0.264895	0	0	13.3906	34.316	NCKAP5
Digestive Tract Morphogenesis (GO:0048546)	1/16	0.0770964	0.264895	0	0	13.3906	34.316	GLI1
Negative Regulation of Angiogenesis (GO:0016525)	2/93	0.0790201	0.264895	0	0	4.44248	11.2752	SERPINE1;EPN1
Regulation of Cell Differentiation (GO:0045595)	3/201	0.0798259	0.264895	0	0	3.07748	7.77957	SLC6A6;NR1D2;CLASP1
B Cell Proliferation (GO:0042100)	1/17	0.0817146	0.264895	0	0	12.553	31.4393	CD40
Epithelial Cell Morphogenesis (GO:0003382)	1/17	0.0817146	0.264895	0	0	12.553	31.4393	CNKSR3
Regulation of Mitochondrial Membrane Permeability (GO:0046902)	1/17	0.0817146	0.264895	0	0	12.553	31.4393	BCL2L1
Immune Response-Regulating Cell Surface Receptor Signaling Pathway (GO:0002768)	1/17	0.0817146	0.264895	0	0	12.553	31.4393	CD40
Negative Regulation of Striated Muscle Cell Differentiation (GO:0051154)	1/17	0.0817146	0.264895	0	0	12.553	31.4393	BHLHE41
Regulation of Nucleocytoplasmic Transport (GO:0046822)	1/17	0.0817146	0.264895	0	0	12.553	31.4393	PTPN14
Ionotropic Glutamate Receptor Signaling Pathway (GO:0035235)	1/17	0.0817146	0.264895	0	0	12.553	31.4393	GRIN3A
Regulation of Protein Sumoylation (GO:0033233)	1/17	0.0817146	0.264895	0	0	12.553	31.4393	EGR1
Carbohydrate Derivative Transport (GO:1901264)	1/17	0.0817146	0.264895	0	0	12.553	31.4393	PLTP
Release of Cytochrome C From Mitochondria (GO:0001836)	1/17	0.0817146	0.264895	0	0	12.553	31.4393	BCL2L1
Polyol Metabolic Process (GO:0019751)	1/17	0.0817146	0.264895	0	0	12.553	31.4393	INPP4B
Response to Ethanol (GO:0045471)	1/17	0.0817146	0.264895	0	0	12.553	31.4393	GRIN3A
Negative Regulation of GTPase Activity (GO:0034260)	1/17	0.0817146	0.264895	0	0	12.553	31.4393	GPSM1
Positive Regulation of Cardiac Muscle Tissue Growth (GO:0055023)	1/17	0.0817146	0.264895	0	0	12.553	31.4393	GLI1
Positive Regulation of Cartilage Development (GO:0061036)	1/17	0.0817146	0.264895	0	0	12.553	31.4393	GDF6
Regulation of Brown Fat Cell Differentiation (GO:0090335)	1/17	0.0817146	0.264895	0	0	12.553	31.4393	RREB1
Negative Regulation of Anoikis (GO:2000811)	1/17	0.0817146	0.264895	0	0	12.553	31.4393	BCL2L1
Stress-Activated Protein Kinase Signaling Cascade (GO:0031098)	1/17	0.0817146	0.264895	0	0	12.553	31.4393	MAP2K3
Sulfur Amino Acid Metabolic Process (GO:0000096)	1/17	0.0817146	0.264895	0	0	12.553	31.4393	FMO1
Regulation of mRNA Splicing, via Spliceosome (GO:0048024)	2/97	0.0849237	0.271153	0	0	4.25456	10.4918	RBFOX1;SRSF2
Regulation of Protein Localization (GO:0032880)	2/97	0.0849237	0.271153	0	0	4.25456	10.4918	PLEKHM2;CTSD
Regulation of Integrin-Mediated Signaling Pathway (GO:2001044)	1/18	0.08631	0.271153	0	0	11.814	28.9421	LIMS2
Regulation of Steroid Biosynthetic Process (GO:0050810)	1/18	0.08631	0.271153	0	0	11.814	28.9421	EGR1
Purine Ribonucleotide Catabolic Process (GO:0009154)	1/18	0.08631	0.271153	0	0	11.814	28.9421	PDE4A
Positive Regulation of Alpha-Beta T Cell Activation (GO:0046635)	1/18	0.08631	0.271153	0	0	11.814	28.9421	HSPH1
Positive Regulation of Supramolecular Fiber Organization (GO:1902905)	2/98	0.0864202	0.271153	0	0	4.21003	10.3084	CLIP1;CLASP1
Positive Regulation of Cold-Induced Thermogenesis (GO:0120162)	2/99	0.0879246	0.272648	0	0	4.16642	10.1297	FABP4;APPL2
Regulation of Angiogenesis (GO:0045765)	3/211	0.0892518	0.272648	0	0	2.92803	7.07499	CD40;RRAS;SERPINE1
Negative Regulation of Endopeptidase Activity (GO:0010951)	1/19	0.0908825	0.272648	0	0	11.1571	26.7569	SERPINE1
Import Into Cell (GO:0098657)	1/19	0.0908825	0.272648	0	0	11.1571	26.7569	SLC27A6
Antigen Processing and Presentation of Peptide Antigen via MHC Class I (GO:0002474)	1/19	0.0908825	0.272648	0	0	11.1571	26.7569	ACE
Regulation of Protein Neddylation (GO:2000434)	1/19	0.0908825	0.272648	0	0	11.1571	26.7569	DCUN1D2
Regulation of Smooth Muscle Cell Migration (GO:0014910)	1/19	0.0908825	0.272648	0	0	11.1571	26.7569	SERPINE1
Phosphatidylcholine Biosynthetic Process (GO:0006656)	1/19	0.0908825	0.272648	0	0	11.1571	26.7569	CHPT1
Positive Regulation of Cell Cycle Phase Transition (GO:1901989)	1/19	0.0908825	0.272648	0	0	11.1571	26.7569	GLI1
Positive Regulation of Endothelial Cell Apoptotic Process (GO:2000353)	1/19	0.0908825	0.272648	0	0	11.1571	26.7569	CD40
Regulation of Defense Response (GO:0031347)	2/103	0.0940199	0.274268	0	0	4.00061	9.45843	NR1D2;APPL2
Energy Reserve Metabolic Process (GO:0006112)	1/20	0.0954324	0.274268	0	0	10.5694	24.831	PHKG1
Regulation of Endopeptidase Activity (GO:0052548)	1/20	0.0954324	0.274268	0	0	10.5694	24.831	SERPINE1
Regulation of Fibroblast Migration (GO:0010762)	1/20	0.0954324	0.274268	0	0	10.5694	24.831	APPL2
Positive Regulation of Monocyte Chemotaxis (GO:0090026)	1/20	0.0954324	0.274268	0	0	10.5694	24.831	SERPINE1
High-Density Lipoprotein Particle Remodeling (GO:0034375)	1/20	0.0954324	0.274268	0	0	10.5694	24.831	PLTP
Reg of Mt Outer Membrane Permeabilization Inv in Apoptotic Sgnlng Pway (GO:1901028)	1/20	0.0954324	0.274268	0	0	10.5694	24.831	BCL2L1
Protein Neddylation (GO:0045116)	1/20	0.0954324	0.274268	0	0	10.5694	24.831	DCUN1D2
Positive Regulation of G2/M Transition of Mitotic Cell Cycle (GO:0010971)	1/20	0.0954324	0.274268	0	0	10.5694	24.831	CCND1
Positive Regulation of Blood Coagulation (GO:0030194)	1/20	0.0954324	0.274268	0	0	10.5694	24.831	SERPINE1
Calcium Ion Homeostasis (GO:0055074)	2/105	0.0971125	0.277929	0	0	3.92253	9.14689	CD40;STC2
Regulation of Dendritic Spine Development (GO:0060998)	1/21	0.0999598	0.277937	0	0	10.0404	23.1229	GRIN3A
NADP Metabolic Process (GO:0006739)	1/21	0.0999598	0.277937	0	0	10.0404	23.1229	FMO1
Positive Regulation of Smoothened Signaling Pathway (GO:0045880)	1/21	0.0999598	0.277937	0	0	10.0404	23.1229	GLI1
Cellular Response to Nerve Growth Factor Stimulus (GO:1990090)	1/21	0.0999598	0.277937	0	0	10.0404	23.1229	KIDINS220
Regulation of Cardiac Muscle Cell Proliferation (GO:0060043)	1/21	0.0999598	0.277937	0	0	10.0404	23.1229	GLI1
Negative Regulation of Biomineral Tissue Development (GO:0070168)	1/21	0.0999598	0.277937	0	0	10.0404	23.1229	ASPN
Positive Regulation of Extracellular Matrix Organization (GO:1903055)	1/21	0.0999598	0.277937	0	0	10.0404	23.1229	CLASP1
Positive Regulation of DNA Metabolic Process (GO:0051054)	2/108	0.101805	0.281314	0	0	3.81094	8.70683	WEE1;GLI1
Negative Regulation of Microtubule Depolymerization (GO:0007026)	1/22	0.104465	0.281314	0	0	9.56181	21.5992	CLASP1
Positive Regulation of Nervous System Process (GO:0031646)	1/22	0.104465	0.281314	0	0	9.56181	21.5992	CDK18
Positive Regulation of p38MAPK Cascade (GO:1900745)	1/22	0.104465	0.281314	0	0	9.56181	21.5992	GDF6
Inositol Phosphate Metabolic Process (GO:0043647)	1/22	0.104465	0.281314	0	0	9.56181	21.5992	INPP4B
Regulation of Anoikis (GO:2000209)	1/22	0.104465	0.281314	0	0	9.56181	21.5992	BCL2L1
Regulation of Biosynthetic Process (GO:0009889)	1/22	0.104465	0.281314	0	0	9.56181	21.5992	STC2
Positive Regulation of Cholesterol Efflux (GO:0010875)	1/22	0.104465	0.281314	0	0	9.56181	21.5992	PLTP
Glycerophospholipid Biosynthetic Process (GO:0046474)	2/110	0.104968	0.281561	0	0	3.73998	8.4303	INPP4B;CHPT1
Negative Regulation of Hippo Signaling (GO:0035331)	1/23	0.108947	0.286615	0	0	9.12672	20.2329	MAP2K3
Negative Regulation of Peptidase Activity (GO:0010466)	1/23	0.108947	0.286615	0	0	9.12672	20.2329	SERPINE1
Regulation of ERAD Pathway (GO:1904292)	1/23	0.108947	0.286615	0	0	9.12672	20.2329	USP19
Positive Regulation of Cell Cycle G2/M Phase Transition (GO:1902751)	1/23	0.108947	0.286615	0	0	9.12672	20.2329	CCND1
Positive Regulation of Cell-Substrate Junction Organization (GO:0150117)	1/23	0.108947	0.286615	0	0	9.12672	20.2329	IQSEC1
Lipid Transport (GO:0006869)	2/113	0.109762	0.286856	0	0	3.63835	8.03872	FABP4;PLTP
Transforming Growth Factor Beta Receptor Superfamily Signaling Pathway (GO:0141091)	2/114	0.111373	0.286856	0	0	3.60569	7.91401	GDF6;APPL2
Endothelial Cell Development (GO:0001885)	1/24	0.113408	0.286856	0	0	8.72947	19.002	CNKSR3
Positive Regulation of Morphogenesis of an Epithelium (GO:1905332)	1/24	0.113408	0.286856	0	0	8.72947	19.002	WNT5B
Negative Regulation of Protein Localization to Cell Periphery (GO:1904376)	1/24	0.113408	0.286856	0	0	8.72947	19.002	BCL2L1
Negative Regulation of Response to Wounding (GO:1903035)	1/24	0.113408	0.286856	0	0	8.72947	19.002	SERPINE1
Negative Regulation of Stress Fiber Assembly (GO:0051497)	1/24	0.113408	0.286856	0	0	8.72947	19.002	CLASP1
Regulation of Myotube Differentiation (GO:0010830)	1/24	0.113408	0.286856	0	0	8.72947	19.002	BHLHE41
Metanephros Development (GO:0001656)	1/24	0.113408	0.286856	0	0	8.72947	19.002	GDF6
Regulation of Cellular Response to Growth Factor Stimulus (GO:0090287)	1/24	0.113408	0.286856	0	0	8.72947	19.002	TMEM204
Epithelial Cell Development (GO:0002064)	1/25	0.117846	0.286856	0	0	8.36532	17.8882	WNT5B
Negative Regulation of Intrinsic Apoptotic Signaling Pathway in Response to DNA Damage (GO:1902230)	1/25	0.117846	0.286856	0	0	8.36532	17.8882	BCL2L1
Negative Regulation of Protein Depolymerization (GO:1901880)	1/25	0.117846	0.286856	0	0	8.36532	17.8882	CLASP1
Activin Receptor Signaling Pathway (GO:0032924)	1/25	0.117846	0.286856	0	0	8.36532	17.8882	GDF6
Antigen Processing and Presentation of Exogenous Peptide Antigen via MHC Class II (GO:0019886)	1/25	0.117846	0.286856	0	0	8.36532	17.8882	CTSD
Regulation of Protein Export From Nucleus (GO:0046825)	1/25	0.117846	0.286856	0	0	8.36532	17.8882	PTPN14
Lymphocyte Proliferation (GO:0046651)	1/25	0.117846	0.286856	0	0	8.36532	17.8882	CD40
Carboxylic Acid Catabolic Process (GO:0046395)	1/25	0.117846	0.286856	0	0	8.36532	17.8882	FMO1
Organophosphate Ester Transport (GO:0015748)	1/25	0.117846	0.286856	0	0	8.36532	17.8882	PLTP
Sulfur Compound Catabolic Process (GO:0044273)	1/25	0.117846	0.286856	0	0	8.36532	17.8882	FMO1
Sulfur Compound Transport (GO:0072348)	1/25	0.117846	0.286856	0	0	8.36532	17.8882	SLC25A26
Positive Regulation of Transcription by RNA Polymerase II (GO:0045944)	8/983	0.118765	0.288069	0	0	1.68785	3.59614	EGR1;CD40;HLF;MICAL2;TAF4B;NR1D2;GLI1;RREB1
Negative Regulation of Endothelial Cell Apoptotic Process (GO:2000352)	1/26	0.122262	0.289368	0	0	8.0303	16.8764	SERPINE1
Negative Regulation of Fatty Acid Metabolic Process (GO:0045922)	1/26	0.122262	0.289368	0	0	8.0303	16.8764	APPL2
Reg of Endoplasmic Reticulum Stress-Induced Intrinsic Apoptotic Sgnlng Pway (GO:1902235)	1/26	0.122262	0.289368	0	0	8.0303	16.8764	BCL2L1
Macromolecule Methylation (GO:0043414)	1/26	0.122262	0.289368	0	0	8.0303	16.8764	SLC25A26
Regulation of Vascular Endothelial Growth Factor Receptor Signaling Pathway (GO:0030947)	1/26	0.122262	0.289368	0	0	8.0303	16.8764	TMEM204
Microtubule Polymerization or Depolymerization (GO:0031109)	1/26	0.122262	0.289368	0	0	8.0303	16.8764	NCKAP5
Regulation of Chondrocyte Differentiation (GO:0032330)	1/26	0.122262	0.289368	0	0	8.0303	16.8764	GDF6
Positive Regulation of Developmental Process (GO:0051094)	3/245	0.124483	0.29268	0	0	2.51231	5.23461	SLC6A6;RREB1;CLASP1
Negative Regulation of Protein Localization to Plasma Membrane (GO:1903077)	1/27	0.126657	0.29268	0	0	7.72106	15.9538	BCL2L1
Regulation of Microtubule Polymerization or Depolymerization (GO:0031110)	1/27	0.126657	0.29268	0	0	7.72106	15.9538	CLASP1
Amide Transport (GO:0042886)	1/27	0.126657	0.29268	0	0	7.72106	15.9538	PLTP
Antigen Processing and Presentation of Peptide Antigen via MHC Class II (GO:0002495)	1/27	0.126657	0.29268	0	0	7.72106	15.9538	CTSD
Cellular Catabolic Process (GO:0044248)	1/27	0.126657	0.29268	0	0	7.72106	15.9538	ACE
Negative Regulation of Actin Filament Bundle Assembly (GO:0032232)	1/27	0.126657	0.29268	0	0	7.72106	15.9538	CLASP1
Regulation of Microtubule Depolymerization (GO:0031114)	1/28	0.131029	0.297754	0	0	7.43472	15.1098	CLASP1
Regulation of Monocyte Chemotaxis (GO:0090025)	1/28	0.131029	0.297754	0	0	7.43472	15.1098	SERPINE1
Amino Acid Import Across Plasma Membrane (GO:0089718)	1/28	0.131029	0.297754	0	0	7.43472	15.1098	SLC6A6
Regulation of Toll-Like Receptor 4 Signaling Pathway (GO:0034143)	1/28	0.131029	0.297754	0	0	7.43472	15.1098	APPL2
Positive Regulation of Cholesterol Transport (GO:0032376)	1/28	0.131029	0.297754	0	0	7.43472	15.1098	PLTP
Golgi Organization (GO:0007030)	2/128	0.134536	0.303607	0	0	3.20279	6.42455	PLEKHM2;CLASP1
Negative Regulation of Cytoskeleton Organization (GO:0051494)	1/29	0.13538	0.303607	0	0	7.16883	14.3353	CLASP1
Negative Regulation of Protein Localization to Membrane (GO:1905476)	1/29	0.13538	0.303607	0	0	7.16883	14.3353	BCL2L1
Regulation of Blood Coagulation (GO:0030193)	1/29	0.13538	0.303607	0	0	7.16883	14.3353	SERPINE1
Regulation of Neuron Apoptotic Process (GO:0043523)	2/129	0.13623	0.304515	0	0	3.17741	6.33387	EGR1;UNC5B
Negative Regulation of Cytokine Production Involved in Inflammatory Response (GO:1900016)	1/30	0.13971	0.308262	0	0	6.92128	13.6224	APPL2
Very Long-Chain Fatty Acid Metabolic Process (GO:0000038)	1/30	0.13971	0.308262	0	0	6.92128	13.6224	SLC27A6
Negative Regulation of Response to Endoplasmic Reticulum Stress (GO:1903573)	1/30	0.13971	0.308262	0	0	6.92128	13.6224	BCL2L1
Negative Regulation of Cell-Matrix Adhesion (GO:0001953)	1/30	0.13971	0.308262	0	0	6.92128	13.6224	SERPINE1
Regulation of Response to External Stimulus (GO:0032101)	2/132	0.141342	0.310018	0	0	3.10361	6.07245	NR1D2;APPL2
Chemical Synaptic Transmission (GO:0007268)	3/260	0.141412	0.310018	0	0	2.36387	4.62393	UNC13C;GRIN3A;GRM7
Establishment of Mitotic Spindle Orientation (GO:0000132)	1/31	0.144017	0.310214	0	0	6.69024	12.9645	GPSM1
Positive Regulation of Lamellipodium Organization (GO:1902745)	1/31	0.144017	0.310214	0	0	6.69024	12.9645	RREB1
Antigen Processing and Presentation of Exogenous Peptide Antigen (GO:0002478)	1/31	0.144017	0.310214	0	0	6.69024	12.9645	CTSD
Natural Killer Cell Mediated Immunity (GO:0002228)	1/31	0.144017	0.310214	0	0	6.69024	12.9645	PLEKHM2
Negative Regulation of Blood Coagulation (GO:0030195)	1/31	0.144017	0.310214	0	0	6.69024	12.9645	SERPINE1
Positive Regulation of Multicellular Organismal Process (GO:0051240)	4/407	0.146955	0.310214	0	0	2.01582	3.8656	FABP4;SERPINE1;RREB1;APPL2
Negative Regulation of Fat Cell Differentiation (GO:0045599)	1/32	0.148304	0.310214	0	0	6.4741	12.3558	TRIB2
Apoptotic Mitochondrial Changes (GO:0008637)	1/32	0.148304	0.310214	0	0	6.4741	12.3558	BCL2L1
Mitochondrial Membrane Organization (GO:0007006)	1/32	0.148304	0.310214	0	0	6.4741	12.3558	BCL2L1
Response to Alcohol (GO:0097305)	1/32	0.148304	0.310214	0	0	6.4741	12.3558	GRIN3A
Chondrocyte Differentiation (GO:0002062)	1/32	0.148304	0.310214	0	0	6.4741	12.3558	WNT5B
Natural Killer Cell Mediated Cytotoxicity (GO:0042267)	1/32	0.148304	0.310214	0	0	6.4741	12.3558	PLEKHM2
Negative Regulation of G1/S Transition of Mitotic Cell Cycle (GO:2000134)	1/32	0.148304	0.310214	0	0	6.4741	12.3558	WEE1
Negative Regulation of Cellular Response to Insulin Stimulus (GO:1900077)	1/32	0.148304	0.310214	0	0	6.4741	12.3558	APPL2
Regulation of Cholesterol Efflux (GO:0010874)	1/32	0.148304	0.310214	0	0	6.4741	12.3558	PLTP
Positive Regulation of G1/S Transition of Mitotic Cell Cycle (GO:1900087)	1/33	0.152569	0.316235	0	0	6.27146	11.7912	CCND1
Negative Regulation of G2/M Transition of Mitotic Cell Cycle (GO:0010972)	1/33	0.152569	0.316235	0	0	6.27146	11.7912	WEE1
Regulation of Cell Adhesion Mediated by Integrin (GO:0033628)	1/33	0.152569	0.316235	0	0	6.27146	11.7912	SERPINE1
Intracellular Calcium Ion Homeostasis (GO:0006874)	2/140	0.155166	0.320646	0	0	2.92251	5.44539	CD40;STC2
Negative Regulation of Microtubule Polymerization or Depolymerization (GO:0031111)	1/34	0.156813	0.321139	0	0	6.08111	11.2665	CLASP1
Regulation of Response to Biotic Stimulus (GO:0002831)	1/34	0.156813	0.321139	0	0	6.08111	11.2665	APPL2
Regulation of Cell Cycle Phase Transition (GO:1901987)	1/34	0.156813	0.321139	0	0	6.08111	11.2665	CDK18
Positive Regulation of Mononuclear Cell Migration (GO:0071677)	1/35	0.161037	0.324839	0	0	5.90196	10.7777	SERPINE1
Regulation of Mitochondrial Membrane Potential (GO:0051881)	1/35	0.161037	0.324839	0	0	5.90196	10.7777	BCL2L1
Regulation of p38MAPK Cascade (GO:1900744)	1/35	0.161037	0.324839	0	0	5.90196	10.7777	GDF6
Intracellular Receptor Signaling Pathway (GO:0030522)	1/35	0.161037	0.324839	0	0	5.90196	10.7777	NR1D2
Smoothened Signaling Pathway (GO:0007224)	1/35	0.161037	0.324839	0	0	5.90196	10.7777	GLI1
Cellular Component Assembly (GO:0022607)	3/277	0.16147	0.324839	0	0	2.21529	4.03944	CD40;CNKSR3;TSPAN4
Positive Regulation of Immune Effector Process (GO:0002699)	1/36	0.165239	0.326657	0	0	5.73304	10.3216	APPL2
Negative Regulation of Hydrolase Activity (GO:0051346)	1/36	0.165239	0.326657	0	0	5.73304	10.3216	GPSM1
Neutral Amino Acid Transport (GO:0015804)	1/36	0.165239	0.326657	0	0	5.73304	10.3216	SLC6A6
Regulation of D-glucose Import (GO:0046324)	1/36	0.165239	0.326657	0	0	5.73304	10.3216	APPL2
Cellular Response to Vascular Endothelial Growth Factor Stimulus (GO:0035924)	1/36	0.165239	0.326657	0	0	5.73304	10.3216	MAP2K3
Negative Regulation of Cell Cycle G1/S Phase Transition (GO:1902807)	1/36	0.165239	0.326657	0	0	5.73304	10.3216	WEE1
Positive Regulation of Metabolic Process (GO:0009893)	2/147	0.167468	0.330109	0	0	2.78044	4.96854	FABP4;APPL2
Regulation of Cold-Induced Thermogenesis (GO:0120161)	2/148	0.169239	0.331095	0	0	2.76125	4.90521	FABP4;APPL2
Regulation of Release of Cytochrome C From Mitochondria (GO:0090199)	1/37	0.16942	0.331095	0	0	5.57351	9.89507	BCL2L1
Regulation of Sodium Ion Transport (GO:0002028)	1/37	0.16942	0.331095	0	0	5.57351	9.89507	CNKSR3
Phosphate-Containing Compound Metabolic Process (GO:0006796)	2/150	0.172791	0.331646	0	0	2.72366	4.78185	INPP4B;ACYP2
O-glycan Processing (GO:0016266)	1/38	0.173581	0.331646	0	0	5.4226	9.49559	GALNT18
Heart Looping (GO:0001947)	1/38	0.173581	0.331646	0	0	5.4226	9.49559	MICAL2
Regulation of Microtubule Cytoskeleton Organization (GO:0070507)	1/38	0.173581	0.331646	0	0	5.4226	9.49559	CLASP1
Regulation of Peptidyl-Serine Phosphorylation (GO:0033135)	1/38	0.173581	0.331646	0	0	5.4226	9.49559	CNKSR3
mRNA Transcription by RNA Polymerase II (GO:0042789)	1/38	0.173581	0.331646	0	0	5.4226	9.49559	TAF4B
Regulation of Sprouting Angiogenesis (GO:1903670)	1/38	0.173581	0.331646	0	0	5.4226	9.49559	EPN1
Positive Regulation of Exocytosis (GO:0045921)	1/38	0.173581	0.331646	0	0	5.4226	9.49559	CLASP1
Organelle Organization (GO:0006996)	4/437	0.175513	0.334404	0	0	1.87327	3.25956	MICAL3;MICAL2;PLEKHM2;CLASP1
Positive Regulation of SMAD Protein Signal Transduction (GO:0060391)	1/39	0.177721	0.337669	0	0	5.27964	9.1208	GDF6
G2/M Transition of Mitotic Cell Cycle (GO:0000086)	1/40	0.18184	0.344539	0	0	5.144	8.76861	WEE1
Negative Regulation of Kinase Activity (GO:0033673)	1/41	0.185939	0.347458	0	0	5.01515	8.43717	TRIB2
Regulation of Hippo Signaling (GO:0035330)	1/41	0.185939	0.347458	0	0	5.01515	8.43717	MAP2K3
Negative Regulation of Secretion by Cell (GO:1903531)	1/41	0.185939	0.347458	0	0	5.01515	8.43717	GRM7
Monoatomic Cation Transport (GO:0006812)	1/41	0.185939	0.347458	0	0	5.01515	8.43717	GRIN3A
Positive Regulation of Cell Differentiation (GO:0045597)	3/297	0.186091	0.347458	0	0	2.06249	3.46811	SLC6A6;RRAS;GDF6
Positive Regulation of DNA-templated Transcription (GO:0045893)	9/1274	0.186429	0.347458	0	0	1.45693	2.44722	MAP2K3;EGR1;CD40;HLF;MICAL2;NR1D2;GDF6;GLI1;RREB1
Regulation of Receptor-Mediated Endocytosis (GO:0048259)	1/42	0.190018	0.347508	0	0	4.89258	8.12481	SERPINE1
Lysosome Localization (GO:0032418)	1/42	0.190018	0.347508	0	0	4.89258	8.12481	PLEKHM2
Cellular Response to Retinoic Acid (GO:0071300)	1/42	0.190018	0.347508	0	0	4.89258	8.12481	WNT5B
Determination of Heart Left/Right Asymmetry (GO:0061371)	1/42	0.190018	0.347508	0	0	4.89258	8.12481	MICAL2
Digestive Tract Development (GO:0048565)	1/42	0.190018	0.347508	0	0	4.89258	8.12481	GLI1
Embryonic Heart Tube Morphogenesis (GO:0003143)	1/42	0.190018	0.347508	0	0	4.89258	8.12481	MICAL2
Synaptic Vesicle Exocytosis (GO:0016079)	1/43	0.194076	0.347508	0	0	4.77585	7.83004	UNC13C
Positive Regulation of Monoatomic Ion Transport (GO:0043270)	1/43	0.194076	0.347508	0	0	4.77585	7.83004	CNKSR3
Negative Regulation of Mitotic Cell Cycle Phase Transition (GO:1901991)	1/43	0.194076	0.347508	0	0	4.77585	7.83004	WEE1
RNA Transport (GO:0050658)	1/43	0.194076	0.347508	0	0	4.77585	7.83004	RBFOX1
Positive Regulation of Receptor-Mediated Endocytosis (GO:0048260)	1/43	0.194076	0.347508	0	0	4.77585	7.83004	SERPINE1
mRNA Transcription (GO:0009299)	1/43	0.194076	0.347508	0	0	4.77585	7.83004	TAF4B
Cell Cycle G2/M Phase Transition (GO:0044839)	1/43	0.194076	0.347508	0	0	4.77585	7.83004	WEE1
Mitochondrial Transport (GO:0006839)	1/43	0.194076	0.347508	0	0	4.77585	7.83004	BCL2L1
Regulation of Chemokine Production (GO:0032642)	1/43	0.194076	0.347508	0	0	4.77585	7.83004	EGR1
Negative Regulation of Organelle Organization (GO:0010639)	1/44	0.198114	0.351063	0	0	4.66455	7.55149	BCL2L1
Regulation of Microtubule-Based Process (GO:0032886)	1/44	0.198114	0.351063	0	0	4.66455	7.55149	CLASP1
Amino Acid Transport (GO:0006865)	1/44	0.198114	0.351063	0	0	4.66455	7.55149	SLC6A6
Response to Unfolded Protein (GO:0006986)	1/44	0.198114	0.351063	0	0	4.66455	7.55149	HSPH1
Regulation of Nervous System Development (GO:0051960)	1/45	0.202133	0.355421	0	0	4.55831	7.28797	BHLHE41
Cellular Response to Ketone (GO:1901655)	1/45	0.202133	0.355421	0	0	4.55831	7.28797	POSTN
Positive Regulation of Cell-Matrix Adhesion (GO:0001954)	1/45	0.202133	0.355421	0	0	4.55831	7.28797	RRAS
Regulation of Interleukin-10 Production (GO:0032653)	1/46	0.206131	0.358391	0	0	4.45679	7.03836	TRIB2
Regulation of Intrinsic Apoptotic Signaling Pathway (GO:2001242)	1/46	0.206131	0.358391	0	0	4.45679	7.03836	BCL2L1
Regulation of Cell-Cell Adhesion (GO:0022407)	1/46	0.206131	0.358391	0	0	4.45679	7.03836	CNKSR3
Positive Regulation of Apoptotic Process (GO:0043065)	3/313	0.206457	0.358391	0	0	1.95444	3.08345	CD40;CTSD;BCL2L1
BMP Signaling Pathway (GO:0030509)	1/47	0.210109	0.358391	0	0	4.35968	6.80166	GDF6
Positive Regulation of miRNA Transcription (GO:1902895)	1/47	0.210109	0.358391	0	0	4.35968	6.80166	EGR1
Cardiac Conduction (GO:0061337)	1/47	0.210109	0.358391	0	0	4.35968	6.80166	ACE
Cell Surface Receptor Signaling Pathway via JAK-STAT (GO:0007259)	1/47	0.210109	0.358391	0	0	4.35968	6.80166	CD40
Regulation of Trans-Synaptic Signaling (GO:0099177)	1/47	0.210109	0.358391	0	0	4.35968	6.80166	GRIN3A
Mitotic Nuclear Division (GO:0140014)	1/47	0.210109	0.358391	0	0	4.35968	6.80166	CLASP1
Mitotic Spindle Assembly (GO:0090307)	1/47	0.210109	0.358391	0	0	4.35968	6.80166	CLASP1
Positive Regulation of Cytokine-Mediated Signaling Pathway (GO:0001961)	1/47	0.210109	0.358391	0	0	4.35968	6.80166	CD40
Positive Regulation of Kinase Activity (GO:0033674)	1/48	0.214068	0.362432	0	0	4.26671	6.57696	MAP2K3
Regulation of Exocytosis (GO:0017157)	1/48	0.214068	0.362432	0	0	4.26671	6.57696	CLASP1
Fatty Acid Beta-Oxidation (GO:0006635)	1/48	0.214068	0.362432	0	0	4.26671	6.57696	ACAD11
Positive Regulation of Intracellular Transport (GO:0032388)	1/49	0.218007	0.365483	0	0	4.17761	6.36345	PCNT
Translational Elongation (GO:0006414)	1/49	0.218007	0.365483	0	0	4.17761	6.36345	GTPBP2
Carboxylic Acid Transport (GO:0046942)	1/49	0.218007	0.365483	0	0	4.17761	6.36345	SLC6A6
Regulation of Wound Healing (GO:0061041)	1/49	0.218007	0.365483	0	0	4.17761	6.36345	SERPINE1
Protein-Containing Complex Assembly (GO:0065003)	3/323	0.219438	0.366982	0	0	1.8924	2.87017	CD40;CNKSR3;TSPAN4
Negative Regulation of ERK1 and ERK2 Cascade (GO:0070373)	1/50	0.221927	0.368442	0	0	4.09215	6.16035	CNKSR3
Positive Regulation of Cell-Cell Adhesion (GO:0022409)	1/50	0.221927	0.368442	0	0	4.09215	6.16035	CNKSR3
Positive Regulation of Fat Cell Differentiation (GO:0045600)	1/50	0.221927	0.368442	0	0	4.09215	6.16035	RREB1
Transcription Initiation-Coupled Chromatin Remodeling (GO:0045815)	1/51	0.225827	0.372206	0	0	4.0101	5.96697	EGR1
Fatty Acid Oxidation (GO:0019395)	1/51	0.225827	0.372206	0	0	4.0101	5.96697	ACAD11
Regulation of Lipid Metabolic Process (GO:0019216)	1/51	0.225827	0.372206	0	0	4.0101	5.96697	NR1D2
Intrinsic Apoptotic Signaling Pathway in Response to DNA Damage (GO:0008630)	1/52	0.229708	0.376787	0	0	3.93127	5.7827	BCL2L1
Regulation of Cell Development (GO:0060284)	1/52	0.229708	0.376787	0	0	3.93127	5.7827	BHLHE41
Negative Regulation of Immune System Process (GO:0002683)	1/53	0.233569	0.379481	0	0	3.85548	5.60693	TSC22D3
Positive Regulation of miRNA Metabolic Process (GO:2000630)	1/53	0.233569	0.379481	0	0	3.85548	5.60693	EGR1
Regulation of Smoothened Signaling Pathway (GO:0008589)	1/53	0.233569	0.379481	0	0	3.85548	5.60693	GLI1
Cellular Response to Mechanical Stimulus (GO:0071260)	1/53	0.233569	0.379481	0	0	3.85548	5.60693	CD40
Negative Regulation of Cell Migration (GO:0030336)	2/184	0.234621	0.380286	0	0	2.21103	3.20552	SERPINE1;CLASP1
Positive Regulation of Transcription Initiation by RNA Polymerase II (GO:0060261)	1/54	0.237412	0.382093	0	0	3.78254	5.43914	TAF4B
Cellular Response to BMP Stimulus (GO:0071773)	1/54	0.237412	0.382093	0	0	3.78254	5.43914	GDF6
Positive Regulation of Chemokine Production (GO:0032722)	1/54	0.237412	0.382093	0	0	3.78254	5.43914	EGR1
Supramolecular Fiber Organization (GO:0097435)	3/339	0.240544	0.384626	0	0	1.80081	2.56589	CLIP1;SLK;NCKAP5
Regulation of Cytokine Production Involved in Inflammatory Response (GO:1900015)	1/55	0.241235	0.384626	0	0	3.71231	5.27884	APPL2
Positive Regulation of Protein Localization to Plasma Membrane (GO:1903078)	1/55	0.241235	0.384626	0	0	3.71231	5.27884	CNST
Cell Surface Receptor Signaling Pathway via STAT (GO:0097696)	1/55	0.241235	0.384626	0	0	3.71231	5.27884	CD40
Anterograde Trans-Synaptic Signaling (GO:0098916)	2/189	0.243858	0.386191	0	0	2.15137	3.03595	UNC13C;GRM7
Epidermal Cell Differentiation (GO:0009913)	1/56	0.245039	0.386191	0	0	3.64463	5.12558	GLI1
Positive Regulation of Interleukin-1 Beta Production (GO:0032731)	1/56	0.245039	0.386191	0	0	3.64463	5.12558	EGR1
Positive Regulation of Leukocyte Chemotaxis (GO:0002690)	1/56	0.245039	0.386191	0	0	3.64463	5.12558	SERPINE1
Regulation of Proteasomal Protein Catabolic Process (GO:0061136)	1/56	0.245039	0.386191	0	0	3.64463	5.12558	USP19
Negative Regulation of Cytokine Production (GO:0001818)	2/191	0.247558	0.388575	0	0	2.12839	2.97147	TRIB2;APPL2
Negative Regulation of Response to Stimulus (GO:0048585)	1/57	0.248825	0.388575	0	0	3.57937	4.97892	APPL2
Cartilage Development (GO:0051216)	1/57	0.248825	0.388575	0	0	3.57937	4.97892	WNT5B
Cellular Response to Interleukin-1 (GO:0071347)	1/57	0.248825	0.388575	0	0	3.57937	4.97892	EGR1
Regulation of Embryonic Development (GO:0045995)	1/59	0.256339	0.393555	0	0	3.45559	4.70394	CLASP1
Protein Homotetramerization (GO:0051289)	1/59	0.256339	0.393555	0	0	3.45559	4.70394	APPL2
Regulation of Transcription Initiation by RNA Polymerase II (GO:0060260)	1/59	0.256339	0.393555	0	0	3.45559	4.70394	TAF4B
Mitotic DNA Damage Checkpoint Signaling (GO:0044773)	1/59	0.256339	0.393555	0	0	3.45559	4.70394	CCND1
Positive Regulation of DNA-templated Transcription Initiation (GO:2000144)	1/59	0.256339	0.393555	0	0	3.45559	4.70394	TAF4B
Endomembrane System Organization (GO:0010256)	2/196	0.256816	0.393555	0	0	2.07301	2.81804	PLEKHM2;CLASP1
Negative Regulation of Intrinsic Apoptotic Signaling Pathway (GO:2001243)	1/60	0.260068	0.393555	0	0	3.39685	4.57491	BCL2L1
Fatty Acid Catabolic Process (GO:0009062)	1/60	0.260068	0.393555	0	0	3.39685	4.57491	ACAD11
RNA Polymerase II Preinitiation Complex Assembly (GO:0051123)	1/60	0.260068	0.393555	0	0	3.39685	4.57491	TAF4B
Negative Regulation of Protein Kinase Activity (GO:0006469)	1/60	0.260068	0.393555	0	0	3.39685	4.57491	TRIB2
Phosphatidylcholine Metabolic Process (GO:0046470)	1/60	0.260068	0.393555	0	0	3.39685	4.57491	CHPT1
Regulation of SMAD Protein Signal Transduction (GO:0060390)	1/60	0.260068	0.393555	0	0	3.39685	4.57491	GDF6
Response to Retinoic Acid (GO:0032526)	1/60	0.260068	0.393555	0	0	3.39685	4.57491	WNT5B
Positive Regulation of Cell Cycle (GO:0045787)	1/60	0.260068	0.393555	0	0	3.39685	4.57491	USP19
Positive Regulation of Macromolecule Biosynthetic Process (GO:0010557)	3/355	0.26198	0.395573	0	0	1.71755	2.30063	EGR1;ACTA1;HSPH1
Phospholipid Transport (GO:0015914)	1/61	0.263779	0.397212	0	0	3.34007	4.45112	PLTP
Transcription by RNA Polymerase II (GO:0006366)	2/200	0.264227	0.397212	0	0	2.03072	2.70277	TAF4B;RREB1
DNA-templated Transcription Initiation (GO:0006352)	1/62	0.267472	0.400146	0	0	3.28515	4.33226	TAF4B
Negative Regulation of Macromolecule Biosynthetic Process (GO:0010558)	2/202	0.267934	0.400146	0	0	2.0102	2.64747	DDX3Y;STC2
Adenylate Cyclase-Modulating G Protein-Coupled Receptor Signaling Pathway (GO:0007188)	2/202	0.267934	0.400146	0	0	2.0102	2.64747	GRM7;GRM8
Positive Regulation of Interleukin-1 Production (GO:0032732)	1/63	0.271146	0.401436	0	0	3.232	4.21808	EGR1
Positive Regulation of Interleukin-8 Production (GO:0032757)	1/63	0.271146	0.401436	0	0	3.232	4.21808	SERPINE1
Transcription Preinitiation Complex Assembly (GO:0070897)	1/63	0.271146	0.401436	0	0	3.232	4.21808	TAF4B
Canonical Wnt Signaling Pathway (GO:0060070)	1/63	0.271146	0.401436	0	0	3.232	4.21808	WNT5B
G1/S Transition of Mitotic Cell Cycle (GO:0000082)	1/64	0.274801	0.403356	0	0	3.18054	4.10832	CCND1
Positive Regulation of Mitotic Cell Cycle Phase Transition (GO:1901992)	1/64	0.274801	0.403356	0	0	3.18054	4.10832	CCND1
Positive Regulation of Phagocytosis (GO:0050766)	1/64	0.274801	0.403356	0	0	3.18054	4.10832	APPL2
Positive Regulation of Binding (GO:0051099)	1/64	0.274801	0.403356	0	0	3.18054	4.10832	GPSM1
Anterior/Posterior Pattern Specification (GO:0009952)	1/65	0.278439	0.406949	0	0	3.13068	4.00275	BHLHE41
Negative Regulation of Autophagy (GO:0010507)	1/65	0.278439	0.406949	0	0	3.13068	4.00275	BCL2L1
Regulation of miRNA Transcription (GO:1902893)	1/66	0.282059	0.409614	0	0	3.08236	3.90116	EGR1
Cell Cycle G1/S Phase Transition (GO:0044843)	1/66	0.282059	0.409614	0	0	3.08236	3.90116	CCND1
Cell-Cell Junction Organization (GO:0045216)	1/66	0.282059	0.409614	0	0	3.08236	3.90116	LIMS2
Intracellular Monoatomic Cation Homeostasis (GO:0030003)	2/210	0.282757	0.409758	0	0	1.9321	2.44057	CD40;STC2
Regulation of Signal Transduction (GO:0009966)	2/211	0.284609	0.410486	0	0	1.92276	2.41622	TMEM204;GLI1
Regulation of Protein Serine/Threonine Kinase Activity (GO:0071900)	1/67	0.28566	0.410486	0	0	3.03551	3.80335	TRIB2
Negative Regulation of Cell Adhesion (GO:0007162)	1/67	0.28566	0.410486	0	0	3.03551	3.80335	SERPINE1
Regulation of Cellular Localization (GO:0060341)	1/67	0.28566	0.410486	0	0	3.03551	3.80335	PLEKHM2
Protein Phosphorylation (GO:0006468)	3/373	0.286382	0.410661	0	0	1.63249	2.04131	SLK;TRIB2;CLASP1
Extrinsic Apoptotic Signaling Pathway (GO:0097191)	1/68	0.289244	0.413897	0	0	2.99005	3.70911	BCL2L1
Positive Regulation of Intracellular Protein Transport (GO:0090316)	1/69	0.29281	0.416386	0	0	2.94593	3.61829	PCNT
Cell Junction Organization (GO:0034330)	1/69	0.29281	0.416386	0	0	2.94593	3.61829	LIMS2
Phosphatidylinositol Metabolic Process (GO:0046488)	1/69	0.29281	0.416386	0	0	2.94593	3.61829	INPP4B
Regulation of Phosphatidylinositol 3-Kinase/Protein Kinase B Signal Transduction (GO:0051896)	2/219	0.299405	0.424687	0	0	1.85112	2.23238	RRAS;UNC5B
Positive Regulation of Proteasomal Ubiquitin-Dependent Protein Catabolic Process (GO:0032436)	1/71	0.299888	0.424687	0	0	2.86147	3.4462	TRIB2
Cellular Response to Oxygen-Containing Compound (GO:1901701)	3/384	0.301393	0.425936	0	0	1.58446	1.90031	EGR1;WNT5B;SERPINE1
Kidney Development (GO:0001822)	1/72	0.303401	0.427009	0	0	2.82103	3.36463	GDF6
Monocarboxylic Acid Transport (GO:0015718)	1/72	0.303401	0.427009	0	0	2.82103	3.36463	FABP4
Regulation of ERK1 and ERK2 Cascade (GO:0070372)	2/223	0.306787	0.429279	0	0	1.81725	2.14727	RRAS;CNKSR3
Regulation of MAP Kinase Activity (GO:0043405)	1/73	0.306897	0.429279	0	0	2.78171	3.28587	TRIB2
Spindle Assembly (GO:0051225)	1/73	0.306897	0.429279	0	0	2.78171	3.28587	CLASP1
Negative Regulation of Apoptotic Signaling Pathway (GO:2001234)	1/74	0.310375	0.433258	0	0	2.74346	3.20978	BCL2L1
Regulation of Fat Cell Differentiation (GO:0045598)	1/75	0.313836	0.434542	0	0	2.70625	3.13623	TRIB2
Positive Regulation of Secretion by Cell (GO:1903532)	1/75	0.313836	0.434542	0	0	2.70625	3.13623	CLASP1
Import Into Nucleus (GO:0051170)	1/75	0.313836	0.434542	0	0	2.70625	3.13623	APPL2
Regulation of Stress Fiber Assembly (GO:0051492)	1/75	0.313836	0.434542	0	0	2.70625	3.13623	CLASP1
Transforming Growth Factor Beta Receptor Signaling Pathway (GO:0007179)	1/76	0.31728	0.436659	0	0	2.67003	3.06512	APPL2
Negative Regulation of Supramolecular Fiber Organization (GO:1902904)	1/76	0.31728	0.436659	0	0	2.67003	3.06512	CLASP1
Protein Deubiquitination (GO:0016579)	1/76	0.31728	0.436659	0	0	2.67003	3.06512	USP19
Apoptotic Process (GO:0006915)	2/232	0.323342	0.444108	0	0	1.74534	1.97057	GDF6;BCL2L1
Positive Regulation of Macroautophagy (GO:0016239)	1/78	0.324116	0.444279	0	0	2.60042	2.92977	GPSM1
Cellular Response to Lipid (GO:0071396)	2/234	0.327008	0.447138	0	0	1.73012	1.93388	WNT5B;SERPINE1
Positive Regulation of Protein Modification by Small Protein Conjugation or Removal (GO:1903322)	1/79	0.327509	0.447138	0	0	2.56695	2.86534	DCUN1D2
Protein Import Into Nucleus (GO:0006606)	1/80	0.330885	0.450847	0	0	2.53433	2.80293	APPL2
Regulation of Gene Expression (GO:0010468)	7/1127	0.333366	0.451823	0	0	1.2621	1.38643	DDX3Y;EGR1;ACTA1;STC2;NR1D2;GLI1;RREB1
Regulation of Cytokinesis (GO:0032465)	1/81	0.334244	0.451823	0	0	2.50253	2.74248	BCL2L1
Negative Regulation of Neuron Apoptotic Process (GO:0043524)	1/81	0.334244	0.451823	0	0	2.50253	2.74248	UNC5B
Protein Modification by Small Protein Removal (GO:0070646)	1/81	0.334244	0.451823	0	0	2.50253	2.74248	USP19
Regulation of Interleukin-1 Beta Production (GO:0032651)	1/82	0.337586	0.454545	0	0	2.47151	2.6839	EGR1
Response to Insulin (GO:0032868)	1/82	0.337586	0.454545	0	0	2.47151	2.6839	TBC1D4
Regulation of Interleukin-8 Production (GO:0032677)	1/83	0.340912	0.455437	0	0	2.44124	2.6271	SERPINE1
Wnt Signaling Pathway (GO:0016055)	1/83	0.340912	0.455437	0	0	2.44124	2.6271	WNT5B
Organophosphate Metabolic Process (GO:0019637)	1/83	0.340912	0.455437	0	0	2.44124	2.6271	INPP4B
Protein Tetramerization (GO:0051262)	1/83	0.340912	0.455437	0	0	2.44124	2.6271	APPL2
Vascular Transport (GO:0010232)	1/84	0.344221	0.457114	0	0	2.41171	2.57202	SLC6A6
+ Reg of Transmembrane Receptor Prot Serine/Threonine Kinase Sgnlng Pway (GO:0090100)	1/84	0.344221	0.457114	0	0	2.41171	2.57202	GDF6
Macromolecule Modification (GO:0043412)	1/84	0.344221	0.457114	0	0	2.41171	2.57202	SLC25A26
Negative Regulation of Transforming Growth Factor Beta Receptor Signaling Pathway (GO:0030512)	1/85	0.347513	0.457114	0	0	2.38288	2.51859	ASPN
Long-Chain Fatty Acid Metabolic Process (GO:0001676)	1/85	0.347513	0.457114	0	0	2.38288	2.51859	SLC27A6
Carbohydrate Metabolic Process (GO:0005975)	1/85	0.347513	0.457114	0	0	2.38288	2.51859	PHKG1
Regulation of Cell Division (GO:0051302)	1/85	0.347513	0.457114	0	0	2.38288	2.51859	BCL2L1
Positive Regulation of Endocytosis (GO:0045807)	1/85	0.347513	0.457114	0	0	2.38288	2.51859	SERPINE1
Epidermis Development (GO:0008544)	1/86	0.35079	0.458151	0	0	2.35472	2.46673	GLI1
Transport Across Blood-Brain Barrier (GO:0150104)	1/86	0.35079	0.458151	0	0	2.35472	2.46673	SLC6A6
Regulation of Innate Immune Response (GO:0045088)	1/86	0.35079	0.458151	0	0	2.35472	2.46673	APPL2
Positive Regulation of Programmed Cell Death (GO:0043068)	2/248	0.352519	0.458151	0	0	1.6305	1.70004	CTSD;BCL2L1
Positive Regulation of Biosynthetic Process (GO:0009891)	1/87	0.35405	0.458151	0	0	2.32723	2.4164	EGR1
Defense Response to Gram-negative Bacterium (GO:0050829)	1/87	0.35405	0.458151	0	0	2.32723	2.4164	SERPINE1
Sodium Ion Transmembrane Transport (GO:0035725)	1/87	0.35405	0.458151	0	0	2.32723	2.4164	SLC6A6
Regulation of Inflammatory Response (GO:0050727)	2/249	0.35433	0.458151	0	0	1.62381	1.68475	SERPINE1;NR1D2
Positive Regulation of Cell Motility (GO:2000147)	2/249	0.35433	0.458151	0	0	1.62381	1.68475	WNT5B;GLI1
Regulation of Endothelial Cell Migration (GO:0010594)	1/88	0.357294	0.458516	0	0	2.30036	2.36752	RRAS
Positive Regulation of Protein Kinase Activity (GO:0045860)	1/88	0.357294	0.458516	0	0	2.30036	2.36752	MAP2K3
Regulation of Mitotic Cell Cycle Phase Transition (GO:1901990)	1/88	0.357294	0.458516	0	0	2.30036	2.36752	APPL2
Positive Regulation of Ubiquitin-Dependent Protein Catabolic Process (GO:2000060)	1/88	0.357294	0.458516	0	0	2.30036	2.36752	TRIB2
Establishment of Protein Localization to Organelle (GO:0072594)	1/90	0.363733	0.463093	0	0	2.24844	2.27393	APPL2
Regulation of Protein Localization to Plasma Membrane (GO:1903076)	1/90	0.363733	0.463093	0	0	2.24844	2.27393	BCL2L1
Protein Dephosphorylation (GO:0006470)	1/90	0.363733	0.463093	0	0	2.24844	2.27393	PTPN14
Cytokine-Mediated Signaling Pathway (GO:0019221)	2/255	0.365156	0.463093	0	0	1.58482	1.5966	EGR1;APPL2
Regulation of Epithelial to Mesenchymal Transition (GO:0010717)	1/91	0.366929	0.463093	0	0	2.22334	2.2291	CLASP1
ERAD Pathway (GO:0036503)	1/91	0.366929	0.463093	0	0	2.22334	2.2291	USP19
Protein O-linked Glycosylation (GO:0006493)	1/91	0.366929	0.463093	0	0	2.22334	2.2291	GALNT18
Phosphatidylinositol Biosynthetic Process (GO:0006661)	1/91	0.366929	0.463093	0	0	2.22334	2.2291	INPP4B
Positive Regulation of Signal Transduction (GO:0009967)	2/256	0.366954	0.463093	0	0	1.5785	1.58248	GLI1;LIMS2
Glucose Homeostasis (GO:0042593)	1/92	0.370109	0.463653	0	0	2.1988	2.18552	APPL2
Positive Regulation of Response to Stimulus (GO:0048584)	1/92	0.370109	0.463653	0	0	2.1988	2.18552	CNKSR3
Sensory Perception of Mechanical Stimulus (GO:0050954)	1/92	0.370109	0.463653	0	0	2.1988	2.18552	GRM7
Positive Regulation of Cell Adhesion (GO:0045785)	1/92	0.370109	0.463653	0	0	2.1988	2.18552	CNKSR3
Lipid Metabolic Process (GO:0006629)	2/259	0.372336	0.46559	0	0	1.55983	1.54105	CHPT1;PLTP
Regulation of Protein Metabolic Process (GO:0051246)	1/93	0.373273	0.46591	0	0	2.17479	2.14314	ACE
Regulation of MAPK Cascade (GO:0043408)	2/260	0.374126	0.466124	0	0	1.55371	1.52755	CD40;RRAS
Regulation of Immune Response (GO:0050776)	1/94	0.376421	0.467281	0	0	2.1513	2.10192	APPL2
Cellular Response to Peptide Hormone Stimulus (GO:0071375)	1/94	0.376421	0.467281	0	0	2.1513	2.10192	TBC1D4
B Cell Activation (GO:0042113)	1/96	0.382671	0.472467	0	0	2.10579	2.02279	CD40
Sensory Perception of Sound (GO:0007605)	1/96	0.382671	0.472467	0	0	2.10579	2.02279	GRM7
Sodium Ion Transport (GO:0006814)	1/96	0.382671	0.472467	0	0	2.10579	2.02279	SLC6A6
Positive Regulation of Proteasomal Protein Catabolic Process (GO:1901800)	1/98	0.388858	0.477521	0	0	2.06217	1.9478	TRIB2
Positive Regulation of Protein Modification Process (GO:0031401)	1/98	0.388858	0.477521	0	0	2.06217	1.9478	EGR1
Cellular Response to Transforming Growth Factor Beta Stimulus (GO:0071560)	1/98	0.388858	0.477521	0	0	2.06217	1.9478	APPL2
Positive Regulation of Neuron Projection Development (GO:0010976)	1/99	0.391929	0.47957	0	0	2.04102	1.91177	KIDINS220
Positive Regulation of Autophagy (GO:0010508)	1/99	0.391929	0.47957	0	0	2.04102	1.91177	GPSM1
Response to UV (GO:0009411)	1/100	0.394984	0.481585	0	0	2.0203	1.87668	CCND1
Monoatomic Ion Transport (GO:0006811)	1/100	0.394984	0.481585	0	0	2.0203	1.87668	SLC25A26
Visual Perception (GO:0007601)	1/101	0.398025	0.482711	0	0	2	1.84248	GRM8
Hemopoiesis (GO:0030097)	1/101	0.398025	0.482711	0	0	2	1.84248	RRAS
Sensory Perception of Light Stimulus (GO:0050953)	1/101	0.398025	0.482711	0	0	2	1.84248	GRM8
Regulation of RNA Biosynthetic Process (GO:2001141)	3/465	0.411786	0.498516	0	0	1.30125	1.15453	NR1D2;GLI1;RREB1
Regulation of Macroautophagy (GO:0016241)	1/106	0.413001	0.499103	0	0	1.90428	1.68397	GPSM1
Axon Development (GO:0061564)	1/107	0.415951	0.500019	0	0	1.88622	1.65457	GRM7
Protein Catabolic Process (GO:0030163)	1/107	0.415951	0.500019	0	0	1.88622	1.65457	CTSD
Dephosphorylation (GO:0016311)	1/107	0.415951	0.500019	0	0	1.88622	1.65457	PTPN14
Cellular Response to Insulin Stimulus (GO:0032869)	1/108	0.418887	0.502665	0	0	1.8685	1.62588	TBC1D4
Regulation of Proteasomal Ubiquitin-Dependent Protein Catabolic Process (GO:0032434)	1/109	0.421809	0.505284	0	0	1.8511	1.59788	TRIB2
Negative Regulation of Apoptotic Process (GO:0043066)	3/475	0.425157	0.507784	0	0	1.27302	1.08881	UNC5B;SERPINE1;BCL2L1
Negative Regulation of Developmental Process (GO:0051093)	1/111	0.427608	0.507784	0	0	1.81726	1.54385	GRIN3A
External Encapsulating Structure Organization (GO:0045229)	1/111	0.427608	0.507784	0	0	1.81726	1.54385	POSTN
Extracellular Structure Organization (GO:0043062)	1/111	0.427608	0.507784	0	0	1.81726	1.54385	POSTN
Regulation of Cellular Response to Stress (GO:0080135)	1/111	0.427608	0.507784	0	0	1.81726	1.54385	USP19
Nervous System Development (GO:0007399)	3/480	0.431805	0.51188	0	0	1.25935	1.05758	RBFOX1;RAPGEF5;GFRA2
Regulation of Primary Metabolic Process (GO:0080090)	1/113	0.433349	0.512822	0	0	1.78463	1.49233	NR1D2
Positive Regulation of Wnt Signaling Pathway (GO:0030177)	1/114	0.436199	0.515093	0	0	1.76875	1.46746	WNT5B
Negative Regulation of Intracellular Signal Transduction (GO:1902532)	2/297	0.43876	0.515093	0	0	1.35628	1.11731	MAP2K3;BCL2L1
Positive Regulation of Inflammatory Response (GO:0050729)	1/115	0.439034	0.515093	0	0	1.75315	1.44315	SERPINE1
Intrinsic Apoptotic Signaling Pathway (GO:0097193)	1/115	0.439034	0.515093	0	0	1.75315	1.44315	BCL2L1
Positive Regulation of Cell Projection Organization (GO:0031346)	1/115	0.439034	0.515093	0	0	1.75315	1.44315	KIDINS220
Phosphorylation (GO:0016310)	2/298	0.440459	0.51588	0	0	1.35163	1.10825	TRIB2;CLASP1
Negative Regulation of Canonical Wnt Signaling Pathway (GO:0090090)	1/117	0.444662	0.519912	0	0	1.72274	1.39618	GLI1
Positive Regulation of Epithelial Cell Proliferation (GO:0050679)	1/118	0.447455	0.522285	0	0	1.70793	1.37349	RREB1
MAPK Cascade (GO:0000165)	1/119	0.450234	0.523269	0	0	1.69337	1.35129	MAP2K3
Positive Regulation of Cell Cycle Process (GO:0090068)	1/119	0.450234	0.523269	0	0	1.69337	1.35129	USP19
Monoatomic Cation Transmembrane Transport (GO:0098655)	2/304	0.450593	0.523269	0	0	1.32437	1.05578	SLC6A6;GRIN3A
Regulation of Transforming Growth Factor Beta Receptor Signaling Pathway (GO:0017015)	1/120	0.452999	0.523398	0	0	1.67906	1.32959	ASPN
Mitotic Sister Chromatid Segregation (GO:0000070)	1/120	0.452999	0.523398	0	0	1.67906	1.32959	CLASP1
Negative Regulation of Catabolic Process (GO:0009895)	1/120	0.452999	0.523398	0	0	1.67906	1.32959	BCL2L1
Enzyme-Linked Receptor Protein Signaling Pathway (GO:0007167)	1/121	0.455751	0.525689	0	0	1.66498	1.30836	GFRA2
- Reg of Transmembrane Receptor Prot Serine/Threonine Kinase Sgnlng Pway (GO:0090101)	1/122	0.458489	0.527956	0	0	1.65114	1.28759	ASPN
Transcription Initiation at RNA Polymerase II Promoter (GO:0006367)	1/123	0.461213	0.528425	0	0	1.63752	1.26727	TAF4B
Cellular Response to Molecule of Bacterial Origin (GO:0071219)	1/123	0.461213	0.528425	0	0	1.63752	1.26727	SERPINE1
Response to Cytokine (GO:0034097)	1/123	0.461213	0.528425	0	0	1.63752	1.26727	BCL2L1
Cellular Response to Lipopolysaccharide (GO:0071222)	1/125	0.46662	0.533726	0	0	1.61095	1.22793	SERPINE1
Calcium Ion Transport (GO:0006816)	1/126	0.469304	0.534487	0	0	1.59798	1.20888	GRIN3A
Regulation of Cell Motility (GO:2000145)	1/126	0.469304	0.534487	0	0	1.59798	1.20888	SLK
Regulation of Apoptotic Process (GO:0042981)	4/704	0.469943	0.534487	0	0	1.14286	0.863022	EGR1;SLK;CTSD;BCL2L1
Protein Localization to Nucleus (GO:0034504)	1/127	0.471974	0.534487	0	0	1.58522	1.19023	APPL2
Regulation of Anatomical Structure Morphogenesis (GO:0022603)	1/127	0.471974	0.534487	0	0	1.58522	1.19023	CLASP1
Negative Regulation of MAPK Cascade (GO:0043409)	1/127	0.471974	0.534487	0	0	1.58522	1.19023	CNKSR3
Proteolysis (GO:0006508)	2/321	0.47874	0.540783	0	0	1.2527	0.922738	ACE;CTSD
Fatty Acid Metabolic Process (GO:0006631)	1/130	0.479906	0.540783	0	0	1.54812	1.13657	SLC27A6
Positive Regulation of Defense Response (GO:0031349)	1/130	0.479906	0.540783	0	0	1.54812	1.13657	SERPINE1
Epithelial Cell Differentiation (GO:0030855)	1/132	0.485128	0.544102	0	0	1.52433	1.10261	GLI1
Circulatory System Development (GO:0072359)	1/132	0.485128	0.544102	0	0	1.52433	1.10261	MICAL2
Positive Regulation of Cytokine Production (GO:0001819)	2/325	0.485237	0.544102	0	0	1.23694	0.894452	EGR1;SERPINE1
Regulation of GTPase Activity (GO:0043087)	1/134	0.490298	0.548877	0	0	1.50125	1.07001	GPSM1
Mitochondrion Organization (GO:0007005)	1/135	0.492863	0.550847	0	0	1.48997	1.05419	BCL2L1
Protein Targeting (GO:0006605)	1/136	0.495416	0.552797	0	0	1.47886	1.03869	ANKRD10
Negative Regulation of Transcription by RNA Polymerase II (GO:0000122)	4/732	0.500388	0.557435	0	0	1.0973	0.759739	CCND1;BHLHE41;NR1D2;RREB1
Regulation of Cytoskeleton Organization (GO:0051493)	1/139	0.502999	0.558525	0	0	1.44649	0.993983	CLASP1
Negative Regulation of Cell Motility (GO:2000146)	1/139	0.502999	0.558525	0	0	1.44649	0.993983	SERPINE1
Protein Autophosphorylation (GO:0046777)	1/140	0.505501	0.560394	0	0	1.43601	0.979656	SLK
Protein Homooligomerization (GO:0051260)	1/143	0.512934	0.567713	0	0	1.40546	0.938299	APPL2
Protein Modification Process (GO:0036211)	3/545	0.515349	0.569464	0	0	1.10461	0.732262	TRIB2;PTPN14;CLASP1
Protein Glycosylation (GO:0006486)	1/145	0.517827	0.57128	0	0	1.3858	0.912015	GALNT18
Negative Regulation of Wnt Signaling Pathway (GO:0030178)	1/146	0.520256	0.573035	0	0	1.37618	0.899241	GLI1
Axon Guidance (GO:0007411)	1/152	0.534574	0.58786	0	0	1.32109	0.827379	UNC5B
Negative Regulation of Response to External Stimulus (GO:0032102)	1/154	0.539253	0.592053	0	0	1.30369	0.805122	SERPINE1
Positive Regulation of MAPK Cascade (GO:0043410)	2/362	0.542916	0.59512	0	0	1.10771	0.676589	CD40;GDF6
Negative Regulation of Gene Expression (GO:0010629)	2/364	0.545906	0.597439	0	0	1.10148	0.666733	DDX3Y;STC2
Actin Filament Organization (GO:0007015)	1/158	0.54847	0.599286	0	0	1.27022	0.762923	ACTA1
Regulation of Cellular Component Organization (GO:0051128)	1/159	0.550745	0.600813	0	0	1.26211	0.75283	CHPT1
Response to Lipopolysaccharide (GO:0032496)	1/161	0.555263	0.604776	0	0	1.24621	0.733164	SERPINE1
+ Reg of Phosphatidylinositol 3-Kinase/Prot Kinase B Signal Transduction (GO:0051897)	1/162	0.557504	0.605535	0	0	1.23841	0.723584	UNC5B
Proteasomal Protein Catabolic Process (GO:0010498)	2/372	0.55773	0.605535	0	0	1.07722	0.628968	KLHL29;USP19
Positive Regulation of Response to External Stimulus (GO:0032103)	1/163	0.559735	0.606749	0	0	1.2307	0.714167	SERPINE1
Negative Regulation of Cell Population Proliferation (GO:0008285)	2/379	0.567898	0.614624	0	0	1.05684	0.597974	PTPN14;APPL2
Cellular Response to Nitrogen Compound (GO:1901699)	1/169	0.572886	0.619043	0	0	1.18639	0.660899	EGR1
Brain Development (GO:0007420)	1/170	0.57504	0.62039	0	0	1.17931	0.65253	CLASP1
Heart Development (GO:0007507)	1/171	0.577183	0.620744	0	0	1.17231	0.644298	MICAL2
Positive Regulation of Protein Phosphorylation (GO:0001934)	1/171	0.577183	0.620744	0	0	1.17231	0.644298	MAP2K3
Nitrogen Compound Transport (GO:0071705)	1/172	0.579315	0.622059	0	0	1.1654	0.6362	SLC6A6
Regulation of Neuron Projection Development (GO:0010975)	1/176	0.587739	0.630115	0	0	1.13853	0.605097	KIDINS220
Metal Ion Transport (GO:0030001)	1/180	0.595995	0.637966	0	0	1.11286	0.575931	GRIN3A
Neuron Differentiation (GO:0030182)	1/181	0.598033	0.639148	0	0	1.10662	0.568924	WNT5B
Extracellular Matrix Organization (GO:0030198)	1/182	0.600061	0.640315	0	0	1.10045	0.562026	POSTN
Positive Regulation of Cellular Process (GO:0048522)	3/622	0.605374	0.644977	0	0	0.96336	0.483519	CDK18;SLC6A6;GLI1
Macromolecule Biosynthetic Process (GO:0009059)	1/189	0.613978	0.653127	0	0	1.0591	0.516626	GTPBP2
Generation of Neurons (GO:0048699)	1/192	0.619794	0.658291	0	0	1.04231	0.498607	WNT5B
DNA Damage Response (GO:0006974)	2/421	0.625386	0.662319	0	0	0.948858	0.445381	CCND1;BCL2L1
Regulation of Programmed Cell Death (GO:0043067)	1/195	0.625524	0.662319	0	0	1.02603	0.48138	SLK
Response to Endoplasmic Reticulum Stress (GO:0034976)	1/196	0.627415	0.663295	0	0	1.02072	0.475806	USP19
Defense Response to Virus (GO:0051607)	1/198	0.631168	0.666233	0	0	1.01025	0.464902	BCL2L1
Positive Regulation of Intracellular Signal Transduction (GO:1902533)	3/652	0.637374	0.671747	0	0	0.917399	0.413195	CD40;UNC5B;GDF6
DNA-templated Transcription (GO:0006351)	1/203	0.640388	0.673885	0	0	0.984998	0.438995	RREB1
Positive Regulation of Canonical NF-kappaB Signal Transduction (GO:0043123)	1/204	0.642205	0.674759	0	0	0.980097	0.434034	CD40
Positive Regulation of Gene Expression (GO:0010628)	2/436	0.644452	0.676082	0	0	0.915358	0.402166	EGR1;ACTA1
Neuron Projection Development (GO:0031175)	1/206	0.64581	0.676469	0	0	0.970436	0.424322	GRM7
Protein Stabilization (GO:0050821)	1/212	0.656413	0.686524	0	0	0.942553	0.396782	USP19
Regulation of Canonical Wnt Signaling Pathway (GO:0060828)	1/216	0.663307	0.692675	0	0	0.92483	0.379659	GLI1
Negative Regulation of Cell Differentiation (GO:0045596)	1/220	0.670063	0.698663	0	0	0.907753	0.363449	TRIB2
Defense Response to Bacterium (GO:0042742)	1/221	0.671731	0.699337	0	0	0.903581	0.359532	SERPINE1
Regulation of Cell Growth (GO:0001558)	1/222	0.673391	0.699999	0	0	0.899447	0.355668	CHPT1
Negative Regulation of RNA Biosynthetic Process (GO:1902679)	2/470	0.684858	0.710255	0	0	0.847375	0.320769	BHLHE41;NR1D2
Cilium Organization (GO:0044782)	1/230	0.686373	0.710255	0	0	0.867672	0.326535	PCNT
Regulation of Autophagy (GO:0010506)	1/230	0.686373	0.710255	0	0	0.867672	0.326535	BCL2L1
Translation (GO:0006412)	1/232	0.689537	0.712453	0	0	0.860073	0.319718	GTPBP2
Regulation of Transcription by RNA Polymerase II (GO:0006357)	10/2250	0.700561	0.722751	0	0	0.875992	0.311742	EGR1;CD40;HLF;CCND1;TEF;BHLHE41;MICAL2;NR1D2;GLI1;RREB1
Cilium Assembly (GO:0060271)	1/247	0.712287	0.733741	0	0	0.807013	0.273799	PCNT
Inflammatory Response (GO:0006954)	1/261	0.732027	0.752942	0	0	0.763015	0.238013	CD40
Regulation of Canonical NF-kappaB Signal Transduction (GO:0043122)	1/270	0.744003	0.764111	0	0	0.737148	0.217982	CD40
Negative Regulation of DNA-templated Transcription (GO:0045892)	4/1006	0.747107	0.765884	0	0	0.785845	0.229111	CCND1;BHLHE41;NR1D2;RREB1
Negative Regulation of Cellular Process (GO:0048523)	2/531	0.747969	0.765884	0	0	0.747309	0.217014	PTPN14;APPL2
Plasma Membrane Bounded Cell Projection Assembly (GO:0120031)	1/277	0.75295	0.769832	0	0	0.718196	0.203793	PCNT
Regulation of DNA-templated Transcription (GO:0006355)	9/2139	0.755122	0.770901	0	0	0.825104	0.231752	MAP2K3;EGR1;HLF;TEF;BHLHE41;NR1D2;GDF6;GLI1;RREB1
Central Nervous System Development (GO:0007417)	1/288	0.766388	0.781236	0	0	0.690283	0.183662	CLASP1
Cellular Response to Cytokine Stimulus (GO:0071345)	1/289	0.767573	0.781279	0	0	0.687851	0.181952	EGR1
Cell Surface Receptor Protein Tyrosine Kinase Signaling Pathway (GO:0007169)	1/296	0.775704	0.788382	0	0	0.671289	0.170497	GFRA2
Regulation of Intracellular Signal Transduction (GO:1902531)	1/302	0.782448	0.794057	0	0	0.657707	0.161353	RRAS
Inorganic Cation Transmembrane Transport (GO:0098662)	1/307	0.787915	0.798421	0	0	0.646795	0.154173	SLC6A6
Protein Modification by Small Protein Conjugation (GO:0032446)	1/316	0.797415	0.806852	0	0	0.628026	0.142173	DCUN1D2
Intracellular Protein Transport (GO:0006886)	1/326	0.807477	0.815826	0	0	0.608392	0.130099	APPL2
Protein Metabolic Process (GO:0019538)	2/614	0.816368	0.823593	0	0	0.643191	0.130497	ACE;CTSD
Proteasome-Mediated Ubiquitin-Dependent Protein Catabolic Process (GO:0043161)	1/340	0.820737	0.826781	0	0	0.582849	0.115143	KLHL29
Organelle Assembly (GO:0070925)	1/346	0.82614	0.831	0	0	0.572537	0.109349	PCNT
Negative Regulation of Programmed Cell Death (GO:0043069)	1/382	0.85533	0.859098	0	0	0.517485	0.080866	BCL2L1
Ubiquitin-Dependent Protein Catabolic Process (GO:0006511)	1/455	0.900445	0.902797	0	0	0.432653	0.0453707	KLHL29
Regulation of Cell Population Proliferation (GO:0042127)	2/769	0.901477	0.902797	0	0	0.509087	0.0528029	GLI1;PTPN14
Positive Regulation of Cell Population Proliferation (GO:0008284)	1/484	0.914214	0.914214	0	0	0.406069	0.0364204	GLI1

## Sheet: Top100 HFD up
Term	Overlap	P-value	Adjusted P-value	Old P-value	Old Adjusted P-value	Odds Ratio	Combined Score	Genes
Translation (GO:0006412)	11/232	2.30965e-08	1.37193e-05	0	0	11.0056	193.518	MRPS26;MRPL40;MRPS22;DHPS;MRPS34;RPL36;IGF2BP3;AURKAIP1;RPL39;UBA52;MRPL55
Macromolecule Biosynthetic Process (GO:0009059)	8/189	4.85955e-06	0.00144329	0	0	9.47346	115.904	MRPL40;DHPS;MRPS34;RPL36;IGF2BP3;RPL39;UBA52;MRPL55
Gene Expression (GO:0010467)	10/381	2.1117e-05	0.00418117	0	0	5.84876	62.9644	NR4A2;MRPL40;DHPS;MRPS34;RPL36;IGF2BP3;AURKAIP1;RPL39;UBA52;MRPL55
Mitochondrial Translation (GO:0032543)	5/94	0.000109047	0.0161935	0	0	11.7156	106.89	MRPS26;MRPL40;MRPS22;MRPS34;MRPL55
Mitochondrial Gene Expression (GO:0140053)	5/100	0.000146074	0.0173535	0	0	10.9723	96.9008	MRPS26;MRPL40;MRPS22;MRPS34;MRPL55
Protein Metabolic Process (GO:0019538)	11/614	0.000249137	0.0246645	0	0	3.95526	32.8188	PSENEN;UBL5;MRPL40;DHPS;MRPS34;RPL36;IGF2BP3;AURKAIP1;RPL39;UBA52;MRPL55
Negative Regulation of Cardiac Muscle Cell Apoptotic Process (GO:0010667)	2/6	0.000366432	0.0310944	0	0	101.51	803.118	HAND2;NUPR1
Negative Regulation of Striated Muscle Cell Apoptotic Process (GO:0010664)	2/9	0.000870867	0.0574772	0	0	57.9971	408.649	HAND2;NUPR1
Modification-Dependent Macromolecule Catabolic Process (GO:0043632)	2/9	0.000870867	0.0574772	0	0	57.9971	408.649	UBB;UBA52
Regulation of Cardiac Muscle Cell Apoptotic Process (GO:0010665)	2/11	0.00132184	0.0785173	0	0	45.1043	298.984	HAND2;NUPR1
Polyamine Metabolic Process (GO:0006595)	2/12	0.00158105	0.0853764	0	0	40.5918	261.804	DHPS;SAT2
Positive Regulation of Cellular Respiration (GO:1901857)	2/13	0.00186243	0.0921902	0	0	36.8998	231.948	NUPR1;ISCU
Positive Regulation of p38MAPK Cascade (GO:1900745)	2/22	0.0053565	0.244751	0	0	20.2857	106.083	HAND2;GADD45G
Regulation of Apoptotic Process (GO:0042981)	9/704	0.00870146	0.295145	0	0	2.73294	12.9658	PYCARD;SOCS3;LGALS1;EGR3;UBB;HTR2B;NUPR1;IER3;GADD45G
Mitochondrial Electron Transport, NADH to Ubiquinone (GO:0006120)	2/34	0.0125125	0.295145	0	0	12.6709	55.5117	NDUFA6;NDUFC1
NADH Dehydrogenase Complex Assembly (GO:0010257)	2/35	0.013228	0.295145	0	0	12.2863	53.1436	NDUFA6;NDUFAF7
Regulation of p38MAPK Cascade (GO:1900744)	2/35	0.013228	0.295145	0	0	12.2863	53.1436	HAND2;GADD45G
Mitochondrial Respiratory Chain Complex I Assembly (GO:0032981)	2/35	0.013228	0.295145	0	0	12.2863	53.1436	NDUFA6;NDUFAF7
Cytoplasmic Translation (GO:0002181)	3/101	0.0141941	0.295145	0	0	6.24932	26.5904	RPL36;RPL39;UBA52
Glutathione Metabolic Process (GO:0006749)	2/38	0.0154783	0.295145	0	0	11.2608	46.9384	HPGDS;CHAC2
Calcium Ion Homeostasis (GO:0055074)	3/105	0.0157404	0.295145	0	0	6.00303	24.9217	CCL7;HTR2B;SLC24A5
Positive Regulation of Intrinsic Apoptotic Signaling Pathway (GO:2001244)	2/39	0.0162624	0.295145	0	0	10.9559	45.1261	UBB;NUPR1
Regulation of Apoptotic Signaling Pathway (GO:2001233)	2/40	0.0170632	0.295145	0	0	10.667	43.4237	PYCARD;NR4A2
Positive Regulation of Inflammatory Response (GO:0050729)	3/115	0.0200067	0.295145	0	0	5.46429	21.3746	PYCARD;LGALS1;NUPR1
Intracellular Monoatomic Cation Homeostasis (GO:0030003)	4/210	0.0211918	0.295145	0	0	3.98341	15.3526	CCL7;HTR2B;SLC24A5;ISCU
Regulation of Intrinsic Apoptotic Signaling Pathway (GO:2001242)	2/46	0.022208	0.295145	0	0	9.20965	35.0639	PYCARD;NUPR1
Negative Regulation of DNA-binding Transcription Factor Activity (GO:0043433)	3/122	0.0233356	0.295145	0	0	5.14104	19.3189	PYCARD;LRRC14;NUPR1
Positive Regulation of Intrinsic Apoptotic Signaling Pathway by P53 Class Mediator (GO:1902255)	1/5	0.0247535	0.295145	0	0	50.2424	185.836	UBB
Galactolipid Biosynthetic Process (GO:0019375)	1/5	0.0247535	0.295145	0	0	50.2424	185.836	B3GALT2
Galactosylceramide Biosynthetic Process (GO:0006682)	1/5	0.0247535	0.295145	0	0	50.2424	185.836	B3GALT2
Glutathione Catabolic Process (GO:0006751)	1/5	0.0247535	0.295145	0	0	50.2424	185.836	CHAC2
Negative Regulation of T-helper 17 Cell Lineage Commitment (GO:2000329)	1/5	0.0247535	0.295145	0	0	50.2424	185.836	LGALS1
Negative Regulation of Cell Fate Commitment (GO:0010454)	1/5	0.0247535	0.295145	0	0	50.2424	185.836	LGALS1
Striated Muscle Hypertrophy (GO:0014897)	1/5	0.0247535	0.295145	0	0	50.2424	185.836	HTR2B
Proton Motive Force-Driven Mitochondrial ATP Synthesis (GO:0042776)	2/52	0.0279086	0.295145	0	0	8.10204	28.9958	NDUFA6;NDUFC1
Negative Regulation of Delayed Rectifier Potassium Channel Activity (GO:1902260)	1/6	0.029631	0.295145	0	0	40.1919	141.433	KCNRG
Glutathione Biosynthetic Process (GO:0006750)	1/6	0.029631	0.295145	0	0	40.1919	141.433	CHAC2
Glycosylceramide Biosynthetic Process (GO:0046476)	1/6	0.029631	0.295145	0	0	40.1919	141.433	B3GALT2
Regulation of Natural Killer Cell Chemotaxis (GO:2000501)	1/6	0.029631	0.295145	0	0	40.1919	141.433	CCL7
Noradrenergic Neuron Differentiation (GO:0003357)	1/6	0.029631	0.295145	0	0	40.1919	141.433	HAND2
Regulation of Type B Pancreatic Cell Proliferation (GO:0061469)	1/6	0.029631	0.295145	0	0	40.1919	141.433	NUPR1
Polyamine Biosynthetic Process (GO:0006596)	1/6	0.029631	0.295145	0	0	40.1919	141.433	SAT2
Negative Regulation of Apoptotic Process (GO:0043066)	6/475	0.0319772	0.295145	0	0	2.64451	9.10435	NR4A2;SOCS3;EGR3;HTR2B;NUPR1;IER3
Regulation of Proteasomal Protein Catabolic Process (GO:0061136)	2/56	0.0319994	0.295145	0	0	7.50038	25.8166	UBB;NUPR1
Intracellular Calcium Ion Homeostasis (GO:0006874)	3/140	0.033191	0.295145	0	0	4.46151	15.1936	CCL7;HTR2B;SLC24A5
Mesenchymal Cell Differentiation (GO:0048762)	2/58	0.034128	0.295145	0	0	7.23178	24.4263	HTR2B;AMELX
Establishment of Mitochondrion Localization, Microtubule-Mediated (GO:0034643)	1/7	0.0344842	0.295145	0	0	33.4916	112.775	UBB
Positive Regulation of Leukocyte Differentiation (GO:1902107)	1/7	0.0344842	0.295145	0	0	33.4916	112.775	LGALS1
Galactosylceramide Metabolic Process (GO:0006681)	1/7	0.0344842	0.295145	0	0	33.4916	112.775	B3GALT2
Notch Receptor Processing (GO:0007220)	1/7	0.0344842	0.295145	0	0	33.4916	112.775	PSENEN
Positive Regulation of Phospholipid Biosynthetic Process (GO:0071073)	1/7	0.0344842	0.295145	0	0	33.4916	112.775	HTR2B
Neuron Projection Arborization (GO:0140058)	1/7	0.0344842	0.295145	0	0	33.4916	112.775	SSNA1
Nonribosomal Peptide Biosynthetic Process (GO:0019184)	1/7	0.0344842	0.295145	0	0	33.4916	112.775	CHAC2
Osmosensory Signaling Pathway (GO:0007231)	1/7	0.0344842	0.295145	0	0	33.4916	112.775	PYCARD
Cardiac Muscle Hypertrophy (GO:0003300)	1/7	0.0344842	0.295145	0	0	33.4916	112.775	HTR2B
Macropinocytosis (GO:0044351)	1/7	0.0344842	0.295145	0	0	33.4916	112.775	PYCARD
Meiotic DNA Double-Strand Break Formation (GO:0042138)	1/7	0.0344842	0.295145	0	0	33.4916	112.775	REC114
Proton Motive Force-Driven ATP Synthesis (GO:0015986)	2/59	0.0352126	0.295145	0	0	7.10455	23.7743	NDUFA6;NDUFC1
Oxidative Phosphorylation (GO:0006119)	2/60	0.0363104	0.295145	0	0	6.9817	23.1489	NDUFA6;NDUFC1
Protein Targeting to Mitochondrion (GO:0006626)	2/60	0.0363104	0.295145	0	0	6.9817	23.1489	TIMM10B;AURKAIP1
Synaptic Vesicle Fusion to Presynaptic Active Zone Membrane (GO:0031629)	1/8	0.0393135	0.295145	0	0	28.7056	92.8968	STX19
Epigenetic Programming in the Zygotic Pronuclei (GO:0044725)	1/8	0.0393135	0.295145	0	0	28.7056	92.8968	METTL23
Regulation of Endothelial Cell Differentiation (GO:0045601)	1/8	0.0393135	0.295145	0	0	28.7056	92.8968	TMEM100
Regulation of Epithelial Cell Apoptotic Process (GO:1904035)	1/8	0.0393135	0.295145	0	0	28.7056	92.8968	NUPR1
Regulation of Intrinsic Apoptotic Signaling Pathway by P53 Class Mediator (GO:1902253)	1/8	0.0393135	0.295145	0	0	28.7056	92.8968	UBB
Adult Heart Development (GO:0007512)	1/8	0.0393135	0.295145	0	0	28.7056	92.8968	HAND2
Positive Regulation of Adaptive Immune Response (GO:0002821)	1/8	0.0393135	0.295145	0	0	28.7056	92.8968	PYCARD
Negative Regulation of DNA-templated DNA Replication (GO:2000104)	1/8	0.0393135	0.295145	0	0	28.7056	92.8968	DYNLL1
Spermidine Metabolic Process (GO:0008216)	1/8	0.0393135	0.295145	0	0	28.7056	92.8968	SAT2
Positive Regulation of Endopeptidase Activity (GO:0010950)	1/8	0.0393135	0.295145	0	0	28.7056	92.8968	PSENEN
Aerobic Electron Transport Chain (GO:0019646)	2/64	0.0408313	0.295145	0	0	6.52995	20.8848	NDUFA6;NDUFC1
Positive Regulation of ERK1 and ERK2 Cascade (GO:0070374)	3/153	0.0414557	0.295145	0	0	4.07216	12.9622	PYCARD;HAND2;HTR2B
Mitochondrial ATP Synthesis Coupled Electron Transport (GO:0042775)	2/65	0.0419931	0.295145	0	0	6.42598	20.372	NDUFA6;NDUFC1
Negative Regulation of NF-kappaB Transcription Factor Activity (GO:0032088)	2/65	0.0419931	0.295145	0	0	6.42598	20.372	PYCARD;LRRC14
Negative Regulation of Programmed Cell Death (GO:0043069)	5/382	0.0428214	0.295145	0	0	2.72553	8.58739	SOCS3;EGR3;HTR2B;NUPR1;IER3
Endothelial Cell Chemotaxis (GO:0035767)	1/9	0.0441188	0.295145	0	0	25.1162	78.3842	EGR3
Regulation of Delayed Rectifier Potassium Channel Activity (GO:1902259)	1/9	0.0441188	0.295145	0	0	25.1162	78.3842	KCNRG
Vasoconstriction (GO:0042310)	1/9	0.0441188	0.295145	0	0	25.1162	78.3842	HTR2B
T-helper 17 Cell Lineage Commitment (GO:0072540)	1/9	0.0441188	0.295145	0	0	25.1162	78.3842	SOCS3
[2Fe-2S] Cluster Assembly (GO:0044571)	1/9	0.0441188	0.295145	0	0	25.1162	78.3842	ISCU
Amyloid-Beta Formation (GO:0034205)	1/9	0.0441188	0.295145	0	0	25.1162	78.3842	PSENEN
Negative Regulation of Voltage-Gated Potassium Channel Activity (GO:1903817)	1/9	0.0441188	0.295145	0	0	25.1162	78.3842	KCNRG
Positive Regulation of Vasculogenesis (GO:2001214)	1/9	0.0441188	0.295145	0	0	25.1162	78.3842	TMEM100
Embryonic Eye Morphogenesis (GO:0048048)	1/9	0.0441188	0.295145	0	0	25.1162	78.3842	MFAP2
Protein Maturation (GO:0051604)	3/158	0.0448856	0.295145	0	0	3.93981	12.2277	PSENEN;DHPS;AURKAIP1
Positive Regulation of Apoptotic Signaling Pathway (GO:2001235)	2/70	0.0479848	0.295145	0	0	5.95198	18.0754	PYCARD;NUPR1
Positive Regulation of Endothelial Cell Proliferation (GO:0001938)	2/70	0.0479848	0.295145	0	0	5.95198	18.0754	EGR3;HTR2B
CRD-mediated mRNA Stabilization (GO:0070934)	1/10	0.0489004	0.295145	0	0	22.3244	67.3742	IGF2BP3
Negative Regulation of Interferon-Beta Production (GO:0032688)	1/10	0.0489004	0.295145	0	0	22.3244	67.3742	PYCARD
T-helper 17 Cell Differentiation (GO:0072539)	1/10	0.0489004	0.295145	0	0	22.3244	67.3742	SOCS3
Negative Regulation of Programmed Necrotic Cell Death (GO:0062099)	1/10	0.0489004	0.295145	0	0	22.3244	67.3742	NUPR1
Biogenic Amine Biosynthetic Process (GO:0042401)	1/10	0.0489004	0.295145	0	0	22.3244	67.3742	SAT2
Biomineral Tissue Development (GO:0031214)	1/10	0.0489004	0.295145	0	0	22.3244	67.3742	AMELX
Pinocytosis (GO:0006907)	1/10	0.0489004	0.295145	0	0	22.3244	67.3742	PYCARD
Negative Regulation of T-helper 17 Cell Differentiation (GO:2000320)	1/10	0.0489004	0.295145	0	0	22.3244	67.3742	LGALS1
Negative Regulation of Autophagosome Assembly (GO:1902902)	1/10	0.0489004	0.295145	0	0	22.3244	67.3742	NUPR1
Regulation of Ceramide Biosynthetic Process (GO:2000303)	1/10	0.0489004	0.295145	0	0	22.3244	67.3742	ORMDL2
Regulation of Dendritic Cell Differentiation (GO:2001198)	1/11	0.0536583	0.295145	0	0	20.0909	58.7683	LGALS1
Negative Regulation of Epithelial Cell Apoptotic Process (GO:1904036)	1/11	0.0536583	0.295145	0	0	20.0909	58.7683	NUPR1
Negative Regulation of Glycolytic Process (GO:0045820)	1/11	0.0536583	0.295145	0	0	20.0909	58.7683	NUPR1
Excitatory Synapse Assembly (GO:1904861)	1/11	0.0536583	0.295145	0	0	20.0909	58.7683	LRRC4
Positive Regulation of Peptidase Activity (GO:0010952)	1/11	0.0536583	0.295145	0	0	20.0909	58.7683	PSENEN
Negative Regulation of Purine Nucleotide Catabolic Process (GO:0033122)	1/11	0.0536583	0.295145	0	0	20.0909	58.7683	NUPR1
Regulation of Programmed Necrotic Cell Death (GO:0062098)	1/11	0.0536583	0.295145	0	0	20.0909	58.7683	NUPR1
Phasic Smooth Muscle Contraction (GO:0014821)	1/11	0.0536583	0.295145	0	0	20.0909	58.7683	HTR2B
Cell Chemotaxis (GO:0060326)	2/78	0.0581682	0.295145	0	0	5.32331	15.1417	EGR3;CCR9
tRNA 5'-Leader Removal (GO:0001682)	1/12	0.0583926	0.295145	0	0	18.2635	51.8788	RPP21
Negative Regulation of Locomotion (GO:0040013)	1/12	0.0583926	0.295145	0	0	18.2635	51.8788	FRMD5
Positive Regulation of Neuroinflammatory Response (GO:0150078)	1/12	0.0583926	0.295145	0	0	18.2635	51.8788	NUPR1
T-helper Cell Lineage Commitment (GO:0002295)	1/12	0.0583926	0.295145	0	0	18.2635	51.8788	SOCS3
Protein Insertion Into Mitochondrial Inner Membrane (GO:0045039)	1/12	0.0583926	0.295145	0	0	18.2635	51.8788	TIMM10B
Phospholipid Homeostasis (GO:0055091)	1/12	0.0583926	0.295145	0	0	18.2635	51.8788	ANGPTL3
Midbrain Dopaminergic Neuron Differentiation (GO:1904948)	1/12	0.0583926	0.295145	0	0	18.2635	51.8788	NR4A2
Proteolysis Involved in Protein Catabolic Process (GO:0051603)	2/80	0.0608217	0.295145	0	0	5.18629	14.5206	UBB;UBA52
Aerobic Respiration (GO:0009060)	2/81	0.0621639	0.295145	0	0	5.12038	14.2243	NDUFA6;NDUFC1
Positive Regulation of JNK Cascade (GO:0046330)	2/81	0.0621639	0.295145	0	0	5.12038	14.2243	PYCARD;GADD45G
Synaptic Vesicle Membrane Organization (GO:0048499)	1/13	0.0631034	0.295145	0	0	16.7407	46.2543	STX19
Epigenetic Programming of Gene Expression (GO:0043045)	1/13	0.0631034	0.295145	0	0	16.7407	46.2543	METTL23
Intraciliary Retrograde Transport (GO:0035721)	1/13	0.0631034	0.295145	0	0	16.7407	46.2543	DYNLL1
Positive Regulation of Viral Entry Into Host Cell (GO:0046598)	1/13	0.0631034	0.295145	0	0	16.7407	46.2543	LGALS1
Regulation of Sensory Perception (GO:0051931)	1/13	0.0631034	0.295145	0	0	16.7407	46.2543	TMEM100
Membrane Protein Intracellular Domain Proteolysis (GO:0031293)	1/13	0.0631034	0.295145	0	0	16.7407	46.2543	PSENEN
Regulation of Vasculogenesis (GO:2001212)	1/13	0.0631034	0.295145	0	0	16.7407	46.2543	TMEM100
Positive Regulation by Symbiont of Entry Into Host (GO:0075294)	1/13	0.0631034	0.295145	0	0	16.7407	46.2543	LGALS1
Modified Amino Acid Biosynthetic Process (GO:0042398)	1/13	0.0631034	0.295145	0	0	16.7407	46.2543	CHAC2
Regulation of T-helper 17 Cell Lineage Commitment (GO:2000328)	1/13	0.0631034	0.295145	0	0	16.7407	46.2543	LGALS1
Myeloid Dendritic Cell Activation (GO:0001773)	1/13	0.0631034	0.295145	0	0	16.7407	46.2543	PYCARD
Macromolecule Modification (GO:0043412)	2/84	0.0662504	0.29828	0	0	4.9323	13.3878	UBL5;UBA52
Cellular Respiration (GO:0045333)	2/85	0.0676322	0.29828	0	0	4.87263	13.1253	NDUFA6;NDUFC1
tRNA 5'-End Processing (GO:0099116)	1/14	0.0677909	0.29828	0	0	15.4522	41.587	RPP21
Thymus Development (GO:0048538)	1/14	0.0677909	0.29828	0	0	15.4522	41.587	HAND2
G Protein-Coupled Serotonin Receptor Signaling Pathway (GO:0098664)	1/14	0.0677909	0.29828	0	0	15.4522	41.587	HTR2B
Negative Regulation of Toll-Like Receptor Signaling Pathway (GO:0034122)	1/14	0.0677909	0.29828	0	0	15.4522	41.587	LRRC14
Cotranslational Protein Targeting to Membrane (GO:0006613)	1/14	0.0677909	0.29828	0	0	15.4522	41.587	SRP14
Negative Regulation of ATP Metabolic Process (GO:1903579)	1/14	0.0677909	0.29828	0	0	15.4522	41.587	NUPR1
Integrin-Mediated Signaling Pathway (GO:0007229)	2/86	0.0690235	0.298878	0	0	4.81438	12.8703	ANGPTL3;PRAM1
Synapse Assembly (GO:0007416)	2/87	0.0704243	0.298878	0	0	4.7575	12.6227	LGI2;LRRC4
Regulation of Endothelial Cell Proliferation (GO:0001936)	2/87	0.0704243	0.298878	0	0	4.7575	12.6227	EGR3;HTR2B
Positive Regulation of Apoptotic Process (GO:0043065)	4/313	0.0720651	0.298878	0	0	2.64172	6.94821	PYCARD;LGALS1;NUPR1;GADD45G
Amyloid Precursor Protein Catabolic Process (GO:0042987)	1/15	0.0724552	0.298878	0	0	14.3478	37.6598	PSENEN
Amyloid-Beta Metabolic Process (GO:0050435)	1/15	0.0724552	0.298878	0	0	14.3478	37.6598	PSENEN
Regulation of Oxidative Phosphorylation (GO:0002082)	1/15	0.0724552	0.298878	0	0	14.3478	37.6598	NUPR1
Regulation of Response to Endoplasmic Reticulum Stress (GO:1905897)	1/15	0.0724552	0.298878	0	0	14.3478	37.6598	NUPR1
Regulation of Sensory Perception of Pain (GO:0051930)	1/15	0.0724552	0.298878	0	0	14.3478	37.6598	TMEM100
Mitochondrial Respiratory Chain Complex Assembly (GO:0033108)	2/90	0.0746819	0.301481	0	0	4.59462	11.9208	NDUFA6;NDUFAF7
Calcium-Mediated Signaling (GO:0019722)	2/91	0.0761192	0.301481	0	0	4.54277	11.6997	HTR2B;CCR9
Establishment of Protein Localization to Endoplasmic Reticulum (GO:0072599)	1/16	0.0770964	0.301481	0	0	13.3906	34.316	SRP14
Positive Regulation of Lymphocyte Chemotaxis (GO:0140131)	1/16	0.0770964	0.301481	0	0	13.3906	34.316	CCL7
Postsynaptic Membrane Organization (GO:0001941)	1/16	0.0770964	0.301481	0	0	13.3906	34.316	LRRC4
Mitochondrion Transport Along Microtubule (GO:0047497)	1/16	0.0770964	0.301481	0	0	13.3906	34.316	UBB
Synaptic Membrane Adhesion (GO:0099560)	1/17	0.0817146	0.301481	0	0	12.553	31.4393	LRRC4
DNA Biosynthetic Process (GO:0071897)	1/17	0.0817146	0.301481	0	0	12.553	31.4393	POLD4
Negative Regulation of Receptor Signaling Pathway via JAK-STAT (GO:0046426)	1/17	0.0817146	0.301481	0	0	12.553	31.4393	SOCS3
Negative Regulation of Receptor Signaling Pathway via STAT (GO:1904893)	1/17	0.0817146	0.301481	0	0	12.553	31.4393	SOCS3
Innate Immune Response-Activating Signaling Pathway (GO:0002758)	1/17	0.0817146	0.301481	0	0	12.553	31.4393	PYCARD
Positive Regulation of Transcription Regulatory Region DNA Binding (GO:2000679)	1/17	0.0817146	0.301481	0	0	12.553	31.4393	HAND2
Carboxylic Acid Biosynthetic Process (GO:0046394)	1/17	0.0817146	0.301481	0	0	12.553	31.4393	PYCARD
Organophosphate Catabolic Process (GO:0046434)	1/17	0.0817146	0.301481	0	0	12.553	31.4393	ANGPTL3
Modified Amino Acid Catabolic Process (GO:0042219)	1/17	0.0817146	0.301481	0	0	12.553	31.4393	CHAC2
Motile Cilium Assembly (GO:0044458)	1/17	0.0817146	0.301481	0	0	12.553	31.4393	DYNLL1
Myeloid Cell Activation Involved in Immune Response (GO:0002275)	1/17	0.0817146	0.301481	0	0	12.553	31.4393	PYCARD
Positive Regulation of Canonical NF-kappaB Signal Transduction (GO:0043123)	3/204	0.0826056	0.302887	0	0	3.03108	7.55854	PYCARD;LGALS1;HTR2B
Positive Regulation of Lymphocyte Migration (GO:2000403)	1/18	0.08631	0.305167	0	0	11.814	28.9421	PYCARD
Positive Regulation of Muscle Hypertrophy (GO:0014742)	1/18	0.08631	0.305167	0	0	11.814	28.9421	HAND2
Amyloid Precursor Protein Metabolic Process (GO:0042982)	1/18	0.08631	0.305167	0	0	11.814	28.9421	PSENEN
Neural Crest Cell Differentiation (GO:0014033)	1/18	0.08631	0.305167	0	0	11.814	28.9421	HTR2B
Regulation of Viral Entry Into Host Cell (GO:0046596)	1/18	0.08631	0.305167	0	0	11.814	28.9421	LGALS1
Regulation of Adaptive Immune Response (GO:0002819)	1/18	0.08631	0.305167	0	0	11.814	28.9421	PYCARD
Positive Regulation of Cold-Induced Thermogenesis (GO:0120162)	2/99	0.0879246	0.306705	0	0	4.16642	10.1297	MFAP2;GADD45G
Eosinophil Chemotaxis (GO:0048245)	1/19	0.0908825	0.306705	0	0	11.1571	26.7569	CCL7
Eosinophil Migration (GO:0072677)	1/19	0.0908825	0.306705	0	0	11.1571	26.7569	CCL7
cGMP-mediated Signaling (GO:0019934)	1/19	0.0908825	0.306705	0	0	11.1571	26.7569	HTR2B
Regulation of Tissue Remodeling (GO:0034103)	1/19	0.0908825	0.306705	0	0	11.1571	26.7569	HAND2
Response to Fibroblast Growth Factor (GO:0071774)	1/19	0.0908825	0.306705	0	0	11.1571	26.7569	EGR3
Positive Regulation of Activated T Cell Proliferation (GO:0042104)	1/19	0.0908825	0.306705	0	0	11.1571	26.7569	PYCARD
Regulation of Behavior (GO:0050795)	1/19	0.0908825	0.306705	0	0	11.1571	26.7569	HTR2B
Regulation of Endopeptidase Activity (GO:0052548)	1/20	0.0954324	0.306705	0	0	10.5694	24.831	PSENEN
Negative Regulation of Phosphate Metabolic Process (GO:0045936)	1/20	0.0954324	0.306705	0	0	10.5694	24.831	DYNLL1
Positive Regulation of Release of Cytochrome C From Mitochondria (GO:0090200)	1/20	0.0954324	0.306705	0	0	10.5694	24.831	PYCARD
Oogenesis (GO:0048477)	1/20	0.0954324	0.306705	0	0	10.5694	24.831	REC114
Positive Regulation of Cardiac Muscle Hypertrophy (GO:0010613)	1/20	0.0954324	0.306705	0	0	10.5694	24.831	HAND2
Entrainment of Circadian Clock by Photoperiod (GO:0043153)	1/21	0.0999598	0.306705	0	0	10.0404	23.1229	RBM4B
Positive Regulation of Lipid Catabolic Process (GO:0050996)	1/21	0.0999598	0.306705	0	0	10.0404	23.1229	ANGPTL3
Inhibitory Synapse Assembly (GO:1904862)	1/21	0.0999598	0.306705	0	0	10.0404	23.1229	LGI2
Innate Immune Response in Mucosa (GO:0002227)	1/21	0.0999598	0.306705	0	0	10.0404	23.1229	RPL39
Regulation of Neuroinflammatory Response (GO:0150077)	1/21	0.0999598	0.306705	0	0	10.0404	23.1229	NUPR1
Intrinsic Apoptotic Signaling Pathway in Response to DNA Damage by P53 Class Mediator (GO:0042771)	1/21	0.0999598	0.306705	0	0	10.0404	23.1229	PYCARD
Axon Extension (GO:0048675)	1/21	0.0999598	0.306705	0	0	10.0404	23.1229	SSNA1
Regulation of Transcription Regulatory Region DNA Binding (GO:2000677)	1/21	0.0999598	0.306705	0	0	10.0404	23.1229	HAND2
Response to BMP (GO:0071772)	1/21	0.0999598	0.306705	0	0	10.0404	23.1229	TMEM100
Negative Regulation of Amide Metabolic Process (GO:0034249)	1/21	0.0999598	0.306705	0	0	10.0404	23.1229	ORMDL2
Cell-Matrix Adhesion (GO:0007160)	2/107	0.100234	0.306705	0	0	3.84742	8.85004	TIMM10B;ANGPTL3
Regulation of ERK1 and ERK2 Cascade (GO:0070372)	3/223	0.101148	0.306705	0	0	2.76664	6.33883	PYCARD;HAND2;HTR2B
ERK1 and ERK2 Cascade (GO:0070371)	1/22	0.104465	0.306705	0	0	9.56181	21.5992	HTR2B
Oligosaccharide Biosynthetic Process (GO:0009312)	1/22	0.104465	0.306705	0	0	9.56181	21.5992	B3GALT2
Cell Migration Involved in Sprouting Angiogenesis (GO:0002042)	1/22	0.104465	0.306705	0	0	9.56181	21.5992	EGR3
Membrane Protein Ectodomain Proteolysis (GO:0006509)	1/22	0.104465	0.306705	0	0	9.56181	21.5992	PSENEN
Photoperiodism (GO:0009648)	1/22	0.104465	0.306705	0	0	9.56181	21.5992	RBM4B
Positive Regulation of Epithelial Cell Differentiation (GO:0030858)	1/22	0.104465	0.306705	0	0	9.56181	21.5992	TMEM100
Positive Regulation of MAPK Cascade (GO:0043410)	4/362	0.108063	0.306705	0	0	2.27444	5.06073	PYCARD;HAND2;HTR2B;GADD45G
Eye Morphogenesis (GO:0048592)	1/23	0.108947	0.306705	0	0	9.12672	20.2329	MFAP2
Positive Regulation of mRNA Splicing, via Spliceosome (GO:0048026)	1/23	0.108947	0.306705	0	0	9.12672	20.2329	RBMXL1
Regulation of Neurotransmitter Receptor Activity (GO:0099601)	1/23	0.108947	0.306705	0	0	9.12672	20.2329	LYNX1
Artery Development (GO:0060840)	1/23	0.108947	0.306705	0	0	9.12672	20.2329	ANGPTL3
Iron-Sulfur Cluster Assembly (GO:0016226)	1/23	0.108947	0.306705	0	0	9.12672	20.2329	ISCU
Positive Regulation of Viral Life Cycle (GO:1903902)	1/23	0.108947	0.306705	0	0	9.12672	20.2329	LGALS1
Prostanoid Metabolic Process (GO:0006692)	1/23	0.108947	0.306705	0	0	9.12672	20.2329	HPGDS
Protein K63-linked Deubiquitination (GO:0070536)	1/23	0.108947	0.306705	0	0	9.12672	20.2329	OTUD1
Protein Targeting to ER (GO:0045047)	1/23	0.108947	0.306705	0	0	9.12672	20.2329	SRP14
Metallo-Sulfur Cluster Assembly (GO:0031163)	1/23	0.108947	0.306705	0	0	9.12672	20.2329	ISCU
Monocyte Chemotaxis (GO:0002548)	1/23	0.108947	0.306705	0	0	9.12672	20.2329	CCL7
Regulation of JNK Cascade (GO:0046328)	2/115	0.11299	0.313034	0	0	3.5736	7.79207	PYCARD;GADD45G
Cellular Response to Acetylcholine (GO:1905145)	1/24	0.113408	0.313034	0	0	8.72947	19.002	LYNX1
Mismatch Repair (GO:0006298)	1/24	0.113408	0.313034	0	0	8.72947	19.002	RNASEH2C
Antimicrobial Humoral Immune Response Mediated by Antimicrobial Peptide (GO:0061844)	2/116	0.114613	0.313034	0	0	3.54207	7.6728	CCL7;RPL39
Icosanoid Biosynthetic Process (GO:0046456)	1/25	0.117846	0.313034	0	0	8.36532	17.8882	PYCARD
Regulation of Toll-Like Receptor Signaling Pathway (GO:0034121)	1/25	0.117846	0.313034	0	0	8.36532	17.8882	LRRC14
Dopaminergic Neuron Differentiation (GO:0071542)	1/25	0.117846	0.313034	0	0	8.36532	17.8882	NR4A2
Regulation of Cardiac Muscle Hypertrophy (GO:0010611)	1/25	0.117846	0.313034	0	0	8.36532	17.8882	HAND2
Sulfur Compound Catabolic Process (GO:0044273)	1/25	0.117846	0.313034	0	0	8.36532	17.8882	CHAC2
Positive Regulation of Epithelial Cell Proliferation (GO:0050679)	2/118	0.117878	0.313034	0	0	3.48065	7.442	EGR3;HTR2B
tRNA Metabolic Process (GO:0006399)	1/26	0.122262	0.313034	0	0	8.0303	16.8764	RPP21
GPI Anchor Biosynthetic Process (GO:0006506)	1/26	0.122262	0.313034	0	0	8.0303	16.8764	PIGF
GPI Anchor Metabolic Process (GO:0006505)	1/26	0.122262	0.313034	0	0	8.0303	16.8764	PIGF
Positive Regulation of mRNA Processing (GO:0050685)	1/26	0.122262	0.313034	0	0	8.0303	16.8764	RBMXL1
Negative Regulation of Macroautophagy (GO:0016242)	1/26	0.122262	0.313034	0	0	8.0303	16.8764	NUPR1
Regulation of Lipid Catabolic Process (GO:0050994)	1/26	0.122262	0.313034	0	0	8.0303	16.8764	ANGPTL3
Acylglycerol Homeostasis (GO:0055090)	1/26	0.122262	0.313034	0	0	8.0303	16.8764	ANGPTL3
Blood Vessel Endothelial Cell Migration (GO:0043534)	1/26	0.122262	0.313034	0	0	8.0303	16.8764	EGR3
Microtubule Nucleation (GO:0007020)	1/26	0.122262	0.313034	0	0	8.0303	16.8764	SSNA1
Positive Regulation of T Cell Migration (GO:2000406)	1/26	0.122262	0.313034	0	0	8.0303	16.8764	PYCARD
Regulation of T Cell Migration (GO:2000404)	1/26	0.122262	0.313034	0	0	8.0303	16.8764	PYCARD
DNA Synthesis Involved in DNA Repair (GO:0000731)	1/27	0.126657	0.318788	0	0	7.72106	15.9538	POLD4
Positive Regulation of Lipid Metabolic Process (GO:0045834)	1/27	0.126657	0.318788	0	0	7.72106	15.9538	ANGPTL3
Regulation of Proteolysis Involved in Protein Catabolic Process (GO:1903050)	1/27	0.126657	0.318788	0	0	7.72106	15.9538	UBB
Positive Regulation of DNA Binding (GO:0043388)	1/27	0.126657	0.318788	0	0	7.72106	15.9538	HAND2
Positive Regulation of Programmed Cell Death (GO:0043068)	3/248	0.127807	0.319304	0	0	2.48117	5.10435	PYCARD;LGALS1;GADD45G
Establishment of Protein Localization to Mitochondrial Membrane (GO:0090151)	1/28	0.131029	0.319304	0	0	7.43472	15.1098	TIMM10B
Regulation of Monoatomic Ion Transport (GO:0043269)	1/28	0.131029	0.319304	0	0	7.43472	15.1098	KCNJ13
Positive Regulation of Signal Transduction by P53 Class Mediator (GO:1901798)	1/28	0.131029	0.319304	0	0	7.43472	15.1098	UBB
Carbohydrate Biosynthetic Process (GO:0016051)	1/28	0.131029	0.319304	0	0	7.43472	15.1098	B3GALT2
Phospholipid Catabolic Process (GO:0009395)	1/28	0.131029	0.319304	0	0	7.43472	15.1098	ANGPTL3
Mucosal Immune Response (GO:0002385)	1/28	0.131029	0.319304	0	0	7.43472	15.1098	RPL39
Regulation of Cell Motility (GO:2000145)	2/126	0.131162	0.319304	0	0	3.25477	6.61149	FRMD5;TMSB10
Positive Regulation of Protein Targeting to Mitochondrion (GO:1903955)	1/29	0.13538	0.32417	0	0	7.16883	14.3353	UBL5
Regulation of Monoatomic Ion Transmembrane Transport (GO:0034765)	1/29	0.13538	0.32417	0	0	7.16883	14.3353	KCNJ13
Cytokine-Mediated Signaling Pathway (GO:0019221)	3/255	0.135684	0.32417	0	0	2.41139	4.81658	PYCARD;SOCS3;CCL7
Regulation of Neuron Apoptotic Process (GO:0043523)	2/129	0.13623	0.32417	0	0	3.17741	6.33387	UBB;NUPR1
Positive Regulation of Defense Response (GO:0031349)	2/130	0.137929	0.32417	0	0	3.15242	6.24499	PYCARD;LGALS1
Negative Regulation of Cytokine Production Involved in Inflammatory Response (GO:1900016)	1/30	0.13971	0.32417	0	0	6.92128	13.6224	PYCARD
Positive Regulation of Interleukin-10 Production (GO:0032733)	1/30	0.13971	0.32417	0	0	6.92128	13.6224	PYCARD
GPI Anchored Protein Biosynthesis (GO:0180046)	1/30	0.13971	0.32417	0	0	6.92128	13.6224	PIGF
Negative Regulation of Mitotic Cell Cycle (GO:0045930)	1/30	0.13971	0.32417	0	0	6.92128	13.6224	AURKAIP1
Prostaglandin Metabolic Process (GO:0006693)	1/30	0.13971	0.32417	0	0	6.92128	13.6224	HPGDS
Regulation of Transmembrane Transport (GO:0034762)	1/30	0.13971	0.32417	0	0	6.92128	13.6224	KCNJ13
Pyroptotic Inflammatory Response (GO:0070269)	1/30	0.13971	0.32417	0	0	6.92128	13.6224	PYCARD
Artery Morphogenesis (GO:0048844)	1/31	0.144017	0.330295	0	0	6.69024	12.9645	ANGPTL3
Mesenchymal Cell Migration (GO:0090497)	1/31	0.144017	0.330295	0	0	6.69024	12.9645	HTR2B
Negative Regulation of Carbohydrate Metabolic Process (GO:0045912)	1/31	0.144017	0.330295	0	0	6.69024	12.9645	NUPR1
Protein Targeting (GO:0006605)	2/136	0.14822	0.337519	0	0	3.01036	5.74694	SRP14;AURKAIP1
Positive Regulation of Establishment of Protein Localization to Mitochondrion (GO:1903749)	1/32	0.148304	0.337519	0	0	6.4741	12.3558	UBL5
Regulation of Activated T Cell Proliferation (GO:0046006)	1/33	0.152569	0.345798	0	0	6.27146	11.7912	PYCARD
Regulation of Canonical NF-kappaB Signal Transduction (GO:0043122)	3/270	0.153106	0.345798	0	0	2.27418	4.26779	PYCARD;LGALS1;HTR2B
Triglyceride Homeostasis (GO:0070328)	1/34	0.156813	0.346272	0	0	6.08111	11.2665	ANGPTL3
Tumor Necrosis Factor-Mediated Signaling Pathway (GO:0033209)	1/34	0.156813	0.346272	0	0	6.08111	11.2665	PYCARD
Integrated Stress Response Signaling (GO:0140467)	1/34	0.156813	0.346272	0	0	6.08111	11.2665	NFE2L3
Calcium Ion Import (GO:0070509)	1/34	0.156813	0.346272	0	0	6.08111	11.2665	SLC24A5
Membrane Protein Proteolysis (GO:0033619)	1/34	0.156813	0.346272	0	0	6.08111	11.2665	PSENEN
Cellular Response to Osmotic Stress (GO:0071470)	1/34	0.156813	0.346272	0	0	6.08111	11.2665	PYCARD
Acetylcholine Receptor Signaling Pathway (GO:0095500)	1/35	0.161037	0.351675	0	0	5.90196	10.7777	LYNX1
Regulation of Mitochondrial Membrane Potential (GO:0051881)	1/35	0.161037	0.351675	0	0	5.90196	10.7777	UBB
Neural Crest Cell Migration (GO:0001755)	1/35	0.161037	0.351675	0	0	5.90196	10.7777	HTR2B
Protein Glycosylation (GO:0006486)	2/145	0.163935	0.354339	0	0	2.81961	5.09865	TMEM258;B3GALT2
Lytic Vacuole Organization (GO:0080171)	1/36	0.165239	0.354339	0	0	5.73304	10.3216	CLVS1
Cellular Response to Vascular Endothelial Growth Factor Stimulus (GO:0035924)	1/36	0.165239	0.354339	0	0	5.73304	10.3216	EGR3
Positive Regulation of RNA Splicing (GO:0033120)	1/36	0.165239	0.354339	0	0	5.73304	10.3216	RBMXL1
Negative Regulation of Cell Cycle Process (GO:0010948)	1/36	0.165239	0.354339	0	0	5.73304	10.3216	AURKAIP1
Positive Regulation of Metabolic Process (GO:0009893)	2/147	0.167468	0.355603	0	0	2.78044	4.96854	MFAP2;GADD45G
Antimicrobial Humoral Response (GO:0019730)	2/147	0.167468	0.355603	0	0	2.78044	4.96854	CCL7;RPL39
Regulation of Cold-Induced Thermogenesis (GO:0120161)	2/148	0.169239	0.355603	0	0	2.76125	4.90521	MFAP2;GADD45G
Intrinsic Apoptotic Signaling Pathway by P53 Class Mediator (GO:0072332)	1/37	0.16942	0.355603	0	0	5.57351	9.89507	PYCARD
Regulation of Release of Cytochrome C From Mitochondria (GO:0090199)	1/37	0.16942	0.355603	0	0	5.57351	9.89507	PYCARD
Microtubule Polymerization (GO:0046785)	1/37	0.16942	0.355603	0	0	5.57351	9.89507	SSNA1
Cellular Response to Growth Factor Stimulus (GO:0071363)	2/150	0.172791	0.360514	0	0	2.72366	4.78185	TMEM100;EGR3
Inner Mitochondrial Membrane Organization (GO:0007007)	1/38	0.173581	0.360514	0	0	5.4226	9.49559	TIMM10B
Neuron Projection Extension (GO:1990138)	1/38	0.173581	0.360514	0	0	5.4226	9.49559	SSNA1
Positive Regulation of Neuron Apoptotic Process (GO:0043525)	1/39	0.177721	0.366549	0	0	5.27964	9.1208	NUPR1
Positive Regulation of Extrinsic Apoptotic Signaling Pathway (GO:2001238)	1/39	0.177721	0.366549	0	0	5.27964	9.1208	PYCARD
Regulation of Cytokine-Mediated Signaling Pathway (GO:0001959)	1/40	0.18184	0.367391	0	0	5.144	8.76861	PYCARD
Female Gamete Generation (GO:0007292)	1/40	0.18184	0.367391	0	0	5.144	8.76861	REC114
Positive Regulation of Proteolysis Involved in Protein Catabolic Process (GO:1903052)	1/40	0.18184	0.367391	0	0	5.144	8.76861	NUPR1
Negative Regulation of Sequestering of Calcium Ion (GO:0051283)	1/40	0.18184	0.367391	0	0	5.144	8.76861	HTR2B
Nucleic Acid Catabolic Process (GO:0141188)	1/40	0.18184	0.367391	0	0	5.144	8.76861	RNASEH2C
Regulation of Protein Targeting to Mitochondrion (GO:1903214)	1/40	0.18184	0.367391	0	0	5.144	8.76861	UBL5
Neuron Projection Morphogenesis (GO:0048812)	2/157	0.185318	0.369391	0	0	2.59974	4.38233	UBB;SSNA1
Negative Regulation of Type I Interferon Production (GO:0032480)	1/41	0.185939	0.369391	0	0	5.01515	8.43717	PYCARD
Odontogenesis (GO:0042476)	1/41	0.185939	0.369391	0	0	5.01515	8.43717	AMELX
Organelle Transport Along Microtubule (GO:0072384)	1/41	0.185939	0.369391	0	0	5.01515	8.43717	UBB
Positive Regulation of Actin Filament Polymerization (GO:0030838)	1/41	0.185939	0.369391	0	0	5.01515	8.43717	PYCARD
Regulation of Cell Population Proliferation (GO:0042127)	6/769	0.187244	0.370679	0	0	1.60093	2.68211	KLF10;GLP2R;DHPS;HTR2B;NUPR1;AMELX
Regulation of Glycolytic Process (GO:0006110)	1/42	0.190018	0.370679	0	0	4.89258	8.12481	NUPR1
Potassium Ion Import Across Plasma Membrane (GO:1990573)	1/42	0.190018	0.370679	0	0	4.89258	8.12481	KCNJ13
Blood Vessel Diameter Maintenance (GO:0097746)	1/42	0.190018	0.370679	0	0	4.89258	8.12481	HTR2B
Lipid Catabolic Process (GO:0016042)	1/42	0.190018	0.370679	0	0	4.89258	8.12481	ANGPTL3
Synaptic Vesicle Exocytosis (GO:0016079)	1/43	0.194076	0.370679	0	0	4.77585	7.83004	STX19
Negative Regulation of Organelle Assembly (GO:1902116)	1/43	0.194076	0.370679	0	0	4.77585	7.83004	NUPR1
Neural Crest Cell Development (GO:0014032)	1/43	0.194076	0.370679	0	0	4.77585	7.83004	HTR2B
Release of Sequestered Calcium Ion Into Cytosol (GO:0051209)	1/43	0.194076	0.370679	0	0	4.77585	7.83004	HTR2B
Mitochondrial Transport (GO:0006839)	1/43	0.194076	0.370679	0	0	4.77585	7.83004	TIMM10B
Positive Regulation of Biomineral Tissue Development (GO:0070169)	1/43	0.194076	0.370679	0	0	4.77585	7.83004	AMELX
Regulation of Chemokine Production (GO:0032642)	1/43	0.194076	0.370679	0	0	4.77585	7.83004	PYCARD
Positive Regulation of Response to External Stimulus (GO:0032103)	2/163	0.196157	0.37123	0	0	2.50209	4.07551	PYCARD;LGALS1
Lysosome Organization (GO:0007040)	1/44	0.198114	0.37123	0	0	4.66455	7.55149	CLVS1
Regulation of Autophagosome Assembly (GO:2000785)	1/44	0.198114	0.37123	0	0	4.66455	7.55149	NUPR1
Positive Regulation of Cell Division (GO:0051781)	1/44	0.198114	0.37123	0	0	4.66455	7.55149	HTR2B
Embryonic Organ Morphogenesis (GO:0048562)	1/44	0.198114	0.37123	0	0	4.66455	7.55149	MFAP2
Substantia Nigra Development (GO:0021762)	1/44	0.198114	0.37123	0	0	4.66455	7.55149	DYNLL1
Positive Regulation of Cellular Process (GO:0048522)	5/622	0.200662	0.374821	0	0	1.64489	2.64191	FRMD5;GLP2R;DHPS;HTR2B;NUPR1
Endothelial Cell Migration (GO:0043542)	1/45	0.202133	0.375209	0	0	4.55831	7.28797	EGR3
Establishment of Protein Localization to Mitochondrion (GO:0072655)	1/45	0.202133	0.375209	0	0	4.55831	7.28797	AURKAIP1
Regulation of Interleukin-10 Production (GO:0032653)	1/46	0.206131	0.377319	0	0	4.45679	7.03836	PYCARD
Negative Regulation of Protein Serine/Threonine Kinase Activity (GO:0071901)	1/46	0.206131	0.377319	0	0	4.45679	7.03836	PYCARD
Central Nervous System Neuron Differentiation (GO:0021953)	1/46	0.206131	0.377319	0	0	4.45679	7.03836	NR4A2
BMP Signaling Pathway (GO:0030509)	1/47	0.210109	0.377319	0	0	4.35968	6.80166	TMEM100
Bicellular Tight Junction Assembly (GO:0070830)	1/47	0.210109	0.377319	0	0	4.35968	6.80166	OCEL1
Cellular Defense Response (GO:0006968)	1/47	0.210109	0.377319	0	0	4.35968	6.80166	CCR9
Regulation of Trans-Synaptic Signaling (GO:0099177)	1/47	0.210109	0.377319	0	0	4.35968	6.80166	LRRC4
Chemokine-Mediated Signaling Pathway (GO:0070098)	1/47	0.210109	0.377319	0	0	4.35968	6.80166	CCL7
Stem Cell Differentiation (GO:0048863)	1/47	0.210109	0.377319	0	0	4.35968	6.80166	HTR2B
Heart Development (GO:0007507)	2/171	0.210728	0.377319	0	0	2.38268	3.71028	HAND2;HTR2B
Regulation of Cytokine Production (GO:0001817)	2/172	0.212558	0.377319	0	0	2.36855	3.66779	HTR2B;IGF2BP3
Positive Regulation of Kinase Activity (GO:0033674)	1/48	0.214068	0.377319	0	0	4.26671	6.57696	JTB
Positive Regulation of Leukocyte Cell-Cell Adhesion (GO:1903039)	1/48	0.214068	0.377319	0	0	4.26671	6.57696	PYCARD
Oligosaccharide Metabolic Process (GO:0009311)	1/48	0.214068	0.377319	0	0	4.26671	6.57696	B3GALT2
Membrane Lipid Biosynthetic Process (GO:0046467)	1/48	0.214068	0.377319	0	0	4.26671	6.57696	ORMDL2
Cellular Response to Chemokine (GO:1990869)	1/48	0.214068	0.377319	0	0	4.26671	6.57696	CCL7
Secondary Alcohol Metabolic Process (GO:1902652)	1/48	0.214068	0.377319	0	0	4.26671	6.57696	ANGPTL3
Regulation of Cell Migration (GO:0030334)	4/479	0.218347	0.3821	0	0	1.70395	2.59284	FRMD5;CCL7;ANGPTL3;TMSB10
tRNA Processing (GO:0008033)	1/50	0.221927	0.3821	0	0	4.09215	6.16035	RPP21
GPCR Sgnlng Pway, Coupled to Cyclic Nucleotide Second Messenger (GO:0007187)	1/50	0.221927	0.3821	0	0	4.09215	6.16035	HTR2B
Positive Regulation of Lymphocyte Activation (GO:0051251)	1/50	0.221927	0.3821	0	0	4.09215	6.16035	PYCARD
Positive Regulation of Non-Canonical NF-kappaB Signal Transduction (GO:1901224)	1/50	0.221927	0.3821	0	0	4.09215	6.16035	PYCARD
Negative Regulation of Phosphorylation (GO:0042326)	1/50	0.221927	0.3821	0	0	4.09215	6.16035	DYNLL1
Regulation of Tumor Necrosis Factor-Mediated Signaling Pathway (GO:0010803)	1/50	0.221927	0.3821	0	0	4.09215	6.16035	PYCARD
Cognition (GO:0050890)	1/50	0.221927	0.3821	0	0	4.09215	6.16035	METTL23
Epithelial to Mesenchymal Transition (GO:0001837)	1/51	0.225827	0.384359	0	0	4.0101	5.96697	AMELX
Regulation of Interferon-Beta Production (GO:0032648)	1/51	0.225827	0.384359	0	0	4.0101	5.96697	PYCARD
Blood Vessel Morphogenesis (GO:0048514)	1/51	0.225827	0.384359	0	0	4.0101	5.96697	ANGPTL3
Macromolecule Glycosylation (GO:0043413)	1/51	0.225827	0.384359	0	0	4.0101	5.96697	B3GALT2
Neuron Differentiation (GO:0030182)	2/181	0.229089	0.386534	0	0	2.24843	3.31339	NR4A2;HAND2
Positive Regulation of Proteolysis (GO:0045862)	1/52	0.229708	0.386534	0	0	3.93127	5.7827	AURKAIP1
Intrinsic Apoptotic Signaling Pathway in Response to DNA Damage (GO:0008630)	1/52	0.229708	0.386534	0	0	3.93127	5.7827	PYCARD
Signal Transduction by P53 Class Mediator (GO:0072331)	1/52	0.229708	0.386534	0	0	3.93127	5.7827	PYCARD
Negative Regulation of Immune System Process (GO:0002683)	1/53	0.233569	0.388628	0	0	3.85548	5.60693	LRRC14
Antibacterial Humoral Response (GO:0019731)	1/53	0.233569	0.388628	0	0	3.85548	5.60693	RPL39
Regulation of Proteolysis (GO:0030162)	1/53	0.233569	0.388628	0	0	3.85548	5.60693	AURKAIP1
Ceramide Metabolic Process (GO:0006672)	1/53	0.233569	0.388628	0	0	3.85548	5.60693	ORMDL2
Tight Junction Assembly (GO:0120192)	1/54	0.237412	0.389565	0	0	3.78254	5.43914	OCEL1
Apical Junction Assembly (GO:0043297)	1/54	0.237412	0.389565	0	0	3.78254	5.43914	OCEL1
Cellular Response to BMP Stimulus (GO:0071773)	1/54	0.237412	0.389565	0	0	3.78254	5.43914	TMEM100
Plasma Membrane Bounded Cell Projection Morphogenesis (GO:0120039)	1/54	0.237412	0.389565	0	0	3.78254	5.43914	UBB
Positive Regulation of Chemokine Production (GO:0032722)	1/54	0.237412	0.389565	0	0	3.78254	5.43914	PYCARD
Regulation of Cytokine Production Involved in Inflammatory Response (GO:1900015)	1/55	0.241235	0.390446	0	0	3.71231	5.27884	PYCARD
DNA-templated DNA Replication (GO:0006261)	1/55	0.241235	0.390446	0	0	3.71231	5.27884	POLD4
Glycolipid Biosynthetic Process (GO:0009247)	1/55	0.241235	0.390446	0	0	3.71231	5.27884	PIGF
Icosanoid Metabolic Process (GO:0006690)	1/55	0.241235	0.390446	0	0	3.71231	5.27884	PYCARD
Regulation of Receptor Signaling Pathway via JAK-STAT (GO:0046425)	1/55	0.241235	0.390446	0	0	3.71231	5.27884	SOCS3
Positive Regulation of Interleukin-1 Beta Production (GO:0032731)	1/56	0.245039	0.393387	0	0	3.64463	5.12558	PYCARD
Cellular Response to Fibroblast Growth Factor Stimulus (GO:0044344)	1/56	0.245039	0.393387	0	0	3.64463	5.12558	EGR3
Sulfur Compound Biosynthetic Process (GO:0044272)	1/56	0.245039	0.393387	0	0	3.64463	5.12558	CHAC2
Heart Morphogenesis (GO:0003007)	1/57	0.248825	0.395882	0	0	3.57937	4.97892	HTR2B
mRNA Stabilization (GO:0048255)	1/57	0.248825	0.395882	0	0	3.57937	4.97892	IGF2BP3
Cellular Response to Interleukin-1 (GO:0071347)	1/57	0.248825	0.395882	0	0	3.57937	4.97892	PYCARD
Regulation of Mitotic Nuclear Division (GO:0007088)	1/58	0.252591	0.395882	0	0	3.51639	4.8385	AURKAIP1
Intracellular Iron Ion Homeostasis (GO:0006879)	1/58	0.252591	0.395882	0	0	3.51639	4.8385	ISCU
Positive Regulation of Type II Interferon Production (GO:0032729)	1/58	0.252591	0.395882	0	0	3.51639	4.8385	PYCARD
Muscle Organ Development (GO:0007517)	1/58	0.252591	0.395882	0	0	3.51639	4.8385	EGR3
Sprouting Angiogenesis (GO:0002040)	1/58	0.252591	0.395882	0	0	3.51639	4.8385	EGR3
Sterol Metabolic Process (GO:0016125)	1/58	0.252591	0.395882	0	0	3.51639	4.8385	ANGPTL3
Response to Interleukin-1 (GO:0070555)	1/59	0.256339	0.400698	0	0	3.45559	4.70394	PYCARD
Negative Regulation of Protein Kinase Activity (GO:0006469)	1/60	0.260068	0.402119	0	0	3.39685	4.57491	PYCARD
Neuron Migration (GO:0001764)	1/60	0.260068	0.402119	0	0	3.39685	4.57491	NR4A2
Post-Transcriptional Regulation of Gene Expression (GO:0010608)	1/60	0.260068	0.402119	0	0	3.39685	4.57491	RBM4B
Positive Regulation of Cell Cycle (GO:0045787)	1/60	0.260068	0.402119	0	0	3.39685	4.57491	NUPR1
Intracellular Signaling Cassette (GO:0141124)	3/354	0.260633	0.402119	0	0	1.72253	2.31619	NFE2L3;HTR2B;CCR9
Protein Localization to Membrane (GO:0072657)	2/199	0.262374	0.403757	0	0	2.04113	2.731	LRRC4;PRAM1
Negative Regulation of Canonical NF-kappaB Signal Transduction (GO:0043124)	1/61	0.263779	0.40487	0	0	3.34007	4.45112	PYCARD
Regulation of Translation (GO:0006417)	2/201	0.266081	0.406267	0	0	2.02041	2.67493	RBM4B;IGF2BP3
Regulation of Phagocytosis (GO:0050764)	1/62	0.267472	0.406267	0	0	3.28515	4.33226	PYCARD
Mitotic Cytokinesis (GO:0000281)	1/62	0.267472	0.406267	0	0	3.28515	4.33226	JTB
DNA-templated Transcription (GO:0006351)	2/203	0.269787	0.406267	0	0	2.0001	2.62038	NR4A2;NFE2L3
Positive Regulation of Interleukin-1 Production (GO:0032732)	1/63	0.271146	0.406267	0	0	3.232	4.21808	PYCARD
Positive Regulation of Interleukin-8 Production (GO:0032757)	1/63	0.271146	0.406267	0	0	3.232	4.21808	PYCARD
RNA Metabolic Process (GO:0016070)	1/63	0.271146	0.406267	0	0	3.232	4.21808	RNASEH2C
Canonical Wnt Signaling Pathway (GO:0060070)	1/63	0.271146	0.406267	0	0	3.232	4.21808	NR4A2
Negative Regulation of Cellular Process (GO:0048523)	4/531	0.274765	0.406267	0	0	1.5317	1.97871	KLF10;FRMD5;SERTAD3;NUPR1
Epigenetic Regulation of Gene Expression (GO:0040029)	1/64	0.274801	0.406267	0	0	3.18054	4.10832	METTL23
Positive Regulation of Phagocytosis (GO:0050766)	1/64	0.274801	0.406267	0	0	3.18054	4.10832	PYCARD
Granulocyte Chemotaxis (GO:0071621)	1/64	0.274801	0.406267	0	0	3.18054	4.10832	CCL7
Protein N-linked Glycosylation (GO:0006487)	1/64	0.274801	0.406267	0	0	3.18054	4.10832	TMEM258
Regulation of Extrinsic Apoptotic Signaling Pathway (GO:2001236)	1/65	0.278439	0.406267	0	0	3.13068	4.00275	PYCARD
Fat Cell Differentiation (GO:0045444)	1/65	0.278439	0.406267	0	0	3.13068	4.00275	NR4A2
Regulation of Phosphorylation (GO:0042325)	1/65	0.278439	0.406267	0	0	3.13068	4.00275	DYNLL1
Pattern Recognition Receptor Signaling Pathway (GO:0002221)	1/65	0.278439	0.406267	0	0	3.13068	4.00275	PYCARD
Protein Targeting to Membrane (GO:0006612)	1/65	0.278439	0.406267	0	0	3.13068	4.00275	SRP14
Positive Regulation of T Cell Proliferation (GO:0042102)	1/65	0.278439	0.406267	0	0	3.13068	4.00275	PYCARD
Negative Regulation of Autophagy (GO:0010507)	1/65	0.278439	0.406267	0	0	3.13068	4.00275	NUPR1
Modification-Dependent Protein Catabolic Process (GO:0019941)	2/208	0.279052	0.406267	0	0	1.95106	2.49025	UBB;UBA52
Regulation of Protein Serine/Threonine Kinase Activity (GO:0071900)	1/67	0.28566	0.414871	0	0	3.03551	3.80335	PYCARD
Cholesterol Metabolic Process (GO:0008203)	1/68	0.289244	0.418031	0	0	2.99005	3.70911	ANGPTL3
Regulation of T Cell Activation (GO:0050863)	1/68	0.289244	0.418031	0	0	2.99005	3.70911	PYCARD
Phospholipid Metabolic Process (GO:0006644)	1/69	0.29281	0.421135	0	0	2.94593	3.61829	ANGPTL3
Skin Development (GO:0043588)	1/69	0.29281	0.421135	0	0	2.94593	3.61829	ASCL4
Amide Biosynthetic Process (GO:0043604)	1/70	0.296358	0.425209	0	0	2.90309	3.5307	CHAC2
Positive Regulation of Protein Polymerization (GO:0032273)	1/71	0.299888	0.428206	0	0	2.86147	3.4462	PYCARD
Regulation of Actin Filament Polymerization (GO:0030833)	1/71	0.299888	0.428206	0	0	2.86147	3.4462	PYCARD
Defense Response to Bacterium (GO:0042742)	2/221	0.303097	0.43175	0	0	1.83403	2.18929	PYCARD;RPL39
Negative Regulation of Epithelial Cell Proliferation (GO:0050680)	1/73	0.306897	0.435076	0	0	2.78171	3.28587	NUPR1
DNA Replication (GO:0006260)	1/73	0.306897	0.435076	0	0	2.78171	3.28587	POLD4
Calcium Ion Transmembrane Import Into Cytosol (GO:0097553)	1/74	0.310375	0.436879	0	0	2.74346	3.20978	HTR2B
Negative Regulation of Apoptotic Signaling Pathway (GO:2001234)	1/74	0.310375	0.436879	0	0	2.74346	3.20978	NR4A2
Positive Regulation of Cytoskeleton Organization (GO:0051495)	1/74	0.310375	0.436879	0	0	2.74346	3.20978	PYCARD
Gland Development (GO:0048732)	1/75	0.313836	0.440706	0	0	2.70625	3.13623	HAND2
Glycoprotein Biosynthetic Process (GO:0009101)	1/76	0.31728	0.441368	0	0	2.67003	3.06512	B3GALT2
Positive Regulation of Protein Ubiquitination (GO:0031398)	1/76	0.31728	0.441368	0	0	2.67003	3.06512	UBB
Protein Deubiquitination (GO:0016579)	1/76	0.31728	0.441368	0	0	2.67003	3.06512	OTUD1
Regulation of Rho Protein Signal Transduction (GO:0035023)	1/76	0.31728	0.441368	0	0	2.67003	3.06512	ABRA
Positive Regulation of Interleukin-6 Production (GO:0032755)	1/77	0.320707	0.444055	0	0	2.63477	2.99634	PYCARD
Regulation of Non-Canonical NF-kappaB Signal Transduction (GO:1901222)	1/77	0.320707	0.444055	0	0	2.63477	2.99634	PYCARD
Apoptotic Process (GO:0006915)	2/232	0.323342	0.446663	0	0	1.74534	1.97057	PYCARD;IER3
RNA Catabolic Process (GO:0006401)	1/79	0.327509	0.449285	0	0	2.56695	2.86534	RNASEH2C
Positive Regulation of Protein Modification by Small Protein Conjugation or Removal (GO:1903322)	1/79	0.327509	0.449285	0	0	2.56695	2.86534	UBB
Sphingolipid Metabolic Process (GO:0006665)	1/79	0.327509	0.449285	0	0	2.56695	2.86534	ORMDL2
Cholesterol Homeostasis (GO:0042632)	1/80	0.330885	0.451229	0	0	2.53433	2.80293	ANGPTL3
Response to Tumor Necrosis Factor (GO:0034612)	1/80	0.330885	0.451229	0	0	2.53433	2.80293	PYCARD
Positive Regulation of Multicellular Organismal Process (GO:0051240)	3/407	0.332893	0.451229	0	0	1.4925	1.64165	MFAP2;HTR2B;GADD45G
Positive Regulation of Organelle Organization (GO:0010638)	1/81	0.334244	0.451229	0	0	2.50253	2.74248	PYCARD
Regulation of Catabolic Process (GO:0009894)	1/81	0.334244	0.451229	0	0	2.50253	2.74248	NUPR1
Negative Regulation of Cell Cycle (GO:0045786)	1/81	0.334244	0.451229	0	0	2.50253	2.74248	NUPR1
Sterol Homeostasis (GO:0055092)	1/81	0.334244	0.451229	0	0	2.50253	2.74248	ANGPTL3
Regulation of Interleukin-1 Beta Production (GO:0032651)	1/82	0.337586	0.453023	0	0	2.47151	2.6839	PYCARD
Positive Regulation of Tumor Necrosis Factor Production (GO:0032760)	1/82	0.337586	0.453023	0	0	2.47151	2.6839	PYCARD
Regulation of Interleukin-8 Production (GO:0032677)	1/83	0.340912	0.453023	0	0	2.44124	2.6271	PYCARD
Wnt Signaling Pathway (GO:0016055)	1/83	0.340912	0.453023	0	0	2.44124	2.6271	NR4A2
Regulation of Protein Kinase Activity (GO:0045859)	1/83	0.340912	0.453023	0	0	2.44124	2.6271	JTB
Organophosphate Metabolic Process (GO:0019637)	1/83	0.340912	0.453023	0	0	2.44124	2.6271	ANGPTL3
Sphingolipid Biosynthetic Process (GO:0030148)	1/83	0.340912	0.453023	0	0	2.44124	2.6271	ORMDL2
Cytoskeleton-Dependent Cytokinesis (GO:0061640)	1/84	0.344221	0.454676	0	0	2.41171	2.57202	JTB
Actomyosin Structure Organization (GO:0031032)	1/85	0.347513	0.454676	0	0	2.38288	2.51859	FRMD5
Positive Regulation of Tumor Necrosis Factor Superfamily Cytokine Production (GO:1903557)	1/85	0.347513	0.454676	0	0	2.38288	2.51859	PYCARD
Peptidyl-Lysine Modification (GO:0018205)	1/85	0.347513	0.454676	0	0	2.38288	2.51859	DHPS
Cell Morphogenesis Involved in Neuron Differentiation (GO:0048667)	1/85	0.347513	0.454676	0	0	2.38288	2.51859	SSNA1
Regulation of Cell Division (GO:0051302)	1/85	0.347513	0.454676	0	0	2.38288	2.51859	HTR2B
Positive Regulation of Endocytosis (GO:0045807)	1/85	0.347513	0.454676	0	0	2.38288	2.51859	PYCARD
Calcium Ion Transmembrane Transport (GO:0070588)	1/87	0.35405	0.457548	0	0	2.32723	2.4164	SLC24A5
Cellular Response to Tumor Necrosis Factor (GO:0071356)	1/87	0.35405	0.457548	0	0	2.32723	2.4164	PYCARD
Positive Regulation of Biosynthetic Process (GO:0009891)	1/87	0.35405	0.457548	0	0	2.32723	2.4164	AMELX
Defense Response to Gram-negative Bacterium (GO:0050829)	1/87	0.35405	0.457548	0	0	2.32723	2.4164	PYCARD
Regulation of Inflammatory Response (GO:0050727)	2/249	0.35433	0.457548	0	0	1.62381	1.68475	PYCARD;LGALS1
Positive Regulation of Cell Motility (GO:2000147)	2/249	0.35433	0.457548	0	0	1.62381	1.68475	CCL7;ANGPTL3
T Cell Receptor Signaling Pathway (GO:0050852)	1/88	0.357294	0.458385	0	0	2.30036	2.36752	PRAM1
Positive Regulation of Protein Kinase Activity (GO:0045860)	1/88	0.357294	0.458385	0	0	2.30036	2.36752	JTB
Regulation of Type II Interferon Production (GO:0032649)	1/88	0.357294	0.458385	0	0	2.30036	2.36752	PYCARD
Protein O-linked Glycosylation (GO:0006493)	1/91	0.366929	0.468722	0	0	2.22334	2.2291	B3GALT2
Phosphatidylinositol Biosynthetic Process (GO:0006661)	1/91	0.366929	0.468722	0	0	2.22334	2.2291	PIGF
Positive Regulation of Cell Adhesion (GO:0045785)	1/92	0.370109	0.471769	0	0	2.1988	2.18552	FRMD5
Regulation of Epithelial Cell Proliferation (GO:0050678)	1/93	0.373273	0.473769	0	0	2.17479	2.14314	NUPR1
Regulation of Protein Metabolic Process (GO:0051246)	1/93	0.373273	0.473769	0	0	2.17479	2.14314	RBM4B
Inflammatory Response (GO:0006954)	2/261	0.375914	0.475732	0	0	1.54763	1.51419	PYCARD;CCL7
Cellular Response to Peptide Hormone Stimulus (GO:0071375)	1/94	0.376421	0.475732	0	0	2.1513	2.10192	NR4A2
Positive Regulation of Immune Response (GO:0050778)	1/95	0.379554	0.478673	0	0	2.1283	2.06182	PYCARD
Regulation of mRNA Splicing, via Spliceosome (GO:0048024)	1/97	0.385772	0.484458	0	0	2.08375	1.98479	RBMXL1
Inorganic Cation Import Across Plasma Membrane (GO:0098659)	1/97	0.385772	0.484458	0	0	2.08375	1.98479	KCNJ13
Positive Regulation of Proteasomal Protein Catabolic Process (GO:1901800)	1/98	0.388858	0.485256	0	0	2.06217	1.9478	NUPR1
Positive Regulation of Supramolecular Fiber Organization (GO:1902905)	1/98	0.388858	0.485256	0	0	2.06217	1.9478	PYCARD
Defense Response to Gram-positive Bacterium (GO:0050830)	1/98	0.388858	0.485256	0	0	2.06217	1.9478	RPL39
Positive Regulation of Protein Catabolic Process (GO:0045732)	1/99	0.391929	0.488062	0	0	2.04102	1.91177	NUPR1
Monoatomic Ion Transport (GO:0006811)	1/100	0.394984	0.490838	0	0	2.0203	1.87668	SLC24A5
Negative Regulation of Translation (GO:0017148)	1/102	0.40105	0.496299	0	0	1.9801	1.80916	IGF2BP3
Phospholipase C-activating G Protein-Coupled Receptor Signaling Pathway (GO:0007200)	1/102	0.40105	0.496299	0	0	1.9801	1.80916	HTR2B
Regulation of Defense Response (GO:0031347)	1/103	0.40406	0.49816	0	0	1.96059	1.77667	PYCARD
Negative Regulation of Signal Transduction (GO:0009968)	2/277	0.404231	0.49816	0	0	1.4564	1.31916	NR4A2;LRRC14
Positive Regulation of NF-kappaB Transcription Factor Activity (GO:0051092)	1/105	0.410035	0.504267	0	0	1.92269	1.7141	PYCARD
Positive Regulation of Intracellular Signal Transduction (GO:1902533)	4/652	0.411881	0.50549	0	0	1.23791	1.09805	PYCARD;LGALS1;HTR2B;NUPR1
Axon Development (GO:0061564)	1/107	0.415951	0.509433	0	0	1.88622	1.65457	SSNA1
Positive Regulation of Vasculature Development (GO:1904018)	1/109	0.421809	0.515544	0	0	1.8511	1.59788	ANGPTL3
Cellular Response to Cytokine Stimulus (GO:0071345)	2/289	0.425073	0.518467	0	0	1.39465	1.19312	PYCARD;SOCS3
Positive Regulation of T Cell Activation (GO:0050870)	1/111	0.427608	0.519425	0	0	1.81726	1.54385	PYCARD
Regulation of Cellular Response to Stress (GO:0080135)	1/111	0.427608	0.519425	0	0	1.81726	1.54385	NUPR1
Regulation of Protein Ubiquitination (GO:0031396)	1/113	0.433349	0.523667	0	0	1.78463	1.49233	UBB
Transforming Growth Factor Beta Receptor Superfamily Signaling Pathway (GO:0141091)	1/114	0.436199	0.523667	0	0	1.76875	1.46746	TMEM100
Regulation of Interleukin-6 Production (GO:0032675)	1/114	0.436199	0.523667	0	0	1.76875	1.46746	PYCARD
Antigen Receptor-Mediated Signaling Pathway (GO:0050851)	1/114	0.436199	0.523667	0	0	1.76875	1.46746	PRAM1
Positive Regulation of Cell Population Proliferation (GO:0008284)	3/484	0.437104	0.523667	0	0	1.24862	1.03334	GLP2R;DHPS;HTR2B
Negative Regulation of Intracellular Signal Transduction (GO:1902532)	2/297	0.43876	0.523667	0	0	1.35628	1.11731	PYCARD;PEBP1
Negative Regulation of Growth (GO:0045926)	1/115	0.439034	0.523667	0	0	1.75315	1.44315	SERTAD3
Intrinsic Apoptotic Signaling Pathway (GO:0097193)	1/115	0.439034	0.523667	0	0	1.75315	1.44315	PYCARD
Protein Processing (GO:0016485)	1/115	0.439034	0.523667	0	0	1.75315	1.44315	PSENEN
Protein Complex Oligomerization (GO:0051259)	1/116	0.441855	0.525975	0	0	1.73781	1.4194	PYCARD
Modulation of Chemical Synaptic Transmission (GO:0050804)	1/117	0.444662	0.527204	0	0	1.72274	1.39618	LRRC4
Cytoskeleton Organization (GO:0007010)	1/117	0.444662	0.527204	0	0	1.72274	1.39618	CCL7
DNA Repair (GO:0006281)	2/302	0.447226	0.529188	0	0	1.33333	1.07292	RNASEH2C;POLD4
MAPK Cascade (GO:0000165)	1/119	0.450234	0.531688	0	0	1.69337	1.35129	HTR2B
Negative Regulation of Catabolic Process (GO:0009895)	1/120	0.452999	0.533892	0	0	1.67906	1.32959	NUPR1
Negative Regulation of Cell Growth (GO:0030308)	1/121	0.455751	0.536071	0	0	1.66498	1.30836	SERTAD3
Cellular Response to Molecule of Bacterial Origin (GO:0071219)	1/123	0.461213	0.541424	0	0	1.63752	1.26727	PYCARD
Cellular Response to Lipopolysaccharide (GO:0071222)	1/125	0.46662	0.546497	0	0	1.61095	1.22793	PYCARD
Calcium Ion Transport (GO:0006816)	1/126	0.469304	0.546497	0	0	1.59798	1.20888	SLC24A5
Positive Regulation of Angiogenesis (GO:0045766)	1/126	0.469304	0.546497	0	0	1.59798	1.20888	ANGPTL3
Protein Modification by Small Protein Conjugation (GO:0032446)	2/316	0.47055	0.546497	0	0	1.27298	0.959635	UBB;UBA52
Potassium Ion Transport (GO:0006813)	1/127	0.471974	0.546497	0	0	1.58522	1.19023	KCNJ13
Monocarboxylic Acid Metabolic Process (GO:0032787)	1/127	0.471974	0.546497	0	0	1.58522	1.19023	ANGPTL3
Negative Regulation of MAPK Cascade (GO:0043409)	1/127	0.471974	0.546497	0	0	1.58522	1.19023	PEBP1
Regulation of Cell Cycle (GO:0051726)	2/318	0.473835	0.547439	0	0	1.26479	0.944665	NUPR1;GADD45G
RNA Biosynthetic Process (GO:0032774)	1/128	0.474631	0.547439	0	0	1.57266	1.17197	NR4A2
Regulation of Protein Catabolic Process (GO:0042176)	1/129	0.477275	0.549421	0	0	1.56029	1.15409	UBB
Fatty Acid Metabolic Process (GO:0006631)	1/130	0.479906	0.551381	0	0	1.54812	1.13657	ANGPTL3
Regulation of Tumor Necrosis Factor Production (GO:0032680)	1/131	0.482523	0.552166	0	0	1.53613	1.11942	PYCARD
Regulation of Response to External Stimulus (GO:0032101)	1/132	0.485128	0.552166	0	0	1.52433	1.10261	PYCARD
Protein Localization to Plasma Membrane (GO:0072659)	1/132	0.485128	0.552166	0	0	1.52433	1.10261	PRAM1
Circulatory System Development (GO:0072359)	1/132	0.485128	0.552166	0	0	1.52433	1.10261	HAND2
Positive Regulation of Cytokine Production (GO:0001819)	2/325	0.485237	0.552166	0	0	1.23694	0.894452	PYCARD;HTR2B
Intracellular Protein Transport (GO:0006886)	2/326	0.486853	0.552946	0	0	1.23306	0.887545	TIMM10B;STX19
Potassium Ion Transmembrane Transport (GO:0071805)	1/134	0.490298	0.555795	0	0	1.50125	1.07001	KCNJ13
Protein Localization to Cell Periphery (GO:1990778)	1/136	0.495416	0.560528	0	0	1.47886	1.03869	PRAM1
Negative Regulation of Cell Motility (GO:2000146)	1/139	0.502999	0.568025	0	0	1.44649	0.993983	FRMD5
Cellular Response to Starvation (GO:0009267)	1/141	0.507991	0.572574	0	0	1.42569	0.965604	KLF10
Regulation of Cell Adhesion (GO:0030155)	1/142	0.510469	0.574277	0	0	1.4155	0.951821	FRMD5
Protein Homooligomerization (GO:0051260)	1/143	0.512934	0.575477	0	0	1.40546	0.938299	PYCARD
Protein Modification Process (GO:0036211)	3/545	0.515349	0.575477	0	0	1.10461	0.732262	UBL5;B3GALT2;UBA52
Synapse Organization (GO:0050808)	1/144	0.515387	0.575477	0	0	1.39556	0.925033	LRRC4
Positive Regulation of Cell Migration (GO:0030335)	2/344	0.515411	0.575477	0	0	1.16708	0.773533	CCL7;ANGPTL3
Negative Regulation of Protein Metabolic Process (GO:0051248)	1/146	0.520256	0.579797	0	0	1.37618	0.899241	IGF2BP3
Phosphate-Containing Compound Metabolic Process (GO:0006796)	1/150	0.529849	0.589383	0	0	1.33896	0.850458	ANGPTL3
Negative Regulation of Gene Expression (GO:0010629)	2/364	0.545906	0.606109	0	0	1.10148	0.666733	HAND2;IGF2BP3
Positive Regulation of Transcription by RNA Polymerase II (GO:0045944)	5/983	0.548985	0.60839	0	0	1.0183	0.610656	NR4A2;KLF10;METTL23;HAND2;ABRA
Protein Ubiquitination (GO:0016567)	2/369	0.553321	0.612054	0	0	1.08619	0.642827	UBB;UBA52
Response to Lipopolysaccharide (GO:0032496)	1/161	0.555263	0.613059	0	0	1.24621	0.733164	PYCARD
Negative Regulation of Cell Population Proliferation (GO:0008285)	2/379	0.567898	0.625847	0	0	1.05684	0.597974	KLF10;NUPR1
RNA Splicing, via Transesterification Reactions With Bulged Adenosine as Nucleophile (GO:0000377)	1/171	0.577183	0.632558	0	0	1.17231	0.644298	UBL5
Positive Regulation of Protein Phosphorylation (GO:0001934)	1/171	0.577183	0.632558	0	0	1.17231	0.644298	JTB
Cell-Cell Adhesion via Plasma-Membrane Adhesion Molecules (GO:0098742)	1/171	0.577183	0.632558	0	0	1.17231	0.644298	LRRC4
Positive Regulation of DNA-binding Transcription Factor Activity (GO:0051091)	1/174	0.583548	0.638356	0	0	1.15181	0.620396	PYCARD
Metal Ion Transport (GO:0030001)	1/180	0.595995	0.650774	0	0	1.11286	0.575931	KCNJ13
Positive Regulation of Catabolic Process (GO:0009896)	1/183	0.602079	0.656211	0	0	1.09435	0.555236	ANGPTL3
Anterograde Trans-Synaptic Signaling (GO:0098916)	1/189	0.613978	0.667954	0	0	1.0591	0.516626	HTR2B
Negative Regulation of Cytokine Production (GO:0001818)	1/191	0.617865	0.670597	0	0	1.04785	0.504523	PYCARD
Positive Regulation of DNA-templated Transcription (GO:0045893)	6/1274	0.61906	0.670597	0	0	0.937915	0.44978	NR4A2;KLF10;METTL23;SERTAD3;HAND2;ABRA
Generation of Neurons (GO:0048699)	1/192	0.619794	0.670597	0	0	1.04231	0.498607	NR4A2
Regulation of Programmed Cell Death (GO:0043067)	1/195	0.625524	0.675566	0	0	1.02603	0.48138	LGALS1
Response to Endoplasmic Reticulum Stress (GO:0034976)	1/196	0.627415	0.676378	0	0	1.02072	0.475806	TMEM258
Defense Response to Virus (GO:0051607)	1/198	0.631168	0.679192	0	0	1.01025	0.464902	PYCARD
Transcription by RNA Polymerase II (GO:0006366)	1/200	0.634884	0.67976	0	0	1	0.454313	NFE2L3
Axonogenesis (GO:0007409)	1/200	0.634884	0.67976	0	0	1	0.454313	SSNA1
Regulation of DNA-templated Transcription (GO:0006355)	10/2139	0.637038	0.67976	0	0	0.927457	0.418215	NR4A2;KLF10;EID1;SERTAD3;EGR3;ASCL4;MYCBP;SKIDA1;HAND2;NFE2L3
Negative Regulation of Macromolecule Biosynthetic Process (GO:0010558)	1/202	0.638563	0.67976	0	0	0.989949	0.444027	HAND2
Positive Regulation of Protein Metabolic Process (GO:0051247)	1/202	0.638563	0.67976	0	0	0.989949	0.444027	AURKAIP1
Adenylate Cyclase-Modulating G Protein-Coupled Receptor Signaling Pathway (GO:0007188)	1/202	0.638563	0.67976	0	0	0.989949	0.444027	GLP2R
Positive Regulation of Gene Expression (GO:0010628)	2/436	0.644452	0.684803	0	0	0.915358	0.402166	HAND2;HTR2B
Neuron Projection Development (GO:0031175)	1/206	0.64581	0.68502	0	0	0.970436	0.424322	UBB
mRNA Splicing, via Spliceosome (GO:0000398)	1/211	0.654668	0.691945	0	0	0.94709	0.401212	UBL5
Regulation of Angiogenesis (GO:0045765)	1/211	0.654668	0.691945	0	0	0.94709	0.401212	ANGPTL3
Regulation of Gene Expression (GO:0010468)	5/1127	0.67086	0.707799	0	0	0.880852	0.351632	METTL23;SERTAD3;MYCBP;HAND2;IGF2BP3
Regulation of Cell Growth (GO:0001558)	1/222	0.673391	0.70921	0	0	0.899447	0.355668	SERTAD3
Regulation of RNA Biosynthetic Process (GO:2001141)	2/465	0.679157	0.713584	0	0	0.856746	0.331477	SERTAD3;MYCBP
mRNA Processing (GO:0006397)	1/226	0.679947	0.713584	0	0	0.883277	0.340716	UBL5
Negative Regulation of RNA Biosynthetic Process (GO:1902679)	2/470	0.684858	0.71747	0	0	0.847375	0.320769	KLF10;EID1
Regulation of Autophagy (GO:0010506)	1/230	0.686373	0.717791	0	0	0.867672	0.326535	NUPR1
Cellular Response to Lipid (GO:0071396)	1/234	0.692671	0.723104	0	0	0.852603	0.313077	PYCARD
Regulation of Transcription by RNA Polymerase II (GO:0006357)	10/2250	0.700561	0.730059	0	0	0.875992	0.311742	NR4A2;KLF10;METTL23;EID1;EGR3;ASCL4;SKIDA1;HAND2;NFE2L3;ABRA
Cilium Assembly (GO:0060271)	1/247	0.712287	0.740978	0	0	0.807013	0.273799	DYNLL1
Negative Regulation of Transcription by RNA Polymerase II (GO:0000122)	3/732	0.713772	0.741224	0	0	0.81333	0.274249	NR4A2;KLF10;EID1
Positive Regulation of Signal Transduction (GO:0009967)	1/256	0.725136	0.751712	0	0	0.778174	0.250102	HAND2
Lipid Metabolic Process (GO:0006629)	1/259	0.729291	0.753496	0	0	0.769008	0.242762	ANGPTL3
Chemical Synaptic Transmission (GO:0007268)	1/260	0.730663	0.753496	0	0	0.766	0.240373	HTR2B
Regulation of MAPK Cascade (GO:0043408)	1/260	0.730663	0.753496	0	0	0.766	0.240373	PEBP1
Chromatin Remodeling (GO:0006338)	1/262	0.733385	0.754992	0	0	0.760053	0.235681	METTL23
Central Nervous System Development (GO:0007417)	1/288	0.766388	0.787603	0	0	0.690283	0.183662	NR4A2
RNA Processing (GO:0006396)	1/291	0.769925	0.789871	0	0	0.683037	0.178588	RPP21
Positive Regulation of Cell Differentiation (GO:0045597)	1/297	0.776842	0.795593	0	0	0.668987	0.168932	TMEM100
DNA Metabolic Process (GO:0006259)	1/302	0.782448	0.798581	0	0	0.657707	0.161353	REC114
Regulation of Intracellular Signal Transduction (GO:1902531)	1/302	0.782448	0.798581	0	0	0.657707	0.161353	PYCARD
Monoatomic Cation Transmembrane Transport (GO:0098655)	1/304	0.784652	0.799456	0	0	0.653299	0.158435	SLC24A5
Inorganic Cation Transmembrane Transport (GO:0098662)	1/307	0.787915	0.801131	0	0	0.646795	0.154173	SLC24A5
Protein Transport (GO:0015031)	1/308	0.788992	0.801131	0	0	0.644655	0.152783	STX19
Proteolysis (GO:0006508)	1/321	0.802509	0.813465	0	0	0.618056	0.135979	PSENEN
Positive Regulation of Macromolecule Biosynthetic Process (GO:0010557)	1/355	0.833943	0.843887	0	0	0.557724	0.101277	HAND2
Protein Localization (GO:0008104)	1/371	0.846968	0.85561	0	0	0.53317	0.0885556	STX19
Cellular Response to Oxygen-Containing Compound (GO:1901701)	1/384	0.856802	0.864075	0	0	0.51473	0.0795509	PYCARD
DNA Damage Response (GO:0006974)	1/421	0.881495	0.887471	0	0	0.468494	0.059094	IER3
Negative Regulation of DNA-templated Transcription (GO:0045892)	3/1006	0.884837	0.889329	0	0	0.582695	0.0712938	NR4A2;KLF10;EID1
Organelle Organization (GO:0006996)	1/437	0.89082	0.89383	0	0	0.450931	0.0521334	CCL7
Nervous System Development (GO:0007399)	1/480	0.912434	0.913972	0	0	0.409544	0.0375306	IGF2BP3
Positive Regulation of RNA Biosynthetic Process (GO:1902680)	1/555	0.940471	0.940471	0	0	0.352733	0.0216488	SERTAD3

## Sheet: Top93 shared 
Term	Overlap	P-value	Adjusted P-value	Old P-value	Old Adjusted P-value	Odds Ratio	Combined Score	Genes
Negative Regulation of Transcription by RNA Polymerase II (GO:0000122)	14/732	6.97059e-06	0.00725639	0	0	4.73619	56.2366	TSC22D4;DDX5;AEBP1;NR1D1;SMAD7;PURB;PER1;PER3;NR4A3;TBX20;BHLHE40;ID3;OGT;FGFR2
Negative Regulation of DNA-templated Transcription (GO:0045892)	16/1006	1.4748e-05	0.00767634	0	0	3.97051	44.1696	TSC22D4;DDX5;CHD4;AEBP1;NR1D1;SMAD7;PURB;PER1;PER3;NR4A3;TBX20;BHLHE40;PDCD4;ID3;OGT;FGFR2
Regulation of Cell Differentiation (GO:0045595)	7/201	4.25704e-05	0.0147719	0	0	8.27086	83.2408	DDX5;ROCK1;CHD4;NR1D1;YWHAG;FGFR2;SMAD7
Entrainment of Circadian Clock by Photoperiod (GO:0043153)	3/21	0.000121824	0.0209669	0	0	36.8315	331.96	PER1;PER3;BHLHE40
Regulation of Cell-Substrate Junction Assembly (GO:0090109)	3/21	0.000121824	0.0209669	0	0	36.8315	331.96	ROCK1;TLN1;RHOA
Photoperiodism (GO:0009648)	3/22	0.000140585	0.0209669	0	0	34.8912	309.475	PER1;PER3;BHLHE40
Mesenchymal Cell Differentiation (GO:0048762)	4/58	0.000153384	0.0209669	0	0	16.5235	145.119	DDX5;ROCK1;TBX20;FGFR2
Positive Regulation of BMP Signaling Pathway (GO:0030513)	3/23	0.000161129	0.0209669	0	0	33.145	289.465	TBX20;KCP;SULF1
Regulation of Circadian Sleep/Wake Cycle (GO:0042749)	2/5	0.000211963	0.0245171	0	0	145.817	1233.48	PER3;NR1D1
Cardiac Muscle Tissue Morphogenesis (GO:0055008)	3/30	0.000360785	0.0375577	0	0	24.5432	194.56	TBX20;FGFR2;SMAD7
Regulation of BMP Signaling Pathway (GO:0030510)	4/77	0.000457405	0.0416376	0	0	12.2112	93.9032	TBX20;KCP;SULF1;SMAD7
Negative Regulation of JNK Cascade (GO:0046329)	3/33	0.000479972	0.0416376	0	0	22.0856	168.773	DNAJA1;PER1;PDCD4
Response to Leptin (GO:0044321)	2/8	0.000588124	0.0470951	0	0	72.8974	542.253	NR4A3;NR1D1
Aortic Valve Morphogenesis (GO:0003180)	3/38	0.000729763	0.0523187	0	0	18.9257	136.696	ROCK1;TBX20;RHOA
Positive Regulation of Lipase Activity (GO:0060193)	2/9	0.000753871	0.0523187	0	0	62.4804	449.252	FGFR2;RHOA
Negative Regulation of JUN Kinase Activity (GO:0043508)	2/10	0.000939488	0.0600007	0	0	54.6676	381.043	DNAJA1;PDCD4
Cardiac Ventricle Morphogenesis (GO:0003208)	3/42	0.000979839	0.0600007	0	0	16.9812	117.648	TBX20;FGFR2;SMAD7
Embryonic Organ Morphogenesis (GO:0048562)	3/44	0.00112284	0.0649375	0	0	16.1512	109.697	MFAP5;TBX20;FGFR2
Regulation of Actin Filament Depolymerization (GO:0030834)	2/12	0.0013696	0.0750395	0	0	43.7297	288.32	PLEKHH2;CFL2
Positive Regulation of Leukocyte Cell-Cell Adhesion (GO:1903039)	3/48	0.00144683	0.0753077	0	0	14.7126	96.1965	NR4A3;YWHAG;RHOA
Negative Regulation of RNA Biosynthetic Process (GO:1902679)	8/470	0.00155897	0.0763725	0	0	3.96129	25.6047	TSC22D4;PER1;TBX20;BHLHE40;PDCD4;ID3;CHD4;NR1D1
Negative Regulation of Apoptotic Process (GO:0043066)	8/475	0.00166611	0.0763725	0	0	3.91787	25.0637	DNAJA1;GOLPH3;SON;AXL;KRIT1;ITGA5;PTMS;MCL1
Negative Regulation of Cell Migration (GO:0030336)	5/184	0.00168739	0.0763725	0	0	6.26206	39.9806	DDX18;KRIT1;SULF1;OGT;SMAD7
Positive Regulation of Cardiac Muscle Cell Proliferation (GO:0060045)	2/14	0.00187699	0.0771566	0	0	36.4377	228.759	TBX20;FGFR2
Embryonic Cranial Skeleton Morphogenesis (GO:0048701)	2/14	0.00187699	0.0771566	0	0	36.4377	228.759	MTHFD1L;FGFR2
Regulation of Focal Adhesion Assembly (GO:0051893)	3/53	0.00192706	0.0771566	0	0	13.238	82.7608	ROCK1;TLN1;RHOA
Regulation of Establishment of Cell Polarity (GO:2000114)	2/15	0.00215921	0.0791637	0	0	33.6331	206.441	ROCK1;KRIT1
Regulation of Establishment or Maintenance of Cell Polarity (GO:0032878)	2/16	0.00246022	0.0791637	0	0	31.2292	187.61	ROCK1;KRIT1
Regulation of Osteoblast Proliferation (GO:0033688)	2/16	0.00246022	0.0791637	0	0	31.2292	187.61	RHOA;FGFR2
Membrane Raft Organization (GO:0031579)	2/16	0.00246022	0.0791637	0	0	31.2292	187.61	COLEC12;ANXA2
Cellular Response to Molecule of Bacterial Origin (GO:0071219)	4/123	0.0026089	0.0791637	0	0	7.47352	44.4586	AXL;PDCD4;NR1D1;RHOA
Cellular Response to Lipopolysaccharide (GO:0071222)	4/125	0.00276546	0.0791637	0	0	7.34924	43.2911	AXL;PDCD4;NR1D1;RHOA
Positive Regulation of Cardiac Muscle Tissue Growth (GO:0055023)	2/17	0.00277984	0.0791637	0	0	29.1458	171.534	TBX20;FGFR2
Leukocyte Tethering or Rolling (GO:0050901)	2/17	0.00277984	0.0791637	0	0	29.1458	171.534	GOLPH3;ROCK1
Negative Regulation of Anoikis (GO:2000811)	2/17	0.00277984	0.0791637	0	0	29.1458	171.534	ITGA5;MCL1
Regulation of Cell Motility (GO:2000145)	4/126	0.0028461	0.0791637	0	0	7.28864	42.7246	ROCK1;TMSB4X;LMNA;RHOA
Negative Regulation of Canonical NF-kappaB Signal Transduction (GO:0043124)	3/61	0.00288239	0.0791637	0	0	11.4075	66.7238	PER1;TMSB4X;NR1D1
Regulation of Signal Transduction (GO:0009966)	5/211	0.00305576	0.0791637	0	0	5.43386	31.466	ILK;SULF1;OGT;YWHAG;FGFR2
Establishment of Epithelial Cell Polarity (GO:0090162)	2/18	0.00311788	0.0791637	0	0	27.3228	157.669	GOLPH3;RHOA
Extracellular Matrix Assembly (GO:0085029)	2/18	0.00311788	0.0791637	0	0	27.3228	157.669	DDX18;MFAP4
Positive Regulation of Muscle Hypertrophy (GO:0014742)	2/18	0.00311788	0.0791637	0	0	27.3228	157.669	NR4A3;ROCK1
Regulation of Cell-Matrix Adhesion (GO:0001952)	3/65	0.00345182	0.0841074	0	0	10.6694	60.483	ROCK1;TLN1;RHOA
Leukocyte Adhesion to Vascular Endothelial Cell (GO:0061756)	2/19	0.00347418	0.0841074	0	0	25.7143	145.605	GOLPH3;ROCK1
Cell-Cell Junction Assembly (GO:0007043)	3/67	0.00376049	0.0889698	0	0	10.3349	57.7018	TLN1;RHOA;SMAD7
Positive Regulation of Cardiac Muscle Hypertrophy (GO:0010613)	2/20	0.00384856	0.08903	0	0	24.2845	135.023	NR4A3;ROCK1
Regulation of Cardiac Muscle Cell Proliferation (GO:0060043)	2/21	0.00424085	0.0959722	0	0	23.0052	125.677	TBX20;FGFR2
Regulation of Anoikis (GO:2000209)	2/22	0.00465088	0.0996346	0	0	21.8538	117.37	ITGA5;MCL1
Negative Regulation of Epithelial Cell Proliferation (GO:0050680)	3/73	0.00478552	0.0996346	0	0	9.44619	50.4631	KRIT1;SULF1;FGFR2
DNA Replication (GO:0006260)	3/73	0.00478552	0.0996346	0	0	9.44619	50.4631	REV1;TOP1;PTMS
Positive Regulation of TOR Signaling (GO:0032008)	3/73	0.00478552	0.0996346	0	0	9.44619	50.4631	GOLPH3;MAT2A;OGT
Regulation of Neuron Differentiation (GO:0045664)	3/76	0.00535522	0.108489	0	0	9.05662	47.3633	ROCK1;YWHAG;RHOA
Outflow Tract Septum Morphogenesis (GO:0003148)	2/24	0.00552347	0.108489	0	0	19.8651	103.274	TBX20;FGFR2
Ventricular Cardiac Muscle Tissue Development (GO:0003229)	2/24	0.00552347	0.108489	0	0	19.8651	103.274	FGFR2;SMAD7
Regulation of Protein Transport (GO:0051223)	2/25	0.0059857	0.113293	0	0	19.0005	97.2517	RHBDF1;DNAJA1
Regulation of Cardiac Muscle Hypertrophy (GO:0010611)	2/25	0.0059857	0.113293	0	0	19.0005	97.2517	NR4A3;ROCK1
Negative Regulation of Blood Vessel Morphogenesis (GO:2000181)	3/82	0.0066127	0.118667	0	0	8.36624	41.9882	ROCK1;KRIT1;SULF1
Response to Lipopolysaccharide (GO:0032496)	4/161	0.00678128	0.118667	0	0	5.65376	28.2326	AXL;PDCD4;NR1D1;RHOA
Positive Regulation of Signal Transduction (GO:0009967)	5/256	0.00688624	0.118667	0	0	4.44947	22.1505	AXL;ILK;ITGA5;SULF1;FGFR2
Wound Healing, Spreading of Cells (GO:0044319)	2/27	0.00696119	0.118667	0	0	17.4787	86.8237	ITGA5;RHOA
Regulation of Cell Migration (GO:0030334)	7/479	0.00698865	0.118667	0	0	3.35152	16.6352	ROCK1;TMSB4X;LMNA;SULF1;OGT;RHOA;SMAD7
Cytoskeleton-Dependent Cytokinesis (GO:0061640)	3/84	0.00706757	0.118667	0	0	8.15885	40.4046	SON;ROCK1;RHOA
+ Reg of Transmembrane Receptor Prot Serine/Threonine Kinase Sgnlng Pway (GO:0090100)	3/84	0.00706757	0.118667	0	0	8.15885	40.4046	TBX20;KCP;SULF1
Actomyosin Structure Organization (GO:0031032)	3/85	0.0073018	0.120653	0	0	8.05894	39.6471	CSRP2;ROCK1;RHOA
Cellular Response to Tumor Necrosis Factor (GO:0071356)	3/87	0.00778396	0.126611	0	0	7.86627	38.1962	TMSB4X;ILK;NR1D1
Negative Regulation of Cytoskeleton Organization (GO:0051494)	2/29	0.00800363	0.128181	0	0	16.1823	78.1261	PLEKHH2;TMSB4X
Dorsal/Ventral Pattern Formation (GO:0009953)	2/30	0.00854955	0.131412	0	0	15.6036	74.3025	TBX20;TLL2
Regulation of Canonical NF-kappaB Signal Transduction (GO:0043122)	5/270	0.00856224	0.131412	0	0	4.21141	20.048	PER1;TMSB4X;ILK;NR1D1;RHOA
Protein O-linked Glycosylation (GO:0006493)	3/91	0.00880364	0.131412	0	0	7.5072	35.5285	DPM1;PLOD2;OGT
Negative Regulation of Programmed Cell Death (GO:0043069)	6/382	0.00883673	0.131412	0	0	3.58236	16.9404	DNAJA1;GOLPH3;SON;AXL;PTMS;MCL1
Cellular Response to Oxygen-Containing Compound (GO:1901701)	6/384	0.00905321	0.131412	0	0	3.56304	16.7628	NR4A3;MAT2A;AXL;PDCD4;NR1D1;RHOA
Positive Regulation of Signaling (GO:0023056)	2/31	0.00911172	0.131412	0	0	15.0648	70.7773	ANXA2;ILK
Negative Regulation of MAP Kinase Activity (GO:0043407)	2/31	0.00911172	0.131412	0	0	15.0648	70.7773	DNAJA1;PDCD4
Regulation of Epithelial Cell Proliferation (GO:0050678)	3/93	0.00934145	0.131412	0	0	7.33963	34.3002	NR4A3;NR1D1;FGFR2
Negative Regulation of Angiogenesis (GO:0016525)	3/93	0.00934145	0.131412	0	0	7.33963	34.3002	ROCK1;KRIT1;SULF1
Ventricular Cardiac Muscle Tissue Morphogenesis (GO:0055010)	2/33	0.0102842	0.138014	0	0	14.0915	64.4987	FGFR2;SMAD7
Extracellular Matrix Organization (GO:0030198)	4/182	0.0103349	0.138014	0	0	4.98144	22.7763	DDX18;FLRT2;TLL2;PLOD2
Regulation of mRNA Splicing, via Spliceosome (GO:0048024)	3/97	0.0104737	0.138014	0	0	7.02589	32.0302	DDX5;SON;ARGLU1
Muscle Contraction (GO:0006936)	3/97	0.0104737	0.138014	0	0	7.02589	32.0302	MYL6;ROCK1;MYOF
Regulation of TORC1 Signaling (GO:1903432)	3/97	0.0104737	0.138014	0	0	7.02589	32.0302	MAT2A;OGT;YWHAG
Tumor Necrosis Factor-Mediated Signaling Pathway (GO:0033209)	2/34	0.0108942	0.139341	0	0	13.6504	61.6934	TMSB4X;ILK
Regulation of JUN Kinase Activity (GO:0043506)	2/34	0.0108942	0.139341	0	0	13.6504	61.6934	DNAJA1;PDCD4
Positive Regulation of Intracellular Signal Transduction (GO:1902533)	8/652	0.010976	0.139341	0	0	2.8152	12.7023	GOLPH3;PTGIS;ROCK1;AXL;PDCD4;ILK;RHOA;FGFR2
Platelet Aggregation (GO:0070527)	2/35	0.0115197	0.140517	0	0	13.2361	59.0819	ILK;TLN1
Substrate Adhesion-Dependent Cell Spreading (GO:0034446)	2/35	0.0115197	0.140517	0	0	13.2361	59.0819	ILK;RHOA
Hemopoiesis (GO:0030097)	3/101	0.0116823	0.140517	0	0	6.73776	29.9809	MFAP5;OGT;FGFR2
mRNA Metabolic Process (GO:0016071)	3/101	0.0116823	0.140517	0	0	6.73776	29.9809	ATXN2L;DDX5;SON
Macromolecule Biosynthetic Process (GO:0009059)	4/189	0.0117435	0.140517	0	0	4.79125	21.2945	DDX18;GOLPH3;KPNA4;RPL10A
Endoderm Formation (GO:0001706)	2/36	0.0121608	0.143857	0	0	12.8462	56.6456	TBX20;ITGA5
Cell Surface Receptor Protein Tyrosine Kinase Signaling Pathway (GO:0007169)	5/296	0.0123895	0.144915	0	0	3.83005	16.8174	NR4A3;FLRT2;AXL;SULF1;FGFR2
Regulation of Sodium Ion Transport (GO:0002028)	2/37	0.0128172	0.148252	0	0	12.4785	54.3684	PER1;NKAIN3
Negative Regulation of Endothelial Cell Proliferation (GO:0001937)	2/38	0.0134887	0.150986	0	0	12.1313	52.236	KRIT1;SULF1
Regulation of Vascular Associated Smooth Muscle Cell Proliferation (GO:1904705)	2/38	0.0134887	0.150986	0	0	12.1313	52.236	NR4A3;PDCD4
Membrane Assembly (GO:0071709)	2/38	0.0134887	0.150986	0	0	12.1313	52.236	PTPRD;ANXA2
Regulation of Metal Ion Transport (GO:0010959)	2/39	0.0141752	0.156983	0	0	11.8028	50.2357	PER1;NKAIN3
Fibroblast Growth Factor Receptor Signaling Pathway (GO:0008543)	2/40	0.0148766	0.162234	0	0	11.4916	48.3563	FLRT2;FGFR2
Positive Regulation of Apoptotic Process (GO:0043065)	5/313	0.0154393	0.162234	0	0	3.61552	15.0797	DNAJA1;PTGIS;ADAMTSL4;PDCD4;MCL1
Aortic Valve Development (GO:0003176)	2/41	0.0155927	0.162234	0	0	11.1964	46.5877	ROCK1;TBX20
Regulation of Primary Metabolic Process (GO:0080090)	3/113	0.0157735	0.162234	0	0	5.99909	24.8928	SON;AHNAK2;NR1D1
Positive Regulation of Wnt Signaling Pathway (GO:0030177)	3/114	0.0161463	0.162234	0	0	5.94474	24.5284	ILK;SULF1;FGFR2
Transforming Growth Factor Beta Receptor Superfamily Signaling Pathway (GO:0141091)	3/114	0.0161463	0.162234	0	0	5.94474	24.5284	DDX5;PDCD4;SMAD7
Protein Processing (GO:0016485)	3/115	0.0165241	0.162234	0	0	5.89137	24.1719	TLL2;AEBP1;OGT
Regulation of Angiogenesis (GO:0045765)	4/211	0.0169538	0.162234	0	0	4.27726	17.4395	PTGIS;ROCK1;KRIT1;SULF1
Proteolysis (GO:0006508)	5/321	0.0170345	0.162234	0	0	3.52255	14.3456	DPP4;CAPN7;TLL2;AEBP1;OGT
Bone Development (GO:0060348)	2/44	0.0178277	0.162234	0	0	10.3951	41.861	SULF1;FGFR2
Carbohydrate Derivative Biosynthetic Process (GO:1901137)	2/44	0.0178277	0.162234	0	0	10.3951	41.861	DPM1;GOLPH3
Positive Regulation of Cell Division (GO:0051781)	2/44	0.0178277	0.162234	0	0	10.3951	41.861	RHOA;FGFR2
Collagen Fibril Organization (GO:0030199)	2/45	0.0186011	0.162234	0	0	10.1528	40.4543	TLL2;PLOD2
Endothelial Cell Migration (GO:0043542)	2/45	0.0186011	0.162234	0	0	10.1528	40.4543	DPP4;RHOA
Negative Regulation of Defense Response (GO:0031348)	3/121	0.0188947	0.162234	0	0	5.59011	22.1865	PTGIS;TMSB4X;NR1D1
Negative Regulation of Inflammatory Response (GO:0050728)	3/121	0.0188947	0.162234	0	0	5.59011	22.1865	PTGIS;TMSB4X;NR1D1
Negative Regulation of DNA-binding Transcription Factor Activity (GO:0043433)	3/122	0.0193072	0.162234	0	0	5.54286	21.8792	PTGIS;BHLHE40;ID3
Homotypic Cell-Cell Adhesion (GO:0034109)	2/46	0.0193885	0.162234	0	0	9.92158	39.1215	ILK;TLN1
Regulation of Cell-Cell Adhesion (GO:0022407)	2/46	0.0193885	0.162234	0	0	9.92158	39.1215	DPP4;YWHAG
BMP Signaling Pathway (GO:0030509)	2/47	0.0201898	0.162234	0	0	9.70061	37.8574	DDX5;PDCD4
Regulation of Endothelial Cell Apoptotic Process (GO:2000351)	2/47	0.0201898	0.162234	0	0	9.70061	37.8574	KRIT1;PDCD4
Intracellular Glucose Homeostasis (GO:0001678)	2/47	0.0201898	0.162234	0	0	9.70061	37.8574	NR1D1;OGT
Blood Circulation (GO:0008015)	2/48	0.0210047	0.162234	0	0	9.48925	36.6571	ROCK1;MYOF
Positive Regulation of Cell-Cell Adhesion (GO:0022409)	2/50	0.022675	0.162234	0	0	9.09295	34.4304	YWHAG;SMAD7
Positive Regulation of Non-Canonical NF-kappaB Signal Transduction (GO:1901224)	2/50	0.022675	0.162234	0	0	9.09295	34.4304	PDCD4;RHOA
Regulation of Circadian Sleep/Wake Cycle, Sleep (GO:0045187)	1/5	0.0230369	0.162234	0	0	54.0842	203.933	PER3
Negative Regulation of Morphogenesis of an Epithelium (GO:1905331)	1/5	0.0230369	0.162234	0	0	54.0842	203.933	SULF1
Negative Regulation of Nuclear Receptor-Mediated Glucocorticoid Signaling Pathway (GO:2000323)	1/5	0.0230369	0.162234	0	0	54.0842	203.933	PER1
Regulation of Morphogenesis of a Branching Structure (GO:0060688)	1/5	0.0230369	0.162234	0	0	54.0842	203.933	FGFR2
Regulation of Plasma Membrane Repair (GO:1905684)	1/5	0.0230369	0.162234	0	0	54.0842	203.933	ANXA2
Cell Surface Receptor Protein Tyrosine Phosphatase Signaling Pathway (GO:0007185)	1/5	0.0230369	0.162234	0	0	54.0842	203.933	PTPRD
Regulation of Synaptic Vesicle Recycling (GO:1903421)	1/5	0.0230369	0.162234	0	0	54.0842	203.933	ROCK1
Pericardium Morphogenesis (GO:0003344)	1/5	0.0230369	0.162234	0	0	54.0842	203.933	TBX20
Plasma Membrane Raft Organization (GO:0044857)	1/5	0.0230369	0.162234	0	0	54.0842	203.933	COLEC12
Regulation of Ventricular Cardiac Muscle Cell Membrane Depolarization (GO:0060373)	1/5	0.0230369	0.162234	0	0	54.0842	203.933	SMAD7
Podocyte Cell Migration (GO:0090521)	1/5	0.0230369	0.162234	0	0	54.0842	203.933	ROCK1
Polyprenol Metabolic Process (GO:0016093)	1/5	0.0230369	0.162234	0	0	54.0842	203.933	DPM1
Chondrocyte Development (GO:0002063)	1/5	0.0230369	0.162234	0	0	54.0842	203.933	SULF1
Epithelial Tube Branching Involved in Lung Morphogenesis (GO:0060441)	1/5	0.0230369	0.162234	0	0	54.0842	203.933	FGFR2
Tricuspid Valve Development (GO:0003175)	1/5	0.0230369	0.162234	0	0	54.0842	203.933	TBX20
Venous Blood Vessel Morphogenesis (GO:0048845)	1/5	0.0230369	0.162234	0	0	54.0842	203.933	TBX20
Positive Regulation of Peroxisome Proliferator Activated Receptor Signaling Pathway (GO:0035360)	1/5	0.0230369	0.162234	0	0	54.0842	203.933	PTGIS
Hyaluronan Biosynthetic Process (GO:0030213)	1/5	0.0230369	0.162234	0	0	54.0842	203.933	DDX18
Receptor-Mediated Virion Attachment to Host Cell (GO:0046813)	1/5	0.0230369	0.162234	0	0	54.0842	203.933	DPP4
Negative Regulation of T-helper 17 Type Immune Response (GO:2000317)	1/5	0.0230369	0.162234	0	0	54.0842	203.933	SMAD7
Negative Regulation of Actin Filament Depolymerization (GO:0030835)	1/5	0.0230369	0.162234	0	0	54.0842	203.933	PLEKHH2
Negative Regulation of Astrocyte Differentiation (GO:0048712)	1/5	0.0230369	0.162234	0	0	54.0842	203.933	NR1D1
Negative Regulation of Cardiac Muscle Adaptation (GO:0010616)	1/5	0.0230369	0.162234	0	0	54.0842	203.933	LMNA
Negative Regulation of Cardiac Muscle Hypertrophy in Response to Stress (GO:1903243)	1/5	0.0230369	0.162234	0	0	54.0842	203.933	LMNA
Negative Regulation of Cell Size (GO:0045792)	1/5	0.0230369	0.162234	0	0	54.0842	203.933	RHOA
Regulation of Secretion by Cell (GO:1903530)	2/51	0.0235301	0.162234	0	0	8.90693	33.3963	RHBDF1;MYOF
Epithelial to Mesenchymal Transition (GO:0001837)	2/51	0.0235301	0.162234	0	0	8.90693	33.3963	DDX5;ROCK1
Cellular Response to Lipid (GO:0071396)	4/234	0.0237442	0.162234	0	0	3.84504	14.3821	AXL;PDCD4;NR1D1;RHOA
Negative Regulation of Protein Ubiquitination (GO:0031397)	2/52	0.0243984	0.162234	0	0	8.72835	32.4105	DNAJA1;OGT
Positive Regulation of TORC1 Signaling (GO:1904263)	2/52	0.0243984	0.162234	0	0	8.72835	32.4105	MAT2A;OGT
Glycoprotein Metabolic Process (GO:0009100)	2/52	0.0243984	0.162234	0	0	8.72835	32.4105	GOLPH3;MAN2B1
Regulation of Cell Development (GO:0060284)	2/52	0.0243984	0.162234	0	0	8.72835	32.4105	ANXA2;BHLHE40
Intracellular Signaling Cassette (GO:0141124)	5/354	0.0247648	0.162234	0	0	3.1841	11.7758	GUCY1A2;KRIT1;ACKR4;PDE7B;SMAD7
Negative Regulation of Protein Catabolic Process (GO:0042177)	2/53	0.0252796	0.162234	0	0	8.55678	31.4698	ANXA2;ROCK1
Cellular Response to BMP Stimulus (GO:0071773)	2/54	0.0261737	0.162234	0	0	8.3918	30.5713	DDX5;PDCD4
Regulation of Cytokine Production Involved in Inflammatory Response (GO:1900015)	2/55	0.0270805	0.162234	0	0	8.23305	29.7126	PER1;PDCD4
Rho Protein Signal Transduction (GO:0007266)	2/55	0.0270805	0.162234	0	0	8.23305	29.7126	ROCK1;RHOA
Regulation of Alternative mRNA Splicing, via Spliceosome (GO:0000381)	2/55	0.0270805	0.162234	0	0	8.23305	29.7126	DDX5;ARGLU1
Negative Regulation of Cell Motility (GO:2000146)	3/139	0.0270818	0.162234	0	0	4.84583	17.4881	SULF1;OGT;SMAD7
Negative Regulation of Establishment of Protein Localization to Mitochondrion (GO:1903748)	1/6	0.0275809	0.162234	0	0	43.2652	155.349	DNAJA1
Negative Regulation of Membrane Protein Ectodomain Proteolysis (GO:0051045)	1/6	0.0275809	0.162234	0	0	43.2652	155.349	ROCK1
Regulation of Nuclear Receptor-Mediated Glucocorticoid Signaling Pathway (GO:2000322)	1/6	0.0275809	0.162234	0	0	43.2652	155.349	PER1
Regulation of Type B Pancreatic Cell Proliferation (GO:0061469)	1/6	0.0275809	0.162234	0	0	43.2652	155.349	NR4A3
Regulation of Vascular Associated Smooth Muscle Cell Apoptotic Process (GO:1905459)	1/6	0.0275809	0.162234	0	0	43.2652	155.349	PDCD4
Regulation of Vascular Associated Smooth Muscle Cell Differentiation (GO:1905063)	1/6	0.0275809	0.162234	0	0	43.2652	155.349	PDCD4
Response to Catecholamine (GO:0071869)	1/6	0.0275809	0.162234	0	0	43.2652	155.349	NR4A3
Cleavage Furrow Formation (GO:0036089)	1/6	0.0275809	0.162234	0	0	43.2652	155.349	RHOA
Positive Regulation of Amyloid-Beta Clearance (GO:1900223)	1/6	0.0275809	0.162234	0	0	43.2652	155.349	ROCK1
Definitive Hemopoiesis (GO:0060216)	1/6	0.0275809	0.162234	0	0	43.2652	155.349	MFAP5
Synaptic Vesicle Clustering (GO:0097091)	1/6	0.0275809	0.162234	0	0	43.2652	155.349	SYN3
Synaptic Vesicle Localization (GO:0097479)	1/6	0.0275809	0.162234	0	0	43.2652	155.349	SYN3
Epithelial Tube Formation (GO:0072175)	1/6	0.0275809	0.162234	0	0	43.2652	155.349	FGFR2
Positive Regulation of Mast Cell Activation (GO:0033005)	1/6	0.0275809	0.162234	0	0	43.2652	155.349	NR4A3
Gland Morphogenesis (GO:0022612)	1/6	0.0275809	0.162234	0	0	43.2652	155.349	FGFR2
Positive Regulation of Pinocytosis (GO:0048549)	1/6	0.0275809	0.162234	0	0	43.2652	155.349	AXL
Myoblast Migration (GO:0051451)	1/6	0.0275809	0.162234	0	0	43.2652	155.349	ROCK1
- Reg of Adaptive Imm Resp Based on Som Recomb of Imm Rcptrs Built Frm IgSF Domains (GO:0002823)	1/6	0.0275809	0.162234	0	0	43.2652	155.349	SMAD7
Cellular Response to Fibroblast Growth Factor Stimulus (GO:0044344)	2/56	0.0279998	0.162234	0	0	8.08018	28.8911	FLRT2;FGFR2
Response to Peptide Hormone (GO:0043434)	2/56	0.0279998	0.162234	0	0	8.08018	28.8911	ROCK1;OGT
Cellular Response to Interleukin-1 (GO:0071347)	2/57	0.0289316	0.162234	0	0	7.93287	28.1047	PTGIS;NR1D1
Heart Morphogenesis (GO:0003007)	2/57	0.0289316	0.162234	0	0	7.93287	28.1047	FLRT2;TBX20
Regulation of Inflammatory Response (GO:0050727)	4/249	0.0289482	0.162234	0	0	3.60688	12.7765	PTGIS;TMSB4X;PDCD4;NR1D1
Negative Regulation of Protein Modification by Small Protein Conjugation or Removal (GO:1903321)	2/58	0.0298758	0.162234	0	0	7.79082	27.3513	DNAJA1;OGT
Protein Glycosylation (GO:0006486)	3/145	0.0301692	0.162234	0	0	4.63967	16.2432	DPM1;PLOD2;OGT
Response to Interleukin-1 (GO:0070555)	2/59	0.0308321	0.162234	0	0	7.65375	26.6289	PTGIS;NR1D1
Negative Regulation of Hematopoietic Progenitor Cell Differentiation (GO:1901533)	1/7	0.032104	0.162234	0	0	36.0525	123.977	TMSB4X
Negative Regulation of Keratinocyte Proliferation (GO:0010839)	1/7	0.032104	0.162234	0	0	36.0525	123.977	FGFR2
Negative Regulation of Microglial Cell Activation (GO:1903979)	1/7	0.032104	0.162234	0	0	36.0525	123.977	NR1D1
UV Protection (GO:0009650)	1/7	0.032104	0.162234	0	0	36.0525	123.977	MFAP4
Negative Regulation of Vascular Associated Smooth Muscle Cell Differentiation (GO:1905064)	1/7	0.032104	0.162234	0	0	36.0525	123.977	PDCD4
Aspartate Family Amino Acid Biosynthetic Process (GO:0009067)	1/7	0.032104	0.162234	0	0	36.0525	123.977	PLOD2
Neuron Projection Arborization (GO:0140058)	1/7	0.032104	0.162234	0	0	36.0525	123.977	ROCK1
Non-Proteinogenic Amino Acid Biosynthetic Process (GO:0170043)	1/7	0.032104	0.162234	0	0	36.0525	123.977	PLOD2
Peptidyl-Lysine Hydroxylation (GO:0017185)	1/7	0.032104	0.162234	0	0	36.0525	123.977	PLOD2
Pericardium Development (GO:0060039)	1/7	0.032104	0.162234	0	0	36.0525	123.977	TBX20
Cellular Response to Leptin Stimulus (GO:0044320)	1/7	0.032104	0.162234	0	0	36.0525	123.977	NR4A3
Cellular Response to Monoamine Stimulus (GO:0071868)	1/7	0.032104	0.162234	0	0	36.0525	123.977	NR4A3
Polysaccharide Metabolic Process (GO:0005976)	1/7	0.032104	0.162234	0	0	36.0525	123.977	DDX18
Positive Regulation of ATP Biosynthetic Process (GO:2001171)	1/7	0.032104	0.162234	0	0	36.0525	123.977	TMSB4X
Response to Angiotensin (GO:1990776)	1/7	0.032104	0.162234	0	0	36.0525	123.977	ROCK1
Dolichol Metabolic Process (GO:0019348)	1/7	0.032104	0.162234	0	0	36.0525	123.977	DPM1
Elastic Fiber Assembly (GO:0048251)	1/7	0.032104	0.162234	0	0	36.0525	123.977	MFAP4
Exocrine System Development (GO:0035272)	1/7	0.032104	0.162234	0	0	36.0525	123.977	FGFR2
Positive Regulation of Phosphatase Activity (GO:0010922)	1/7	0.032104	0.162234	0	0	36.0525	123.977	ROCK1
Positive Regulation of Steroid Biosynthetic Process (GO:0010893)	1/7	0.032104	0.162234	0	0	36.0525	123.977	NR1D1
Regulation of Carbohydrate Biosynthetic Process (GO:0043255)	1/7	0.032104	0.162234	0	0	36.0525	123.977	OGT
Regulation of Cardiac Muscle Hypertrophy in Response to Stress (GO:1903242)	1/7	0.032104	0.162234	0	0	36.0525	123.977	LMNA
Mitotic Cytokinesis (GO:0000281)	2/62	0.0337728	0.166186	0	0	7.26996	24.6314	SON;ROCK1
Negative Regulation of Response to External Stimulus (GO:0032102)	3/154	0.0351339	0.166186	0	0	4.36115	14.6037	PTGIS;TMSB4X;NR1D1
CD40 Signaling Pathway (GO:0023035)	1/8	0.0366063	0.166186	0	0	30.9006	102.205	ITGA5
Regulation of Endothelial Cell Development (GO:1901550)	1/8	0.0366063	0.166186	0	0	30.9006	102.205	ROCK1
Negative Regulation of Nitric Oxide Biosynthetic Process (GO:0045019)	1/8	0.0366063	0.166186	0	0	30.9006	102.205	PTGIS
Negative Regulation of Nitric Oxide Metabolic Process (GO:1904406)	1/8	0.0366063	0.166186	0	0	30.9006	102.205	PTGIS
Regulation of miRNA Metabolic Process (GO:2000628)	1/8	0.0366063	0.166186	0	0	30.9006	102.205	DDX5
Regulation of Phosphatase Activity (GO:0010921)	1/8	0.0366063	0.166186	0	0	30.9006	102.205	ROCK1
Regulation of Phospholipase Activity (GO:0010517)	1/8	0.0366063	0.166186	0	0	30.9006	102.205	FGFR2
Regulation of Pinocytosis (GO:0048548)	1/8	0.0366063	0.166186	0	0	30.9006	102.205	AXL
Regulation of Skeletal Muscle Cell Differentiation (GO:2001014)	1/8	0.0366063	0.166186	0	0	30.9006	102.205	DDX5
Phosphatidylserine Acyl-Chain Remodeling (GO:0036150)	1/8	0.0366063	0.166186	0	0	30.9006	102.205	PLA1A
Cellular Response to Platelet-Derived Growth Factor Stimulus (GO:0036120)	1/8	0.0366063	0.166186	0	0	30.9006	102.205	DDX18
Positive Regulation of T Cell Mediated Immune Response to Tumor Cell (GO:0002842)	1/8	0.0366063	0.166186	0	0	30.9006	102.205	YWHAG
Dicarboxylic Acid Biosynthetic Process (GO:0043650)	1/8	0.0366063	0.166186	0	0	30.9006	102.205	MTHFD1L
Positive Regulation of Immune Response to Tumor Cell (GO:0002839)	1/8	0.0366063	0.166186	0	0	30.9006	102.205	YWHAG
Forebrain Neuron Development (GO:0021884)	1/8	0.0366063	0.166186	0	0	30.9006	102.205	FGFR2
Integrin Activation (GO:0033622)	1/8	0.0366063	0.166186	0	0	30.9006	102.205	KRIT1
Positive Regulation of Vascular Associated Smooth Muscle Cell Migration (GO:1904754)	1/8	0.0366063	0.166186	0	0	30.9006	102.205	NR4A3
Positive Regulation of Vesicle Fusion (GO:0031340)	1/8	0.0366063	0.166186	0	0	30.9006	102.205	ANXA2
Presynaptic Membrane Assembly (GO:0097105)	1/8	0.0366063	0.166186	0	0	30.9006	102.205	PTPRD
Protein Hexamerization (GO:0034214)	1/8	0.0366063	0.166186	0	0	30.9006	102.205	MAT2A
Negative Regulation of T Cell Cytokine Production (GO:0002725)	1/8	0.0366063	0.166186	0	0	30.9006	102.205	SMAD7
Positive Regulation of Cell Junction Assembly (GO:1901890)	2/65	0.0368184	0.166186	0	0	6.92273	22.8572	PTPRD;ROCK1
Neuron Projection Morphogenesis (GO:0048812)	3/157	0.0368771	0.166186	0	0	4.27554	14.11	TSC22D4;ROCK1;FGFR2
Protein Maturation (GO:0051604)	3/158	0.0374679	0.166258	0	0	4.24774	13.9507	TLL2;AEBP1;OGT
Chordate Embryonic Development (GO:0043009)	2/67	0.0389055	0.166258	0	0	6.70904	21.7817	SULF1;FGFR2
Cell Junction Organization (GO:0034330)	2/69	0.0410367	0.166258	0	0	6.50812	20.7823	SYN3;RHOA
DNA Topological Change (GO:0006265)	1/9	0.0410878	0.166258	0	0	27.0367	86.3023	TOP1
Golgi Lumen Acidification (GO:0061795)	1/9	0.0410878	0.166258	0	0	27.0367	86.3023	ATP6V0B
Golgi Ribbon Formation (GO:0090161)	1/9	0.0410878	0.166258	0	0	27.0367	86.3023	GOLPH3
Regulation of Hair Cycle (GO:0042634)	1/9	0.0410878	0.166258	0	0	27.0367	86.3023	PER1
NAD Biosynthesis via Nicotinamide Riboside Salvage Pathway (GO:0034356)	1/9	0.0410878	0.166258	0	0	27.0367	86.3023	PTGIS
RISC Complex Assembly (GO:0070922)	1/9	0.0410878	0.166258	0	0	27.0367	86.3023	COLEC12
Antibacterial Innate Immune Response (GO:0140367)	1/9	0.0410878	0.166258	0	0	27.0367	86.3023	SLC15A2
Response to Platelet-Derived Growth Factor (GO:0036119)	1/9	0.0410878	0.166258	0	0	27.0367	86.3023	DDX18
Positive Regulation of Cell-Cell Adhesion Mediated by Cadherin (GO:2000049)	1/9	0.0410878	0.166258	0	0	27.0367	86.3023	SMAD7
Embryonic Eye Morphogenesis (GO:0048048)	1/9	0.0410878	0.166258	0	0	27.0367	86.3023	MFAP5
Endothelial Tube Morphogenesis (GO:0061154)	1/9	0.0410878	0.166258	0	0	27.0367	86.3023	RHOA
Error-Prone Translesion Synthesis (GO:0042276)	1/9	0.0410878	0.166258	0	0	27.0367	86.3023	REV1
Positive Regulation of Mesenchymal Cell Proliferation (GO:0002053)	1/9	0.0410878	0.166258	0	0	27.0367	86.3023	FGFR2
Glucan Biosynthetic Process (GO:0009250)	1/9	0.0410878	0.166258	0	0	27.0367	86.3023	NR1D1
Glycogen Biosynthetic Process (GO:0005978)	1/9	0.0410878	0.166258	0	0	27.0367	86.3023	NR1D1
Positive Regulation of Phospholipase Activity (GO:0010518)	1/9	0.0410878	0.166258	0	0	27.0367	86.3023	FGFR2
Positive Regulation of Purine Nucleotide Biosynthetic Process (GO:1900373)	1/9	0.0410878	0.166258	0	0	27.0367	86.3023	TMSB4X
Positive Regulation of Tissue Remodeling (GO:0034105)	1/9	0.0410878	0.166258	0	0	27.0367	86.3023	ROCK1
Presynaptic Membrane Organization (GO:0097090)	1/9	0.0410878	0.166258	0	0	27.0367	86.3023	PTPRD
Morphogenesis of an Epithelial Sheet (GO:0002011)	1/9	0.0410878	0.166258	0	0	27.0367	86.3023	TBX20
Regulation of Bile Acid Biosynthetic Process (GO:0070857)	1/9	0.0410878	0.166258	0	0	27.0367	86.3023	NR1D1
Negative Regulation of T-helper Cell Differentiation (GO:0045623)	1/9	0.0410878	0.166258	0	0	27.0367	86.3023	SMAD7
Regulation of Cell-Cell Adhesion Mediated by Integrin (GO:0033632)	1/9	0.0410878	0.166258	0	0	27.0367	86.3023	DPP4
Peptidyl-Serine Phosphorylation (GO:0018105)	2/70	0.0421185	0.166258	0	0	6.41209	20.3088	ROCK1;TOP1
Heterochromatin Formation (GO:0031507)	2/73	0.0454276	0.166258	0	0	6.14023	18.9833	LMNA;MPHOSPH8
Negative Regulation of Cellular Response to Growth Factor Stimulus (GO:0090288)	2/73	0.0454276	0.166258	0	0	6.14023	18.9833	SULF1;SMAD7
NAD Biosynthetic Process via the Salvage Pathway (GO:0034355)	1/10	0.0455488	0.166258	0	0	24.0314	74.2323	PTGIS
S-adenosylmethionine Metabolic Process (GO:0046500)	1/10	0.0455488	0.166258	0	0	24.0314	74.2323	MAT2A
Negative Regulation of Smooth Muscle Cell Differentiation (GO:0051151)	1/10	0.0455488	0.166258	0	0	24.0314	74.2323	PDCD4
Atrial Septum Morphogenesis (GO:0060413)	1/10	0.0455488	0.166258	0	0	24.0314	74.2323	TBX20
Basement Membrane Organization (GO:0071711)	1/10	0.0455488	0.166258	0	0	24.0314	74.2323	FLRT2
Response to Laminar Fluid Shear Stress (GO:0034616)	1/10	0.0455488	0.166258	0	0	24.0314	74.2323	SMAD7
Positive Regulation of Actin Filament Depolymerization (GO:0030836)	1/10	0.0455488	0.166258	0	0	24.0314	74.2323	CFL2
Self Proteolysis (GO:0097264)	1/10	0.0455488	0.166258	0	0	24.0314	74.2323	CAPN7
Positive Regulation of Dendritic Spine Morphogenesis (GO:0061003)	1/10	0.0455488	0.166258	0	0	24.0314	74.2323	PTPRD
Establishment of Epithelial Cell Apical/Basal Polarity (GO:0045198)	1/10	0.0455488	0.166258	0	0	24.0314	74.2323	RHOA
Glomerular Filtration (GO:0003094)	1/10	0.0455488	0.166258	0	0	24.0314	74.2323	SULF1
Protein Localization to Nuclear Envelope (GO:0090435)	1/10	0.0455488	0.166258	0	0	24.0314	74.2323	LMNA
Mast Cell Activation Involved in Immune Response (GO:0002279)	1/10	0.0455488	0.166258	0	0	24.0314	74.2323	NR4A3
Mast Cell Degranulation (GO:0043303)	1/10	0.0455488	0.166258	0	0	24.0314	74.2323	NR4A3
Receptor-Mediated Endocytosis of Virus by Host Cell (GO:0019065)	1/10	0.0455488	0.166258	0	0	24.0314	74.2323	DPP4
Muscle Cell Migration (GO:0014812)	1/10	0.0455488	0.166258	0	0	24.0314	74.2323	ROCK1
Regulation of T-helper 17 Cell Differentiation (GO:2000319)	1/10	0.0455488	0.166258	0	0	24.0314	74.2323	SMAD7
Negative Regulation of T-helper 17 Cell Differentiation (GO:2000320)	1/10	0.0455488	0.166258	0	0	24.0314	74.2323	SMAD7
Regulation of Apoptotic Process (GO:0042981)	7/704	0.0456918	0.166258	0	0	2.24334	6.92256	DNAJA1;GOLPH3;SON;ADAMTSL4;AXL;PTMS;MCL1
Cellular Response to Cytokine Stimulus (GO:0071345)	4/289	0.0459196	0.166258	0	0	3.09434	9.53325	PTGIS;AXL;NR1D1;RHOA
Regulation of Stress Fiber Assembly (GO:0051492)	2/75	0.0476853	0.166258	0	0	5.9714	18.1718	ROCK1;RHOA
Peptidyl-Serine Modification (GO:0018209)	2/75	0.0476853	0.166258	0	0	5.9714	18.1718	ROCK1;TOP1
Plasma Membrane Organization (GO:0007009)	2/75	0.0476853	0.166258	0	0	5.9714	18.1718	COLEC12;MYOF
Positive Regulation of Secretion by Cell (GO:1903532)	2/75	0.0476853	0.166258	0	0	5.9714	18.1718	GOLPH3;ANXA2
Negative Regulation of Supramolecular Fiber Organization (GO:1902904)	2/76	0.0488294	0.166258	0	0	5.89041	17.7856	PLEKHH2;TMSB4X
Negative Regulation of Intracellular Signal Transduction (GO:1902532)	4/297	0.0498593	0.166258	0	0	3.00863	9.02152	PER1;TMSB4X;NR1D1;SMAD7
Regulation of Non-Canonical NF-kappaB Signal Transduction (GO:1901222)	2/77	0.0499834	0.166258	0	0	5.81158	17.4119	PDCD4;RHOA
Cellular Response to Hypoxia (GO:0071456)	2/77	0.0499834	0.166258	0	0	5.81158	17.4119	PTGIS;LMNA
Negative Regulation of Extracellular Matrix Organization (GO:1903054)	1/11	0.0499892	0.166258	0	0	21.6272	64.7939	DPP4
Negative Regulation of Gene Expression via Chromosomal CpG Island Methylation (GO:0044027)	1/11	0.0499892	0.166258	0	0	21.6272	64.7939	MPHOSPH8
Regulation of Establishment of Protein Localization to Mitochondrion (GO:1903747)	1/11	0.0499892	0.166258	0	0	21.6272	64.7939	DNAJA1
RNA Splicing, via Endonucleolytic Cleavage and Ligation (GO:0000394)	1/11	0.0499892	0.166258	0	0	21.6272	64.7939	COLEC12
Regulation of Mesenchymal Cell Proliferation (GO:0010464)	1/11	0.0499892	0.166258	0	0	21.6272	64.7939	FGFR2
Adherens Junction Assembly (GO:0034333)	1/11	0.0499892	0.166258	0	0	21.6272	64.7939	SMAD7
Regulation of Oxidative Stress-Induced Neuron Intrinsic Apoptotic Signaling Pathway (GO:1903376)	1/11	0.0499892	0.166258	0	0	21.6272	64.7939	MCL1
Regulation of Programmed Necrotic Cell Death (GO:0062098)	1/11	0.0499892	0.166258	0	0	21.6272	64.7939	OGT
Nicotinamide Riboside Metabolic Process (GO:0046495)	1/11	0.0499892	0.166258	0	0	21.6272	64.7939	PTGIS
Regulation of Purine Nucleotide Catabolic Process (GO:0033121)	1/11	0.0499892	0.166258	0	0	21.6272	64.7939	OGT
Regulation of Smooth Muscle Cell Differentiation (GO:0051150)	1/11	0.0499892	0.166258	0	0	21.6272	64.7939	FGFR2
Cellular Response to UV-B (GO:0071493)	1/11	0.0499892	0.166258	0	0	21.6272	64.7939	MFAP4
Polysaccharide Biosynthetic Process (GO:0000271)	1/11	0.0499892	0.166258	0	0	21.6272	64.7939	DDX18
Cellular Response to Nutrient (GO:0031670)	1/11	0.0499892	0.166258	0	0	21.6272	64.7939	MAT2A
Positive Regulation of Behavior (GO:0048520)	1/11	0.0499892	0.166258	0	0	21.6272	64.7939	NR4A3
sno(s)RNA 3'-End Processing (GO:0031126)	1/11	0.0499892	0.166258	0	0	21.6272	64.7939	FBL
Endocytosis Involved in Viral Entry Into Host Cell (GO:0075509)	1/11	0.0499892	0.166258	0	0	21.6272	64.7939	DPP4
Positive Regulation of Execution Phase of Apoptosis (GO:1900119)	1/11	0.0499892	0.166258	0	0	21.6272	64.7939	PTGIS
Endosomal Lumen Acidification (GO:0048388)	1/11	0.0499892	0.166258	0	0	21.6272	64.7939	ATP6V0B
tRNA Splicing, via Endonucleolytic Cleavage and Ligation (GO:0006388)	1/11	0.0499892	0.166258	0	0	21.6272	64.7939	COLEC12
Positive Regulation of Protein Depolymerization (GO:1901881)	1/11	0.0499892	0.166258	0	0	21.6272	64.7939	CFL2
Positive Regulation of Smooth Muscle Cell Apoptotic Process (GO:0034393)	1/11	0.0499892	0.166258	0	0	21.6272	64.7939	PDCD4
Positive Regulation of Vascular Endothelial Growth Factor Receptor Signaling Pathway (GO:0030949)	1/11	0.0499892	0.166258	0	0	21.6272	64.7939	ITGA5
Positive Regulation of Vascular Endothelial Growth Factor Signaling Pathway (GO:1900748)	1/11	0.0499892	0.166258	0	0	21.6272	64.7939	ITGA5
Mast Cell Mediated Immunity (GO:0002448)	1/11	0.0499892	0.166258	0	0	21.6272	64.7939	NR4A3
Cellular Response to Decreased Oxygen Levels (GO:0036294)	2/78	0.0511473	0.169568	0	0	5.73482	17.0499	PTGIS;LMNA
Regulation of Leukocyte Adhesion to Vascular Endothelial Cell (GO:1904994)	1/12	0.0544091	0.171636	0	0	19.6601	57.2349	RHOA
Negative Regulation of Transcription by Competitive Promoter Binding (GO:0010944)	1/12	0.0544091	0.171636	0	0	19.6601	57.2349	SMAD7
Cellular Response to Catecholamine Stimulus (GO:0071870)	1/12	0.0544091	0.171636	0	0	19.6601	57.2349	NR4A3
Regulation of Tube Diameter (GO:0035296)	1/12	0.0544091	0.171636	0	0	19.6601	57.2349	ROCK1
Renal Filtration (GO:0097205)	1/12	0.0544091	0.171636	0	0	19.6601	57.2349	SULF1
Signal Release (GO:0023061)	1/12	0.0544091	0.171636	0	0	19.6601	57.2349	KPNA4
Endothelium Development (GO:0003158)	1/12	0.0544091	0.171636	0	0	19.6601	57.2349	KRIT1
Vascular Process in Circulatory System (GO:0003018)	1/12	0.0544091	0.171636	0	0	19.6601	57.2349	ROCK1
Glial Cell-Derived Neurotrophic Factor Receptor Signaling Pathway (GO:0035860)	1/12	0.0544091	0.171636	0	0	19.6601	57.2349	SULF1
Wound Healing, Spreading of Epidermal Cells (GO:0035313)	1/12	0.0544091	0.171636	0	0	19.6601	57.2349	ITGA5
Presynapse Organization (GO:0099172)	1/12	0.0544091	0.171636	0	0	19.6601	57.2349	PTPRD
Protein Hydroxylation (GO:0018126)	1/12	0.0544091	0.171636	0	0	19.6601	57.2349	PLOD2
Regulation of ATP Biosynthetic Process (GO:2001169)	1/12	0.0544091	0.171636	0	0	19.6601	57.2349	TMSB4X
Regulation of T Cell Mediated Immune Response to Tumor Cell (GO:0002840)	1/12	0.0544091	0.171636	0	0	19.6601	57.2349	YWHAG
Muscle Tissue Development (GO:0060537)	1/12	0.0544091	0.171636	0	0	19.6601	57.2349	CSRP2
Negative Regulation of Cell Cycle Phase Transition (GO:1901988)	1/12	0.0544091	0.171636	0	0	19.6601	57.2349	TMSB4X
Regulation of Transcription by RNA Polymerase II (GO:0006357)	16/2250	0.0548647	0.172451	0	0	1.64383	4.77185	TSC22D4;DDX5;ANXA2;AEBP1;NR1D1;PTMS;SMAD7;PURB;PER1;PER3;NR4A3;TBX20;BHLHE40;ID3;OGT;FGFR2
Small GTPase-mediated Signal Transduction (GO:0007264)	3/188	0.0574068	0.172451	0	0	3.55351	10.1545	ROCK1;KRIT1;RHOA
Macromolecule Modification (GO:0043412)	2/84	0.0583308	0.172451	0	0	5.31359	15.0992	PLOD2;MAN2B1
Negative Regulation of Fibroblast Growth Factor Receptor Signaling Pathway (GO:0040037)	1/13	0.0588088	0.172451	0	0	18.0208	51.0614	SULF1
Regulation of Hematopoietic Stem Cell Differentiation (GO:1902036)	1/13	0.0588088	0.172451	0	0	18.0208	51.0614	TMSB4X
Regulation of Hemopoiesis (GO:1903706)	1/13	0.0588088	0.172451	0	0	18.0208	51.0614	PURB
Negative Regulation of Receptor Internalization (GO:0002091)	1/13	0.0588088	0.172451	0	0	18.0208	51.0614	ANXA2
Negative Regulation of Stem Cell Differentiation (GO:2000737)	1/13	0.0588088	0.172451	0	0	18.0208	51.0614	TMSB4X
Negative Regulation of Toll-Like Receptor 4 Signaling Pathway (GO:0034144)	1/13	0.0588088	0.172451	0	0	18.0208	51.0614	NR1D1
Regulation of Peroxisome Proliferator Activated Receptor Signaling Pathway (GO:0035358)	1/13	0.0588088	0.172451	0	0	18.0208	51.0614	PTGIS
Atrial Septum Development (GO:0003283)	1/13	0.0588088	0.172451	0	0	18.0208	51.0614	TBX20
Atrioventricular Valve Development (GO:0003171)	1/13	0.0588088	0.172451	0	0	18.0208	51.0614	TBX20
Cardiac Right Ventricle Morphogenesis (GO:0003215)	1/13	0.0588088	0.172451	0	0	18.0208	51.0614	TBX20
Regulation of Vascular Associated Smooth Muscle Cell Migration (GO:1904752)	1/13	0.0588088	0.172451	0	0	18.0208	51.0614	NR4A3
Regulation of Vesicle Fusion (GO:0031338)	1/13	0.0588088	0.172451	0	0	18.0208	51.0614	ANXA2
Hyaluronan Metabolic Process (GO:0030212)	1/13	0.0588088	0.172451	0	0	18.0208	51.0614	DDX18
Modified Amino Acid Biosynthetic Process (GO:0042398)	1/13	0.0588088	0.172451	0	0	18.0208	51.0614	PLOD2
Regulation of ERBB Signaling Pathway (GO:1901184)	1/13	0.0588088	0.172451	0	0	18.0208	51.0614	RHBDF1
Muscle Filament Sliding (GO:0030049)	1/13	0.0588088	0.172451	0	0	18.0208	51.0614	MYL6
Regulation of T-helper 17 Type Immune Response (GO:2000316)	1/13	0.0588088	0.172451	0	0	18.0208	51.0614	SMAD7
Regulation of Actomyosin Structure Organization (GO:0110020)	1/13	0.0588088	0.172451	0	0	18.0208	51.0614	ROCK1
Regulation of Carbohydrate Catabolic Process (GO:0043470)	1/13	0.0588088	0.172451	0	0	18.0208	51.0614	OGT
Regulation of Cell Fate Commitment (GO:0010453)	1/13	0.0588088	0.172451	0	0	18.0208	51.0614	CHD4
Negative Regulation of Cardiac Muscle Hypertrophy (GO:0010614)	1/13	0.0588088	0.172451	0	0	18.0208	51.0614	LMNA
Negative Regulation of Cell Activation (GO:0050866)	1/13	0.0588088	0.172451	0	0	18.0208	51.0614	NR1D1
Negative Regulation of Transforming Growth Factor Beta Receptor Signaling Pathway (GO:0030512)	2/85	0.0595604	0.174164	0	0	5.2493	14.807	OGT;SMAD7
Integrin-Mediated Signaling Pathway (GO:0007229)	2/86	0.060799	0.17448	0	0	5.18655	14.5233	ILK;ITGA5
Regulation of Endothelial Cell Proliferation (GO:0001936)	2/87	0.0620464	0.17448	0	0	5.12527	14.2476	KRIT1;SULF1
Regulation of Dephosphorylation (GO:0035303)	1/14	0.0631881	0.17448	0	0	16.6338	45.9365	ROCK1
Regulation of Establishment of Protein Localization (GO:0070201)	1/14	0.0631881	0.17448	0	0	16.6338	45.9365	DNAJA1
Regulation of Extracellular Matrix Disassembly (GO:0010715)	1/14	0.0631881	0.17448	0	0	16.6338	45.9365	DPP4
Regulation of Feeding Behavior (GO:0060259)	1/14	0.0631881	0.17448	0	0	16.6338	45.9365	NR4A3
Negative Regulation of Neuroinflammatory Response (GO:0150079)	1/14	0.0631881	0.17448	0	0	16.6338	45.9365	NR1D1
Bone Morphogenesis (GO:0060349)	1/14	0.0631881	0.17448	0	0	16.6338	45.9365	FGFR2
Cellular Response to Exogenous dsRNA (GO:0071360)	1/14	0.0631881	0.17448	0	0	16.6338	45.9365	COLEC12
Polarized Epithelial Cell Differentiation (GO:0030859)	1/14	0.0631881	0.17448	0	0	16.6338	45.9365	RHOA
Response to Chemokine (GO:1990868)	1/14	0.0631881	0.17448	0	0	16.6338	45.9365	RHOA
Response to Interleukin-6 (GO:0070741)	1/14	0.0631881	0.17448	0	0	16.6338	45.9365	PTGIS
Smooth Muscle Contraction (GO:0006939)	1/14	0.0631881	0.17448	0	0	16.6338	45.9365	ROCK1
Positive Regulation of Endothelial Cell Chemotaxis (GO:2001028)	1/14	0.0631881	0.17448	0	0	16.6338	45.9365	TMSB4X
Endoderm Development (GO:0007492)	1/14	0.0631881	0.17448	0	0	16.6338	45.9365	TBX20
Epiboly Involved in Wound Healing (GO:0090505)	1/14	0.0631881	0.17448	0	0	16.6338	45.9365	RHOA
Establishment of Apical/Basal Cell Polarity (GO:0035089)	1/14	0.0631881	0.17448	0	0	16.6338	45.9365	RHOA
Extrinsic Apoptotic Signaling Pathway in Absence of Ligand (GO:0097192)	1/14	0.0631881	0.17448	0	0	16.6338	45.9365	MCL1
Positive Regulation of Response to Cytokine Stimulus (GO:0060760)	1/14	0.0631881	0.17448	0	0	16.6338	45.9365	AXL
miRNA Metabolic Process (GO:0010586)	1/14	0.0631881	0.17448	0	0	16.6338	45.9365	DDX5
Negative Regulation of Cell Migration Involved in Sprouting Angiogenesis (GO:0090051)	1/14	0.0631881	0.17448	0	0	16.6338	45.9365	RHOA
Endomembrane System Organization (GO:0010256)	3/196	0.0634239	0.174667	0	0	3.40484	9.39025	RAB30;GOLPH3;LMNA
Positive Regulation of Canonical Wnt Signaling Pathway (GO:0090263)	2/89	0.0645674	0.177347	0	0	5.00695	13.7193	ILK;FGFR2
Establishment of Protein Localization to Organelle (GO:0072594)	2/90	0.0658407	0.177568	0	0	4.9498	13.466	GOLPH3;KPNA4
Mitotic Spindle Organization (GO:0007052)	2/90	0.0658407	0.177568	0	0	4.9498	13.466	ILK;RHOA
Arp2/3 Complex-Mediated Actin Nucleation (GO:0034314)	1/15	0.0675474	0.177568	0	0	15.4449	41.6228	ARPC1B
Negative Regulation of Establishment of Protein Localization (GO:1904950)	1/15	0.0675474	0.177568	0	0	15.4449	41.6228	DNAJA1
Regulation of Execution Phase of Apoptosis (GO:1900117)	1/15	0.0675474	0.177568	0	0	15.4449	41.6228	PTGIS
Negative Regulation of Macrophage Activation (GO:0043031)	1/15	0.0675474	0.177568	0	0	15.4449	41.6228	NR1D1
Actin-Myosin Filament Sliding (GO:0033275)	1/15	0.0675474	0.177568	0	0	15.4449	41.6228	MYL6
Regulation of Microglial Cell Activation (GO:1903978)	1/15	0.0675474	0.177568	0	0	15.4449	41.6228	NR1D1
Digestive System Development (GO:0055123)	1/15	0.0675474	0.177568	0	0	15.4449	41.6228	FGFR2
Unsaturated Fatty Acid Biosynthetic Process (GO:0006636)	1/15	0.0675474	0.177568	0	0	15.4449	41.6228	PTGIS
Folic Acid-Containing Compound Metabolic Process (GO:0006760)	1/15	0.0675474	0.177568	0	0	15.4449	41.6228	MTHFD1L
Positive Regulation of Transmembrane Transport (GO:0034764)	1/15	0.0675474	0.177568	0	0	15.4449	41.6228	NR4A3
Prostaglandin Biosynthetic Process (GO:0001516)	1/15	0.0675474	0.177568	0	0	15.4449	41.6228	PTGIS
Maturation of LSU-rRNA Frm Tricistronic rRNA Trnscpt (GO:0000463)	1/15	0.0675474	0.177568	0	0	15.4449	41.6228	DDX18
Regulation of ATP Metabolic Process (GO:1903578)	1/15	0.0675474	0.177568	0	0	15.4449	41.6228	OGT
Regulation of Amyloid-Beta Clearance (GO:1900221)	1/15	0.0675474	0.177568	0	0	15.4449	41.6228	ROCK1
Regulation of Cell Fate Specification (GO:0042659)	1/15	0.0675474	0.177568	0	0	15.4449	41.6228	CHD4
Regulation of Osteoblast Differentiation (GO:0045667)	2/92	0.0684125	0.178938	0	0	4.83932	12.98	DDX5;FGFR2
Glucose Homeostasis (GO:0042593)	2/92	0.0684125	0.178938	0	0	4.83932	12.98	TSC22D4;NR1D1
Regulation of DNA-templated Transcription (GO:0006355)	15/2139	0.0686701	0.179162	0	0	1.61008	4.3125	TSC22D4;DDX5;ILK;CHD4;AEBP1;NR1D1;SMAD7;PURB;PER1;NR4A3;TBX20;BHLHE40;PDCD4;ID3;OGT
Positive Regulation of DNA-templated Transcription (GO:0045893)	10/1274	0.0716442	0.180758	0	0	1.77701	4.68428	PURB;PER1;NR4A3;ANXA2;ILK;CHD4;NR1D1;OGT;FGFR2;PTMS
Negative Regulation of Cytokine Production Involved in Immune Response (GO:0002719)	1/16	0.0718865	0.180758	0	0	14.4145	37.9486	SMAD7
Regulation of Establishment of Endothelial Barrier (GO:1903140)	1/16	0.0718865	0.180758	0	0	14.4145	37.9486	ROCK1
Regulation of Viral Life Cycle (GO:1903900)	1/16	0.0718865	0.180758	0	0	14.4145	37.9486	AXL
Response to UV-B (GO:0010224)	1/16	0.0718865	0.180758	0	0	14.4145	37.9486	MFAP4
Positive Regulation of DNA Damage Response, Signal Transduction by P53 Class Mediator (GO:0043517)	1/16	0.0718865	0.180758	0	0	14.4145	37.9486	DDX5
Digestive Tract Morphogenesis (GO:0048546)	1/16	0.0718865	0.180758	0	0	14.4145	37.9486	FGFR2
Embryonic Heart Tube Development (GO:0035050)	1/16	0.0718865	0.180758	0	0	14.4145	37.9486	TBX20
+ Reg of Myeloid Leukocyte Cytokine Production Inv in Imm Resp (GO:0061081)	1/16	0.0718865	0.180758	0	0	14.4145	37.9486	NR4A3
Presynapse Assembly (GO:0099054)	1/16	0.0718865	0.180758	0	0	14.4145	37.9486	PTPRD
Protein O-linked Mannosylation (GO:0035269)	1/16	0.0718865	0.180758	0	0	14.4145	37.9486	DPM1
Mesenchyme Morphogenesis (GO:0072132)	1/16	0.0718865	0.180758	0	0	14.4145	37.9486	TBX20
Mesonephric Tubule Development (GO:0072164)	1/16	0.0718865	0.180758	0	0	14.4145	37.9486	FGFR2
Negative Regulation of Activin Receptor Signaling Pathway (GO:0032926)	1/16	0.0718865	0.180758	0	0	14.4145	37.9486	SMAD7
Negative Regulation of Amyloid-Beta Formation (GO:1902430)	1/16	0.0718865	0.180758	0	0	14.4145	37.9486	ROCK1
Supramolecular Fiber Organization (GO:0097435)	4/339	0.0734899	0.180982	0	0	2.62579	6.85491	MFAP4;TLL2;PLOD2;RHOA
Regulation of Actin Filament-Based Process (GO:0032970)	2/96	0.0736538	0.180982	0	0	4.63245	12.0832	ROCK1;RHOA
DNA Conformation Change (GO:0071103)	1/17	0.0762057	0.180982	0	0	13.5129	34.7865	TOP1
Regulation of Endothelial Cell Chemotaxis (GO:2001026)	1/17	0.0762057	0.180982	0	0	13.5129	34.7865	TMSB4X
Negative Regulation of Vascular Associated Smooth Muscle Cell Proliferation (GO:1904706)	1/17	0.0762057	0.180982	0	0	13.5129	34.7865	PDCD4
Carbohydrate Derivative Transport (GO:1901264)	1/17	0.0762057	0.180982	0	0	13.5129	34.7865	SLC15A2
Cellular Response to dsRNA (GO:0071359)	1/17	0.0762057	0.180982	0	0	13.5129	34.7865	COLEC12
Platelet-Derived Growth Factor Receptor Signaling Pathway (GO:0048008)	1/17	0.0762057	0.180982	0	0	13.5129	34.7865	NR4A3
Release of Cytochrome C From Mitochondria (GO:0001836)	1/17	0.0762057	0.180982	0	0	13.5129	34.7865	MCL1
Contractile Actin Filament Bundle Assembly (GO:0030038)	1/17	0.0762057	0.180982	0	0	13.5129	34.7865	RHOA
Cortical Actin Cytoskeleton Organization (GO:0030866)	1/17	0.0762057	0.180982	0	0	13.5129	34.7865	ROCK1
Positive Regulation of Dendrite Morphogenesis (GO:0050775)	1/17	0.0762057	0.180982	0	0	13.5129	34.7865	PTPRD
Stress Fiber Assembly (GO:0043149)	1/17	0.0762057	0.180982	0	0	13.5129	34.7865	RHOA
Synaptic Membrane Adhesion (GO:0099560)	1/17	0.0762057	0.180982	0	0	13.5129	34.7865	PTPRD
Epithelial Cell Migration (GO:0010631)	1/17	0.0762057	0.180982	0	0	13.5129	34.7865	ROCK1
Positive Regulation of Leukocyte Adhesion to Vascular Endothelial Cell (GO:1904996)	1/17	0.0762057	0.180982	0	0	13.5129	34.7865	RHOA
Gastrulation (GO:0007369)	1/17	0.0762057	0.180982	0	0	13.5129	34.7865	NR4A3
Positive Regulation of Smooth Muscle Cell Migration (GO:0014911)	1/17	0.0762057	0.180982	0	0	13.5129	34.7865	NR4A3
Prostanoid Biosynthetic Process (GO:0046457)	1/17	0.0762057	0.180982	0	0	13.5129	34.7865	PTGIS
Protein Mannosylation (GO:0035268)	1/17	0.0762057	0.180982	0	0	13.5129	34.7865	DPM1
Regulation of D-glucose Transmembrane Transport (GO:0010827)	1/17	0.0762057	0.180982	0	0	13.5129	34.7865	NR4A3
Muscle Tissue Morphogenesis (GO:0060415)	1/17	0.0762057	0.180982	0	0	13.5129	34.7865	TBX20
Negative Regulation of T Cell Mediated Immunity (GO:0002710)	1/17	0.0762057	0.180982	0	0	13.5129	34.7865	SMAD7
Negative Regulation of Amyloid Precursor Protein Catabolic Process (GO:1902992)	1/17	0.0762057	0.180982	0	0	13.5129	34.7865	ROCK1
Positive Regulation of Hydrolase Activity (GO:0051345)	2/98	0.0763217	0.180982	0	0	4.53549	11.6689	ROCK1;RHOA
Regulation of Protein Secretion (GO:0050708)	2/99	0.0776671	0.181791	0	0	4.4885	11.4696	RHBDF1;GOLPH3
Response to UV (GO:0009411)	2/100	0.0790201	0.181791	0	0	4.44248	11.2752	MFAP4;REV1
Cell Junction Assembly (GO:0034329)	2/101	0.0803804	0.181791	0	0	4.39738	11.0857	TLN1;RHOA
Regulation of Cytoplasmic Pattern Recognition Receptor Signaling Pathway (GO:0039531)	1/18	0.080505	0.181791	0	0	12.7174	32.0407	SLC15A2
Regulation of Epidermal Cell Differentiation (GO:0045604)	1/18	0.080505	0.181791	0	0	12.7174	32.0407	ROCK1
NLS-bearing Protein Import Into Nucleus (GO:0006607)	1/18	0.080505	0.181791	0	0	12.7174	32.0407	KPNA4
SMAD Protein Signal Transduction (GO:0060395)	1/18	0.080505	0.181791	0	0	12.7174	32.0407	SMAD7
Negative Regulation of Reproductive Process (GO:2000242)	1/18	0.080505	0.181791	0	0	12.7174	32.0407	SULF1
Androgen Receptor Signaling Pathway (GO:0030521)	1/18	0.080505	0.181791	0	0	12.7174	32.0407	DDX5
Regulation of Neurotransmitter Transport (GO:0051588)	1/18	0.080505	0.181791	0	0	12.7174	32.0407	MYOF
Cardiac Atrium Morphogenesis (GO:0003209)	1/18	0.080505	0.181791	0	0	12.7174	32.0407	TBX20
Positive Regulation of Focal Adhesion Assembly (GO:0051894)	1/18	0.080505	0.181791	0	0	12.7174	32.0407	ROCK1
Estrogen Receptor Signaling Pathway (GO:0030520)	1/18	0.080505	0.181791	0	0	12.7174	32.0407	DDX5
Positive Regulation of Lymphocyte Migration (GO:2000403)	1/18	0.080505	0.181791	0	0	12.7174	32.0407	RHOA
Transposable Element Silencing by Heterochromatin Formation (GO:0141005)	1/18	0.080505	0.181791	0	0	12.7174	32.0407	MPHOSPH8
Ureteric Bud Development (GO:0001657)	1/18	0.080505	0.181791	0	0	12.7174	32.0407	FGFR2
Positive Regulation of Sprouting Angiogenesis (GO:1903672)	1/18	0.080505	0.181791	0	0	12.7174	32.0407	ITGA5
Mesenchyme Development (GO:0060485)	1/18	0.080505	0.181791	0	0	12.7174	32.0407	FGFR2
rRNA Modification (GO:0000154)	1/18	0.080505	0.181791	0	0	12.7174	32.0407	FBL
Regulation of Activin Receptor Signaling Pathway (GO:0032925)	1/18	0.080505	0.181791	0	0	12.7174	32.0407	SMAD7
Regulation of Amyloid Precursor Protein Catabolic Process (GO:1902991)	1/18	0.080505	0.181791	0	0	12.7174	32.0407	ROCK1
Regulation of Bicellular Tight Junction Assembly (GO:2000810)	1/18	0.080505	0.181791	0	0	12.7174	32.0407	ROCK1
Regulation of RNA Splicing (GO:0043484)	2/104	0.0845051	0.183113	0	0	4.2674	10.5445	SON;AHNAK2
Regulation of Actin Cytoskeleton Organization (GO:0032956)	2/104	0.0845051	0.183113	0	0	4.2674	10.5445	ROCK1;RHOA
Negative Regulation of Inflammasome-Mediated Signaling Pathway (GO:0141086)	1/19	0.0847845	0.183113	0	0	12.0103	29.637	OGT
Actin Nucleation (GO:0045010)	1/19	0.0847845	0.183113	0	0	12.0103	29.637	ARPC1B
Negative Regulation of Stem Cell Population Maintenance (GO:1902455)	1/19	0.0847845	0.183113	0	0	12.0103	29.637	OGT
Nuclear Envelope Organization (GO:0006998)	1/19	0.0847845	0.183113	0	0	12.0103	29.637	LMNA
Nuclear Migration (GO:0007097)	1/19	0.0847845	0.183113	0	0	12.0103	29.637	LMNA
cGMP-mediated Signaling (GO:0019934)	1/19	0.0847845	0.183113	0	0	12.0103	29.637	GUCY1A2
Cardiac Epithelial to Mesenchymal Transition (GO:0060317)	1/19	0.0847845	0.183113	0	0	12.0103	29.637	PDCD4
Pore Complex Assembly (GO:0046931)	1/19	0.0847845	0.183113	0	0	12.0103	29.637	AHCTF1
Response to Interferon-Alpha (GO:0035455)	1/19	0.0847845	0.183113	0	0	12.0103	29.637	AXL
Signaling Receptor Ligand Precursor Processing (GO:0140448)	1/19	0.0847845	0.183113	0	0	12.0103	29.637	DPP4
Embryonic Digestive Tract Development (GO:0048566)	1/19	0.0847845	0.183113	0	0	12.0103	29.637	FGFR2
Positive Regulation of Endothelial Cell Apoptotic Process (GO:2000353)	1/19	0.0847845	0.183113	0	0	12.0103	29.637	PDCD4
Protein Localization to Mitochondrion (GO:0070585)	1/19	0.0847845	0.183113	0	0	12.0103	29.637	DNAJA1
Pulmonary Valve Morphogenesis (GO:0003184)	1/19	0.0847845	0.183113	0	0	12.0103	29.637	TBX20
Mitochondrial Fusion (GO:0008053)	1/19	0.0847845	0.183113	0	0	12.0103	29.637	MCL1
rRNA Methylation (GO:0031167)	1/19	0.0847845	0.183113	0	0	12.0103	29.637	FBL
Regulation of Rac Protein Signal Transduction (GO:0035020)	1/19	0.0847845	0.183113	0	0	12.0103	29.637	OGT
Regulation of Behavior (GO:0050795)	1/19	0.0847845	0.183113	0	0	12.0103	29.637	NR1D1
Negative Regulation of Actin Filament Polymerization (GO:0030837)	1/19	0.0847845	0.183113	0	0	12.0103	29.637	TMSB4X
Positive Regulation of Transcription by RNA Polymerase II (GO:0045944)	8/983	0.0868031	0.18539	0	0	1.82752	4.46667	PURB;PER1;NR4A3;ANXA2;NR1D1;OGT;FGFR2;PTMS
mRNA Processing (GO:0006397)	3/226	0.0884202	0.18539	0	0	2.9423	7.13701	COLEC12;DDX5;SON
Cell-Matrix Adhesion (GO:0007160)	2/107	0.088693	0.18539	0	0	4.14485	10.0412	ILK;ITGA5
Regulation of Fibroblast Migration (GO:0010762)	1/20	0.0890443	0.18539	0	0	11.3776	27.518	DDX18
Alternative mRNA Splicing, via Spliceosome (GO:0000380)	1/20	0.0890443	0.18539	0	0	11.3776	27.518	DDX5
Regulation of Necroptotic Process (GO:0060544)	1/20	0.0890443	0.18539	0	0	11.3776	27.518	OGT
Regulation of Synaptic Transmission, GABAergic (GO:0032228)	1/20	0.0890443	0.18539	0	0	11.3776	27.518	SYN3
Phosphatidylserine Metabolic Process (GO:0006658)	1/20	0.0890443	0.18539	0	0	11.3776	27.518	PLA1A
Dolichol-Linked Oligosaccharide Biosynthetic Process (GO:0006488)	1/20	0.0890443	0.18539	0	0	11.3776	27.518	DPM1
Endocardial Cushion Morphogenesis (GO:0003203)	1/20	0.0890443	0.18539	0	0	11.3776	27.518	TBX20
Xenobiotic Transport (GO:0042908)	1/20	0.0890443	0.18539	0	0	11.3776	27.518	SLC15A2
Glycogen Metabolic Process (GO:0005977)	1/20	0.0890443	0.18539	0	0	11.3776	27.518	NR1D1
Positive Regulation of Protein Processing (GO:0010954)	1/20	0.0890443	0.18539	0	0	11.3776	27.518	ANXA2
Lysosomal Lumen Acidification (GO:0007042)	1/20	0.0890443	0.18539	0	0	11.3776	27.518	ATP6V0B
Protein Heterooligomerization (GO:0051291)	1/20	0.0890443	0.18539	0	0	11.3776	27.518	MAT2A
Mesoderm Formation (GO:0001707)	1/20	0.0890443	0.18539	0	0	11.3776	27.518	TBX20
Regulation of T Cell Cytokine Production (GO:0002724)	1/20	0.0890443	0.18539	0	0	11.3776	27.518	SMAD7
Regulation of Cell-Cell Adhesion Mediated by Cadherin (GO:2000047)	1/20	0.0890443	0.18539	0	0	11.3776	27.518	SMAD7
Regulation of Proteasomal Ubiquitin-Dependent Protein Catabolic Process (GO:0032434)	2/109	0.0915189	0.189666	0	0	4.06696	9.72496	OGT;SMAD7
Regulation of Autophagy (GO:0010506)	3/230	0.0920268	0.189666	0	0	2.88987	6.89429	ATP6V0B;ROCK1;MCL1
Negative Regulation of Gene Expression, Epigenetic (GO:0045814)	2/110	0.0929418	0.189666	0	0	4.0291	9.57226	LMNA;MPHOSPH8
Regulation of Fibroblast Growth Factor Receptor Signaling Pathway (GO:0040036)	1/21	0.0932844	0.189666	0	0	10.8082	25.638	SULF1
Regulation of Generation of Precursor Metabolites and Energy (GO:0043467)	1/21	0.0932844	0.189666	0	0	10.8082	25.638	OGT
Regulation of Membrane Depolarization (GO:0003254)	1/21	0.0932844	0.189666	0	0	10.8082	25.638	SMAD7
Regulation of Neuroinflammatory Response (GO:0150077)	1/21	0.0932844	0.189666	0	0	10.8082	25.638	NR1D1
Plasma Membrane Repair (GO:0001778)	1/21	0.0932844	0.189666	0	0	10.8082	25.638	MYOF
Positive Regulation of Vascular Associated Smooth Muscle Cell Proliferation (GO:1904707)	1/21	0.0932844	0.189666	0	0	10.8082	25.638	NR4A3
Myoblast Differentiation (GO:0045445)	1/21	0.0932844	0.189666	0	0	10.8082	25.638	DDX5
Negative Regulation of Amide Metabolic Process (GO:0034249)	1/21	0.0932844	0.189666	0	0	10.8082	25.638	ROCK1
Negative Regulation of Biomineral Tissue Development (GO:0070168)	1/21	0.0932844	0.189666	0	0	10.8082	25.638	ROCK1
Negative Regulation of Developmental Process (GO:0051093)	2/111	0.0943711	0.191502	0	0	3.99193	9.42304	ROCK1;OGT
Regulation of Wnt Signaling Pathway (GO:0030111)	2/112	0.0958069	0.194037	0	0	3.95544	9.27718	SULF1;FGFR2
Regulation of Protein Ubiquitination (GO:0031396)	2/113	0.0972489	0.194823	0	0	3.91961	9.13458	DNAJA1;OGT
Fc-epsilon Receptor Signaling Pathway (GO:0038095)	1/22	0.0975051	0.194823	0	0	10.293	23.9605	NR4A3
Renal Absorption (GO:0070293)	1/22	0.0975051	0.194823	0	0	10.293	23.9605	SLC15A2
Endocardial Cushion Development (GO:0003197)	1/22	0.0975051	0.194823	0	0	10.293	23.9605	TBX20
Heparan Sulfate Proteoglycan Metabolic Process (GO:0030201)	1/22	0.0975051	0.194823	0	0	10.293	23.9605	SULF1
Post-Transcriptional Gene Silencing (GO:0016441)	1/22	0.0975051	0.194823	0	0	10.293	23.9605	COLEC12
Negative Regulation of SMAD Protein Signal Transduction (GO:0060392)	1/22	0.0975051	0.194823	0	0	10.293	23.9605	SMAD7
Intrinsic Apoptotic Signaling Pathway (GO:0097193)	2/115	0.100152	0.198583	0	0	3.84985	8.85878	DDX5;MCL1
RNA Destabilization (GO:0050779)	1/23	0.101706	0.198583	0	0	9.8246	22.4558	ROCK1
Artery Development (GO:0060840)	1/23	0.101706	0.198583	0	0	9.8246	22.4558	SMAD7
Cellular Response to Interleukin-6 (GO:0071354)	1/23	0.101706	0.198583	0	0	9.8246	22.4558	PTGIS
Positive Regulation of Cell-Substrate Junction Organization (GO:0150117)	1/23	0.101706	0.198583	0	0	9.8246	22.4558	ROCK1
Positive Regulation of Dendritic Spine Development (GO:0060999)	1/23	0.101706	0.198583	0	0	9.8246	22.4558	PTPRD
Eye Morphogenesis (GO:0048592)	1/23	0.101706	0.198583	0	0	9.8246	22.4558	MFAP5
Translesion Synthesis (GO:0019985)	1/23	0.101706	0.198583	0	0	9.8246	22.4558	REV1
Positive Regulation of Phosphate Metabolic Process (GO:0045937)	1/23	0.101706	0.198583	0	0	9.8246	22.4558	ROCK1
Prostanoid Metabolic Process (GO:0006692)	1/23	0.101706	0.198583	0	0	9.8246	22.4558	PTGIS
Maturation of LSU-rRNA (GO:0000470)	1/23	0.101706	0.198583	0	0	9.8246	22.4558	DDX18
Negative Regulation of Cell Junction Assembly (GO:1901889)	1/23	0.101706	0.198583	0	0	9.8246	22.4558	ROCK1
Gene Expression (GO:0010467)	4/381	0.101867	0.198583	0	0	2.32826	5.31795	GOLPH3;HNRNPDL;KPNA4;RPL10A
Modulation of Chemical Synaptic Transmission (GO:0050804)	2/117	0.103078	0.200569	0	0	3.78251	8.59487	MYOF;SYN3
Negative Regulation of Multicellular Organismal Process (GO:0051241)	3/243	0.104161	0.201149	0	0	2.73153	6.17822	NR1D1;OGT;SMAD7
Positive Regulation of Epithelial Cell Proliferation (GO:0050679)	2/118	0.104551	0.201149	0	0	3.74972	8.46717	NR4A3;FGFR2
Negative Regulation of Extrinsic Apoptotic Signaling Pathway in Absence of Ligand (GO:2001240)	1/24	0.105888	0.201149	0	0	9.39698	21.0997	MCL1
Fc Receptor Mediated Stimulatory Signaling Pathway (GO:0002431)	1/24	0.105888	0.201149	0	0	9.39698	21.0997	NR4A3
Regulation of Intracellular Steroid Hormone Receptor Signaling Pathway (GO:0033143)	1/24	0.105888	0.201149	0	0	9.39698	21.0997	DDX5
Negative Regulation of Receptor-Mediated Endocytosis (GO:0048261)	1/24	0.105888	0.201149	0	0	9.39698	21.0997	ANXA2
Negative Regulation of Signal Transduction in Absence of Ligand (GO:1901099)	1/24	0.105888	0.201149	0	0	9.39698	21.0997	MCL1
Aminoglycan Biosynthetic Process (GO:0006023)	1/24	0.105888	0.201149	0	0	9.39698	21.0997	DDX18
cAMP-mediated Signaling (GO:0019933)	1/24	0.105888	0.201149	0	0	9.39698	21.0997	PDE7B
Positive Regulation of Cell Communication (GO:0010647)	1/24	0.105888	0.201149	0	0	9.39698	21.0997	ILK
Ear Morphogenesis (GO:0042471)	1/24	0.105888	0.201149	0	0	9.39698	21.0997	FGFR2
Mitotic Cytokinetic Process (GO:1902410)	1/24	0.105888	0.201149	0	0	9.39698	21.0997	RHOA
Regulation of Cellular Response to Growth Factor Stimulus (GO:0090287)	1/24	0.105888	0.201149	0	0	9.39698	21.0997	SULF1
Regulation of Transforming Growth Factor Beta Receptor Signaling Pathway (GO:0017015)	2/120	0.107512	0.203486	0	0	3.68579	8.21986	OGT;SMAD7
Positive Regulation of Programmed Cell Death (GO:0043068)	3/248	0.108989	0.203486	0	0	2.6751	5.92938	DNAJA1;ADAMTSL4;MCL1
Enzyme-Linked Receptor Protein Signaling Pathway (GO:0007167)	2/121	0.109002	0.203486	0	0	3.65463	8.10009	PTPRD;AXL
Negative Regulation of Protein Depolymerization (GO:1901880)	1/25	0.110051	0.203486	0	0	9.00498	19.8723	PLEKHH2
Regulation of Membrane Protein Ectodomain Proteolysis (GO:0051043)	1/25	0.110051	0.203486	0	0	9.00498	19.8723	ROCK1
Regulation of Muscle Cell Differentiation (GO:0051147)	1/25	0.110051	0.203486	0	0	9.00498	19.8723	FGFR2
Cell Surface Receptor Protein Serine/Threonine Kinase Signaling Pathway (GO:0007178)	1/25	0.110051	0.203486	0	0	9.00498	19.8723	SMAD7
Regulation of Vascular Endothelial Growth Factor Signaling Pathway (GO:1900746)	1/25	0.110051	0.203486	0	0	9.00498	19.8723	ITGA5
Stress Granule Assembly (GO:0034063)	1/25	0.110051	0.203486	0	0	9.00498	19.8723	ATXN2L
Glycosaminoglycan Biosynthetic Process (GO:0006024)	1/25	0.110051	0.203486	0	0	9.00498	19.8723	DDX18
Icosanoid Biosynthetic Process (GO:0046456)	1/25	0.110051	0.203486	0	0	9.00498	19.8723	PTGIS
Lamellipodium Assembly (GO:0030032)	1/25	0.110051	0.203486	0	0	9.00498	19.8723	GOLPH3
Negative Chemotaxis (GO:0050919)	1/25	0.110051	0.203486	0	0	9.00498	19.8723	RHOA
Regulation of Biomineral Tissue Development (GO:0070167)	1/25	0.110051	0.203486	0	0	9.00498	19.8723	ROCK1
Regulation of Cell Junction Assembly (GO:1901888)	1/25	0.110051	0.203486	0	0	9.00498	19.8723	ROCK1
- Reg of Transmembrane Receptor Prot Serine/Threonine Kinase Sgnlng Pway (GO:0090101)	2/122	0.110497	0.203949	0	0	3.62399	7.98282	OGT;SMAD7
Response to Cytokine (GO:0034097)	2/123	0.111997	0.205668	0	0	3.59386	7.86798	RHOA;MCL1
Negative Regulation of Endothelial Cell Apoptotic Process (GO:2000352)	1/26	0.114194	0.205668	0	0	8.64435	18.757	KRIT1
GPI Anchor Biosynthetic Process (GO:0006506)	1/26	0.114194	0.205668	0	0	8.64435	18.757	DPM1
GPI Anchor Metabolic Process (GO:0006505)	1/26	0.114194	0.205668	0	0	8.64435	18.757	DPM1
Regulation of Neutrophil Chemotaxis (GO:0090022)	1/26	0.114194	0.205668	0	0	8.64435	18.757	DPP4
Regulation of Vascular Endothelial Growth Factor Receptor Signaling Pathway (GO:0030947)	1/26	0.114194	0.205668	0	0	8.64435	18.757	ITGA5
Respiratory Tube Development (GO:0030323)	1/26	0.114194	0.205668	0	0	8.64435	18.757	FGFR2
Positive Regulation of T Cell Migration (GO:2000406)	1/26	0.114194	0.205668	0	0	8.64435	18.757	RHOA
Transposable Element Silencing (GO:0010526)	1/26	0.114194	0.205668	0	0	8.64435	18.757	MPHOSPH8
Proteoglycan Metabolic Process (GO:0006029)	1/26	0.114194	0.205668	0	0	8.64435	18.757	SULF1
Regulation of T Cell Migration (GO:2000404)	1/26	0.114194	0.205668	0	0	8.64435	18.757	RHOA
Myeloid Cell Development (GO:0061515)	1/26	0.114194	0.205668	0	0	8.64435	18.757	ANXA2
Regulation of Actin Filament Bundle Assembly (GO:0032231)	1/26	0.114194	0.205668	0	0	8.64435	18.757	ROCK1
Regulation of Cell Size (GO:0008361)	1/26	0.114194	0.205668	0	0	8.64435	18.757	RHOA
Positive Regulation of Angiogenesis (GO:0045766)	2/126	0.11653	0.208762	0	0	3.50638	7.53734	PTGIS;ITGA5
Protein Localization to Nucleus (GO:0034504)	2/127	0.118051	0.208762	0	0	3.47815	7.43154	LMNA;KPNA4
Regulation of Anatomical Structure Morphogenesis (GO:0022603)	2/127	0.118051	0.208762	0	0	3.47815	7.43154	KRIT1;FGFR2
Regulation of Keratinocyte Proliferation (GO:0010837)	1/27	0.118319	0.208762	0	0	8.31145	17.7398	FGFR2
Regulation of Lysosomal Lumen pH (GO:0035751)	1/27	0.118319	0.208762	0	0	8.31145	17.7398	ATP6V0B
Wnt Signaling Pathway, Planar Cell Polarity Pathway (GO:0060071)	1/27	0.118319	0.208762	0	0	8.31145	17.7398	RHOA
Regulation of Myeloid Cell Differentiation (GO:0045637)	1/27	0.118319	0.208762	0	0	8.31145	17.7398	PURB
Regulation of Proteolysis Involved in Protein Catabolic Process (GO:1903050)	1/27	0.118319	0.208762	0	0	8.31145	17.7398	RHBDF1
Plasma Membrane Invagination (GO:0099024)	1/27	0.118319	0.208762	0	0	8.31145	17.7398	RHOA
in Utero Embryonic Development (GO:0001701)	1/27	0.118319	0.208762	0	0	8.31145	17.7398	FGFR2
Positive Regulation of Vascular Endothelial Growth Factor Production (GO:0010575)	1/27	0.118319	0.208762	0	0	8.31145	17.7398	SULF1
mRNA 3'-End Processing (GO:0031124)	1/27	0.118319	0.208762	0	0	8.31145	17.7398	COLEC12
Golgi Organization (GO:0007030)	2/128	0.119578	0.209611	0	0	3.45038	7.32786	RAB30;GOLPH3
Regulation of MAPK Cascade (GO:0043408)	3/260	0.120924	0.209611	0	0	2.54864	5.38423	PER1;ROCK1;FGFR2
Regulation of Extrinsic Apoptotic Signaling Pathway in Absence of Ligand (GO:2001239)	1/28	0.122424	0.209611	0	0	8.00322	16.8089	MCL1
Regulation of Glucose Metabolic Process (GO:0010906)	1/28	0.122424	0.209611	0	0	8.00322	16.8089	OGT
Regulation of Insulin Secretion Involved in Cellular Response to Glucose Stimulus (GO:0061178)	1/28	0.122424	0.209611	0	0	8.00322	16.8089	NR1D1
Negative Regulation of Protein Polymerization (GO:0032272)	1/28	0.122424	0.209611	0	0	8.00322	16.8089	TMSB4X
Negative Regulation of Protein Transport (GO:0051224)	1/28	0.122424	0.209611	0	0	8.00322	16.8089	RHBDF1
Carbohydrate Biosynthetic Process (GO:0016051)	1/28	0.122424	0.209611	0	0	8.00322	16.8089	DDX18
Regulation of Striated Muscle Contraction (GO:0006942)	1/28	0.122424	0.209611	0	0	8.00322	16.8089	SMAD7
Regulation of Toll-Like Receptor 4 Signaling Pathway (GO:0034143)	1/28	0.122424	0.209611	0	0	8.00322	16.8089	NR1D1
Cellular Response to Hexose Stimulus (GO:0071331)	1/28	0.122424	0.209611	0	0	8.00322	16.8089	OGT
Positive Regulation of ATP Metabolic Process (GO:1903580)	1/28	0.122424	0.209611	0	0	8.00322	16.8089	TMSB4X
Ventricular Septum Morphogenesis (GO:0060412)	1/28	0.122424	0.209611	0	0	8.00322	16.8089	SMAD7
Glycosaminoglycan Metabolic Process (GO:0030203)	1/28	0.122424	0.209611	0	0	8.00322	16.8089	DDX18
Positive Regulation of Signal Transduction by P53 Class Mediator (GO:1901798)	1/28	0.122424	0.209611	0	0	8.00322	16.8089	DDX5
Inner Ear Morphogenesis (GO:0042472)	1/28	0.122424	0.209611	0	0	8.00322	16.8089	FGFR2
Primary Neural Tube Formation (GO:0014020)	1/28	0.122424	0.209611	0	0	8.00322	16.8089	MTHFD1L
Membrane Fusion (GO:0061025)	1/28	0.122424	0.209611	0	0	8.00322	16.8089	DPP4
Chromatin Remodeling (GO:0006338)	3/262	0.122959	0.210181	0	0	2.5287	5.29992	PER1;CHD4;TOP1
Organelle Fusion (GO:0048284)	1/29	0.12651	0.214142	0	0	7.717	15.9544	MCL1
Regulation of Supramolecular Fiber Organization (GO:1902903)	1/29	0.12651	0.214142	0	0	7.717	15.9544	AEBP1
Regulation of Vascular Endothelial Growth Factor Production (GO:0010574)	1/29	0.12651	0.214142	0	0	7.717	15.9544	SULF1
Tube Closure (GO:0060606)	1/29	0.12651	0.214142	0	0	7.717	15.9544	MTHFD1L
Vascular Endothelial Growth Factor Receptor Signaling Pathway (GO:0048010)	1/29	0.12651	0.214142	0	0	7.717	15.9544	SULF1
Regulation of Androgen Receptor Signaling Pathway (GO:0060765)	1/29	0.12651	0.214142	0	0	7.717	15.9544	DDX5
Negative Regulation of Cytokine Production Involved in Inflammatory Response (GO:1900016)	1/30	0.130578	0.217491	0	0	7.45052	15.1677	PDCD4
GPI Anchored Protein Biosynthesis (GO:0180046)	1/30	0.130578	0.217491	0	0	7.45052	15.1677	DPM1
Regulation of Keratinocyte Differentiation (GO:0045616)	1/30	0.130578	0.217491	0	0	7.45052	15.1677	ROCK1
Regulation of Mitochondrion Organization (GO:0010821)	1/30	0.130578	0.217491	0	0	7.45052	15.1677	GOLPH3
Neural Tube Closure (GO:0001843)	1/30	0.130578	0.217491	0	0	7.45052	15.1677	MTHFD1L
Peptide Hormone Processing (GO:0016486)	1/30	0.130578	0.217491	0	0	7.45052	15.1677	DPP4
Positive Regulation of Cation Channel Activity (GO:2001259)	1/30	0.130578	0.217491	0	0	7.45052	15.1677	TMSB4X
Heterotypic Cell-Cell Adhesion (GO:0034113)	1/30	0.130578	0.217491	0	0	7.45052	15.1677	ITGA5
Lamellipodium Organization (GO:0097581)	1/30	0.130578	0.217491	0	0	7.45052	15.1677	GOLPH3
Prostaglandin Metabolic Process (GO:0006693)	1/30	0.130578	0.217491	0	0	7.45052	15.1677	PTGIS
Regulation of Dendritic Spine Morphogenesis (GO:0061001)	1/31	0.134627	0.221051	0	0	7.20181	14.4414	PTPRD
Negative Regulation of Intracellular Steroid Hormone Receptor Signaling Pathway (GO:0033144)	1/31	0.134627	0.221051	0	0	7.20181	14.4414	PER1
Golgi to Plasma Membrane Protein Transport (GO:0043001)	1/31	0.134627	0.221051	0	0	7.20181	14.4414	GOLPH3
Artery Morphogenesis (GO:0048844)	1/31	0.134627	0.221051	0	0	7.20181	14.4414	SMAD7
Positive Regulation of D-glucose Transmembrane Transport (GO:0010828)	1/31	0.134627	0.221051	0	0	7.20181	14.4414	NR4A3
Vacuolar Acidification (GO:0007035)	1/31	0.134627	0.221051	0	0	7.20181	14.4414	ATP6V0B
Intracellular pH Reduction (GO:0051452)	1/31	0.134627	0.221051	0	0	7.20181	14.4414	ATP6V0B
Leukocyte Cell-Cell Adhesion (GO:0007159)	1/31	0.134627	0.221051	0	0	7.20181	14.4414	ROCK1
Morphogenesis of an Epithelium (GO:0002009)	1/31	0.134627	0.221051	0	0	7.20181	14.4414	FGFR2
Regulation of Cytoskeleton Organization (GO:0051493)	2/139	0.13668	0.224069	0	0	3.17157	6.31179	ROCK1;RHOA
Cellular Component Assembly (GO:0022607)	3/277	0.138611	0.224134	0	0	2.38844	4.71976	PTPRD;DDX18;RHOA
Negative Regulation of Proteasomal Ubiquitin-Dependent Protein Catabolic Process (GO:0032435)	1/32	0.138657	0.224134	0	0	6.96914	13.7693	OGT
Apoptotic Mitochondrial Changes (GO:0008637)	1/32	0.138657	0.224134	0	0	6.96914	13.7693	MCL1
Respiratory System Development (GO:0060541)	1/32	0.138657	0.224134	0	0	6.96914	13.7693	FGFR2
Chondrocyte Differentiation (GO:0002062)	1/32	0.138657	0.224134	0	0	6.96914	13.7693	SULF1
Endodermal Cell Differentiation (GO:0035987)	1/32	0.138657	0.224134	0	0	6.96914	13.7693	ITGA5
Protein Localization to Golgi Apparatus (GO:0034067)	1/32	0.138657	0.224134	0	0	6.96914	13.7693	GOLPH3
miRNA Processing (GO:0035196)	1/32	0.138657	0.224134	0	0	6.96914	13.7693	DDX5
Regulation of Cell Migration Involved in Sprouting Angiogenesis (GO:0090049)	1/32	0.138657	0.224134	0	0	6.96914	13.7693	RHOA
Cortical Cytoskeleton Organization (GO:0030865)	1/33	0.142669	0.228842	0	0	6.75102	13.1458	ROCK1
Embryonic Skeletal System Morphogenesis (GO:0048704)	1/33	0.142669	0.228842	0	0	6.75102	13.1458	FGFR2
Epithelial Tube Morphogenesis (GO:0060562)	1/33	0.142669	0.228842	0	0	6.75102	13.1458	TBX20
Regulation of Amyloid-Beta Formation (GO:1902003)	1/33	0.142669	0.228842	0	0	6.75102	13.1458	ROCK1
Regulation of Cell Adhesion Mediated by Integrin (GO:0033628)	1/33	0.142669	0.228842	0	0	6.75102	13.1458	DPP4
Synapse Organization (GO:0050808)	2/144	0.144626	0.231624	0	0	3.05912	5.91514	PTPRD;SYN3
Regulation of Gluconeogenesis (GO:0006111)	1/34	0.146662	0.232382	0	0	6.54611	12.5661	OGT
Response to Exogenous dsRNA (GO:0043330)	1/34	0.146662	0.232382	0	0	6.54611	12.5661	COLEC12
Sarcomere Organization (GO:0045214)	1/34	0.146662	0.232382	0	0	6.54611	12.5661	CSRP2
Lung Development (GO:0030324)	1/34	0.146662	0.232382	0	0	6.54611	12.5661	FGFR2
Regulation of DNA Damage Response, Signal Transduction by P53 Class Mediator (GO:0043516)	1/34	0.146662	0.232382	0	0	6.54611	12.5661	DDX5
Regulation of Cardiac Muscle Contraction (GO:0055117)	1/34	0.146662	0.232382	0	0	6.54611	12.5661	SMAD7
Negative Regulation of Blood Vessel Endothelial Cell Migration (GO:0043537)	1/34	0.146662	0.232382	0	0	6.54611	12.5661	RHOA
Adherens Junction Organization (GO:0034332)	1/35	0.150637	0.235455	0	0	6.35326	12.026	SMAD7
Regulation of p38MAPK Cascade (GO:1900744)	1/35	0.150637	0.235455	0	0	6.35326	12.026	PER1
Regulation of Vasculature Development (GO:1901342)	1/35	0.150637	0.235455	0	0	6.35326	12.026	KRIT1
Response to Transforming Growth Factor Beta (GO:0071559)	1/35	0.150637	0.235455	0	0	6.35326	12.026	ROCK1
Skeletal Muscle Organ Development (GO:0060538)	1/35	0.150637	0.235455	0	0	6.35326	12.026	MYL6
Positive Regulation of Macromolecule Metabolic Process (GO:0010604)	1/35	0.150637	0.235455	0	0	6.35326	12.026	ANXA2
Positive Regulation of Substrate Adhesion-Dependent Cell Spreading (GO:1900026)	1/35	0.150637	0.235455	0	0	6.35326	12.026	ILK
Positive Regulation of Synapse Assembly (GO:0051965)	1/35	0.150637	0.235455	0	0	6.35326	12.026	PTPRD
Intracellular Receptor Signaling Pathway (GO:0030522)	1/35	0.150637	0.235455	0	0	6.35326	12.026	NR1D1
Regulation of Cold-Induced Thermogenesis (GO:0120161)	2/148	0.151051	0.235748	0	0	2.97471	5.62261	NR1D1;OGT
Regulation of Gene Expression (GO:0010468)	8/1127	0.153281	0.238417	0	0	1.58023	2.9637	PER1;SON;ROCK1;HNRNPDL;AHNAK2;BHLHE40;CHD4;AEBP1
RNA Processing (GO:0006396)	3/291	0.153799	0.238417	0	0	2.27072	4.25103	FBL;SON;HNRNPDL
Negative Regulation of Epithelial to Mesenchymal Transition (GO:0010719)	1/36	0.154593	0.238417	0	0	6.17143	11.5218	SMAD7
Negative Regulation of Smooth Muscle Cell Proliferation (GO:0048662)	1/36	0.154593	0.238417	0	0	6.17143	11.5218	PDCD4
Carboxylic Acid Metabolic Process (GO:0019752)	1/36	0.154593	0.238417	0	0	6.17143	11.5218	PTGIS
Positive Regulation of Epithelial Cell Migration (GO:0010634)	1/36	0.154593	0.238417	0	0	6.17143	11.5218	CAPN7
Establishment or Maintenance of Epithelial Cell Apical/Basal Polarity (GO:0045197)	1/36	0.154593	0.238417	0	0	6.17143	11.5218	RHOA
Negative Regulation of Cell Cycle G1/S Phase Transition (GO:1902807)	1/36	0.154593	0.238417	0	0	6.17143	11.5218	TMSB4X
Protein Localization to Organelle (GO:0033365)	2/151	0.155907	0.240088	0	0	2.91437	5.41635	DNAJA1;LMNA
Protein Metabolic Process (GO:0019538)	5/614	0.157689	0.240921	0	0	1.80046	3.32567	DPP4;CAPN7;PLOD2;MAN2B1;RPL10A
Negative Regulation of Endothelial Cell Migration (GO:0010596)	1/37	0.158531	0.240921	0	0	5.9997	11.0503	KRIT1
Regulation of mRNA Processing (GO:0050684)	1/37	0.158531	0.240921	0	0	5.9997	11.0503	SON
Regulation of Receptor Internalization (GO:0002090)	1/37	0.158531	0.240921	0	0	5.9997	11.0503	ANXA2
Cellular Response to Glucose Stimulus (GO:0071333)	1/37	0.158531	0.240921	0	0	5.9997	11.0503	OGT
Regulatory ncRNA-mediated Gene Silencing (GO:0031047)	1/37	0.158531	0.240921	0	0	5.9997	11.0503	COLEC12
Intrinsic Apoptotic Signaling Pathway by P53 Class Mediator (GO:0072332)	1/37	0.158531	0.240921	0	0	5.9997	11.0503	DDX5
Protein N-linked Glycosylation via Asparagine (GO:0018279)	1/37	0.158531	0.240921	0	0	5.9997	11.0503	DPM1
Regulation of Cellular Component Biogenesis (GO:0044087)	1/37	0.158531	0.240921	0	0	5.9997	11.0503	ROCK1
Regulation of Microtubule Cytoskeleton Organization (GO:0070507)	1/38	0.162451	0.244029	0	0	5.83725	10.6085	ROCK1
Neuron Projection Extension (GO:1990138)	1/38	0.162451	0.244029	0	0	5.83725	10.6085	TSC22D4
Nuclear Transport (GO:0051169)	1/38	0.162451	0.244029	0	0	5.83725	10.6085	AHCTF1
Regulation of Sprouting Angiogenesis (GO:1903670)	1/38	0.162451	0.244029	0	0	5.83725	10.6085	ITGA5
Striated Muscle Tissue Development (GO:0014706)	1/38	0.162451	0.244029	0	0	5.83725	10.6085	MYL6
Ventricular Septum Development (GO:0003281)	1/38	0.162451	0.244029	0	0	5.83725	10.6085	SMAD7
Glutathione Metabolic Process (GO:0006749)	1/38	0.162451	0.244029	0	0	5.83725	10.6085	GSTT2
Heart Looping (GO:0001947)	1/38	0.162451	0.244029	0	0	5.83725	10.6085	TBX20
DNA Metabolic Process (GO:0006259)	3/302	0.166088	0.2481	0	0	2.18595	3.92431	REV1;TOP1;PTMS
Semaphorin-Plexin Signaling Pathway (GO:0071526)	1/39	0.166353	0.2481	0	0	5.68335	10.1939	RHOA
Positive Regulation of Lymphocyte Differentiation (GO:0045621)	1/39	0.166353	0.2481	0	0	5.68335	10.1939	AXL
Positive Regulation of Neuron Apoptotic Process (GO:0043525)	1/39	0.166353	0.2481	0	0	5.68335	10.1939	MCL1
Negative Regulation of Cell-Substrate Adhesion (GO:0010812)	1/39	0.166353	0.2481	0	0	5.68335	10.1939	RHOA
Epithelium Development (GO:0060429)	2/159	0.168999	0.249602	0	0	2.76475	4.91535	KRIT1;FGFR2
Regulation of Cytokine-Mediated Signaling Pathway (GO:0001959)	1/40	0.170237	0.249602	0	0	5.53735	9.80421	AXL
Negative Regulation of Protein Secretion (GO:0050709)	1/40	0.170237	0.249602	0	0	5.53735	9.80421	RHBDF1
Negative Regulation of Proteolysis (GO:0045861)	1/40	0.170237	0.249602	0	0	5.53735	9.80421	ROCK1
Cellular Response to Amino Acid Stimulus (GO:0071230)	1/40	0.170237	0.249602	0	0	5.53735	9.80421	MAT2A
Constitutive Heterochromatin Formation (GO:0140719)	1/40	0.170237	0.249602	0	0	5.53735	9.80421	MPHOSPH8
Positive Regulation of Cytokinesis (GO:0032467)	1/40	0.170237	0.249602	0	0	5.53735	9.80421	RHOA
Embryonic Skeletal System Development (GO:0048706)	1/40	0.170237	0.249602	0	0	5.53735	9.80421	SULF1
Energy Derivation by Oxidation of Organic Compounds (GO:0015980)	1/40	0.170237	0.249602	0	0	5.53735	9.80421	NR4A3
Establishment of Protein Localization to Extracellular Region (GO:0035592)	1/40	0.170237	0.249602	0	0	5.53735	9.80421	GOLPH3
Positive Regulation of Stem Cell Population Maintenance (GO:1902459)	1/40	0.170237	0.249602	0	0	5.53735	9.80421	OGT
Positive Regulation of Viral Process (GO:0048524)	1/40	0.170237	0.249602	0	0	5.53735	9.80421	AXL
Skeletal System Development (GO:0001501)	2/160	0.170649	0.249853	0	0	2.74711	4.85731	SULF1;FGFR2
Negative Regulation of Kinase Activity (GO:0033673)	1/41	0.174104	0.252778	0	0	5.39864	9.43739	YWHAG
Negative Regulation of Secretion by Cell (GO:1903531)	1/41	0.174104	0.252778	0	0	5.39864	9.43739	RHBDF1
Regulation of Neurotransmitter Secretion (GO:0046928)	1/41	0.174104	0.252778	0	0	5.39864	9.43739	MYOF
Odontogenesis (GO:0042476)	1/41	0.174104	0.252778	0	0	5.39864	9.43739	FGFR2
Connective Tissue Development (GO:0061448)	1/41	0.174104	0.252778	0	0	5.39864	9.43739	SULF1
Establishment of Protein Localization to Plasma Membrane (GO:0061951)	1/41	0.174104	0.252778	0	0	5.39864	9.43739	GOLPH3
Regulation of Glycolytic Process (GO:0006110)	1/42	0.177952	0.254461	0	0	5.2667	9.0916	OGT
Blood Vessel Diameter Maintenance (GO:0097746)	1/42	0.177952	0.254461	0	0	5.2667	9.0916	ROCK1
Skeletal Muscle Tissue Development (GO:0007519)	1/42	0.177952	0.254461	0	0	5.2667	9.0916	MYL6
Determination of Heart Left/Right Asymmetry (GO:0061371)	1/42	0.177952	0.254461	0	0	5.2667	9.0916	TBX20
Digestive Tract Development (GO:0048565)	1/42	0.177952	0.254461	0	0	5.2667	9.0916	FGFR2
Embryonic Heart Tube Morphogenesis (GO:0003143)	1/42	0.177952	0.254461	0	0	5.2667	9.0916	TBX20
Positive Regulation of Neuron Differentiation (GO:0045666)	1/42	0.177952	0.254461	0	0	5.2667	9.0916	RHOA
Lipid Catabolic Process (GO:0016042)	1/42	0.177952	0.254461	0	0	5.2667	9.0916	PLA1A
Protein Destabilization (GO:0031648)	1/42	0.177952	0.254461	0	0	5.2667	9.0916	NR1D1
Lysosome Localization (GO:0032418)	1/42	0.177952	0.254461	0	0	5.2667	9.0916	NR4A3
Regulation of Chromosome Organization (GO:0033044)	1/42	0.177952	0.254461	0	0	5.2667	9.0916	LMNA
Regulation of Epithelial Cell Migration (GO:0010632)	1/43	0.181782	0.257114	0	0	5.14105	8.7652	CAPN7
Negative Regulation of Ubiquitin-Dependent Protein Catabolic Process (GO:2000059)	1/43	0.181782	0.257114	0	0	5.14105	8.7652	OGT
Non-Canonical Wnt Signaling Pathway (GO:0035567)	1/43	0.181782	0.257114	0	0	5.14105	8.7652	RHOA
Cellular Response to Glucose Starvation (GO:0042149)	1/43	0.181782	0.257114	0	0	5.14105	8.7652	YWHAG
Skeletal System Morphogenesis (GO:0048705)	1/43	0.181782	0.257114	0	0	5.14105	8.7652	FGFR2
Positive Regulation of Receptor-Mediated Endocytosis (GO:0048260)	1/43	0.181782	0.257114	0	0	5.14105	8.7652	ANXA2
Positive Regulation of Stress Fiber Assembly (GO:0051496)	1/43	0.181782	0.257114	0	0	5.14105	8.7652	RHOA
mRNA Transcription (GO:0009299)	1/43	0.181782	0.257114	0	0	5.14105	8.7652	DDX5
Regulation of Microtubule-Based Process (GO:0032886)	1/44	0.185595	0.261114	0	0	5.02123	8.45669	ROCK1
Response to Unfolded Protein (GO:0006986)	1/44	0.185595	0.261114	0	0	5.02123	8.45669	DNAJA1
Substantia Nigra Development (GO:0021762)	1/44	0.185595	0.261114	0	0	5.02123	8.45669	RHOA
Cellular Response to Nitrogen Compound (GO:1901699)	2/169	0.185614	0.261114	0	0	2.59788	4.37506	GOLPH3;MAT2A
Positive Regulation of Cell Population Proliferation (GO:0008284)	4/484	0.188463	0.263577	0	0	1.81901	3.03566	DPP4;NR4A3;TBX20;FGFR2
Regulation of Nervous System Development (GO:0051960)	1/45	0.189391	0.263577	0	0	4.90687	8.16475	BHLHE40
Regulation of Nitric Oxide Biosynthetic Process (GO:0045428)	1/45	0.189391	0.263577	0	0	4.90687	8.16475	PTGIS
Cellular Response to Ketone (GO:1901655)	1/45	0.189391	0.263577	0	0	4.90687	8.16475	GOLPH3
Positive Regulation of Cell-Matrix Adhesion (GO:0001954)	1/45	0.189391	0.263577	0	0	4.90687	8.16475	ROCK1
Synaptic Vesicle Cycle (GO:0099504)	1/45	0.189391	0.263577	0	0	4.90687	8.16475	SYN3
Negative Regulation of BMP Signaling Pathway (GO:0030514)	1/45	0.189391	0.263577	0	0	4.90687	8.16475	SMAD7
Negative Regulation of Biosynthetic Process (GO:0009890)	1/45	0.189391	0.263577	0	0	4.90687	8.16475	PTGIS
Chromatin Organization (GO:0006325)	3/323	0.190309	0.264502	0	0	2.04031	3.38509	PER1;CHD4;TOP1
Membrane Organization (GO:0061024)	2/173	0.192326	0.26599	0	0	2.5366	4.18174	DPP4;LMNA
Negative Regulation of Proteasomal Protein Catabolic Process (GO:1901799)	1/46	0.193169	0.26599	0	0	4.79758	7.88815	OGT
Peptidyl-Tyrosine Modification (GO:0018212)	1/46	0.193169	0.26599	0	0	4.79758	7.88815	FGFR2
Regulation of Transport (GO:0051049)	1/46	0.193169	0.26599	0	0	4.79758	7.88815	DNAJA1
Positive Regulation of Chemotaxis (GO:0050921)	1/46	0.193169	0.26599	0	0	4.79758	7.88815	TMSB4X
Mononuclear Cell Differentiation (GO:1903131)	1/46	0.193169	0.26599	0	0	4.79758	7.88815	AXL
Regulation of Cell-Substrate Adhesion (GO:0010810)	1/46	0.193169	0.26599	0	0	4.79758	7.88815	RHOA
Negative Regulation of Cold-Induced Thermogenesis (GO:0120163)	1/47	0.196929	0.26868	0	0	4.69305	7.6258	NR1D1
Positive Regulation of T Cell Mediated Immunity (GO:0002711)	1/47	0.196929	0.26868	0	0	4.69305	7.6258	YWHAG
Retrograde Vesicle-Mediated Transport, Golgi to Endoplasmic Reticulum (GO:0006890)	1/47	0.196929	0.26868	0	0	4.69305	7.6258	GOLPH3
Positive Regulation of Cytokine-Mediated Signaling Pathway (GO:0001961)	1/47	0.196929	0.26868	0	0	4.69305	7.6258	AXL
Stem Cell Differentiation (GO:0048863)	1/47	0.196929	0.26868	0	0	4.69305	7.6258	FGFR2
Positive Regulation of mRNA Catabolic Process (GO:0061014)	1/47	0.196929	0.26868	0	0	4.69305	7.6258	ROCK1
Mitotic Spindle Assembly (GO:0090307)	1/47	0.196929	0.26868	0	0	4.69305	7.6258	RHOA
Regulation of Exocytosis (GO:0017157)	1/48	0.200672	0.272359	0	0	4.59297	7.37669	ANXA2
Nuclear Receptor-Mediated Steroid Hormone Signaling Pathway (GO:0030518)	1/48	0.200672	0.272359	0	0	4.59297	7.37669	DDX5
Cellular Response to Chemokine (GO:1990869)	1/48	0.200672	0.272359	0	0	4.59297	7.37669	RHOA
Mitophagy (GO:0000423)	1/48	0.200672	0.272359	0	0	4.59297	7.37669	OGT
Regulation of Insulin Receptor Signaling Pathway (GO:0046626)	1/49	0.204398	0.274199	0	0	4.49706	7.13992	OGT
RNA 3'-End Processing (GO:0031123)	1/49	0.204398	0.274199	0	0	4.49706	7.13992	COLEC12
Actin Polymerization or Depolymerization (GO:0008154)	1/49	0.204398	0.274199	0	0	4.49706	7.13992	CFL2
Regulation of Stem Cell Differentiation (GO:2000736)	1/49	0.204398	0.274199	0	0	4.49706	7.13992	CHD4
Cellular Component Disassembly (GO:0022411)	1/49	0.204398	0.274199	0	0	4.49706	7.13992	SMAD7
Positive Regulation of Smooth Muscle Cell Proliferation (GO:0048661)	1/49	0.204398	0.274199	0	0	4.49706	7.13992	NR4A3
Positive Regulation of Transport (GO:0051050)	1/49	0.204398	0.274199	0	0	4.49706	7.13992	ANXA2
mRNA Catabolic Process (GO:0006402)	1/49	0.204398	0.274199	0	0	4.49706	7.13992	DDX5
Negative Regulation of TORC1 Signaling (GO:1904262)	1/49	0.204398	0.274199	0	0	4.49706	7.13992	YWHAG
Neuron Differentiation (GO:0030182)	2/181	0.205843	0.275782	0	0	2.42225	3.82871	PTPRD;ID3
RNA Methylation (GO:0001510)	1/50	0.208106	0.276678	0	0	4.40506	6.91464	FBL
Negative Regulation of Protein Binding (GO:0032091)	1/50	0.208106	0.276678	0	0	4.40506	6.91464	ROCK1
Nucleocytoplasmic Transport (GO:0006913)	1/50	0.208106	0.276678	0	0	4.40506	6.91464	AHCTF1
Positive Regulation of Blood Vessel Endothelial Cell Migration (GO:0043536)	1/50	0.208106	0.276678	0	0	4.40506	6.91464	TMSB4X
tRNA Processing (GO:0008033)	1/50	0.208106	0.276678	0	0	4.40506	6.91464	COLEC12
Positive Regulation of Lymphocyte Activation (GO:0051251)	1/50	0.208106	0.276678	0	0	4.40506	6.91464	YWHAG
Regulation of Epidermal Growth Factor Receptor Signaling Pathway (GO:0042058)	1/51	0.211798	0.278386	0	0	4.31674	6.70011	RHBDF1
Regulation of Lipid Metabolic Process (GO:0019216)	1/51	0.211798	0.278386	0	0	4.31674	6.70011	NR1D1
Blood Vessel Morphogenesis (GO:0048514)	1/51	0.211798	0.278386	0	0	4.31674	6.70011	SMAD7
Cardiac Muscle Tissue Development (GO:0048738)	1/51	0.211798	0.278386	0	0	4.31674	6.70011	TBX20
Response to Glucose (GO:0009749)	1/51	0.211798	0.278386	0	0	4.31674	6.70011	OGT
Positive Regulation of Actin Filament Bundle Assembly (GO:0032233)	1/51	0.211798	0.278386	0	0	4.31674	6.70011	RHOA
Positive Regulation of Nervous System Development (GO:0051962)	1/51	0.211798	0.278386	0	0	4.31674	6.70011	PTPRD
Proton Transmembrane Transport (GO:1902600)	1/51	0.211798	0.278386	0	0	4.31674	6.70011	ATP6V0B
Myofibril Assembly (GO:0030239)	1/51	0.211798	0.278386	0	0	4.31674	6.70011	CSRP2
Regulation of Substrate Adhesion-Dependent Cell Spreading (GO:1900024)	1/52	0.215472	0.281086	0	0	4.23188	6.49561	ILK
Regulation of Telomere Maintenance (GO:0032204)	1/52	0.215472	0.281086	0	0	4.23188	6.49561	LMNA
Signal Transduction by P53 Class Mediator (GO:0072331)	1/52	0.215472	0.281086	0	0	4.23188	6.49561	DDX5
Endosome Organization (GO:0007032)	1/52	0.215472	0.281086	0	0	4.23188	6.49561	ATP6V0B
Positive Regulation of Proteolysis (GO:0045862)	1/52	0.215472	0.281086	0	0	4.23188	6.49561	OGT
Intrinsic Apoptotic Signaling Pathway in Response to DNA Damage (GO:0008630)	1/52	0.215472	0.281086	0	0	4.23188	6.49561	MCL1
Negative Regulation of Immune System Process (GO:0002683)	1/53	0.21913	0.284432	0	0	4.15029	6.30052	NR1D1
Regulation of Proteolysis (GO:0030162)	1/53	0.21913	0.284432	0	0	4.15029	6.30052	OGT
Regulation of Smoothened Signaling Pathway (GO:0008589)	1/53	0.21913	0.284432	0	0	4.15029	6.30052	FGFR2
Cytoplasmic Microtubule Organization (GO:0031122)	1/53	0.21913	0.284432	0	0	4.15029	6.30052	RHOA
Apical Junction Assembly (GO:0043297)	1/54	0.222771	0.287863	0	0	4.07178	6.11423	RHOA
Regulation of Smooth Muscle Cell Proliferation (GO:0048660)	1/54	0.222771	0.287863	0	0	4.07178	6.11423	NR4A3
mRNA Destabilization (GO:0061157)	1/54	0.222771	0.287863	0	0	4.07178	6.11423	ROCK1
Negative Regulation of Cytokine Production (GO:0001818)	2/191	0.22288	0.287863	0	0	2.29292	3.44196	AXL;PDCD4
Generation of Neurons (GO:0048699)	2/192	0.22459	0.289713	0	0	2.28074	3.40624	PTPRD;ID3
Golgi to Plasma Membrane Transport (GO:0006893)	1/55	0.226395	0.290242	0	0	3.99618	5.93622	GOLPH3
Regulation of Metabolic Process (GO:0019222)	1/55	0.226395	0.290242	0	0	3.99618	5.93622	MFAP4
Nucleus Organization (GO:0006997)	1/55	0.226395	0.290242	0	0	3.99618	5.93622	LMNA
Glycolipid Biosynthetic Process (GO:0009247)	1/55	0.226395	0.290242	0	0	3.99618	5.93622	DPM1
Icosanoid Metabolic Process (GO:0006690)	1/55	0.226395	0.290242	0	0	3.99618	5.93622	PTGIS
Regulation of Proteasomal Protein Catabolic Process (GO:0061136)	1/56	0.230002	0.293421	0	0	3.92332	5.76598	RHBDF1
Regulation of Stem Cell Population Maintenance (GO:2000036)	1/56	0.230002	0.293421	0	0	3.92332	5.76598	OGT
Cellular Response to Alcohol (GO:0097306)	1/56	0.230002	0.293421	0	0	3.92332	5.76598	GOLPH3
Sulfur Compound Biosynthetic Process (GO:0044272)	1/56	0.230002	0.293421	0	0	3.92332	5.76598	MAT2A
Cartilage Development (GO:0051216)	1/57	0.233592	0.297273	0	0	3.85307	5.60304	SULF1
Regulation of Blood Vessel Endothelial Cell Migration (GO:0043535)	1/57	0.233592	0.297273	0	0	3.85307	5.60304	TMSB4X
Peptidyl-Tyrosine Phosphorylation (GO:0018108)	1/58	0.237166	0.301086	0	0	3.78528	5.44699	FGFR2
Muscle Organ Development (GO:0007517)	1/58	0.237166	0.301086	0	0	3.78528	5.44699	LMNA
Negative Regulation of Gene Expression (GO:0010629)	3/364	0.239865	0.30375	0	0	1.8048	2.57668	ROCK1;CHD4;MPHOSPH8
Negative Regulation of Protein-Containing Complex Assembly (GO:0031333)	1/59	0.240724	0.30375	0	0	3.71983	5.29743	OGT
Renal System Development (GO:0072001)	1/59	0.240724	0.30375	0	0	3.71983	5.29743	SULF1
Response to Light Stimulus (GO:0009416)	1/59	0.240724	0.30375	0	0	3.71983	5.29743	REV1
Microtubule Cytoskeleton Organization Involved in Mitosis (GO:1902850)	1/59	0.240724	0.30375	0	0	3.71983	5.29743	ILK
Negative Regulation of Intrinsic Apoptotic Signaling Pathway (GO:2001243)	1/60	0.244265	0.305992	0	0	3.6566	5.15398	DNAJA1
Negative Regulation of Protein Kinase Activity (GO:0006469)	1/60	0.244265	0.305992	0	0	3.6566	5.15398	YWHAG
Positive Regulation of Cell Cycle (GO:0045787)	1/60	0.244265	0.305992	0	0	3.6566	5.15398	FGFR2
Post-Transcriptional Regulation of Gene Expression (GO:0010608)	1/60	0.244265	0.305992	0	0	3.6566	5.15398	PER1
Protein Secretion (GO:0009306)	1/60	0.244265	0.305992	0	0	3.6566	5.15398	GOLPH3
Regulation of SMAD Protein Signal Transduction (GO:0060390)	1/60	0.244265	0.305992	0	0	3.6566	5.15398	SMAD7
Positive Regulation of Canonical NF-kappaB Signal Transduction (GO:0043123)	2/204	0.245186	0.306777	0	0	2.14395	3.01383	ILK;RHOA
Autophagy of Mitochondrion (GO:0000422)	1/61	0.24779	0.309663	0	0	3.59547	5.01631	OGT
Protein Phosphorylation (GO:0006468)	3/373	0.251043	0.313352	0	0	1.76009	2.43268	ROCK1;TOP1;FGFR2
Negative Regulation of Metabolic Process (GO:0009892)	1/63	0.25479	0.31689	0	0	3.47914	4.75707	NR1D1
RNA Metabolic Process (GO:0016070)	1/63	0.25479	0.31689	0	0	3.47914	4.75707	ATXN2L
Canonical Wnt Signaling Pathway (GO:0060070)	1/63	0.25479	0.31689	0	0	3.47914	4.75707	SMAD7
Regulation of Synapse Assembly (GO:0051963)	1/64	0.258267	0.319704	0	0	3.42374	4.63493	PTPRD
Epigenetic Regulation of Gene Expression (GO:0040029)	1/64	0.258267	0.319704	0	0	3.42374	4.63493	MPHOSPH8
Protein N-linked Glycosylation (GO:0006487)	1/64	0.258267	0.319704	0	0	3.42374	4.63493	DPM1
Positive Regulation of RNA Biosynthetic Process (GO:1902680)	4/555	0.258281	0.319704	0	0	1.57883	2.13727	ILK;CHD4;NR1D1;OGT
Protein Stabilization (GO:0050821)	2/212	0.258963	0.320167	0	0	2.06143	2.78514	PER3;SMAD7
Regulation of Endocytosis (GO:0030100)	1/65	0.261727	0.321294	0	0	3.37007	4.51743	ROCK1
Anterior/Posterior Pattern Specification (GO:0009952)	1/65	0.261727	0.321294	0	0	3.37007	4.51743	BHLHE40
Fat Cell Differentiation (GO:0045444)	1/65	0.261727	0.321294	0	0	3.37007	4.51743	NR4A3
Glycerophospholipid Metabolic Process (GO:0006650)	1/65	0.261727	0.321294	0	0	3.37007	4.51743	PLA1A
Negative Regulation of NF-kappaB Transcription Factor Activity (GO:0032088)	1/65	0.261727	0.321294	0	0	3.37007	4.51743	PTGIS
Negative Regulation of Autophagy (GO:0010507)	1/65	0.261727	0.321294	0	0	3.37007	4.51743	MCL1
Regulation of miRNA Transcription (GO:1902893)	1/66	0.265171	0.323614	0	0	3.31806	4.40433	DDX5
Regulation of Neurogenesis (GO:0050767)	1/66	0.265171	0.323614	0	0	3.31806	4.40433	BHLHE40
Cell-Cell Junction Organization (GO:0045216)	1/66	0.265171	0.323614	0	0	3.31806	4.40433	TLN1
Protein-Containing Complex Disassembly (GO:0032984)	1/66	0.265171	0.323614	0	0	3.31806	4.40433	SMAD7
Negative Regulation of Binding (GO:0051100)	1/66	0.265171	0.323614	0	0	3.31806	4.40433	ROCK1
Regulation of Canonical Wnt Signaling Pathway (GO:0060828)	2/216	0.265858	0.324073	0	0	2.02249	2.67938	ILK;FGFR2
Regulation of Protein Serine/Threonine Kinase Activity (GO:0071900)	1/67	0.268599	0.326268	0	0	3.26762	4.2954	RHOA
Negative Regulation of Cell Adhesion (GO:0007162)	1/67	0.268599	0.326268	0	0	3.26762	4.2954	RHOA
Regulation of Cellular Localization (GO:0060341)	1/67	0.268599	0.326268	0	0	3.26762	4.2954	YWHAG
Extrinsic Apoptotic Signaling Pathway (GO:0097191)	1/68	0.272012	0.32926	0	0	3.21869	4.19045	MCL1
Regulation of T Cell Activation (GO:0050863)	1/68	0.272012	0.32926	0	0	3.21869	4.19045	YWHAG
Regulation of Cell Communication (GO:0010646)	1/68	0.272012	0.32926	0	0	3.21869	4.19045	YWHAG
Negative Regulation of Cell Differentiation (GO:0045596)	2/220	0.272754	0.329776	0	0	1.98498	2.57885	PDCD4;SMAD7
Defense Response to Bacterium (GO:0042742)	2/221	0.274478	0.331475	0	0	1.97581	2.5545	COLEC12;SLC15A2
Regulation of Heart Contraction (GO:0008016)	1/70	0.278789	0.335902	0	0	3.12508	3.99166	SMAD7
Negative Regulation of TOR Signaling (GO:0032007)	1/70	0.278789	0.335902	0	0	3.12508	3.99166	YWHAG
Phagocytosis (GO:0006909)	1/71	0.282155	0.338781	0	0	3.08028	3.89748	AXL
Positive Regulation of Proteasomal Ubiquitin-Dependent Protein Catabolic Process (GO:0032436)	1/71	0.282155	0.338781	0	0	3.08028	3.89748	SMAD7
Regulation of Actin Filament Polymerization (GO:0030833)	1/71	0.282155	0.338781	0	0	3.08028	3.89748	TMSB4X
Negative Regulation of Extrinsic Apoptotic Signaling Pathway (GO:2001237)	1/72	0.285505	0.341621	0	0	3.03674	3.80655	MCL1
Kidney Development (GO:0001822)	1/72	0.285505	0.341621	0	0	3.03674	3.80655	SULF1
Regulation of G Protein-Coupled Receptor Signaling Pathway (GO:0008277)	1/72	0.285505	0.341621	0	0	3.03674	3.80655	ROCK1
Regulation of Cell Population Proliferation (GO:0042127)	5/769	0.287111	0.343149	0	0	1.42365	1.77656	DPP4;NR4A3;LMNA;RHOA;FGFR2
Positive Regulation of Cell-Substrate Adhesion (GO:0010811)	1/73	0.288839	0.343636	0	0	2.99441	3.71872	ILK
Spindle Assembly (GO:0051225)	1/73	0.288839	0.343636	0	0	2.99441	3.71872	RHOA
Embryonic Organ Development (GO:0048568)	1/73	0.288839	0.343636	0	0	2.99441	3.71872	FGFR2
Positive Regulation of Protein Transport (GO:0051222)	1/73	0.288839	0.343636	0	0	2.99441	3.71872	GOLPH3
Positive Regulation of Cytoskeleton Organization (GO:0051495)	1/74	0.292158	0.347188	0	0	2.95325	3.63385	CFL2
Regulation of Fat Cell Differentiation (GO:0045598)	1/75	0.295462	0.349518	0	0	2.91319	3.55181	NR1D1
Gland Development (GO:0048732)	1/75	0.295462	0.349518	0	0	2.91319	3.55181	FGFR2
Positive Regulation of Protein Serine/Threonine Kinase Activity (GO:0071902)	1/75	0.295462	0.349518	0	0	2.91319	3.55181	RHOA
Import Into Nucleus (GO:0051170)	1/75	0.295462	0.349518	0	0	2.91319	3.55181	KPNA4
Transforming Growth Factor Beta Receptor Signaling Pathway (GO:0007179)	1/76	0.29875	0.351809	0	0	2.8742	3.47246	SMAD7
Glycoprotein Biosynthetic Process (GO:0009101)	1/76	0.29875	0.351809	0	0	2.8742	3.47246	GOLPH3
Positive Regulation of Protein Secretion (GO:0050714)	1/76	0.29875	0.351809	0	0	2.8742	3.47246	GOLPH3
Lymphocyte Differentiation (GO:0030098)	1/76	0.29875	0.351809	0	0	2.8742	3.47246	AXL
Cellular Response to UV (GO:0034644)	1/77	0.302023	0.355261	0	0	2.83624	3.39569	MFAP4
Regulation of Protein Binding (GO:0043393)	1/78	0.305281	0.358284	0	0	2.79927	3.32139	ROCK1
Cell Chemotaxis (GO:0060326)	1/78	0.305281	0.358284	0	0	2.79927	3.32139	ACKR4
Regulation of Cell Cycle G1/S Phase Transition (GO:1902806)	1/79	0.308525	0.361682	0	0	2.76324	3.24944	TMSB4X
Regulation of mRNA Stability (GO:0043488)	1/80	0.311753	0.363014	0	0	2.72812	3.17975	ROCK1
Cholesterol Homeostasis (GO:0042632)	1/80	0.311753	0.363014	0	0	2.72812	3.17975	NR1D1
Response to Tumor Necrosis Factor (GO:0034612)	1/80	0.311753	0.363014	0	0	2.72812	3.17975	NR1D1
Protein Import Into Nucleus (GO:0006606)	1/80	0.311753	0.363014	0	0	2.72812	3.17975	KPNA4
Proteolysis Involved in Protein Catabolic Process (GO:0051603)	1/80	0.311753	0.363014	0	0	2.72812	3.17975	NR1D1
Regulation of TOR Signaling (GO:0032006)	1/80	0.311753	0.363014	0	0	2.72812	3.17975	GOLPH3
Regulation of Cytokinesis (GO:0032465)	1/81	0.314966	0.365122	0	0	2.69389	3.11222	RHOA
Sterol Homeostasis (GO:0055092)	1/81	0.314966	0.365122	0	0	2.69389	3.11222	NR1D1
Wound Healing (GO:0042060)	1/81	0.314966	0.365122	0	0	2.69389	3.11222	MYOF
Positive Regulation of Organelle Organization (GO:0010638)	1/81	0.314966	0.365122	0	0	2.69389	3.11222	ANXA2
Response to Insulin (GO:0032868)	1/82	0.318164	0.368419	0	0	2.66049	3.04677	OGT
Negative Regulation of Protein Phosphorylation (GO:0001933)	1/83	0.321348	0.37128	0	0	2.62792	2.98329	YWHAG
Regulation of Protein Kinase Activity (GO:0045859)	1/83	0.321348	0.37128	0	0	2.62792	2.98329	YWHAG
Vascular Transport (GO:0010232)	1/84	0.324517	0.374525	0	0	2.59612	2.92173	SLC15A2
Peptidyl-Lysine Modification (GO:0018205)	1/85	0.327671	0.375667	0	0	2.56509	2.86199	PLOD2
Cell Morphogenesis Involved in Neuron Differentiation (GO:0048667)	1/85	0.327671	0.375667	0	0	2.56509	2.86199	FGFR2
Cellular Respiration (GO:0045333)	1/85	0.327671	0.375667	0	0	2.56509	2.86199	NR4A3
Ribosomal Small Subunit Biogenesis (GO:0042274)	1/85	0.327671	0.375667	0	0	2.56509	2.86199	FBL
Positive Regulation of Endocytosis (GO:0045807)	1/85	0.327671	0.375667	0	0	2.56509	2.86199	AXL
Regulation of Cell Division (GO:0051302)	1/85	0.327671	0.375667	0	0	2.56509	2.86199	FGFR2
Epidermis Development (GO:0008544)	1/86	0.330811	0.378433	0	0	2.53478	2.804	FGFR2
Transport Across Blood-Brain Barrier (GO:0150104)	1/86	0.330811	0.378433	0	0	2.53478	2.804	SLC15A2
Cytokine-Mediated Signaling Pathway (GO:0019221)	2/255	0.332791	0.380281	0	0	1.70734	1.87848	TMSB4X;ILK
Synapse Assembly (GO:0007416)	1/87	0.333936	0.38117	0	0	2.50518	2.7477	PTPRD
Regulation of Endothelial Cell Migration (GO:0010594)	1/88	0.337046	0.382623	0	0	2.47626	2.69302	KRIT1
Regulation of Type II Interferon Production (GO:0032649)	1/88	0.337046	0.382623	0	0	2.47626	2.69302	AXL
Positive Regulation of Endothelial Cell Migration (GO:0010595)	1/88	0.337046	0.382623	0	0	2.47626	2.69302	TMSB4X
Positive Regulation of Protein Kinase Activity (GO:0045860)	1/88	0.337046	0.382623	0	0	2.47626	2.69302	RHOA
Positive Regulation of Ubiquitin-Dependent Protein Catabolic Process (GO:2000060)	1/88	0.337046	0.382623	0	0	2.47626	2.69302	SMAD7
Nuclear-Transcribed mRNA Catabolic Process (GO:0000956)	1/89	0.340143	0.385298	0	0	2.448	2.6399	DDX5
Cellular Response to Hormone Stimulus (GO:0032870)	1/89	0.340143	0.385298	0	0	2.448	2.6399	NR4A3
Regulation of Epithelial to Mesenchymal Transition (GO:0010717)	1/91	0.346293	0.390988	0	0	2.39336	2.53809	SMAD7
Calcium-Mediated Signaling (GO:0019722)	1/91	0.346293	0.390988	0	0	2.39336	2.53809	ACKR4
Phosphatidylinositol Biosynthetic Process (GO:0006661)	1/91	0.346293	0.390988	0	0	2.39336	2.53809	DPM1
Positive Regulation of Cell Adhesion (GO:0045785)	1/92	0.349346	0.393582	0	0	2.36694	2.48929	YWHAG
Positive Regulation of Response to Stimulus (GO:0048584)	1/92	0.349346	0.393582	0	0	2.36694	2.48929	ILK
Regulation of Insulin Secretion (GO:0050796)	1/93	0.352386	0.396577	0	0	2.34109	2.44183	NR1D1
Cellular Response to Peptide Hormone Stimulus (GO:0071375)	1/94	0.355411	0.39955	0	0	2.3158	2.39565	NR4A3
Regulation of Organelle Organization (GO:0033043)	1/97	0.364404	0.408776	0	0	2.24309	2.26438	GOLPH3
Regulation of Protein Localization (GO:0032880)	1/97	0.364404	0.408776	0	0	2.24309	2.26438	YWHAG
Cellular Response to Transforming Growth Factor Beta Stimulus (GO:0071560)	1/98	0.367374	0.410339	0	0	2.21986	2.22291	SMAD7
Positive Regulation of Proteasomal Protein Catabolic Process (GO:1901800)	1/98	0.367374	0.410339	0	0	2.21986	2.22291	SMAD7
Positive Regulation of Supramolecular Fiber Organization (GO:1902905)	1/98	0.367374	0.410339	0	0	2.21986	2.22291	CFL2
rRNA Metabolic Process (GO:0016072)	1/98	0.367374	0.410339	0	0	2.21986	2.22291	FBL
Negative Regulation of Signal Transduction (GO:0009968)	2/277	0.369876	0.411874	0	0	1.56899	1.5605	NR1D1;SULF1
Positive Regulation of Autophagy (GO:0010508)	1/99	0.37033	0.411874	0	0	2.19709	2.18251	ROCK1
Positive Regulation of Cold-Induced Thermogenesis (GO:0120162)	1/99	0.37033	0.411874	0	0	2.19709	2.18251	OGT
Positive Regulation of Neuron Projection Development (GO:0010976)	1/99	0.37033	0.411874	0	0	2.19709	2.18251	PTPRD
Cytoplasmic Translation (GO:0002181)	1/101	0.376202	0.417512	0	0	2.15293	2.10477	RPL10A
Recombinational Repair (GO:0000725)	1/101	0.376202	0.417512	0	0	2.15293	2.10477	CHD4
Regulation of Macroautophagy (GO:0016241)	1/106	0.390644	0.433078	0	0	2.0499	1.92682	ATP6V0B
Axon Development (GO:0061564)	1/107	0.393493	0.435309	0	0	2.03046	1.89379	FGFR2
Protein Catabolic Process (GO:0030163)	1/107	0.393493	0.435309	0	0	2.03046	1.89379	NR1D1
Positive Regulation of Translation (GO:0045727)	1/108	0.396328	0.437981	0	0	2.01138	1.86155	OGT
Positive Regulation of Vasculature Development (GO:1904018)	1/109	0.399151	0.440632	0	0	1.99265	1.83009	PTGIS
rRNA Processing (GO:0006364)	1/110	0.40196	0.443263	0	0	1.97427	1.79936	FBL
Positive Regulation of T Cell Activation (GO:0050870)	1/111	0.404756	0.445403	0	0	1.95623	1.76935	YWHAG
Positive Regulation of Cellular Component Organization (GO:0051130)	1/111	0.404756	0.445403	0	0	1.95623	1.76935	ANXA2
T Cell Activation (GO:0042110)	1/114	0.413068	0.45359	0	0	1.904	1.68341	DPP4
Double-Strand Break Repair via Homologous Recombination (GO:0000724)	1/114	0.413068	0.45359	0	0	1.904	1.68341	CHD4
Positive Regulation of Inflammatory Response (GO:0050729)	1/115	0.415812	0.455643	0	0	1.8872	1.65606	PDCD4
Regulation of JNK Cascade (GO:0046328)	1/115	0.415812	0.455643	0	0	1.8872	1.65606	PER1
Protein Complex Oligomerization (GO:0051259)	1/116	0.418545	0.457673	0	0	1.8707	1.62933	MAT2A
Regulation of DNA Metabolic Process (GO:0051052)	1/116	0.418545	0.457673	0	0	1.8707	1.62933	LMNA
Positive Regulation of Cell Cycle Process (GO:0090068)	1/119	0.426666	0.466064	0	0	1.82286	1.55263	RHOA
Ribonucleoprotein Complex Biogenesis (GO:0022613)	1/120	0.429347	0.467522	0	0	1.80745	1.52818	FBL
Mitotic Sister Chromatid Segregation (GO:0000070)	1/120	0.429347	0.467522	0	0	1.80745	1.52818	RHOA
Negative Regulation of Catabolic Process (GO:0009895)	1/120	0.429347	0.467522	0	0	1.80745	1.52818	MCL1
Regulation of Cell Cycle (GO:0051726)	2/318	0.436678	0.475008	0	0	1.36257	1.12897	SON;FGFR2
Protein-Containing Complex Organization (GO:0043933)	1/123	0.437319	0.475208	0	0	1.76274	1.45795	SMAD7
Monocarboxylic Acid Metabolic Process (GO:0032787)	1/127	0.447777	0.485558	0	0	1.70644	1.37105	MTHFD1L
Negative Regulation of MAPK Cascade (GO:0043409)	1/127	0.447777	0.485558	0	0	1.70644	1.37105	PER1
RNA Biosynthetic Process (GO:0032774)	1/128	0.450361	0.487852	0	0	1.69291	1.35045	HNRNPDL
Regulation of Neuron Apoptotic Process (GO:0043523)	1/129	0.452933	0.48962	0	0	1.6796	1.33026	MCL1
Regulation of Protein Catabolic Process (GO:0042176)	1/129	0.452933	0.48962	0	0	1.6796	1.33026	RHBDF1
Positive Regulation of Defense Response (GO:0031349)	1/130	0.455494	0.491877	0	0	1.6665	1.31049	PDCD4
Epithelial Cell Differentiation (GO:0030855)	1/132	0.460579	0.496338	0	0	1.64089	1.27213	FGFR2
Protein Localization to Plasma Membrane (GO:0072659)	1/132	0.460579	0.496338	0	0	1.64089	1.27213	ROCK1
Mitochondrion Organization (GO:0007005)	1/135	0.468119	0.503942	0	0	1.60391	1.21742	MCL1
Protein Localization to Cell Periphery (GO:1990778)	1/136	0.470609	0.505055	0	0	1.59195	1.1999	ROCK1
Protein Targeting (GO:0006605)	1/136	0.470609	0.505055	0	0	1.59195	1.1999	GOLPH3
Receptor-Mediated Endocytosis (GO:0006898)	1/136	0.470609	0.505055	0	0	1.59195	1.1999	DPP4
protein-RNA Complex Assembly (GO:0022618)	1/138	0.475554	0.509837	0	0	1.56855	1.16586	COLEC12
Membraneless Organelle Assembly (GO:0140694)	1/139	0.47801	0.511943	0	0	1.5571	1.14934	ATXN2L
Protein Autophosphorylation (GO:0046777)	1/140	0.480454	0.514032	0	0	1.54582	1.13313	FGFR2
Plasma Membrane Bounded Cell Projection Organization (GO:0120036)	1/141	0.482887	0.515575	0	0	1.5347	1.11722	ROCK1
Cellular Response to Starvation (GO:0009267)	1/141	0.482887	0.515575	0	0	1.5347	1.11722	YWHAG
Regulation of Cell Adhesion (GO:0030155)	1/142	0.485309	0.51763	0	0	1.52374	1.10162	ROCK1
Negative Regulation of Protein Metabolic Process (GO:0051248)	1/146	0.494884	0.526763	0	0	1.48141	1.04207	ROCK1
Regulation of Cell Cycle Process (GO:0010564)	1/146	0.494884	0.526763	0	0	1.48141	1.04207	AHCTF1
Positive Regulation of Metabolic Process (GO:0009893)	1/147	0.49725	0.528741	0	0	1.47119	1.02786	OGT
Positive Regulation of MAPK Cascade (GO:0043410)	2/362	0.503991	0.53458	0	0	1.19335	0.817678	ROCK1;FGFR2
Phosphate-Containing Compound Metabolic Process (GO:0006796)	1/150	0.504282	0.53458	0	0	1.44135	0.986774	PTPRD
Cellular Response to Growth Factor Stimulus (GO:0071363)	1/150	0.504282	0.53458	0	0	1.44135	0.986774	DDX18
Adenylate Cyclase-Activating G Protein-Coupled Receptor Signaling Pathway (GO:0007189)	1/153	0.511218	0.540831	0	0	1.41269	0.947856	ADGRE5
Positive Regulation of ERK1 and ERK2 Cascade (GO:0070374)	1/153	0.511218	0.540831	0	0	1.41269	0.947856	FGFR2
Protein Localization (GO:0008104)	2/371	0.517122	0.546521	0	0	1.1637	0.767436	LMNA;YWHAG
Regulation of Small GTPase Mediated Signal Transduction (GO:0051056)	1/157	0.520316	0.549339	0	0	1.37618	0.899089	OGT
Neuron Development (GO:0048666)	1/159	0.524801	0.552954	0	0	1.35863	0.875955	ROCK1
Regulation of Cellular Component Organization (GO:0051128)	1/159	0.524801	0.552954	0	0	1.35863	0.875955	ROCK1
Ribosome Biogenesis (GO:0042254)	1/161	0.529246	0.557073	0	0	1.34151	0.853605	FBL
+ Reg of Phosphatidylinositol 3-Kinase/Prot Kinase B Signal Transduction (GO:0051897)	1/162	0.531453	0.558267	0	0	1.33311	0.842713	AXL
Macroautophagy (GO:0016236)	1/162	0.531453	0.558267	0	0	1.33311	0.842713	OGT
Positive Regulation of Response to External Stimulus (GO:0032103)	1/163	0.533649	0.560009	0	0	1.32481	0.832004	PDCD4
Regulation of Macromolecule Biosynthetic Process (GO:0010556)	1/170	0.548742	0.575268	0	0	1.26949	0.761853	HNRNPDL
RNA Splicing, via Transesterification Reactions With Bulged Adenosine as Nucleophile (GO:0000377)	1/171	0.550859	0.575747	0	0	1.26196	0.752476	DDX5
Cell-Cell Adhesion via Plasma-Membrane Adhesion Molecules (GO:0098742)	1/171	0.550859	0.575747	0	0	1.26196	0.752476	PTPRD
Heart Development (GO:0007507)	1/171	0.550859	0.575747	0	0	1.26196	0.752476	FLRT2
Regulation of Cytokine Production (GO:0001817)	1/172	0.552965	0.57679	0	0	1.25451	0.743249	PER1
Nitrogen Compound Transport (GO:0071705)	1/172	0.552965	0.57679	0	0	1.25451	0.743249	SLC15A2
Double-Strand Break Repair (GO:0006302)	1/176	0.561294	0.584892	0	0	1.22559	0.707791	CHD4
Positive Regulation of Multicellular Organismal Process (GO:0051240)	2/407	0.567332	0.590593	0	0	1.05831	0.599861	ROCK1;OGT
Positive Regulation of Catabolic Process (GO:0009896)	1/183	0.575501	0.598498	0	0	1.17803	0.65088	ROCK1
Anterograde Trans-Synaptic Signaling (GO:0098916)	1/189	0.587316	0.610176	0	0	1.14009	0.606746	PDE7B
Regulation of Programmed Cell Death (GO:0043067)	1/195	0.598806	0.621492	0	0	1.10449	0.566404	MCL1
Positive Regulation of Gene Expression (GO:0010628)	2/436	0.605014	0.62731	0	0	0.986124	0.495532	ROCK1;OGT
Organelle Organization (GO:0006996)	2/437	0.606268	0.627383	0	0	0.983807	0.492329	RAB30;GOLPH3
Protein Localization to Membrane (GO:0072657)	1/199	0.606289	0.627383	0	0	1.08196	0.541411	ROCK1
Axonogenesis (GO:0007409)	1/200	0.608138	0.628048	0	0	1.07647	0.535385	FGFR2
Transcription by RNA Polymerase II (GO:0006366)	1/200	0.608138	0.628048	0	0	1.07647	0.535385	ANXA2
Regulation of Translation (GO:0006417)	1/201	0.609979	0.629324	0	0	1.07103	0.529444	OGT
Negative Regulation of Macromolecule Biosynthetic Process (GO:0010558)	1/202	0.611811	0.629343	0	0	1.06565	0.523588	CHD4
Adenylate Cyclase-Modulating G Protein-Coupled Receptor Signaling Pathway (GO:0007188)	1/202	0.611811	0.629343	0	0	1.06565	0.523588	ADGRE5
Positive Regulation of Protein Metabolic Process (GO:0051247)	1/202	0.611811	0.629343	0	0	1.06565	0.523588	OGT
DNA-templated Transcription (GO:0006351)	1/203	0.613634	0.630596	0	0	1.06032	0.517814	DDX5
Neuron Projection Development (GO:0031175)	1/206	0.619054	0.635538	0	0	1.04464	0.500972	ROCK1
mRNA Splicing, via Spliceosome (GO:0000398)	1/211	0.627921	0.644005	0	0	1.01951	0.474422	DDX5
Regulation of RNA Biosynthetic Process (GO:2001141)	2/465	0.640199	0.655952	0	0	0.922982	0.411628	BHLHE40;AEBP1
Regulation of Phosphatidylinositol 3-Kinase/Protein Kinase B Signal Transduction (GO:0051896)	1/219	0.641684	0.656827	0	0	0.981701	0.435541	AXL
Regulation of ERK1 and ERK2 Cascade (GO:0070372)	1/223	0.648375	0.663024	0	0	0.963817	0.417608	FGFR2
Nervous System Development (GO:0007399)	2/480	0.657425	0.671618	0	0	0.893328	0.374684	PTPRD;AXL
Apoptotic Process (GO:0006915)	1/232	0.662983	0.67597	0	0	0.925842	0.380527	OGT
Translation (GO:0006412)	1/232	0.662983	0.67597	0	0	0.925842	0.380527	RPL10A
Positive Regulation of Developmental Process (GO:0051094)	1/245	0.683029	0.695727	0	0	0.875935	0.333923	OGT
Lipid Metabolic Process (GO:0006629)	1/259	0.703298	0.715673	0	0	0.827814	0.291369	PLA1A
Chemical Synaptic Transmission (GO:0007268)	1/260	0.704696	0.716395	0	0	0.824576	0.288592	PDE7B
Inflammatory Response (GO:0006954)	1/261	0.706087	0.717109	0	0	0.821363	0.285848	ADGRE5
Protein Modification Process (GO:0036211)	2/545	0.724622	0.735215	0	0	0.783761	0.252454	PLOD2;MAN2B1
Plasma Membrane Bounded Cell Projection Assembly (GO:0120031)	1/277	0.727485	0.737402	0	0	0.773118	0.245976	GOLPH3
Positive Regulation of Cell Differentiation (GO:0045597)	1/297	0.752077	0.761588	0	0	0.720145	0.205181	RHOA
Monoatomic Cation Transmembrane Transport (GO:0098655)	1/304	0.760155	0.769019	0	0	0.703257	0.192857	ATP6V0B
Inorganic Cation Transmembrane Transport (GO:0098662)	1/307	0.763536	0.771691	0	0	0.696256	0.187846	ATP6V0B
Protein Transport (GO:0015031)	1/308	0.764653	0.77207	0	0	0.693953	0.186211	GOLPH3
Protein-Containing Complex Assembly (GO:0065003)	1/323	0.780791	0.7876	0	0	0.661119	0.163593	KRIT1
Positive Regulation of Cytokine Production (GO:0001819)	1/325	0.782858	0.788921	0	0	0.656971	0.160829	SULF1
Intracellular Protein Transport (GO:0006886)	1/326	0.783884	0.789191	0	0	0.654916	0.159468	KPNA4
Positive Regulation of Cellular Process (GO:0048522)	2/622	0.789648	0.794225	0	0	0.683694	0.161467	DPP4;FGFR2
Positive Regulation of Cell Migration (GO:0030335)	1/344	0.801559	0.805428	0	0	0.619977	0.137137	CAPN7
Positive Regulation of Macromolecule Biosynthetic Process (GO:0010557)	1/355	0.811649	0.81478	0	0	0.600375	0.125291	ROCK1
Proteasomal Protein Catabolic Process (GO:0010498)	1/372	0.826252	0.82864	0	0	0.572366	0.109239	NR1D1
Negative Regulation of Cell Population Proliferation (GO:0008285)	1/379	0.831934	0.833536	0	0	0.561565	0.103329	LMNA
DNA Damage Response (GO:0006974)	1/421	0.862365	0.863195	0	0	0.504322	0.0746781	MCL1
Negative Regulation of Cellular Process (GO:0048523)	1/531	0.918598	0.918598	0	0	0.397395	0.0337416	LMNA
