# Supplementary material for: Cardiorenal heart failure with preserved ejection fraction is caused by a reversible rise of mineralocorticoid-induced fibroblast subtypes
Source: Research Square preprint supplement (doi:10.21203/rs.3.rs-7039115/v1), 2025-07-14
Supplement: Supplementary file 12 [file fc217daffb974f46ff87aa2b.xlsx]

## Sheet: Echo+HW
Group	Genotype	sex	number of mice (n)	LAAs (mm²)	CO (ml/min)	SV (µl)	HR (bpm)	MV-E´/A´	MV-E/E´	LVAWd (mm) SAX	LVAWs (mm) SAX	LVIDd (mm) SAX	LVIDs (mm) SAX	LVPWd (mm) SAX	LVPWs (mm) SAX	EF (%)	FS (%)	arrhythmia (%)	HW/TL (mg/mm)
CTRL	MR-WT	f	3	4.5±0.16	25.08±3.1	61.29±7.97		1.23±0.13	22.75±1.07	0.81±0.03	1.29±0.07	3.74±0.04	2.21±0.14	0.72±0.02	1.19±0.05	71.98±4.51	40.82±3.92		69.11±2.98
	MR-WT	m	3, except MV-E´/A´	4.43±0.48	30.45±3.78	78.4±10.56		1.01 (n=1)	24±2.52	0.98±0.03	1.47±0.07	4.3±0.17	2.83±0.3	0.78±0.05	1.14±0.07	63.3±6.18	34.42±4.26		71.62±1.2
	MR-KO	f	3, except MV-E´/A´	4.55±0.27	27.16±0.38	72.79±1.68			24.41±2.79	0.87±0.02	1.34±0.1	4.07±0.19	2.68±0.22	0.76±0.05	1.11±0.1	63.76±3.51	34.37±2.53		63.49±2.16
	MR-KO	m	3, except MV-E´/A´	4.53±0.29	27.31±2.35	69.63±6.67		1.42±0.33 (n=2)	23.6±1.91	0.85±0.06	1.36±0.02	4.13±0.12	2.76±0.22	0.74±0.02	1.17±0.03	62.38±4.82	33.5±3.3		71.03±1.54
ALDO	MR-WT	f	3	5.63±0.23	32.8±3.76	86.75±8.32		2.27±0.31	31.14±1.13	1±0.03	1.53±0.05	3.72±0.03	2.3±0.09	0.89±0.04	1.34±0.07	69.01±3.55	38.18±2.77		81.85±3.28
	MR-WT	m	3, except MV-E´/A´	5.96±0.22	38±3.32	99.66±9.42		1.92±0.67 (n=2)	31.05±1.66	0.94±0.05	1.47±0.07	3.92±0.08	2.47±0.14	0.95±0.06	1.36±0.11	67.44±3.33	37.07±2.63		90±5.97
	MR-KO	f	3, except MV-E´/A´	4.62±0.09	31.08±3.86	82.06±10.59		1.56±0.21 (n=2)	26.33±0.64	0.91±0.06	1.45±0.08	3.84±0.18	2.38±0.2	0.72±0.05	1.19±0.04	69.01±3.71	38.29±2.96		75.85±0.54
	MR-KO	m	3, except MV-E´/A´	4.26±0.24	42.82±2.71	110.99±4.36			25.1±1	1.04±0.06	1.67±0.11	4.29±0.22	2.69±0.31	0.81±0.05	1.32±0.07	67.56±5.25	37.59±3.89		78.89±2.67
