# Supplementary material for: Cardiorenal heart failure with preserved ejection fraction is caused by a reversible rise of mineralocorticoid-induced fibroblast subtypes
Source: Research Square preprint supplement (doi:10.21203/rs.3.rs-7039115/v1), 2025-07-14
Supplement: Supplementary file 13 [file fcea2dfb03d79f591f516974.xlsx]

## Sheet: all.markers_CM
	p_val	avg_log2FC	pct.1	pct.2	p_val_adj	cluster	gene
Uty	0	0.579269	0.432	0.162	0	CM_0	Uty
Nr4a1	0	0.429198	0.282	0.082	0	CM_0	Nr4a1
Rhobtb1	0	0.421026	0.834	0.626	0	CM_0	Rhobtb1
Art3	0	0.410354	0.757	0.535	0	CM_0	Art3
Coq10b	0	0.351027	0.561	0.319	0	CM_0	Coq10b
Usp2	0	0.314235	0.742	0.489	0	CM_0	Usp2
Ddx3y	0	0.304926	0.253	0.086	0	CM_0	Ddx3y
Tob2	0	0.302947	0.527	0.306	0	CM_0	Tob2
Mt1	0	0.280522	0.239	0.068	0	CM_0	Mt1
Ciart	0	0.255456	0.193	0.064	0	CM_0	Ciart
Sorbs1	0	0.250718	0.997	0.952	0	CM_0	Sorbs1
Cryab	0	0.25065	0.217	0.046	0	CM_0	Cryab
Lncpint	1.59e-292	0.31363	0.974	0.857	5.31e-288	CM_0	Lncpint
Xist	8.41e-292	-0.645138	0.356	0.539	2.81e-287	CM_0	Xist
Astn2	4.7e-283	0.371704	0.275	0.124	1.57e-278	CM_0	Astn2
Amd1	3.51e-277	0.28253	0.455	0.26	1.17e-272	CM_0	Amd1
Gck	3.72e-274	0.259778	0.291	0.135	1.24e-269	CM_0	Gck
Myl3	2.05e-271	-0.559613	0.242	0.096	6.86e-267	CM_0	Myl3
Tlr4	5.3e-267	0.324228	0.666	0.452	1.77e-262	CM_0	Tlr4
Resf1	1.2e-266	0.43615	0.397	0.226	4.01e-262	CM_0	Resf1
Ccnd3	3.89e-261	0.253735	0.197	0.075	1.3e-256	CM_0	Ccnd3
Zbtb16	1.33e-251	0.310834	0.891	0.72	4.44e-247	CM_0	Zbtb16
Ankrd1	5.54e-248	0.474505	0.474	0.295	1.85e-243	CM_0	Ankrd1
Fhit	1.93e-241	0.317476	0.67	0.467	6.45e-237	CM_0	Fhit
Tfdp2	1.22e-213	0.26386	0.775	0.576	4.07e-209	CM_0	Tfdp2
Lrmda	7.59e-204	0.337211	0.393	0.236	2.54e-199	CM_0	Lrmda
Pdlim5	2.65e-198	0.305154	0.967	0.87	8.85e-194	CM_0	Pdlim5
Ces1d	4.74e-182	0.278911	0.34	0.201	1.58e-177	CM_0	Ces1d
Shld1	8.56e-166	0.353711	0.587	0.437	2.86e-161	CM_0	Shld1
Gpcpd1	3.79e-136	0.25231	0.914	0.796	1.27e-131	CM_0	Gpcpd1
Dlc1	2.14e-130	-0.346177	0.956	0.903	7.16e-126	CM_0	Dlc1
Camk1d	5.81e-90	-0.833552	0.208	0.292	1.94e-85	CM_0	Camk1d
Cmss1	6.17e-29	-0.340832	0.85	0.671	2.06e-24	CM_0	Cmss1
AY036118	3.61e-28	-0.987116	0.188	0.221	1.21e-23	CM_0	AY036118
Plpp3	7.84e-25	-0.297535	0.097	0.126	2.62e-20	CM_0	Plpp3
Pdzrn4	6.69e-20	-0.420765	0.514	0.503	2.24e-15	CM_0	Pdzrn4
Peak1	1.93e-16	-0.285191	0.607	0.488	6.45e-12	CM_0	Peak1
Lhfp	9.31e-14	-0.295874	0.548	0.521	3.11e-09	CM_0	Lhfp
Rgs6	2.31e-12	-0.471564	0.764	0.68	7.73e-08	CM_0	Rgs6
Lars2	2.34e-10	-0.555331	0.217	0.226	7.81e-06	CM_0	Lars2
Adra1b	3.59e-10	-0.268324	0.313	0.313	1.2e-05	CM_0	Adra1b
Gm48099	3.65e-09	-0.273504	0.103	0.116	0.00012203	CM_0	Gm48099
Rbfox1	1.94e-07	-0.276688	0.914	0.826	0.00648589	CM_0	Rbfox1
Ror1	1.55e-06	-0.323717	0.578	0.523	0.0517923	CM_0	Ror1
Gm42418	5.15e-06	-0.6957	0.48	0.477	0.172065	CM_0	Gm42418
Xist.1	0	0.635534	0.66	0.358	0	CM_1	Xist
Dlc1.1	0	0.562688	0.968	0.904	0	CM_1	Dlc1
Slc8a1	0	0.488544	0.997	0.97	0	CM_1	Slc8a1
Ryr2	0	0.444793	0.997	0.982	0	CM_1	Ryr2
Inpp4b	0	0.404523	0.89	0.766	0	CM_1	Inpp4b
Esrrg	0	0.357005	0.992	0.938	0	CM_1	Esrrg
Dip2c	0	0.344637	0.979	0.906	0	CM_1	Dip2c
Pcdh7	0	0.33063	0.994	0.962	0	CM_1	Pcdh7
Sox6	0	0.32827	0.979	0.902	0	CM_1	Sox6
Uqcrh	0	-0.506661	0.022	0.17	0	CM_1	Uqcrh
Mt1.1	0	-0.559269	0.042	0.193	0	CM_1	Mt1
Tnnt2	0	-0.588074	0.965	0.979	0	CM_1	Tnnt2
Myl6	0	-0.600587	0.005	0.119	0	CM_1	Myl6
Rsrp1	0	-0.603031	0.708	0.813	0	CM_1	Rsrp1
Ddx5	0	-0.603876	0.746	0.84	0	CM_1	Ddx5
Atp5d	0	-0.613605	0.01	0.145	0	CM_1	Atp5d
Cryab.1	0	-0.636841	0.013	0.174	0	CM_1	Cryab
Dmpk	0	-0.664294	0.648	0.769	0	CM_1	Dmpk
Neat1	0	-0.683664	0.925	0.962	0	CM_1	Neat1
Mybpc3	0	-0.685526	0.774	0.87	0	CM_1	Mybpc3
Coro6	0	-0.734699	0.745	0.843	0	CM_1	Coro6
Ckm	0	-0.760678	0.036	0.201	0	CM_1	Ckm
Tcap	0	-0.763188	0.453	0.695	0	CM_1	Tcap
Crip2	0	-0.810602	0.284	0.499	0	CM_1	Crip2
Myl2	0	-1.1523	0.368	0.616	0	CM_1	Myl2
Actc1	0	-1.19612	0.195	0.497	0	CM_1	Actc1
Tnni3	0	-1.205	0.186	0.441	0	CM_1	Tnni3
Myl3.1	0	-1.62575	0.009	0.235	0	CM_1	Myl3
Atp5b	1.75e-307	-0.672711	0.086	0.248	5.86e-303	CM_1	Atp5b
Des	1.61e-300	-0.675954	0.204	0.388	5.37e-296	CM_1	Des
Uty.1	5.05e-300	-0.547516	0.157	0.34	1.69e-295	CM_1	Uty
Srsf5	2.74e-299	-0.73997	0.203	0.381	9.16e-295	CM_1	Srsf5
Idh2	4.2e-283	-0.625475	0.439	0.61	1.4e-278	CM_1	Idh2
Qk	1.09e-277	0.305786	0.977	0.899	3.64e-273	CM_1	Qk
Slc25a4	7.27e-272	-0.788842	0.2	0.377	2.43e-267	CM_1	Slc25a4
Fgf13	1.13e-270	0.293122	0.977	0.941	3.77e-266	CM_1	Fgf13
Pde4b	4.98e-261	0.324658	0.979	0.918	1.66e-256	CM_1	Pde4b
Nr4a1.1	1.97e-259	-0.531774	0.079	0.214	6.58e-255	CM_1	Nr4a1
Cdh2	4.73e-251	0.31132	0.982	0.915	1.58e-246	CM_1	Cdh2
Zfpm2	8.91e-247	0.291527	0.97	0.895	2.98e-242	CM_1	Zfpm2
Fign	2.54e-243	0.384052	0.816	0.685	8.51e-239	CM_1	Fign
Pdzrn4.1	2.08e-242	0.659118	0.605	0.458	6.95e-238	CM_1	Pdzrn4
Ralgapa2	7.84e-236	0.285469	0.974	0.9	2.62e-231	CM_1	Ralgapa2
Kcnj3	5.25e-231	0.416184	0.862	0.757	1.75e-226	CM_1	Kcnj3
Rcan2	1.2e-229	0.252698	0.989	0.933	4.01e-225	CM_1	Rcan2
Actg1	9.96e-228	-0.600472	0.374	0.534	3.33e-223	CM_1	Actg1
Son	1.22e-226	-0.45512	0.893	0.894	4.08e-222	CM_1	Son
Ankrd1.1	5.65e-225	-0.810069	0.269	0.425	1.89e-220	CM_1	Ankrd1
Sgcd	1.68e-222	0.280357	0.97	0.894	5.61e-218	CM_1	Sgcd
Tead1	3.17e-221	0.342433	0.879	0.776	1.06e-216	CM_1	Tead1
Itgb6	3.18e-220	0.369483	0.773	0.637	1.06e-215	CM_1	Itgb6
Eef1a2	9.28e-218	-0.492363	0.114	0.255	3.1e-213	CM_1	Eef1a2
Bsg	1.48e-216	-0.505185	0.079	0.204	4.94e-212	CM_1	Bsg
Cox6b1	1.84e-216	-0.339402	0.013	0.101	6.14e-212	CM_1	Cox6b1
Camk2d	3.83e-214	0.27281	0.963	0.883	1.28e-209	CM_1	Camk2d
Rreb1	1.61e-213	0.352442	0.79	0.664	5.38e-209	CM_1	Rreb1
Dbp	3.66e-213	-0.553135	0.213	0.362	1.22e-208	CM_1	Dbp
Pbx1	1.33e-212	0.272414	0.968	0.894	4.45e-208	CM_1	Pbx1
Fabp3	1.28e-211	-0.592379	0.15	0.3	4.29e-207	CM_1	Fabp3
Art1	1.75e-208	-0.431523	0.815	0.849	5.84e-204	CM_1	Art1
Grb14	3.7e-207	0.352131	0.859	0.752	1.24e-202	CM_1	Grb14
Alpk2	8.93e-204	0.36981	0.758	0.631	2.99e-199	CM_1	Alpk2
Per1	4.95e-202	-0.422991	0.091	0.212	1.66e-197	CM_1	Per1
Cpeb3	1.29e-200	0.30476	0.973	0.911	4.32e-196	CM_1	Cpeb3
Ccnd3.1	2.97e-200	-0.445522	0.056	0.164	9.93e-196	CM_1	Ccnd3
Ndrg2	3.1e-200	-0.528193	0.391	0.535	1.04e-195	CM_1	Ndrg2
Eif2s3y	3.23e-196	-0.364727	0.064	0.175	1.08e-191	CM_1	Eif2s3y
Setbp1	6.87e-195	0.31986	0.876	0.768	2.3e-190	CM_1	Setbp1
Ddx3y.1	9.39e-195	-0.35771	0.08	0.198	3.14e-190	CM_1	Ddx3y
Serf2	1.93e-194	-0.334757	0.029	0.123	6.47e-190	CM_1	Serf2
Ghr	7.41e-191	0.263197	0.971	0.908	2.48e-186	CM_1	Ghr
Gm30382	9.83e-190	0.343093	0.863	0.767	3.29e-185	CM_1	Gm30382
Adra1b.1	8.83e-188	0.392642	0.402	0.267	2.95e-183	CM_1	Adra1b
Ror1.1	3.95e-187	0.446502	0.633	0.503	1.32e-182	CM_1	Ror1
Gpsm1	1.34e-185	-0.53256	0.24	0.382	4.48e-181	CM_1	Gpsm1
Rgs6.1	7e-185	0.37204	0.78	0.684	2.34e-180	CM_1	Rgs6
Ano4	1.37e-184	0.397537	0.743	0.63	4.57e-180	CM_1	Ano4
Ehbp1	1.6e-184	0.268597	0.962	0.886	5.33e-180	CM_1	Ehbp1
Macf1	1.53e-182	0.275522	0.945	0.87	5.11e-178	CM_1	Macf1
Fxyd1	4.22e-181	-0.492663	0.213	0.359	1.41e-176	CM_1	Fxyd1
Art3.1	4.73e-181	-0.549116	0.568	0.663	1.58e-176	CM_1	Art3
Tmem65	8.27e-178	0.326394	0.766	0.645	2.76e-173	CM_1	Tmem65
Srsf2	1.01e-175	-0.548055	0.458	0.588	3.39e-171	CM_1	Srsf2
Prox1	2.67e-175	0.344257	0.589	0.457	8.91e-171	CM_1	Prox1
Ivns1abp	1.17e-174	-0.354032	0.916	0.926	3.9e-170	CM_1	Ivns1abp
Hspb7	4.56e-173	-0.464102	0.199	0.335	1.52e-168	CM_1	Hspb7
Usp2.1	2.74e-169	-0.452387	0.527	0.634	9.14e-165	CM_1	Usp2
Lhfp.1	2.95e-169	0.395028	0.617	0.49	9.85e-165	CM_1	Lhfp
Phactr2	3.22e-168	0.300881	0.86	0.771	1.08e-163	CM_1	Phactr2
Atp5j	1.34e-167	-0.343152	0.032	0.116	4.47e-163	CM_1	Atp5j
Atp5h	2.31e-167	-0.402454	0.037	0.125	7.72e-163	CM_1	Atp5h
Mef2a	4.22e-167	0.277999	0.863	0.759	1.41e-162	CM_1	Mef2a
Tmem259	3.93e-165	-0.377276	0.112	0.229	1.31e-160	CM_1	Tmem259
Arglu1	5.84e-162	-0.45279	0.141	0.263	1.95e-157	CM_1	Arglu1
Ciart.1	3.27e-161	-0.356551	0.058	0.151	1.09e-156	CM_1	Ciart
Angpt1	5.71e-161	0.618186	0.666	0.567	1.91e-156	CM_1	Angpt1
Gm49708	1.81e-160	0.3523	0.709	0.587	6.05e-156	CM_1	Gm49708
AC149090.1	1.65e-159	-0.43492	0.172	0.295	5.51e-155	CM_1	AC149090.1
Kdm5d	1.61e-158	-0.25777	0.05	0.141	5.37e-154	CM_1	Kdm5d
Rbfox2	1.46e-157	0.288322	0.8	0.692	4.87e-153	CM_1	Rbfox2
Grina	2.66e-157	-0.357941	0.064	0.16	8.89e-153	CM_1	Grina
Meis1	2.86e-156	0.304225	0.724	0.61	9.56e-152	CM_1	Meis1
Gm26917	3.48e-156	-0.684163	0.487	0.594	1.16e-151	CM_1	Gm26917
Pip5k1b	1.5e-155	0.282232	0.872	0.77	5.01e-151	CM_1	Pip5k1b
Vegfa	2.63e-152	-0.400575	0.807	0.861	8.8e-148	CM_1	Vegfa
Ppp1r14c	5.01e-151	0.275007	0.863	0.772	1.67e-146	CM_1	Ppp1r14c
Lpp	1.13e-150	0.28482	0.847	0.751	3.78e-146	CM_1	Lpp
Trip10	3.33e-148	-0.456764	0.206	0.328	1.11e-143	CM_1	Trip10
Meis2	8.66e-148	0.261596	0.873	0.769	2.89e-143	CM_1	Meis2
Leng8	8.66e-148	-0.551108	0.208	0.33	2.9e-143	CM_1	Leng8
Lama2	3.03e-147	0.266481	0.939	0.874	1.01e-142	CM_1	Lama2
Phldb1	8.46e-146	-0.464538	0.306	0.429	2.83e-141	CM_1	Phldb1
Gm31013	9.81e-146	0.297088	0.567	0.444	3.28e-141	CM_1	Gm31013
Ech1	2.55e-145	-0.329195	0.042	0.127	8.52e-141	CM_1	Ech1
Irs1	8.92e-145	0.351298	0.498	0.374	2.98e-140	CM_1	Irs1
Slc25a3	2.08e-142	-0.437471	0.495	0.61	6.96e-138	CM_1	Slc25a3
Casq2	1.29e-141	0.2888	0.734	0.621	4.3e-137	CM_1	Casq2
Capns1	3.41e-141	-0.265649	0.029	0.102	1.14e-136	CM_1	Capns1
Cd36	1.75e-139	0.258318	0.951	0.874	5.85e-135	CM_1	Cd36
Hspa9	3.39e-139	-0.387101	0.219	0.344	1.13e-134	CM_1	Hspa9
Tmem117	9.86e-137	0.2574	0.807	0.7	3.3e-132	CM_1	Tmem117
Srsf6	6.73e-136	-0.443843	0.243	0.366	2.25e-131	CM_1	Srsf6
Hnrnpdl	1.08e-135	-0.497879	0.18	0.295	3.62e-131	CM_1	Hnrnpdl
Uqcrc1	2.57e-133	-0.369307	0.12	0.227	8.59e-129	CM_1	Uqcrc1
Lpin1	6.58e-132	0.299328	0.585	0.472	2.2e-127	CM_1	Lpin1
Gm14964	1.1e-130	-0.290134	0.04	0.115	3.68e-126	CM_1	Gm14964
Snrnp70	6.17e-130	-0.44063	0.553	0.647	2.06e-125	CM_1	Snrnp70
Eif4a2	1.02e-129	-0.430069	0.311	0.43	3.42e-125	CM_1	Eif4a2
Hif1a	1.41e-127	0.257667	0.672	0.559	4.71e-123	CM_1	Hif1a
Hnrnph1	1.56e-127	-0.411524	0.157	0.265	5.23e-123	CM_1	Hnrnph1
Tuba4a	1.67e-127	-0.292437	0.04	0.115	5.58e-123	CM_1	Tuba4a
Snhg20	1.13e-125	-0.344965	0.121	0.222	3.78e-121	CM_1	Snhg20
Eif4a1	6.74e-125	-0.255574	0.037	0.11	2.25e-120	CM_1	Eif4a1
Tef	8.97e-125	-0.416419	0.518	0.606	3e-120	CM_1	Tef
Hdac9	1.27e-124	0.269023	0.754	0.659	4.24e-120	CM_1	Hdac9
Pde3a	4.83e-124	0.268077	0.874	0.784	1.61e-119	CM_1	Pde3a
Tns2	5.41e-123	-0.400876	0.203	0.314	1.81e-118	CM_1	Tns2
Atp5l	1.04e-121	-0.384159	0.148	0.254	3.46e-117	CM_1	Atp5l
Cmss1.1	2.12e-121	-0.588835	0.681	0.783	7.08e-117	CM_1	Cmss1
5430431A17Rik	1.09e-120	-0.470584	0.327	0.442	3.65e-116	CM_1	5430431A17Rik
Clk1	5.37e-119	-0.44106	0.367	0.48	1.79e-114	CM_1	Clk1
Itm2b	1.27e-118	-0.327547	0.087	0.175	4.24e-114	CM_1	Itm2b
Atp5a1	5.51e-118	-0.409384	0.331	0.461	1.84e-113	CM_1	Atp5a1
Eno3	3.63e-117	-0.377533	0.166	0.274	1.21e-112	CM_1	Eno3
Trabd2b	5.51e-114	0.250429	0.85	0.766	1.84e-109	CM_1	Trabd2b
Nppb	9.54e-114	-0.379152	0.12	0.215	3.19e-109	CM_1	Nppb
Mast4	2.76e-113	-0.390516	0.319	0.436	9.21e-109	CM_1	Mast4
Idh3g	3.12e-110	-0.276633	0.039	0.106	1.04e-105	CM_1	Idh3g
Gck.1	1.85e-109	-0.327414	0.139	0.234	6.18e-105	CM_1	Gck
Rnf207	2.55e-109	-0.422624	0.683	0.734	8.52e-105	CM_1	Rnf207
Psap	1.54e-106	-0.395953	0.18	0.281	5.16e-102	CM_1	Psap
Med12l	2.03e-105	0.256302	0.617	0.516	6.79e-101	CM_1	Med12l
Usp19	1.45e-103	-0.302863	0.096	0.181	4.83e-99	CM_1	Usp19
Anapc5	3.63e-103	-0.378069	0.212	0.315	1.21e-98	CM_1	Anapc5
Tnnc1	6.46e-103	-0.380683	0.524	0.638	2.16e-98	CM_1	Tnnc1
Ccnl2	6.87e-103	-0.379345	0.55	0.633	2.3e-98	CM_1	Ccnl2
Astn2.1	1e-98	-0.352962	0.131	0.219	3.35e-94	CM_1	Astn2
Epha4	1.86e-97	0.331704	0.506	0.406	6.21e-93	CM_1	Epha4
Slc4a3	7.53e-97	-0.39452	0.537	0.617	2.52e-92	CM_1	Slc4a3
Srrm2	8.51e-97	-0.372272	0.67	0.712	2.84e-92	CM_1	Srrm2
Lamb2	7.6e-96	-0.33526	0.165	0.259	2.54e-91	CM_1	Lamb2
Cdk8	2.23e-95	-0.589521	0.451	0.534	7.47e-91	CM_1	Cdk8
Ptp4a3	2.74e-94	-0.394828	0.196	0.292	9.16e-90	CM_1	Ptp4a3
Gm24474	2.23e-91	0.265047	0.61	0.514	7.44e-87	CM_1	Gm24474
Rbm38	4.04e-90	-0.350737	0.316	0.413	1.35e-85	CM_1	Rbm38
Epn1	5.5e-88	-0.299502	0.135	0.221	1.84e-83	CM_1	Epn1
Lncpint.1	9.97e-88	-0.256339	0.923	0.9	3.33e-83	CM_1	Lncpint
Parp3	1.1e-87	-0.262884	0.113	0.193	3.68e-83	CM_1	Parp3
Agrn	3.45e-87	-0.37916	0.225	0.317	1.15e-82	CM_1	Agrn
Tob2.1	4.35e-87	-0.370836	0.342	0.432	1.45e-82	CM_1	Tob2
AY036118.1	6.18e-87	-1.16125	0.157	0.232	2.06e-82	CM_1	AY036118
Hnrnpk	1.4e-85	-0.287349	0.111	0.189	4.67e-81	CM_1	Hnrnpk
Ndufv1	1.46e-85	-0.25035	0.059	0.124	4.87e-81	CM_1	Ndufv1
Map7d1	2.01e-85	-0.317749	0.206	0.3	6.71e-81	CM_1	Map7d1
Adamtsl4	4.42e-85	-0.319561	0.185	0.273	1.48e-80	CM_1	Adamtsl4
Eif4g1	7.07e-84	-0.326645	0.348	0.444	2.36e-79	CM_1	Eif4g1
U2af2	4.84e-83	-0.260439	0.111	0.188	1.62e-78	CM_1	U2af2
Cox19	5.42e-83	-0.262816	0.121	0.199	1.81e-78	CM_1	Cox19
Rhobtb1.1	6.57e-83	-0.369138	0.696	0.726	2.2e-78	CM_1	Rhobtb1
Fgf14	1.15e-81	0.32076	0.675	0.594	3.86e-77	CM_1	Fgf14
Pacsin3	1.2e-80	-0.318406	0.199	0.287	4.03e-76	CM_1	Pacsin3
BC005537	2.37e-80	-0.310946	0.388	0.478	7.93e-76	CM_1	BC005537
Nisch	9.17e-80	-0.349726	0.428	0.517	3.07e-75	CM_1	Nisch
Mdh2	1.36e-78	-0.260832	0.089	0.161	4.55e-74	CM_1	Mdh2
Sf3b1	5.91e-78	-0.32362	0.449	0.531	1.97e-73	CM_1	Sf3b1
Ogdhl	8.8e-78	-0.26875	0.141	0.221	2.94e-73	CM_1	Ogdhl
Flcn	9.7e-78	-0.331777	0.152	0.231	3.24e-73	CM_1	Flcn
Rrad	5.16e-76	-0.317182	0.224	0.315	1.72e-71	CM_1	Rrad
Inppl1	6.19e-75	-0.294558	0.162	0.242	2.07e-70	CM_1	Inppl1
Gpi1	9.04e-75	-0.275224	0.187	0.272	3.02e-70	CM_1	Gpi1
Slc2a4	1.66e-74	-0.307078	0.198	0.284	5.53e-70	CM_1	Slc2a4
Pdhb	2.37e-74	-0.264356	0.181	0.267	7.92e-70	CM_1	Pdhb
Coq10b.1	3.25e-72	-0.315953	0.368	0.452	1.08e-67	CM_1	Coq10b
Aco2	4.92e-72	-0.287284	0.741	0.768	1.64e-67	CM_1	Aco2
Plin4	2.26e-71	-0.3531	0.344	0.429	7.56e-67	CM_1	Plin4
Herpud1	5.48e-71	-0.277909	0.141	0.216	1.83e-66	CM_1	Herpud1
Ces1d.1	1.66e-70	-0.391164	0.209	0.287	5.54e-66	CM_1	Ces1d
Ddx17	1.51e-69	-0.365229	0.528	0.597	5.06e-65	CM_1	Ddx17
Lgals4	1.82e-68	-0.394901	0.489	0.562	6.09e-64	CM_1	Lgals4
Sdhb	1.87e-68	-0.293495	0.288	0.381	6.23e-64	CM_1	Sdhb
Gm42418.1	5.45e-68	-0.85181	0.458	0.489	1.82e-63	CM_1	Gm42418
Atxn2l	1.5e-67	-0.274124	0.108	0.175	5.02e-63	CM_1	Atxn2l
Flnc	2.68e-67	-0.346863	0.275	0.356	8.95e-63	CM_1	Flnc
Smtn	5.31e-67	-0.294843	0.794	0.822	1.77e-62	CM_1	Smtn
Cpt1b	2.64e-66	-0.400745	0.402	0.473	8.83e-62	CM_1	Cpt1b
Pkm	7.96e-66	-0.291055	0.265	0.352	2.66e-61	CM_1	Pkm
Resf1.1	5.16e-65	-0.432741	0.252	0.324	1.73e-60	CM_1	Resf1
Tcf25	6.43e-65	-0.359143	0.209	0.286	2.15e-60	CM_1	Tcf25
1700025G04Rik	2.27e-64	0.265015	0.407	0.33	7.59e-60	CM_1	1700025G04Rik
Tmem150a	1.8e-62	-0.276097	0.216	0.294	6.02e-58	CM_1	Tmem150a
Fbxo31	1.38e-61	-0.270983	0.197	0.271	4.61e-57	CM_1	Fbxo31
Txnip	5.15e-61	-0.311899	0.444	0.519	1.72e-56	CM_1	Txnip
Cdk14	1.8e-59	-0.386657	0.076	0.131	6.02e-55	CM_1	Cdk14
Adcy6	4.4e-59	-0.334233	0.536	0.596	1.47e-54	CM_1	Adcy6
Cdh4	4.72e-59	-0.291215	0.231	0.307	1.58e-54	CM_1	Cdh4
Aox1	4.97e-57	-0.274639	0.486	0.552	1.66e-52	CM_1	Aox1
Zbtb16.1	5.59e-57	-0.321675	0.796	0.793	1.87e-52	CM_1	Zbtb16
Amd1.1	1.61e-55	-0.298501	0.297	0.368	5.4e-51	CM_1	Amd1
Slc38a3	1.87e-55	-0.281777	0.329	0.405	6.26e-51	CM_1	Slc38a3
Ddx39b	5.81e-55	-0.285487	0.183	0.252	1.94e-50	CM_1	Ddx39b
Echdc2	5.43e-54	-0.285333	0.218	0.29	1.82e-49	CM_1	Echdc2
Trim54	6.26e-52	-0.266772	0.557	0.607	2.09e-47	CM_1	Trim54
Tecr	9.42e-52	-0.278328	0.385	0.46	3.15e-47	CM_1	Tecr
Bckdha	1.46e-51	-0.266431	0.253	0.325	4.86e-47	CM_1	Bckdha
Lrmda.1	8.92e-51	-0.290748	0.255	0.329	2.98e-46	CM_1	Lrmda
Atad3a	3.17e-50	-0.25077	0.279	0.352	1.06e-45	CM_1	Atad3a
Ahnak	4.55e-50	-0.356822	0.186	0.248	1.52e-45	CM_1	Ahnak
Csrp3	1.75e-49	-0.33479	0.465	0.531	5.85e-45	CM_1	Csrp3
Got1	1.93e-49	-0.275319	0.336	0.411	6.44e-45	CM_1	Got1
Carns1	3.98e-49	-0.313432	0.354	0.42	1.33e-44	CM_1	Carns1
Klc1	4.81e-47	-0.310187	0.264	0.335	1.61e-42	CM_1	Klc1
Chkb	7.54e-47	-0.281868	0.162	0.223	2.52e-42	CM_1	Chkb
Chd4	9.21e-47	-0.280217	0.4	0.461	3.08e-42	CM_1	Chd4
Sqstm1	4.19e-46	-0.26311	0.268	0.336	1.4e-41	CM_1	Sqstm1
Srsf1	5.89e-46	-0.262883	0.266	0.335	1.97e-41	CM_1	Srsf1
Tmem82	1.01e-45	-0.273119	0.159	0.217	3.38e-41	CM_1	Tmem82
Hnrnpa2b1	1.81e-45	-0.268971	0.359	0.432	6.05e-41	CM_1	Hnrnpa2b1
Pnpla7	4.9e-45	-0.2629	0.348	0.415	1.64e-40	CM_1	Pnpla7
Car14	8.06e-44	-0.263814	0.237	0.303	2.69e-39	CM_1	Car14
Pnisr	1.24e-43	-0.261172	0.57	0.615	4.15e-39	CM_1	Pnisr
Gm17428	2.51e-43	-0.369888	0.689	0.717	8.38e-39	CM_1	Gm17428
Pygm	4.98e-43	-0.285175	0.528	0.577	1.66e-38	CM_1	Pygm
Doc2g	1.29e-41	-0.264515	0.34	0.411	4.31e-37	CM_1	Doc2g
Hexb	2.38e-38	-0.380195	0.13	0.176	7.96e-34	CM_1	Hexb
Rilpl1	3.97e-38	-0.259889	0.673	0.698	1.33e-33	CM_1	Rilpl1
Lrrc10	8.35e-38	-0.25187	0.34	0.399	2.79e-33	CM_1	Lrrc10
Stat3	2.89e-35	-0.256455	0.416	0.471	9.67e-31	CM_1	Stat3
Pabpn1	1.97e-34	-0.276171	0.254	0.307	6.59e-30	CM_1	Pabpn1
Ggnbp1	2.43e-33	-0.274601	0.331	0.387	8.11e-29	CM_1	Ggnbp1
Lars2.1	4.28e-13	-0.38008	0.206	0.231	1.43e-08	CM_1	Lars2
Shld1.1	1.85e-10	-0.274498	0.504	0.501	6.19e-06	CM_1	Shld1
Camk1d.1	7.76e-10	-0.731647	0.253	0.257	2.59e-05	CM_1	Camk1d
mt-Co1	0	3.40109	0.14	0	0	CM_2	mt-Co1
mt-Co3	0	2.9134	0.12	0	0	CM_2	mt-Co3
Mb	0	2.15871	0.141	0.011	0	CM_2	Mb
Ttn	0	-0.32063	0.97	0.999	0	CM_2	Ttn
Ryr2.1	0	-0.375325	0.937	0.996	0	CM_2	Ryr2
Esrrg.1	0	-0.403213	0.782	0.987	0	CM_2	Esrrg
Slc8a1.1	0	-0.468268	0.895	0.994	0	CM_2	Slc8a1
Rbm20	1.08e-303	-0.349485	0.873	0.996	3.61e-299	CM_2	Rbm20
Rcan2.1	6.9e-301	-0.407847	0.765	0.985	2.31e-296	CM_2	Rcan2
Cacna1c	4.17e-292	-0.311541	0.927	0.996	1.39e-287	CM_2	Cacna1c
Sorbs1.1	1.64e-277	-0.351828	0.839	0.994	5.49e-273	CM_2	Sorbs1
Ntn1	7.27e-274	-0.384621	0.334	0.674	2.43e-269	CM_2	Ntn1
Pip5k1b.1	3.32e-270	-0.356938	0.501	0.857	1.11e-265	CM_2	Pip5k1b
Alpk2.1	1.55e-265	-0.366024	0.374	0.727	5.17e-261	CM_2	Alpk2
Msi2	5.89e-257	-0.364197	0.745	0.987	1.97e-252	CM_2	Msi2
Dmd	1.4e-250	-0.288227	0.876	0.98	4.66e-246	CM_2	Dmd
Ehbp1.1	1.44e-242	-0.39351	0.69	0.95	4.83e-238	CM_2	Ehbp1
Pde4b.1	3.28e-240	-0.366714	0.751	0.972	1.1e-235	CM_2	Pde4b
Kcng2	5.75e-238	-0.301321	0.465	0.815	1.92e-233	CM_2	Kcng2
Fhod3	2.32e-237	-0.324334	0.831	0.993	7.75e-233	CM_2	Fhod3
Prkca	1.01e-236	-0.338151	0.477	0.818	3.39e-232	CM_2	Prkca
Akap6	1.48e-234	-0.333415	0.759	0.977	4.94e-230	CM_2	Akap6
Fgf1	5.07e-233	-0.311286	0.548	0.89	1.69e-228	CM_2	Fgf1
Pcdh7.1	5.9e-232	-0.330136	0.882	0.989	1.97e-227	CM_2	Pcdh7
Filip1	1e-231	-0.302892	0.518	0.861	3.34e-227	CM_2	Filip1
Arhgap26	2.81e-230	-0.3366	0.725	0.97	9.41e-226	CM_2	Arhgap26
Abtb2	1.04e-225	-0.255579	0.357	0.694	3.48e-221	CM_2	Abtb2
Ano4.1	2.53e-225	-0.347277	0.402	0.715	8.46e-221	CM_2	Ano4
Slc4a4	4.04e-225	-0.279422	0.428	0.765	1.35e-220	CM_2	Slc4a4
Pdzrn3	1.87e-222	-0.378784	0.404	0.714	6.27e-218	CM_2	Pdzrn3
Tmem117.1	3.41e-221	-0.267578	0.443	0.788	1.14e-216	CM_2	Tmem117
Inpp4b.1	7.47e-221	-0.325271	0.53	0.857	2.5e-216	CM_2	Inpp4b
Pgm5	1.47e-219	-0.254694	0.282	0.595	4.92e-215	CM_2	Pgm5
Prdm16	4e-219	-0.252659	0.461	0.818	1.34e-214	CM_2	Prdm16
Acyp2	6.09e-217	-0.356577	0.673	0.941	2.04e-212	CM_2	Acyp2
Setbp1.1	8.09e-217	-0.308903	0.526	0.854	2.7e-212	CM_2	Setbp1
Sgcd.1	5.79e-216	-0.32105	0.702	0.958	1.93e-211	CM_2	Sgcd
Cdh2.1	5.12e-212	-0.343699	0.753	0.97	1.71e-207	CM_2	Cdh2
Trabd2b.1	1.77e-210	-0.317478	0.522	0.842	5.92e-206	CM_2	Trabd2b
Dpf3	1.11e-209	-0.252452	0.482	0.831	3.72e-205	CM_2	Dpf3
Gse1	4.85e-209	-0.335067	0.317	0.611	1.62e-204	CM_2	Gse1
Mlip	8.4e-208	-0.330806	0.748	0.973	2.81e-203	CM_2	Mlip
Tead1.1	9.44e-208	-0.287361	0.526	0.861	3.15e-203	CM_2	Tead1
Sh3rf2	1.62e-207	-0.312984	0.177	0.432	5.43e-203	CM_2	Sh3rf2
Stau2	4.45e-207	-0.261822	0.431	0.763	1.49e-202	CM_2	Stau2
Prkce	6.1e-204	-0.274664	0.558	0.888	2.04e-199	CM_2	Prkce
Ripor2	4.77e-203	-0.348528	0.28	0.561	1.59e-198	CM_2	Ripor2
Pde4d	1.04e-202	-0.28123	0.917	0.993	3.49e-198	CM_2	Pde4d
Kcnn2	3.52e-202	-0.33293	0.679	0.946	1.18e-197	CM_2	Kcnn2
Enah	9.62e-202	-0.251867	0.426	0.75	3.21e-197	CM_2	Enah
Sox6.1	5.86e-201	-0.313557	0.719	0.965	1.96e-196	CM_2	Sox6
Hectd2os	6.15e-201	-0.435057	0.19	0.435	2.06e-196	CM_2	Hectd2os
Rgs6.2	8.88e-201	-0.501168	0.47	0.76	2.97e-196	CM_2	Rgs6
Fry	1.41e-199	-0.260704	0.607	0.915	4.72e-195	CM_2	Fry
Slco3a1	1.52e-199	-0.278762	0.377	0.691	5.09e-195	CM_2	Slco3a1
Gata4	1.58e-199	-0.251579	0.518	0.852	5.29e-195	CM_2	Gata4
D830032E09Rik	3.31e-199	-0.278009	0.425	0.74	1.11e-194	CM_2	D830032E09Rik
Myocd	2.56e-198	-0.316416	0.695	0.945	8.55e-194	CM_2	Myocd
Adk	2.92e-198	-0.299674	0.721	0.965	9.77e-194	CM_2	Adk
Itgb6.1	2.84e-197	-0.271476	0.412	0.73	9.5e-193	CM_2	Itgb6
Ralgapa2.1	1.21e-196	-0.315705	0.703	0.964	4.03e-192	CM_2	Ralgapa2
Ror1.2	2.23e-196	-0.304283	0.301	0.59	7.46e-192	CM_2	Ror1
Tnni3k	1.69e-195	-0.267134	0.771	0.982	5.66e-191	CM_2	Tnni3k
Myl3.2	2.85e-195	2.30716	0.268	0.14	9.52e-191	CM_2	Myl3
Filip1l	1.28e-193	-0.301832	0.751	0.975	4.27e-189	CM_2	Filip1l
Lrrc3b	1.34e-193	-0.297142	0.367	0.669	4.46e-189	CM_2	Lrrc3b
Mast2	2.02e-192	-0.288974	0.656	0.941	6.76e-188	CM_2	Mast2
Ppp1r3a	6.55e-192	-0.25764	0.472	0.794	2.19e-187	CM_2	Ppp1r3a
Mpped2	1.7e-189	-0.315926	0.302	0.588	5.67e-185	CM_2	Mpped2
AY036118.2	4.48e-188	1.8837	0.323	0.187	1.5e-183	CM_2	AY036118
Kbtbd12	4.78e-187	-0.271648	0.566	0.889	1.6e-182	CM_2	Kbtbd12
Ppp2r3a	8.89e-187	-0.293273	0.644	0.934	2.97e-182	CM_2	Ppp2r3a
Magi2	1.44e-186	-0.312957	0.834	0.974	4.81e-182	CM_2	Magi2
Shroom3	3.5e-186	-0.309263	0.491	0.802	1.17e-181	CM_2	Shroom3
Dlc1.2	3.66e-184	-0.350218	0.765	0.954	1.22e-179	CM_2	Dlc1
Cpeb3.1	1.03e-183	-0.326513	0.739	0.966	3.43e-179	CM_2	Cpeb3
Thrb	3.16e-183	-0.28671	0.687	0.951	1.06e-178	CM_2	Thrb
Vwa8	4.47e-183	-0.252555	0.564	0.877	1.49e-178	CM_2	Vwa8
Grm1	1.03e-182	-0.380821	0.663	0.865	3.44e-178	CM_2	Grm1
Thsd4	1.11e-182	-0.287391	0.225	0.481	3.7e-178	CM_2	Thsd4
Meis2.1	2.91e-182	-0.252361	0.531	0.852	9.73e-178	CM_2	Meis2
Ank2	2.17e-181	-0.270253	0.829	0.987	7.24e-177	CM_2	Ank2
Cabcoco1	2.28e-181	-0.308006	0.165	0.393	7.62e-177	CM_2	Cabcoco1
Ablim1	2.74e-181	-0.304334	0.77	0.976	9.15e-177	CM_2	Ablim1
Large1	6.82e-179	-0.282443	0.711	0.959	2.28e-174	CM_2	Large1
Cmya5	1.91e-177	-0.250309	0.55	0.86	6.39e-173	CM_2	Cmya5
Limch1	2.46e-177	-0.287401	0.74	0.976	8.21e-173	CM_2	Limch1
Kcnj3.1	2.72e-174	-0.317029	0.547	0.835	9.09e-170	CM_2	Kcnj3
Dip2c.1	4.34e-174	-0.285979	0.729	0.966	1.45e-169	CM_2	Dip2c
Samd4	7.68e-174	-0.272183	0.629	0.917	2.57e-169	CM_2	Samd4
Cdh13	7.94e-174	-0.302469	0.771	0.971	2.65e-169	CM_2	Cdh13
Mapk10	1.69e-173	-0.255346	0.337	0.614	5.66e-169	CM_2	Mapk10
Pbx1.1	7.75e-171	-0.280082	0.7	0.957	2.59e-166	CM_2	Pbx1
Rbfox1.1	1.3e-169	-0.377313	0.64	0.904	4.34e-165	CM_2	Rbfox1
Gramd1b	1.94e-169	-0.254084	0.54	0.848	6.48e-165	CM_2	Gramd1b
Efna5	4.41e-168	-0.290746	0.448	0.736	1.47e-163	CM_2	Efna5
Ppp1r12b	4.36e-167	-0.26044	0.725	0.969	1.46e-162	CM_2	Ppp1r12b
Nav2	1.54e-166	-0.262795	0.654	0.928	5.14e-162	CM_2	Nav2
Pde1c	5.91e-166	-0.250859	0.494	0.789	1.98e-161	CM_2	Pde1c
Psme4	3.9e-165	-0.268415	0.659	0.939	1.3e-160	CM_2	Psme4
Chchd3	1.69e-164	-0.261205	0.648	0.936	5.65e-160	CM_2	Chchd3
Zfpm2.1	3.03e-163	-0.266817	0.723	0.955	1.01e-158	CM_2	Zfpm2
Ppm1e	9.93e-163	-0.291967	0.154	0.366	3.32e-158	CM_2	Ppm1e
Lncpint.2	1.38e-161	-0.256035	0.689	0.946	4.62e-157	CM_2	Lncpint
Sorbs2	1.15e-159	-0.27628	0.814	0.984	3.86e-155	CM_2	Sorbs2
Qk.1	2.27e-158	-0.302079	0.734	0.959	7.59e-154	CM_2	Qk
Macf1.1	6.28e-156	-0.254298	0.666	0.935	2.1e-151	CM_2	Macf1
Gm12295	1.93e-151	-0.287919	0.392	0.659	6.46e-147	CM_2	Gm12295
Cacna2d1	2.33e-149	-0.259982	0.675	0.932	7.8e-145	CM_2	Cacna2d1
Gm36827	3.29e-148	-0.293915	0.202	0.418	1.1e-143	CM_2	Gm36827
Nr3c2	2.37e-146	-0.25527	0.637	0.916	7.91e-142	CM_2	Nr3c2
Corin	1.84e-141	-0.255884	0.715	0.94	6.15e-137	CM_2	Corin
Myl2.1	7.28e-140	1.18889	0.582	0.524	2.43e-135	CM_2	Myl2
Mylk4	2.15e-137	-0.265637	0.496	0.751	7.17e-133	CM_2	Mylk4
Gm13481	2.26e-136	-0.360287	0.334	0.555	7.55e-132	CM_2	Gm13481
Prkn	9.2e-133	-0.313065	0.552	0.761	3.07e-128	CM_2	Prkn
Actc1.1	3.58e-132	1.22109	0.471	0.382	1.2e-127	CM_2	Actc1
Gm35041	7.64e-125	-0.274524	0.097	0.253	2.55e-120	CM_2	Gm35041
Pdzrn4.2	4.61e-123	-0.303137	0.324	0.54	1.54e-118	CM_2	Pdzrn4
Mhrt	8.77e-120	-0.294412	0.561	0.777	2.93e-115	CM_2	Mhrt
Angpt1.1	1.28e-112	-0.280725	0.407	0.634	4.28e-108	CM_2	Angpt1
Tnnt2.1	3.57e-112	0.496752	0.945	0.979	1.19e-107	CM_2	Tnnt2
Gm35330	7.87e-108	-0.275565	0.433	0.648	2.63e-103	CM_2	Gm35330
D830005E20Rik	2.08e-105	-0.301074	0.603	0.77	6.96e-101	CM_2	D830005E20Rik
Camk1d.2	7.14e-87	1.31473	0.328	0.243	2.39e-82	CM_2	Camk1d
Tnni3.1	1.61e-85	1.34907	0.399	0.347	5.38e-81	CM_2	Tnni3
Fgf14.1	4.49e-85	-0.283971	0.46	0.65	1.5e-80	CM_2	Fgf14
Mir99ahg	9.85e-81	-0.264967	0.612	0.765	3.29e-76	CM_2	Mir99ahg
Neat1.1	7.38e-64	0.43386	0.927	0.954	2.47e-59	CM_2	Neat1
Slc25a4.1	3.92e-56	1.32974	0.349	0.312	1.31e-51	CM_2	Slc25a4
Gm42418.2	6.5e-54	1.22649	0.485	0.477	2.17e-49	CM_2	Gm42418
Got1.1	3.6e-52	0.252521	0.244	0.411	1.2e-47	CM_2	Got1
Atp5c1	2.31e-51	0.27656	0.277	0.459	7.71e-47	CM_2	Atp5c1
Sdhb.1	2.49e-51	0.252453	0.22	0.373	8.33e-47	CM_2	Sdhb
Ckm.1	1.27e-49	1.05196	0.194	0.137	4.26e-45	CM_2	Ckm
Akap8	1.11e-48	0.257684	0.182	0.316	3.72e-44	CM_2	Akap8
Ndrg4	1.29e-48	0.331456	0.24	0.397	4.3e-44	CM_2	Ndrg4
Ggnbp1.1	3.93e-47	0.33878	0.233	0.392	1.31e-42	CM_2	Ggnbp1
Slc25a42	4.38e-47	0.250954	0.243	0.404	1.46e-42	CM_2	Slc25a42
Idh3b	2.23e-46	0.311921	0.194	0.331	7.46e-42	CM_2	Idh3b
AW549877	6.05e-46	0.25137	0.159	0.279	2.02e-41	CM_2	AW549877
Fabp3.1	2.64e-45	1.04154	0.29	0.243	8.82e-41	CM_2	Fabp3
Cox7b	1.49e-44	0.281246	0.265	0.432	4.96e-40	CM_2	Cox7b
Zscan26	5.77e-44	0.280543	0.149	0.262	1.93e-39	CM_2	Zscan26
Adcy6.1	9.85e-43	0.281442	0.388	0.609	3.29e-38	CM_2	Adcy6
Atp6v0b	1.12e-42	0.269477	0.177	0.3	3.74e-38	CM_2	Atp6v0b
Srsf7	4.16e-42	0.276724	0.178	0.302	1.39e-37	CM_2	Srsf7
Gtpbp2	4.84e-42	0.340294	0.172	0.293	1.62e-37	CM_2	Gtpbp2
Tial1	8.65e-40	0.365001	0.26	0.423	2.89e-35	CM_2	Tial1
Mdh1	1.29e-39	0.308907	0.366	0.578	4.3e-35	CM_2	Mdh1
Firre	2.02e-39	0.273515	0.173	0.288	6.74e-35	CM_2	Firre
Rsrp1.1	1.48e-38	0.754762	0.676	0.795	4.96e-34	CM_2	Rsrp1
Fus	2.03e-38	0.276093	0.416	0.648	6.77e-34	CM_2	Fus
Srsf5.1	4.36e-38	1.15355	0.336	0.319	1.46e-33	CM_2	Srsf5
Tcf25.1	2.58e-37	0.320038	0.168	0.277	8.63e-33	CM_2	Tcf25
Pkm.1	3.77e-36	0.282144	0.213	0.342	1.26e-31	CM_2	Pkm
Snhg14	1.8e-35	0.279118	0.144	0.241	6.03e-31	CM_2	Snhg14
Rrad.1	1.03e-34	0.325312	0.188	0.301	3.46e-30	CM_2	Rrad
Plin4.1	2.06e-34	0.38653	0.268	0.424	6.9e-30	CM_2	Plin4
Pnn	2.95e-34	0.306256	0.157	0.26	9.86e-30	CM_2	Pnn
Cspp1	9.38e-34	0.29517	0.141	0.235	3.14e-29	CM_2	Cspp1
Mllt6	1.54e-33	0.298336	0.147	0.245	5.15e-29	CM_2	Mllt6
Mir22hg	4.07e-33	0.281454	0.173	0.279	1.36e-28	CM_2	Mir22hg
Tcap.1	8.63e-33	0.727817	0.568	0.621	2.89e-28	CM_2	Tcap
Atp5f1	2.37e-31	0.339752	0.222	0.349	7.91e-27	CM_2	Atp5f1
Myl6.1	2.15e-30	0.989458	0.113	0.075	7.19e-26	CM_2	Myl6
Phldb1.1	1.6e-29	0.31102	0.266	0.409	5.35e-25	CM_2	Phldb1
Acaa2	2.29e-29	0.317546	0.21	0.325	7.66e-25	CM_2	Acaa2
Ddx5.1	3.01e-29	0.676969	0.706	0.827	1.01e-24	CM_2	Ddx5
Ybx2	6.77e-29	0.346039	0.13	0.213	2.26e-24	CM_2	Ybx2
Tecr.1	9.51e-29	0.341988	0.299	0.459	3.18e-24	CM_2	Tecr
Agrn.1	1.24e-28	0.400095	0.192	0.302	4.13e-24	CM_2	Agrn
Map7d1.1	2.4e-28	0.317472	0.181	0.284	8.02e-24	CM_2	Map7d1
Cyhr1	6.54e-28	0.268465	0.127	0.207	2.19e-23	CM_2	Cyhr1
Tmcc3	1.43e-27	0.253686	0.146	0.231	4.78e-23	CM_2	Tmcc3
Inppl1.1	2.1e-27	0.291153	0.142	0.228	7.01e-23	CM_2	Inppl1
Doc2g.1	2.89e-27	0.338939	0.267	0.408	9.66e-23	CM_2	Doc2g
Fam193b	4.5e-27	0.370805	0.142	0.229	1.5e-22	CM_2	Fam193b
Chchd7	5.13e-27	0.260843	0.121	0.198	1.71e-22	CM_2	Chchd7
Pacsin3.1	1.08e-26	0.337532	0.174	0.273	3.6e-22	CM_2	Pacsin3
Hnrnpa3	1.59e-26	0.317005	0.22	0.341	5.33e-22	CM_2	Hnrnpa3
Pxn	2.46e-26	0.270466	0.128	0.205	8.23e-22	CM_2	Pxn
Pdhb.1	2.59e-26	0.270579	0.16	0.251	8.64e-22	CM_2	Pdhb
Slc27a1	1.76e-25	0.31426	0.479	0.705	5.87e-21	CM_2	Slc27a1
Cmss1.2	2.9e-25	0.804462	0.687	0.759	9.7e-21	CM_2	Cmss1
Flcn.1	4.15e-25	0.383645	0.136	0.217	1.39e-20	CM_2	Flcn
Bcam	1.05e-24	0.274969	0.148	0.232	3.5e-20	CM_2	Bcam
Dlg5	1.18e-24	0.282303	0.077	0.133	3.94e-20	CM_2	Dlg5
Gm26917.1	1.37e-24	0.250334	0.418	0.583	4.56e-20	CM_2	Gm26917
Nisch.1	2.02e-23	0.392782	0.34	0.513	6.75e-19	CM_2	Nisch
Chkb.1	4.27e-23	0.303329	0.137	0.214	1.43e-18	CM_2	Chkb
Gm47283	1.21e-22	0.362136	0.128	0.2	4.03e-18	CM_2	Gm47283
Samm50	1.86e-22	0.252139	0.096	0.156	6.23e-18	CM_2	Samm50
Peak1.1	2.14e-22	0.503099	0.381	0.567	7.16e-18	CM_2	Peak1
Echdc2.1	3.12e-22	0.386804	0.184	0.28	1.04e-17	CM_2	Echdc2
Trip10.1	3.26e-22	0.413727	0.2	0.302	1.09e-17	CM_2	Trip10
Ak1	3.44e-22	0.274572	0.105	0.168	1.15e-17	CM_2	Ak1
Mybpc3.1	9.71e-22	0.489746	0.739	0.855	3.25e-17	CM_2	Mybpc3
Herpud1.1	1.47e-21	0.272966	0.13	0.201	4.91e-17	CM_2	Herpud1
Per1.1	1.51e-21	0.302535	0.115	0.181	5.05e-17	CM_2	Per1
Ndufab1	2.26e-21	0.360423	0.104	0.166	7.57e-17	CM_2	Ndufab1
4930512H18Rik	3.15e-21	0.265726	0.289	0.423	1.05e-16	CM_2	4930512H18Rik
Cox7c	5.39e-21	0.496861	0.127	0.197	1.8e-16	CM_2	Cox7c
Hnrnpa2b1.1	9.45e-21	0.405095	0.29	0.428	3.16e-16	CM_2	Hnrnpa2b1
Arhgef1	1.06e-20	0.289549	0.109	0.171	3.55e-16	CM_2	Arhgef1
Ccnl2.1	3.89e-20	0.348013	0.43	0.636	1.3e-15	CM_2	Ccnl2
Hspa9.1	4.13e-20	0.385008	0.214	0.317	1.38e-15	CM_2	Hspa9
Psd3	1.78e-19	0.290074	0.323	0.458	5.95e-15	CM_2	Psd3
Ndufb3	1.82e-19	0.300434	0.132	0.201	6.08e-15	CM_2	Ndufb3
Snrnp70.1	3.38e-19	0.420866	0.441	0.646	1.13e-14	CM_2	Snrnp70
Slc25a22	6.91e-19	0.270087	0.101	0.158	2.31e-14	CM_2	Slc25a22
Tardbp	7.76e-19	0.428443	0.169	0.254	2.59e-14	CM_2	Tardbp
Cox5a	8.26e-19	0.348254	0.079	0.128	2.76e-14	CM_2	Cox5a
U2af2.1	9.65e-19	0.305366	0.111	0.171	3.22e-14	CM_2	U2af2
Coro6.1	7.13e-18	0.546751	0.685	0.832	2.38e-13	CM_2	Coro6
Hdac7	8.95e-18	0.312644	0.113	0.173	2.99e-13	CM_2	Hdac7
Atp5b.1	9.53e-18	1.02889	0.211	0.191	3.18e-13	CM_2	Atp5b
Lamc1	1.45e-17	0.264673	0.12	0.18	4.86e-13	CM_2	Lamc1
Fastk	1.98e-17	0.368776	0.142	0.212	6.63e-13	CM_2	Fastk
Rnf207.1	2.2e-17	0.290468	0.525	0.751	7.35e-13	CM_2	Rnf207
Srsf1.1	4.48e-17	0.405676	0.224	0.327	1.5e-12	CM_2	Srsf1
Epn1.1	2.07e-16	0.399129	0.137	0.202	6.91e-12	CM_2	Epn1
Cpt1b.1	3.69e-16	0.383638	0.329	0.47	1.23e-11	CM_2	Cpt1b
Gphn	3.72e-16	0.367379	0.61	0.837	1.24e-11	CM_2	Gphn
Zeb2	5.48e-16	0.384067	0.234	0.331	1.83e-11	CM_2	Zeb2
Ctnnb1	1.54e-15	0.258816	0.075	0.117	5.15e-11	CM_2	Ctnnb1
Pkd1	2.04e-15	0.283329	0.111	0.165	6.81e-11	CM_2	Pkd1
Stx4a	3.44e-15	0.272358	0.072	0.112	1.15e-10	CM_2	Stx4a
Araf	6.96e-15	0.444309	0.161	0.234	2.33e-10	CM_2	Araf
Lars2.2	1.06e-14	0.889283	0.234	0.221	3.54e-10	CM_2	Lars2
Tnnc1.1	1.18e-14	0.69475	0.532	0.612	3.95e-10	CM_2	Tnnc1
Tns2.1	4.12e-14	0.409626	0.202	0.289	1.38e-09	CM_2	Tns2
Crip2.1	4.75e-14	0.877219	0.394	0.432	1.59e-09	CM_2	Crip2
Hspg2	5.77e-14	0.380832	0.173	0.245	1.93e-09	CM_2	Hspg2
Emc7	5.81e-14	0.250013	0.072	0.11	1.94e-09	CM_2	Emc7
Mcrip2	6.3e-13	0.283969	0.098	0.143	2.11e-08	CM_2	Mcrip2
Anapc5.1	9.79e-13	0.492778	0.207	0.293	3.27e-08	CM_2	Anapc5
Dmpk.1	6.11e-12	0.713454	0.607	0.75	2.04e-07	CM_2	Dmpk
Ahnak.1	1.1e-11	0.438326	0.171	0.237	3.68e-07	CM_2	Ahnak
Bmp1	1.42e-11	0.269626	0.082	0.119	4.76e-07	CM_2	Bmp1
Hnrnpa1	1.51e-11	0.375705	0.081	0.12	5.05e-07	CM_2	Hnrnpa1
Mast4.1	3.86e-11	0.357636	0.306	0.412	1.29e-06	CM_2	Mast4
Slc2a4.1	5.19e-11	0.392284	0.191	0.266	1.74e-06	CM_2	Slc2a4
Clk1.1	1.26e-10	0.544541	0.328	0.462	4.22e-06	CM_2	Clk1
Uqcrh.1	2.17e-10	0.463329	0.088	0.126	7.25e-06	CM_2	Uqcrh
AC149090.1.1	2.44e-10	0.423227	0.192	0.264	8.14e-06	CM_2	AC149090.1
Slc4a3.1	2.5e-10	0.380258	0.435	0.618	8.35e-06	CM_2	Slc4a3
Klc1.1	2.55e-10	0.581334	0.233	0.325	8.54e-06	CM_2	Klc1
Dach1	3.23e-10	0.274388	0.096	0.133	1.08e-05	CM_2	Dach1
Atp5g2	3.78e-10	0.266021	0.073	0.105	1.26e-05	CM_2	Atp5g2
Nppb.1	5.95e-10	0.284699	0.141	0.191	1.99e-05	CM_2	Nppb
Tmem259.1	9.22e-10	0.358839	0.145	0.198	3.08e-05	CM_2	Tmem259
Csrp3.1	1.47e-09	0.419329	0.389	0.53	4.92e-05	CM_2	Csrp3
Ddx17.1	1.8e-09	0.532447	0.423	0.6	6.01e-05	CM_2	Ddx17
Snhg20.1	3.44e-09	0.379941	0.144	0.196	0.000114919	CM_2	Snhg20
Srsf6.1	6.34e-09	0.556467	0.246	0.338	0.000211952	CM_2	Srsf6
Ddx39b.1	6.92e-09	0.458553	0.175	0.238	0.000231323	CM_2	Ddx39b
Atp5d.1	1.36e-08	0.780345	0.113	0.097	0.000455594	CM_2	Atp5d
Hnrnpk.1	1.48e-08	0.401636	0.125	0.17	0.000493812	CM_2	Hnrnpk
Lamb2.1	1.5e-08	0.428722	0.176	0.237	0.000502968	CM_2	Lamb2
Usp19.1	2.54e-08	0.424587	0.116	0.158	0.000848079	CM_2	Usp19
Mtfr1l	7.03e-08	0.258579	0.079	0.109	0.0023489	CM_2	Mtfr1l
Wasf2	1.72e-07	0.357951	0.12	0.16	0.0057463	CM_2	Wasf2
Mt1.2	2.22e-07	0.370399	0.111	0.147	0.00742762	CM_2	Mt1
Mdh2.1	2.38e-07	0.454246	0.106	0.142	0.00796546	CM_2	Mdh2
Gpsm1.1	3e-07	0.559794	0.258	0.348	0.010028	CM_2	Gpsm1
Tpm1	4.05e-07	0.255277	0.761	0.864	0.0135271	CM_2	Tpm1
Atxn2l.1	9.06e-07	0.45202	0.119	0.158	0.030283	CM_2	Atxn2l
Atp5l.1	1.68e-06	0.585241	0.172	0.227	0.0561051	CM_2	Atp5l
Hrc	2.09e-06	0.729051	0.102	0.089	0.0697273	CM_2	Hrc
Cryab.2	2.93e-06	0.53391	0.094	0.124	0.0979343	CM_2	Cryab
Eno3.1	3.5e-06	0.529451	0.188	0.246	0.116814	CM_2	Eno3
Ndrg2.1	4.12e-06	0.4905	0.37	0.507	0.137739	CM_2	Ndrg2
Eif4a2.1	4.65e-06	0.523969	0.301	0.406	0.155474	CM_2	Eif4a2
Itm2b.1	5.57e-06	0.441471	0.115	0.151	0.186263	CM_2	Itm2b
Rbpj	6.48e-06	0.414789	0.176	0.227	0.216589	CM_2	Rbpj
Hsp90b1	6.99e-06	0.414412	0.099	0.13	0.23361	CM_2	Hsp90b1
Hexb.1	7.02e-06	0.596781	0.167	0.159	0.234744	CM_2	Hexb
Leng8.1	7.37e-06	0.997305	0.269	0.293	0.24638	CM_2	Leng8
Slc25a3.1	1.83e-05	0.473103	0.433	0.596	0.612717	CM_2	Slc25a3
Sh3glb2	3.71e-05	0.364693	0.092	0.119	1	CM_2	Sh3glb2
Vegfa.1	5.57e-05	0.426845	0.715	0.865	1	CM_2	Vegfa
Bsg.1	7.51e-05	0.730605	0.164	0.161	1	CM_2	Bsg
Uqcrc1.1	7.62e-05	0.535929	0.154	0.197	1	CM_2	Uqcrc1
Nxf1	0.00013424	0.35817	0.115	0.145	1	CM_2	Nxf1
Atp5a1.1	0.000401351	0.65316	0.331	0.433	1	CM_2	Atp5a1
Lgals4.1	0.000618052	0.502601	0.415	0.559	1	CM_2	Lgals4
Ptp4a3.1	0.00104044	0.54049	0.212	0.268	1	CM_2	Ptp4a3
Ubc	0.00178923	0.549027	0.135	0.167	1	CM_2	Ubc
Txnip.1	0.00206041	0.487709	0.428	0.505	1	CM_2	Txnip
Arglu1.1	0.00512356	0.738614	0.209	0.224	1	CM_2	Arglu1
Eef1a2.1	0.00566801	0.607192	0.172	0.213	1	CM_2	Eef1a2
Coro6.2	0	1.08988	0.923	0.801	0	CM_3	Coro6
Pcdh7.2	0	-0.839364	0.924	0.977	0	CM_3	Pcdh7
Qk.2	0	-0.865332	0.799	0.935	0	CM_3	Qk
Pdlim5.1	0	-0.938056	0.754	0.924	0	CM_3	Pdlim5
Tnnt2.2	9.93e-274	0.655265	0.987	0.973	3.32e-269	CM_3	Tnnt2
Neat1.2	2.21e-265	0.696169	0.969	0.948	7.39e-261	CM_3	Neat1
Vegfa.2	1.89e-257	0.810605	0.905	0.838	6.32e-253	CM_3	Vegfa
Gm26917.2	3.53e-256	1.27543	0.724	0.546	1.18e-251	CM_3	Gm26917
Ivns1abp.1	1.04e-255	0.701546	0.957	0.92	3.47e-251	CM_3	Ivns1abp
Lrrtm3	2.54e-252	-1.06394	0.359	0.702	8.49e-248	CM_3	Lrrtm3
Zfpm2.2	3.84e-237	-0.642269	0.791	0.93	1.28e-232	CM_3	Zfpm2
Trdn	4e-237	-0.576654	0.901	0.958	1.34e-232	CM_3	Trdn
Gm20732	1.4e-230	-0.777245	0.426	0.745	4.66e-226	CM_3	Gm20732
Dmd.1	1.14e-227	-0.495757	0.928	0.967	3.8e-223	CM_3	Dmd
Ttn.1	7.07e-214	0.51907	0.996	0.994	2.36e-209	CM_3	Ttn
Sorbs2os	9.91e-213	-1.08829	0.15	0.477	3.31e-208	CM_3	Sorbs2os
Zbtb20	3.02e-205	-0.449214	0.933	0.977	1.01e-200	CM_3	Zbtb20
Mybpc3.2	2.53e-201	0.800364	0.879	0.835	8.46e-197	CM_3	Mybpc3
Obscn	7.53e-201	0.592305	0.932	0.913	2.52e-196	CM_3	Obscn
Gm17428.1	1.77e-198	1.11253	0.807	0.7	5.93e-194	CM_3	Gm17428
Acacb	5.83e-198	0.67646	0.901	0.863	1.95e-193	CM_3	Acacb
Slc8a1.2	9.41e-195	-0.522923	0.964	0.98	3.14e-190	CM_3	Slc8a1
Son.1	3.47e-180	0.689229	0.91	0.892	1.16e-175	CM_3	Son
Kansl1	3.05e-179	-0.653324	0.454	0.756	1.02e-174	CM_3	Kansl1
Malat1	1.31e-163	-0.416544	0.999	0.999	4.37e-159	CM_3	Malat1
Dcp1b	1.08e-159	-0.728407	0.19	0.481	3.61e-155	CM_3	Dcp1b
Tcf12	9.38e-155	-0.65942	0.312	0.601	3.14e-150	CM_3	Tcf12
Strn3	1.78e-143	-0.558712	0.533	0.785	5.95e-139	CM_3	Strn3
Nfib	2.95e-143	-0.493853	0.717	0.89	9.86e-139	CM_3	Nfib
Rnf207.2	4.29e-138	0.68304	0.779	0.712	1.43e-133	CM_3	Rnf207
Mef2a.1	5.6e-137	-0.522345	0.572	0.811	1.87e-132	CM_3	Mef2a
Mbd5	4.12e-133	-0.531483	0.476	0.738	1.38e-128	CM_3	Mbd5
Kcnj3.2	1.98e-132	-0.648219	0.611	0.806	6.63e-128	CM_3	Kcnj3
Faf1	5.39e-131	-0.544106	0.434	0.702	1.8e-126	CM_3	Faf1
Ankrd17	8.41e-129	-0.531336	0.549	0.779	2.81e-124	CM_3	Ankrd17
Erbb4	4.26e-128	-0.515265	0.771	0.909	1.42e-123	CM_3	Erbb4
Hdac9.1	4.1e-127	-0.580889	0.443	0.709	1.37e-122	CM_3	Hdac9
Mbnl1	2.32e-126	-0.506657	0.636	0.836	7.74e-122	CM_3	Mbnl1
Dmpk.2	1.11e-125	0.59079	0.779	0.724	3.72e-121	CM_3	Dmpk
Lysmd4	1.89e-125	-0.569479	0.15	0.403	6.33e-121	CM_3	Lysmd4
Slc4a3.2	5.71e-125	0.716471	0.668	0.584	1.91e-120	CM_3	Slc4a3
Ctnna1	8.09e-125	-0.500445	0.667	0.849	2.71e-120	CM_3	Ctnna1
Ehbp1.2	7.77e-122	-0.454053	0.805	0.919	2.6e-117	CM_3	Ehbp1
Raph1	8.39e-122	-0.579399	0.487	0.728	2.8e-117	CM_3	Raph1
Gm47644	2.44e-120	-0.677978	0.278	0.539	8.14e-116	CM_3	Gm47644
Taco1	2.84e-119	0.709745	0.467	0.317	9.49e-115	CM_3	Taco1
Lgals4.2	3.84e-119	0.7562	0.641	0.53	1.28e-114	CM_3	Lgals4
Gm35188	6.69e-118	-0.564457	0.073	0.287	2.24e-113	CM_3	Gm35188
Myh6	6.44e-117	0.322444	0.982	0.984	2.15e-112	CM_3	Myh6
Fgfr2	2.34e-115	-0.563421	0.579	0.785	7.82e-111	CM_3	Fgfr2
Picalm	8e-115	-0.546176	0.266	0.522	2.67e-110	CM_3	Picalm
Slmap	9.64e-115	-0.466161	0.519	0.755	3.22e-110	CM_3	Slmap
Camk2d.1	2.97e-114	-0.406652	0.801	0.918	9.94e-110	CM_3	Camk2d
Ube2g1	1.81e-113	-0.509251	0.455	0.705	6.05e-109	CM_3	Ube2g1
Psd3.1	2.13e-111	-0.657746	0.22	0.454	7.11e-107	CM_3	Psd3
Celf2	1.95e-110	-0.388021	0.878	0.958	6.53e-106	CM_3	Celf2
Arih1	2.17e-110	-0.483209	0.405	0.665	7.25e-106	CM_3	Arih1
Sox6.2	3.68e-110	-0.370435	0.851	0.933	1.23e-105	CM_3	Sox6
Rab10	8.24e-110	-0.454729	0.317	0.578	2.75e-105	CM_3	Rab10
Tcf4	8.96e-110	-0.743093	0.085	0.285	3e-105	CM_3	Tcf4
Tns1	2.36e-108	0.562856	0.852	0.84	7.89e-104	CM_3	Tns1
Strbp	4.05e-107	-0.473985	0.353	0.612	1.35e-102	CM_3	Strbp
Trim55	1.15e-106	-0.456024	0.571	0.786	3.84e-102	CM_3	Trim55
Pde4b.2	2.97e-105	-0.416656	0.875	0.944	9.93e-101	CM_3	Pde4b
Tsc22d2	7.59e-104	-0.477782	0.102	0.312	2.54e-99	CM_3	Tsc22d2
Diaph2	1.34e-103	-0.50187	0.492	0.72	4.48e-99	CM_3	Diaph2
Phldb1.2	4.17e-102	0.700022	0.51	0.378	1.39e-97	CM_3	Phldb1
Cog5	5.59e-102	-0.44813	0.435	0.688	1.87e-97	CM_3	Cog5
6720427I07Rik	1.13e-101	-0.46039	0.142	0.372	3.77e-97	CM_3	6720427I07Rik
Atp2a2	2.1e-101	-0.318104	0.954	0.975	7.01e-97	CM_3	Atp2a2
Ube2k	2.87e-101	-0.428076	0.276	0.527	9.59e-97	CM_3	Ube2k
Pln	3.06e-100	-0.336708	0.917	0.969	1.02e-95	CM_3	Pln
Tbc1d5	7.75e-100	-0.444559	0.545	0.768	2.59e-95	CM_3	Tbc1d5
Lama2.1	1.27e-99	-0.45499	0.769	0.906	4.23e-95	CM_3	Lama2
Zcchc7	2.64e-99	-0.453658	0.514	0.747	8.82e-95	CM_3	Zcchc7
Nfyc	9.57e-99	-0.418069	0.628	0.821	3.2e-94	CM_3	Nfyc
Ldb3	1.3e-98	0.374532	0.973	0.964	4.33e-94	CM_3	Ldb3
Tacc2	1.5e-98	0.425314	0.927	0.917	5.03e-94	CM_3	Tacc2
Homer1	4.86e-98	-0.444171	0.262	0.503	1.62e-93	CM_3	Homer1
Nptn	9.79e-97	-0.471011	0.301	0.545	3.27e-92	CM_3	Nptn
Mast4.2	1.11e-96	-0.635746	0.201	0.411	3.7e-92	CM_3	Mast4
Enah.1	8.12e-96	-0.492117	0.489	0.717	2.71e-91	CM_3	Enah
Cacna2d1.1	7.43e-95	-0.409585	0.779	0.902	2.48e-90	CM_3	Cacna2d1
4930512H18Rik.1	1.07e-94	-0.55878	0.193	0.419	3.58e-90	CM_3	4930512H18Rik
5330438D12Rik	1.67e-94	-0.483002	0.065	0.248	5.57e-90	CM_3	5330438D12Rik
Camk1d.3	1.97e-94	1.18762	0.39	0.246	6.58e-90	CM_3	Camk1d
Cacna1c.1	2.3e-94	0.272219	0.991	0.985	7.69e-90	CM_3	Cacna1c
Msrb3	2.59e-94	-0.405335	0.58	0.793	8.65e-90	CM_3	Msrb3
Gm29237	3.61e-94	-0.452308	0.073	0.261	1.21e-89	CM_3	Gm29237
Mib1	1.23e-92	-0.42806	0.212	0.441	4.12e-88	CM_3	Mib1
Celf1	3.46e-92	-0.439993	0.299	0.543	1.16e-87	CM_3	Celf1
Nr6a1	4.34e-92	-0.421212	0.23	0.463	1.45e-87	CM_3	Nr6a1
Ube2d3	8.74e-92	-0.443273	0.305	0.545	2.92e-87	CM_3	Ube2d3
Gm10135	2.26e-91	-0.385765	0.041	0.208	7.57e-87	CM_3	Gm10135
Macrod1	2.72e-91	0.667494	0.744	0.704	9.09e-87	CM_3	Macrod1
Dst	3.27e-91	0.430153	0.914	0.929	1.09e-86	CM_3	Dst
Zfr	1.76e-90	-0.412442	0.436	0.675	5.88e-86	CM_3	Zfr
Lcor	7.61e-90	-0.408492	0.396	0.639	2.54e-85	CM_3	Lcor
Ctnna3	3.51e-89	-0.269976	0.963	0.979	1.17e-84	CM_3	Ctnna3
Dip2c.2	3.69e-89	-0.340287	0.855	0.936	1.23e-84	CM_3	Dip2c
Atf6	6.13e-89	-0.464393	0.391	0.627	2.05e-84	CM_3	Atf6
Adk.1	9.26e-89	-0.329588	0.861	0.934	3.09e-84	CM_3	Adk
Akap13	1.35e-88	-0.399633	0.596	0.802	4.52e-84	CM_3	Akap13
Gm48606	5.29e-88	-0.445236	0.077	0.256	1.77e-83	CM_3	Gm48606
Fgf13.1	8.53e-87	-0.348414	0.914	0.956	2.85e-82	CM_3	Fgf13
Gm37240	1.22e-86	-0.442483	0.402	0.636	4.09e-82	CM_3	Gm37240
Rabgap1l	2.06e-86	-0.523261	0.574	0.768	6.88e-82	CM_3	Rabgap1l
Cdc73	2.74e-86	-0.401316	0.239	0.463	9.17e-82	CM_3	Cdc73
Phtf2	3.55e-86	-0.402859	0.499	0.727	1.19e-81	CM_3	Phtf2
Mtmr3	1.54e-85	-0.391951	0.445	0.679	5.13e-81	CM_3	Mtmr3
Mllt10	2.06e-85	-0.376293	0.594	0.799	6.9e-81	CM_3	Mllt10
Ppargc1a	5.98e-85	-0.43663	0.701	0.854	2e-80	CM_3	Ppargc1a
Top1	2e-84	-0.384652	0.276	0.505	6.69e-80	CM_3	Top1
Gm15336	2.83e-83	-0.443595	0.06	0.225	9.47e-79	CM_3	Gm15336
Gm15283	1.47e-82	-0.480454	0.116	0.306	4.91e-78	CM_3	Gm15283
Ammecr1	1.75e-82	-0.414242	0.176	0.381	5.84e-78	CM_3	Ammecr1
Magi2.1	3.28e-82	-0.342557	0.916	0.956	1.1e-77	CM_3	Magi2
Gm47271	6.73e-82	-0.430876	0.045	0.199	2.25e-77	CM_3	Gm47271
Lrrc4	9.13e-82	-0.370641	0.079	0.253	3.05e-77	CM_3	Lrrc4
Gm20647	1.8e-81	-0.455727	0.123	0.314	6.01e-77	CM_3	Gm20647
Dlg1	1.6e-80	-0.405383	0.493	0.709	5.33e-76	CM_3	Dlg1
Kcnq1ot1	1.85e-80	-0.448067	0.216	0.428	6.19e-76	CM_3	Kcnq1ot1
Carns1.1	5.63e-79	0.656965	0.496	0.39	1.88e-74	CM_3	Carns1
Zfand3	2e-78	-0.376182	0.432	0.665	6.7e-74	CM_3	Zfand3
Stag1	1.66e-77	-0.450318	0.237	0.443	5.55e-73	CM_3	Stag1
Akap6.1	3.2e-77	-0.282995	0.889	0.949	1.07e-72	CM_3	Akap6
Rtn3	3.21e-77	-0.358164	0.43	0.665	1.07e-72	CM_3	Rtn3
Zeb2.1	3.49e-77	-0.538973	0.15	0.329	1.17e-72	CM_3	Zeb2
Lrba	3.53e-77	-0.373126	0.417	0.645	1.18e-72	CM_3	Lrba
Rasal2	9.63e-77	-0.418807	0.386	0.611	3.22e-72	CM_3	Rasal2
8030462N17Rik	2.16e-76	-0.345659	0.218	0.428	7.21e-72	CM_3	8030462N17Rik
Kansl1l	4.87e-76	-0.389683	0.515	0.726	1.63e-71	CM_3	Kansl1l
Wac	1.14e-75	-0.358401	0.309	0.532	3.82e-71	CM_3	Wac
Pam	1.56e-75	-0.401239	0.586	0.77	5.23e-71	CM_3	Pam
Nlk	1.7e-75	-0.410571	0.209	0.408	5.68e-71	CM_3	Nlk
Cdh2.2	1.95e-75	-0.339319	0.89	0.941	6.52e-71	CM_3	Cdh2
Ssh2	3.45e-75	-0.384522	0.528	0.736	1.15e-70	CM_3	Ssh2
Nfat5	9.15e-75	-0.412754	0.467	0.679	3.06e-70	CM_3	Nfat5
Lnpep	1.35e-74	-0.347648	0.531	0.748	4.5e-70	CM_3	Lnpep
Cul3	2.95e-74	-0.356095	0.221	0.425	9.87e-70	CM_3	Cul3
Ubn2	2.99e-74	-0.362425	0.559	0.765	9.99e-70	CM_3	Ubn2
Cnot2	5.66e-74	-0.342041	0.269	0.49	1.89e-69	CM_3	Cnot2
1810013L24Rik	2.71e-73	-0.370126	0.279	0.494	9.07e-69	CM_3	1810013L24Rik
Gm48678	3.05e-73	-0.40666	0.051	0.197	1.02e-68	CM_3	Gm48678
Pard3b	3.79e-73	-0.377972	0.57	0.764	1.27e-68	CM_3	Pard3b
Pafah1b1	5.41e-73	-0.353141	0.524	0.729	1.81e-68	CM_3	Pafah1b1
Mef2c	5.71e-73	-0.431839	0.408	0.614	1.91e-68	CM_3	Mef2c
Ext1	1.79e-72	-0.478472	0.445	0.646	5.99e-68	CM_3	Ext1
Gm13601	6.13e-72	-0.362578	0.03	0.162	2.05e-67	CM_3	Gm13601
Luc7l2	1.33e-71	-0.291878	0.877	0.945	4.45e-67	CM_3	Luc7l2
Gsk3b	1.54e-71	-0.330777	0.28	0.497	5.16e-67	CM_3	Gsk3b
Rps6ka3	5.81e-71	-0.369821	0.203	0.398	1.94e-66	CM_3	Rps6ka3
Aldh9a1	7e-71	0.647975	0.481	0.388	2.34e-66	CM_3	Aldh9a1
Stag2	1.8e-70	-0.35365	0.226	0.428	6.02e-66	CM_3	Stag2
Vcl	2.11e-70	-0.365835	0.391	0.612	7.05e-66	CM_3	Vcl
Spata5	2.16e-70	-0.310463	0.191	0.39	7.23e-66	CM_3	Spata5
Ythdf3	8.28e-70	-0.353101	0.37	0.588	2.77e-65	CM_3	Ythdf3
Pard3bos1	1.34e-69	-0.363694	0.028	0.155	4.47e-65	CM_3	Pard3bos1
Mhrt.1	1.42e-69	0.658253	0.731	0.746	4.73e-65	CM_3	Mhrt
Ube3a	2.39e-69	-0.360372	0.338	0.551	7.98e-65	CM_3	Ube3a
Polr3h	4.32e-69	-0.353825	0.206	0.406	1.44e-64	CM_3	Polr3h
Exoc4	5.45e-69	-0.366907	0.542	0.744	1.82e-64	CM_3	Exoc4
Pbx3	5.46e-69	-0.4555	0.101	0.259	1.83e-64	CM_3	Pbx3
Cpeb4	5.81e-69	-0.369645	0.399	0.611	1.94e-64	CM_3	Cpeb4
C130080G10Rik	6.94e-69	-0.417603	0.176	0.367	2.32e-64	CM_3	C130080G10Rik
Immp2l	1.05e-68	-0.378923	0.733	0.854	3.52e-64	CM_3	Immp2l
Fgf14.2	1.54e-68	-0.680775	0.476	0.632	5.14e-64	CM_3	Fgf14
Prdm16.1	1.92e-68	0.535152	0.767	0.764	6.43e-64	CM_3	Prdm16
Mlip.1	2e-68	-0.266857	0.869	0.945	6.68e-64	CM_3	Mlip
Apoo	2.34e-68	-0.305341	0.203	0.401	7.83e-64	CM_3	Apoo
Srrm2.1	3.25e-68	0.506147	0.695	0.698	1.09e-63	CM_3	Srrm2
Etfa	4.07e-68	-0.340808	0.504	0.711	1.36e-63	CM_3	Etfa
Ugp2	1.01e-67	-0.441747	0.258	0.448	3.36e-63	CM_3	Ugp2
Antxr2	1.99e-67	-0.360019	0.425	0.638	6.64e-63	CM_3	Antxr2
Ogdh	2.01e-67	-0.326538	0.745	0.876	6.73e-63	CM_3	Ogdh
Bmpr2	2.99e-67	-0.329083	0.146	0.321	1e-62	CM_3	Bmpr2
Memo1	5.82e-67	-0.329031	0.229	0.426	1.94e-62	CM_3	Memo1
Ndufs4	8.91e-67	-0.33788	0.427	0.645	2.98e-62	CM_3	Ndufs4
3110021N24Rik	9.33e-67	-0.303043	0.063	0.206	3.12e-62	CM_3	3110021N24Rik
Mecp2	1.86e-66	-0.313295	0.305	0.52	6.2e-62	CM_3	Mecp2
Ndrg2.2	1.88e-66	0.555829	0.561	0.481	6.27e-62	CM_3	Ndrg2
Mkln1	1.16e-65	-0.314435	0.354	0.571	3.88e-61	CM_3	Mkln1
Mir99ahg.1	2e-65	-0.396135	0.624	0.751	6.7e-61	CM_3	Mir99ahg
Rbm6	2.22e-65	-0.315559	0.413	0.635	7.41e-61	CM_3	Rbm6
Rap1a	2.98e-65	-0.349978	0.086	0.234	9.97e-61	CM_3	Rap1a
Ssbp2	3.12e-65	-0.362697	0.346	0.55	1.04e-60	CM_3	Ssbp2
Pspc1	4.37e-65	-0.298805	0.107	0.266	1.46e-60	CM_3	Pspc1
Foxj3	6.36e-65	-0.279123	0.14	0.313	2.13e-60	CM_3	Foxj3
Ggact	8.25e-65	-0.322675	0.114	0.276	2.76e-60	CM_3	Ggact
Pten	1.9e-64	-0.315977	0.211	0.401	6.33e-60	CM_3	Pten
Ctnnd1	4.5e-64	-0.333074	0.195	0.387	1.5e-59	CM_3	Ctnnd1
Scmh1	1.29e-63	-0.316343	0.39	0.607	4.3e-59	CM_3	Scmh1
Hipk3	1.44e-63	-0.303796	0.389	0.6	4.81e-59	CM_3	Hipk3
Rab2a	1.61e-63	-0.308318	0.196	0.382	5.39e-59	CM_3	Rab2a
Vldlr	2.35e-63	0.544427	0.642	0.61	7.85e-59	CM_3	Vldlr
Lims1	3.9e-63	-0.320522	0.439	0.652	1.3e-58	CM_3	Lims1
Spop	5.48e-63	-0.319855	0.353	0.561	1.83e-58	CM_3	Spop
Tnnc1.2	7.16e-63	-0.34411	0.4	0.615	2.39e-58	CM_3	Tnnc1
D830005E20Rik.1	1.05e-62	-0.420026	0.661	0.751	3.5e-58	CM_3	D830005E20Rik
Nav2.1	1.78e-62	0.44444	0.879	0.888	5.96e-58	CM_3	Nav2
Grb10	1.97e-62	-0.39076	0.257	0.439	6.59e-58	CM_3	Grb10
Ap2b1	2.08e-62	-0.298784	0.184	0.366	6.96e-58	CM_3	Ap2b1
Atp5f1.1	3.24e-62	-0.353699	0.172	0.342	1.08e-57	CM_3	Atp5f1
Gm26632	3.67e-62	-0.32846	0.132	0.302	1.23e-57	CM_3	Gm26632
Jarid2	4.71e-62	-0.346061	0.5	0.706	1.57e-57	CM_3	Jarid2
Caprin1	5.16e-62	-0.338155	0.274	0.471	1.73e-57	CM_3	Caprin1
Gm36975	5.51e-62	-0.35026	0.052	0.183	1.84e-57	CM_3	Gm36975
Susd6	7.19e-62	-0.313892	0.409	0.614	2.4e-57	CM_3	Susd6
Mat2a	9.15e-62	-0.33784	0.315	0.515	3.06e-57	CM_3	Mat2a
Gm28376	1.45e-61	-0.372461	0.084	0.23	4.83e-57	CM_3	Gm28376
Smpx	1.72e-61	-0.340541	0.37	0.57	5.76e-57	CM_3	Smpx
Wdr33	2.26e-61	-0.296773	0.387	0.598	7.54e-57	CM_3	Wdr33
Gm42418.3	3.61e-61	1.26325	0.52	0.475	1.21e-56	CM_3	Gm42418
Gm49708.1	3.79e-61	-0.43982	0.453	0.641	1.27e-56	CM_3	Gm49708
Kpna4	4.71e-61	-0.291369	0.233	0.425	1.58e-56	CM_3	Kpna4
Cisd2	4.87e-61	-0.302904	0.261	0.461	1.63e-56	CM_3	Cisd2
Casz1	1.78e-60	0.460198	0.816	0.828	5.96e-56	CM_3	Casz1
Agrn.2	2.11e-60	0.568123	0.382	0.279	7.04e-56	CM_3	Agrn
Cdk13	3.06e-60	-0.321346	0.339	0.548	1.02e-55	CM_3	Cdk13
Gm20631	4.43e-60	-0.304991	0.06	0.193	1.48e-55	CM_3	Gm20631
Etl4	7.32e-60	-0.337834	0.343	0.542	2.45e-55	CM_3	Etl4
Mnat1	9.22e-60	-0.273796	0.263	0.46	3.08e-55	CM_3	Mnat1
Actc1.2	1.09e-59	-0.651935	0.249	0.406	3.65e-55	CM_3	Actc1
Smtn.1	1.17e-59	0.416948	0.813	0.812	3.91e-55	CM_3	Smtn
Fign.1	1.34e-59	-0.358408	0.565	0.741	4.48e-55	CM_3	Fign
Pxn.1	1.76e-59	0.540085	0.291	0.186	5.89e-55	CM_3	Pxn
Sorbs2.1	2.07e-59	-0.2809	0.927	0.961	6.93e-55	CM_3	Sorbs2
Tfdp2.1	3.41e-59	-0.346477	0.487	0.675	1.14e-54	CM_3	Tfdp2
P2ry14	4.37e-59	-0.30815	0.056	0.184	1.46e-54	CM_3	P2ry14
2007-09-01	4.84e-59	-0.272919	0.15	0.316	1.62e-54	CM_3	45907
Setd5	5.05e-59	-0.273139	0.346	0.556	1.69e-54	CM_3	Setd5
Ghr.1	5.35e-59	-0.280781	0.859	0.935	1.79e-54	CM_3	Ghr
Fchsd2	8.35e-59	-0.258655	0.268	0.465	2.79e-54	CM_3	Fchsd2
Sgcd.2	8.73e-59	-0.258982	0.846	0.925	2.92e-54	CM_3	Sgcd
Ambra1	1.15e-58	-0.277253	0.362	0.575	3.84e-54	CM_3	Ambra1
Igf2r	1.92e-58	-0.360762	0.25	0.434	6.4e-54	CM_3	Igf2r
Prkg1	2.74e-58	-0.397467	0.623	0.776	9.17e-54	CM_3	Prkg1
Adcy6.2	3.85e-58	0.494126	0.62	0.572	1.29e-53	CM_3	Adcy6
Smurf2	6.6e-58	-0.295829	0.188	0.364	2.2e-53	CM_3	Smurf2
Arhgap6	1.08e-57	-0.41832	0.405	0.583	3.62e-53	CM_3	Arhgap6
Ptk2	1.42e-57	-0.30133	0.191	0.365	4.75e-53	CM_3	Ptk2
Ppp2r5e	2.87e-57	-0.297514	0.293	0.496	9.6e-53	CM_3	Ppp2r5e
Hnrnpc	3.78e-57	-0.274469	0.321	0.522	1.26e-52	CM_3	Hnrnpc
Gm16552	7.5e-57	-0.254258	0.028	0.138	2.51e-52	CM_3	Gm16552
Tbx20	1.25e-56	-0.363882	0.338	0.526	4.18e-52	CM_3	Tbx20
Desi2	3.32e-56	-0.274228	0.313	0.516	1.11e-51	CM_3	Desi2
Mob1b	3.62e-56	-0.272093	0.118	0.268	1.21e-51	CM_3	Mob1b
Herc4	5.32e-56	-0.291701	0.263	0.45	1.78e-51	CM_3	Herc4
Ptprk	6.43e-56	-0.307568	0.414	0.611	2.15e-51	CM_3	Ptprk
Man1a	1.09e-55	-0.346101	0.264	0.445	3.66e-51	CM_3	Man1a
Atf7	2.21e-55	-0.276249	0.186	0.366	7.39e-51	CM_3	Atf7
Oxr1	3.1e-55	-0.353282	0.128	0.274	1.04e-50	CM_3	Oxr1
Tecrl	1.14e-54	-0.306365	0.61	0.779	3.81e-50	CM_3	Tecrl
Mpc2	1.22e-54	-0.270142	0.175	0.339	4.06e-50	CM_3	Mpc2
Grb14.1	1.42e-54	-0.322286	0.641	0.799	4.74e-50	CM_3	Grb14
Ube2d2a	1.97e-54	-0.254419	0.179	0.348	6.58e-50	CM_3	Ube2d2a
1600010M07Rik	2.08e-54	-0.295661	0.064	0.19	6.94e-50	CM_3	1600010M07Rik
Gm5089	2.77e-54	-0.288638	0.045	0.16	9.26e-50	CM_3	Gm5089
Cstf3	5.03e-54	-0.279438	0.146	0.303	1.68e-49	CM_3	Cstf3
Atf2	6.66e-54	-0.264097	0.191	0.361	2.23e-49	CM_3	Atf2
Rnf13	7.09e-54	-0.281126	0.275	0.459	2.37e-49	CM_3	Rnf13
Arhgef9	7.35e-54	-0.263789	0.138	0.291	2.46e-49	CM_3	Arhgef9
Meis2.2	8.19e-54	-0.278678	0.65	0.815	2.74e-49	CM_3	Meis2
Dnajc1	1.01e-53	-0.299949	0.371	0.567	3.38e-49	CM_3	Dnajc1
Pde3a.1	1.3e-53	-0.313426	0.678	0.825	4.33e-49	CM_3	Pde3a
Actr3	1.4e-53	-0.283651	0.188	0.354	4.7e-49	CM_3	Actr3
Ppp1r12a	1.56e-53	-0.275367	0.522	0.714	5.23e-49	CM_3	Ppp1r12a
Plscr5	2.51e-53	-0.262788	0.045	0.16	8.4e-49	CM_3	Plscr5
Gm31251	3.07e-53	0.550122	0.73	0.756	1.03e-48	CM_3	Gm31251
Gm15738	3.58e-53	-0.263526	0.052	0.171	1.2e-48	CM_3	Gm15738
Rock2	3.64e-53	-0.318186	0.56	0.735	1.22e-48	CM_3	Rock2
Prkaa2	3.95e-53	-0.287155	0.459	0.654	1.32e-48	CM_3	Prkaa2
Fcho2	6.63e-53	-0.286497	0.236	0.413	2.22e-48	CM_3	Fcho2
Zfp148	7.21e-53	-0.279514	0.323	0.517	2.41e-48	CM_3	Zfp148
Gm16599	9.14e-53	-0.269654	0.081	0.213	3.05e-48	CM_3	Gm16599
Fus.1	1e-52	-0.292842	0.418	0.628	3.36e-48	CM_3	Fus
Taf15	1.16e-52	-0.276108	0.205	0.375	3.87e-48	CM_3	Taf15
Mtdh	1.27e-52	-0.271077	0.212	0.383	4.24e-48	CM_3	Mtdh
Fxr1	1.82e-52	-0.276634	0.471	0.674	6.07e-48	CM_3	Fxr1
AY036118.3	1.92e-52	0.997562	0.3	0.2	6.42e-48	CM_3	AY036118
Mtx2	2.19e-52	-0.267658	0.19	0.356	7.33e-48	CM_3	Mtx2
Oip5os1	2.43e-52	-0.300256	0.219	0.401	8.12e-48	CM_3	Oip5os1
Zmym4	2.78e-52	-0.274738	0.309	0.5	9.29e-48	CM_3	Zmym4
Nr4a1.2	2.95e-52	-0.308218	0.059	0.177	9.86e-48	CM_3	Nr4a1
Nufip2	3.3e-52	-0.278757	0.248	0.428	1.1e-47	CM_3	Nufip2
Fut8	3.62e-52	-0.284639	0.162	0.318	1.21e-47	CM_3	Fut8
Ppm1b	4.18e-52	-0.252765	0.27	0.454	1.4e-47	CM_3	Ppm1b
Sycp3	4.61e-52	-0.275023	0.052	0.167	1.54e-47	CM_3	Sycp3
Sh3bgr	4.76e-52	-0.277335	0.131	0.278	1.59e-47	CM_3	Sh3bgr
Zfp280d	7.83e-52	-0.306628	0.377	0.568	2.62e-47	CM_3	Zfp280d
Abcb7	8e-52	-0.280874	0.189	0.351	2.67e-47	CM_3	Abcb7
Mapk8	8.67e-52	-0.252162	0.163	0.322	2.9e-47	CM_3	Mapk8
Erc1	1.14e-51	-0.270932	0.594	0.785	3.82e-47	CM_3	Erc1
Fsd1l	1.19e-51	-0.292209	0.396	0.594	3.96e-47	CM_3	Fsd1l
Tbl1x	1.66e-51	-0.2835	0.381	0.579	5.55e-47	CM_3	Tbl1x
Gm48321	1.71e-51	-0.276243	0.07	0.194	5.72e-47	CM_3	Gm48321
4930567K20Rik	2.4e-51	-0.323967	0.065	0.186	8.01e-47	CM_3	4930567K20Rik
Fmo5	2.87e-51	-0.26315	0.062	0.18	9.6e-47	CM_3	Fmo5
Dleu2	3.05e-51	-0.312985	0.31	0.503	1.02e-46	CM_3	Dleu2
Luzp1	4.27e-51	-0.292374	0.153	0.304	1.43e-46	CM_3	Luzp1
Epc1	5.43e-51	-0.258459	0.393	0.591	1.81e-46	CM_3	Epc1
St7	7.7e-51	-0.272757	0.366	0.561	2.57e-46	CM_3	St7
Bmpr1a	8.48e-51	-0.26414	0.643	0.807	2.83e-46	CM_3	Bmpr1a
Lamc1.1	8.68e-51	-0.372009	0.066	0.179	2.9e-46	CM_3	Lamc1
Rbfox2.1	8.92e-51	-0.268297	0.555	0.741	2.98e-46	CM_3	Rbfox2
Dach1.1	1.33e-50	-0.47885	0.034	0.135	4.45e-46	CM_3	Dach1
Gm47712	2.86e-50	-0.407519	0.107	0.239	9.57e-46	CM_3	Gm47712
Vapa	3.08e-50	-0.258712	0.197	0.362	1.03e-45	CM_3	Vapa
Lpp.1	3.12e-50	-0.281064	0.626	0.795	1.04e-45	CM_3	Lpp
Cpeb2	3.34e-50	-0.271616	0.254	0.429	1.12e-45	CM_3	Cpeb2
Phf14	3.66e-50	-0.286948	0.347	0.539	1.22e-45	CM_3	Phf14
N4bp2l2	5.94e-50	-0.277696	0.382	0.575	1.99e-45	CM_3	N4bp2l2
Neo1	9.26e-50	-0.265359	0.572	0.755	3.1e-45	CM_3	Neo1
Psmd14	9.47e-50	-0.260156	0.111	0.247	3.17e-45	CM_3	Psmd14
Gm31356	9.81e-50	-0.293018	0.065	0.184	3.28e-45	CM_3	Gm31356
Osbpl8	1.79e-49	-0.265915	0.514	0.704	5.99e-45	CM_3	Osbpl8
Fam49b	2.04e-49	-0.254481	0.235	0.406	6.81e-45	CM_3	Fam49b
Ptprd	2.41e-49	-0.335224	0.474	0.654	8.04e-45	CM_3	Ptprd
Tmem65.1	2.44e-49	-0.275698	0.509	0.699	8.15e-45	CM_3	Tmem65
Phf21a	2.85e-49	-0.281228	0.377	0.564	9.54e-45	CM_3	Phf21a
Gm15614	5.67e-49	-0.253121	0.083	0.21	1.89e-44	CM_3	Gm15614
Sh3kbp1	6.1e-49	-0.275315	0.187	0.344	2.04e-44	CM_3	Sh3kbp1
Alpk3	6.11e-49	0.42533	0.736	0.729	2.04e-44	CM_3	Alpk3
1700012D14Rik	8.27e-49	-0.252927	0.258	0.443	2.76e-44	CM_3	1700012D14Rik
Numb	1.13e-48	-0.264517	0.179	0.335	3.79e-44	CM_3	Numb
Ankrd28	1.3e-48	-0.26292	0.298	0.482	4.35e-44	CM_3	Ankrd28
Mid1	9.48e-48	-0.324129	0.423	0.593	3.17e-43	CM_3	Mid1
Trip10.2	2.84e-47	0.498203	0.369	0.281	9.48e-43	CM_3	Trip10
Pan3	2.88e-47	-0.257598	0.379	0.574	9.63e-43	CM_3	Pan3
Rfx7	5.26e-47	-0.278845	0.218	0.381	1.76e-42	CM_3	Rfx7
Sfpq	5.75e-47	-0.256804	0.344	0.527	1.92e-42	CM_3	Sfpq
Baz2b	1.48e-46	-0.273827	0.543	0.723	4.94e-42	CM_3	Baz2b
Psme4.1	3.62e-46	-0.253016	0.813	0.904	1.21e-41	CM_3	Psme4
Grk5	3.72e-46	-0.401784	0.208	0.356	1.24e-41	CM_3	Grk5
Creb1	4.44e-46	-0.27653	0.147	0.286	1.48e-41	CM_3	Creb1
Hexb.2	6.85e-46	0.598998	0.245	0.154	2.29e-41	CM_3	Hexb
Dot1l	1.34e-45	0.516507	0.585	0.565	4.49e-41	CM_3	Dot1l
Arhgap5	2.03e-45	-0.253254	0.378	0.567	6.77e-41	CM_3	Arhgap5
Znrf3	6.33e-45	-0.253368	0.305	0.484	2.11e-40	CM_3	Znrf3
Myh7b	8.91e-45	0.514451	0.744	0.727	2.98e-40	CM_3	Myh7b
Fnip1	1.12e-44	-0.267903	0.543	0.721	3.75e-40	CM_3	Fnip1
Bicd1	1.18e-44	-0.25012	0.18	0.327	3.95e-40	CM_3	Bicd1
Tcf20	1.4e-44	-0.256366	0.186	0.333	4.66e-40	CM_3	Tcf20
Xiap	2.21e-44	-0.254546	0.135	0.268	7.39e-40	CM_3	Xiap
Plcb4	2.22e-44	-0.255231	0.242	0.406	7.43e-40	CM_3	Plcb4
Dock4	2.69e-44	-0.263547	0.317	0.489	8.98e-40	CM_3	Dock4
Rapgef6	4.46e-44	-0.261564	0.422	0.607	1.49e-39	CM_3	Rapgef6
Mir100hg	5.35e-44	-0.287036	0.18	0.329	1.79e-39	CM_3	Mir100hg
Cep85l	6.26e-44	-0.253933	0.184	0.332	2.09e-39	CM_3	Cep85l
Wnk1	6.92e-44	-0.280681	0.659	0.808	2.31e-39	CM_3	Wnk1
Cobll1	7.39e-44	-0.271674	0.582	0.752	2.47e-39	CM_3	Cobll1
Adamts6	9.45e-44	-0.264484	0.298	0.467	3.16e-39	CM_3	Adamts6
Fbxo11	1.39e-43	-0.250497	0.271	0.436	4.66e-39	CM_3	Fbxo11
Gm48765	1.55e-43	-0.252244	0.036	0.129	5.17e-39	CM_3	Gm48765
Gm32369	1.77e-43	-0.250829	0.043	0.139	5.91e-39	CM_3	Gm32369
Slc6a6	2.53e-43	-0.338819	0.175	0.312	8.46e-39	CM_3	Slc6a6
Tsc22d3	2.81e-43	-0.297722	0.205	0.353	9.4e-39	CM_3	Tsc22d3
Cask	2.43e-42	-0.256762	0.076	0.184	8.12e-38	CM_3	Cask
Hivep2	2.81e-42	-0.252461	0.489	0.671	9.38e-38	CM_3	Hivep2
Mlxipl	3.92e-42	0.538087	0.488	0.424	1.31e-37	CM_3	Mlxipl
Plcl1	7.22e-42	-0.49429	0.03	0.114	2.41e-37	CM_3	Plcl1
Fbxw7	8.5e-42	-0.259517	0.473	0.653	2.84e-37	CM_3	Fbxw7
Ccnl2.2	8.69e-42	0.443662	0.611	0.605	2.9e-37	CM_3	Ccnl2
Tnni3.2	9.35e-42	0.686107	0.426	0.349	3.13e-37	CM_3	Tnni3
Ppp1r14c.1	1.35e-41	-0.259208	0.665	0.813	4.51e-37	CM_3	Ppp1r14c
Klf7	1.49e-41	-0.270275	0.091	0.202	4.98e-37	CM_3	Klf7
Trak1	4.78e-41	0.375601	0.792	0.818	1.6e-36	CM_3	Trak1
Fhl1	1.01e-39	-0.263066	0.113	0.231	3.37e-35	CM_3	Fhl1
Il31ra	3.62e-39	0.489621	0.196	0.118	1.21e-34	CM_3	Il31ra
Trim7	6.99e-39	0.508281	0.613	0.588	2.34e-34	CM_3	Trim7
Pacsin3.2	7.61e-39	0.46258	0.332	0.252	2.54e-34	CM_3	Pacsin3
Arhgap29	1.33e-38	0.443321	0.632	0.63	4.44e-34	CM_3	Arhgap29
Gnb1	1.57e-38	-0.256479	0.027	0.105	5.24e-34	CM_3	Gnb1
Lama4	7.16e-38	-0.271618	0.18	0.309	2.39e-33	CM_3	Lama4
Slc27a1.1	8.59e-38	0.459623	0.676	0.671	2.87e-33	CM_3	Slc27a1
Myom2	5.02e-37	0.384875	0.727	0.712	1.68e-32	CM_3	Myom2
Ablim1.1	5.12e-37	0.297622	0.952	0.945	1.71e-32	CM_3	Ablim1
Pdlim3	5.51e-37	-0.28193	0.085	0.188	1.84e-32	CM_3	Pdlim3
Tmcc3.1	1.03e-36	-0.253409	0.115	0.226	3.44e-32	CM_3	Tmcc3
Rgs6.3	1.64e-36	-0.452644	0.595	0.725	5.48e-32	CM_3	Rgs6
Xpo6	2.25e-36	0.451461	0.459	0.411	7.51e-32	CM_3	Xpo6
Gmds	2.4e-36	-0.269049	0.109	0.217	8.01e-32	CM_3	Gmds
Cluh	4.22e-36	0.508617	0.497	0.454	1.41e-31	CM_3	Cluh
Tbc1d4	2.21e-35	0.310372	0.858	0.879	7.39e-31	CM_3	Tbc1d4
Lamb2.2	3.27e-35	0.424882	0.301	0.222	1.09e-30	CM_3	Lamb2
Atp5d.2	3.3e-35	0.327951	0.166	0.095	1.1e-30	CM_3	Atp5d
Lars2.3	7.69e-35	0.810775	0.289	0.218	2.57e-30	CM_3	Lars2
Msn	1.07e-34	-0.265876	0.046	0.126	3.57e-30	CM_3	Msn
Zeb1	1.14e-34	-0.262266	0.334	0.488	3.8e-30	CM_3	Zeb1
Macrod2	2.19e-34	-0.303534	0.489	0.626	7.31e-30	CM_3	Macrod2
Slc25a22.1	3.06e-34	0.382503	0.218	0.144	1.02e-29	CM_3	Slc25a22
Gm35330.1	3.34e-34	-0.272585	0.481	0.626	1.12e-29	CM_3	Gm35330
Lhfp.2	4.66e-34	-0.278474	0.398	0.543	1.56e-29	CM_3	Lhfp
Kcnd2	4.74e-34	-0.340269	0.77	0.838	1.58e-29	CM_3	Kcnd2
Adam19	9.07e-34	-0.302038	0.059	0.142	3.03e-29	CM_3	Adam19
Cdk14.1	3.24e-33	-0.375282	0.041	0.118	1.08e-28	CM_3	Cdk14
Gpsm1.2	4.73e-33	0.44596	0.397	0.33	1.58e-28	CM_3	Gpsm1
Gpcpd1.1	1.18e-32	-0.296689	0.771	0.853	3.93e-28	CM_3	Gpcpd1
Camta1	1.96e-32	0.341066	0.852	0.873	6.55e-28	CM_3	Camta1
Tmem82.1	8.6e-32	0.515538	0.263	0.192	2.88e-27	CM_3	Tmem82
B3galt1	1.19e-31	-0.341912	0.102	0.197	3.97e-27	CM_3	B3galt1
Inppl1.2	1.25e-31	0.409674	0.285	0.21	4.19e-27	CM_3	Inppl1
Pdzrn4.3	1.84e-31	-0.398452	0.39	0.517	6.14e-27	CM_3	Pdzrn4
Ahnak.2	2.19e-31	0.460831	0.295	0.222	7.31e-27	CM_3	Ahnak
Rmnd1	2.65e-31	0.488168	0.398	0.344	8.86e-27	CM_3	Rmnd1
Srrm1	6.88e-31	0.408715	0.563	0.554	2.3e-26	CM_3	Srrm1
Myo18a	6.95e-31	0.440849	0.602	0.608	2.32e-26	CM_3	Myo18a
Rilpl1.1	7.07e-31	0.396981	0.68	0.69	2.36e-26	CM_3	Rilpl1
Tns2.2	1.04e-30	0.440596	0.338	0.272	3.46e-26	CM_3	Tns2
Foxp2	1.77e-30	-0.288295	0.147	0.251	5.93e-26	CM_3	Foxp2
Plxnb1	6.87e-30	0.430959	0.283	0.215	2.3e-25	CM_3	Plxnb1
Kcnip2	7.32e-30	0.440853	0.552	0.514	2.45e-25	CM_3	Kcnip2
Dnmt3a	9.26e-30	0.401128	0.698	0.727	3.09e-25	CM_3	Dnmt3a
Gse1.1	2.37e-29	0.671816	0.559	0.568	7.9e-25	CM_3	Gse1
Angpt1.2	2.63e-29	-0.437355	0.488	0.609	8.8e-25	CM_3	Angpt1
Atp5l.2	4.32e-29	-0.263429	0.129	0.225	1.44e-24	CM_3	Atp5l
Arglu1.2	9.15e-29	-0.264761	0.131	0.229	3.06e-24	CM_3	Arglu1
Hnrnpl	1.03e-28	0.353663	0.626	0.64	3.45e-24	CM_3	Hnrnpl
Wnt5b	1.58e-28	0.541084	0.344	0.28	5.26e-24	CM_3	Wnt5b
Pygm.1	3.28e-28	0.444044	0.57	0.56	1.1e-23	CM_3	Pygm
Ggnbp1.2	4.79e-28	0.425898	0.413	0.365	1.6e-23	CM_3	Ggnbp1
Cpt1b.2	5.26e-28	0.576902	0.466	0.448	1.76e-23	CM_3	Cpt1b
Grina.1	6.77e-28	0.306081	0.188	0.123	2.26e-23	CM_3	Grina
Tmem150a.1	5.49e-27	0.42188	0.326	0.264	1.84e-22	CM_3	Tmem150a
Ice1	7.42e-27	0.443489	0.382	0.334	2.48e-22	CM_3	Ice1
Rgl2	9.71e-27	0.272759	0.153	0.093	3.25e-22	CM_3	Rgl2
Scn5a	2.38e-26	0.313263	0.795	0.808	7.95e-22	CM_3	Scn5a
Gm48099.1	2.68e-26	0.290254	0.169	0.106	8.95e-22	CM_3	Gm48099
Rgs7	4.52e-26	-0.263615	0.092	0.174	1.51e-21	CM_3	Rgs7
Fblim1	4.03e-25	0.362971	0.639	0.659	1.35e-20	CM_3	Fblim1
Nrap	5.42e-24	0.324911	0.7	0.726	1.81e-19	CM_3	Nrap
Nrbp2	1.52e-23	0.322611	0.172	0.114	5.09e-19	CM_3	Nrbp2
Sema3b	1.65e-23	0.330946	0.164	0.108	5.52e-19	CM_3	Sema3b
Akap8.1	2.94e-23	0.411076	0.343	0.293	9.83e-19	CM_3	Akap8
Mical3	3.73e-23	0.319092	0.753	0.792	1.25e-18	CM_3	Mical3
Ubr2	7.85e-23	0.375641	0.622	0.639	2.62e-18	CM_3	Ubr2
Lgr6	1.67e-22	0.402426	0.525	0.507	5.58e-18	CM_3	Lgr6
Speg	1.96e-22	0.274883	0.77	0.809	6.56e-18	CM_3	Speg
Gm17276	2.16e-22	0.465397	0.596	0.602	7.23e-18	CM_3	Gm17276
Vwa8.1	4.04e-22	0.300023	0.807	0.832	1.35e-17	CM_3	Vwa8
Plin4.2	4.68e-22	0.389246	0.429	0.399	1.56e-17	CM_3	Plin4
Bmp1.1	7.07e-22	0.305751	0.164	0.11	2.36e-17	CM_3	Bmp1
Pde4a	2.29e-21	0.431005	0.494	0.481	7.66e-17	CM_3	Pde4a
Lama5	2.33e-21	0.446633	0.365	0.32	7.78e-17	CM_3	Lama5
Ndrg4.1	3.37e-21	0.433737	0.411	0.37	1.13e-16	CM_3	Ndrg4
Tmem181a	8.24e-21	0.356855	0.271	0.217	2.75e-16	CM_3	Tmem181a
Tmem259.2	1.05e-20	0.387913	0.242	0.186	3.51e-16	CM_3	Tmem259
Srsf6.2	1.18e-20	0.352034	0.366	0.321	3.96e-16	CM_3	Srsf6
Plekha6	1.71e-20	0.294661	0.656	0.669	5.7e-16	CM_3	Plekha6
Slc38a3.1	1.73e-20	0.431299	0.41	0.377	5.77e-16	CM_3	Slc38a3
Med12	1.75e-20	0.288739	0.177	0.123	5.85e-16	CM_3	Med12
Art1.1	2.74e-20	0.288779	0.814	0.839	9.17e-16	CM_3	Art1
Kcnh2	4.5e-20	0.331298	0.257	0.203	1.5e-15	CM_3	Kcnh2
Tead3	1.49e-19	0.367093	0.216	0.165	4.97e-15	CM_3	Tead3
Dbp.1	8.01e-19	0.325359	0.354	0.308	2.68e-14	CM_3	Dbp
Flcn.2	1.13e-18	0.351373	0.253	0.201	3.78e-14	CM_3	Flcn
Mbd6	1.25e-18	0.281246	0.161	0.112	4.18e-14	CM_3	Mbd6
Nxf1.1	2.1e-18	0.287729	0.188	0.137	7e-14	CM_3	Nxf1
Adamtsl5	2.69e-18	0.417424	0.5	0.491	8.98e-14	CM_3	Adamtsl5
Zmynd8	3.78e-18	0.327586	0.681	0.717	1.26e-13	CM_3	Zmynd8
Plscr2	5.3e-18	0.352978	0.571	0.586	1.77e-13	CM_3	Plscr2
Psma4	5.97e-18	0.257173	0.157	0.109	1.99e-13	CM_3	Psma4
Rbm25	9.97e-18	0.287297	0.673	0.705	3.33e-13	CM_3	Rbm25
Rbm38.1	1.18e-17	0.396908	0.407	0.378	3.95e-13	CM_3	Rbm38
Prkce.1	1.65e-17	0.273393	0.797	0.842	5.51e-13	CM_3	Prkce
Gm12381	1.93e-17	-0.535058	0.184	0.255	6.45e-13	CM_3	Gm12381
Ulk1	2.07e-17	0.35525	0.215	0.167	6.93e-13	CM_3	Ulk1
Chd4.1	2.1e-17	0.371278	0.454	0.439	7.02e-13	CM_3	Chd4
Ptp4a3.2	2.53e-17	0.393741	0.303	0.256	8.45e-13	CM_3	Ptp4a3
Dipk1b	2.64e-17	0.336868	0.126	0.085	8.83e-13	CM_3	Dipk1b
Doc2g.2	5.08e-17	0.372288	0.413	0.385	1.7e-12	CM_3	Doc2g
Pabpn1.1	3.13e-16	0.508132	0.313	0.287	1.05e-11	CM_3	Pabpn1
Safb2	4.21e-16	0.35786	0.338	0.304	1.41e-11	CM_3	Safb2
Dennd4b	6.09e-16	0.290225	0.187	0.141	2.04e-11	CM_3	Dennd4b
Crip2.2	1.15e-15	0.393757	0.447	0.425	3.85e-11	CM_3	Crip2
Mef2d	2.64e-15	0.327717	0.586	0.619	8.83e-11	CM_3	Mef2d
Anapc5.2	3.19e-15	0.330245	0.316	0.278	1.07e-10	CM_3	Anapc5
Slc25a28	4.39e-15	0.290234	0.185	0.14	1.47e-10	CM_3	Slc25a28
Fgf1.1	4.91e-15	0.262167	0.81	0.841	1.64e-10	CM_3	Fgf1
Tnrc6c	9.81e-15	0.265685	0.752	0.799	3.28e-10	CM_3	Tnrc6c
Ucp3	1.36e-14	0.384006	0.336	0.304	4.53e-10	CM_3	Ucp3
Gigyf1	2.42e-14	0.322514	0.226	0.184	8.09e-10	CM_3	Gigyf1
Pitpnm2	2.45e-14	0.335927	0.532	0.553	8.21e-10	CM_3	Pitpnm2
Chkb.2	2.5e-14	0.408976	0.236	0.2	8.37e-10	CM_3	Chkb
Sned1	2.6e-14	0.356315	0.405	0.388	8.67e-10	CM_3	Sned1
Atp1a2	3.26e-14	0.328096	0.568	0.592	1.09e-09	CM_3	Atp1a2
Synj2	3.35e-14	0.340164	0.511	0.528	1.12e-09	CM_3	Synj2
Paxbp1	4.71e-14	0.346152	0.401	0.386	1.57e-09	CM_3	Paxbp1
Fbxo31.1	7.88e-14	0.334587	0.281	0.244	2.63e-09	CM_3	Fbxo31
Echdc2.2	8.14e-14	0.299909	0.3	0.263	2.72e-09	CM_3	Echdc2
Pbxip1	8.73e-14	0.317197	0.176	0.135	2.92e-09	CM_3	Pbxip1
Kmt2d	9.05e-14	0.268204	0.217	0.175	3.02e-09	CM_3	Kmt2d
Acadm	1.01e-13	0.312772	0.56	0.583	3.36e-09	CM_3	Acadm
Dgke	2.32e-13	0.339205	0.296	0.262	7.74e-09	CM_3	Dgke
Myl2.2	2.6e-13	0.493667	0.517	0.534	8.69e-09	CM_3	Myl2
Srrt	2.62e-13	0.268509	0.166	0.126	8.74e-09	CM_3	Srrt
Ptprs	3.55e-13	0.354387	0.359	0.338	1.19e-08	CM_3	Ptprs
Acsl1	4.04e-13	0.262072	0.744	0.786	1.35e-08	CM_3	Acsl1
Clk3	4.11e-13	0.286645	0.183	0.143	1.37e-08	CM_3	Clk3
Rps6ka2	5.27e-13	0.391985	0.395	0.381	1.76e-08	CM_3	Rps6ka2
Ubp1	5.72e-13	0.309949	0.27	0.233	1.91e-08	CM_3	Ubp1
Prkca.1	7.94e-13	0.276339	0.738	0.77	2.65e-08	CM_3	Prkca
Srpk3	2.51e-12	0.262745	0.172	0.133	8.39e-08	CM_3	Srpk3
Plod2	3.47e-12	0.407821	0.341	0.321	1.16e-07	CM_3	Plod2
Ogdhl.1	3.88e-12	0.314126	0.23	0.191	1.3e-07	CM_3	Ogdhl
Eif5	4.82e-12	0.307126	0.27	0.236	1.61e-07	CM_3	Eif5
Zfp973	7.62e-12	0.272169	0.18	0.142	2.55e-07	CM_3	Zfp973
Hsd17b11	7.72e-12	0.336911	0.171	0.133	2.58e-07	CM_3	Hsd17b11
Cdh4.1	8.1e-12	0.473132	0.313	0.279	2.71e-07	CM_3	Cdh4
Las1l	1.73e-11	0.313801	0.313	0.286	5.77e-07	CM_3	Las1l
Fbrsl1	1.82e-11	0.339144	0.434	0.431	6.07e-07	CM_3	Fbrsl1
Zfp612	2.08e-11	0.342327	0.322	0.303	6.94e-07	CM_3	Zfp612
Slc12a7	2.16e-11	0.311335	0.539	0.559	7.21e-07	CM_3	Slc12a7
Klhl38	4.06e-11	0.278612	0.276	0.243	1.36e-06	CM_3	Klhl38
Brd9	5.21e-11	0.268106	0.174	0.138	1.74e-06	CM_3	Brd9
Ankrd1.2	5.54e-11	0.43748	0.409	0.37	1.85e-06	CM_3	Ankrd1
Gm47283.1	7.72e-11	0.296452	0.222	0.187	2.58e-06	CM_3	Gm47283
Atad3a.1	1.24e-10	0.346641	0.344	0.326	4.14e-06	CM_3	Atad3a
Asap3	1.93e-10	0.334287	0.327	0.303	6.45e-06	CM_3	Asap3
Smad3	2e-10	0.365252	0.295	0.269	6.67e-06	CM_3	Smad3
Zmiz1	2.16e-10	0.328539	0.527	0.56	7.23e-06	CM_3	Zmiz1
Tcap.2	2.25e-10	0.334237	0.603	0.614	7.52e-06	CM_3	Tcap
Grip2	2.41e-10	0.285868	0.268	0.237	8.05e-06	CM_3	Grip2
Ube2o	2.52e-10	0.308151	0.211	0.178	8.42e-06	CM_3	Ube2o
Smyd2	2.82e-10	0.290503	0.374	0.364	9.42e-06	CM_3	Smyd2
Prpf4b	4.7e-10	0.275225	0.626	0.687	1.57e-05	CM_3	Prpf4b
Agpat2	5.87e-10	0.25181	0.113	0.083	1.96e-05	CM_3	Agpat2
Lipe	6.2e-10	0.266751	0.182	0.149	2.07e-05	CM_3	Lipe
Sorcs2	6.33e-10	0.375032	0.369	0.357	2.11e-05	CM_3	Sorcs2
Cdk8.1	7.55e-10	0.699162	0.448	0.51	2.52e-05	CM_3	Cdk8
Cpt1a	1.16e-09	0.318388	0.397	0.396	3.87e-05	CM_3	Cpt1a
Rrad.2	1.67e-09	0.351542	0.305	0.283	5.58e-05	CM_3	Rrad
Ivd	1.74e-09	0.344946	0.421	0.431	5.83e-05	CM_3	Ivd
Zfp523	2.42e-09	0.293693	0.189	0.159	8.1e-05	CM_3	Zfp523
Calcoco1	3.83e-09	0.276876	0.26	0.234	0.000127888	CM_3	Calcoco1
Peli2	4.26e-09	0.311009	0.223	0.193	0.000142256	CM_3	Peli2
Mgll	6.02e-09	0.251973	0.127	0.097	0.000201041	CM_3	Mgll
Myo9b	6.08e-09	0.300609	0.361	0.353	0.00020315	CM_3	Myo9b
Pcyt2	6.62e-09	0.302472	0.25	0.223	0.000221419	CM_3	Pcyt2
Nceh1	9.94e-09	0.29618	0.556	0.58	0.00033216	CM_3	Nceh1
Nfix	1.24e-08	0.261059	0.516	0.544	0.000415092	CM_3	Nfix
Usp2.2	1.36e-08	0.270184	0.567	0.601	0.000455752	CM_3	Usp2
Sf3b1.1	1.41e-08	0.270713	0.478	0.505	0.000472784	CM_3	Sf3b1
Dgkz	1.44e-08	0.303779	0.231	0.205	0.000482787	CM_3	Dgkz
Ddx39b.2	1.85e-08	0.284689	0.252	0.227	0.000616985	CM_3	Ddx39b
Lzts2	1.93e-08	0.315251	0.313	0.302	0.000643407	CM_3	Lzts2
Plec	2e-08	0.319834	0.311	0.297	0.00066821	CM_3	Plec
Tesmin	2.03e-08	0.3687	0.298	0.283	0.00067709	CM_3	Tesmin
Trrap	2.25e-08	0.29315	0.305	0.289	0.000752085	CM_3	Trrap
Appl2	2.59e-08	0.268625	0.507	0.539	0.000865075	CM_3	Appl2
Esrra	4.2e-08	0.290379	0.477	0.497	0.00140359	CM_3	Esrra
Dusp11	4.36e-08	0.333892	0.374	0.376	0.00145665	CM_3	Dusp11
Crhr2	4.63e-08	0.325272	0.392	0.398	0.00154903	CM_3	Crhr2
Adra1a	4.98e-08	0.321414	0.565	0.582	0.00166431	CM_3	Adra1a
Myo5c	5.74e-08	0.339788	0.346	0.34	0.00191873	CM_3	Myo5c
Cuedc1	6.22e-08	0.319987	0.491	0.521	0.00207938	CM_3	Cuedc1
Jph2	6.61e-08	0.257356	0.805	0.845	0.0022077	CM_3	Jph2
Dsg2	8.09e-08	0.267791	0.609	0.651	0.00270531	CM_3	Dsg2
Dhx36	8.82e-08	0.290118	0.411	0.417	0.00294635	CM_3	Dhx36
Rbm5	1.11e-07	0.262494	0.522	0.561	0.00372646	CM_3	Rbm5
Auh	1.27e-07	0.305447	0.393	0.401	0.0042591	CM_3	Auh
Pdcd11	1.41e-07	0.266924	0.197	0.172	0.0047094	CM_3	Pdcd11
Crat	1.46e-07	0.287961	0.234	0.21	0.0048723	CM_3	Crat
Irak1	1.53e-07	0.251464	0.186	0.159	0.0051289	CM_3	Irak1
Miga2	1.68e-07	0.347298	0.483	0.518	0.00561547	CM_3	Miga2
Mafg	2.02e-07	0.300582	0.286	0.271	0.00675928	CM_3	Mafg
Osbp2	2.07e-07	0.334034	0.46	0.482	0.00691812	CM_3	Osbp2
Cmss1.3	2.57e-07	0.89854	0.567	0.762	0.00859658	CM_3	Cmss1
Preb	2.57e-07	0.260846	0.184	0.158	0.00860239	CM_3	Preb
Peak1.2	2.68e-07	0.270799	0.399	0.55	0.00896802	CM_3	Peak1
Ybx2.1	3.15e-07	0.269572	0.223	0.199	0.0105304	CM_3	Ybx2
Baz1b	3.3e-07	0.273201	0.478	0.509	0.0110231	CM_3	Baz1b
Cux2	4.93e-07	0.320959	0.447	0.466	0.0164833	CM_3	Cux2
Pkm.2	5.07e-07	0.303293	0.332	0.322	0.0169333	CM_3	Pkm
Dcaf11	5.07e-07	0.286117	0.253	0.234	0.0169434	CM_3	Dcaf11
Irx4	5.75e-07	0.261261	0.19	0.166	0.0192143	CM_3	Irx4
Nisch.2	6.91e-07	0.279533	0.464	0.489	0.0230969	CM_3	Nisch
Agap1	7.12e-07	0.27513	0.525	0.565	0.0237923	CM_3	Agap1
Thra	7.26e-07	0.266406	0.259	0.237	0.0242588	CM_3	Thra
Krba1	1.06e-06	0.300226	0.329	0.327	0.0353516	CM_3	Krba1
Ntn1.1	1.43e-06	0.279896	0.588	0.626	0.0478621	CM_3	Ntn1
Rpl3l	1.58e-06	0.331937	0.516	0.545	0.0527844	CM_3	Rpl3l
Ncor2	2.16e-06	0.284469	0.297	0.287	0.0723523	CM_3	Ncor2
Agpat3	2.21e-06	0.301899	0.358	0.362	0.0737822	CM_3	Agpat3
Arhgef7	2.45e-06	0.271902	0.417	0.43	0.0818785	CM_3	Arhgef7
Dgat2	2.46e-06	0.325182	0.433	0.446	0.082378	CM_3	Dgat2
Xirp1	2.59e-06	0.290662	0.131	0.11	0.0864875	CM_3	Xirp1
Wnk2	2.66e-06	0.26462	0.583	0.635	0.0890387	CM_3	Wnk2
Fxyd1.1	2.98e-06	0.270707	0.32	0.309	0.0995938	CM_3	Fxyd1
Luc7l	3.48e-06	0.271761	0.414	0.435	0.11621	CM_3	Luc7l
Ablim2	3.51e-06	0.290771	0.41	0.425	0.117361	CM_3	Ablim2
Dlgap4	3.71e-06	0.296827	0.332	0.33	0.123845	CM_3	Dlgap4
Anks1	3.8e-06	0.251129	0.568	0.61	0.127065	CM_3	Anks1
Npc1	3.94e-06	0.293658	0.29	0.282	0.131522	CM_3	Npc1
Plekhm2	4.61e-06	0.280629	0.686	0.74	0.15412	CM_3	Plekhm2
Trim63	4.69e-06	0.283099	0.591	0.632	0.156693	CM_3	Trim63
Eif4g1.1	5.05e-06	0.295641	0.398	0.413	0.168726	CM_3	Eif4g1
2610035D17Rik	5.65e-06	0.310882	0.282	0.269	0.188783	CM_3	2610035D17Rik
Tom1	5.91e-06	0.28486	0.504	0.543	0.197569	CM_3	Tom1
Kmt2a	5.94e-06	0.25989	0.484	0.525	0.198389	CM_3	Kmt2a
Lrrc14b	6.22e-06	0.262467	0.257	0.242	0.207729	CM_3	Lrrc14b
Hjv	6.54e-06	0.253984	0.137	0.117	0.218414	CM_3	Hjv
Rap1gap	7.03e-06	0.257728	0.172	0.152	0.235017	CM_3	Rap1gap
Camk2a	7.29e-06	0.285444	0.43	0.458	0.243743	CM_3	Camk2a
Ubr4	9.48e-06	0.276746	0.302	0.296	0.316785	CM_3	Ubr4
Cyfip2	9.65e-06	0.257425	0.519	0.566	0.322554	CM_3	Cyfip2
Synpo	1.17e-05	0.28107	0.309	0.303	0.391456	CM_3	Synpo
Map7d1.2	1.28e-05	0.257707	0.279	0.267	0.426915	CM_3	Map7d1
Rai1	1.33e-05	0.264792	0.509	0.547	0.444551	CM_3	Rai1
Ehbp1l1	1.49e-05	0.255935	0.288	0.281	0.498818	CM_3	Ehbp1l1
Parp3.1	1.66e-05	0.279768	0.184	0.165	0.554479	CM_3	Parp3
Mtss1	2.05e-05	0.271761	0.432	0.451	0.684818	CM_3	Mtss1
Eif4g2	2.35e-05	0.254776	0.387	0.405	0.784643	CM_3	Eif4g2
Cpsf7	3.06e-05	0.279607	0.301	0.302	1	CM_3	Cpsf7
Ephx2	3.77e-05	0.273909	0.376	0.391	1	CM_3	Ephx2
Mapt	3.87e-05	0.310082	0.487	0.522	1	CM_3	Mapt
Usp20	4.14e-05	0.283572	0.294	0.291	1	CM_3	Usp20
Sbk1	4.15e-05	0.30788	0.587	0.628	1	CM_3	Sbk1
Mon2	4.57e-05	0.277813	0.464	0.503	1	CM_3	Mon2
Abcc8	4.73e-05	0.328574	0.316	0.317	1	CM_3	Abcc8
Tcea3	7.05e-05	0.29208	0.373	0.389	1	CM_3	Tcea3
Usp7	9.23e-05	0.268041	0.311	0.314	1	CM_3	Usp7
Gramd4	0.000103033	0.299184	0.295	0.295	1	CM_3	Gramd4
Airn	0.000119896	0.307121	0.657	0.708	1	CM_3	Airn
Man1c1	0.000130455	0.314063	0.279	0.274	1	CM_3	Man1c1
Pank4	0.000135678	0.259737	0.179	0.163	1	CM_3	Pank4
Hk2	0.000175192	0.267772	0.656	0.72	1	CM_3	Hk2
Cish	0.000200389	0.345498	0.26	0.258	1	CM_3	Cish
Kcnk3	0.000201142	0.315606	0.4	0.421	1	CM_3	Kcnk3
Ppard	0.000257132	0.305312	0.325	0.333	1	CM_3	Ppard
Dok7	0.000278413	0.251074	0.205	0.193	1	CM_3	Dok7
Kcnb1	0.000477735	0.316968	0.327	0.335	1	CM_3	Kcnb1
Atp9a	0.000504542	0.267406	0.264	0.262	1	CM_3	Atp9a
Mapk8ip3	0.00052851	0.251576	0.316	0.322	1	CM_3	Mapk8ip3
Lima1	0.000559847	0.270821	0.26	0.252	1	CM_3	Lima1
Secisbp2	0.00107594	0.273429	0.356	0.377	1	CM_3	Secisbp2
Spta1	0.00112576	0.272796	0.346	0.357	1	CM_3	Spta1
Asb10	0.00135253	0.268823	0.249	0.247	1	CM_3	Asb10
Rhot2	0.00172707	0.256324	0.135	0.124	1	CM_3	Rhot2
4632404M16Rik	0.00424494	0.306461	0.155	0.149	1	CM_3	4632404M16Rik
2610507B11Rik	0.00437347	0.252396	0.319	0.33	1	CM_3	2610507B11Rik
Rif1	0.00659355	0.25002	0.362	0.389	1	CM_3	Rif1
Scarf1	0.00711495	0.2775	0.357	0.377	1	CM_3	Scarf1
Fgf12	0	4.55467	0.501	0.001	0	CM_4	Fgf12
Slit3	0	4.32937	0.906	0.038	0	CM_4	Slit3
Slit2	0	4.11356	0.639	0.015	0	CM_4	Slit2
Sema3a	0	3.56291	0.629	0.037	0	CM_4	Sema3a
Ephb1	0	3.47867	0.778	0.014	0	CM_4	Ephb1
Grip1	0	3.36328	0.463	0.003	0	CM_4	Grip1
Cdk14.2	0	3.29315	0.759	0.104	0	CM_4	Cdk14
Kirrel3	0	3.28745	0.595	0.012	0	CM_4	Kirrel3
Plxdc2	0	3.08817	0.719	0.065	0	CM_4	Plxdc2
Fbn2	0	3.00644	0.82	0.057	0	CM_4	Fbn2
Etv1	0	2.74213	0.74	0.053	0	CM_4	Etv1
Slc24a2	0	2.71204	0.662	0.051	0	CM_4	Slc24a2
Slc16a12	0	2.35403	0.593	0.028	0	CM_4	Slc16a12
Gm40649	0	2.22859	0.52	0.066	0	CM_4	Gm40649
Cntn2	0	2.11587	0.486	0.001	0	CM_4	Cntn2
Cacnb4	0	2.04569	0.413	0.006	0	CM_4	Cacnb4
Phactr1	0	1.95889	0.585	0.056	0	CM_4	Phactr1
Ncam1	0	1.91076	0.56	0.024	0	CM_4	Ncam1
Drd2	0	1.8384	0.34	0.002	0	CM_4	Drd2
Col4a3	0	1.79645	0.522	0.033	0	CM_4	Col4a3
Nppa	0	1.6704	0.27	0.004	0	CM_4	Nppa
Robo1	0	1.62906	0.254	0.001	0	CM_4	Robo1
Gria3	0	1.6178	0.365	0.012	0	CM_4	Gria3
Col4a4	0	1.4592	0.43	0.013	0	CM_4	Col4a4
Dapk2	0	1.45347	0.363	0.026	0	CM_4	Dapk2
Alcam	0	1.24187	0.273	0.003	0	CM_4	Alcam
Vcan	0	1.20032	0.235	0.001	0	CM_4	Vcan
Lmntd1	0	1.19055	0.371	0.025	0	CM_4	Lmntd1
Cntn3	0	1.1711	0.31	0.016	0	CM_4	Cntn3
Dpysl2	0	1.15215	0.317	0.001	0	CM_4	Dpysl2
Cacna1h	0	1.09218	0.371	0.024	0	CM_4	Cacna1h
Adamts19	0	1.06637	0.275	0.007	0	CM_4	Adamts19
Stk32a	0	1.06436	0.252	0.009	0	CM_4	Stk32a
Lhfpl2	0	1.04602	0.31	0.012	0	CM_4	Lhfpl2
Scn10a	0	1.0263	0.317	0.006	0	CM_4	Scn10a
Akt3	0	0.998049	0.229	0.002	0	CM_4	Akt3
Arhgap31	0	0.997435	0.222	0.002	0	CM_4	Arhgap31
Tmem163	0	0.958886	0.115	0.002	0	CM_4	Tmem163
Srgap1	0	0.946867	0.249	0.001	0	CM_4	Srgap1
Gja5	0	0.836579	0.229	0.006	0	CM_4	Gja5
Sbk3	0	0.826921	0.249	0.003	0	CM_4	Sbk3
Trps1	0	0.818574	0.166	0.003	0	CM_4	Trps1
Zbtb7c	0	0.763518	0.231	0.008	0	CM_4	Zbtb7c
Sema5a	0	0.757692	0.201	0.004	0	CM_4	Sema5a
Gdnf	0	0.725375	0.243	0.007	0	CM_4	Gdnf
Elmo1	0	0.714912	0.153	0.003	0	CM_4	Elmo1
App	0	0.696832	0.189	0.002	0	CM_4	App
Tbc1d1	0	0.676656	0.193	0.001	0	CM_4	Tbc1d1
Flrt2	0	0.644438	0.193	0.006	0	CM_4	Flrt2
Gm16863	0	0.637199	0.203	0.004	0	CM_4	Gm16863
Cpne5	0	0.603345	0.136	0.002	0	CM_4	Cpne5
Stard10	0	0.585982	0.195	0.007	0	CM_4	Stard10
Timp3	0	0.516145	0.145	0.002	0	CM_4	Timp3
Ntf3	0	0.479231	0.122	0.001	0	CM_4	Ntf3
Stxbp6	0	0.475926	0.151	0.005	0	CM_4	Stxbp6
Cdh6	0	0.463135	0.122	0.001	0	CM_4	Cdh6
Gm49750	0	0.446408	0.132	0.002	0	CM_4	Gm49750
Slc9a9	0	0.435126	0.132	0.003	0	CM_4	Slc9a9
Nap1l5	0	0.381309	0.117	0.003	0	CM_4	Nap1l5
Spaca6	0	0.373829	0.147	0.001	0	CM_4	Spaca6
Ksr1	0	0.368089	0.113	0.001	0	CM_4	Ksr1
Adamtsl2	0	0.348179	0.115	0.001	0	CM_4	Adamtsl2
Cald1	0	0.342674	0.105	0.002	0	CM_4	Cald1
Cyp2d22	0	0.323969	0.115	0	0	CM_4	Cyp2d22
Dgki	1.92e-306	1.4787	0.394	0.042	6.41e-302	CM_4	Dgki
Edar	2.05e-302	0.886278	0.273	0.019	6.86e-298	CM_4	Edar
Tcaf1	5.11e-300	0.292117	0.109	0.003	1.71e-295	CM_4	Tcaf1
Plcl1.1	1.24e-293	2.04429	0.604	0.102	4.16e-289	CM_4	Plcl1
Gm36173	5.65e-289	1.3649	0.304	0.026	1.89e-284	CM_4	Gm36173
Plekha7	1.28e-284	1.57934	0.556	0.09	4.26e-280	CM_4	Plekha7
B3galt1.1	1.01e-279	2.37105	0.748	0.183	3.37e-275	CM_4	B3galt1
Sbk2	1.5e-279	0.511273	0.176	0.008	5e-275	CM_4	Sbk2
Podn	5.44e-266	0.800539	0.264	0.021	1.82e-261	CM_4	Podn
Grhl1	3.93e-262	0.732275	0.264	0.021	1.31e-257	CM_4	Grhl1
Cacna2d2	2.61e-257	0.70819	0.184	0.01	8.72e-253	CM_4	Cacna2d2
Rgs6.4	5.5e-253	2.92517	0.977	0.713	1.84e-248	CM_4	Rgs6
Rgs7.1	1.27e-237	2.17251	0.669	0.162	4.25e-233	CM_4	Rgs7
Gm35041.1	2.74e-237	2.34517	0.755	0.223	9.15e-233	CM_4	Gm35041
Tmem108	1.53e-234	1.80508	0.558	0.107	5.12e-230	CM_4	Tmem108
Epb41l2	1.02e-230	0.365255	0.132	0.006	3.4e-226	CM_4	Epb41l2
Mpped2.1	1.76e-218	2.76192	0.927	0.54	5.9e-214	CM_4	Mpped2
Ntm	2.02e-215	1.76378	0.43	0.068	6.76e-211	CM_4	Ntm
Hmgn3	2.18e-208	0.573162	0.184	0.013	7.3e-204	CM_4	Hmgn3
Rbfox1.2	6.78e-207	2.70861	0.971	0.863	2.27e-202	CM_4	Rbfox1
Hip1	2.69e-205	1.69641	0.688	0.186	8.99e-201	CM_4	Hip1
Rabgap1l.1	1.03e-190	2.19807	0.956	0.751	3.45e-186	CM_4	Rabgap1l
Fam49a	7.68e-184	0.406205	0.149	0.009	2.57e-179	CM_4	Fam49a
Plcb1	1.55e-183	1.17235	0.208	0.018	5.17e-179	CM_4	Plcb1
Prune2	1.37e-180	-2.76434	0.159	0.836	4.59e-176	CM_4	Prune2
Neat1.3	4.03e-180	-2.15066	0.4	0.956	1.35e-175	CM_4	Neat1
Slc16a7	1.24e-175	1.16094	0.403	0.07	4.13e-171	CM_4	Slc16a7
Fgf14.3	4.56e-174	2.00549	0.956	0.617	1.53e-169	CM_4	Fgf14
Zc3h12b	1.16e-168	0.420724	0.128	0.008	3.88e-164	CM_4	Zc3h12b
Maml2	2.92e-168	0.795717	0.199	0.018	9.75e-164	CM_4	Maml2
Tbxas1	6.75e-166	0.636336	0.229	0.024	2.26e-161	CM_4	Tbxas1
Irx2	2.56e-165	0.670569	0.222	0.023	8.57e-161	CM_4	Irx2
Fhl2	7.1e-164	-1.80612	0.509	0.981	2.37e-159	CM_4	Fhl2
Galnt18	1.77e-158	1.6128	0.572	0.16	5.9e-154	CM_4	Galnt18
Gabrg3	3.63e-157	1.06179	0.164	0.013	1.21e-152	CM_4	Gabrg3
Bmpr1b	1.31e-155	0.890394	0.195	0.019	4.38e-151	CM_4	Bmpr1b
Dpysl3	5.13e-155	1.66821	0.6	0.178	1.71e-150	CM_4	Dpysl3
Sdk1	2.1e-152	1.28921	0.335	0.056	7.02e-148	CM_4	Sdk1
Cacna1c.2	8.95e-151	-1.04164	0.969	0.986	2.99e-146	CM_4	Cacna1c
Slco3a1.1	1.42e-147	1.78613	0.906	0.641	4.74e-143	CM_4	Slco3a1
Ivns1abp.2	1.74e-144	-1.7313	0.486	0.928	5.81e-140	CM_4	Ivns1abp
Kcnd2.1	4.43e-139	-2.44746	0.304	0.84	1.48e-134	CM_4	Kcnd2
Ints6l	1.03e-138	0.599852	0.235	0.03	3.45e-134	CM_4	Ints6l
Eda	2.81e-137	0.530428	0.103	0.006	9.4e-133	CM_4	Eda
Zfp579	1.82e-135	0.767188	0.285	0.045	6.09e-131	CM_4	Zfp579
Tmem51	1.42e-132	0.599003	0.249	0.035	4.74e-128	CM_4	Tmem51
Thsd4.1	4.88e-132	1.64862	0.828	0.438	1.63e-127	CM_4	Thsd4
Pdlim3.1	9.88e-130	1.45168	0.572	0.176	3.3e-125	CM_4	Pdlim3
Gm41414	1.04e-127	0.506803	0.151	0.014	3.48e-123	CM_4	Gm41414
Sdc4	1.13e-127	0.646029	0.241	0.034	3.77e-123	CM_4	Sdc4
Jam3	5.99e-127	0.67776	0.231	0.032	2e-122	CM_4	Jam3
Slc25a13	6.82e-126	-1.66641	0.277	0.817	2.28e-121	CM_4	Slc25a13
Zfp462	7.45e-126	1.14993	0.438	0.108	2.49e-121	CM_4	Zfp462
Kalrn	3.8e-124	1.4314	0.717	0.31	1.27e-119	CM_4	Kalrn
AC124490.1	4.03e-124	0.388406	0.119	0.009	1.35e-119	CM_4	AC124490.1
Slc35f3	4.63e-122	0.63998	0.124	0.01	1.55e-117	CM_4	Slc35f3
Pcdh11x	5.64e-122	0.892658	0.151	0.015	1.89e-117	CM_4	Pcdh11x
Dock3	5.45e-121	0.335424	0.117	0.009	1.82e-116	CM_4	Dock3
Ptprd.1	2.27e-117	1.67244	0.899	0.638	7.58e-113	CM_4	Ptprd
Tnnt2.3	1.79e-115	-1.26346	0.803	0.976	5.99e-111	CM_4	Tnnt2
Tacc1	4.62e-114	1.21819	0.524	0.163	1.54e-109	CM_4	Tacc1
Sema3c	1.62e-113	1.20316	0.457	0.128	5.4e-109	CM_4	Sema3c
Pde4dip	3.84e-112	-0.852822	0.95	0.985	1.28e-107	CM_4	Pde4dip
Sulf2	4.03e-111	1.24295	0.541	0.18	1.35e-106	CM_4	Sulf2
Sorcs2.1	2.81e-110	1.31187	0.74	0.353	9.38e-106	CM_4	Sorcs2
Pde3a.2	3.28e-110	-1.61212	0.344	0.821	1.1e-105	CM_4	Pde3a
Gm31659	3.56e-109	0.380465	0.143	0.014	1.19e-104	CM_4	Gm31659
Syne2	8.4e-107	0.520758	0.224	0.035	2.81e-102	CM_4	Syne2
Gm20619	3.05e-106	-1.48088	0.363	0.836	1.02e-101	CM_4	Gm20619
Tacc2.1	3.98e-106	-1.20483	0.698	0.92	1.33e-101	CM_4	Tacc2
Gcnt2	5.06e-106	0.415839	0.113	0.009	1.69e-101	CM_4	Gcnt2
Ano6	9.62e-102	0.847891	0.342	0.078	3.21e-97	CM_4	Ano6
Dok5	6.6e-101	0.4948	0.155	0.018	2.21e-96	CM_4	Dok5
Cacna1g	1.31e-99	0.907032	0.363	0.091	4.39e-95	CM_4	Cacna1g
Mef2c.1	1.9e-99	-1.59018	0.063	0.607	6.36e-95	CM_4	Mef2c
Spred1	1.49e-98	0.73878	0.312	0.069	4.98e-94	CM_4	Spred1
Hs3st5	2.42e-98	-1.2647	0.553	0.893	8.08e-94	CM_4	Hs3st5
Coro6.3	4.85e-98	-1.56353	0.382	0.815	1.62e-93	CM_4	Coro6
Pdzrn3.1	1.44e-96	1.50572	0.868	0.665	4.83e-92	CM_4	Pdzrn3
Ppip5k2	1.35e-93	-1.25529	0.505	0.845	4.5e-89	CM_4	Ppip5k2
Gsg1l	2.4e-93	0.997038	0.507	0.176	8.02e-89	CM_4	Gsg1l
Raph1.1	1.82e-91	-1.4198	0.22	0.718	6.1e-87	CM_4	Raph1
Slc4a4.1	1.56e-89	-1.42038	0.254	0.72	5.22e-85	CM_4	Slc4a4
Pde7b	2.27e-89	1.25561	0.908	0.681	7.6e-85	CM_4	Pde7b
Ston2	3.92e-89	0.966868	0.392	0.112	1.31e-84	CM_4	Ston2
Cdh13.1	3.25e-88	0.950424	0.983	0.941	1.08e-83	CM_4	Cdh13
Grm1.1	7.93e-88	-1.50378	0.482	0.839	2.65e-83	CM_4	Grm1
Rbms3	4.89e-86	0.857435	0.287	0.065	1.64e-81	CM_4	Rbms3
Dlgap1	1.28e-85	0.745703	0.117	0.013	4.27e-81	CM_4	Dlgap1
Runx1t1	3.42e-85	0.720718	0.249	0.051	1.14e-80	CM_4	Runx1t1
Cacna1d	1.52e-82	1.01666	0.187	0.031	5.07e-78	CM_4	Cacna1d
Sptbn1	5.75e-82	-0.906801	0.797	0.939	1.92e-77	CM_4	Sptbn1
Rgs12	5.64e-80	0.713934	0.314	0.08	1.89e-75	CM_4	Rgs12
Pde7a	1.05e-79	-1.51162	0.17	0.623	3.5e-75	CM_4	Pde7a
Ephb3	8.62e-79	0.500266	0.235	0.048	2.88e-74	CM_4	Ephb3
Mid1.1	1.48e-78	-1.55489	0.117	0.587	4.95e-74	CM_4	Mid1
Stk39	1.39e-77	-1.44374	0.354	0.735	4.65e-73	CM_4	Stk39
Shisa6	1.4e-77	0.874509	0.252	0.055	4.67e-73	CM_4	Shisa6
Rpl3l.1	1.82e-76	-1.3864	0.084	0.548	6.08e-72	CM_4	Rpl3l
Rbm20.1	3.91e-76	-0.579135	0.971	0.978	1.31e-71	CM_4	Rbm20
Kctd16	4.96e-76	1.32513	0.281	0.069	1.66e-71	CM_4	Kctd16
Ryr2.2	5.74e-76	-0.739418	0.956	0.988	1.92e-71	CM_4	Ryr2
Rp1	4.78e-75	1.20665	0.338	0.096	1.6e-70	CM_4	Rp1
Adk.2	1.83e-73	-0.848521	0.813	0.93	6.12e-69	CM_4	Adk
Ncald	8.6e-73	1.06027	0.751	0.465	2.87e-68	CM_4	Ncald
Prkd1	3.13e-72	1.11784	0.532	0.225	1.05e-67	CM_4	Prkd1
Trim7.1	1.05e-70	-1.2818	0.166	0.595	3.5e-66	CM_4	Trim7
Gpcpd1.2	3.37e-70	-1.22968	0.566	0.851	1.13e-65	CM_4	Gpcpd1
Siae	2.13e-69	0.581654	0.143	0.022	7.13e-65	CM_4	Siae
Rasgef1b	3.08e-69	1.61574	0.57	0.267	1.03e-64	CM_4	Rasgef1b
Gm29530	3.77e-68	0.326742	0.117	0.015	1.26e-63	CM_4	Gm29530
Ext1.1	4.38e-66	1.36708	0.828	0.63	1.46e-61	CM_4	Ext1
Zfp697	9.25e-66	1.134	0.759	0.515	3.09e-61	CM_4	Zfp697
Vegfa.3	7.07e-65	-1.16596	0.6	0.846	2.36e-60	CM_4	Vegfa
Shisa4	7.48e-65	0.34606	0.149	0.024	2.5e-60	CM_4	Shisa4
Gm35330.2	3.61e-64	-1.63523	0.247	0.621	1.21e-59	CM_4	Gm35330
Immp2l.1	6.97e-64	-1.03289	0.537	0.849	2.33e-59	CM_4	Immp2l
Greb1	1.43e-63	0.364781	0.138	0.022	4.77e-59	CM_4	Greb1
Kcnip2.1	2.36e-61	-1.18139	0.113	0.522	7.87e-57	CM_4	Kcnip2
Hlf	4e-61	1.03816	0.522	0.236	1.34e-56	CM_4	Hlf
Gjc1	1.22e-60	0.715979	0.338	0.109	4.08e-56	CM_4	Gjc1
Anapc15	2.65e-60	0.271124	0.105	0.014	8.87e-56	CM_4	Anapc15
Pdlim7	2.72e-60	0.314887	0.134	0.021	9.1e-56	CM_4	Pdlim7
Mast4.3	7.2e-60	1.17032	0.665	0.393	2.41e-55	CM_4	Mast4
Adgrl1	8.96e-60	0.588859	0.352	0.116	3e-55	CM_4	Adgrl1
Cobll1.1	1.15e-57	-1.02429	0.396	0.744	3.83e-53	CM_4	Cobll1
Ldlrad4	1.39e-57	1.15987	0.763	0.522	4.65e-53	CM_4	Ldlrad4
Sorbs2.2	1.56e-57	-0.619669	0.92	0.959	5.22e-53	CM_4	Sorbs2
Ppfia4	1e-56	0.285378	0.111	0.016	3.34e-52	CM_4	Ppfia4
Kcnip4	1.17e-56	0.726937	0.203	0.048	3.92e-52	CM_4	Kcnip4
Lpl	1.72e-56	-1.1667	0.373	0.722	5.73e-52	CM_4	Lpl
Gm30262	2.06e-56	0.700587	0.308	0.097	6.88e-52	CM_4	Gm30262
Aff2	3.6e-56	0.981445	0.627	0.335	1.2e-51	CM_4	Aff2
Apex2	1.25e-55	-1.41499	0.199	0.558	4.19e-51	CM_4	Apex2
March3	1.58e-55	-1.21465	0.034	0.401	5.29e-51	CM_4	March3
Arhgap24	1.17e-54	0.84467	0.398	0.153	3.92e-50	CM_4	Arhgap24
Epha7	3.07e-54	0.836775	0.377	0.14	1.03e-49	CM_4	Epha7
Ablim1.2	4e-54	-0.71481	0.862	0.946	1.34e-49	CM_4	Ablim1
Iqsec1	7.03e-54	0.819595	0.363	0.134	2.35e-49	CM_4	Iqsec1
Nrtn	2.09e-53	0.277088	0.128	0.022	6.97e-49	CM_4	Nrtn
Ror1.3	3.49e-53	1.09876	0.759	0.544	1.16e-48	CM_4	Ror1
Cyfip2.1	7.47e-53	-0.992634	0.193	0.568	2.5e-48	CM_4	Cyfip2
Cpeb3.2	1.33e-52	-0.745882	0.83	0.933	4.43e-48	CM_4	Cpeb3
Neb	2.2e-52	0.808491	0.413	0.164	7.37e-48	CM_4	Neb
Sema6d	2.56e-52	0.959737	0.358	0.135	8.55e-48	CM_4	Sema6d
Cd36.1	2.73e-52	-0.836332	0.755	0.902	9.12e-48	CM_4	Cd36
Phldb1.3	1.15e-51	-1.08108	0.042	0.392	3.83e-47	CM_4	Phldb1
Vldlr.1	2.11e-51	-1.00389	0.262	0.617	7.05e-47	CM_4	Vldlr
Sorbs1.2	6.84e-51	-0.540903	0.964	0.971	2.29e-46	CM_4	Sorbs1
Slc36a2	7.46e-51	0.755644	0.518	0.25	2.49e-46	CM_4	Slc36a2
Pfkfb1	7.54e-51	-1.18609	0.099	0.453	2.52e-46	CM_4	Pfkfb1
Kif26b	1.43e-50	1.61012	0.486	0.239	4.78e-46	CM_4	Kif26b
Cnksr3	1.69e-50	-1.00166	0.149	0.508	5.64e-46	CM_4	Cnksr3
Platr25	3.17e-50	0.255692	0.111	0.018	1.06e-45	CM_4	Platr25
Gipc2	4.25e-50	-0.991047	0.092	0.445	1.42e-45	CM_4	Gipc2
Lrrc2	7.07e-50	-1.03151	0.453	0.743	2.36e-45	CM_4	Lrrc2
Fgf13.2	2.49e-49	-0.675889	0.92	0.954	8.32e-45	CM_4	Fgf13
Gm4117	4.13e-49	0.38127	0.109	0.018	1.38e-44	CM_4	Gm4117
Kif1b	4.75e-49	-0.836663	0.549	0.802	1.59e-44	CM_4	Kif1b
Zfp521	1.74e-48	0.867078	0.816	0.642	5.81e-44	CM_4	Zfp521
Kctd8	3.99e-48	1.11864	0.333	0.122	1.33e-43	CM_4	Kctd8
Tlr4.1	6.59e-48	-1.11675	0.189	0.549	2.2e-43	CM_4	Tlr4
Dtnb	6.87e-48	0.503298	0.245	0.073	2.29e-43	CM_4	Dtnb
Ldb3.1	1.41e-47	-0.55491	0.925	0.966	4.73e-43	CM_4	Ldb3
1010001N08Rik	1.66e-47	-0.926629	0.124	0.488	5.55e-43	CM_4	1010001N08Rik
Nav2.2	2.59e-47	0.684734	0.948	0.887	8.66e-43	CM_4	Nav2
Jazf1	1.69e-46	0.790009	0.394	0.164	5.65e-42	CM_4	Jazf1
Ccnjl	8.9e-46	0.588176	0.237	0.071	2.97e-41	CM_4	Ccnjl
Myl1	1.36e-45	0.364725	0.17	0.04	4.56e-41	CM_4	Myl1
Lmo7	1.63e-45	-0.563632	0.91	0.954	5.46e-41	CM_4	Lmo7
Arhgef17	3.13e-45	0.619688	0.365	0.144	1.05e-40	CM_4	Arhgef17
Cspg4	1.39e-44	0.337091	0.155	0.035	4.66e-40	CM_4	Cspg4
Arhgef28	2.63e-44	0.553629	0.222	0.065	8.78e-40	CM_4	Arhgef28
Mtss1.1	4.14e-44	0.846673	0.677	0.447	1.38e-39	CM_4	Mtss1
Nrg2	4.82e-44	0.478858	0.149	0.033	1.61e-39	CM_4	Nrg2
Scn5a.1	2.1e-43	0.73787	0.899	0.806	7.03e-39	CM_4	Scn5a
Ppara	2.23e-43	-0.80161	0.614	0.822	7.46e-39	CM_4	Ppara
Tbx20.1	2.73e-43	-0.816846	0.164	0.518	9.11e-39	CM_4	Tbx20
Slc6a6.1	4.26e-43	0.927877	0.553	0.3	1.42e-38	CM_4	Slc6a6
Rtn4rl1	1.13e-42	0.566896	0.346	0.134	3.76e-38	CM_4	Rtn4rl1
Gm30624	1.14e-42	0.991404	0.403	0.178	3.82e-38	CM_4	Gm30624
Tcf7l1	1.4e-41	0.801534	0.442	0.208	4.68e-37	CM_4	Tcf7l1
Lrtm1	1.69e-41	-1.17598	0.004	0.29	5.65e-37	CM_4	Lrtm1
Gm4876	2.56e-41	0.527038	0.119	0.024	8.56e-37	CM_4	Gm4876
Sh3gl2	5.33e-41	0.435816	0.166	0.042	1.78e-36	CM_4	Sh3gl2
Tanc2	6.82e-41	0.637921	0.375	0.159	2.28e-36	CM_4	Tanc2
Galm	7.67e-41	-0.844974	0.149	0.471	2.56e-36	CM_4	Galm
Phka2	1e-40	0.82428	0.602	0.371	3.35e-36	CM_4	Phka2
Pdia5	2.7e-40	0.564907	0.306	0.118	9.02e-36	CM_4	Pdia5
Mboat2	5.27e-40	0.747525	0.419	0.196	1.76e-35	CM_4	Mboat2
Snap91	5.51e-40	0.800724	0.415	0.197	1.84e-35	CM_4	Snap91
Hdac9.2	6.32e-40	0.81505	0.828	0.689	2.11e-35	CM_4	Hdac9
Rgl1	1.03e-39	0.741796	0.564	0.334	3.45e-35	CM_4	Rgl1
Tbx5	1.06e-39	0.875754	0.589	0.371	3.55e-35	CM_4	Tbx5
Gata6	1.27e-39	-0.817055	0.182	0.507	4.23e-35	CM_4	Gata6
Fam81a	2.14e-39	0.283628	0.105	0.019	7.16e-35	CM_4	Fam81a
Hcn4	1.42e-38	0.278428	0.113	0.023	4.73e-34	CM_4	Hcn4
Cxxc4	2.49e-38	0.321986	0.14	0.033	8.34e-34	CM_4	Cxxc4
Cacnb2	6.22e-38	-0.550647	0.878	0.952	2.08e-33	CM_4	Cacnb2
Dock4.1	6.41e-38	-0.886462	0.166	0.481	2.14e-33	CM_4	Dock4
Hk2.1	8.11e-38	-0.804573	0.436	0.719	2.71e-33	CM_4	Hk2
Ripor2.1	1.63e-37	-1.00049	0.218	0.523	5.46e-33	CM_4	Ripor2
Fbln1	1.68e-37	0.462072	0.159	0.042	5.6e-33	CM_4	Fbln1
Gm49334	2.24e-37	0.682794	0.354	0.157	7.5e-33	CM_4	Gm49334
Stox2	2.49e-37	0.88218	0.79	0.607	8.32e-33	CM_4	Stox2
Ogdh.1	3.65e-37	-0.67205	0.732	0.869	1.22e-32	CM_4	Ogdh
Itga9	3.84e-37	-0.814401	0.086	0.375	1.28e-32	CM_4	Itga9
Hdac4	8.98e-37	-0.738667	0.384	0.676	3e-32	CM_4	Hdac4
D830005E20Rik.2	1.1e-36	-0.92677	0.612	0.747	3.67e-32	CM_4	D830005E20Rik
Svil	1.83e-36	-0.572304	0.778	0.892	6.11e-32	CM_4	Svil
Cpeb2.1	1.99e-36	0.744999	0.627	0.415	6.66e-32	CM_4	Cpeb2
Ttc12	2.07e-36	0.779657	0.522	0.3	6.91e-32	CM_4	Ttc12
Wls	2.65e-36	0.711542	0.621	0.386	8.84e-32	CM_4	Wls
Peg3	2.87e-36	0.259952	0.105	0.021	9.59e-32	CM_4	Peg3
Vwa8.2	3.15e-36	-0.754838	0.675	0.832	1.05e-31	CM_4	Vwa8
Slc4a3.3	4.04e-36	-0.787196	0.291	0.594	1.35e-31	CM_4	Slc4a3
Mlip.2	1.39e-35	-0.524308	0.922	0.94	4.63e-31	CM_4	Mlip
Mtcl1	2.27e-35	0.419342	0.199	0.062	7.6e-31	CM_4	Mtcl1
Asb14	2.32e-35	-0.68534	0.486	0.742	7.75e-31	CM_4	Asb14
Ttn.2	4.34e-35	-0.424799	0.99	0.994	1.45e-30	CM_4	Ttn
Gm49390	5.53e-35	-0.739051	0.136	0.437	1.85e-30	CM_4	Gm49390
Cdh2.3	8.96e-35	-0.563303	0.895	0.938	2.99e-30	CM_4	Cdh2
Dlg2	1.45e-34	0.791777	0.184	0.055	4.86e-30	CM_4	Dlg2
Gm36975.1	2.93e-34	0.98233	0.356	0.172	9.81e-30	CM_4	Gm36975
Nrp1	3.93e-34	-0.734632	0.543	0.779	1.31e-29	CM_4	Nrp1
Baiap2l1	4.35e-34	0.742655	0.629	0.415	1.45e-29	CM_4	Baiap2l1
Mir100hg.1	5.81e-34	1.14808	0.507	0.316	1.94e-29	CM_4	Mir100hg
Ramp1	1.08e-33	0.26886	0.119	0.027	3.62e-29	CM_4	Ramp1
Adamts9	1.1e-33	0.534982	0.266	0.1	3.69e-29	CM_4	Adamts9
Farp1	1.38e-33	0.612683	0.296	0.121	4.63e-29	CM_4	Farp1
Bcl11b	3.04e-33	0.301439	0.107	0.023	1.02e-28	CM_4	Bcl11b
Wnt5b.1	3.23e-33	-0.885587	0.036	0.287	1.08e-28	CM_4	Wnt5b
Gm36372	4.12e-33	-0.737326	0.18	0.472	1.38e-28	CM_4	Gm36372
Fgfr1	7.37e-33	0.473809	0.208	0.07	2.46e-28	CM_4	Fgfr1
Myh6.1	8.59e-33	-0.383372	0.969	0.984	2.87e-28	CM_4	Myh6
Ppp1r3b	1.01e-32	0.690676	0.363	0.174	3.38e-28	CM_4	Ppp1r3b
Insr	1.31e-32	-0.557844	0.784	0.877	4.38e-28	CM_4	Insr
Hk1	1.43e-32	0.674874	0.547	0.335	4.77e-28	CM_4	Hk1
Dmpk.3	2.57e-32	-0.80768	0.503	0.731	8.58e-28	CM_4	Dmpk
Ezr	3.29e-32	0.528116	0.224	0.08	1.1e-27	CM_4	Ezr
Itgb5	3.59e-32	0.709782	0.526	0.317	1.2e-27	CM_4	Itgb5
Nova1	3.96e-32	0.28548	0.134	0.034	1.32e-27	CM_4	Nova1
Fbxw7.1	4.05e-32	-0.729243	0.361	0.644	1.35e-27	CM_4	Fbxw7
Acacb.1	4.37e-32	-0.613946	0.732	0.868	1.46e-27	CM_4	Acacb
Mpp6	6.5e-32	-0.655325	0.05	0.306	2.17e-27	CM_4	Mpp6
Tnk2	7.05e-32	0.336752	0.151	0.042	2.35e-27	CM_4	Tnk2
Gm36827.1	1.16e-31	-0.815878	0.111	0.389	3.87e-27	CM_4	Gm36827
Tmem196	1.37e-31	0.510544	0.231	0.084	4.57e-27	CM_4	Tmem196
Grk3	1.48e-31	0.440898	0.245	0.092	4.94e-27	CM_4	Grk3
Ralgapa2.2	2.77e-31	-0.494727	0.862	0.926	9.26e-27	CM_4	Ralgapa2
Shld1.2	3.94e-31	-1.03542	0.245	0.505	1.32e-26	CM_4	Shld1
Ctla4	6.06e-31	-0.687387	0.034	0.277	2.03e-26	CM_4	Ctla4
Sv2a	9.18e-31	0.331398	0.13	0.034	3.07e-26	CM_4	Sv2a
Cdk17	1.06e-30	0.592176	0.363	0.175	3.53e-26	CM_4	Cdk17
Slk	1.09e-30	-0.661452	0.539	0.744	3.66e-26	CM_4	Slk
Actn4	1.3e-30	0.609198	0.459	0.252	4.33e-26	CM_4	Actn4
Hecw2	1.9e-30	0.757791	0.642	0.454	6.35e-26	CM_4	Hecw2
Gm12295.1	1.94e-30	1.12197	0.744	0.617	6.49e-26	CM_4	Gm12295
Col4a1	3.25e-30	0.32386	0.147	0.041	1.09e-25	CM_4	Col4a1
Cacna2d1.2	3.28e-30	-0.56729	0.788	0.895	1.1e-25	CM_4	Cacna2d1
Rfx3	7.74e-30	0.609032	0.348	0.165	2.59e-25	CM_4	Rfx3
Appl2.1	1.36e-29	-0.573187	0.264	0.54	4.54e-25	CM_4	Appl2
Grb14.2	1.36e-29	-0.715192	0.648	0.79	4.56e-25	CM_4	Grb14
Luc7l2.1	2.1e-29	-0.463457	0.904	0.941	7.01e-25	CM_4	Luc7l2
Gm20757	2.3e-29	-0.831301	0.214	0.476	7.67e-25	CM_4	Gm20757
Parm1	6.12e-29	0.794467	0.618	0.424	2.05e-24	CM_4	Parm1
Gm48742	1.47e-28	0.370159	0.164	0.051	4.93e-24	CM_4	Gm48742
Ppm1e.1	1.51e-28	0.771868	0.532	0.332	5.03e-24	CM_4	Ppm1e
Whrn	1.69e-28	0.608063	0.39	0.204	5.65e-24	CM_4	Whrn
Oxr1.1	2.5e-28	0.715009	0.453	0.262	8.35e-24	CM_4	Oxr1
Arhgap6.1	2.59e-28	0.809684	0.73	0.569	8.65e-24	CM_4	Arhgap6
Slc20a2	3.46e-28	-0.648086	0.373	0.624	1.16e-23	CM_4	Slc20a2
Pdgfc	4.36e-28	0.518722	0.245	0.097	1.46e-23	CM_4	Pdgfc
Adamts17	5.54e-28	0.50467	0.226	0.088	1.85e-23	CM_4	Adamts17
Phlda1	5.75e-28	0.438647	0.21	0.076	1.92e-23	CM_4	Phlda1
Tmem56	8.85e-28	0.315969	0.168	0.054	2.96e-23	CM_4	Tmem56
Gna12	9.81e-28	-0.677289	0.189	0.444	3.28e-23	CM_4	Gna12
Snd1	1.25e-27	-0.711216	0.358	0.592	4.18e-23	CM_4	Snd1
Gck.2	1.75e-27	-0.69533	0.002	0.205	5.86e-23	CM_4	Gck
Tsc22d3.1	1.79e-27	1.0373	0.522	0.34	5.99e-23	CM_4	Tsc22d3
Arl5a	2.74e-27	0.464687	0.266	0.114	9.17e-23	CM_4	Arl5a
Dab2ip	2.88e-27	0.548533	0.382	0.198	9.62e-23	CM_4	Dab2ip
Abcc8.1	2.91e-27	-0.634527	0.082	0.32	9.74e-23	CM_4	Abcc8
Acadm.1	4.04e-27	-0.735216	0.344	0.584	1.35e-22	CM_4	Acadm
Fgf1.2	4.5e-27	0.535204	0.904	0.838	1.5e-22	CM_4	Fgf1
Rcan2.2	5.73e-27	-0.411058	0.948	0.952	1.92e-22	CM_4	Rcan2
Dlc1.3	6.73e-27	0.44581	0.964	0.925	2.25e-22	CM_4	Dlc1
Mtus2	6.84e-27	-0.621463	0.398	0.645	2.29e-22	CM_4	Mtus2
Atrnl1	7.21e-27	0.738715	0.711	0.567	2.41e-22	CM_4	Atrnl1
Larp1b	8.07e-27	-0.597547	0.556	0.754	2.7e-22	CM_4	Larp1b
Myo5b	9e-27	-0.601464	0.096	0.34	3.01e-22	CM_4	Myo5b
Gm50020	1.31e-26	0.706227	0.21	0.08	4.39e-22	CM_4	Gm50020
Fblim1.1	1.61e-26	-0.577847	0.4	0.661	5.39e-22	CM_4	Fblim1
Mxd4	2.48e-26	0.448617	0.268	0.115	8.28e-22	CM_4	Mxd4
Gm32027	2.63e-26	-0.717209	0.187	0.438	8.79e-22	CM_4	Gm32027
Micall1	3.57e-26	0.690145	0.541	0.371	1.19e-21	CM_4	Micall1
Map3k5	3.6e-26	-0.579993	0.543	0.738	1.2e-21	CM_4	Map3k5
Tnfaip8	4.37e-26	-0.692057	0.428	0.654	1.46e-21	CM_4	Tnfaip8
Hand2os1	5.98e-26	-0.726934	0.329	0.567	2e-21	CM_4	Hand2os1
Smad7	6.43e-26	0.478115	0.197	0.073	2.15e-21	CM_4	Smad7
Bri3	6.93e-26	0.557708	0.495	0.301	2.32e-21	CM_4	Bri3
Jph2.1	6.94e-26	-0.518606	0.709	0.844	2.32e-21	CM_4	Jph2
Agtr1a	7.49e-26	-0.637372	0.237	0.487	2.5e-21	CM_4	Agtr1a
Adcy5	7.92e-26	0.602003	0.428	0.246	2.65e-21	CM_4	Adcy5
Phkg1	9.26e-26	0.62841	0.585	0.397	3.09e-21	CM_4	Phkg1
Adam19.1	1.13e-25	0.508668	0.294	0.134	3.77e-21	CM_4	Adam19
Kmt5a	1.15e-25	-0.671048	0.164	0.399	3.83e-21	CM_4	Kmt5a
Hopx	1.18e-25	0.607832	0.585	0.393	3.94e-21	CM_4	Hopx
Slc12a7.1	1.62e-25	-0.663273	0.329	0.561	5.41e-21	CM_4	Slc12a7
Klhl13	2.23e-25	0.415982	0.229	0.092	7.46e-21	CM_4	Klhl13
Gm26911	2.67e-25	0.382616	0.161	0.054	8.92e-21	CM_4	Gm26911
Lgals4.3	2.94e-25	-0.715581	0.294	0.541	9.82e-21	CM_4	Lgals4
Slc38a3.2	3.68e-25	-0.618816	0.14	0.382	1.23e-20	CM_4	Slc38a3
Apbb2	4.68e-25	0.567509	0.786	0.655	1.56e-20	CM_4	Apbb2
Znrf1	7.72e-25	-0.591616	0.388	0.623	2.58e-20	CM_4	Znrf1
Khdrbs3	9.35e-25	0.693947	0.602	0.434	3.12e-20	CM_4	Khdrbs3
Yap1	9.58e-25	0.638844	0.648	0.5	3.2e-20	CM_4	Yap1
Sox6.3	9.68e-25	-0.415783	0.881	0.928	3.24e-20	CM_4	Sox6
Gm49164	1.17e-24	0.751174	0.325	0.161	3.92e-20	CM_4	Gm49164
Ucp3.1	1.51e-24	-0.595615	0.084	0.309	5.06e-20	CM_4	Ucp3
Pld1	1.59e-24	0.569666	0.363	0.194	5.33e-20	CM_4	Pld1
Homer1.1	2.05e-24	0.603164	0.629	0.485	6.84e-20	CM_4	Homer1
Gm13481.1	2.29e-24	-0.927269	0.287	0.525	7.64e-20	CM_4	Gm13481
Adhfe1	2.99e-24	-0.589135	0.216	0.458	9.98e-20	CM_4	Adhfe1
Ndrg4.2	2.99e-24	0.511681	0.574	0.371	1e-19	CM_4	Ndrg4
Gm43948	3.01e-24	0.406662	0.168	0.059	1.01e-19	CM_4	Gm43948
Magi2.2	3.07e-24	0.400822	0.973	0.953	1.02e-19	CM_4	Magi2
Gm49708.2	3.9e-24	-0.703771	0.428	0.631	1.3e-19	CM_4	Gm49708
Rasal2.1	4.83e-24	0.625744	0.742	0.594	1.61e-19	CM_4	Rasal2
Atp8a2	7.99e-24	0.623208	0.426	0.247	2.67e-19	CM_4	Atp8a2
Trdn.1	8.38e-24	-0.404566	0.948	0.954	2.8e-19	CM_4	Trdn
Gm5532	8.75e-24	-0.630734	0.103	0.328	2.93e-19	CM_4	Gm5532
Ank3	1.34e-23	0.794927	0.966	0.934	4.48e-19	CM_4	Ank3
Astn2.2	2.27e-23	-0.723786	0.01	0.191	7.6e-19	CM_4	Astn2
Bdnf	2.76e-23	-0.584916	0.019	0.204	9.21e-19	CM_4	Bdnf
Dmd.2	3.21e-23	-0.307129	0.96	0.964	1.07e-18	CM_4	Dmd
Myh10	3.64e-23	0.463488	0.298	0.147	1.22e-18	CM_4	Myh10
Lrrn2	3.65e-23	0.275521	0.128	0.039	1.22e-18	CM_4	Lrrn2
Ghr.2	9.64e-23	-0.409271	0.87	0.93	3.22e-18	CM_4	Ghr
Trabd2b.2	9.94e-23	0.519259	0.889	0.793	3.32e-18	CM_4	Trabd2b
Chpt1	1.13e-22	-0.590651	0.591	0.741	3.77e-18	CM_4	Chpt1
Fnip2	1.18e-22	-0.660855	0.226	0.461	3.94e-18	CM_4	Fnip2
Pde1c.1	1.39e-22	-0.435055	0.491	0.748	4.63e-18	CM_4	Pde1c
Fstl4	1.44e-22	-0.822954	0.084	0.287	4.81e-18	CM_4	Fstl4
Tspan18	1.79e-22	0.508336	0.159	0.057	5.97e-18	CM_4	Tspan18
Myh7b.1	2.32e-22	-0.622418	0.556	0.73	7.74e-18	CM_4	Myh7b
Irx5	3.03e-22	0.405839	0.235	0.103	1.01e-17	CM_4	Irx5
Itpr1	3.11e-22	0.557281	0.845	0.744	1.04e-17	CM_4	Itpr1
D7Ertd443e	3.22e-22	-0.61909	0.013	0.187	1.08e-17	CM_4	D7Ertd443e
Tmtc1	3.99e-22	0.591184	0.792	0.681	1.33e-17	CM_4	Tmtc1
Tpm1.1	4.01e-22	0.488136	0.931	0.847	1.34e-17	CM_4	Tpm1
Cabcoco1.1	4.07e-22	0.601318	0.541	0.357	1.36e-17	CM_4	Cabcoco1
Actg1.1	5.25e-22	-0.698811	0.252	0.483	1.75e-17	CM_4	Actg1
Adra1a.1	5.54e-22	-0.701046	0.363	0.584	1.85e-17	CM_4	Adra1a
Trim2	6.17e-22	0.494343	0.266	0.127	2.06e-17	CM_4	Trim2
Ski	6.28e-22	0.495293	0.363	0.199	2.1e-17	CM_4	Ski
Sh3bgr.1	6.28e-22	0.641539	0.432	0.266	2.1e-17	CM_4	Sh3bgr
Ogdhl.2	6.97e-22	-0.525622	0.019	0.196	2.33e-17	CM_4	Ogdhl
Stim1	1.06e-21	0.304619	0.145	0.049	3.56e-17	CM_4	Stim1
Grk5.1	1.26e-21	0.673768	0.526	0.343	4.22e-17	CM_4	Grk5
Lifr	1.67e-21	0.572921	0.526	0.357	5.58e-17	CM_4	Lifr
Ednra	1.67e-21	-0.591623	0.197	0.433	5.58e-17	CM_4	Ednra
Carmn	2.01e-21	0.524929	0.382	0.217	6.72e-17	CM_4	Carmn
Tnni3k.1	2.23e-21	-0.360269	0.948	0.951	7.45e-17	CM_4	Tnni3k
Gm31251.1	2.8e-21	-0.629437	0.631	0.756	9.37e-17	CM_4	Gm31251
Peli1	3.49e-21	0.497629	0.273	0.132	1.17e-16	CM_4	Peli1
Gnao1	4.52e-21	0.313901	0.153	0.055	1.51e-16	CM_4	Gnao1
Gpam	4.56e-21	-0.611278	0.285	0.504	1.52e-16	CM_4	Gpam
Ccnd3.2	4.58e-21	0.394885	0.27	0.126	1.53e-16	CM_4	Ccnd3
Spats2l	6.12e-21	0.461571	0.277	0.137	2.05e-16	CM_4	Spats2l
Rbpms	6.28e-21	0.406301	0.925	0.896	2.1e-16	CM_4	Rbpms
Tmem150a.2	6.81e-21	-0.544429	0.075	0.27	2.27e-16	CM_4	Tmem150a
Pde4a.1	8.15e-21	-0.570461	0.254	0.485	2.72e-16	CM_4	Pde4a
Peak1.3	8.32e-21	0.662519	0.677	0.537	2.78e-16	CM_4	Peak1
Ehbp1.3	1.26e-20	0.422592	0.931	0.911	4.21e-16	CM_4	Ehbp1
Mylk3	1.39e-20	0.445143	0.891	0.818	4.64e-16	CM_4	Mylk3
Trim54.1	1.68e-20	-0.561031	0.39	0.593	5.62e-16	CM_4	Trim54
Synpo.1	1.71e-20	-0.501829	0.103	0.306	5.73e-16	CM_4	Synpo
Nectin3	2.11e-20	0.320174	0.208	0.088	7.07e-16	CM_4	Nectin3
Son.2	2.13e-20	-0.514822	0.813	0.895	7.13e-16	CM_4	Son
Acox1	2.24e-20	-0.586942	0.44	0.632	7.49e-16	CM_4	Acox1
Kif13a	2.67e-20	0.476878	0.843	0.748	8.93e-16	CM_4	Kif13a
Zkscan3	3.2e-20	-0.581502	0.39	0.594	1.07e-15	CM_4	Zkscan3
Ktn1	3.43e-20	-0.46847	0.732	0.849	1.14e-15	CM_4	Ktn1
Ckmt2	4.63e-20	-0.494956	0.763	0.855	1.55e-15	CM_4	Ckmt2
Golga4	4.7e-20	-0.57277	0.459	0.635	1.57e-15	CM_4	Golga4
Fam214a	5.99e-20	-0.530849	0.423	0.641	2e-15	CM_4	Fam214a
Thrb.1	9.05e-20	-0.39871	0.832	0.913	3.03e-15	CM_4	Thrb
Aldh6a1	1.04e-19	-0.536233	0.168	0.374	3.49e-15	CM_4	Aldh6a1
Acss3	1.2e-19	0.310171	0.159	0.06	4e-15	CM_4	Acss3
Sbk1.1	1.53e-19	-0.576543	0.432	0.628	5.1e-15	CM_4	Sbk1
Rasgrp3	1.84e-19	0.315666	0.113	0.036	6.14e-15	CM_4	Rasgrp3
Plscr2.1	1.93e-19	-0.557156	0.377	0.588	6.46e-15	CM_4	Plscr2
Srrm4	1.97e-19	-0.48417	0.059	0.239	6.58e-15	CM_4	Srrm4
Adamtsl5.1	2.05e-19	-0.510812	0.273	0.494	6.84e-15	CM_4	Adamtsl5
Pfkp	2.15e-19	0.409681	0.312	0.164	7.19e-15	CM_4	Pfkp
Herc3	2.48e-19	0.543441	0.503	0.347	8.29e-15	CM_4	Herc3
Zfp445	2.71e-19	-0.529593	0.468	0.636	9.05e-15	CM_4	Zfp445
Ppargc1b	3.36e-19	-0.44051	0.721	0.832	1.12e-14	CM_4	Ppargc1b
Tent5a	3.98e-19	0.298711	0.124	0.041	1.33e-14	CM_4	Tent5a
Itgb6.2	4.02e-19	-0.507596	0.484	0.685	1.34e-14	CM_4	Itgb6
Twf2	4.55e-19	-0.598592	0.157	0.357	1.52e-14	CM_4	Twf2
Mir99ahg.2	4.95e-19	-0.667727	0.671	0.743	1.66e-14	CM_4	Mir99ahg
Ddx5.2	5.08e-19	-0.567859	0.656	0.81	1.7e-14	CM_4	Ddx5
Rap1gap.1	5.35e-19	0.395521	0.294	0.152	1.79e-14	CM_4	Rap1gap
Phf21a.1	5.38e-19	0.549709	0.69	0.55	1.8e-14	CM_4	Phf21a
Optn	5.98e-19	-0.511925	0.174	0.378	2e-14	CM_4	Optn
Chrm2	8.33e-19	0.509311	0.939	0.902	2.78e-14	CM_4	Chrm2
Gramd1b.1	1.04e-18	0.51762	0.868	0.801	3.48e-14	CM_4	Gramd1b
Gm24474.1	1.3e-18	0.762875	0.658	0.545	4.35e-14	CM_4	Gm24474
Obscn.1	1.57e-18	-0.366927	0.876	0.915	5.24e-14	CM_4	Obscn
Palld	2.09e-18	-0.308228	0.969	0.974	6.99e-14	CM_4	Palld
Iqgap1	3.03e-18	0.541137	0.577	0.428	1.01e-13	CM_4	Iqgap1
Gpat3	3.95e-18	-0.46346	0.117	0.307	1.32e-13	CM_4	Gpat3
Gja1	4.17e-18	-0.521429	0.426	0.63	1.39e-13	CM_4	Gja1
Rph3al	4.68e-18	0.353102	0.203	0.091	1.56e-13	CM_4	Rph3al
Cavin4	4.83e-18	-0.408743	0.025	0.179	1.61e-13	CM_4	Cavin4
Tef.1	8.02e-18	-0.521407	0.382	0.579	2.68e-13	CM_4	Tef
Etv5	9.61e-18	0.341148	0.184	0.079	3.21e-13	CM_4	Etv5
Sh3d19	1.05e-17	0.536031	0.147	0.057	3.5e-13	CM_4	Sh3d19
Sdc2	1.06e-17	0.406487	0.229	0.108	3.54e-13	CM_4	Sdc2
Mybpc3.3	1.32e-17	-0.510827	0.736	0.839	4.41e-13	CM_4	Mybpc3
Limch1.1	1.34e-17	-0.322301	0.925	0.941	4.47e-13	CM_4	Limch1
Ush1c	1.35e-17	-0.445757	0	0.134	4.52e-13	CM_4	Ush1c
Srsf2.1	1.42e-17	-0.613984	0.346	0.547	4.74e-13	CM_4	Srsf2
Nptn.1	1.5e-17	0.486165	0.675	0.526	5e-13	CM_4	Nptn
Mef2a.2	1.91e-17	0.380939	0.881	0.793	6.39e-13	CM_4	Mef2a
Disc1	2.13e-17	0.41918	0.287	0.154	7.12e-13	CM_4	Disc1
B4galt1	2.23e-17	0.501844	0.665	0.522	7.46e-13	CM_4	B4galt1
Lnx1	2.41e-17	-0.497176	0.103	0.285	8.06e-13	CM_4	Lnx1
Akap13.1	2.63e-17	0.433876	0.847	0.787	8.78e-13	CM_4	Akap13
Gm17428.2	3.38e-17	-0.581314	0.516	0.71	1.13e-12	CM_4	Gm17428
Ssbp2.1	3.46e-17	0.515265	0.667	0.534	1.16e-12	CM_4	Ssbp2
Glul	4.1e-17	-0.506795	0.075	0.243	1.37e-12	CM_4	Glul
Dgat2.1	5.18e-17	-0.534942	0.252	0.448	1.73e-12	CM_4	Dgat2
Hadha	6.17e-17	-0.520049	0.518	0.687	2.06e-12	CM_4	Hadha
Vcl.1	7.06e-17	-0.457367	0.407	0.599	2.36e-12	CM_4	Vcl
Gm26862	7.64e-17	-0.540065	0.176	0.374	2.55e-12	CM_4	Gm26862
Agrn.3	8.34e-17	-0.491024	0.111	0.288	2.79e-12	CM_4	Agrn
Ank2.1	1.02e-16	-0.315981	0.941	0.963	3.41e-12	CM_4	Ank2
Plce1	1.22e-16	-0.485513	0.367	0.566	4.07e-12	CM_4	Plce1
Pcdh7.3	1.39e-16	0.283592	0.987	0.973	4.63e-12	CM_4	Pcdh7
Fam78a	1.53e-16	0.252852	0.128	0.047	5.12e-12	CM_4	Fam78a
Cp	1.83e-16	-0.528131	0.224	0.43	6.1e-12	CM_4	Cp
Tmod1	1.86e-16	0.409465	0.774	0.675	6.21e-12	CM_4	Tmod1
Tulp4	2.1e-16	0.515571	0.591	0.469	7.03e-12	CM_4	Tulp4
Plxna4	3.85e-16	0.489351	0.702	0.577	1.29e-11	CM_4	Plxna4
2210408F21Rik	4.33e-16	-0.590537	0.468	0.613	1.45e-11	CM_4	2210408F21Rik
Etv6	4.49e-16	0.491901	0.503	0.353	1.5e-11	CM_4	Etv6
Hdgfl3	4.66e-16	0.307382	0.208	0.098	1.56e-11	CM_4	Hdgfl3
Klhl32	5.98e-16	0.459531	0.516	0.364	2e-11	CM_4	Klhl32
Nbea	6.06e-16	0.494996	0.732	0.645	2.02e-11	CM_4	Nbea
Hadhb	6.26e-16	-0.483811	0.472	0.638	2.09e-11	CM_4	Hadhb
Ccnl2.3	6.31e-16	-0.49641	0.417	0.607	2.11e-11	CM_4	Ccnl2
Gm48606.1	7.18e-16	-0.460216	0.084	0.246	2.4e-11	CM_4	Gm48606
2900089D17Rik	7.23e-16	0.50225	0.245	0.13	2.42e-11	CM_4	2900089D17Rik
Fhod3.1	7.47e-16	-0.284166	0.975	0.969	2.5e-11	CM_4	Fhod3
Dip2c.3	8.01e-16	-0.30022	0.866	0.931	2.68e-11	CM_4	Dip2c
Ltbp1	8.35e-16	-0.362725	0.459	0.669	2.79e-11	CM_4	Ltbp1
2310016D03Rik	8.91e-16	0.337345	0.153	0.063	2.98e-11	CM_4	2310016D03Rik
Gm12519	9.13e-16	-0.397888	0.082	0.244	3.05e-11	CM_4	Gm12519
Osbpl8.1	9.71e-16	-0.386449	0.524	0.693	3.24e-11	CM_4	Osbpl8
Bckdha.1	9.72e-16	-0.485495	0.132	0.303	3.25e-11	CM_4	Bckdha
Ints4	1.06e-15	-0.394913	0.069	0.227	3.53e-11	CM_4	Ints4
Pde4b.3	1.51e-15	0.368144	0.975	0.938	5.03e-11	CM_4	Pde4b
Abcb4	1.6e-15	-0.464319	0.136	0.308	5.36e-11	CM_4	Abcb4
Ablim2.1	1.67e-15	0.473839	0.549	0.422	5.58e-11	CM_4	Ablim2
Fbxo40	1.77e-15	-0.475272	0.373	0.553	5.91e-11	CM_4	Fbxo40
Fgfr2.1	1.81e-15	-0.502295	0.662	0.772	6.07e-11	CM_4	Fgfr2
Gm20468	1.84e-15	0.425374	0.273	0.151	6.16e-11	CM_4	Gm20468
Ankrd44	1.98e-15	0.262855	0.182	0.082	6.63e-11	CM_4	Ankrd44
Pmepa1	2.01e-15	0.353111	0.161	0.07	6.72e-11	CM_4	Pmepa1
Dennd5a	2.05e-15	0.454087	0.411	0.272	6.86e-11	CM_4	Dennd5a
Il13ra1	2.31e-15	-0.376441	0.015	0.143	7.7e-11	CM_4	Il13ra1
Trip10.3	2.35e-15	-0.505919	0.124	0.289	7.85e-11	CM_4	Trip10
Iigp1	2.36e-15	-0.473321	0.013	0.141	7.88e-11	CM_4	Iigp1
Rmst	2.65e-15	-0.416726	0.067	0.223	8.87e-11	CM_4	Rmst
Rassf3	2.8e-15	0.401421	0.314	0.183	9.35e-11	CM_4	Rassf3
Lrp1b	2.82e-15	0.322546	0.249	0.128	9.42e-11	CM_4	Lrp1b
Ptprm	3.08e-15	-0.346793	0.864	0.918	1.03e-10	CM_4	Ptprm
Osbp2.1	3.1e-15	-0.453655	0.3	0.483	1.04e-10	CM_4	Osbp2
Bckdhb	3.28e-15	-0.486524	0.275	0.458	1.1e-10	CM_4	Bckdhb
Ankrd50	3.44e-15	0.313226	0.184	0.085	1.15e-10	CM_4	Ankrd50
Cacna1a	3.95e-15	0.315603	0.168	0.074	1.32e-10	CM_4	Cacna1a
Gm16093	4.12e-15	-0.405072	0.027	0.16	1.38e-10	CM_4	Gm16093
Cd28	4.17e-15	-0.390428	0.025	0.158	1.39e-10	CM_4	Cd28
Tgm2	4.34e-15	0.332941	0.245	0.127	1.45e-10	CM_4	Tgm2
Ppargc1a.1	4.86e-15	-0.532967	0.755	0.844	1.62e-10	CM_4	Ppargc1a
Cdh4.2	4.95e-15	-0.606831	0.122	0.284	1.65e-10	CM_4	Cdh4
Egf	5.18e-15	-0.499098	0.061	0.205	1.73e-10	CM_4	Egf
Aco2.1	5.68e-15	-0.423406	0.621	0.76	1.9e-10	CM_4	Aco2
Plbd1	5.83e-15	-0.379393	0.086	0.244	1.95e-10	CM_4	Plbd1
Cntn5	5.85e-15	-0.575535	0.021	0.15	1.96e-10	CM_4	Cntn5
Resf1.2	6.31e-15	-0.754172	0.14	0.302	2.11e-10	CM_4	Resf1
Trim68	8.01e-15	0.323161	0.218	0.111	2.68e-10	CM_4	Trim68
Camta1.1	8.98e-15	-0.406974	0.818	0.873	3e-10	CM_4	Camta1
Ube2b	9.24e-15	-0.549045	0.388	0.544	3.09e-10	CM_4	Ube2b
Atcayos	9.38e-15	-0.573648	0.516	0.647	3.13e-10	CM_4	Atcayos
Acsl1.1	1.15e-14	-0.435689	0.673	0.784	3.86e-10	CM_4	Acsl1
Mtr	1.39e-14	-0.488205	0.222	0.405	4.64e-10	CM_4	Mtr
Palmd	1.52e-14	-0.431658	0.143	0.313	5.08e-10	CM_4	Palmd
Rmnd1.1	1.77e-14	-0.441161	0.176	0.35	5.93e-10	CM_4	Rmnd1
Gne	1.8e-14	0.347949	0.212	0.108	6e-10	CM_4	Gne
Tec	1.87e-14	-0.434202	0.189	0.364	6.27e-10	CM_4	Tec
Cenpf	1.89e-14	0.320035	0.178	0.082	6.32e-10	CM_4	Cenpf
Fndc9	1.9e-14	-0.392687	0.042	0.178	6.35e-10	CM_4	Fndc9
Clpx	1.94e-14	-0.402185	0.279	0.46	6.49e-10	CM_4	Clpx
Lclat1	2.03e-14	-0.473689	0.453	0.625	6.8e-10	CM_4	Lclat1
Crip2.3	2.59e-14	0.390605	0.568	0.425	8.65e-10	CM_4	Crip2
Rps6ka3.1	2.81e-14	0.599323	0.505	0.383	9.38e-10	CM_4	Rps6ka3
Aldh9a1.1	3.18e-14	-0.42262	0.216	0.396	1.06e-09	CM_4	Aldh9a1
Asb2	3.2e-14	-0.450398	0.631	0.756	1.07e-09	CM_4	Asb2
4930567K20Rik.1	3.58e-14	-0.427771	0.044	0.179	1.2e-09	CM_4	4930567K20Rik
Plscr5.1	3.67e-14	-0.347672	0.027	0.153	1.23e-09	CM_4	Plscr5
Fmnl2	3.77e-14	0.533216	0.468	0.333	1.26e-09	CM_4	Fmnl2
Igsf3	3.93e-14	0.267941	0.187	0.089	1.31e-09	CM_4	Igsf3
Ndnf	3.93e-14	0.279209	0.136	0.057	1.31e-09	CM_4	Ndnf
Kif6	4.33e-14	-0.438436	0.119	0.277	1.45e-09	CM_4	Kif6
Gm36235	4.69e-14	-0.404135	0.067	0.21	1.57e-09	CM_4	Gm36235
Prkn.1	4.77e-14	-0.471303	0.623	0.731	1.59e-09	CM_4	Prkn
Btbd11	5.83e-14	0.532042	0.306	0.182	1.95e-09	CM_4	Btbd11
Dhtkd1	6.17e-14	-0.370161	0.117	0.279	2.06e-09	CM_4	Dhtkd1
Zfp536	6.29e-14	-0.379196	0.233	0.416	2.1e-09	CM_4	Zfp536
Fam78b	6.3e-14	0.25268	0.117	0.046	2.11e-09	CM_4	Fam78b
Bdh1	6.72e-14	-0.376625	0.031	0.156	2.25e-09	CM_4	Bdh1
Stk40	6.76e-14	0.366583	0.304	0.179	2.26e-09	CM_4	Stk40
Pfkfb2	7.3e-14	-0.513049	0.252	0.426	2.44e-09	CM_4	Pfkfb2
Pacsin2	8.17e-14	-0.487234	0.476	0.623	2.73e-09	CM_4	Pacsin2
Mlxipl.1	8.32e-14	-0.434791	0.254	0.431	2.78e-09	CM_4	Mlxipl
Ubr3	8.85e-14	-0.386451	0.608	0.754	2.96e-09	CM_4	Ubr3
Abcc9	9.48e-14	-0.351603	0.512	0.709	3.17e-09	CM_4	Abcc9
Daam1	9.59e-14	0.396057	0.801	0.728	3.21e-09	CM_4	Daam1
Fnip1.1	9.66e-14	-0.443288	0.568	0.71	3.23e-09	CM_4	Fnip1
Sybu	1.06e-13	0.282745	0.138	0.059	3.55e-09	CM_4	Sybu
Kcna4	1.13e-13	0.274108	0.143	0.061	3.79e-09	CM_4	Kcna4
Etfdh	1.15e-13	-0.347721	0.302	0.489	3.86e-09	CM_4	Etfdh
Pik3r1	1.31e-13	-0.472234	0.585	0.723	4.38e-09	CM_4	Pik3r1
Mapt.1	1.4e-13	-0.472748	0.344	0.521	4.67e-09	CM_4	Mapt
Pkd2	1.42e-13	0.379227	0.256	0.142	4.76e-09	CM_4	Pkd2
Ckm.2	1.42e-13	-0.609453	0.027	0.147	4.76e-09	CM_4	Ckm
Dram1	1.48e-13	-0.427988	0.059	0.193	4.93e-09	CM_4	Dram1
Ppfia1	1.59e-13	-0.438698	0.39	0.567	5.3e-09	CM_4	Ppfia1
Rps6ka2.1	1.68e-13	-0.427759	0.212	0.384	5.63e-09	CM_4	Rps6ka2
Tango2	1.74e-13	-0.42707	0.501	0.66	5.8e-09	CM_4	Tango2
Arsb	1.77e-13	0.253368	0.113	0.044	5.9e-09	CM_4	Arsb
Cers4	1.77e-13	0.450451	0.53	0.401	5.91e-09	CM_4	Cers4
Slc35f1	2.33e-13	0.441811	0.113	0.044	7.78e-09	CM_4	Slc35f1
Sh2d4a	2.45e-13	-0.344225	0.088	0.236	8.2e-09	CM_4	Sh2d4a
Utrn	2.7e-13	0.414976	0.767	0.697	9.01e-09	CM_4	Utrn
Togaram2	2.71e-13	0.424237	0.159	0.074	9.05e-09	CM_4	Togaram2
Myot	2.78e-13	-0.382433	0.019	0.133	9.31e-09	CM_4	Myot
Tshz1	2.89e-13	0.542319	0.568	0.442	9.67e-09	CM_4	Tshz1
Mid2	2.97e-13	0.585402	0.474	0.359	9.93e-09	CM_4	Mid2
Gm36670	3.16e-13	0.365764	0.268	0.155	1.06e-08	CM_4	Gm36670
Sipa1l2	3.4e-13	0.383406	0.566	0.446	1.14e-08	CM_4	Sipa1l2
Gm7854	3.43e-13	0.259026	0.103	0.038	1.15e-08	CM_4	Gm7854
Cpeb1	3.52e-13	-0.447796	0.287	0.46	1.18e-08	CM_4	Cpeb1
Pcx	3.77e-13	-0.387787	0.101	0.246	1.26e-08	CM_4	Pcx
Lrmda.2	3.79e-13	-0.686554	0.151	0.306	1.27e-08	CM_4	Lrmda
AC133498.1	3.95e-13	-1.02219	0.046	0.169	1.32e-08	CM_4	AC133498.1
Pkd2l2	4.02e-13	-0.415279	0.296	0.472	1.34e-08	CM_4	Pkd2l2
Secisbp2.1	4.35e-13	-0.360973	0.205	0.377	1.45e-08	CM_4	Secisbp2
Nceh1.1	4.48e-13	-0.43368	0.419	0.58	1.5e-08	CM_4	Nceh1
Bcl11a	4.84e-13	-0.416882	0.084	0.223	1.62e-08	CM_4	Bcl11a
Dbp.2	5.62e-13	-0.521517	0.159	0.313	1.88e-08	CM_4	Dbp
Hspb8	5.88e-13	-0.359136	0.094	0.24	1.96e-08	CM_4	Hspb8
Ctnnal1	6.38e-13	0.372808	0.342	0.216	2.13e-08	CM_4	Ctnnal1
Mast2.1	6.42e-13	0.331872	0.922	0.898	2.14e-08	CM_4	Mast2
Synpo2	6.8e-13	-0.357232	0.792	0.866	2.27e-08	CM_4	Synpo2
Mir133a-1hg	7.31e-13	-0.415134	0.35	0.524	2.44e-08	CM_4	Mir133a-1hg
Cux2.1	7.87e-13	0.444097	0.587	0.463	2.63e-08	CM_4	Cux2
Cep85l.1	8.27e-13	0.715535	0.43	0.32	2.76e-08	CM_4	Cep85l
Flvcr2	9.12e-13	-0.349994	0.042	0.161	3.05e-08	CM_4	Flvcr2
Lgr6.1	9.46e-13	-0.436043	0.342	0.51	3.16e-08	CM_4	Lgr6
Maml3	9.67e-13	0.406062	0.734	0.633	3.23e-08	CM_4	Maml3
Strip2	9.96e-13	-0.406686	0.499	0.637	3.33e-08	CM_4	Strip2
Prepl	1.03e-12	-0.361923	0.157	0.316	3.44e-08	CM_4	Prepl
Art3.2	1.05e-12	0.369626	0.719	0.63	3.51e-08	CM_4	Art3
Epha4.1	1.06e-12	-0.42099	0.264	0.442	3.55e-08	CM_4	Epha4
Setbp1.2	1.09e-12	-0.392569	0.727	0.806	3.63e-08	CM_4	Setbp1
Rin2	1.1e-12	0.348313	0.224	0.121	3.69e-08	CM_4	Rin2
Dach1.2	1.1e-12	0.475747	0.233	0.126	3.69e-08	CM_4	Dach1
Cecr2	1.2e-12	-0.39047	0.34	0.511	4e-08	CM_4	Cecr2
Fndc3b	1.23e-12	0.341954	0.79	0.699	4.11e-08	CM_4	Fndc3b
Rapgef2	1.4e-12	0.458115	0.677	0.599	4.67e-08	CM_4	Rapgef2
Igf2bp2	1.44e-12	0.286047	0.22	0.117	4.82e-08	CM_4	Igf2bp2
Rubcn	1.49e-12	-0.373474	0.224	0.39	4.96e-08	CM_4	Rubcn
Kcnd3	1.52e-12	-0.372128	0.646	0.767	5.1e-08	CM_4	Kcnd3
Parvb	1.87e-12	0.412243	0.371	0.251	6.23e-08	CM_4	Parvb
Sacs	1.93e-12	0.387777	0.618	0.512	6.44e-08	CM_4	Sacs
Enox1	2.01e-12	0.309446	0.103	0.04	6.73e-08	CM_4	Enox1
Gm42418.4	2.08e-12	0.49562	0.656	0.476	6.94e-08	CM_4	Gm42418
Mpc1	2.13e-12	-0.421303	0.648	0.762	7.13e-08	CM_4	Mpc1
Cd47	2.32e-12	0.359771	0.298	0.182	7.74e-08	CM_4	Cd47
Cpt1b.3	2.37e-12	-0.522612	0.287	0.451	7.92e-08	CM_4	Cpt1b
BC005537.1	3.04e-12	-0.425475	0.283	0.45	1.02e-07	CM_4	BC005537
Dock5	3.52e-12	-0.34316	0.078	0.209	1.18e-07	CM_4	Dock5
Gm16685	3.93e-12	-0.39207	0.025	0.136	1.31e-07	CM_4	Gm16685
Kcnq4	3.98e-12	-0.295419	0.01	0.111	1.33e-07	CM_4	Kcnq4
Srgap2	4e-12	0.480966	0.396	0.276	1.34e-07	CM_4	Srgap2
Auts2	4.38e-12	-0.297192	0.834	0.913	1.47e-07	CM_4	Auts2
Gm31600	4.46e-12	-0.2799	0.021	0.128	1.49e-07	CM_4	Gm31600
Cab39l	5.06e-12	0.404164	0.3	0.188	1.69e-07	CM_4	Cab39l
Intu	5.6e-12	-0.423908	0.365	0.512	1.87e-07	CM_4	Intu
Slc47a1	5.67e-12	0.334899	0.468	0.335	1.89e-07	CM_4	Slc47a1
Susd6.1	6.57e-12	0.384334	0.69	0.598	2.2e-07	CM_4	Susd6
Ndst1	6.75e-12	-0.330578	0.094	0.233	2.26e-07	CM_4	Ndst1
Dcp1b.1	7.13e-12	-0.425053	0.3	0.463	2.38e-07	CM_4	Dcp1b
Lhfp.3	7.15e-12	0.409956	0.66	0.531	2.39e-07	CM_4	Lhfp
Hdac7.1	7.63e-12	0.375049	0.27	0.162	2.55e-07	CM_4	Hdac7
Mhrt.2	7.71e-12	-0.457466	0.646	0.746	2.58e-07	CM_4	Mhrt
Adcy9	7.74e-12	0.436599	0.602	0.499	2.59e-07	CM_4	Adcy9
Kif16b	8.17e-12	-0.379772	0.595	0.716	2.73e-07	CM_4	Kif16b
Afdn	9.01e-12	0.374171	0.499	0.369	3.01e-07	CM_4	Afdn
A230057D06Rik	9.23e-12	0.346617	0.111	0.046	3.09e-07	CM_4	A230057D06Rik
Acp6	9.27e-12	0.305083	0.229	0.128	3.1e-07	CM_4	Acp6
Yipf7	9.53e-12	-0.412639	0.375	0.53	3.19e-07	CM_4	Yipf7
Nnt	1.06e-11	-0.364094	0.122	0.262	3.54e-07	CM_4	Nnt
Coq10b.2	1.07e-11	-0.41263	0.268	0.426	3.57e-07	CM_4	Coq10b
Plod2.1	1.12e-11	-0.388432	0.172	0.324	3.76e-07	CM_4	Plod2
Tmem144	1.23e-11	-0.365268	0.117	0.257	4.1e-07	CM_4	Tmem144
Macrod1.1	1.26e-11	-0.349164	0.568	0.708	4.2e-07	CM_4	Macrod1
Gm17276.1	1.37e-11	-0.409761	0.459	0.603	4.56e-07	CM_4	Gm17276
Lncpint.3	1.42e-11	-0.352084	0.857	0.908	4.75e-07	CM_4	Lncpint
Slc35f5	1.5e-11	-0.393713	0.26	0.413	5.02e-07	CM_4	Slc35f5
Psme4.2	1.59e-11	0.337095	0.939	0.897	5.3e-07	CM_4	Psme4
Osbpl6	1.73e-11	0.450494	0.547	0.44	5.78e-07	CM_4	Osbpl6
Adamts7	1.74e-11	0.301096	0.317	0.201	5.81e-07	CM_4	Adamts7
Myo1e	1.76e-11	0.264285	0.143	0.066	5.89e-07	CM_4	Myo1e
D830032E09Rik.1	1.78e-11	0.381259	0.765	0.692	5.95e-07	CM_4	D830032E09Rik
2610035D17Rik.1	1.8e-11	0.386717	0.39	0.269	6.01e-07	CM_4	2610035D17Rik
Mme	2.05e-11	-0.283627	0.023	0.127	6.84e-07	CM_4	Mme
Gsto1	2.18e-11	-0.291864	0.025	0.129	7.28e-07	CM_4	Gsto1
Caprin1.1	2.3e-11	-0.403343	0.308	0.459	7.68e-07	CM_4	Caprin1
Atad3a.2	2.54e-11	-0.326275	0.174	0.329	8.48e-07	CM_4	Atad3a
4430402I18Rik	2.8e-11	0.420974	0.333	0.225	9.35e-07	CM_4	4430402I18Rik
Camkmt	2.98e-11	-0.418458	0.178	0.321	9.96e-07	CM_4	Camkmt
Idh2.1	3.06e-11	-0.502536	0.417	0.555	1.02e-06	CM_4	Idh2
Tmeff1	3.15e-11	-0.266557	0.021	0.121	1.05e-06	CM_4	Tmeff1
Pdk4	3.22e-11	-0.654121	0.172	0.31	1.08e-06	CM_4	Pdk4
Gm12092	3.24e-11	-0.33968	0.09	0.221	1.08e-06	CM_4	Gm12092
Exoc4.1	3.87e-11	0.375775	0.813	0.729	1.29e-06	CM_4	Exoc4
Cluh.1	4.04e-11	-0.343642	0.291	0.459	1.35e-06	CM_4	Cluh
Arhgap17	4.11e-11	0.317022	0.247	0.148	1.37e-06	CM_4	Arhgap17
Zfp407	4.54e-11	-0.434943	0.476	0.605	1.52e-06	CM_4	Zfp407
Creg1	4.61e-11	-0.261218	0.038	0.148	1.54e-06	CM_4	Creg1
Prickle1	4.65e-11	0.42105	0.696	0.596	1.55e-06	CM_4	Prickle1
Eno3.2	4.99e-11	-0.372506	0.103	0.239	1.67e-06	CM_4	Eno3
Cyth3	5.78e-11	0.439614	0.304	0.2	1.93e-06	CM_4	Cyth3
St6gal1	5.83e-11	-0.297564	0.107	0.242	1.95e-06	CM_4	St6gal1
Ptp4a3.3	6.27e-11	-0.409776	0.124	0.261	2.09e-06	CM_4	Ptp4a3
Acss1	6.66e-11	-0.347871	0.572	0.698	2.23e-06	CM_4	Acss1
Mccc2	6.67e-11	-0.331528	0.229	0.384	2.23e-06	CM_4	Mccc2
Lonp2	7.51e-11	-0.351861	0.503	0.637	2.51e-06	CM_4	Lonp2
Cadm1	7.52e-11	0.335647	0.145	0.07	2.51e-06	CM_4	Cadm1
Lrpprc	8.24e-11	-0.364442	0.373	0.529	2.75e-06	CM_4	Lrpprc
Btrc	9.23e-11	0.354656	0.47	0.349	3.08e-06	CM_4	Btrc
Ehd4	9.29e-11	0.405951	0.696	0.618	3.11e-06	CM_4	Ehd4
Pcca	9.36e-11	-0.352834	0.514	0.638	3.13e-06	CM_4	Pcca
Ankrd28.1	9.46e-11	0.423385	0.566	0.468	3.16e-06	CM_4	Ankrd28
Stxbp4	1.24e-10	0.332288	0.329	0.216	4.15e-06	CM_4	Stxbp4
Ppp2r5a	1.28e-10	-0.306834	0.155	0.302	4.29e-06	CM_4	Ppp2r5a
Ppm1k	1.35e-10	-0.37481	0.176	0.316	4.51e-06	CM_4	Ppm1k
Ppp3ca	1.4e-10	-0.342368	0.499	0.636	4.67e-06	CM_4	Ppp3ca
Nrap.1	1.42e-10	-0.299249	0.602	0.726	4.75e-06	CM_4	Nrap
Ivd.1	1.47e-10	-0.384229	0.275	0.432	4.92e-06	CM_4	Ivd
Mettl9	1.5e-10	-0.315498	0.197	0.346	5.02e-06	CM_4	Mettl9
Irx4.1	1.51e-10	-0.258857	0.057	0.17	5.04e-06	CM_4	Irx4
Slc38a2	1.76e-10	-0.423103	0.394	0.54	5.89e-06	CM_4	Slc38a2
Slc9a7	1.76e-10	0.314264	0.241	0.143	5.89e-06	CM_4	Slc9a7
Art1.2	1.79e-10	-0.339172	0.715	0.839	5.99e-06	CM_4	Art1
Plekhm3	2.01e-10	0.39934	0.413	0.305	6.73e-06	CM_4	Plekhm3
Isoc2a	2.11e-10	-0.301717	0.143	0.279	7.05e-06	CM_4	Isoc2a
Gpatch8	2.13e-10	0.322038	0.801	0.74	7.12e-06	CM_4	Gpatch8
Akap11	2.37e-10	0.41021	0.426	0.323	7.93e-06	CM_4	Akap11
Abcd3	2.56e-10	-0.327913	0.591	0.713	8.57e-06	CM_4	Abcd3
Acad11	2.57e-10	-0.374868	0.205	0.342	8.58e-06	CM_4	Acad11
Epb41	2.8e-10	-0.303702	0.7	0.794	9.37e-06	CM_4	Epb41
Comt	2.95e-10	-0.34282	0.325	0.482	9.85e-06	CM_4	Comt
Ogt	3.14e-10	0.354949	0.704	0.623	1.05e-05	CM_4	Ogt
Pde11a	3.16e-10	-0.338822	0.015	0.102	1.06e-05	CM_4	Pde11a
Msh3	3.17e-10	-0.298831	0.189	0.335	1.06e-05	CM_4	Msh3
Macf1.2	3.38e-10	0.250632	0.918	0.895	1.13e-05	CM_4	Macf1
Qk.3	3.42e-10	-0.280683	0.916	0.926	1.14e-05	CM_4	Qk
Nfe2l2	3.53e-10	-0.324596	0.26	0.414	1.18e-05	CM_4	Nfe2l2
Csf1	3.54e-10	-0.304048	0.063	0.174	1.18e-05	CM_4	Csf1
Dbt	3.7e-10	-0.289623	0.088	0.207	1.24e-05	CM_4	Dbt
Inpp4b.2	3.74e-10	-0.307468	0.734	0.809	1.25e-05	CM_4	Inpp4b
Nqo1	3.82e-10	-0.298646	0.042	0.143	1.28e-05	CM_4	Nqo1
Cat	3.85e-10	-0.311454	0.18	0.326	1.29e-05	CM_4	Cat
Map4	3.9e-10	-0.309158	0.786	0.85	1.3e-05	CM_4	Map4
Myo5c.1	4.26e-10	-0.27746	0.195	0.342	1.42e-05	CM_4	Myo5c
Hspb7.1	4.32e-10	-0.39537	0.155	0.291	1.44e-05	CM_4	Hspb7
Smtn.2	4.41e-10	-0.333607	0.7	0.814	1.47e-05	CM_4	Smtn
Slc25a34	4.55e-10	-0.282428	0.117	0.243	1.52e-05	CM_4	Slc25a34
Luzp1.1	4.76e-10	0.387383	0.409	0.292	1.59e-05	CM_4	Luzp1
Erc2	5.28e-10	0.462571	0.3	0.196	1.77e-05	CM_4	Erc2
Dst.1	5.85e-10	-0.278309	0.925	0.928	1.95e-05	CM_4	Dst
Dleu2.1	6.11e-10	-0.446828	0.35	0.491	2.04e-05	CM_4	Dleu2
Cap2	6.53e-10	0.364835	0.761	0.701	2.18e-05	CM_4	Cap2
Ifrd1	6.74e-10	-0.374382	0.493	0.631	2.25e-05	CM_4	Ifrd1
Lpgat1	7.45e-10	0.335663	0.6	0.496	2.49e-05	CM_4	Lpgat1
Hibadh	7.81e-10	-0.374897	0.4	0.547	2.61e-05	CM_4	Hibadh
[truncated: 322 more rows]

## Sheet: all.markers_FB
	p_val	avg_log2FC	pct.1	pct.2	p_val_adj	cluster	gene
Qk	6.86e-163	0.575673	0.381	0.163	2.29e-158	FB_0	Qk
Pcdh7	4.51e-157	0.904075	0.239	0.077	1.51e-152	FB_0	Pcdh7
Ablim1	1.81e-143	0.616976	0.331	0.142	6.04e-139	FB_0	Ablim1
Gm42418	1.69e-114	-0.785143	0.696	0.826	5.65e-110	FB_0	Gm42418
Pla1a	5.79e-107	0.50313	0.294	0.137	1.94e-102	FB_0	Pla1a
Mfap5	4.73e-106	0.565135	0.389	0.212	1.58e-101	FB_0	Mfap5
Prkca	8.93e-99	0.448728	0.521	0.32	2.98e-94	FB_0	Prkca
Slco3a1	2.4e-97	0.494491	0.377	0.207	8.01e-93	FB_0	Slco3a1
Pcsk6	1.86e-96	0.463631	0.798	0.608	6.2e-92	FB_0	Pcsk6
Fbln2	2.21e-90	0.412331	0.387	0.217	7.39e-86	FB_0	Fbln2
Morrbid	4.23e-88	0.439971	0.564	0.375	1.41e-83	FB_0	Morrbid
Fgfr2	9.68e-88	0.312555	0.4	0.22	3.23e-83	FB_0	Fgfr2
Fstl1	2.9e-84	0.435776	0.676	0.483	9.71e-80	FB_0	Fstl1
Acyp2	5.25e-84	0.442048	0.297	0.152	1.75e-79	FB_0	Acyp2
Aspn	6.57e-82	0.464366	0.217	0.099	2.2e-77	FB_0	Aspn
Sptbn1	3.81e-81	0.279476	0.915	0.783	1.27e-76	FB_0	Sptbn1
Serpine1	1.38e-80	0.643436	0.147	0.053	4.62e-76	FB_0	Serpine1
Cpeb1	1.82e-79	0.3533	0.434	0.261	6.08e-75	FB_0	Cpeb1
Ptprj	2.34e-79	0.471505	0.466	0.298	7.81e-75	FB_0	Ptprj
Neat1	5.25e-79	0.273931	0.527	0.34	1.75e-74	FB_0	Neat1
Zbtb16	5e-77	0.314341	0.711	0.521	1.67e-72	FB_0	Zbtb16
Nckap5	1.99e-76	0.406548	0.234	0.112	6.64e-72	FB_0	Nckap5
Axl	1.07e-73	0.400344	0.534	0.357	3.59e-69	FB_0	Axl
Uty	7.65e-73	0.318531	0.199	0.089	2.56e-68	FB_0	Uty
Slc8a1	5.66e-72	0.343296	0.421	0.26	1.89e-67	FB_0	Slc8a1
Ebf1	3.03e-71	0.399223	0.967	0.89	1.01e-66	FB_0	Ebf1
Msi2	1.26e-70	0.300348	0.525	0.34	4.19e-66	FB_0	Msi2
Anxa3	2.14e-70	0.362631	0.277	0.148	7.16e-66	FB_0	Anxa3
Col8a1	9.55e-67	0.363558	0.76	0.595	3.19e-62	FB_0	Col8a1
Mat2a	1.08e-66	0.356476	0.356	0.21	3.6e-62	FB_0	Mat2a
mt-Atp6	6.16e-65	0.8474	0.124	0.046	2.06e-60	FB_0	mt-Atp6
Gfpt2	7.23e-65	0.629772	0.404	0.263	2.42e-60	FB_0	Gfpt2
mt-Cytb	2.25e-64	0.661597	0.136	0.054	7.52e-60	FB_0	mt-Cytb
Adgrd1	2.44e-64	0.57804	0.277	0.158	8.17e-60	FB_0	Adgrd1
Sulf1	2.05e-62	0.290774	0.743	0.558	6.85e-58	FB_0	Sulf1
Inpp4b	2.57e-62	0.569104	0.202	0.102	8.6e-58	FB_0	Inpp4b
Adamtsl5	1.36e-61	0.315527	0.142	0.058	4.54e-57	FB_0	Adamtsl5
Uap1	1.41e-61	0.44164	0.254	0.14	4.71e-57	FB_0	Uap1
Bcl2l1	4.11e-61	0.282685	0.356	0.213	1.37e-56	FB_0	Bcl2l1
Clip1	7.21e-59	0.264738	0.243	0.128	2.41e-54	FB_0	Clip1
Pdlim5	8.25e-59	0.312827	0.388	0.245	2.76e-54	FB_0	Pdlim5
Galnt16	1.06e-58	0.372795	0.166	0.077	3.54e-54	FB_0	Galnt16
Mast2	2.41e-58	0.278312	0.231	0.121	8.05e-54	FB_0	Mast2
Dnm1	4.45e-57	0.267855	0.367	0.227	1.49e-52	FB_0	Dnm1
Sema3c	9.88e-57	0.883268	0.174	0.087	3.3e-52	FB_0	Sema3c
Dpp4	1.67e-56	0.488782	0.1	0.035	5.59e-52	FB_0	Dpp4
Itga9	1.81e-56	0.28458	0.412	0.263	6.05e-52	FB_0	Itga9
Mitf	7.82e-56	0.340149	0.13	0.053	2.61e-51	FB_0	Mitf
Ackr3	1.17e-55	0.427494	0.163	0.077	3.92e-51	FB_0	Ackr3
Samd4	1.58e-54	0.282298	0.544	0.38	5.28e-50	FB_0	Samd4
Pde10a	4.79e-54	0.445889	0.293	0.177	1.6e-49	FB_0	Pde10a
Slc25a4	7.27e-54	-0.881626	0.153	0.241	2.43e-49	FB_0	Slc25a4
Lims2	3.47e-53	0.296803	0.199	0.103	1.16e-48	FB_0	Lims2
Creb5	6.18e-53	0.38972	0.576	0.423	2.07e-48	FB_0	Creb5
Hhipl1	1.58e-52	0.252202	0.134	0.058	5.3e-48	FB_0	Hhipl1
Cox6a2	7.43e-52	-0.822685	0.076	0.152	2.48e-47	FB_0	Cox6a2
Filip1l	3.12e-50	0.258663	0.146	0.067	1.04e-45	FB_0	Filip1l
Tbc1d4	3.34e-50	0.287868	0.12	0.05	1.11e-45	FB_0	Tbc1d4
Cys1	4.89e-50	0.270406	0.196	0.104	1.64e-45	FB_0	Cys1
mt-Nd2	1.06e-49	0.458134	0.139	0.064	3.54e-45	FB_0	mt-Nd2
Vcan	7.65e-49	0.309995	0.373	0.244	2.56e-44	FB_0	Vcan
Pi16	8.45e-48	0.46367	0.235	0.137	2.82e-43	FB_0	Pi16
Itga5	1.44e-46	0.275888	0.259	0.154	4.8e-42	FB_0	Itga5
Sdk1	9.65e-46	0.456635	0.313	0.205	3.23e-41	FB_0	Sdk1
Nhsl1	4.88e-44	0.349416	0.155	0.079	1.63e-39	FB_0	Nhsl1
Tsc22d3	5.05e-44	0.261212	0.17	0.089	1.69e-39	FB_0	Tsc22d3
Pde8a	8.71e-44	0.33726	0.183	0.1	2.91e-39	FB_0	Pde8a
Gm34567	6.14e-42	0.311734	0.125	0.059	2.05e-37	FB_0	Gm34567
Tspan5	4.55e-41	0.281949	0.257	0.158	1.52e-36	FB_0	Tspan5
Ugdh	7.2e-41	0.390864	0.164	0.088	2.41e-36	FB_0	Ugdh
Spsb1	4.35e-40	0.272259	0.149	0.077	1.45e-35	FB_0	Spsb1
Mical2	2.23e-37	0.26365	0.218	0.132	7.47e-33	FB_0	Mical2
AY036118	4.52e-37	-0.836761	0.563	0.591	1.51e-32	FB_0	AY036118
Lars2	1.86e-35	-0.657799	0.346	0.404	6.21e-31	FB_0	Lars2
Ntn4	2.06e-35	0.281237	0.225	0.14	6.88e-31	FB_0	Ntn4
mt-Nd4	1.68e-34	0.317985	0.102	0.048	5.63e-30	FB_0	mt-Nd4
Robo1	4.62e-34	0.254478	0.468	0.347	1.55e-29	FB_0	Robo1
Arhgef28	2.11e-33	0.271217	0.164	0.095	7.06e-29	FB_0	Arhgef28
Tll2	6.17e-32	0.324201	0.157	0.091	2.06e-27	FB_0	Tll2
Tpm1	4.05e-30	-0.670729	0.07	0.123	1.35e-25	FB_0	Tpm1
Cd55	3.71e-29	0.269595	0.23	0.151	1.24e-24	FB_0	Cd55
Bicc1	2.03e-27	-0.250583	0.956	0.912	6.78e-23	FB_0	Bicc1
Fbn1	3.89e-23	0.341104	0.689	0.561	1.3e-18	FB_0	Fbn1
Flrt2	1.93e-21	0.259516	0.175	0.118	6.45e-17	FB_0	Flrt2
Cmss1	2.62e-19	-0.521398	0.572	0.603	8.77e-15	FB_0	Cmss1
Camk1d	2.14e-15	-0.435055	0.648	0.628	7.14e-11	FB_0	Camk1d
Gucy1a1	4.81e-14	-0.444413	0.121	0.159	1.61e-09	FB_0	Gucy1a1
Dapk1	8.75e-14	-0.50914	0.297	0.326	2.93e-09	FB_0	Dapk1
Actc1	1.46e-12	-0.54487	0.103	0.136	4.88e-08	FB_0	Actc1
Lsamp	3.45e-12	-0.336817	0.582	0.597	1.15e-07	FB_0	Lsamp
Pappa	5.09e-12	-0.396578	0.085	0.117	1.7e-07	FB_0	Pappa
Col3a1	1.37e-09	-0.331867	0.626	0.587	4.59e-05	FB_0	Col3a1
Il31ra	3.21e-09	-0.335436	0.109	0.138	0.000107247	FB_0	Il31ra
Fbn2	4.33e-09	-0.450233	0.081	0.106	0.000144748	FB_0	Fbn2
Fbln1	6.13e-08	-0.409597	0.268	0.281	0.00204987	FB_0	Fbln1
Hexb	1.45e-07	-0.355051	0.219	0.242	0.00483754	FB_0	Hexb
Plxna4	2.63e-07	-0.406202	0.097	0.121	0.0087808	FB_0	Plxna4
Rgs6	1.08e-06	-0.416237	0.442	0.442	0.036185	FB_0	Rgs6
Col6a6	5.82e-06	-0.298957	0.366	0.369	0.194501	FB_0	Col6a6
Negr1	1.18e-05	-0.261752	0.713	0.678	0.394008	FB_0	Negr1
Gm48099	4.73e-05	-0.375222	0.098	0.114	1	FB_0	Gm48099
Chrm3	6.18e-05	-0.516182	0.091	0.109	1	FB_0	Chrm3
Unc5c	0.000300096	-0.281226	0.113	0.13	1	FB_0	Unc5c
Adamtsl1	0.000593642	-0.292727	0.091	0.106	1	FB_0	Adamtsl1
Apoe	0.000740184	-0.325216	0.157	0.169	1	FB_0	Apoe
Robo2	0.00121111	-0.305024	0.107	0.121	1	FB_0	Robo2
Sned1	0.0018504	-0.335606	0.096	0.107	1	FB_0	Sned1
Nr4a1	0.00635079	-0.462981	0.18	0.186	1	FB_0	Nr4a1
Xist	0	0.984216	0.818	0.361	0	FB_1	Xist
Qk.1	3.71e-194	-1.13878	0.083	0.332	1.24e-189	FB_1	Qk
Uty.1	1.05e-137	-0.952592	0.022	0.184	3.52e-133	FB_1	Uty
Arhgap24	1.1e-131	-0.849726	0.643	0.766	3.67e-127	FB_1	Arhgap24
Zbtb16.1	3.27e-126	-0.714576	0.472	0.661	1.09e-121	FB_1	Zbtb16
Ablim1.1	4.03e-117	-1.00337	0.098	0.279	1.35e-112	FB_1	Ablim1
Ppp1r12b	7.46e-114	-0.854853	0.118	0.308	2.49e-109	FB_1	Ppp1r12b
Pcdh7.1	1.06e-113	-1.1486	0.041	0.194	3.53e-109	FB_1	Pcdh7
Neat1.1	5.86e-104	-0.706032	0.277	0.483	1.96e-99	FB_1	Neat1
mt-Co1	5.77e-102	-1.49621	0.031	0.165	1.93e-97	FB_1	mt-Co1
Pcdh9	1.61e-100	0.472949	0.956	0.909	5.4e-96	FB_1	Pcdh9
Tbc1d4.1	9.3e-100	-0.82455	0.004	0.112	3.11e-95	FB_1	Tbc1d4
Lvrn	3.51e-99	-1.00758	0.07	0.219	1.17e-94	FB_1	Lvrn
mt-Cytb.1	8.51e-97	-1.24637	0.011	0.123	2.84e-92	FB_1	mt-Cytb
Filip1l.1	3.01e-94	-0.810419	0.019	0.136	1.01e-89	FB_1	Filip1l
Adamtsl3	2.65e-93	0.514987	0.617	0.439	8.86e-89	FB_1	Adamtsl3
mt-Atp6.1	2.37e-87	-1.56721	0.009	0.11	7.93e-83	FB_1	mt-Atp6
Mast4	3.37e-82	0.407755	0.953	0.912	1.13e-77	FB_1	Mast4
Fmo2	2.16e-80	-0.810795	0.112	0.256	7.21e-76	FB_1	Fmo2
Slc8a1.1	4.38e-80	-0.571217	0.206	0.383	1.46e-75	FB_1	Slc8a1
Fgfr2.1	7.21e-80	-0.597177	0.181	0.35	2.41e-75	FB_1	Fgfr2
Negr1.1	1.45e-77	0.580812	0.776	0.664	4.85e-73	FB_1	Negr1
Lsamp.1	2.11e-76	0.593945	0.693	0.551	7.04e-72	FB_1	Lsamp
Slc43a3	2.55e-76	-0.61554	0.462	0.613	8.53e-72	FB_1	Slc43a3
Eif2s3y	3.64e-75	-0.570765	0.011	0.101	1.22e-70	FB_1	Eif2s3y
Mitf.1	1.31e-74	-0.671425	0.018	0.115	4.38e-70	FB_1	Mitf
Col15a1	9.96e-72	0.470286	0.709	0.581	3.33e-67	FB_1	Col15a1
Tmtc1	1.64e-70	-0.632644	0.322	0.481	5.5e-66	FB_1	Tmtc1
Ddx3y	2.99e-70	-0.577908	0.013	0.102	9.98e-66	FB_1	Ddx3y
Ctnna1	1.95e-64	-0.563867	0.08	0.2	6.52e-60	FB_1	Ctnna1
Bicc1.1	9.06e-63	0.351342	0.953	0.925	3.03e-58	FB_1	Bicc1
Adarb1	1.08e-62	-0.61752	0.093	0.212	3.62e-58	FB_1	Adarb1
Ngf	1.92e-62	0.495857	0.716	0.616	6.41e-58	FB_1	Ngf
Adgrl3	1.07e-59	0.556971	0.575	0.453	3.59e-55	FB_1	Adgrl3
Phactr2	1.41e-59	-0.504739	0.026	0.114	4.73e-55	FB_1	Phactr2
Atp5g3	5.69e-59	0.519529	0.115	0.043	1.9e-54	FB_1	Atp5g3
Gm42418.1	1.26e-58	0.260829	0.869	0.727	4.21e-54	FB_1	Gm42418
C7	1.35e-56	-1.08973	0.042	0.133	4.53e-52	FB_1	C7
Clasp1	1.82e-55	-0.49619	0.081	0.193	6.07e-51	FB_1	Clasp1
Slc25a4.1	5.43e-55	0.532812	0.281	0.169	1.81e-50	FB_1	Slc25a4
Ddx5	2.63e-52	-0.483458	0.369	0.509	8.78e-48	FB_1	Ddx5
Nckap5.1	3.66e-52	-0.588179	0.091	0.198	1.22e-47	FB_1	Nckap5
Prkca.1	5.19e-51	-0.473324	0.311	0.452	1.74e-46	FB_1	Prkca
Gm26992	2.02e-50	0.503208	0.1	0.038	6.74e-46	FB_1	Gm26992
Col6a3	3e-49	0.398238	0.532	0.412	1e-44	FB_1	Col6a3
Smoc2	3.08e-49	0.382077	0.711	0.604	1.03e-44	FB_1	Smoc2
Gucy1a1.1	6.41e-49	0.517081	0.209	0.116	2.14e-44	FB_1	Gucy1a1
Clip1.1	3.99e-47	-0.455	0.103	0.211	1.33e-42	FB_1	Clip1
Slit3	3.42e-46	-0.562094	0.498	0.606	1.14e-41	FB_1	Slit3
mt-Nd2.1	3.57e-46	-0.632238	0.041	0.121	1.19e-41	FB_1	mt-Nd2
Acyp2.1	1.71e-45	-0.477905	0.137	0.25	5.73e-41	FB_1	Acyp2
Lrrfip2	2.01e-44	-0.432804	0.053	0.137	6.72e-40	FB_1	Lrrfip2
Ehbp1	2.3e-44	-0.379052	0.389	0.528	7.67e-40	FB_1	Ehbp1
Srsf2	1.44e-41	-0.446864	0.117	0.219	4.8e-37	FB_1	Srsf2
Fkbp5	1.67e-41	-0.44671	0.418	0.538	5.59e-37	FB_1	Fkbp5
2011-09-01	3.16e-41	0.406363	0.609	0.516	1.06e-36	FB_1	45911
Adam19	4.62e-41	0.449745	0.449	0.348	1.54e-36	FB_1	Adam19
Plxdc2	1e-39	0.326055	0.903	0.875	3.36e-35	FB_1	Plxdc2
Jarid2	1.37e-39	0.461196	0.56	0.476	4.57e-35	FB_1	Jarid2
Mast2.1	3.28e-39	-0.428501	0.103	0.198	1.1e-34	FB_1	Mast2
Pdlim3	1.42e-38	-0.726317	0.042	0.112	4.76e-34	FB_1	Pdlim3
Col14a1	8.52e-38	0.442388	0.309	0.214	2.85e-33	FB_1	Col14a1
Mb	1.72e-37	0.808163	0.103	0.047	5.75e-33	FB_1	Mb
Nfyc	3.6e-37	-0.360764	0.043	0.115	1.2e-32	FB_1	Nfyc
Dpyd	6.25e-37	-0.71852	0.135	0.226	2.09e-32	FB_1	Dpyd
Tenm3	7.51e-37	0.270611	0.876	0.824	2.51e-32	FB_1	Tenm3
Rgs6.1	1.34e-36	0.54208	0.511	0.417	4.47e-32	FB_1	Rgs6
Plekhm2	1.65e-36	-0.358229	0.068	0.148	5.51e-32	FB_1	Plekhm2
Prkd1	3.84e-36	-0.512282	0.067	0.144	1.28e-31	FB_1	Prkd1
Vav3	4.79e-36	0.390956	0.677	0.603	1.6e-31	FB_1	Vav3
Dock4	1.39e-35	-0.424703	0.239	0.347	4.66e-31	FB_1	Dock4
Trhde	1.7e-35	0.46344	0.33	0.235	5.68e-31	FB_1	Trhde
Zbtb7c	2.5e-35	0.369731	0.529	0.436	8.37e-31	FB_1	Zbtb7c
Lama4	2.62e-35	0.344255	0.703	0.63	8.75e-31	FB_1	Lama4
Cdh19	5.85e-35	0.413819	0.423	0.328	1.95e-30	FB_1	Cdh19
Msi2.1	7.62e-35	-0.367628	0.343	0.457	2.55e-30	FB_1	Msi2
Serpine1.1	1.23e-34	-0.577112	0.047	0.115	4.1e-30	FB_1	Serpine1
Pdlim5.1	5.95e-34	-0.45253	0.233	0.34	1.99e-29	FB_1	Pdlim5
Col27a1	1.08e-33	0.464971	0.268	0.184	3.62e-29	FB_1	Col27a1
St3gal4	4.48e-33	0.397127	0.473	0.384	1.5e-28	FB_1	St3gal4
Col3a1.1	8.13e-33	0.374166	0.659	0.585	2.72e-28	FB_1	Col3a1
Anxa3.1	1.08e-32	-0.440474	0.142	0.232	3.61e-28	FB_1	Anxa3
Unc5c.1	6.03e-32	0.486207	0.174	0.103	2.01e-27	FB_1	Unc5c
Ace	6.82e-32	-0.407764	0.088	0.165	2.28e-27	FB_1	Ace
Lars2.1	1.39e-31	0.329909	0.448	0.351	4.65e-27	FB_1	Lars2
Adamts12	1.5e-31	0.429754	0.482	0.397	5.02e-27	FB_1	Adamts12
Dpep1	4.52e-31	-0.263719	0.325	0.43	1.51e-26	FB_1	Dpep1
Igfbp7	8.45e-31	0.3155	0.654	0.57	2.82e-26	FB_1	Igfbp7
Actc1.1	2.04e-30	0.507432	0.169	0.103	6.82e-26	FB_1	Actc1
Sgcd	5.36e-30	0.375448	0.803	0.764	1.79e-25	FB_1	Sgcd
Large1	7.55e-30	-0.310029	0.409	0.525	2.52e-25	FB_1	Large1
Tsix	8.81e-30	0.326595	0.191	0.118	2.95e-25	FB_1	Tsix
Ccn5	9.11e-30	-0.485155	0.052	0.115	3.04e-25	FB_1	Ccn5
Thrb	9.37e-30	-0.423389	0.098	0.175	3.13e-25	FB_1	Thrb
Psd3	1.51e-29	0.261914	0.794	0.737	5.03e-25	FB_1	Psd3
Magi1	4.69e-29	-0.439607	0.086	0.159	1.57e-24	FB_1	Magi1
Kidins220	5.08e-29	-0.319953	0.083	0.157	1.7e-24	FB_1	Kidins220
Pde4b	1.29e-28	-0.359695	0.082	0.154	4.3e-24	FB_1	Pde4b
Myl6	1.31e-28	-0.34881	0.096	0.173	4.38e-24	FB_1	Myl6
Tns1	1.44e-28	-0.389009	0.186	0.28	4.81e-24	FB_1	Tns1
Chchd3	1.8e-28	-0.352608	0.12	0.201	6.03e-24	FB_1	Chchd3
Aldh1a2	2.71e-28	0.452019	0.185	0.117	9.05e-24	FB_1	Aldh1a2
Itpr1	3.59e-28	0.299009	0.745	0.692	1.2e-23	FB_1	Itpr1
Pde7a	1.16e-27	-0.294572	0.054	0.116	3.89e-23	FB_1	Pde7a
Tsc22d3.1	1.62e-27	-0.375052	0.077	0.145	5.42e-23	FB_1	Tsc22d3
Slc38a2	1.83e-27	-0.364863	0.116	0.194	6.11e-23	FB_1	Slc38a2
Tpm1.1	2.1e-27	0.42217	0.141	0.082	7e-23	FB_1	Tpm1
Hnrnpl	7.75e-27	-0.285107	0.068	0.134	2.59e-22	FB_1	Hnrnpl
Plcb4	1.27e-26	-0.341154	0.268	0.365	4.24e-22	FB_1	Plcb4
Slco3a1.1	1.89e-26	-0.374792	0.221	0.311	6.3e-22	FB_1	Slco3a1
Cox6a2.1	1.93e-26	0.286936	0.163	0.099	6.45e-22	FB_1	Cox6a2
Fbln1.1	2.23e-26	0.414725	0.331	0.254	7.46e-22	FB_1	Fbln1
Lims2.1	9.77e-26	-0.379397	0.097	0.166	3.27e-21	FB_1	Lims2
Eya2	1.3e-25	-0.36815	0.268	0.36	4.35e-21	FB_1	Eya2
Nrip1	1.58e-25	-0.32933	0.269	0.366	5.3e-21	FB_1	Nrip1
Ifi205	2.29e-25	-0.461713	0.149	0.225	7.64e-21	FB_1	Ifi205
Angpt1	2.77e-25	-0.358451	0.3	0.398	9.26e-21	FB_1	Angpt1
Lysmd4	4.01e-25	-0.290609	0.058	0.118	1.34e-20	FB_1	Lysmd4
Ncald	1.03e-24	0.401709	0.366	0.291	3.44e-20	FB_1	Ncald
Zeb2	1.42e-24	0.257436	0.846	0.807	4.76e-20	FB_1	Zeb2
Gucy1b1	2.63e-24	0.376827	0.16	0.102	8.8e-20	FB_1	Gucy1b1
Leng8	3.57e-24	-0.302994	0.123	0.198	1.19e-19	FB_1	Leng8
Ptprm	4.09e-24	-0.267273	0.396	0.498	1.37e-19	FB_1	Ptprm
Klhl29	4.5e-24	-0.393588	0.073	0.134	1.5e-19	FB_1	Klhl29
Pla1a.1	8.13e-24	-0.365519	0.154	0.231	2.72e-19	FB_1	Pla1a
Adap2os	1.14e-23	-0.361986	0.105	0.174	3.81e-19	FB_1	Adap2os
Spry2	1.26e-23	0.359903	0.181	0.12	4.2e-19	FB_1	Spry2
Ndufb7	1.31e-23	0.256036	0.107	0.059	4.39e-19	FB_1	Ndufb7
Robo2.1	2.44e-23	0.503116	0.156	0.099	8.15e-19	FB_1	Robo2
Astn2	7.35e-23	0.385417	0.174	0.114	2.46e-18	FB_1	Astn2
Cyp27a1	9.54e-23	-0.362906	0.272	0.358	3.19e-18	FB_1	Cyp27a1
Gm37240	9.86e-23	-0.340457	0.094	0.159	3.3e-18	FB_1	Gm37240
Myl3	1.15e-22	0.514748	0.108	0.062	3.84e-18	FB_1	Myl3
Ptprg	1.85e-22	-0.278629	0.37	0.468	6.17e-18	FB_1	Ptprg
Phactr4	1.91e-22	-0.340783	0.151	0.224	6.39e-18	FB_1	Phactr4
Adamtsl5.1	3.56e-22	-0.269261	0.057	0.112	1.19e-17	FB_1	Adamtsl5
Plxna4.1	3.86e-22	0.585724	0.149	0.095	1.29e-17	FB_1	Plxna4
Spon1	3.97e-22	-0.408813	0.395	0.469	1.33e-17	FB_1	Spon1
Il1r1	4.97e-22	0.322704	0.476	0.405	1.66e-17	FB_1	Il1r1
Slit2	5.14e-22	0.358982	0.563	0.495	1.72e-17	FB_1	Slit2
Fap	1.31e-21	0.362306	0.475	0.411	4.37e-17	FB_1	Fap
Fmo1	1.47e-21	-0.282997	0.074	0.132	4.92e-17	FB_1	Fmo1
Gria3	2.25e-21	-0.437722	0.143	0.21	7.5e-17	FB_1	Gria3
Il6st	3.44e-21	0.30686	0.358	0.29	1.15e-16	FB_1	Il6st
Gm26532	3.72e-21	-0.30329	0.06	0.113	1.24e-16	FB_1	Gm26532
Akap12	5.17e-21	0.307477	0.468	0.397	1.73e-16	FB_1	Akap12
mt-Nd5	5.19e-21	-0.28136	0.071	0.127	1.73e-16	FB_1	mt-Nd5
Man2a1	7.4e-21	-0.423632	0.385	0.458	2.47e-16	FB_1	Man2a1
Rgs7	8.62e-21	0.46354	0.237	0.174	2.88e-16	FB_1	Rgs7
Gfra1	1.26e-20	0.326057	0.418	0.345	4.21e-16	FB_1	Gfra1
Klhl2	1.55e-20	-0.326662	0.066	0.119	5.17e-16	FB_1	Klhl2
2610307P16Rik	1.89e-20	0.372012	0.1	0.058	6.31e-16	FB_1	2610307P16Rik
Papss2	2.61e-20	-0.350075	0.109	0.172	8.73e-16	FB_1	Papss2
Ltbp1	4.87e-20	-0.30445	0.402	0.485	1.63e-15	FB_1	Ltbp1
Fbxw7	5.43e-20	-0.27864	0.092	0.153	1.81e-15	FB_1	Fbxw7
Ar	8.77e-20	0.287869	0.588	0.521	2.93e-15	FB_1	Ar
Pakap	8.82e-20	-0.328205	0.119	0.183	2.95e-15	FB_1	Pakap
Rbpms	1.01e-19	-0.267149	0.44	0.528	3.37e-15	FB_1	Rbpms
Clk1	1.18e-19	-0.280935	0.178	0.253	3.94e-15	FB_1	Clk1
Galnt16.1	1.27e-19	-0.342532	0.078	0.133	4.25e-15	FB_1	Galnt16
Kcnip1	1.35e-19	0.409986	0.236	0.172	4.53e-15	FB_1	Kcnip1
Nampt	1.62e-19	-0.276671	0.053	0.102	5.43e-15	FB_1	Nampt
Syn3	1.64e-19	-0.598586	0.124	0.185	5.49e-15	FB_1	Syn3
Nalcn	1.77e-19	-0.323186	0.214	0.289	5.92e-15	FB_1	Nalcn
Tns3	1.82e-19	0.279012	0.336	0.268	6.09e-15	FB_1	Tns3
Egr1	2.03e-19	-0.345141	0.287	0.365	6.78e-15	FB_1	Egr1
Smad3	3e-19	0.322888	0.438	0.377	1e-14	FB_1	Smad3
Actb	8.22e-19	-0.292771	0.155	0.225	2.75e-14	FB_1	Actb
Strbp	9.74e-19	-0.298878	0.164	0.234	3.25e-14	FB_1	Strbp
Dchs2	1.04e-18	0.304304	0.248	0.184	3.47e-14	FB_1	Dchs2
Samd4.1	1.24e-18	-0.250384	0.393	0.48	4.15e-14	FB_1	Samd4
1010001N08Rik	1.33e-18	-0.303403	0.06	0.109	4.44e-14	FB_1	1010001N08Rik
Ptprk	1.67e-18	-0.35207	0.131	0.194	5.59e-14	FB_1	Ptprk
Timp3	1.74e-18	-0.41517	0.38	0.451	5.8e-14	FB_1	Timp3
Ube2b	1.8e-18	-0.265353	0.118	0.182	6.01e-14	FB_1	Ube2b
Arglu1	2e-18	-0.263672	0.291	0.373	6.67e-14	FB_1	Arglu1
Pcgf5	2.12e-18	-0.287259	0.08	0.134	7.08e-14	FB_1	Pcgf5
Aspn.1	2.19e-18	-0.32661	0.111	0.17	7.33e-14	FB_1	Aspn
Tfdp2	3.73e-18	-0.270905	0.096	0.154	1.25e-13	FB_1	Tfdp2
Dclk1	4.49e-18	0.305257	0.454	0.392	1.5e-13	FB_1	Dclk1
Ppl	5.34e-18	-0.306427	0.081	0.133	1.79e-13	FB_1	Ppl
AC149090.1	6.38e-18	-0.304042	0.258	0.332	2.13e-13	FB_1	AC149090.1
Atxn2l	7.32e-18	-0.251602	0.066	0.115	2.45e-13	FB_1	Atxn2l
Agmo	9.49e-18	0.284482	0.596	0.535	3.17e-13	FB_1	Agmo
Slc1a3	9.55e-18	0.334017	0.271	0.21	3.19e-13	FB_1	Slc1a3
Plxnc1	1.27e-17	0.27465	0.169	0.117	4.24e-13	FB_1	Plxnc1
Ube2g1	1.32e-17	-0.25656	0.141	0.206	4.41e-13	FB_1	Ube2g1
Steap3	1.36e-17	0.313334	0.347	0.284	4.53e-13	FB_1	Steap3
Cebpd	1.42e-17	-0.296688	0.112	0.17	4.73e-13	FB_1	Cebpd
Slc24a3	1.61e-17	0.314361	0.25	0.191	5.39e-13	FB_1	Slc24a3
Ppfia2	1.71e-17	0.387089	0.19	0.136	5.71e-13	FB_1	Ppfia2
Rnf144a	1.73e-17	0.276659	0.123	0.079	5.79e-13	FB_1	Rnf144a
Uvrag	3.3e-17	-0.262525	0.33	0.41	1.1e-12	FB_1	Uvrag
Tsc22d4	3.45e-17	-0.273052	0.062	0.108	1.15e-12	FB_1	Tsc22d4
Rassf2	3.47e-17	0.269072	0.12	0.076	1.16e-12	FB_1	Rassf2
Ifrd1	6.07e-17	-0.273246	0.095	0.15	2.03e-12	FB_1	Ifrd1
Rgma	8.35e-17	0.280153	0.36	0.299	2.79e-12	FB_1	Rgma
Spred1	8.85e-17	0.277032	0.401	0.344	2.96e-12	FB_1	Spred1
Raph1	1.2e-16	0.368931	0.496	0.448	4.02e-12	FB_1	Raph1
Dlg2	1.94e-16	-0.272777	0.253	0.324	6.48e-12	FB_1	Dlg2
Fndc1	2.26e-16	0.266823	0.52	0.458	7.56e-12	FB_1	Fndc1
Sh3rf3	3.1e-16	0.324154	0.427	0.371	1.04e-11	FB_1	Sh3rf3
Prickle2	3.21e-16	0.26133	0.571	0.516	1.07e-11	FB_1	Prickle2
Gm10800	3.78e-16	-0.408334	0.066	0.111	1.26e-11	FB_1	Gm10800
Fbln2.1	5.44e-16	-0.281619	0.245	0.315	1.82e-11	FB_1	Fbln2
Tef	6.28e-16	-0.255595	0.161	0.226	2.1e-11	FB_1	Tef
Cdon	7.26e-16	0.299804	0.25	0.195	2.43e-11	FB_1	Cdon
Mamdc2	7.73e-16	0.319163	0.118	0.076	2.58e-11	FB_1	Mamdc2
Ubc	1.01e-15	-0.269504	0.062	0.105	3.39e-11	FB_1	Ubc
Lamb1	1.34e-15	0.299022	0.395	0.34	4.48e-11	FB_1	Lamb1
Chrm3.1	1.75e-15	0.653064	0.132	0.089	5.86e-11	FB_1	Chrm3
Cyp7b1	2.51e-15	0.269302	0.127	0.084	8.39e-11	FB_1	Cyp7b1
Ier2	2.58e-15	-0.281231	0.077	0.123	8.61e-11	FB_1	Ier2
Kcnn3	2.67e-15	0.332247	0.121	0.08	8.93e-11	FB_1	Kcnn3
Bcl2l1.1	4.85e-15	-0.260877	0.229	0.298	1.62e-10	FB_1	Bcl2l1
Eps8	5.17e-15	0.268761	0.424	0.367	1.73e-10	FB_1	Eps8
Arhgap32	5.42e-15	0.272849	0.488	0.441	1.81e-10	FB_1	Arhgap32
Mat2a.1	8.04e-15	-0.311171	0.23	0.296	2.69e-10	FB_1	Mat2a
Nr3c1	9.04e-15	0.276241	0.456	0.404	3.02e-10	FB_1	Nr3c1
Dennd4a	1.43e-14	-0.282238	0.228	0.294	4.78e-10	FB_1	Dennd4a
C730002L08Rik	2.2e-14	-0.321532	0.091	0.139	7.35e-10	FB_1	C730002L08Rik
CT025619.1	3.14e-14	0.310644	0.123	0.083	1.05e-09	FB_1	CT025619.1
Hsd11b1	3.33e-14	-0.296516	0.125	0.178	1.11e-09	FB_1	Hsd11b1
Adamtsl1.1	1.54e-13	0.4132	0.128	0.088	5.14e-09	FB_1	Adamtsl1
Tox	1.64e-13	-0.314667	0.101	0.149	5.48e-09	FB_1	Tox
Tlr4	2.13e-13	-0.255635	0.061	0.1	7.12e-09	FB_1	Tlr4
Syn2	2.41e-13	0.334513	0.145	0.103	8.06e-09	FB_1	Syn2
B4galt1	3.69e-13	0.269747	0.47	0.418	1.23e-08	FB_1	B4galt1
Itga5.1	4.35e-13	-0.28774	0.162	0.217	1.46e-08	FB_1	Itga5
Mef2c	4.54e-13	-0.253065	0.112	0.16	1.52e-08	FB_1	Mef2c
Daam1	4.59e-13	0.264511	0.509	0.469	1.53e-08	FB_1	Daam1
Gna14	7.83e-13	0.321408	0.108	0.073	2.62e-08	FB_1	Gna14
Dock10	8.36e-13	0.27778	0.429	0.379	2.79e-08	FB_1	Dock10
Prkg1	9.67e-13	0.257261	0.729	0.703	3.23e-08	FB_1	Prkg1
Grik2	1.16e-12	0.319668	0.308	0.257	3.88e-08	FB_1	Grik2
Vegfc	1.37e-12	0.331171	0.325	0.278	4.57e-08	FB_1	Vegfc
Gm48099.1	1.51e-12	0.353506	0.134	0.096	5.03e-08	FB_1	Gm48099
Scara5	2.22e-12	-0.250761	0.356	0.418	7.43e-08	FB_1	Scara5
Epha7	2.56e-12	0.369191	0.126	0.089	8.55e-08	FB_1	Epha7
Tspan5.1	5.66e-12	-0.271476	0.166	0.218	1.89e-07	FB_1	Tspan5
Sesn3	5.68e-12	0.250008	0.147	0.108	1.9e-07	FB_1	Sesn3
Ptprj.1	6.39e-12	-0.292905	0.334	0.393	2.13e-07	FB_1	Ptprj
Hivep1	1.5e-11	0.265448	0.276	0.23	5.02e-07	FB_1	Hivep1
Rap2a	1.97e-11	0.29025	0.149	0.111	6.6e-07	FB_1	Rap2a
Mfap5.1	2.3e-11	-0.305079	0.255	0.309	7.68e-07	FB_1	Mfap5
Gm14005	3.26e-11	0.376573	0.101	0.069	1.09e-06	FB_1	Gm14005
Lepr	3.73e-11	0.29729	0.181	0.139	1.25e-06	FB_1	Lepr
Arsj	1.08e-10	0.281988	0.192	0.152	3.62e-06	FB_1	Arsj
Acss3	1.2e-10	-0.254869	0.128	0.173	4.02e-06	FB_1	Acss3
Sned1.1	2.11e-10	0.339497	0.126	0.093	7.07e-06	FB_1	Sned1
Zfp36l1	3.94e-10	0.283962	0.205	0.166	1.32e-05	FB_1	Zfp36l1
Srgap3	4.54e-10	0.258208	0.171	0.134	1.52e-05	FB_1	Srgap3
Nr4a1.1	7.98e-10	0.379528	0.212	0.173	2.67e-05	FB_1	Nr4a1
Plce1	9.86e-10	-0.267733	0.267	0.318	3.29e-05	FB_1	Plce1
Anks1b	1.09e-09	0.282497	0.249	0.207	3.63e-05	FB_1	Anks1b
Kdm6a	1.39e-09	0.25248	0.322	0.284	4.66e-05	FB_1	Kdm6a
Tgfb2	1.96e-09	0.259734	0.266	0.227	6.56e-05	FB_1	Tgfb2
Ifi207	2.11e-09	-0.276909	0.226	0.271	7.07e-05	FB_1	Ifi207
Blnk	2.17e-09	-0.265878	0.128	0.167	7.26e-05	FB_1	Blnk
Gm26917	2.21e-09	-0.260414	0.322	0.372	7.4e-05	FB_1	Gm26917
Nkain2	2.6e-09	-0.283769	0.171	0.215	8.69e-05	FB_1	Nkain2
Fstl1.1	3.81e-09	-0.251454	0.542	0.584	0.000127287	FB_1	Fstl1
Grm8	6.68e-09	0.403116	0.1	0.072	0.000223299	FB_1	Grm8
Fat3	3.2e-08	0.256861	0.123	0.093	0.00107014	FB_1	Fat3
Pde7b	3.66e-08	0.256999	0.249	0.212	0.00122198	FB_1	Pde7b
Adgrd1.1	5.54e-08	-0.25738	0.182	0.225	0.00185289	FB_1	Adgrd1
Ppp1r2	6.82e-08	0.250681	0.225	0.191	0.00227962	FB_1	Ppp1r2
Uap1.1	1.47e-07	-0.257398	0.165	0.204	0.00490975	FB_1	Uap1
Sema3c.1	4.57e-06	-0.506351	0.108	0.135	0.15283	FB_1	Sema3c
Eln	7.08e-05	-0.28921	0.312	0.344	1	FB_1	Eln
Xist.1	3.45e-235	-1.15694	0.209	0.562	1.15e-230	FB_2	Xist
Adamtsl3.1	7e-200	-1.03502	0.223	0.562	2.34e-195	FB_2	Adamtsl3
Robo1.1	2.77e-111	-0.68653	0.209	0.458	9.27e-107	FB_2	Robo1
Psd3.1	7.91e-94	-0.462369	0.56	0.807	2.64e-89	FB_2	Psd3
Gab2	2.89e-93	-0.420094	0.738	0.91	9.65e-89	FB_2	Gab2
Zfpm2	1.15e-92	-0.391983	0.758	0.928	3.85e-88	FB_2	Zfpm2
Gfpt2.1	9.75e-92	-0.844809	0.167	0.375	3.26e-87	FB_2	Gfpt2
Vcan.1	1.95e-90	-0.621369	0.145	0.349	6.53e-86	FB_2	Vcan
Trps1	1.98e-89	-0.439857	0.635	0.862	6.62e-85	FB_2	Trps1
Tbx20	6.01e-89	-0.58925	0.378	0.624	2.01e-84	FB_2	Tbx20
Col14a1.1	7.95e-88	-0.685267	0.099	0.279	2.66e-83	FB_2	Col14a1
Zbtb7c.1	1.15e-86	-0.448874	0.267	0.515	3.84e-82	FB_2	Zbtb7c
Arhgap24.1	6.5e-85	0.670184	0.76	0.725	2.17e-80	FB_2	Arhgap24
Sulf1.1	1.52e-84	-0.444999	0.437	0.703	5.07e-80	FB_2	Sulf1
Vav3.1	5.48e-82	-0.470373	0.426	0.679	1.83e-77	FB_2	Vav3
St3gal4.1	6.61e-79	-0.489408	0.236	0.457	2.21e-74	FB_2	St3gal4
Fndc1.1	9.29e-79	-0.480685	0.297	0.525	3.11e-74	FB_2	Fndc1
Zfp521	2.88e-77	-0.418749	0.491	0.734	9.64e-73	FB_2	Zfp521
Ldlrad4	1.44e-75	-0.379107	0.579	0.802	4.81e-71	FB_2	Ldlrad4
Akap13	8.36e-75	-0.404435	0.546	0.78	2.79e-70	FB_2	Akap13
Gas7	6.25e-74	-0.507426	0.116	0.289	2.09e-69	FB_2	Gas7
Mfap5.2	3.77e-73	-0.468407	0.149	0.335	1.26e-68	FB_2	Mfap5
Pde7b.1	1.5e-72	-0.650695	0.098	0.257	5e-68	FB_2	Pde7b
Akt3	5.4e-71	-0.35193	0.498	0.753	1.81e-66	FB_2	Akt3
Fstl1.2	1.61e-70	-0.407223	0.383	0.626	5.38e-66	FB_2	Fstl1
Tsix.1	3.47e-70	-0.552686	0.039	0.166	1.16e-65	FB_2	Tsix
Ank2	1.24e-69	-0.376038	0.616	0.824	4.15e-65	FB_2	Ank2
Rap1a	1.11e-68	-0.386386	0.167	0.358	3.7e-64	FB_2	Rap1a
Fndc3a	1.72e-68	-0.348801	0.329	0.574	5.76e-64	FB_2	Fndc3a
Sdk1.1	2.04e-68	-0.636519	0.129	0.291	6.81e-64	FB_2	Sdk1
Tenm3.1	3.75e-68	-0.323016	0.685	0.881	1.25e-63	FB_2	Tenm3
Adgrl3.1	2.31e-67	-0.466121	0.324	0.532	7.71e-63	FB_2	Adgrl3
Cd55.1	2.05e-66	-0.518881	0.077	0.219	6.85e-62	FB_2	Cd55
Dclk1.1	2.21e-65	-0.412907	0.247	0.455	7.38e-61	FB_2	Dclk1
Pam	3.2e-65	-0.346021	0.542	0.774	1.07e-60	FB_2	Pam
Cdh19.1	5.28e-65	-0.375859	0.202	0.396	1.76e-60	FB_2	Cdh19
Lpp	2.45e-64	-0.315189	0.513	0.761	8.2e-60	FB_2	Lpp
Stim2	2.74e-64	-0.376728	0.132	0.302	9.16e-60	FB_2	Stim2
Spred1.1	3.21e-64	-0.327719	0.203	0.404	1.07e-59	FB_2	Spred1
Cep170	3.96e-64	-0.323291	0.218	0.427	1.32e-59	FB_2	Cep170
Kcnt2	4.71e-64	-0.319887	0.794	0.937	1.57e-59	FB_2	Kcnt2
Smurf2	7.37e-64	-0.326408	0.239	0.456	2.46e-59	FB_2	Smurf2
Fer	1.41e-63	-0.278225	0.3	0.543	4.73e-59	FB_2	Fer
Abi1	1.45e-63	-0.346842	0.294	0.52	4.85e-59	FB_2	Abi1
Syne1	2.21e-63	-0.319455	0.227	0.434	7.4e-59	FB_2	Syne1
Agmo.1	2.33e-63	-0.402304	0.381	0.6	7.79e-59	FB_2	Agmo
Pknox2	4.61e-63	-0.33691	0.273	0.494	1.54e-58	FB_2	Pknox2
Sestd1	4.96e-63	-0.34284	0.154	0.334	1.66e-58	FB_2	Sestd1
Stxbp6	8.85e-63	-0.420982	0.169	0.344	2.96e-58	FB_2	Stxbp6
Fhl1	3.22e-62	-0.400177	0.141	0.31	1.07e-57	FB_2	Fhl1
Atp10a	8.28e-62	-0.370684	0.116	0.274	2.77e-57	FB_2	Atp10a
Usp34	2.22e-61	-0.272573	0.34	0.586	7.4e-57	FB_2	Usp34
Il16	2.58e-61	-0.404836	0.07	0.203	8.63e-57	FB_2	Il16
Dcbld2	3.66e-61	-0.289313	0.18	0.368	1.22e-56	FB_2	Dcbld2
Trio	4.38e-61	-0.272665	0.258	0.477	1.46e-56	FB_2	Trio
Tsc22d2	5.23e-61	-0.313835	0.199	0.393	1.75e-56	FB_2	Tsc22d2
Myo9a	8.27e-61	-0.309707	0.298	0.524	2.76e-56	FB_2	Myo9a
Ebf1.1	1.95e-60	-0.41267	0.842	0.95	6.53e-56	FB_2	Ebf1
Pde10a.1	3.22e-60	-0.515206	0.114	0.264	1.07e-55	FB_2	Pde10a
Jarid2.1	6.63e-60	-0.365469	0.331	0.546	2.22e-55	FB_2	Jarid2
Tcf12	7e-60	-0.287974	0.525	0.766	2.34e-55	FB_2	Tcf12
Ston2	7.97e-60	-0.330699	0.142	0.307	2.66e-55	FB_2	Ston2
Cd34	1.64e-59	-0.338462	0.188	0.374	5.49e-55	FB_2	Cd34
Dlg1	1.2e-58	-0.2574	0.305	0.535	4e-54	FB_2	Dlg1
Stxbp5	2.52e-58	-0.27275	0.227	0.431	8.43e-54	FB_2	Stxbp5
Nr3c1.1	3.29e-58	-0.299811	0.257	0.464	1.1e-53	FB_2	Nr3c1
Ptprj.2	1.05e-57	-0.389152	0.231	0.418	3.52e-53	FB_2	Ptprj
Pla2g4a	2.21e-57	-0.365375	0.102	0.245	7.4e-53	FB_2	Pla2g4a
Add3	9.28e-57	-0.286775	0.287	0.498	3.1e-52	FB_2	Add3
Ptk2	9.53e-57	-0.255819	0.297	0.523	3.18e-52	FB_2	Ptk2
Ext1	1.86e-56	-0.331904	0.633	0.827	6.2e-52	FB_2	Ext1
Grk5	2.86e-56	-0.315526	0.336	0.552	9.55e-52	FB_2	Grk5
Nedd9	3.46e-56	-0.361985	0.148	0.308	1.16e-51	FB_2	Nedd9
Emp1	4.87e-56	-0.354122	0.095	0.233	1.63e-51	FB_2	Emp1
Asap2	1.03e-55	-0.321199	0.069	0.194	3.45e-51	FB_2	Asap2
Smoc2.1	2.22e-55	-0.304701	0.455	0.683	7.43e-51	FB_2	Smoc2
Myof	2.61e-55	-0.267684	0.137	0.296	8.71e-51	FB_2	Myof
Sptbn1.1	5.87e-55	-0.262504	0.713	0.882	1.96e-50	FB_2	Sptbn1
Arhgap42	8.48e-55	-0.279185	0.281	0.492	2.83e-50	FB_2	Arhgap42
Sema3c.2	1.23e-54	-0.853023	0.046	0.15	4.11e-50	FB_2	Sema3c
AY036118.1	2.57e-54	1.13659	0.615	0.567	8.59e-50	FB_2	AY036118
Atp8b1	4.2e-54	-0.277657	0.346	0.568	1.41e-49	FB_2	Atp8b1
Dnm1.1	6.66e-54	-0.253935	0.161	0.33	2.23e-49	FB_2	Dnm1
Gsk3b	6.96e-54	-0.262175	0.259	0.466	2.33e-49	FB_2	Gsk3b
Klf12	7.97e-54	-0.341816	0.312	0.509	2.66e-49	FB_2	Klf12
Cdk13	1.02e-53	-0.2611	0.244	0.443	3.4e-49	FB_2	Cdk13
Col8a1.1	4.01e-53	-0.40715	0.517	0.716	1.34e-48	FB_2	Col8a1
Antxr1	6.08e-53	-0.265885	0.332	0.557	2.03e-48	FB_2	Antxr1
Lpar1	7.17e-52	-0.273296	0.4	0.631	2.4e-47	FB_2	Lpar1
Gls	1.19e-51	-0.250886	0.372	0.601	3.96e-47	FB_2	Gls
Lvrn.1	1.28e-51	0.887156	0.256	0.157	4.27e-47	FB_2	Lvrn
Zeb1	1.95e-51	-0.261658	0.833	0.954	6.51e-47	FB_2	Zeb1
Pcsk6.1	2.44e-51	-0.381268	0.533	0.743	8.15e-47	FB_2	Pcsk6
Raph1.1	2.67e-51	-0.316759	0.305	0.505	8.91e-47	FB_2	Raph1
Pard3b	3.99e-51	-0.268238	0.684	0.877	1.33e-46	FB_2	Pard3b
Mical2.1	7.46e-51	-0.435056	0.079	0.198	2.49e-46	FB_2	Mical2
Fam172a	1.66e-50	-0.257551	0.446	0.676	5.53e-46	FB_2	Fam172a
Aff3	2.19e-50	-0.302288	0.239	0.421	7.33e-46	FB_2	Aff3
Uap1.2	2.95e-50	-0.369246	0.094	0.221	9.84e-46	FB_2	Uap1
Rtn4	4.15e-50	-0.267485	0.251	0.439	1.39e-45	FB_2	Rtn4
Kdm6a.1	5.4e-50	-0.264121	0.167	0.33	1.81e-45	FB_2	Kdm6a
Fbxl7	8.76e-50	-0.301518	0.519	0.714	2.93e-45	FB_2	Fbxl7
Disp1	1.17e-49	-0.282142	0.119	0.259	3.9e-45	FB_2	Disp1
Flrt2.1	1.2e-49	-0.548643	0.061	0.168	4.03e-45	FB_2	Flrt2
Adam9	1.46e-49	-0.28385	0.125	0.268	4.89e-45	FB_2	Adam9
Phf21a	4.62e-49	-0.25474	0.46	0.697	1.54e-44	FB_2	Phf21a
Asap1	4.85e-49	-0.269616	0.513	0.751	1.62e-44	FB_2	Asap1
Klf3	6.67e-49	-0.279365	0.132	0.277	2.23e-44	FB_2	Klf3
Adamts12.1	1.21e-48	-0.333537	0.276	0.46	4.04e-44	FB_2	Adamts12
Foxp2	1.26e-48	-0.325457	0.567	0.772	4.2e-44	FB_2	Foxp2
Plekhg1	1.34e-48	-0.288986	0.186	0.35	4.48e-44	FB_2	Plekhg1
Dock10.1	2.91e-48	-0.297692	0.251	0.432	9.71e-44	FB_2	Dock10
Plxdc2.1	3.62e-48	-0.300881	0.769	0.914	1.21e-43	FB_2	Plxdc2
Prickle1	1.09e-47	-0.389015	0.178	0.329	3.65e-43	FB_2	Prickle1
Slco3a1.2	1.45e-47	-0.331639	0.168	0.32	4.83e-43	FB_2	Slco3a1
Spata6	2.26e-47	-0.272841	0.137	0.283	7.55e-43	FB_2	Spata6
Rasal2	2.92e-47	-0.293952	0.181	0.339	9.77e-43	FB_2	Rasal2
Lama4.1	4.16e-47	-0.2606	0.471	0.701	1.39e-42	FB_2	Lama4
Fut8	5.1e-47	-0.255179	0.207	0.38	1.7e-42	FB_2	Fut8
Prkg1.1	6.23e-47	-0.328107	0.577	0.747	2.08e-42	FB_2	Prkg1
Itga9.1	8.31e-47	-0.26101	0.201	0.369	2.78e-42	FB_2	Itga9
Cpeb1.1	1.48e-46	-0.252481	0.209	0.379	4.95e-42	FB_2	Cpeb1
Chn1	1.8e-46	-0.29689	0.147	0.292	6.01e-42	FB_2	Chn1
Pi16.1	3.87e-46	-0.426756	0.09	0.209	1.29e-41	FB_2	Pi16
Naaladl2	6.81e-46	-0.272369	0.515	0.714	2.27e-41	FB_2	Naaladl2
Grik2.1	9.89e-46	-0.432115	0.161	0.302	3.31e-41	FB_2	Grik2
Anxa2	1.12e-45	-0.270301	0.102	0.227	3.74e-41	FB_2	Anxa2
B4galt5	1.87e-45	-0.319873	0.056	0.157	6.25e-41	FB_2	B4galt5
Spopl	2.29e-45	-0.250227	0.114	0.245	7.67e-41	FB_2	Spopl
Fgf2	2.93e-45	-0.330736	0.064	0.169	9.79e-41	FB_2	Fgf2
Gucy1a2	4.7e-45	-0.269061	0.396	0.607	1.57e-40	FB_2	Gucy1a2
Morrbid.1	8.71e-45	-0.324576	0.327	0.502	2.91e-40	FB_2	Morrbid
Ntn4.1	1.26e-44	-0.348077	0.089	0.205	4.2e-40	FB_2	Ntn4
Col27a1.1	1.31e-44	-0.261664	0.108	0.235	4.37e-40	FB_2	Col27a1
Ddr2	1.38e-44	-0.252184	0.448	0.679	4.61e-40	FB_2	Ddr2
Memo1	1.56e-44	-0.255414	0.124	0.258	5.23e-40	FB_2	Memo1
Pls3	2.32e-44	-0.269513	0.105	0.23	7.77e-40	FB_2	Pls3
Axl.1	2.47e-44	-0.26843	0.292	0.481	8.24e-40	FB_2	Axl
Aspn.2	3.97e-44	-0.341621	0.071	0.177	1.33e-39	FB_2	Aspn
Utrn	1.27e-43	-0.268441	0.349	0.546	4.23e-39	FB_2	Utrn
Ppfia2.1	1.47e-43	-0.41591	0.07	0.174	4.9e-39	FB_2	Ppfia2
Fap.1	2.12e-43	-0.299977	0.289	0.467	7.09e-39	FB_2	Fap
Flnb	2.8e-43	-0.361731	0.071	0.176	9.35e-39	FB_2	Flnb
Nr6a1	2.91e-43	-0.268889	0.154	0.295	9.73e-39	FB_2	Nr6a1
Myh10	4.46e-43	-0.297102	0.065	0.168	1.49e-38	FB_2	Myh10
Negr1.2	6.94e-43	-0.319229	0.553	0.734	2.32e-38	FB_2	Negr1
Adgrd1.2	9.26e-43	-0.534184	0.12	0.239	3.09e-38	FB_2	Adgrd1
Inpp4b.1	1.55e-42	-0.691514	0.072	0.171	5.18e-38	FB_2	Inpp4b
Trhde.1	1.56e-42	-0.324697	0.155	0.291	5.22e-38	FB_2	Trhde
Ackr3.1	1.78e-42	-0.465739	0.047	0.137	5.96e-38	FB_2	Ackr3
Smad2	2.17e-42	-0.251118	0.081	0.192	7.27e-38	FB_2	Smad2
Adamtsl2	2.19e-42	-0.354062	0.065	0.165	7.33e-38	FB_2	Adamtsl2
Pcolce2	2.3e-42	-0.27279	0.128	0.258	7.68e-38	FB_2	Pcolce2
Galnt17	2.9e-41	-0.270323	0.171	0.315	9.7e-37	FB_2	Galnt17
Abca8b	4.13e-40	-0.282189	0.485	0.686	1.38e-35	FB_2	Abca8b
Ubash3b	1.49e-39	-0.347705	0.039	0.12	4.97e-35	FB_2	Ubash3b
C1qtnf7	3.99e-39	-0.25667	0.54	0.736	1.33e-34	FB_2	C1qtnf7
Kalrn	1.07e-38	-0.317528	0.059	0.151	3.57e-34	FB_2	Kalrn
Lsamp.2	1.4e-38	-0.373116	0.472	0.623	4.67e-34	FB_2	Lsamp
Loxl2	2.75e-38	-0.307137	0.042	0.124	9.2e-34	FB_2	Loxl2
Tiam1	3.77e-38	-0.257079	0.065	0.16	1.26e-33	FB_2	Tiam1
Map1b	4.62e-37	-0.327092	0.072	0.166	1.54e-32	FB_2	Map1b
Pbx3	2.32e-36	-0.255038	0.152	0.277	7.75e-32	FB_2	Pbx3
Ugdh.1	3.15e-34	-0.404311	0.058	0.142	1.05e-29	FB_2	Ugdh
Ranbp17	4.08e-34	-0.327154	0.073	0.163	1.36e-29	FB_2	Ranbp17
Man1a	5.25e-33	-0.25374	0.391	0.567	1.75e-28	FB_2	Man1a
Fbn1.1	2.19e-32	-0.35814	0.468	0.664	7.31e-28	FB_2	Fbn1
Adamts19	9.64e-32	-0.317976	0.041	0.112	3.22e-27	FB_2	Adamts19
Arhgef28.1	2.45e-31	-0.289042	0.063	0.145	8.2e-27	FB_2	Arhgef28
Adamts6	6e-31	-0.300561	0.088	0.179	2e-26	FB_2	Adamts6
Has2os	7.74e-31	-0.345046	0.034	0.101	2.59e-26	FB_2	Has2os
Npas3	2.02e-30	-0.274083	0.107	0.203	6.76e-26	FB_2	Npas3
Unc5c.2	2.49e-30	-0.418414	0.062	0.139	8.33e-26	FB_2	Unc5c
Ghr	6.3e-30	-0.252174	0.745	0.868	2.11e-25	FB_2	Ghr
Nhsl1.1	7.85e-30	-0.271569	0.056	0.131	2.62e-25	FB_2	Nhsl1
Kcnip1.1	1.86e-29	-0.430276	0.117	0.21	6.22e-25	FB_2	Kcnip1
CT025619.1.1	3.34e-29	-0.446764	0.043	0.108	1.12e-24	FB_2	CT025619.1
Gm34567.1	1.38e-27	-0.256491	0.04	0.104	4.61e-23	FB_2	Gm34567
Plxna4.2	2.97e-27	-0.392972	0.056	0.125	9.94e-23	FB_2	Plxna4
Aldh1a2.1	1.05e-26	-0.277013	0.075	0.152	3.5e-22	FB_2	Aldh1a2
Creb5.1	3.94e-26	-0.307547	0.383	0.525	1.32e-21	FB_2	Creb5
Dpep1.1	4.67e-26	0.555965	0.435	0.392	1.56e-21	FB_2	Dpep1
2010111I01Rik	5.63e-26	-0.453823	0.041	0.1	1.88e-21	FB_2	2010111I01Rik
Gm10800.1	2.76e-25	0.948534	0.142	0.087	9.21e-21	FB_2	Gm10800
Gm42418.2	3.92e-25	0.689442	0.785	0.76	1.31e-20	FB_2	Gm42418
Dapk1.1	2.61e-24	0.719646	0.353	0.301	8.74e-20	FB_2	Dapk1
Nkain2.1	2.25e-23	0.912207	0.258	0.188	7.51e-19	FB_2	Nkain2
Slit3.1	3.14e-22	0.584627	0.584	0.574	1.05e-17	FB_2	Slit3
Rbfox1	3.48e-22	-0.28408	0.168	0.263	1.16e-17	FB_2	Rbfox1
Tll2.1	3.5e-22	-0.282164	0.07	0.137	1.17e-17	FB_2	Tll2
Acss3.1	8.56e-22	0.647519	0.205	0.148	2.86e-17	FB_2	Acss3
Serpine1.2	1.71e-21	-0.287111	0.051	0.109	5.7e-17	FB_2	Serpine1
Epha7.1	3.1e-21	-0.274389	0.054	0.112	1.03e-16	FB_2	Epha7
Dpyd.1	4.07e-16	0.670433	0.238	0.191	1.36e-11	FB_2	Dpyd
Cox6a2.2	2.6e-13	0.742908	0.146	0.108	8.71e-09	FB_2	Cox6a2
Fmo2.1	1.79e-09	0.531409	0.239	0.211	6e-05	FB_2	Fmo2
Chrm3.2	4.02e-09	-0.297357	0.072	0.109	0.000134425	FB_2	Chrm3
Apoe.1	4.09e-08	0.54848	0.184	0.157	0.00136619	FB_2	Apoe
Pappa.1	5.54e-08	0.408595	0.125	0.096	0.00185272	FB_2	Pappa
Thsd7a	5.74e-07	0.304658	0.672	0.726	0.0191718	FB_2	Thsd7a
Tox.1	8.69e-07	0.526439	0.156	0.13	0.0290438	FB_2	Tox
Cyp27a1.1	6.18e-06	0.490392	0.326	0.337	0.206584	FB_2	Cyp27a1
Blnk.1	6.87e-06	0.418628	0.173	0.152	0.229562	FB_2	Blnk
Ggt5	8.18e-06	0.481411	0.205	0.189	0.273519	FB_2	Ggt5
Pdlim3.1	1.52e-05	0.355459	0.11	0.088	0.506548	FB_2	Pdlim3
Angpt1.1	1.94e-05	0.413257	0.37	0.372	0.64947	FB_2	Angpt1
Pid1	4.02e-05	0.274164	0.64	0.718	1	FB_2	Pid1
Zbtb16.2	5.57e-05	0.291302	0.559	0.624	1	FB_2	Zbtb16
Aldh1a1	7.57e-05	0.395267	0.535	0.609	1	FB_2	Aldh1a1
Cst3	0.000162667	0.533582	0.152	0.138	1	FB_2	Cst3
Cmss1.1	0.000180059	0.546893	0.556	0.597	1	FB_2	Cmss1
Eya2.1	0.000208297	0.477562	0.323	0.339	1	FB_2	Eya2
Cp	0.000785421	0.335754	0.437	0.476	1	FB_2	Cp
Spon1.1	0.000818464	0.353944	0.424	0.456	1	FB_2	Spon1
Fbn2.1	0.0014269	0.415185	0.106	0.091	1	FB_2	Fbn2
Ccn5.1	0.00175714	0.372432	0.109	0.095	1	FB_2	Ccn5
Uty.2	0.00216544	0.369089	0.149	0.138	1	FB_2	Uty
Sat1	0.0035278	0.251528	0.149	0.187	1	FB_2	Sat1
mt-Co1.1	0.0066888	0.674445	0.138	0.126	1	FB_2	mt-Co1
Erbb4	0	5.83295	0.515	0.001	0	FB_3	Erbb4
Pdzrn4	0	3.98656	0.331	0.001	0	FB_3	Pdzrn4
Kcnq5	0	3.33838	0.312	0.002	0	FB_3	Kcnq5
Plcb1	0	3.13918	0.588	0.026	0	FB_3	Plcb1
Kcnma1	0	3.01325	0.379	0.012	0	FB_3	Kcnma1
Sox6	0	2.97176	0.496	0.003	0	FB_3	Sox6
Dkk3	0	2.51337	0.482	0.031	0	FB_3	Dkk3
Pde4d	0	2.45737	0.228	0	0	FB_3	Pde4d
Cadm1	0	2.44796	0.415	0.011	0	FB_3	Cadm1
Ctnna3	0	2.38546	0.165	0	0	FB_3	Ctnna3
Hecw2	0	2.03218	0.426	0.021	0	FB_3	Hecw2
Rapgef4	0	1.25412	0.206	0.004	0	FB_3	Rapgef4
Rspo3	0	1.24398	0.158	0.001	0	FB_3	Rspo3
Wif1	0	1.21411	0.158	0	0	FB_3	Wif1
Rerg	0	1.19852	0.169	0.001	0	FB_3	Rerg
Nav2	0	1.04235	0.125	0	0	FB_3	Nav2
Lmcd1	0	0.947504	0.18	0.002	0	FB_3	Lmcd1
Sorbs1	3.2e-273	1.53635	0.188	0.004	1.07e-268	FB_3	Sorbs1
Fmod	1.51e-268	1.03928	0.151	0.002	5.05e-264	FB_3	Fmod
Cacnb2	3.19e-267	1.0079	0.118	0.001	1.07e-262	FB_3	Cacnb2
Prg4	4.36e-267	1.79079	0.221	0.006	1.46e-262	FB_3	Prg4
Ptprb	4.43e-266	1.28009	0.228	0.007	1.48e-261	FB_3	Ptprb
Tbx5	8.9e-251	0.634758	0.103	0.001	2.98e-246	FB_3	Tbx5
Comp	3.44e-245	1.34304	0.158	0.003	1.15e-240	FB_3	Comp
Trpm3	1.27e-244	1.78796	0.364	0.023	4.23e-240	FB_3	Trpm3
Epb41l4a	2.42e-219	0.828843	0.173	0.005	8.09e-215	FB_3	Epb41l4a
Piezo2	8.37e-215	1.90026	0.401	0.032	2.8e-210	FB_3	Piezo2
Aff2	7.71e-208	2.25959	0.445	0.041	2.58e-203	FB_3	Aff2
Rasgrf2	3.93e-200	0.707058	0.118	0.002	1.31e-195	FB_3	Rasgrf2
Runx1	1.45e-198	0.94657	0.165	0.005	4.86e-194	FB_3	Runx1
Postn	1.72e-186	2.41928	0.382	0.034	5.74e-182	FB_3	Postn
Pak3	1.83e-178	1.12442	0.176	0.006	6.1e-174	FB_3	Pak3
Limch1	3.93e-160	1.62437	0.287	0.022	1.31e-155	FB_3	Limch1
L3mbtl4	6.57e-160	1.0394	0.143	0.005	2.2e-155	FB_3	L3mbtl4
Prkch	1.25e-159	0.705266	0.132	0.004	4.19e-155	FB_3	Prkch
Dtna	1.32e-157	0.9736	0.176	0.008	4.42e-153	FB_3	Dtna
Flt1	2.04e-151	1.03472	0.14	0.005	6.8e-147	FB_3	Flt1
Ptpn13	1.07e-150	1.20714	0.301	0.025	3.58e-146	FB_3	Ptpn13
Stk17b	3.75e-148	1.52142	0.224	0.014	1.25e-143	FB_3	Stk17b
Tmtc2	4.52e-148	1.34864	0.206	0.012	1.51e-143	FB_3	Tmtc2
Shank3	2.03e-147	0.66529	0.151	0.006	6.78e-143	FB_3	Shank3
Kcnb2	5.84e-146	1.6219	0.11	0.003	1.95e-141	FB_3	Kcnb2
Retreg1	7.92e-142	0.452137	0.103	0.002	2.65e-137	FB_3	Retreg1
Hand2os1	1.76e-135	1.7786	0.357	0.041	5.89e-131	FB_3	Hand2os1
Enah	9.68e-135	0.989337	0.173	0.009	3.24e-130	FB_3	Enah
St6galnac3	3.53e-126	0.736742	0.114	0.004	1.18e-121	FB_3	St6galnac3
Etl4	1.46e-125	1.10361	0.206	0.014	4.88e-121	FB_3	Etl4
Erg	1.94e-122	0.452947	0.103	0.003	6.5e-118	FB_3	Erg
Sntg2	2.09e-122	1.38606	0.32	0.035	6.99e-118	FB_3	Sntg2
Cyyr1	7.36e-121	0.857588	0.107	0.003	2.46e-116	FB_3	Cyyr1
Col4a6	6.73e-119	1.75991	0.452	0.072	2.25e-114	FB_3	Col4a6
Unc13b	2.86e-114	1.45766	0.32	0.038	9.57e-110	FB_3	Unc13b
Samd12	8.52e-113	0.629995	0.107	0.004	2.85e-108	FB_3	Samd12
Gm4876	6.62e-106	0.852993	0.132	0.007	2.21e-101	FB_3	Gm4876
Kank1	9.79e-106	0.767246	0.176	0.012	3.27e-101	FB_3	Kank1
Pdlim3.2	1.36e-104	2.11245	0.467	0.086	4.53e-100	FB_3	Pdlim3
P3h2	2.82e-103	1.77212	0.312	0.04	9.41e-99	FB_3	P3h2
Smoc1	1.31e-101	0.624897	0.11	0.005	4.36e-97	FB_3	Smoc1
Hmcn1	1.68e-101	1.45824	0.261	0.029	5.6e-97	FB_3	Hmcn1
Nrxn1	9.76e-99	2.77213	0.151	0.01	3.26e-94	FB_3	Nrxn1
Lnx1	3.55e-98	0.703216	0.132	0.007	1.19e-93	FB_3	Lnx1
Kirrel3	3.11e-96	2.54943	0.294	0.039	1.04e-91	FB_3	Kirrel3
Adgrf5	1.57e-93	0.601238	0.132	0.008	5.25e-89	FB_3	Adgrf5
Tspan7	3.41e-92	1.01767	0.176	0.014	1.14e-87	FB_3	Tspan7
Fat4	9.31e-89	1.23525	0.283	0.038	3.11e-84	FB_3	Fat4
Pecam1	2.23e-88	0.906909	0.158	0.012	7.47e-84	FB_3	Pecam1
Mylk	2.39e-86	0.827773	0.114	0.006	7.99e-82	FB_3	Mylk
Ggta1	7.27e-84	0.483817	0.129	0.008	2.43e-79	FB_3	Ggta1
Myo1d	4.89e-83	1.64798	0.599	0.166	1.64e-78	FB_3	Myo1d
Galnt18	6.98e-83	1.20373	0.199	0.02	2.33e-78	FB_3	Galnt18
Fam78b	1.14e-82	1.48953	0.408	0.081	3.82e-78	FB_3	Fam78b
Npr1	1.98e-80	0.611484	0.147	0.011	6.62e-76	FB_3	Npr1
Fgd5	7.44e-80	0.803571	0.243	0.03	2.49e-75	FB_3	Fgd5
Crispld1	8.5e-78	0.744345	0.121	0.008	2.84e-73	FB_3	Crispld1
Iqgap2	9.43e-77	0.798319	0.143	0.011	3.15e-72	FB_3	Iqgap2
Ltbp2	1.39e-75	1.0371	0.173	0.017	4.63e-71	FB_3	Ltbp2
Smad6	1.83e-72	1.157	0.279	0.043	6.11e-68	FB_3	Smad6
Fry	7.82e-72	1.09762	0.221	0.028	2.61e-67	FB_3	Fry
Stk32b	1.38e-71	1.28083	0.239	0.033	4.61e-67	FB_3	Stk32b
Ptpn14	1.71e-71	1.11973	0.309	0.053	5.71e-67	FB_3	Ptpn14
4933406I18Rik	9.79e-71	1.1777	0.312	0.055	3.27e-66	FB_3	4933406I18Rik
Pkp4	1.97e-70	0.870244	0.173	0.018	6.59e-66	FB_3	Pkp4
Ppm1h	5.24e-68	0.654898	0.176	0.019	1.75e-63	FB_3	Ppm1h
Kitl	2.43e-67	1.21221	0.224	0.031	8.11e-63	FB_3	Kitl
Eva1c	2.2e-66	0.906159	0.188	0.022	7.37e-62	FB_3	Eva1c
Tanc2	1.61e-65	1.56521	0.651	0.236	5.37e-61	FB_3	Tanc2
Thrb.1	1.87e-65	1.90784	0.504	0.147	6.25e-61	FB_3	Thrb
Cdh11	8.98e-65	1.62777	0.357	0.077	3e-60	FB_3	Cdh11
Nhs	3.62e-64	1.58175	0.386	0.088	1.21e-59	FB_3	Nhs
Adgrl2	9.7e-64	1.07416	0.276	0.047	3.24e-59	FB_3	Adgrl2
Fign	1.49e-63	0.772812	0.129	0.011	4.98e-59	FB_3	Fign
Pde7b.2	8.78e-63	2.00875	0.599	0.215	2.94e-58	FB_3	Pde7b
1010001N08Rik.1	4.87e-62	1.53465	0.386	0.09	1.63e-57	FB_3	1010001N08Rik
Sncaip	1.3e-61	1.05019	0.25	0.04	4.35e-57	FB_3	Sncaip
Cttnbp2	3.49e-61	0.832746	0.165	0.019	1.17e-56	FB_3	Cttnbp2
Plxna4.3	5.24e-61	1.11256	0.426	0.104	1.75e-56	FB_3	Plxna4
Cd200	2.79e-60	0.62801	0.132	0.012	9.33e-56	FB_3	Cd200
Fli1	7.53e-60	1.30626	0.474	0.134	2.52e-55	FB_3	Fli1
Nkd1	2.43e-59	0.408501	0.11	0.009	8.11e-55	FB_3	Nkd1
Dock5	5.5e-59	0.825504	0.162	0.019	1.84e-54	FB_3	Dock5
Klhl29.1	9.47e-59	1.50768	0.423	0.112	3.17e-54	FB_3	Klhl29
Plce1.1	1.01e-57	1.52623	0.713	0.297	3.38e-53	FB_3	Plce1
Neo1	1.3e-57	0.92839	0.265	0.047	4.34e-53	FB_3	Neo1
Mical3	3.54e-57	0.938346	0.276	0.051	1.18e-52	FB_3	Mical3
Entpd1	2.35e-56	0.642798	0.103	0.008	7.86e-52	FB_3	Entpd1
Ncam1	1.35e-55	1.03557	0.195	0.028	4.5e-51	FB_3	Ncam1
Rarb	3.31e-55	1.08393	0.191	0.027	1.11e-50	FB_3	Rarb
Slc16a7	4.23e-55	0.711062	0.165	0.021	1.41e-50	FB_3	Slc16a7
Megf10	1.83e-54	0.771656	0.206	0.031	6.11e-50	FB_3	Megf10
Arhgap31	1.09e-53	1.31086	0.522	0.168	3.63e-49	FB_3	Arhgap31
Vwc2	1.63e-53	0.830196	0.103	0.008	5.44e-49	FB_3	Vwc2
Nhsl2	2.42e-52	0.67433	0.188	0.027	8.07e-48	FB_3	Nhsl2
Celf2	1.13e-51	-1.03194	0.93	0.968	3.77e-47	FB_3	Celf2
Rin2	2.1e-51	2.02188	0.654	0.264	7.01e-47	FB_3	Rin2
Unc5b	2.97e-51	0.914368	0.298	0.063	9.92e-47	FB_3	Unc5b
Dlgap1	3.21e-51	0.788165	0.129	0.014	1.07e-46	FB_3	Dlgap1
Myo18a	8.86e-51	0.445236	0.129	0.014	2.96e-46	FB_3	Myo18a
Ebf2	3.01e-50	-1.3485	0.39	0.851	1e-45	FB_3	Ebf2
Ppfibp2	2.36e-49	0.997311	0.305	0.069	7.9e-45	FB_3	Ppfibp2
Adamts6.1	1.6e-48	1.38729	0.474	0.153	5.36e-44	FB_3	Adamts6
Lamc1	8.62e-47	-1.32565	0.548	0.846	2.88e-42	FB_3	Lamc1
Arhgap26	9.77e-47	0.623837	0.11	0.011	3.26e-42	FB_3	Arhgap26
Atp2a2	3.05e-46	0.80657	0.132	0.016	1.02e-41	FB_3	Atp2a2
Magi1.1	1.08e-45	1.23909	0.434	0.134	3.62e-41	FB_3	Magi1
Igfbp5	1.36e-44	0.725895	0.129	0.015	4.56e-40	FB_3	Igfbp5
Smim3	1.71e-44	0.738997	0.165	0.025	5.72e-40	FB_3	Smim3
Ldb2	8.93e-43	0.92717	0.147	0.021	2.98e-38	FB_3	Ldb2
Itga10	2.18e-42	0.519802	0.11	0.012	7.28e-38	FB_3	Itga10
Acer2	1.68e-41	0.550554	0.154	0.023	5.63e-37	FB_3	Acer2
Mtss1	2.03e-41	0.496099	0.11	0.012	6.8e-37	FB_3	Mtss1
Pde3b	2.15e-41	1.12763	0.305	0.079	7.17e-37	FB_3	Pde3b
Slc2a13	5.62e-41	0.780509	0.235	0.049	1.88e-36	FB_3	Slc2a13
Dgkb	1.04e-40	1.24077	0.195	0.036	3.49e-36	FB_3	Dgkb
Myo7a	1.22e-39	0.462643	0.121	0.015	4.06e-35	FB_3	Myo7a
Rapgef3	4.96e-39	0.486061	0.158	0.025	1.66e-34	FB_3	Rapgef3
Arhgap24.2	5.18e-39	-1.65052	0.408	0.739	1.73e-34	FB_3	Arhgap24
Garem1	6.21e-39	0.837753	0.195	0.037	2.08e-34	FB_3	Garem1
Bicc1.2	9.37e-39	-0.983942	0.846	0.934	3.13e-34	FB_3	Bicc1
Grin3a	7.11e-38	0.852312	0.103	0.012	2.38e-33	FB_3	Grin3a
Zfp827	8.07e-38	0.432941	0.107	0.013	2.7e-33	FB_3	Zfp827
Pdzrn3	7.12e-37	1.47077	0.691	0.36	2.38e-32	FB_3	Pdzrn3
Kalrn.1	1.12e-36	0.957645	0.393	0.126	3.74e-32	FB_3	Kalrn
Sipa1l1	1.13e-36	0.883898	0.353	0.105	3.77e-32	FB_3	Sipa1l1
Pcdh9.1	1.73e-36	-1.02208	0.754	0.925	5.79e-32	FB_3	Pcdh9
Acot11	2.67e-36	0.562071	0.158	0.027	8.91e-32	FB_3	Acot11
Plcb4.1	9.18e-36	1.20218	0.654	0.333	3.07e-31	FB_3	Plcb4
Ptprk.1	1.11e-35	0.975693	0.471	0.171	3.7e-31	FB_3	Ptprk
Abca8a	2.77e-35	-0.959558	0.82	0.934	9.25e-31	FB_3	Abca8a
Mef2a	5.07e-35	1.02254	0.654	0.31	1.69e-30	FB_3	Mef2a
Col4a5	2.11e-34	1.16908	0.46	0.176	7.06e-30	FB_3	Col4a5
Pcsk6.2	4.1e-34	-1.3609	0.379	0.702	1.37e-29	FB_3	Pcsk6
Greb1l	1.09e-33	1.20771	0.632	0.311	3.65e-29	FB_3	Greb1l
Olfml2b	1.32e-33	0.435723	0.129	0.02	4.4e-29	FB_3	Olfml2b
Chst11	2.56e-33	0.557561	0.235	0.056	8.54e-29	FB_3	Chst11
Tmcc3	1.09e-32	1.15623	0.651	0.338	3.63e-28	FB_3	Tmcc3
Tmem132c	2.25e-32	0.77764	0.125	0.02	7.51e-28	FB_3	Tmem132c
Pitpnc1	7.19e-32	0.802046	0.202	0.046	2.4e-27	FB_3	Pitpnc1
Ppp1r13b	7.53e-32	0.589393	0.151	0.028	2.52e-27	FB_3	Ppp1r13b
Itpkb	9.81e-32	0.874452	0.441	0.164	3.28e-27	FB_3	Itpkb
Meox1	1.01e-31	0.656703	0.18	0.038	3.38e-27	FB_3	Meox1
Tnxb	1.04e-31	-1.11845	0.54	0.78	3.48e-27	FB_3	Tnxb
Cd44	3.17e-31	0.829735	0.217	0.054	1.06e-26	FB_3	Cd44
Synpo2	3.85e-31	1.06686	0.243	0.065	1.29e-26	FB_3	Synpo2
Ngf.1	1.04e-30	-1.38573	0.316	0.65	3.49e-26	FB_3	Ngf
Gpc6	1.17e-30	-0.772487	0.871	0.969	3.92e-26	FB_3	Gpc6
Nudt4	1.85e-30	0.419408	0.107	0.015	6.2e-26	FB_3	Nudt4
Zfhx4	2.25e-30	1.04845	0.276	0.081	7.52e-26	FB_3	Zfhx4
Nxn	2.95e-30	0.963776	0.676	0.36	9.87e-26	FB_3	Nxn
Smoc2.2	4.23e-30	-1.32086	0.294	0.64	1.41e-25	FB_3	Smoc2
Csrp2	4.99e-30	0.774173	0.199	0.047	1.67e-25	FB_3	Csrp2
Tjp1	1.66e-29	0.785696	0.43	0.162	5.55e-25	FB_3	Tjp1
Zfpm2.1	1.85e-29	-0.896613	0.754	0.893	6.2e-25	FB_3	Zfpm2
Thsd7a.1	1e-28	-1.33203	0.434	0.72	3.36e-24	FB_3	Thsd7a
Rai14	3.12e-28	0.595871	0.279	0.084	1.04e-23	FB_3	Rai14
Chrm3.3	4.44e-28	1.53882	0.298	0.097	1.48e-23	FB_3	Chrm3
Wwp2	4.53e-28	0.638904	0.279	0.082	1.52e-23	FB_3	Wwp2
Morrbid.2	5.77e-28	-1.65854	0.121	0.47	1.93e-23	FB_3	Morrbid
Car8	1.29e-27	0.513549	0.14	0.027	4.33e-23	FB_3	Car8
Syne1.1	1.5e-27	0.902407	0.699	0.383	5.02e-23	FB_3	Syne1
Trabd2b	3.05e-27	0.714268	0.158	0.034	1.02e-22	FB_3	Trabd2b
Adarb1.1	4.93e-27	0.950119	0.434	0.175	1.65e-22	FB_3	Adarb1
Rora	5.65e-27	-0.606993	0.982	0.98	1.89e-22	FB_3	Rora
Gm26870	6.19e-27	0.701734	0.169	0.038	2.07e-22	FB_3	Gm26870
Mef2c.1	8.54e-27	0.776707	0.382	0.142	2.85e-22	FB_3	Mef2c
Abi3bp	4.74e-26	1.63982	0.783	0.545	1.58e-21	FB_3	Abi3bp
Evl	1.03e-25	0.535963	0.184	0.045	3.45e-21	FB_3	Evl
Adgrl3.2	1.74e-25	-1.67314	0.195	0.492	5.8e-21	FB_3	Adgrl3
Ptprm.1	1.76e-25	0.991451	0.735	0.465	5.9e-21	FB_3	Ptprm
Scn7a	2.25e-25	-1.15348	0.371	0.634	7.5e-21	FB_3	Scn7a
Gtf2ird1	2.33e-25	0.483581	0.173	0.041	7.79e-21	FB_3	Gtf2ird1
Sgcd.1	2.37e-25	-1.29515	0.61	0.778	7.94e-21	FB_3	Sgcd
Unc5c.3	3.03e-25	1.20528	0.324	0.118	1.01e-20	FB_3	Unc5c
Lama2	3.25e-25	-0.664729	0.945	0.955	1.08e-20	FB_3	Lama2
2810403A07Rik	3.72e-25	0.386524	0.151	0.033	1.24e-20	FB_3	2810403A07Rik
mt-Co2	4.5e-25	1.12329	0.206	0.056	1.5e-20	FB_3	mt-Co2
Prelp	6.65e-25	0.971081	0.32	0.117	2.22e-20	FB_3	Prelp
Elk3	7.84e-25	0.654149	0.29	0.096	2.62e-20	FB_3	Elk3
Pamr1	1.32e-24	0.876985	0.221	0.064	4.41e-20	FB_3	Pamr1
Tiam2	1.39e-24	0.68038	0.217	0.062	4.64e-20	FB_3	Tiam2
Zfp423	1.47e-24	0.679057	0.342	0.124	4.91e-20	FB_3	Zfp423
Map1b.1	2.41e-24	1.18371	0.357	0.142	8.07e-20	FB_3	Map1b
Epha7.2	4.64e-24	0.938508	0.283	0.096	1.55e-19	FB_3	Epha7
Srgap3.1	7.11e-24	0.817245	0.364	0.14	2.38e-19	FB_3	Srgap3
Nr3c2	8.39e-24	0.81491	0.61	0.305	2.8e-19	FB_3	Nr3c2
Pygb	8.96e-24	0.487465	0.118	0.023	3e-19	FB_3	Pygb
Prickle1.1	1.16e-23	0.946316	0.574	0.291	3.87e-19	FB_3	Prickle1
Epha3	1.6e-23	0.873931	0.136	0.03	5.34e-19	FB_3	Epha3
Adamts15	2.37e-23	0.813553	0.213	0.063	7.92e-19	FB_3	Adamts15
Socs2	2.71e-23	0.918911	0.559	0.285	9.05e-19	FB_3	Socs2
Adamts5	2.76e-23	-1.34343	0.368	0.613	9.24e-19	FB_3	Adamts5
Slit3.2	4.29e-23	-1.44762	0.327	0.581	1.43e-18	FB_3	Slit3
Ank	4.45e-23	0.759644	0.18	0.047	1.49e-18	FB_3	Ank
Sntb1	6.17e-23	0.675617	0.125	0.026	2.06e-18	FB_3	Sntb1
Prkd1.1	7e-23	0.669134	0.327	0.119	2.34e-18	FB_3	Prkd1
Lmo4	7.12e-23	0.718983	0.29	0.102	2.38e-18	FB_3	Lmo4
Eya4	9.19e-23	0.706251	0.235	0.073	3.07e-18	FB_3	Eya4
Flrt2.2	1.1e-22	0.933449	0.357	0.141	3.68e-18	FB_3	Flrt2
Zfp462	1.7e-22	0.753269	0.404	0.169	5.67e-18	FB_3	Zfp462
Cemip2	4.1e-22	0.825432	0.151	0.037	1.37e-17	FB_3	Cemip2
Mgll	5.97e-22	0.751127	0.191	0.054	1.99e-17	FB_3	Mgll
Immp2l	7.45e-22	0.750857	0.202	0.059	2.49e-17	FB_3	Immp2l
Shroom2	7.52e-22	0.468117	0.107	0.02	2.51e-17	FB_3	Shroom2
Atrnl1	8.46e-22	-0.837434	0.625	0.802	2.83e-17	FB_3	Atrnl1
2010111I01Rik.1	2.52e-21	1.35684	0.243	0.084	8.43e-17	FB_3	2010111I01Rik
Chka	2.9e-21	0.472595	0.195	0.056	9.69e-17	FB_3	Chka
Ptpn4	3.12e-21	0.552389	0.235	0.075	1.04e-16	FB_3	Ptpn4
Rapgef5	3.2e-21	0.653445	0.268	0.093	1.07e-16	FB_3	Rapgef5
Synpo	7.09e-21	0.595598	0.25	0.084	2.37e-16	FB_3	Synpo
Ablim1.2	1.06e-20	0.73368	0.474	0.226	3.55e-16	FB_3	Ablim1
Gm6277	1.09e-20	0.803886	0.184	0.053	3.65e-16	FB_3	Gm6277
Tbc1d4.2	1.27e-20	0.677159	0.239	0.08	4.25e-16	FB_3	Tbc1d4
Ror1	2.56e-20	-1.0014	0.548	0.723	8.55e-16	FB_3	Ror1
Dpep1.2	2.83e-20	-1.37364	0.132	0.407	9.45e-16	FB_3	Dpep1
Errfi1	2.9e-20	-1.87837	0.21	0.459	9.69e-16	FB_3	Errfi1
Mkl2	4.07e-20	0.372074	0.14	0.034	1.36e-15	FB_3	Mkl2
Fxyd6	6.12e-20	0.554399	0.176	0.05	2.04e-15	FB_3	Fxyd6
Adam22	1.18e-19	0.426593	0.103	0.021	3.93e-15	FB_3	Adam22
Tnik	1.22e-19	-1.15415	0.312	0.557	4.07e-15	FB_3	Tnik
Gm21992	1.24e-19	0.422347	0.184	0.054	4.15e-15	FB_3	Gm21992
Camta1	2.22e-19	0.560838	0.217	0.07	7.42e-15	FB_3	Camta1
Ralgapa2	2.7e-19	0.648041	0.184	0.054	9.02e-15	FB_3	Ralgapa2
Mfhas1	2.8e-19	0.394225	0.232	0.076	9.37e-15	FB_3	Mfhas1
Mitf.2	2.83e-19	0.766923	0.243	0.086	9.46e-15	FB_3	Mitf
Plekhg5	2.85e-19	0.421189	0.129	0.03	9.53e-15	FB_3	Plekhg5
Ccdc80	3.48e-19	1.13014	0.577	0.344	1.16e-14	FB_3	Ccdc80
Shroom4	3.84e-19	0.601467	0.272	0.1	1.28e-14	FB_3	Shroom4
mt-Co3	5.36e-19	1.22263	0.206	0.067	1.79e-14	FB_3	mt-Co3
Actn1	5.87e-19	0.507323	0.191	0.058	1.96e-14	FB_3	Actn1
Col15a1.1	6.81e-19	-1.08353	0.426	0.619	2.28e-14	FB_3	Col15a1
Npas3.1	8.07e-19	0.869857	0.39	0.178	2.7e-14	FB_3	Npas3
Ablim3	1.08e-18	0.579684	0.191	0.059	3.62e-14	FB_3	Ablim3
Mecom	1.23e-18	0.659354	0.923	0.841	4.12e-14	FB_3	Mecom
Zeb1.1	1.4e-18	-0.626395	0.831	0.929	4.68e-14	FB_3	Zeb1
Ankrd28	1.46e-18	0.649687	0.456	0.213	4.89e-14	FB_3	Ankrd28
Frmd4b	1.6e-18	0.689385	0.592	0.322	5.34e-14	FB_3	Frmd4b
Foxp2.1	1.62e-18	0.887577	0.86	0.725	5.4e-14	FB_3	Foxp2
Notch1	2.39e-18	0.355693	0.132	0.033	7.98e-14	FB_3	Notch1
Chsy1	3.03e-18	0.778813	0.243	0.088	1.01e-13	FB_3	Chsy1
Etv1	3.11e-18	0.596129	0.452	0.216	1.04e-13	FB_3	Etv1
Meis2	3.35e-18	1.02008	0.71	0.46	1.12e-13	FB_3	Meis2
Smurf2.1	3.76e-18	0.688761	0.688	0.403	1.26e-13	FB_3	Smurf2
Hif1a	4.79e-18	0.446819	0.162	0.046	1.6e-13	FB_3	Hif1a
Gpsm1	5.18e-18	0.503161	0.228	0.079	1.73e-13	FB_3	Gpsm1
Tgfbi	5.53e-18	0.572866	0.143	0.039	1.85e-13	FB_3	Tgfbi
Phkg1	5.59e-18	0.48592	0.118	0.028	1.87e-13	FB_3	Phkg1
Slc6a6	6.14e-18	0.488811	0.188	0.058	2.05e-13	FB_3	Slc6a6
Aig1	6.48e-18	0.636605	0.419	0.195	2.16e-13	FB_3	Aig1
Nuak1	1.12e-17	0.31656	0.129	0.032	3.73e-13	FB_3	Nuak1
Zranb3	1.4e-17	0.422058	0.125	0.031	4.69e-13	FB_3	Zranb3
Gm12394	1.65e-17	0.393456	0.143	0.039	5.52e-13	FB_3	Gm12394
Scara3	2.28e-17	0.329569	0.103	0.023	7.64e-13	FB_3	Scara3
Cntfr	2.64e-17	0.421495	0.165	0.049	8.81e-13	FB_3	Cntfr
Foxn3	2.77e-17	0.542368	0.702	0.419	9.27e-13	FB_3	Foxn3
9330159F19Rik	2.83e-17	0.574402	0.158	0.046	9.46e-13	FB_3	9330159F19Rik
Slc44a2	3.1e-17	0.315636	0.232	0.08	1.04e-12	FB_3	Slc44a2
Tbx20.1	4.1e-17	1.2955	0.765	0.566	1.37e-12	FB_3	Tbx20
Mgp	5.72e-17	1.02018	0.643	0.416	1.91e-12	FB_3	Mgp
Fam3c	6.16e-17	0.367468	0.169	0.051	2.06e-12	FB_3	Fam3c
Ctnna1.1	7.33e-17	0.438634	0.371	0.163	2.45e-12	FB_3	Ctnna1
Spats2l	8.13e-17	0.599648	0.364	0.162	2.72e-12	FB_3	Spats2l
Gm20388	8.85e-17	0.536271	0.202	0.069	2.96e-12	FB_3	Gm20388
Fam208a	9.83e-17	0.544094	0.202	0.069	3.29e-12	FB_3	Fam208a
Slc1a5	1.02e-16	-1.02198	0.29	0.513	3.41e-12	FB_3	Slc1a5
Tns1.1	1.1e-16	0.515291	0.496	0.25	3.69e-12	FB_3	Tns1
Iqsec1	1.44e-16	0.385691	0.195	0.065	4.8e-12	FB_3	Iqsec1
Ddx5.1	1.48e-16	0.570062	0.739	0.466	4.95e-12	FB_3	Ddx5
Sept11.1	1.75e-16	-1.0448	0.353	0.544	5.86e-12	FB_3	Sept11
Myrip	1.85e-16	0.435701	0.268	0.104	6.18e-12	FB_3	Myrip
Gm44511	2.03e-16	0.450199	0.21	0.074	6.8e-12	FB_3	Gm44511
Mical2.2	2.56e-16	0.77564	0.36	0.169	8.55e-12	FB_3	Mical2
Chpt1	2.59e-16	0.44562	0.14	0.039	8.67e-12	FB_3	Chpt1
Ephb4	3.32e-16	0.297326	0.14	0.039	1.11e-11	FB_3	Ephb4
Gm26804	5.34e-16	0.287944	0.129	0.035	1.78e-11	FB_3	Gm26804
Hipk2	6.53e-16	0.378663	0.25	0.094	2.18e-11	FB_3	Hipk2
Prex2	6.92e-16	-0.741614	0.526	0.73	2.31e-11	FB_3	Prex2
Aopep	8.49e-16	1.03602	0.618	0.441	2.84e-11	FB_3	Aopep
Myh10.1	9.02e-16	0.514067	0.324	0.142	3.01e-11	FB_3	Myh10
Gm26760	9.04e-16	0.434074	0.151	0.045	3.02e-11	FB_3	Gm26760
Gpr39	1.01e-15	0.613191	0.239	0.091	3.36e-11	FB_3	Gpr39
Scara5.1	2.13e-15	-1.25439	0.191	0.405	7.12e-11	FB_3	Scara5
Sox5	2.19e-15	-0.555369	0.864	0.9	7.31e-11	FB_3	Sox5
Rabgap1l	2.35e-15	0.50731	0.739	0.472	7.87e-11	FB_3	Rabgap1l
CT025619.1.2	2.61e-15	0.785924	0.232	0.091	8.73e-11	FB_3	CT025619.1
Iigp1	2.96e-15	0.479569	0.114	0.029	9.89e-11	FB_3	Iigp1
Pdgfra	3.41e-15	-1.00756	0.349	0.534	1.14e-10	FB_3	Pdgfra
2410089E03Rik	4.34e-15	0.309714	0.158	0.05	1.45e-10	FB_3	2410089E03Rik
Zmiz1	5.62e-15	0.494677	0.522	0.281	1.88e-10	FB_3	Zmiz1
Ar.1	5.81e-15	-0.990056	0.349	0.543	1.94e-10	FB_3	Ar
Col8a1.2	5.85e-15	-0.937711	0.485	0.676	1.95e-10	FB_3	Col8a1
mt-Nd2.2	6.52e-15	0.61257	0.243	0.097	2.18e-10	FB_3	mt-Nd2
Pdgfd	6.68e-15	0.69045	0.254	0.104	2.23e-10	FB_3	Pdgfd
Jcad	8.05e-15	0.309973	0.199	0.069	2.69e-10	FB_3	Jcad
Heg1	1.29e-14	-0.674008	0.607	0.748	4.31e-10	FB_3	Heg1
Tspan12	1.34e-14	0.428906	0.199	0.071	4.49e-10	FB_3	Tspan12
mt-Co1.2	1.37e-14	0.914374	0.283	0.126	4.57e-10	FB_3	mt-Co1
Gfra1.1	1.46e-14	-1.42043	0.165	0.369	4.88e-10	FB_3	Gfra1
P2rx7	1.64e-14	0.378697	0.195	0.069	5.47e-10	FB_3	P2rx7
Atp8b1.1	1.81e-14	-1.03831	0.342	0.522	6.05e-10	FB_3	Atp8b1
Elmo1	1.96e-14	0.628602	0.846	0.671	6.56e-10	FB_3	Elmo1
Phldb2	3.26e-14	0.420043	0.401	0.194	1.09e-09	FB_3	Phldb2
Ccnd2	3.34e-14	0.298003	0.151	0.047	1.12e-09	FB_3	Ccnd2
Magi2	3.45e-14	0.717796	0.691	0.48	1.15e-09	FB_3	Magi2
Rbms1	3.65e-14	-0.59593	0.732	0.838	1.22e-09	FB_3	Rbms1
Svep1	3.92e-14	-1.13199	0.25	0.458	1.31e-09	FB_3	Svep1
Cpeb2	4.2e-14	0.472611	0.143	0.045	1.4e-09	FB_3	Cpeb2
Ppp3ca	4.67e-14	0.636438	0.801	0.605	1.56e-09	FB_3	Ppp3ca
Kidins220.1	4.79e-14	0.49063	0.301	0.134	1.6e-09	FB_3	Kidins220
mt-Atp6.2	5.22e-14	1.05083	0.206	0.08	1.74e-09	FB_3	mt-Atp6
Tpk1	5.73e-14	0.549706	0.217	0.084	1.92e-09	FB_3	Tpk1
Slc4a4	6.16e-14	0.447887	0.162	0.054	2.06e-09	FB_3	Slc4a4
Zfp532	6.4e-14	0.48152	0.434	0.223	2.14e-09	FB_3	Zfp532
Setbp1	7.57e-14	0.572797	0.868	0.669	2.53e-09	FB_3	Setbp1
Mid2	7.73e-14	0.489025	0.279	0.121	2.58e-09	FB_3	Mid2
Pdgfrl	7.79e-14	0.441537	0.184	0.066	2.6e-09	FB_3	Pdgfrl
Afdn	8.05e-14	0.474686	0.518	0.288	2.69e-09	FB_3	Afdn
St3gal4.2	8.99e-14	0.815468	0.61	0.405	3e-09	FB_3	St3gal4
Il31ra.1	1.13e-13	0.683913	0.272	0.122	3.77e-09	FB_3	Il31ra
Mfap4	1.23e-13	0.546109	0.199	0.075	4.11e-09	FB_3	Mfap4
Hdac4	1.34e-13	0.32463	0.364	0.17	4.49e-09	FB_3	Hdac4
Plekhm2.1	1.35e-13	0.601228	0.279	0.124	4.52e-09	FB_3	Plekhm2
Slc7a2	1.36e-13	0.443518	0.191	0.071	4.56e-09	FB_3	Slc7a2
Cfh	1.51e-13	0.695978	0.79	0.596	5.04e-09	FB_3	Cfh
Fchsd2	1.63e-13	0.550393	0.654	0.393	5.45e-09	FB_3	Fchsd2
Fnip2	1.75e-13	0.388687	0.261	0.109	5.87e-09	FB_3	Fnip2
Itih5	1.79e-13	0.741699	0.305	0.141	6e-09	FB_3	Itih5
Gata6	1.82e-13	0.398669	0.294	0.13	6.09e-09	FB_3	Gata6
Cyth1	2.26e-13	0.322093	0.213	0.082	7.56e-09	FB_3	Cyth1
Sulf1.2	2.31e-13	-0.83479	0.522	0.647	7.74e-09	FB_3	Sulf1
Dennd5b	2.67e-13	0.477202	0.305	0.138	8.94e-09	FB_3	Dennd5b
4930578G10Rik	2.72e-13	0.826863	0.191	0.073	9.1e-09	FB_3	4930578G10Rik
Glul	3.01e-13	0.504604	0.176	0.063	1.01e-08	FB_3	Glul
Specc1	3.59e-13	0.385209	0.147	0.048	1.2e-08	FB_3	Specc1
Sorbs3	3.59e-13	0.344127	0.287	0.125	1.2e-08	FB_3	Sorbs3
Selenop	3.82e-13	0.528142	0.217	0.086	1.28e-08	FB_3	Selenop
Upf1	4.21e-13	0.26243	0.136	0.042	1.41e-08	FB_3	Upf1
Prkg1.2	4.32e-13	0.729837	0.835	0.707	1.45e-08	FB_3	Prkg1
Egfr	5.35e-13	-0.874124	0.54	0.661	1.79e-08	FB_3	Egfr
Rgs3	5.54e-13	0.42916	0.121	0.036	1.85e-08	FB_3	Rgs3
Adgra3	6.3e-13	0.341876	0.224	0.09	2.11e-08	FB_3	Adgra3
Dhrs3	7.78e-13	0.401657	0.169	0.06	2.6e-08	FB_3	Dhrs3
Slc43a3.1	9.76e-13	-0.957076	0.449	0.575	3.26e-08	FB_3	Slc43a3
Pik3r3	1.01e-12	0.379153	0.103	0.028	3.37e-08	FB_3	Pik3r3
Adamts19.1	1.03e-12	1.19296	0.221	0.094	3.44e-08	FB_3	Adamts19
Gpcpd1	1.13e-12	0.4885	0.301	0.14	3.76e-08	FB_3	Gpcpd1
Nox4	1.17e-12	0.747148	0.441	0.24	3.92e-08	FB_3	Nox4
Adipor2	1.28e-12	0.517085	0.176	0.065	4.29e-08	FB_3	Adipor2
Cachd1	1.46e-12	0.489317	0.364	0.182	4.89e-08	FB_3	Cachd1
Gm48099.2	1.64e-12	0.428418	0.243	0.104	5.5e-08	FB_3	Gm48099
Fam135a	1.8e-12	0.371968	0.412	0.207	6.03e-08	FB_3	Fam135a
Arhgap28	1.87e-12	0.507862	0.419	0.22	6.26e-08	FB_3	Arhgap28
Akap12.1	1.92e-12	-0.99219	0.232	0.42	6.41e-08	FB_3	Akap12
Nrbp2	1.99e-12	0.361957	0.191	0.073	6.66e-08	FB_3	Nrbp2
Airn	2e-12	-0.626156	0.654	0.797	6.69e-08	FB_3	Airn
Mertk	2.09e-12	0.324344	0.202	0.079	6.97e-08	FB_3	Mertk
Apbb2	2.15e-12	0.619109	0.493	0.295	7.17e-08	FB_3	Apbb2
Lrrk2	2.2e-12	0.438559	0.335	0.164	7.37e-08	FB_3	Lrrk2
Ebf3	2.67e-12	-0.956895	0.254	0.431	8.91e-08	FB_3	Ebf3
Nid1	2.73e-12	-0.904613	0.371	0.519	9.13e-08	FB_3	Nid1
Cnnm2	2.78e-12	0.363726	0.162	0.058	9.28e-08	FB_3	Cnnm2
Klf12.1	2.86e-12	0.495727	0.688	0.461	9.55e-08	FB_3	Klf12
Gramd1c	3.08e-12	0.423017	0.107	0.031	1.03e-07	FB_3	Gramd1c
Zcchc11	3.67e-12	0.336638	0.158	0.056	1.23e-07	FB_3	Zcchc11
Tspan18	3.83e-12	0.528621	0.154	0.055	1.28e-07	FB_3	Tspan18
Man1a.1	3.89e-12	-0.977116	0.386	0.531	1.3e-07	FB_3	Man1a
Ssh2	4.18e-12	-0.728104	0.574	0.702	1.4e-07	FB_3	Ssh2
Dtd1	4.68e-12	0.332393	0.176	0.066	1.56e-07	FB_3	Dtd1
Gnai1	6.07e-12	0.26429	0.147	0.05	2.03e-07	FB_3	Gnai1
Fndc3b	6.46e-12	-0.531419	0.779	0.829	2.16e-07	FB_3	Fndc3b
Eng	6.52e-12	0.523899	0.331	0.163	2.18e-07	FB_3	Eng
Dopey2	6.86e-12	0.266145	0.103	0.03	2.29e-07	FB_3	Dopey2
Dyrk1a	7.19e-12	0.428	0.533	0.304	2.4e-07	FB_3	Dyrk1a
Msi2.2	9.27e-12	0.547752	0.625	0.422	3.1e-07	FB_3	Msi2
Lrrc8c	9.77e-12	0.466128	0.254	0.114	3.27e-07	FB_3	Lrrc8c
Plod2	1.03e-11	0.521879	0.463	0.255	3.44e-07	FB_3	Plod2
Rnf130	1.1e-11	0.33399	0.239	0.103	3.67e-07	FB_3	Rnf130
Phc2	1.19e-11	0.31442	0.162	0.059	3.99e-07	FB_3	Phc2
Adamtsl1.2	1.22e-11	0.435479	0.224	0.097	4.07e-07	FB_3	Adamtsl1
Sgip1	1.24e-11	0.506531	0.32	0.157	4.15e-07	FB_3	Sgip1
Sdc2	1.4e-11	-0.651366	0.555	0.675	4.67e-07	FB_3	Sdc2
Jam2	1.4e-11	0.306457	0.154	0.055	4.68e-07	FB_3	Jam2
Atp11c	1.44e-11	0.406787	0.412	0.219	4.82e-07	FB_3	Atp11c
Egr1.1	1.54e-11	-1.10908	0.162	0.347	5.13e-07	FB_3	Egr1
Mid1	1.63e-11	-0.812205	0.559	0.665	5.46e-07	FB_3	Mid1
Itga1	1.65e-11	0.378512	0.338	0.167	5.52e-07	FB_3	Itga1
Trerf1	1.73e-11	-0.910105	0.25	0.43	5.79e-07	FB_3	Trerf1
Ppp1r12b.1	2.64e-11	0.577219	0.438	0.253	8.81e-07	FB_3	Ppp1r12b
Epas1	2.69e-11	0.440407	0.327	0.164	8.98e-07	FB_3	Epas1
Fibin	2.9e-11	0.430759	0.188	0.076	9.71e-07	FB_3	Fibin
Itga8	3.15e-11	0.633252	0.327	0.169	1.05e-06	FB_3	Itga8
2610307P16Rik.1	3.79e-11	0.43865	0.173	0.067	1.27e-06	FB_3	2610307P16Rik
Pls3.1	3.83e-11	0.683472	0.375	0.199	1.28e-06	FB_3	Pls3
Phf24	4.06e-11	0.490182	0.147	0.054	1.36e-06	FB_3	Phf24
Ms4a4d	4.12e-11	-0.93853	0.14	0.308	1.38e-06	FB_3	Ms4a4d
Abca6	4.19e-11	-0.946066	0.412	0.552	1.4e-06	FB_3	Abca6
Nkain3	4.37e-11	0.71486	0.147	0.054	1.46e-06	FB_3	Nkain3
Xpr1	4.5e-11	0.422101	0.32	0.155	1.5e-06	FB_3	Xpr1
Chchd3.1	4.58e-11	0.388383	0.346	0.176	1.53e-06	FB_3	Chchd3
Ccdc50	5.2e-11	0.418047	0.415	0.228	1.74e-06	FB_3	Ccdc50
Bri3	5.65e-11	0.296189	0.184	0.073	1.89e-06	FB_3	Bri3
Hmcn2	5.77e-11	-1.23713	0.18	0.354	1.93e-06	FB_3	Hmcn2
Naca	6.12e-11	0.26057	0.103	0.031	2.05e-06	FB_3	Naca
Col4a1	7.01e-11	-0.995168	0.346	0.493	2.34e-06	FB_3	Col4a1
mt-Nd1	7.11e-11	0.414932	0.121	0.04	2.38e-06	FB_3	mt-Nd1
Ralgapa1	7.15e-11	0.43222	0.651	0.421	2.39e-06	FB_3	Ralgapa1
Fbxw17	7.96e-11	0.305893	0.143	0.052	2.66e-06	FB_3	Fbxw17
Zufsp	7.97e-11	0.27467	0.118	0.038	2.67e-06	FB_3	Zufsp
Il11ra1	8e-11	0.357762	0.143	0.052	2.67e-06	FB_3	Il11ra1
Dock6	9.23e-11	0.411248	0.294	0.143	3.08e-06	FB_3	Dock6
Tfdp2.1	9.74e-11	0.355752	0.283	0.135	3.25e-06	FB_3	Tfdp2
Mbnl1	9.93e-11	0.609365	0.732	0.546	3.32e-06	FB_3	Mbnl1
Prkd2	1.05e-10	0.262996	0.154	0.058	3.5e-06	FB_3	Prkd2
Gata4	1.18e-10	0.662578	0.478	0.296	3.95e-06	FB_3	Gata4
Rab11fip3	1.21e-10	0.266157	0.287	0.136	4.04e-06	FB_3	Rab11fip3
Gm38399	1.24e-10	0.32392	0.114	0.037	4.14e-06	FB_3	Gm38399
Lcorl	1.26e-10	0.372542	0.279	0.135	4.2e-06	FB_3	Lcorl
Acvr1	1.3e-10	0.431865	0.43	0.243	4.33e-06	FB_3	Acvr1
Mast4.1	1.36e-10	-0.464437	0.901	0.924	4.54e-06	FB_3	Mast4
Cdk5rap2	1.4e-10	0.370777	0.272	0.13	4.69e-06	FB_3	Cdk5rap2
Lrrk1	1.64e-10	0.57403	0.713	0.507	5.49e-06	FB_3	Lrrk1
Ptn	1.65e-10	0.51152	0.165	0.065	5.5e-06	FB_3	Ptn
Rnf150	1.69e-10	-1.01745	0.283	0.429	5.65e-06	FB_3	Rnf150
Inpp5a	1.75e-10	0.285582	0.309	0.151	5.86e-06	FB_3	Inpp5a
Ifi207.1	1.79e-10	-1.09601	0.103	0.262	5.98e-06	FB_3	Ifi207
Wls	1.81e-10	0.428528	0.493	0.284	6.04e-06	FB_3	Wls
Dnmt3a	1.89e-10	0.275982	0.39	0.203	6.32e-06	FB_3	Dnmt3a
Robo1.2	1.98e-10	0.595676	0.596	0.4	6.62e-06	FB_3	Robo1
Map4k4	2.09e-10	0.369909	0.603	0.372	6.98e-06	FB_3	Map4k4
Sdc3	2.19e-10	0.384246	0.118	0.04	7.33e-06	FB_3	Sdc3
Ltbp3	2.34e-10	0.393475	0.243	0.112	7.83e-06	FB_3	Ltbp3
Dock9	2.36e-10	0.496343	0.375	0.207	7.87e-06	FB_3	Dock9
Gm26827	2.47e-10	0.575619	0.154	0.06	8.25e-06	FB_3	Gm26827
Amy1	2.49e-10	0.371982	0.221	0.098	8.32e-06	FB_3	Amy1
Ccdc157	2.51e-10	0.334031	0.202	0.086	8.4e-06	FB_3	Ccdc157
Arhgef7	2.59e-10	0.397505	0.158	0.062	8.64e-06	FB_3	Arhgef7
Arid5b	2.7e-10	0.407202	0.415	0.237	9.04e-06	FB_3	Arid5b
mt-Nd5.1	2.82e-10	0.32887	0.239	0.109	9.44e-06	FB_3	mt-Nd5
Gria3.1	2.87e-10	0.371033	0.357	0.189	9.59e-06	FB_3	Gria3
Gm2163	2.92e-10	0.4995	0.125	0.044	9.75e-06	FB_3	Gm2163
Oxct1	3.21e-10	0.321683	0.246	0.114	1.07e-05	FB_3	Oxct1
Bicd1	3.31e-10	0.446626	0.224	0.102	1.11e-05	FB_3	Bicd1
Zfp608	3.63e-10	0.383351	0.404	0.225	1.21e-05	FB_3	Zfp608
Adap2	3.89e-10	-0.987465	0.188	0.357	1.3e-05	FB_3	Adap2
Gpm6b	4.06e-10	-0.739612	0.555	0.651	1.36e-05	FB_3	Gpm6b
Yes1	4.6e-10	0.323901	0.199	0.085	1.54e-05	FB_3	Yes1
Phactr1	4.63e-10	0.448756	0.496	0.306	1.55e-05	FB_3	Phactr1
Tbl1xr1	4.93e-10	0.357773	0.507	0.297	1.65e-05	FB_3	Tbl1xr1
Abca9	5.02e-10	-0.822361	0.316	0.467	1.68e-05	FB_3	Abca9
Usp47	5.1e-10	0.39698	0.548	0.34	1.7e-05	FB_3	Usp47
Lamb1.1	5.66e-10	-0.863926	0.195	0.358	1.89e-05	FB_3	Lamb1
Tacc2	6.26e-10	0.293893	0.136	0.05	2.09e-05	FB_3	Tacc2
Pde3a	6.91e-10	0.729655	0.669	0.495	2.31e-05	FB_3	Pde3a
Cdkl5	7.06e-10	0.324608	0.103	0.033	2.36e-05	FB_3	Cdkl5
Chn2	7.66e-10	0.315185	0.14	0.053	2.56e-05	FB_3	Chn2
Cp.1	8.39e-10	-1.06624	0.338	0.469	2.8e-05	FB_3	Cp
Cep85l	8.48e-10	0.362308	0.342	0.179	2.83e-05	FB_3	Cep85l
Prpf40b	8.55e-10	0.325829	0.165	0.067	2.86e-05	FB_3	Prpf40b
Wnk1	8.6e-10	0.387471	0.706	0.472	2.87e-05	FB_3	Wnk1
Mtus1	8.64e-10	0.343336	0.202	0.089	2.89e-05	FB_3	Mtus1
Il16.1	9.79e-10	0.419002	0.32	0.171	3.27e-05	FB_3	Il16
Tcte2	1.06e-09	0.325898	0.114	0.039	3.55e-05	FB_3	Tcte2
Foxo1	1.1e-09	0.398036	0.511	0.311	3.69e-05	FB_3	Foxo1
Glis3	1.14e-09	-0.823241	0.243	0.408	3.81e-05	FB_3	Glis3
Ddr2.1	1.16e-09	-0.681759	0.562	0.629	3.86e-05	FB_3	Ddr2
Atg4a	1.21e-09	0.280972	0.121	0.043	4.04e-05	FB_3	Atg4a
Garnl3	1.24e-09	0.569746	0.335	0.186	4.15e-05	FB_3	Garnl3
Camk2d	1.25e-09	0.45144	0.632	0.429	4.17e-05	FB_3	Camk2d
Lysmd4.1	1.29e-09	0.27232	0.221	0.1	4.32e-05	FB_3	Lysmd4
Slit2.1	1.45e-09	-0.732288	0.353	0.517	4.86e-05	FB_3	Slit2
Notch2	1.49e-09	0.301457	0.426	0.236	4.96e-05	FB_3	Notch2
Fgf2.1	1.5e-09	0.429079	0.283	0.143	5.02e-05	FB_3	Fgf2
Osbpl10	1.55e-09	0.271556	0.114	0.039	5.17e-05	FB_3	Osbpl10
Col5a2	1.58e-09	0.578212	0.805	0.609	5.28e-05	FB_3	Col5a2
Ror2	1.6e-09	-0.904712	0.25	0.394	5.33e-05	FB_3	Ror2
Tgfbr1	1.64e-09	0.527136	0.463	0.28	5.49e-05	FB_3	Tgfbr1
Slf1	1.86e-09	0.39276	0.195	0.086	6.21e-05	FB_3	Slf1
Abr	1.89e-09	0.364567	0.162	0.067	6.3e-05	FB_3	Abr
Pmepa1	1.89e-09	0.580779	0.452	0.281	6.31e-05	FB_3	Pmepa1
Sned1.2	1.98e-09	0.319116	0.217	0.1	6.61e-05	FB_3	Sned1
Fmo1.1	2e-09	0.269003	0.243	0.114	6.67e-05	FB_3	Fmo1
Acyp2.2	2.08e-09	0.288585	0.39	0.216	6.96e-05	FB_3	Acyp2
Stk39	2.09e-09	0.591328	0.364	0.21	7e-05	FB_3	Stk39
Mpzl1	2.1e-09	0.257478	0.169	0.069	7.01e-05	FB_3	Mpzl1
Phactr2.1	2.15e-09	0.292627	0.199	0.088	7.17e-05	FB_3	Phactr2
Slc20a2	2.25e-09	0.298817	0.129	0.048	7.53e-05	FB_3	Slc20a2
Myo1e	2.3e-09	0.351443	0.349	0.187	7.7e-05	FB_3	Myo1e
Gm26992.1	2.33e-09	0.523193	0.136	0.053	7.78e-05	FB_3	Gm26992
Ddi2	2.41e-09	0.502806	0.43	0.252	8.07e-05	FB_3	Ddi2
Eya2.2	2.42e-09	-0.886214	0.184	0.338	8.08e-05	FB_3	Eya2
Lhfpl2	2.53e-09	0.27403	0.239	0.113	8.47e-05	FB_3	Lhfpl2
Bach2	2.98e-09	0.565553	0.43	0.262	9.96e-05	FB_3	Bach2
Stard8	2.98e-09	0.279857	0.151	0.06	9.96e-05	FB_3	Stard8
Nav1	3.15e-09	-0.567449	0.669	0.733	0.000105363	FB_3	Nav1
Gm26561	3.55e-09	0.305636	0.154	0.063	0.000118604	FB_3	Gm26561
Nup50	3.61e-09	0.260582	0.129	0.048	0.000120585	FB_3	Nup50
Bmp6	3.91e-09	-0.924105	0.254	0.408	0.000130773	FB_3	Bmp6
Cd9	4.01e-09	0.256091	0.191	0.085	0.000134054	FB_3	Cd9
Dlg2.1	4.28e-09	0.539804	0.478	0.302	0.000143047	FB_3	Dlg2
Sh3rf1	4.32e-09	0.395589	0.599	0.382	0.000144295	FB_3	Sh3rf1
Frzb	4.39e-09	0.420349	0.169	0.072	0.000146807	FB_3	Frzb
Daam2	4.58e-09	0.348177	0.103	0.035	0.000153157	FB_3	Daam2
Qk.2	4.73e-09	0.356709	0.445	0.261	0.000158105	FB_3	Qk
Clpb	5.01e-09	0.278628	0.176	0.076	0.000167322	FB_3	Clpb
Hip1	5.29e-09	0.416263	0.559	0.357	0.000176682	FB_3	Hip1
Mgat4a	5.72e-09	0.27666	0.154	0.063	0.000191081	FB_3	Mgat4a
Ccn1	5.72e-09	-1.17023	0.062	0.206	0.000191117	FB_3	Ccn1
mt-Cytb.2	5.78e-09	0.683432	0.195	0.09	0.000193237	FB_3	mt-Cytb
Rhoj	6.88e-09	-0.650111	0.684	0.74	0.000229886	FB_3	Rhoj
Rapgef2	7.01e-09	0.389913	0.574	0.378	0.000234188	FB_3	Rapgef2
Antxr2	7.3e-09	-0.866206	0.265	0.396	0.000244115	FB_3	Antxr2
Ifi205.1	7.56e-09	-0.983782	0.07	0.207	0.0002528	FB_3	Ifi205
Hspg2	7.85e-09	-0.729495	0.382	0.507	0.000262408	FB_3	Hspg2
Rasa3	8.01e-09	-0.895807	0.379	0.476	0.000267648	FB_3	Rasa3
Dlc1	8.21e-09	-0.479107	0.835	0.858	0.00027435	FB_3	Dlc1
Tpm1.2	9.48e-09	0.298555	0.206	0.096	0.000316928	FB_3	Tpm1
Plekhh2	9.71e-09	-0.723543	0.301	0.441	0.000324554	FB_3	Plekhh2
Tle4	1.13e-08	0.30043	0.272	0.139	0.000377939	FB_3	Tle4
Mecomos	1.14e-08	0.267944	0.11	0.04	0.000380157	FB_3	Mecomos
Ptprg.1	1.19e-08	0.587325	0.607	0.438	0.000399108	FB_3	Ptprg
Pbx3.1	1.2e-08	0.440365	0.412	0.246	0.000400136	FB_3	Pbx3
Trp53bp1	1.22e-08	0.251876	0.191	0.086	0.000407764	FB_3	Trp53bp1
Tmem245	1.36e-08	0.254079	0.25	0.124	0.000453167	FB_3	Tmem245
Rnpep	1.47e-08	0.296871	0.173	0.076	0.00049129	FB_3	Rnpep
Ebf1.2	1.5e-08	-0.468451	0.886	0.927	0.000501138	FB_3	Ebf1
Sec14l1	1.5e-08	0.312718	0.276	0.144	0.000502728	FB_3	Sec14l1
Vav3.2	1.65e-08	-0.457074	0.504	0.626	0.000550663	FB_3	Vav3
Serping1	1.68e-08	-0.802182	0.301	0.425	0.000561384	FB_3	Serping1
Rapgef6	1.87e-08	0.315015	0.489	0.3	0.000625082	FB_3	Rapgef6
A230057D06Rik	1.9e-08	0.38935	0.129	0.051	0.000633956	FB_3	A230057D06Rik
Crybg3	2.42e-08	0.256897	0.188	0.086	0.000808859	FB_3	Crybg3
Dst	2.47e-08	0.378362	0.765	0.559	0.000823961	FB_3	Dst
Filip1	2.48e-08	0.254461	0.279	0.145	0.00082834	FB_3	Filip1
Clec3b	2.5e-08	-0.872587	0.129	0.268	0.000836516	FB_3	Clec3b
Dab2	2.57e-08	0.433748	0.353	0.2	0.000858087	FB_3	Dab2
Ralgapb	2.73e-08	0.255104	0.415	0.244	0.000913252	FB_3	Ralgapb
Bnc2	2.85e-08	-0.857615	0.29	0.423	0.000951094	FB_3	Bnc2
Vim	2.86e-08	0.342574	0.467	0.287	0.000956954	FB_3	Vim
Trps1.1	2.87e-08	0.514747	0.879	0.811	0.000959429	FB_3	Trps1
4930438E09Rik	2.96e-08	-0.825605	0.066	0.197	0.000990314	FB_3	4930438E09Rik
mt-Nd4.1	2.98e-08	0.443578	0.162	0.071	0.000996758	FB_3	mt-Nd4
Lpar1.1	3.16e-08	-0.688361	0.5	0.582	0.0010563	FB_3	Lpar1
Myo10	3.42e-08	0.446952	0.158	0.07	0.00114168	FB_3	Myo10
Asap2.1	3.43e-08	0.294656	0.305	0.164	0.00114747	FB_3	Asap2
Ptprd	3.61e-08	-0.650281	0.434	0.542	0.00120646	FB_3	Ptprd
Id3	3.67e-08	0.370298	0.162	0.071	0.00122509	FB_3	Id3
Xpnpep1	3.8e-08	0.441761	0.206	0.099	0.00127045	FB_3	Xpnpep1
Tiparp	4.29e-08	0.307226	0.25	0.129	0.00143334	FB_3	Tiparp
Ifi203	4.38e-08	-0.740895	0.099	0.244	0.00146428	FB_3	Ifi203
Spata7	4.94e-08	0.251674	0.143	0.06	0.00165267	FB_3	Spata7
Tsc22d3.2	4.95e-08	0.390997	0.243	0.124	0.00165355	FB_3	Tsc22d3
Clasp1.1	5.14e-08	0.329552	0.294	0.16	0.00171661	FB_3	Clasp1
Myof.1	5.42e-08	0.282507	0.438	0.258	0.00181027	FB_3	Myof
Klhl2.1	5.43e-08	0.333056	0.21	0.103	0.00181553	FB_3	Klhl2
Nr4a1.2	5.47e-08	-1.27297	0.062	0.185	0.0018272	FB_3	Nr4a1
Znrf1	5.6e-08	0.261417	0.287	0.153	0.00187039	FB_3	Znrf1
Klhl5	5.63e-08	0.271043	0.221	0.109	0.00188206	FB_3	Klhl5
Tshz3	5.69e-08	-0.703713	0.401	0.514	0.00190173	FB_3	Tshz3
Tcf12.1	6.48e-08	0.424343	0.846	0.71	0.00216518	FB_3	Tcf12
Mkl1	6.72e-08	0.281597	0.143	0.062	0.00224498	FB_3	Mkl1
Mettl15	6.84e-08	0.300896	0.25	0.131	0.00228582	FB_3	Mettl15
Stard13	6.91e-08	0.752545	0.438	0.286	0.00230942	FB_3	Stard13
Snx10	7.56e-08	0.33595	0.202	0.098	0.00252581	FB_3	Snx10
Enox1	7.58e-08	-0.999591	0.099	0.223	0.0025321	FB_3	Enox1
Fmnl3	7.74e-08	0.251924	0.184	0.086	0.00258781	FB_3	Fmnl3
Maml3	8.09e-08	0.445935	0.537	0.359	0.00270453	FB_3	Maml3
Sertad4	8.22e-08	0.25868	0.158	0.07	0.0027458	FB_3	Sertad4
Pdzd2	8.68e-08	-0.742111	0.441	0.545	0.00290111	FB_3	Pdzd2
Robo2.2	8.83e-08	0.416347	0.221	0.113	0.00295142	FB_3	Robo2
Pde1a	9.07e-08	-0.532822	0.618	0.69	0.00303215	FB_3	Pde1a
Ssr3	9.22e-08	0.292767	0.173	0.08	0.00308258	FB_3	Ssr3
Adamts10	9.46e-08	-0.556093	0.585	0.639	0.00316093	FB_3	Adamts10
Grik2.2	9.49e-08	-0.988442	0.14	0.273	0.00317193	FB_3	Grik2
Rab30	9.52e-08	0.330473	0.257	0.136	0.00318228	FB_3	Rab30
C1qtnf7.1	1.16e-07	-0.511643	0.618	0.695	0.00386522	FB_3	C1qtnf7
Tgfbrap1	1.16e-07	0.262678	0.151	0.066	0.00387584	FB_3	Tgfbrap1
Rnf217	1.17e-07	0.290412	0.36	0.206	0.00389785	FB_3	Rnf217
D630003M21Rik	1.19e-07	-0.688468	0.254	0.38	0.0039862	FB_3	D630003M21Rik
Fam49b	1.22e-07	0.259961	0.213	0.106	0.00408072	FB_3	Fam49b
Gmds	1.26e-07	0.285904	0.632	0.43	0.00422103	FB_3	Gmds
Prrg1	1.26e-07	0.341275	0.294	0.163	0.00422362	FB_3	Prrg1
Lama4.2	1.28e-07	-0.611538	0.599	0.651	0.00427447	FB_3	Lama4
Rbms3	1.37e-07	-0.319403	0.956	0.957	0.00457856	FB_3	Rbms3
Ptprj.3	1.41e-07	0.351692	0.57	0.373	0.00470704	FB_3	Ptprj
mt-Nd4l	1.45e-07	0.26322	0.132	0.056	0.00485305	FB_3	mt-Nd4l
Dennd2a	1.51e-07	-0.754434	0.375	0.471	0.00503038	FB_3	Dennd2a
Kcnab1	1.74e-07	0.417224	0.136	0.059	0.00582765	FB_3	Kcnab1
Ncoa3	1.81e-07	0.29746	0.415	0.248	0.00603336	FB_3	Ncoa3
Rasa1	1.88e-07	0.3711	0.419	0.257	0.0062961	FB_3	Rasa1
Col6a6.1	1.91e-07	-0.837426	0.243	0.37	0.0063955	FB_3	Col6a6
Synj2	1.97e-07	0.253338	0.188	0.091	0.00657486	FB_3	Synj2
Pacs1	2.05e-07	0.346262	0.29	0.162	0.00686614	FB_3	Pacs1
Sidt2	2.32e-07	0.275701	0.173	0.081	0.00776401	FB_3	Sidt2
Papss2.1	2.53e-07	0.507656	0.272	0.153	0.00844142	FB_3	Papss2
Rbfox1.1	2.64e-07	-1.00824	0.114	0.245	0.00882746	FB_3	Rbfox1
Stxbp6.1	2.71e-07	0.631757	0.452	0.303	0.00906811	FB_3	Stxbp6
Gm48742	2.78e-07	0.475609	0.397	0.248	0.00928755	FB_3	Gm48742
Atxn1	2.81e-07	0.311196	0.717	0.53	0.009403	FB_3	Atxn1
Rad51b	3e-07	0.276783	0.118	0.048	0.0100364	FB_3	Rad51b
Adcy2	3.13e-07	0.378015	0.213	0.111	0.0104508	FB_3	Adcy2
Prex1	3.17e-07	0.255048	0.143	0.064	0.0105932	FB_3	Prex1
Pced1b	3.2e-07	0.277283	0.272	0.15	0.0106846	FB_3	Pced1b
Dpysl3	3.41e-07	0.401303	0.449	0.289	0.0114093	FB_3	Dpysl3
2510009E07Rik	3.49e-07	0.275531	0.147	0.066	0.0116588	FB_3	2510009E07Rik
Smad7	3.75e-07	0.274654	0.371	0.22	0.0125305	FB_3	Smad7
Lvrn.2	3.76e-07	-1.03164	0.066	0.181	0.0125563	FB_3	Lvrn
Gm36535	4.2e-07	-0.735379	0.221	0.336	0.0140327	FB_3	Gm36535
Map4k3	4.29e-07	0.311877	0.441	0.286	0.0143333	FB_3	Map4k3
Cdc42bpa	4.35e-07	0.29738	0.588	0.407	0.0145487	FB_3	Cdc42bpa
Cdh19.2	4.41e-07	-0.841044	0.235	0.356	0.0147557	FB_3	Cdh19
Lima1	4.44e-07	-0.687644	0.441	0.517	0.0148293	FB_3	Lima1
Rgma.1	4.47e-07	-0.912371	0.21	0.317	0.0149336	FB_3	Rgma
Znrf3	4.66e-07	0.274317	0.301	0.171	0.0155887	FB_3	Znrf3
Gsta3	4.75e-07	-0.876563	0.099	0.214	0.0158848	FB_3	Gsta3
Dzip3	4.81e-07	0.308195	0.21	0.106	0.01609	FB_3	Dzip3
Tek	5.19e-07	-0.671582	0.272	0.403	0.0173479	FB_3	Tek
Pde4a	5.36e-07	0.334061	0.221	0.116	0.0179212	FB_3	Pde4a
March3	5.46e-07	-0.780367	0.287	0.411	0.0182367	FB_3	March3
Ypel2	5.69e-07	0.273416	0.173	0.084	0.0190064	FB_3	Ypel2
Zmat1	6.27e-07	0.289973	0.162	0.077	0.0209529	FB_3	Zmat1
Ogdh	6.57e-07	0.270822	0.129	0.056	0.0219637	FB_3	Ogdh
Abca8b.1	6.61e-07	-0.653417	0.574	0.643	0.0220901	FB_3	Abca8b
Nfat5	6.89e-07	0.453068	0.706	0.55	0.02304	FB_3	Nfat5
Strbp.1	6.99e-07	0.392583	0.346	0.212	0.0233522	FB_3	Strbp
Pam.1	7.09e-07	0.387517	0.864	0.72	0.0237121	FB_3	Pam
Plxdc2.2	7.95e-07	-0.356166	0.842	0.883	0.0265784	FB_3	Plxdc2
Usp6nl	9.15e-07	0.264487	0.165	0.08	0.0305972	FB_3	Usp6nl
Rpl35a	9.41e-07	0.251274	0.125	0.054	0.0314416	FB_3	Rpl35a
Rgs6.2	9.81e-07	0.424242	0.599	0.439	0.0327884	FB_3	Rgs6
Gm42679	9.81e-07	-0.598119	0.037	0.14	0.0327994	FB_3	Gm42679
Pakap.2	9.93e-07	0.546681	0.272	0.164	0.0332037	FB_3	Pakap
Msantd2	1.03e-06	0.254155	0.371	0.222	0.0344235	FB_3	Msantd2
Slc25a21	1.04e-06	0.593089	0.11	0.047	0.0348269	FB_3	Slc25a21
Wdr66	1.05e-06	-0.789389	0.088	0.197	0.0352378	FB_3	Wdr66
Myl3.1	1.06e-06	0.270669	0.154	0.073	0.0353015	FB_3	Myl3
Lrp5	1.16e-06	0.265123	0.298	0.171	0.0386081	FB_3	Lrp5
Kcnip1.2	1.16e-06	-1.09422	0.077	0.191	0.0387482	FB_3	Kcnip1
Eepd1	1.17e-06	0.268377	0.121	0.053	0.0391363	FB_3	Eepd1
Kif13b	1.19e-06	-0.524141	0.522	0.579	0.0398451	FB_3	Kif13b
St5	1.25e-06	-0.674612	0.452	0.522	0.0417148	FB_3	St5
Efna5	1.27e-06	-0.580561	0.357	0.478	0.0423566	FB_3	Efna5
Medag	1.27e-06	-0.846114	0.301	0.393	0.0424815	FB_3	Medag
Kif13a	1.3e-06	0.294991	0.294	0.171	0.0434476	FB_3	Kif13a
Cop1	1.37e-06	0.363659	0.533	0.36	0.045805	FB_3	Cop1
Ifi211	1.44e-06	-0.624948	0.018	0.109	0.0480011	FB_3	Ifi211
Upp2	1.46e-06	0.296051	0.39	0.241	0.0486774	FB_3	Upp2
Tcp11l1	1.56e-06	0.255519	0.165	0.081	0.0521914	FB_3	Tcp11l1
Apoe.2	1.57e-06	0.529666	0.276	0.161	0.052401	FB_3	Apoe
Efemp1	1.61e-06	0.259236	0.158	0.076	0.0537287	FB_3	Efemp1
Ttll5	1.73e-06	0.251294	0.206	0.108	0.0578053	FB_3	Ttll5
Iqgap1	1.74e-06	0.30465	0.456	0.304	0.0580752	FB_3	Iqgap1
C2cd5	1.79e-06	0.352462	0.327	0.199	0.0599676	FB_3	C2cd5
Erc1	1.81e-06	0.29584	0.312	0.185	0.0603795	FB_3	Erc1
Mospd2	1.82e-06	0.251114	0.151	0.072	0.0609874	FB_3	Mospd2
Clasp2	1.92e-06	0.310589	0.665	0.467	0.064324	FB_3	Clasp2
Rgs17	1.96e-06	-0.781859	0.184	0.306	0.0656304	FB_3	Rgs17
Lrrfip1	1.98e-06	0.282579	0.11	0.047	0.0660957	FB_3	Lrrfip1
Neat1.2	2.07e-06	0.269402	0.603	0.424	0.069093	FB_3	Neat1
Fap.2	2.17e-06	-0.515424	0.305	0.43	0.072539	FB_3	Fap
Nfib	2.4e-06	0.266451	0.945	0.821	0.0802504	FB_3	Nfib
Fam49a	2.65e-06	-0.761143	0.268	0.366	0.0884592	FB_3	Fam49a
Cdon.1	2.68e-06	0.28266	0.346	0.208	0.0896028	FB_3	Cdon
Maob	2.78e-06	0.757075	0.154	0.075	0.0929796	FB_3	Maob
2210408I21Rik	3.27e-06	0.3861	0.386	0.248	0.109283	FB_3	2210408I21Rik
1700012D14Rik	3.6e-06	0.370344	0.107	0.046	0.12044	FB_3	1700012D14Rik
Junb	3.74e-06	-0.841988	0.051	0.149	0.12488	FB_3	Junb
Ankrd12	4.28e-06	0.250779	0.625	0.437	0.143003	FB_3	Ankrd12
Snx13	4.43e-06	0.338725	0.272	0.16	0.148178	FB_3	Snx13
Gabra3	4.49e-06	0.666091	0.228	0.131	0.150101	FB_3	Gabra3
Cers4	5.28e-06	0.282348	0.147	0.072	0.17646	FB_3	Cers4
Col5a3	5.3e-06	-0.645506	0.254	0.36	0.177097	FB_3	Col5a3
Htt	5.41e-06	0.250403	0.316	0.192	0.180861	FB_3	Htt
Lars2.2	5.51e-06	0.479474	0.511	0.374	0.184089	FB_3	Lars2
Tef.1	5.52e-06	0.285087	0.331	0.206	0.184437	FB_3	Tef
Ppm1b	5.68e-06	0.270072	0.243	0.138	0.18989	FB_3	Ppm1b
Fndc3a.1	5.83e-06	-0.639162	0.474	0.521	0.194934	FB_3	Fndc3a
Apbb1ip	5.84e-06	-0.737078	0.261	0.353	0.195188	FB_3	Apbb1ip
Ifi204	6.66e-06	-0.59987	0.022	0.105	0.222694	FB_3	Ifi204
Dock4.1	6.77e-06	0.344504	0.467	0.315	0.226369	FB_3	Dock4
Dpt	6.96e-06	0.319235	0.441	0.304	0.232534	FB_3	Dpt
Dcp1b	7.27e-06	0.267845	0.11	0.05	0.242846	FB_3	Dcp1b
Vgll3	7.59e-06	-0.910486	0.154	0.256	0.253838	FB_3	Vgll3
Slco2b1	7.61e-06	-0.868737	0.14	0.239	0.254215	FB_3	Slco2b1
Fmn1	7.62e-06	0.269886	0.107	0.046	0.25452	FB_3	Fmn1
Parp8	7.87e-06	0.304645	0.537	0.371	0.263141	FB_3	Parp8
Arhgap32.1	8.34e-06	-0.593668	0.375	0.455	0.278685	FB_3	Arhgap32
Fblim1	8.5e-06	0.288437	0.125	0.059	0.284197	FB_3	Fblim1
Crispld2	9.13e-06	-0.629014	0.283	0.398	0.305113	FB_3	Crispld2
Cacna2d1	9.4e-06	0.286188	0.537	0.374	0.31419	FB_3	Cacna2d1
Blnk.2	9.48e-06	-0.813536	0.066	0.158	0.316699	FB_3	Blnk
Utrn.1	9.82e-06	0.312346	0.665	0.5	0.328258	FB_3	Utrn
Hexb.1	1.08e-05	0.480375	0.342	0.23	0.360299	FB_3	Hexb
Nedd9.1	1.11e-05	0.441103	0.401	0.27	0.372305	FB_3	Nedd9
Igf1	1.12e-05	0.415265	0.342	0.214	0.375265	FB_3	Igf1
Gas6	1.2e-05	0.357025	0.199	0.111	0.400091	FB_3	Gas6
Svil	1.22e-05	0.357315	0.669	0.511	0.40759	FB_3	Svil
Wwtr1	1.23e-05	0.32929	0.54	0.375	0.409504	FB_3	Wwtr1
Itpr1.1	1.42e-05	-0.50204	0.735	0.706	0.474957	FB_3	Itpr1
Plekha6	1.43e-05	-0.488752	0.548	0.592	0.477656	FB_3	Plekha6
Fut8.1	1.46e-05	0.336228	0.485	0.339	0.489376	FB_3	Fut8
Xdh	1.48e-05	-0.539695	0.331	0.435	0.493913	FB_3	Xdh
Gm16083	1.49e-05	-0.690941	0.048	0.137	0.496923	FB_3	Gm16083
Pcdh19	1.51e-05	-0.91314	0.151	0.25	0.503477	FB_3	Pcdh19
Me1	1.58e-05	0.274963	0.147	0.075	0.529582	FB_3	Me1
Gphn	1.59e-05	0.482656	0.82	0.759	0.532397	FB_3	Gphn
Sema5a	1.63e-05	0.296786	0.415	0.278	0.54499	FB_3	Sema5a
Pla2r1	1.64e-05	-0.689304	0.184	0.28	0.547504	FB_3	Pla2r1
Ggt5.1	1.65e-05	-0.669383	0.096	0.194	0.550386	FB_3	Ggt5
2210408F21Rik	1.71e-05	-0.742149	0.176	0.281	0.571052	FB_3	2210408F21Rik
Itprid2	1.78e-05	-0.599367	0.132	0.235	0.594733	FB_3	Itprid2
Bmper	1.89e-05	-0.619625	0.471	0.536	0.630216	FB_3	Bmper
Rapgef1	2.12e-05	0.305746	0.283	0.173	0.707094	FB_3	Rapgef1
Gm10125	2.22e-05	-0.690028	0.143	0.246	0.742094	FB_3	Gm10125
Ncoa1	2.36e-05	-0.513675	0.614	0.621	0.788333	FB_3	Ncoa1
Arhgap21	2.37e-05	-0.505579	0.581	0.611	0.792358	FB_3	Arhgap21
Gucy1a2.1	2.62e-05	-0.588161	0.522	0.561	0.874927	FB_3	Gucy1a2
Chn1.1	2.85e-05	-0.777387	0.169	0.262	0.952831	FB_3	Chn1
Agmo.2	3.12e-05	-0.532807	0.485	0.553	1	FB_3	Agmo
Sesn1	3.17e-05	0.276437	0.228	0.134	1	FB_3	Sesn1
Meox2	3.2e-05	0.251547	0.118	0.056	1	FB_3	Meox2
2008-09-01	3.2e-05	-0.616142	0.257	0.35	1	FB_3	45908
Gm20559	3.29e-05	0.264812	0.151	0.079	1	FB_3	Gm20559
Ift81	3.68e-05	0.276972	0.173	0.095	1	FB_3	Ift81
Dchs2.1	4.03e-05	-0.764082	0.11	0.203	1	FB_3	Dchs2
Nckap5.2	4.07e-05	0.48302	0.265	0.167	1	FB_3	Nckap5
Slc8a1.2	4.35e-05	-0.846824	0.235	0.337	1	FB_3	Slc8a1
Adap2os.1	4.44e-05	-0.66755	0.07	0.157	1	FB_3	Adap2os
Cyth3	4.48e-05	-0.466035	0.673	0.672	1	FB_3	Cyth3
Stox2	4.53e-05	0.574558	0.287	0.19	1	FB_3	Stox2
Ptgis	4.55e-05	0.308154	0.548	0.394	1	FB_3	Ptgis
Adamts12.2	4.58e-05	0.612266	0.548	0.417	1	FB_3	Adamts12
Tenm3.2	5.12e-05	-0.387769	0.835	0.838	1	FB_3	Tenm3
Tcf7l1	5.2e-05	-0.500632	0.526	0.573	1	FB_3	Tcf7l1
Mpp7	5.29e-05	0.284388	0.213	0.125	1	FB_3	Mpp7
Mmp16	5.57e-05	0.25534	0.379	0.25	1	FB_3	Mmp16
Heyl	5.82e-05	-0.691205	0.143	0.234	1	FB_3	Heyl
B4galt1.1	6.41e-05	-0.634345	0.357	0.433	1	FB_3	B4galt1
Foxp1	6.54e-05	0.259027	0.665	0.497	1	FB_3	Foxp1
Vcan.2	6.61e-05	0.603742	0.43	0.302	1	FB_3	Vcan
Tasor2	6.92e-05	-0.607687	0.11	0.202	1	FB_3	Tasor2
Hivep2	7.24e-05	-0.479987	0.717	0.698	1	FB_3	Hivep2
Entpd2	7.34e-05	-0.53254	0.085	0.174	1	FB_3	Entpd2
Gm10974	7.58e-05	0.334245	0.132	0.069	1	FB_3	Gm10974
Ltbp1.1	8.39e-05	-0.536878	0.393	0.464	1	FB_3	Ltbp1
Nav3	8.41e-05	0.659229	0.199	0.119	1	FB_3	Nav3
Ogt	8.43e-05	0.259059	0.71	0.562	1	FB_3	Ogt
Ccn2	8.71e-05	0.423531	0.136	0.072	1	FB_3	Ccn2
Igf1r	9.13e-05	-0.424017	0.658	0.686	1	FB_3	Igf1r
Il6ra	9.78e-05	-0.62834	0.074	0.155	1	FB_3	Il6ra
Plcxd3	0.00010306	0.335594	0.154	0.085	1	FB_3	Plcxd3
Samd5	0.000106435	0.291817	0.154	0.085	1	FB_3	Samd5
Col4a2	0.000108296	-0.67639	0.257	0.336	1	FB_3	Col4a2
Hsd11b1.1	0.000111512	-0.627905	0.081	0.166	1	FB_3	Hsd11b1
Dapk2	0.000120873	0.255981	0.176	0.101	1	FB_3	Dapk2
Runx2	0.000130086	-0.495451	0.184	0.282	1	FB_3	Runx2
Mrc2	0.000130474	-0.589416	0.423	0.469	1	FB_3	Mrc2
Rgs7.1	0.000130701	-0.891325	0.107	0.192	1	FB_3	Rgs7
Fat3.1	0.000141966	0.257119	0.173	0.1	1	FB_3	Fat3
Tmem178b	0.000142145	-0.720695	0.088	0.167	1	FB_3	Tmem178b
Agap1	0.000152722	-0.523772	0.353	0.423	1	FB_3	Agap1
Tcf4	0.000161903	-0.263059	0.941	0.901	1	FB_3	Tcf4
Kcnk2	0.000168742	-0.689338	0.151	0.237	1	FB_3	Kcnk2
Ern1	0.000186624	0.260156	0.217	0.135	1	FB_3	Ern1
Mat2a.2	0.000187727	-0.856878	0.202	0.279	1	FB_3	Mat2a
Pkia	0.00019022	0.2655	0.224	0.138	1	FB_3	Pkia
Arhgap42.1	0.000200986	-0.520453	0.386	0.447	1	FB_3	Arhgap42
Pla1a.2	0.000210222	-0.644451	0.129	0.212	1	FB_3	Pla1a
Plekha5	0.000219251	-0.465098	0.544	0.582	1	FB_3	Plekha5
Gm4117	0.000219835	0.298232	0.121	0.064	1	FB_3	Gm4117
Gk5	0.000227331	-0.587578	0.331	0.389	1	FB_3	Gk5
Gm9947	0.000233537	-0.503779	0.04	0.109	1	FB_3	Gm9947
Slf2	0.000242169	-0.66811	0.301	0.364	1	FB_3	Slf2
Aspa	0.000266624	-0.619788	0.114	0.192	1	FB_3	Aspa
Gnao1	0.00027023	-0.529321	0.397	0.448	1	FB_3	Gnao1
Gm14964	0.000277073	-0.540626	0.04	0.107	1	FB_3	Gm14964
Aff3.1	0.000282852	0.277714	0.522	0.379	1	FB_3	Aff3
Cyp27a1.2	0.000285055	-0.761356	0.276	0.335	1	FB_3	Cyp27a1
Pbx1	0.000297945	-0.332679	0.754	0.759	1	FB_3	Pbx1
C3	0.000298192	-0.640761	0.07	0.144	1	FB_3	C3
Syt17	0.00030197	-0.54774	0.158	0.239	1	FB_3	Syt17
Syn2.1	0.000303516	-0.678704	0.048	0.116	1	FB_3	Syn2
Slc38a6	0.000309727	0.253546	0.199	0.123	1	FB_3	Slc38a6
Lrmda	0.000312963	0.277038	0.287	0.192	1	FB_3	Lrmda
Dclk1.2	0.000321512	-0.589187	0.342	0.41	1	FB_3	Dclk1
Mndal	0.00032863	-0.556836	0.151	0.234	1	FB_3	Mndal
Tpst1	0.000329299	-0.576527	0.224	0.3	1	FB_3	Tpst1
Hivep3	0.000334952	0.268027	0.467	0.34	1	FB_3	Hivep3
Cdk14	0.000341409	-0.407233	0.581	0.625	1	FB_3	Cdk14
Tgfbr3	0.000349325	-0.478237	0.618	0.617	1	FB_3	Tgfbr3
Zbtb16.3	0.000376744	-0.545703	0.621	0.61	1	FB_3	Zbtb16
Pcolce	0.000381576	-0.613401	0.165	0.241	1	FB_3	Pcolce
Sh3rf3.1	0.000385782	-0.685894	0.327	0.387	1	FB_3	Sh3rf3
Rem1	0.000387631	-0.627007	0.085	0.155	1	FB_3	Rem1
Flt3l	0.000413859	-0.536089	0.121	0.204	1	FB_3	Flt3l
Adgrd1.3	0.000430921	-0.774253	0.136	0.215	1	FB_3	Adgrd1
Aldh1a2.2	0.000464696	-0.61344	0.066	0.137	1	FB_3	Aldh1a2
Dleu2	0.000539095	0.370972	0.386	0.291	1	FB_3	Dleu2
Rbpj	0.000589637	0.288525	0.327	0.23	1	FB_3	Rbpj
Zdhhc14	0.000610857	-0.552105	0.132	0.209	1	FB_3	Zdhhc14
Anxa3.2	0.000624467	-0.619272	0.136	0.209	1	FB_3	Anxa3
Dapk1.2	0.000695355	-0.706833	0.239	0.314	1	FB_3	Dapk1
Hunk	0.000796783	-0.514654	0.066	0.134	1	FB_3	Hunk
Gm17501	0.000868668	-0.752828	0.096	0.163	1	FB_3	Gm17501
Kirrel	0.000872807	-0.515122	0.386	0.433	1	FB_3	Kirrel
Jarid2.2	0.000889322	-0.482482	0.452	0.5	1	FB_3	Jarid2
Irak3	0.000900105	-0.607981	0.151	0.219	1	FB_3	Irak3
Zeb2.1	0.000937831	-0.306136	0.86	0.817	1	FB_3	Zeb2
Cygb	0.000950122	-0.538214	0.265	0.33	1	FB_3	Cygb
Serpine2	0.00102545	-0.55177	0.066	0.13	1	FB_3	Serpine2
Fmnl2	0.00107138	-0.518944	0.452	0.499	1	FB_3	Fmnl2
Cpq	0.00109273	-0.356853	0.732	0.715	1	FB_3	Cpq
Podn	0.00117232	-0.567943	0.121	0.188	1	FB_3	Podn
Psd3.2	0.00123612	0.415032	0.82	0.752	1	FB_3	Psd3
Eda	0.00129353	-0.406559	0.735	0.722	1	FB_3	Eda
Nnmt	0.00157854	-0.440381	0.048	0.104	1	FB_3	Nnmt
Ust	0.00164412	-0.459002	0.596	0.575	1	FB_3	Ust
Angptl2	0.00164766	-0.618083	0.261	0.313	1	FB_3	Angptl2
Cd55.2	0.00165566	-0.543917	0.121	0.189	1	FB_3	Cd55
Nktr	0.0017001	-0.377683	0.566	0.569	1	FB_3	Nktr
Eps15	0.00188522	0.261954	0.669	0.541	1	FB_3	Eps15
Dtx4	0.00191025	-0.512147	0.099	0.162	1	FB_3	Dtx4
Nova1	0.0020325	-0.585353	0.136	0.199	1	FB_3	Nova1
Cacna1a	0.0020665	-0.616163	0.118	0.179	1	FB_3	Cacna1a
Tacc1	0.0020791	-0.538232	0.515	0.517	1	FB_3	Tacc1
Pkd1	0.00237141	0.267522	0.614	0.489	1	FB_3	Pkd1
Osbpl9	0.00238784	0.266239	0.629	0.499	1	FB_3	Osbpl9
Ldlrad4.1	0.00253006	0.323516	0.849	0.751	1	FB_3	Ldlrad4
Sox5os4	0.0026539	-0.483322	0.11	0.175	1	FB_3	Sox5os4
Deptor	0.0026864	-0.562607	0.206	0.263	1	FB_3	Deptor
Gpx3	0.00274097	-0.580362	0.118	0.176	1	FB_3	Gpx3
Htra3	0.00279388	-0.308345	0.577	0.621	1	FB_3	Htra3
Kcp	0.00291846	-0.471912	0.062	0.116	1	FB_3	Kcp
Fbln2.2	0.00298598	-0.556145	0.235	0.297	1	FB_3	Fbln2
Sp100	0.00312518	-0.490272	0.265	0.322	1	FB_3	Sp100
Kcnip3	0.00322369	-0.490928	0.059	0.112	1	FB_3	Kcnip3
Nrp2	0.00355129	0.286706	0.121	0.074	1	FB_3	Nrp2
Acap2	0.00396862	-0.436727	0.463	0.483	1	FB_3	Acap2
Auts2	0.00406729	-0.255057	0.79	0.789	1	FB_3	Auts2
Gm36975	0.00413066	0.257865	0.14	0.089	1	FB_3	Gm36975
Btg2	0.00447857	-0.53777	0.088	0.146	1	FB_3	Btg2
Nab1	0.00449375	-0.469509	0.169	0.232	1	FB_3	Nab1
Tcf25	0.00456365	-0.525566	0.217	0.271	1	FB_3	Tcf25
Spry1	0.0047922	-0.449565	0.125	0.185	1	FB_3	Spry1
Gm10115	0.00479822	-0.488119	0.129	0.186	1	FB_3	Gm10115
Apba2	0.0048185	-0.641091	0.081	0.133	1	FB_3	Apba2
Pcdh7.2	0.0048417	-0.773086	0.096	0.153	1	FB_3	Pcdh7
Ccdc171	0.00502595	-0.520439	0.143	0.201	1	FB_3	Ccdc171
Rrbp1	0.0050284	-0.436868	0.474	0.485	1	FB_3	Rrbp1
Spry2.1	0.00523631	-0.487104	0.085	0.138	1	FB_3	Spry2
Fkbp5.1	0.00567434	-0.457437	0.5	0.505	1	FB_3	Fkbp5
Cers6	0.00589034	-0.482693	0.125	0.182	1	FB_3	Cers6
Dcun1d3	0.00680119	-0.560027	0.121	0.172	1	FB_3	Dcun1d3
Arhgap10	0.0068834	-0.469241	0.39	0.419	1	FB_3	Arhgap10
Ube2e2	0.00709782	-0.357192	0.673	0.653	1	FB_3	Ube2e2
Sec24d	0.00721108	-0.400169	0.522	0.528	1	FB_3	Sec24d
Timp3.1	0.00757879	-0.309033	0.566	0.429	1	FB_3	Timp3
Csgalnact1	0.00757983	-0.442899	0.353	0.394	1	FB_3	Csgalnact1
Pcolce2.1	0.00881482	-0.542021	0.18	0.231	1	FB_3	Pcolce2
Gm4951	0.00903184	0.358354	0.125	0.079	1	FB_3	Gm4951
Smad3.1	0.00928235	-0.575061	0.382	0.394	1	FB_3	Smad3
Cdr2	0.00940903	-0.439407	0.066	0.112	1	FB_3	Cdr2
Mir22hg	0.00940958	-0.295449	0.059	0.107	1	FB_3	Mir22hg
Reps2	0.00950125	-0.413615	0.151	0.207	1	FB_3	Reps2
Asap3	0.00961434	-0.47262	0.147	0.198	1	FB_3	Asap3
Npdc1	0.00969514	-0.408544	0.074	0.122	1	FB_3	Npdc1
Tspan11	4.79e-307	1.44734	0.235	0.004	1.6e-302	FB_4	Tspan11
Foxd1	4.71e-218	0.787512	0.115	0.001	1.57e-213	FB_4	Foxd1
Bmpr1b	1.4e-182	0.943991	0.12	0.002	4.7e-178	FB_4	Bmpr1b
Nhsl2.1	4.27e-115	1.72928	0.3	0.026	1.43e-110	FB_4	Nhsl2
Prdm6	3.54e-103	1.07388	0.15	0.007	1.18e-98	FB_4	Prdm6
Fosb	7.5e-97	1.73969	0.15	0.007	2.51e-92	FB_4	Fosb
Ccdc3	4.98e-84	0.878992	0.105	0.004	1.66e-79	FB_4	Ccdc3
Gm29683	2.02e-77	1.28082	0.16	0.011	6.74e-73	FB_4	Gm29683
C7.1	1.79e-74	2.77513	0.49	0.103	6e-70	FB_4	C7
Nr4a2	2.73e-65	1.50599	0.165	0.014	9.12e-61	FB_4	Nr4a2
Sorcs2	6.01e-62	1.57817	0.355	0.064	2.01e-57	FB_4	Sorcs2
Cpne7	1.86e-58	0.984303	0.155	0.014	6.2e-54	FB_4	Cpne7
Aff2.1	3.31e-54	1.72778	0.28	0.046	1.1e-49	FB_4	Aff2
Gli1	4.33e-53	1.1578	0.26	0.041	1.45e-48	FB_4	Gli1
Mfap4.1	9.85e-51	1.49199	0.35	0.074	3.29e-46	FB_4	Mfap4
Cilp	2.47e-49	1.20745	0.18	0.022	8.27e-45	FB_4	Cilp
Pcsk6.3	2.7e-48	-2.41737	0.175	0.704	9.01e-44	FB_4	Pcsk6
Sult5a1	3.53e-47	1.2466	0.2	0.027	1.18e-42	FB_4	Sult5a1
Csrp2.1	2.02e-45	1.44613	0.26	0.047	6.74e-41	FB_4	Csrp2
Nr4a3	1.45e-43	2.40405	0.305	0.065	4.84e-39	FB_4	Nr4a3
Csmd1	1.2e-41	1.83023	0.195	0.029	4e-37	FB_4	Csmd1
Kcnt2.1	1.73e-39	1.07785	0.96	0.905	5.8e-35	FB_4	Kcnt2
B130024G19Rik	8.32e-39	1.27544	0.215	0.037	2.78e-34	FB_4	B130024G19Rik
Ccn2.1	1.2e-38	1.73308	0.305	0.07	4e-34	FB_4	Ccn2
Gpr39.1	4.06e-38	1.84174	0.35	0.09	1.36e-33	FB_4	Gpr39
Plcxd3.1	8.57e-36	1.67424	0.325	0.083	2.86e-31	FB_4	Plcxd3
Piezo2.1	5.65e-35	1.1543	0.205	0.037	1.89e-30	FB_4	Piezo2
Ptgs2	6.78e-35	0.857085	0.1	0.01	2.27e-30	FB_4	Ptgs2
Dpyd.2	1.85e-34	1.4473	0.525	0.197	6.18e-30	FB_4	Dpyd
Cped1	2.73e-34	1.08209	0.91	0.774	9.13e-30	FB_4	Cped1
Fos	5e-34	1.13606	0.17	0.027	1.67e-29	FB_4	Fos
Ebf1.3	1.29e-32	-1.17419	0.7	0.929	4.3e-28	FB_4	Ebf1
Adgrl3.3	1.09e-31	-2.38095	0.055	0.492	3.65e-27	FB_4	Adgrl3
Pcsk5	1.65e-31	1.85271	0.435	0.154	5.52e-27	FB_4	Pcsk5
Bnc2.1	4.4e-30	1.29627	0.735	0.416	1.47e-25	FB_4	Bnc2
Col4a6.1	9.08e-30	1.25048	0.29	0.076	3.04e-25	FB_4	Col4a6
Aff3.2	1.14e-29	1.36299	0.675	0.377	3.82e-25	FB_4	Aff3
Plxdc2.3	7.73e-29	-1.11408	0.64	0.886	2.58e-24	FB_4	Plxdc2
Pdlim3.3	7.84e-29	1.94616	0.31	0.09	2.62e-24	FB_4	Pdlim3
Gpc6.1	8.11e-29	-1.02696	0.93	0.968	2.71e-24	FB_4	Gpc6
Adamtsl2.1	9.05e-29	1.44291	0.4	0.139	3.02e-24	FB_4	Adamtsl2
Hecw2.1	3.86e-27	0.809162	0.155	0.027	1.29e-22	FB_4	Hecw2
Grm7	4.22e-26	1.53321	0.14	0.023	1.41e-21	FB_4	Grm7
Sntg2.1	4.44e-26	0.980399	0.185	0.039	1.48e-21	FB_4	Sntg2
Rora.1	1.73e-25	-0.717548	0.945	0.98	5.78e-21	FB_4	Rora
Pid1.1	3.7e-25	1.23054	0.835	0.699	1.24e-20	FB_4	Pid1
Zeb1.2	5.46e-25	-0.91948	0.81	0.929	1.82e-20	FB_4	Zeb1
F3	1.42e-24	1.28983	0.27	0.078	4.73e-20	FB_4	F3
Airn.1	1.54e-24	-1.21992	0.625	0.796	5.14e-20	FB_4	Airn
Gpc3	1.66e-24	1.17908	0.26	0.071	5.54e-20	FB_4	Gpc3
Ptch1	1.76e-24	1.36382	0.26	0.074	5.89e-20	FB_4	Ptch1
Rgs6.3	1.88e-24	-2.44837	0.08	0.447	6.28e-20	FB_4	Rgs6
Cdh11.1	2.76e-24	1.35636	0.27	0.079	9.24e-20	FB_4	Cdh11
Lsamp.3	4.6e-24	1.09893	0.84	0.586	1.54e-19	FB_4	Lsamp
Flt3l.1	1.32e-23	1.2859	0.45	0.199	4.42e-19	FB_4	Flt3l
Ptch2	4.09e-23	1.14219	0.19	0.045	1.37e-18	FB_4	Ptch2
Myo1d.1	4.93e-23	1.27461	0.415	0.171	1.65e-18	FB_4	Myo1d
Itgbl1	1.77e-22	1.0615	0.78	0.542	5.92e-18	FB_4	Itgbl1
Sgip1.1	2.86e-22	1.10044	0.4	0.157	9.55e-18	FB_4	Sgip1
Skil	2.93e-22	1.24762	0.38	0.152	9.8e-18	FB_4	Skil
Nalcn.1	5.84e-22	0.986973	0.555	0.265	1.95e-17	FB_4	Nalcn
Sertad4.1	1.38e-21	0.891411	0.24	0.069	4.61e-17	FB_4	Sertad4
Adamts6.2	1.52e-21	1.22701	0.39	0.155	5.09e-17	FB_4	Adamts6
Gfra1.2	2.71e-21	-1.99161	0.035	0.37	9.05e-17	FB_4	Gfra1
Mast4.2	5.1e-21	-0.797926	0.81	0.925	1.71e-16	FB_4	Mast4
Gria4	2.82e-20	1.47429	0.13	0.025	9.43e-16	FB_4	Gria4
Meox2.1	3.25e-20	1.00223	0.205	0.055	1.09e-15	FB_4	Meox2
Pbx1.1	3.4e-20	0.997506	0.86	0.757	1.14e-15	FB_4	Pbx1
Lamc1.1	1.25e-19	-0.844171	0.625	0.843	4.19e-15	FB_4	Lamc1
Fmnl2.1	1.33e-19	1.20071	0.7	0.496	4.45e-15	FB_4	Fmnl2
Nr4a1.3	3.48e-19	1.26454	0.41	0.18	1.16e-14	FB_4	Nr4a1
Adap2.1	6.36e-19	-1.66638	0.05	0.358	2.13e-14	FB_4	Adap2
Cfh.1	6.83e-19	0.951967	0.8	0.597	2.28e-14	FB_4	Cfh
Ebf3.1	7.27e-19	-1.43237	0.115	0.432	2.43e-14	FB_4	Ebf3
Col14a1.2	8.01e-19	1.13876	0.48	0.236	2.68e-14	FB_4	Col14a1
Morrbid.3	9.45e-19	-1.65849	0.145	0.468	3.16e-14	FB_4	Morrbid
Fry.1	1.09e-18	0.781063	0.14	0.03	3.66e-14	FB_4	Fry
Fap.3	1.75e-18	-1.54668	0.115	0.432	5.85e-14	FB_4	Fap
Ifrd1.1	5.6e-18	1.47295	0.325	0.132	1.87e-13	FB_4	Ifrd1
Zfyve28	1.89e-17	0.71106	0.16	0.04	6.32e-13	FB_4	Zfyve28
Tgfbi.1	3.5e-17	0.933097	0.155	0.039	1.17e-12	FB_4	Tgfbi
Gpm6b.1	3.91e-17	-1.08545	0.355	0.654	1.31e-12	FB_4	Gpm6b
Tiam2.1	4.22e-17	0.953907	0.205	0.062	1.41e-12	FB_4	Tiam2
Epha3.1	4.36e-17	0.792795	0.135	0.03	1.46e-12	FB_4	Epha3
Zfp423.1	6.64e-17	0.797861	0.32	0.125	2.22e-12	FB_4	Zfp423
Nox4.1	1.71e-16	1.18791	0.465	0.241	5.7e-12	FB_4	Nox4
Mical2.3	3.56e-16	1.27785	0.37	0.169	1.19e-11	FB_4	Mical2
Pmepa1.1	6.09e-16	0.999035	0.505	0.281	2.04e-11	FB_4	Pmepa1
9630002D21Rik	6.14e-16	0.831405	0.135	0.032	2.05e-11	FB_4	9630002D21Rik
Gxylt2	6.66e-16	1.02011	0.59	0.357	2.22e-11	FB_4	Gxylt2
Ssh2.1	9.29e-16	-0.863047	0.45	0.703	3.1e-11	FB_4	Ssh2
Igf1.1	1.07e-15	1.24083	0.425	0.214	3.58e-11	FB_4	Igf1
Tiam1.1	1.33e-15	1.09462	0.32	0.136	4.46e-11	FB_4	Tiam1
Galnt17.1	2.57e-15	1.00238	0.505	0.28	8.59e-11	FB_4	Galnt17
Col4a3	2.59e-15	1.23927	0.445	0.233	8.65e-11	FB_4	Col4a3
Csgalnact1.1	2.65e-15	-1.24992	0.11	0.397	8.85e-11	FB_4	Csgalnact1
Colgalt2	3.12e-15	-1.04869	0.07	0.359	1.04e-10	FB_4	Colgalt2
Itpr1.2	3.38e-15	-0.888724	0.48	0.709	1.13e-10	FB_4	Itpr1
Adamts15.1	1.62e-14	1.03362	0.195	0.064	5.4e-10	FB_4	Adamts15
Ldlrad4.2	2.41e-14	0.646742	0.885	0.751	8.06e-10	FB_4	Ldlrad4
Zmiz1.1	2.79e-14	0.937202	0.495	0.283	9.33e-10	FB_4	Zmiz1
Fndc1.2	2.85e-14	-1.09872	0.21	0.479	9.53e-10	FB_4	Fndc1
Lamb1.2	3.87e-14	-1.13743	0.09	0.359	1.29e-09	FB_4	Lamb1
Slit2.2	7.38e-14	-1.0361	0.245	0.517	2.47e-09	FB_4	Slit2
Col4a4	1.1e-13	0.937235	0.625	0.423	3.69e-09	FB_4	Col4a4
Lama4.3	1.66e-13	-0.911064	0.45	0.653	5.56e-09	FB_4	Lama4
Thsd7a.2	2.02e-13	-0.986995	0.485	0.718	6.76e-09	FB_4	Thsd7a
Efna5.1	2.46e-13	0.625329	0.7	0.473	8.22e-09	FB_4	Efna5
Cdh19.3	2.6e-13	-1.2022	0.1	0.357	8.68e-09	FB_4	Cdh19
Ltbp1.2	2.83e-13	-1.1682	0.21	0.466	9.46e-09	FB_4	Ltbp1
Col3a1.2	2.91e-13	0.809979	0.77	0.603	9.71e-09	FB_4	Col3a1
Tmcc3.1	5.12e-13	0.915167	0.55	0.341	1.71e-08	FB_4	Tmcc3
Jph2	6.05e-13	0.952162	0.145	0.042	2.02e-08	FB_4	Jph2
Sox5.1	6.06e-13	-0.542684	0.8	0.901	2.02e-08	FB_4	Sox5
Sema3c.3	6.33e-13	0.727959	0.295	0.125	2.11e-08	FB_4	Sema3c
Gli2	6.37e-13	0.694083	0.565	0.353	2.13e-08	FB_4	Gli2
Calcrl	6.75e-13	-1.15487	0.035	0.267	2.26e-08	FB_4	Calcrl
Nhs.1	9.2e-13	1.02846	0.235	0.091	3.08e-08	FB_4	Nhs
Col5a3.1	9.26e-13	-1.14748	0.11	0.361	3.1e-08	FB_4	Col5a3
Chst11.1	1.35e-12	0.660194	0.175	0.058	4.52e-08	FB_4	Chst11
Plce1.2	1.62e-12	0.760118	0.505	0.302	5.41e-08	FB_4	Plce1
Adcy7	1.65e-12	1.04299	0.46	0.274	5.53e-08	FB_4	Adcy7
Prickle1.2	1.66e-12	1.02889	0.475	0.294	5.56e-08	FB_4	Prickle1
Tnxb.1	1.87e-12	-0.693941	0.595	0.778	6.26e-08	FB_4	Tnxb
Slc2a13.1	3.04e-12	0.733514	0.16	0.051	1.02e-07	FB_4	Slc2a13
Pcdh9.2	5.84e-12	-0.640402	0.815	0.924	1.95e-07	FB_4	Pcdh9
Unc13b.1	8.16e-12	0.649807	0.14	0.041	2.73e-07	FB_4	Unc13b
Kcnip1.3	8.37e-12	-1.83091	0	0.192	2.8e-07	FB_4	Kcnip1
Zdhhc14.1	1.08e-11	0.866717	0.385	0.205	3.6e-07	FB_4	Zdhhc14
Thsd7b	1.24e-11	0.854223	0.115	0.031	4.14e-07	FB_4	Thsd7b
Rasa3.1	1.27e-11	-0.972732	0.24	0.477	4.26e-07	FB_4	Rasa3
Lhfp	1.58e-11	-0.546248	0.755	0.888	5.27e-07	FB_4	Lhfp
Pappa.2	1.6e-11	0.968988	0.245	0.101	5.35e-07	FB_4	Pappa
Bmper.1	1.91e-11	-0.875426	0.29	0.539	6.37e-07	FB_4	Bmper
Nr2f2	1.93e-11	0.690738	0.195	0.073	6.43e-07	FB_4	Nr2f2
Htra3.1	2.27e-11	-0.730965	0.38	0.623	7.59e-07	FB_4	Htra3
Dock9.1	2.7e-11	0.950214	0.38	0.207	9.02e-07	FB_4	Dock9
Setbp1.1	2.82e-11	0.660965	0.775	0.671	9.43e-07	FB_4	Setbp1
Btg2.1	5.76e-11	0.929362	0.3	0.143	1.92e-06	FB_4	Btg2
Boc	6.39e-11	0.84456	0.285	0.135	2.14e-06	FB_4	Boc
Foxp1.1	6.88e-11	0.768654	0.655	0.498	2.3e-06	FB_4	Foxp1
Prkd1.2	1.02e-10	0.794065	0.27	0.121	3.4e-06	FB_4	Prkd1
Enpp2	1.25e-10	-1.13952	0.03	0.222	4.17e-06	FB_4	Enpp2
Mgp.1	1.32e-10	0.986201	0.6	0.418	4.41e-06	FB_4	Mgp
Ablim3.1	1.49e-10	0.555415	0.17	0.06	4.96e-06	FB_4	Ablim3
Homer1	1.59e-10	1.47351	0.11	0.031	5.32e-06	FB_4	Homer1
Rgs7.2	1.61e-10	-1.60479	0.015	0.193	5.38e-06	FB_4	Rgs7
Asap1.1	1.71e-10	-0.58228	0.485	0.702	5.71e-06	FB_4	Asap1
Adamts2	2.01e-10	0.687081	0.64	0.452	6.73e-06	FB_4	Adamts2
Junb.1	2.38e-10	0.907064	0.295	0.145	7.96e-06	FB_4	Junb
Pde1a.1	2.46e-10	-0.635415	0.465	0.692	8.22e-06	FB_4	Pde1a
Eif4g3	2.61e-10	-0.748401	0.4	0.606	8.73e-06	FB_4	Eif4g3
Lrp6	2.7e-10	0.957732	0.475	0.306	9.03e-06	FB_4	Lrp6
Inmt	2.74e-10	0.589239	0.13	0.041	9.15e-06	FB_4	Inmt
Tbx20.2	3.26e-10	-0.824815	0.33	0.573	1.09e-05	FB_4	Tbx20
Trhde.2	3.56e-10	-1.20145	0.065	0.264	1.19e-05	FB_4	Trhde
Adam19.1	6.08e-10	-0.865985	0.165	0.378	2.03e-05	FB_4	Adam19
Adamts1	7.14e-10	0.949134	0.175	0.066	2.39e-05	FB_4	Adamts1
Eln.1	7.15e-10	1.2413	0.485	0.333	2.39e-05	FB_4	Eln
Ptgis.1	7.88e-10	0.834052	0.54	0.395	2.63e-05	FB_4	Ptgis
Arhgap6	7.99e-10	-0.726949	0.56	0.738	2.67e-05	FB_4	Arhgap6
Dlc1.1	8.31e-10	-0.601667	0.775	0.858	2.78e-05	FB_4	Dlc1
Mrvi1	9.34e-10	-1.11432	0.025	0.2	3.12e-05	FB_4	Mrvi1
Blnk.3	1.06e-09	-1.09062	0	0.159	3.53e-05	FB_4	Blnk
Ptprd.1	1.34e-09	0.810366	0.685	0.538	4.47e-05	FB_4	Ptprd
Pla1a.3	1.43e-09	-1.03545	0.035	0.212	4.78e-05	FB_4	Pla1a
Pdzrn3.1	2.2e-09	0.877722	0.545	0.363	7.34e-05	FB_4	Pdzrn3
Col4a5.1	2.99e-09	0.722228	0.335	0.179	0.0001	FB_4	Col4a5
Akap13.1	3.02e-09	0.561879	0.835	0.727	0.000100783	FB_4	Akap13
Sgcd.2	3.49e-09	-0.876444	0.655	0.776	0.00011655	FB_4	Sgcd
Kcnk2.1	4.29e-09	0.897822	0.39	0.233	0.0001434	FB_4	Kcnk2
Prex2.1	4.72e-09	-0.638487	0.565	0.729	0.00015765	FB_4	Prex2
Plxna4.4	4.9e-09	0.716461	0.235	0.108	0.000163848	FB_4	Plxna4
Sulf2	5.22e-09	0.612273	0.245	0.115	0.000174572	FB_4	Sulf2
Sema3d	6.79e-09	0.916631	0.215	0.096	0.000226926	FB_4	Sema3d
Lrig3	6.86e-09	0.615821	0.125	0.042	0.000229329	FB_4	Lrig3
Atrnl1.1	7.02e-09	-0.49268	0.63	0.801	0.000234673	FB_4	Atrnl1
Actn1.1	7.43e-09	0.638923	0.155	0.059	0.000248401	FB_4	Actn1
Emd	8.05e-09	0.882823	0.15	0.057	0.000268954	FB_4	Emd
Filip1l.2	9.89e-09	0.725446	0.225	0.102	0.000330672	FB_4	Filip1l
Pvt1	1.04e-08	-0.820671	0.16	0.36	0.000346808	FB_4	Pvt1
Chn1.2	1.18e-08	-1.00136	0.085	0.262	0.000395934	FB_4	Chn1
Dennd4a.1	1.29e-08	1.11983	0.42	0.274	0.000430466	FB_4	Dennd4a
Podn.1	1.4e-08	0.761209	0.33	0.185	0.000468492	FB_4	Podn
Dkk3.1	1.63e-08	0.566022	0.115	0.038	0.000545461	FB_4	Dkk3
Tmtc1.1	1.68e-08	0.634261	0.6	0.436	0.000560738	FB_4	Tmtc1
Ell2	1.82e-08	1.023	0.15	0.059	0.000607604	FB_4	Ell2
Vcl	1.96e-08	1.01755	0.4	0.253	0.000654808	FB_4	Vcl
Pde3b.1	2.88e-08	0.596315	0.19	0.082	0.000962501	FB_4	Pde3b
Rara	3.09e-08	0.571322	0.125	0.045	0.00103304	FB_4	Rara
Sik1	3.32e-08	0.713313	0.25	0.124	0.00111039	FB_4	Sik1
Adamtsl3.2	4.03e-08	-1.00225	0.32	0.49	0.00134563	FB_4	Adamtsl3
Srpx2	4.52e-08	-0.853262	0.035	0.186	0.00150937	FB_4	Srpx2
Fgf7	5.93e-08	0.636095	0.15	0.06	0.00198227	FB_4	Fgf7
Thrb.2	7.72e-08	0.777719	0.285	0.152	0.00257943	FB_4	Thrb
Grik2.3	7.98e-08	-0.935663	0.1	0.273	0.00266844	FB_4	Grik2
Nid1.1	8.64e-08	-0.734643	0.335	0.519	0.00288666	FB_4	Nid1
Apba2.1	8.8e-08	-1.00315	0.005	0.134	0.00294263	FB_4	Apba2
Tll2.2	1.22e-07	-1.00077	0	0.124	0.0040696	FB_4	Tll2
Slc44a1	1.35e-07	-0.619736	0.245	0.444	0.00451427	FB_4	Slc44a1
Wipf1	1.41e-07	-0.613535	0.43	0.603	0.0047029	FB_4	Wipf1
Magi1.2	1.5e-07	0.813577	0.26	0.138	0.00502503	FB_4	Magi1
Smad7.1	1.59e-07	0.73228	0.36	0.221	0.00531859	FB_4	Smad7
Gas6.1	1.93e-07	0.816144	0.22	0.111	0.00645508	FB_4	Gas6
Gsta3.1	1.94e-07	-0.909688	0.065	0.213	0.00647708	FB_4	Gsta3
Stxbp6.2	1.97e-07	-0.848982	0.135	0.308	0.00658472	FB_4	Stxbp6
Myo1b	2.04e-07	-0.787784	0.02	0.155	0.00682111	FB_4	Myo1b
Gabre	2.1e-07	0.875556	0.115	0.042	0.00701722	FB_4	Gabre
Coq10b	2.13e-07	0.878923	0.26	0.144	0.00712205	FB_4	Coq10b
Adamts5.1	2.14e-07	-0.609955	0.435	0.611	0.00716206	FB_4	Adamts5
Fam227b	2.68e-07	0.457094	0.1	0.034	0.00896137	FB_4	Fam227b
Pdzd2.1	3e-07	-0.619355	0.36	0.546	0.0100417	FB_4	Pdzd2
Mpped2	3.05e-07	-0.891099	0.05	0.196	0.0101971	FB_4	Mpped2
Gse1	3.14e-07	0.652641	0.315	0.184	0.0104948	FB_4	Gse1
Notch3	3.56e-07	-0.971626	0.015	0.139	0.0119008	FB_4	Notch3
Ntn1	3.64e-07	0.637033	0.37	0.236	0.0121636	FB_4	Ntn1
Sept8.1	4.33e-07	-0.636919	0.17	0.351	0.0144622	FB_4	Sept8
Glis3.1	4.45e-07	-0.695474	0.22	0.407	0.0148815	FB_4	Glis3
Abca6.1	4.99e-07	-0.530384	0.365	0.552	0.016686	FB_4	Abca6
Rftn1	5.15e-07	0.619369	0.44	0.298	0.0172233	FB_4	Rftn1
Fblim1.1	5.4e-07	0.680983	0.14	0.059	0.018045	FB_4	Fblim1
Col1a2	6.58e-07	0.705567	0.585	0.476	0.0219998	FB_4	Col1a2
Aspa.1	7.33e-07	0.6602	0.315	0.188	0.0244887	FB_4	Aspa
Col6a6.2	7.67e-07	-0.746737	0.2	0.37	0.0256301	FB_4	Col6a6
Tspan5.2	7.82e-07	0.610828	0.335	0.202	0.0261193	FB_4	Tspan5
Adamts9	7.88e-07	0.611099	0.125	0.049	0.0263323	FB_4	Adamts9
Ncoa1.1	8.29e-07	-0.520347	0.49	0.623	0.0276953	FB_4	Ncoa1
Igf2r	9.35e-07	-0.535376	0.34	0.53	0.0312541	FB_4	Igf2r
Ank2.1	1.02e-06	-0.442891	0.635	0.78	0.0340844	FB_4	Ank2
Pxdn	1.03e-06	-0.770394	0.09	0.235	0.0343267	FB_4	Pxdn
Xylt1	1.03e-06	0.603688	0.32	0.193	0.0345252	FB_4	Xylt1
Mir99ahg	1.1e-06	0.579206	0.785	0.746	0.0367283	FB_4	Mir99ahg
Angptl2.1	1.14e-06	-0.708709	0.15	0.315	0.0382113	FB_4	Angptl2
Syt17.1	1.18e-06	-0.657893	0.09	0.24	0.0393772	FB_4	Syt17
Rgs17.1	1.27e-06	-0.824666	0.145	0.305	0.0424019	FB_4	Rgs17
Plpp1	1.35e-06	0.853113	0.485	0.367	0.0450059	FB_4	Plpp1
Jun	1.49e-06	0.662392	0.12	0.048	0.0499017	FB_4	Jun
Frmd4b.1	1.55e-06	-0.768864	0.17	0.33	0.0518174	FB_4	Frmd4b
Bcl2l1.2	1.57e-06	-0.621985	0.12	0.282	0.0526178	FB_4	Bcl2l1
Cpq.1	1.69e-06	-0.511178	0.57	0.718	0.0563907	FB_4	Cpq
Gfpt2.2	1.75e-06	0.884449	0.46	0.327	0.0584122	FB_4	Gfpt2
Fam13c	2.26e-06	-0.656618	0.085	0.229	0.0756554	FB_4	Fam13c
Snrk	2.45e-06	-0.659879	0.135	0.288	0.0819053	FB_4	Snrk
Sema6a	2.59e-06	-0.69979	0.155	0.313	0.0864169	FB_4	Sema6a
Cd44.1	2.68e-06	0.613914	0.13	0.056	0.0894343	FB_4	Cd44
Olfr1033	2.8e-06	0.821892	0.53	0.418	0.0936617	FB_4	Olfr1033
Rem1.1	2.85e-06	-0.678203	0.035	0.155	0.0951052	FB_4	Rem1
Actg1	2.9e-06	0.527668	0.15	0.066	0.097067	FB_4	Actg1
Flrt2.3	3.04e-06	0.67329	0.255	0.143	0.101745	FB_4	Flrt2
Slf2.1	3.05e-06	-0.59867	0.2	0.365	0.102006	FB_4	Slf2
Lbp	3.51e-06	0.474775	0.13	0.055	0.117353	FB_4	Lbp
Wdfy3	3.86e-06	-0.607933	0.235	0.401	0.128982	FB_4	Wdfy3
Nrip1.1	3.9e-06	0.677831	0.465	0.338	0.130468	FB_4	Nrip1
Smc4	4.06e-06	-0.626015	0.045	0.172	0.135831	FB_4	Smc4
Spsb1.1	4.41e-06	0.498233	0.21	0.109	0.14733	FB_4	Spsb1
Hspg2.1	4.46e-06	-0.492421	0.325	0.507	0.148919	FB_4	Hspg2
1700025G04Rik	4.58e-06	0.736394	0.37	0.262	0.153178	FB_4	1700025G04Rik
Arhgef28.2	4.77e-06	0.54737	0.23	0.125	0.159283	FB_4	Arhgef28
Gk5.1	5.01e-06	-0.647234	0.225	0.39	0.167538	FB_4	Gk5
Gab2.1	5.27e-06	0.422736	0.91	0.871	0.176175	FB_4	Gab2
4930590L20Rik	5.51e-06	0.826119	0.265	0.162	0.184136	FB_4	4930590L20Rik
Egfr.1	5.58e-06	-0.529984	0.53	0.66	0.186437	FB_4	Egfr
Cdk8	5.8e-06	-0.352541	0.59	0.752	0.193807	FB_4	Cdk8
Tspan18.1	6.68e-06	0.342693	0.13	0.056	0.223126	FB_4	Tspan18
Jak1	7.32e-06	-0.57295	0.205	0.368	0.244763	FB_4	Jak1
Rbm28	7.88e-06	-0.580233	0.08	0.214	0.263501	FB_4	Rbm28
Agap1.1	7.92e-06	-0.649262	0.26	0.424	0.264611	FB_4	Agap1
Fam49a.1	8.28e-06	-0.623187	0.21	0.367	0.276805	FB_4	Fam49a
Gas7.1	8.69e-06	0.597369	0.38	0.249	0.290462	FB_4	Gas7
Jund	8.85e-06	0.408079	0.165	0.08	0.295678	FB_4	Jund
Ehbp1.1	9.07e-06	0.516545	0.605	0.489	0.303285	FB_4	Ehbp1
Slc24a3.1	9.21e-06	-0.759743	0.08	0.208	0.307829	FB_4	Slc24a3
Ifi207.2	9.42e-06	-0.601551	0.12	0.261	0.314764	FB_4	Ifi207
Pcolce2.2	9.58e-06	-0.614816	0.095	0.232	0.320349	FB_4	Pcolce2
Pdlim5.2	9.99e-06	0.874472	0.425	0.31	0.334027	FB_4	Pdlim5
Stat3	1.02e-05	0.680161	0.45	0.339	0.341817	FB_4	Stat3
Dhrs3.1	1.03e-05	0.591961	0.135	0.061	0.344838	FB_4	Dhrs3
Mbnl1.1	1.04e-05	0.733195	0.61	0.548	0.347743	FB_4	Mbnl1
Lvrn.3	1.06e-05	-0.877804	0.06	0.18	0.354815	FB_4	Lvrn
Il33	1.08e-05	0.774912	0.145	0.068	0.361707	FB_4	Il33
Pcdh19.1	1.11e-05	-0.936112	0.12	0.25	0.370401	FB_4	Pcdh19
Ptma	1.21e-05	0.688551	0.22	0.124	0.404982	FB_4	Ptma
Zfp36l1.1	1.23e-05	0.651896	0.285	0.175	0.412365	FB_4	Zfp36l1
Epha4	1.28e-05	-0.746473	0.045	0.157	0.428516	FB_4	Epha4
Arap1	1.29e-05	0.413445	0.16	0.077	0.431819	FB_4	Arap1
Arhgap44	1.34e-05	0.450035	0.1	0.04	0.448967	FB_4	Arhgap44
Fbln1.2	1.35e-05	0.516985	0.4	0.273	0.449963	FB_4	Fbln1
Zfpm2.2	1.49e-05	-0.339582	0.815	0.892	0.497294	FB_4	Zfpm2
Prickle2.1	1.84e-05	-0.446349	0.38	0.533	0.613433	FB_4	Prickle2
Ifi205.2	1.96e-05	-0.662649	0.08	0.206	0.655989	FB_4	Ifi205
Sp100.1	2.03e-05	-0.512011	0.17	0.323	0.680033	FB_4	Sp100
Ccbe1	2.06e-05	-0.624851	0.285	0.442	0.687603	FB_4	Ccbe1
Cask	2.2e-05	-0.526231	0.365	0.513	0.735163	FB_4	Cask
Mid1.1	2.24e-05	-0.521692	0.55	0.665	0.747223	FB_4	Mid1
Rbfox1.2	2.27e-05	0.40668	0.105	0.244	0.759666	FB_4	Rbfox1
Sbf2	2.27e-05	-0.423725	0.5	0.619	0.759898	FB_4	Sbf2
Tln2	2.42e-05	-0.550566	0.16	0.308	0.809967	FB_4	Tln2
Lmna	2.44e-05	0.880265	0.235	0.142	0.817051	FB_4	Lmna
Arhgap42.2	2.71e-05	-0.561198	0.29	0.448	0.90587	FB_4	Arhgap42
Necab1	2.72e-05	-0.758055	0.09	0.214	0.910424	FB_4	Necab1
Smad6.1	2.78e-05	0.357466	0.11	0.047	0.928774	FB_4	Smad6
Lhfpl2.1	2.82e-05	0.594202	0.205	0.114	0.942304	FB_4	Lhfpl2
Map2	2.88e-05	-0.619034	0.1	0.227	0.964134	FB_4	Map2
Eya2.3	3.11e-05	-0.577731	0.19	0.337	1	FB_4	Eya2
Pde4b.1	3.12e-05	0.649687	0.235	0.133	1	FB_4	Pde4b
Sbds	3.18e-05	0.487264	0.135	0.065	1	FB_4	Sbds
Meis2.1	3.2e-05	-0.609588	0.315	0.466	1	FB_4	Meis2
Ggt5.2	3.37e-05	-0.717649	0.08	0.194	1	FB_4	Ggt5
Plpp3	3.42e-05	0.810051	0.535	0.434	1	FB_4	Plpp3
Rgma.2	3.64e-05	-0.630753	0.185	0.317	1	FB_4	Rgma
Aldh1a2.3	3.75e-05	-0.678277	0.035	0.137	1	FB_4	Aldh1a2
Arhgef10	3.82e-05	0.488121	0.265	0.161	1	FB_4	Arhgef10
Tns1.2	3.82e-05	0.614605	0.36	0.253	1	FB_4	Tns1
Plekhm2.2	3.95e-05	0.429259	0.22	0.125	1	FB_4	Plekhm2
Sfrp1	3.96e-05	0.47309	0.15	0.075	1	FB_4	Sfrp1
Limd1	3.98e-05	-0.543989	0.105	0.232	1	FB_4	Limd1
Sipa1l1.1	4.11e-05	0.531559	0.195	0.108	1	FB_4	Sipa1l1
Zfp592	4.29e-05	-0.576172	0.215	0.361	1	FB_4	Zfp592
Mpp7.1	4.47e-05	0.933081	0.21	0.126	1	FB_4	Mpp7
Adap2os.2	4.7e-05	-0.648928	0.05	0.157	1	FB_4	Adap2os
Bbs9	4.75e-05	0.492508	0.405	0.284	1	FB_4	Bbs9
Spred1.2	4.78e-05	-0.48185	0.215	0.362	1	FB_4	Spred1
Egflam	4.8e-05	0.474288	0.11	0.048	1	FB_4	Egflam
Galnt16.2	4.81e-05	-0.616868	0.025	0.12	1	FB_4	Galnt16
Mecom.1	5.02e-05	-0.362465	0.735	0.844	1	FB_4	Mecom
Il6ra.1	5.14e-05	-0.614116	0.05	0.155	1	FB_4	Il6ra
Zfp462.1	5.35e-05	0.624462	0.27	0.172	1	FB_4	Zfp462
Fndc3a.2	5.35e-05	-0.556132	0.4	0.521	1	FB_4	Fndc3a
Dab2.1	5.42e-05	0.629581	0.305	0.202	1	FB_4	Dab2
Tgfb3	5.51e-05	0.442704	0.135	0.065	1	FB_4	Tgfb3
Fstl1.3	6.41e-05	0.572096	0.65	0.571	1	FB_4	Fstl1
Man1a.2	6.55e-05	-0.584985	0.41	0.53	1	FB_4	Man1a
Galnt1	7.19e-05	-0.538276	0.09	0.208	1	FB_4	Galnt1
Slc1a5.1	7.25e-05	-0.444937	0.355	0.511	1	FB_4	Slc1a5
Pdlim1	7.42e-05	-0.426223	0.04	0.139	1	FB_4	Pdlim1
Arhgap24.3	7.62e-05	-0.366901	0.62	0.735	1	FB_4	Arhgap24
Pam.2	7.83e-05	0.429295	0.755	0.722	1	FB_4	Pam
St5.1	8.14e-05	-0.447604	0.39	0.523	1	FB_4	St5
Sntb2	8.93e-05	-0.453682	0.41	0.548	1	FB_4	Sntb2
Sdc2.1	9.05e-05	-0.401473	0.53	0.675	1	FB_4	Sdc2
Zswim4	9.43e-05	0.399603	0.105	0.047	1	FB_4	Zswim4
Ets1	9.62e-05	-0.587158	0.11	0.227	1	FB_4	Ets1
Hhat	9.81e-05	0.4486	0.125	0.06	1	FB_4	Hhat
Cp.2	0.000101729	-0.317047	0.32	0.469	1	FB_4	Cp
Rian	0.000103504	-0.588632	0.13	0.251	1	FB_4	Rian
Nt5dc3	0.00010368	0.614326	0.11	0.051	1	FB_4	Nt5dc3
Clic4	0.000108269	0.629541	0.34	0.237	1	FB_4	Clic4
Ubash3b.1	0.000111397	0.39122	0.185	0.101	1	FB_4	Ubash3b
Nid2	0.000111476	-0.544013	0.035	0.126	1	FB_4	Nid2
Gli3	0.000111606	-0.448304	0.4	0.549	1	FB_4	Gli3
Itga8.1	0.000118292	-0.636997	0.07	0.173	1	FB_4	Itga8
Ccn1.1	0.000118604	0.776302	0.3	0.202	1	FB_4	Ccn1
Lrrc75a	0.000122881	0.422634	0.125	0.061	1	FB_4	Lrrc75a
Per1	0.000125471	0.394067	0.235	0.141	1	FB_4	Per1
E2f3	0.000134987	-0.585309	0.055	0.15	1	FB_4	E2f3
Arhgap28.1	0.000138995	-0.585612	0.11	0.225	1	FB_4	Arhgap28
Tek.1	0.000140214	-0.459137	0.26	0.403	1	FB_4	Tek
Csrp1	0.00014554	0.87691	0.165	0.093	1	FB_4	Csrp1
Klhdc8b	0.000145628	-0.532747	0.045	0.137	1	FB_4	Klhdc8b
Arid5b.1	0.000156768	0.599738	0.34	0.239	1	FB_4	Arid5b
Tcf4.1	0.000184654	-0.261874	0.855	0.902	1	FB_4	Tcf4
Plekhh2.1	0.000193077	-0.416003	0.3	0.44	1	FB_4	Plekhh2
Akap7	0.000198564	-0.523112	0.105	0.211	1	FB_4	Akap7
Picalm	0.000211915	0.65125	0.525	0.458	1	FB_4	Picalm
Adamtsl4	0.000213255	0.358888	0.14	0.073	1	FB_4	Adamtsl4
Scara5.2	0.000215142	-0.36002	0.26	0.403	1	FB_4	Scara5
Matn2	0.00023824	0.544312	0.405	0.304	1	FB_4	Matn2
Akap12.2	0.000240531	-0.338223	0.285	0.418	1	FB_4	Akap12
Srgap2	0.000245992	-0.358148	0.325	0.47	1	FB_4	Srgap2
Nckap5.3	0.000246618	-0.530378	0.07	0.171	1	FB_4	Nckap5
Sobp	0.000247322	-0.433144	0.395	0.528	1	FB_4	Sobp
Aopep.1	0.000252781	0.638912	0.52	0.443	1	FB_4	Aopep
Kcnn3.1	0.000260777	0.448325	0.165	0.09	1	FB_4	Kcnn3
Gm49959	0.000265028	-0.449407	0.065	0.165	1	FB_4	Gm49959
Sipa1	0.000269391	-0.439523	0.04	0.128	1	FB_4	Sipa1
Vegfc.1	0.000273845	-0.600598	0.175	0.292	1	FB_4	Vegfc
Epas1.1	0.000274826	-0.471042	0.07	0.168	1	FB_4	Epas1
Esrrg	0.000278109	0.556447	0.105	0.049	1	FB_4	Esrrg
Vcan.3	0.000285598	0.415485	0.41	0.303	1	FB_4	Vcan
Plcl2	0.000298157	-0.442698	0.17	0.294	1	FB_4	Plcl2
Prkca.2	0.00030531	0.4014	0.525	0.412	1	FB_4	Prkca
Hlf	0.000309873	-0.522724	0.13	0.245	1	FB_4	Hlf
Ywhaz	0.000317155	0.459761	0.315	0.221	1	FB_4	Ywhaz
Greb1l.1	0.000323601	0.491617	0.42	0.316	1	FB_4	Greb1l
Wasl	0.000359639	-0.443421	0.19	0.309	1	FB_4	Wasl
Tle3	0.000360156	0.456068	0.21	0.129	1	FB_4	Tle3
Psd3.3	0.000371377	-0.340276	0.67	0.754	1	FB_4	Psd3
Thbs3	0.000386315	0.352792	0.15	0.082	1	FB_4	Thbs3
Meg3	0.000390597	-0.409129	0.545	0.662	1	FB_4	Meg3
Ston1	0.000392965	-0.52085	0.13	0.24	1	FB_4	Ston1
Diaph2	0.000395356	-0.342368	0.575	0.689	1	FB_4	Diaph2
Pla2g4a.1	0.000431923	0.614174	0.305	0.212	1	FB_4	Pla2g4a
Ptprk.2	0.000435018	0.721898	0.265	0.175	1	FB_4	Ptprk
Klf4	0.000439383	0.753876	0.125	0.066	1	FB_4	Klf4
Sfxn1	0.000478154	-0.469478	0.05	0.134	1	FB_4	Sfxn1
Tox.2	0.00048299	0.486562	0.215	0.135	1	FB_4	Tox
Cygb.1	0.000486068	0.593551	0.415	0.328	1	FB_4	Cygb
Gm6277.1	0.000496188	0.405759	0.11	0.055	1	FB_4	Gm6277
Cdc42se2	0.000497605	-0.549685	0.075	0.166	1	FB_4	Cdc42se2
9330159F19Rik.1	0.000500842	0.348454	0.1	0.047	1	FB_4	9330159F19Rik
Gucy1a2.2	0.000505415	-0.473216	0.445	0.562	1	FB_4	Gucy1a2
Arl15	0.000509232	-0.32897	0.63	0.735	1	FB_4	Arl15
Crtc3	0.000518651	-0.414423	0.39	0.51	1	FB_4	Crtc3
Arhgap21.1	0.000521441	-0.371384	0.485	0.612	1	FB_4	Arhgap21
2610035D17Rik	0.000530391	-0.393404	0.14	0.252	1	FB_4	2610035D17Rik
9530026P05Rik	0.000538481	0.489374	0.38	0.278	1	FB_4	9530026P05Rik
Msi2.3	0.000540319	-0.390231	0.29	0.428	1	FB_4	Msi2
Pcdh7.3	0.000558902	-0.678867	0.065	0.154	1	FB_4	Pcdh7
Eml4	0.000580606	-0.514845	0.175	0.284	1	FB_4	Eml4
Fxyd6.1	0.000589124	0.43784	0.105	0.052	1	FB_4	Fxyd6
Eng.1	0.000590492	-0.495648	0.075	0.168	1	FB_4	Eng
Ctnna1.2	0.000595749	0.598528	0.25	0.166	1	FB_4	Ctnna1
Vamp2	0.000599919	0.359147	0.18	0.107	1	FB_4	Vamp2
Castor2	0.000604252	0.42205	0.125	0.066	1	FB_4	Castor2
Ifngr1	0.000632373	-0.489719	0.145	0.25	1	FB_4	Ifngr1
Mpdz	0.000663705	-0.356833	0.345	0.463	1	FB_4	Mpdz
Egr3	0.000664623	0.532306	0.1	0.049	1	FB_4	Egr3
Hipk3	0.000667713	0.59015	0.29	0.208	1	FB_4	Hipk3
Nova1.1	0.000672715	-0.387037	0.1	0.199	1	FB_4	Nova1
Lrrk2.1	0.000680481	0.580985	0.245	0.166	1	FB_4	Lrrk2
Clmp	0.000704156	-0.483312	0.225	0.339	1	FB_4	Clmp
Ms4a4d.1	0.000719372	-0.364936	0.19	0.307	1	FB_4	Ms4a4d
Igf1r.1	0.000732005	-0.341196	0.615	0.687	1	FB_4	Igf1r
Cebpb	0.000777615	0.321461	0.11	0.056	1	FB_4	Cebpb
Glcci1	0.000778641	-0.559705	0.115	0.213	1	FB_4	Glcci1
Mitf.3	0.000780559	0.429556	0.155	0.088	1	FB_4	Mitf
Gem	0.00079534	0.397941	0.17	0.1	1	FB_4	Gem
Chrm3.4	0.000796269	-0.854453	0.03	0.102	1	FB_4	Chrm3
Kcnab1.1	0.000802287	0.626348	0.115	0.06	1	FB_4	Kcnab1
Zfp644	0.000802558	-0.355543	0.2	0.319	1	FB_4	Zfp644
Rbm6	0.000804569	-0.384531	0.375	0.495	1	FB_4	Rbm6
Klhl29.2	0.00081077	0.431566	0.19	0.117	1	FB_4	Klhl29
Anks1b.1	0.000812276	-0.349605	0.115	0.22	1	FB_4	Anks1b
Stard13.1	0.000815219	-0.506148	0.18	0.291	1	FB_4	Stard13
Plod2.1	0.000815297	0.632346	0.34	0.257	1	FB_4	Plod2
Dnajc3	0.000836279	0.396957	0.215	0.136	1	FB_4	Dnajc3
Vav2	0.000915986	0.41476	0.16	0.094	1	FB_4	Vav2
Rab43	0.000916216	0.364799	0.17	0.1	1	FB_4	Rab43
Ranbp9	0.00092632	-0.377542	0.22	0.342	1	FB_4	Ranbp9
Elmo1.1	0.000963442	0.313969	0.72	0.674	1	FB_4	Elmo1
Srebf2	0.000968826	0.473011	0.23	0.152	1	FB_4	Srebf2
Rps16	0.000989842	0.3185	0.105	0.053	1	FB_4	Rps16
Ankfy1	0.00101658	-0.438247	0.135	0.238	1	FB_4	Ankfy1
Gm14964.1	0.00105455	-0.498623	0.035	0.107	1	FB_4	Gm14964
Ddx17	0.00105461	-0.366667	0.465	0.566	1	FB_4	Ddx17
Nxn.1	0.00105866	-0.396511	0.25	0.368	1	FB_4	Nxn
Med13l	0.00106472	0.356291	0.515	0.429	1	FB_4	Med13l
Adamts12.3	0.00109077	0.402317	0.5	0.419	1	FB_4	Adamts12
Abtb2	0.00110825	0.346885	0.11	0.056	1	FB_4	Abtb2
Smc5	0.00111155	-0.393697	0.18	0.291	1	FB_4	Smc5
Map3k14	0.00111299	-0.393811	0.095	0.188	1	FB_4	Map3k14
Saraf	0.00112309	0.55297	0.1	0.05	1	FB_4	Saraf
Klf7	0.00112505	0.457519	0.545	0.468	1	FB_4	Klf7
Kdm5b	0.00112686	-0.341504	0.15	0.26	1	FB_4	Kdm5b
Ptk2.1	0.00113462	-0.33102	0.35	0.475	1	FB_4	Ptk2
Thbs2	0.00117682	-0.451996	0.055	0.134	1	FB_4	Thbs2
Tshz3.1	0.00120911	-0.39403	0.41	0.513	1	FB_4	Tshz3
Prkg1.3	0.00121017	-0.430048	0.635	0.711	1	FB_4	Prkg1
Gm36535.1	0.00122348	-0.416744	0.225	0.335	1	FB_4	Gm36535
Col15a1.2	0.00122587	-0.347548	0.495	0.618	1	FB_4	Col15a1
Pdpk1	0.00128516	-0.433169	0.115	0.212	1	FB_4	Pdpk1
Nr6a1.1	0.00129205	-0.495262	0.165	0.265	1	FB_4	Nr6a1
Mapk1	0.00130209	-0.371078	0.155	0.26	1	FB_4	Mapk1
Gucy1a1.2	0.00133959	0.419968	0.22	0.14	1	FB_4	Gucy1a1
Clip2	0.0013428	-0.318363	0.13	0.233	1	FB_4	Clip2
Piezo1	0.00134723	0.545381	0.165	0.101	1	FB_4	Piezo1
Adgre5	0.00137159	-0.459187	0.065	0.145	1	FB_4	Adgre5
Id3.1	0.00140552	0.390881	0.13	0.072	1	FB_4	Id3
Ncald.1	0.00141402	-0.493083	0.21	0.313	1	FB_4	Ncald
Il6st.1	0.00153278	0.394395	0.395	0.307	1	FB_4	Il6st
Usp53	0.00153994	0.379652	0.115	0.062	1	FB_4	Usp53
Pknox2.1	0.00156504	0.423754	0.52	0.445	1	FB_4	Pknox2
Ltbp3.1	0.00157449	0.394303	0.18	0.114	1	FB_4	Ltbp3
Sik2	0.00158601	0.388718	0.395	0.308	1	FB_4	Sik2
Sppl3	0.00159068	-0.4311	0.155	0.259	1	FB_4	Sppl3
Tpm4	0.00161552	0.500939	0.27	0.195	1	FB_4	Tpm4
Gm9947.1	0.00161685	-0.501712	0.04	0.108	1	FB_4	Gm9947
Pik3ca	0.00167041	-0.43331	0.205	0.309	1	FB_4	Pik3ca
Shroom4.1	0.00167863	0.606157	0.165	0.102	1	FB_4	Shroom4
Slfn5	0.00168706	-0.450751	0.13	0.229	1	FB_4	Slfn5
Jag1	0.00171885	0.418924	0.2	0.129	1	FB_4	Jag1
Camta1.1	0.00177116	0.360764	0.13	0.072	1	FB_4	Camta1
Micu2	0.00177539	-0.402838	0.07	0.153	1	FB_4	Micu2
Numb	0.00179623	-0.301972	0.255	0.374	1	FB_4	Numb
Dchs2.2	0.00181639	-0.435459	0.11	0.202	1	FB_4	Dchs2
Cd9.1	0.00186171	0.373021	0.145	0.086	1	FB_4	Cd9
4933406I18Rik.1	0.00191224	0.420572	0.11	0.059	1	FB_4	4933406I18Rik
Pmp22	0.00192556	0.569345	0.335	0.263	1	FB_4	Pmp22
Rps12	0.001936	0.360201	0.13	0.073	1	FB_4	Rps12
Ifi211.1	0.00194349	-0.447279	0.04	0.108	1	FB_4	Ifi211
Tnik.1	0.00205821	-0.484842	0.465	0.554	1	FB_4	Tnik
Crim1	0.00206026	-0.376958	0.11	0.203	1	FB_4	Crim1
Plekha4	0.00207494	0.441828	0.16	0.099	1	FB_4	Plekha4
Mapkapk2	0.00209884	0.344554	0.15	0.09	1	FB_4	Mapkapk2
Rnf150.1	0.00211039	-0.457675	0.32	0.428	1	FB_4	Rnf150
Rcsd1	0.00215739	-0.456965	0.055	0.128	1	FB_4	Rcsd1
Tgfbr3.1	0.00217168	-0.353249	0.53	0.618	1	FB_4	Tgfbr3
Col1a1	0.00218911	0.393914	0.32	0.233	1	FB_4	Col1a1
Kansl3	0.00224004	-0.368006	0.055	0.129	1	FB_4	Kansl3
Arnt	0.00228163	-0.263642	0.24	0.357	1	FB_4	Arnt
Nfib.1	0.00228718	0.319721	0.855	0.823	1	FB_4	Nfib
Lrp4	0.00231334	-0.476577	0.065	0.139	1	FB_4	Lrp4
Fndc3b.1	0.00232312	-0.253178	0.785	0.828	1	FB_4	Fndc3b
Nt5c2	0.00236019	0.452539	0.315	0.24	1	FB_4	Nt5c2
Sfi1	0.00237756	0.402447	0.185	0.12	1	FB_4	Sfi1
Smarca5	0.00238947	0.380657	0.215	0.141	1	FB_4	Smarca5
Lncpint	0.00241353	-0.294263	0.67	0.741	1	FB_4	Lncpint
Ppp2r2d	0.0024259	0.326565	0.21	0.139	1	FB_4	Ppp2r2d
Arhgap31.1	0.00242984	-0.364795	0.09	0.176	1	FB_4	Arhgap31
Pdgfd.1	0.00243322	0.522662	0.17	0.106	1	FB_4	Pdgfd
Arhgap18	0.00243817	-0.422104	0.08	0.161	1	FB_4	Arhgap18
Rsu1	0.00252673	-0.396371	0.345	0.444	1	FB_4	Rsu1
Pdgfrl.1	0.00266995	0.363034	0.12	0.067	1	FB_4	Pdgfrl
Far1	0.00267473	-0.378464	0.16	0.257	1	FB_4	Far1
Oasl2	0.00267782	-0.350653	0.04	0.108	1	FB_4	Oasl2
Kdm1a	0.00269789	-0.409795	0.08	0.158	1	FB_4	Kdm1a
Pde7b.3	0.00270434	-0.502358	0.135	0.223	1	FB_4	Pde7b
Dnaja2	0.00271969	0.381307	0.14	0.083	1	FB_4	Dnaja2
Cacna1d	0.00273774	-0.383915	0.1	0.188	1	FB_4	Cacna1d
[truncated: 511 more rows]

## Sheet: all.markers_EC
	p_val	avg_log2FC	pct.1	pct.2	p_val_adj	cluster	gene
Rgs5	2.74e-299	1.30225	0.157	0.025	9.16e-295	EC_0	Rgs5
AW112010	3.5e-140	0.418601	0.123	0.036	1.17e-135	EC_0	AW112010
Cobl	3.35e-294	0.783564	0.254	0.077	1.12e-289	EC_0	Cobl
Sox18	1.48e-167	0.533494	0.156	0.05	4.96e-163	EC_0	Sox18
Nos2	1.45e-122	0.32218	0.121	0.039	4.85e-118	EC_0	Nos2
Kit	1.58e-142	0.530606	0.136	0.044	5.29e-138	EC_0	Kit
A730049H05Rik	5.11e-135	0.465186	0.134	0.044	1.71e-130	EC_0	A730049H05Rik
Prdm1	9.71e-115	0.346881	0.117	0.039	3.25e-110	EC_0	Prdm1
Car4	1.22e-145	0.38957	0.154	0.052	4.08e-141	EC_0	Car4
Plekhh2	2.05e-124	0.376665	0.138	0.049	6.86e-120	EC_0	Plekhh2
Actg1	8.31e-181	0.541512	0.205	0.074	2.78e-176	EC_0	Actg1
Col15a1	3.73e-130	0.512224	0.144	0.052	1.25e-125	EC_0	Col15a1
Rsad2	4.26e-161	0.530672	0.179	0.065	1.42e-156	EC_0	Rsad2
Nes	3.65e-134	0.393921	0.154	0.056	1.22e-129	EC_0	Nes
Mmd	1.28e-96	0.290289	0.115	0.042	4.28e-92	EC_0	Mmd
Fscn1	4.23e-120	0.388788	0.14	0.052	1.41e-115	EC_0	Fscn1
Cfl1	9.37e-112	0.306563	0.136	0.051	3.13e-107	EC_0	Cfl1
Kctd12b	4.6e-156	0.55025	0.183	0.069	1.54e-151	EC_0	Kctd12b
Ccnd1	1.64e-107	0.378292	0.127	0.048	5.49e-103	EC_0	Ccnd1
2610203C22Rik	4.64e-128	0.523078	0.155	0.059	1.55e-123	EC_0	2610203C22Rik
Tbx3	3.95e-95	0.32821	0.118	0.045	1.32e-90	EC_0	Tbx3
Aplnr	2.21e-168	0.505158	0.205	0.079	7.4e-164	EC_0	Aplnr
Tnfrsf21	1.4e-130	0.428407	0.164	0.064	4.67e-126	EC_0	Tnfrsf21
Efnb1	2.64e-94	0.284118	0.123	0.048	8.83e-90	EC_0	Efnb1
Tcf15	5.93e-173	0.499289	0.215	0.084	1.98e-168	EC_0	Tcf15
Papln	2.02e-125	0.359812	0.164	0.065	6.75e-121	EC_0	Papln
BC028528	3.58e-84	0.273028	0.113	0.045	1.2e-79	EC_0	BC028528
Cd274	4.42e-75	0.272627	0.102	0.041	1.48e-70	EC_0	Cd274
Lamb1	6.26e-164	0.472162	0.216	0.087	2.09e-159	EC_0	Lamb1
Cyp4b1	2.24e-134	0.392834	0.181	0.073	7.49e-130	EC_0	Cyp4b1
Xylt1	9.17e-123	0.391446	0.166	0.067	3.06e-118	EC_0	Xylt1
Fam43a	2.78e-158	0.444243	0.209	0.085	9.28e-154	EC_0	Fam43a
Arap2	1.39e-183	0.468216	0.252	0.104	4.65e-179	EC_0	Arap2
Ptp4a3	5.01e-112	0.292445	0.163	0.068	1.68e-107	EC_0	Ptp4a3
Rflnb	1.2e-158	0.504187	0.22	0.092	4e-154	EC_0	Rflnb
Ift122	5e-73	0.336604	0.1	0.042	1.67e-68	EC_0	Ift122
Ccdc85b	6.43e-92	0.328406	0.133	0.056	2.15e-87	EC_0	Ccdc85b
Ptger4	3.25e-85	0.322634	0.121	0.051	1.08e-80	EC_0	Ptger4
Sdc3	1.34e-115	0.322188	0.166	0.07	4.48e-111	EC_0	Sdc3
Pde4b	9.55e-74	0.392482	0.104	0.044	3.19e-69	EC_0	Pde4b
Adam19	1.61e-155	0.532893	0.217	0.092	5.37e-151	EC_0	Adam19
Pcdh1	2.67e-109	0.291341	0.162	0.069	8.92e-105	EC_0	Pcdh1
C1qtnf9	1.61e-156	0.44103	0.223	0.095	5.38e-152	EC_0	C1qtnf9
Sparc	1.61e-291	0.772649	0.367	0.157	5.39e-287	EC_0	Sparc
Ubb	2.64e-125	0.439431	0.182	0.078	8.82e-121	EC_0	Ubb
Rps20	6.28e-112	0.415413	0.167	0.072	2.1e-107	EC_0	Rps20
Slc1a1	1.14e-66	0.274952	0.102	0.044	3.81e-62	EC_0	Slc1a1
St8sia4	0	0.800741	0.493	0.213	0	EC_0	St8sia4
Aqp7	5.24e-149	0.411832	0.222	0.096	1.75e-144	EC_0	Aqp7
Cd247	4.81e-91	0.349192	0.143	0.063	1.61e-86	EC_0	Cd247
Papss2	6.01e-182	0.500784	0.279	0.123	2.01e-177	EC_0	Papss2
Gda	3.37e-116	0.392297	0.184	0.082	1.13e-111	EC_0	Gda
Ets2	6.55e-264	0.611575	0.381	0.17	2.19e-259	EC_0	Ets2
Jam3	1.97e-236	0.52649	0.362	0.162	6.58e-232	EC_0	Jam3
Serpinh1	3.4e-79	0.258653	0.127	0.057	1.14e-74	EC_0	Serpinh1
Bst2	2.55e-81	0.289747	0.133	0.06	8.52e-77	EC_0	Bst2
Rhoc	1.6e-85	0.28376	0.144	0.065	5.36e-81	EC_0	Rhoc
St3gal5	4e-82	0.298071	0.138	0.063	1.34e-77	EC_0	St3gal5
Cd81	8.91e-187	0.605025	0.286	0.131	2.98e-182	EC_0	Cd81
Gja1	1.54e-109	0.372736	0.189	0.087	5.15e-105	EC_0	Gja1
Sema7a	2.34e-119	0.339706	0.21	0.097	7.8e-115	EC_0	Sema7a
Sparcl1	0	0.767859	0.51	0.236	0	EC_0	Sparcl1
Pea15a	1.89e-83	0.279009	0.142	0.066	6.3e-79	EC_0	Pea15a
Rps23	8.16e-89	0.305805	0.159	0.074	2.73e-84	EC_0	Rps23
Zfp827	7.8e-122	0.388206	0.208	0.097	2.61e-117	EC_0	Zfp827
Gpihbp1	7.6e-299	0.639184	0.463	0.216	2.54e-294	EC_0	Gpihbp1
Gm12002	2.02e-265	0.77291	0.407	0.19	6.76e-261	EC_0	Gm12002
Rps16	2.45e-76	0.273707	0.139	0.065	8.18e-72	EC_0	Rps16
Cabp1	8.22e-70	0.266701	0.124	0.058	2.75e-65	EC_0	Cabp1
Dusp6	1.08e-65	0.253086	0.115	0.054	3.59e-61	EC_0	Dusp6
Lpl	2.18e-141	0.463323	0.24	0.113	7.3e-137	EC_0	Lpl
Ifitm3	2.78e-126	0.526667	0.214	0.101	9.3e-122	EC_0	Ifitm3
Tmem123	4.94e-89	0.292272	0.163	0.077	1.65e-84	EC_0	Tmem123
4921511C10Rik	9.99e-71	0.353474	0.127	0.06	3.34e-66	EC_0	4921511C10Rik
Dcbld1	2.58e-209	0.572756	0.348	0.165	8.63e-205	EC_0	Dcbld1
Calm1	4.19e-187	0.629242	0.301	0.143	1.4e-182	EC_0	Calm1
Nrros	5.25e-90	0.310436	0.162	0.077	1.75e-85	EC_0	Nrros
Adgrg1	1.2e-135	0.333153	0.254	0.121	4.02e-131	EC_0	Adgrg1
Gstt2	1.71e-94	0.310967	0.172	0.082	5.72e-90	EC_0	Gstt2
Cdh23	4.23e-178	0.430169	0.326	0.156	1.41e-173	EC_0	Cdh23
Rpl19	5.13e-88	0.295818	0.165	0.079	1.71e-83	EC_0	Rpl19
Asxl3	9.52e-73	0.319005	0.135	0.065	3.18e-68	EC_0	Asxl3
Lpar6	5.34e-90	0.310869	0.168	0.081	1.78e-85	EC_0	Lpar6
Ephb1	1.51e-160	0.499331	0.29	0.14	5.05e-156	EC_0	Ephb1
Cldn5	3.41e-129	0.472554	0.24	0.116	1.14e-124	EC_0	Cldn5
Cxcl12	0	1.05235	0.438	0.212	0	EC_0	Cxcl12
Vwa3a	4.18e-161	0.430558	0.301	0.146	1.4e-156	EC_0	Vwa3a
Rgcc	4.46e-284	0.584964	0.484	0.236	1.49e-279	EC_0	Rgcc
Cdc42ep1	1.09e-88	0.269	0.174	0.085	3.66e-84	EC_0	Cdc42ep1
Nus1	1.2e-104	0.341151	0.206	0.101	4.03e-100	EC_0	Nus1
Btnl9	4.8e-259	0.553834	0.466	0.229	1.61e-254	EC_0	Btnl9
Pcdh12	3.11e-75	0.252437	0.152	0.075	1.04e-70	EC_0	Pcdh12
Cav2	3.34e-99	0.389415	0.186	0.092	1.12e-94	EC_0	Cav2
Gm48383	5.95e-51	0.269204	0.103	0.051	1.99e-46	EC_0	Gm48383
Cavin1	3.88e-155	0.520831	0.286	0.142	1.3e-150	EC_0	Cavin1
9630014M24Rik	6.12e-58	0.322561	0.118	0.059	2.05e-53	EC_0	9630014M24Rik
Tpt1	9.08e-148	0.561626	0.281	0.141	3.03e-143	EC_0	Tpt1
Trp53i11	1.03e-132	0.39825	0.267	0.134	3.45e-128	EC_0	Trp53i11
Jup	1.09e-129	0.383427	0.261	0.131	3.63e-125	EC_0	Jup
Dll4	3.12e-77	0.250328	0.167	0.084	1.04e-72	EC_0	Dll4
Mcam	1.99e-68	0.28301	0.143	0.072	6.67e-64	EC_0	Mcam
Ly6c1	1.2e-142	0.492692	0.282	0.142	4.01e-138	EC_0	Ly6c1
Gm14211	7.42e-142	0.49274	0.278	0.14	2.48e-137	EC_0	Gm14211
Sox7	3.1e-84	0.303173	0.172	0.087	1.04e-79	EC_0	Sox7
Ldlrad3	8.76e-171	0.445978	0.34	0.172	2.93e-166	EC_0	Ldlrad3
Gng11	1.44e-160	0.543678	0.306	0.155	4.8e-156	EC_0	Gng11
Smco4	1.53e-146	0.385873	0.304	0.154	5.11e-142	EC_0	Smco4
Gm29007	1.07e-69	0.255757	0.148	0.075	3.58e-65	EC_0	Gm29007
Bcl6b	1.24e-181	0.473659	0.355	0.18	4.14e-177	EC_0	Bcl6b
Csrp1	3.7e-66	0.258553	0.14	0.071	1.24e-61	EC_0	Csrp1
Rpl23	4.21e-90	0.310251	0.195	0.099	1.41e-85	EC_0	Rpl23
Dusp3	1.87e-194	0.508184	0.369	0.188	6.25e-190	EC_0	Dusp3
Pdgfb	3.86e-236	0.498294	0.459	0.234	1.29e-231	EC_0	Pdgfb
Ptma	1.64e-190	0.599784	0.353	0.18	5.46e-186	EC_0	Ptma
Rpl35a	3.21e-74	0.268825	0.166	0.085	1.07e-69	EC_0	Rpl35a
Cd300lg	8.65e-281	0.560052	0.521	0.267	2.89e-276	EC_0	Cd300lg
Timp4	1.39e-72	0.250625	0.16	0.082	4.65e-68	EC_0	Timp4
Dgkd	1.05e-174	0.487297	0.349	0.179	3.53e-170	EC_0	Dgkd
Enah	1.1e-87	0.355334	0.193	0.099	3.68e-83	EC_0	Enah
Myadm	4.27e-126	0.491212	0.261	0.134	1.43e-121	EC_0	Myadm
Tcim	2.21e-221	0.528845	0.442	0.227	7.38e-217	EC_0	Tcim
Lnx1	1.07e-294	0.5892	0.551	0.283	3.59e-290	EC_0	Lnx1
4930523C07Rik	3e-195	0.483945	0.403	0.208	1e-190	EC_0	4930523C07Rik
Ifngr1	1.26e-96	0.301883	0.211	0.109	4.22e-92	EC_0	Ifngr1
Zfp36	9.6e-79	0.322013	0.178	0.092	3.21e-74	EC_0	Zfp36
Cd34	5.59e-157	0.469271	0.321	0.166	1.87e-152	EC_0	Cd34
Nid2	1.01e-51	0.274258	0.11	0.057	3.38e-47	EC_0	Nid2
Prag1	6.5e-125	0.355224	0.272	0.141	2.17e-120	EC_0	Prag1
Sybu	1.15e-184	0.531488	0.377	0.196	3.83e-180	EC_0	Sybu
Zfp710	2.03e-197	0.514554	0.403	0.21	6.77e-193	EC_0	Zfp710
Tspan14	1.95e-104	0.343121	0.232	0.121	6.51e-100	EC_0	Tspan14
Mfsd4a	4.71e-89	0.347659	0.197	0.103	1.58e-84	EC_0	Mfsd4a
Rpl27a	3.08e-74	0.277668	0.172	0.09	1.03e-69	EC_0	Rpl27a
Cmtm8	3.74e-104	0.322508	0.244	0.128	1.25e-99	EC_0	Cmtm8
Slc12a2	1.24e-69	0.273705	0.162	0.085	4.16e-65	EC_0	Slc12a2
H3f3a	6.31e-88	0.31789	0.198	0.104	2.11e-83	EC_0	H3f3a
Cd38	9.27e-132	0.399279	0.291	0.153	3.1e-127	EC_0	Cd38
Fabp5	1.55e-85	0.392002	0.188	0.099	5.18e-81	EC_0	Fabp5
Lrrc3b	9.69e-81	0.296594	0.188	0.099	3.24e-76	EC_0	Lrrc3b
Nin	2.98e-94	0.355351	0.212	0.112	9.96e-90	EC_0	Nin
Map3k5	6.56e-180	0.431037	0.403	0.213	2.19e-175	EC_0	Map3k5
Eef1a1	1.16e-131	0.537817	0.272	0.144	3.86e-127	EC_0	Eef1a1
Fam78b	4.15e-131	0.403703	0.298	0.158	1.39e-126	EC_0	Fam78b
4930578C19Rik	2.79e-50	0.255921	0.115	0.061	9.31e-46	EC_0	4930578C19Rik
Lysmd4	4.72e-94	0.394763	0.213	0.113	1.58e-89	EC_0	Lysmd4
Sgk1	2.71e-195	0.479497	0.427	0.227	9.06e-191	EC_0	Sgk1
Jund	1.05e-77	0.297528	0.186	0.099	3.5e-73	EC_0	Jund
Tnfaip1	2.44e-109	0.314391	0.259	0.138	8.16e-105	EC_0	Tnfaip1
Disp1	1.83e-58	0.28627	0.137	0.073	6.1e-54	EC_0	Disp1
Fam198b	2.14e-51	0.368486	0.118	0.063	7.17e-47	EC_0	Fam198b
Scarb1	4.15e-121	0.324764	0.294	0.157	1.39e-116	EC_0	Scarb1
Igfbp7	0	0.771929	0.574	0.307	0	EC_0	Igfbp7
Map1b	3.41e-102	0.477294	0.228	0.122	1.14e-97	EC_0	Map1b
Tmsb4x	1.53e-306	1.10296	0.482	0.258	5.13e-302	EC_0	Tmsb4x
9630028H03Rik	5.09e-59	0.349391	0.14	0.075	1.7e-54	EC_0	9630028H03Rik
Cecr2	3.13e-123	0.352208	0.302	0.162	1.05e-118	EC_0	Cecr2
Galnt15	2.34e-113	0.324807	0.274	0.147	7.83e-109	EC_0	Galnt15
Baz1a	8.03e-66	0.286924	0.158	0.085	2.68e-61	EC_0	Baz1a
Pcdh17	3e-180	0.659618	0.376	0.203	1e-175	EC_0	Pcdh17
Gimap4	1.6e-90	0.275414	0.224	0.121	5.35e-86	EC_0	Gimap4
Prkcg	5.08e-112	0.411089	0.268	0.145	1.7e-107	EC_0	Prkcg
Dlg2	6.19e-171	0.828642	0.332	0.18	2.07e-166	EC_0	Dlg2
Id1	1.96e-180	0.554455	0.402	0.218	6.53e-176	EC_0	Id1
H3f3b	4.66e-134	0.429513	0.315	0.171	1.56e-129	EC_0	H3f3b
Sh3tc2	3.58e-98	0.344464	0.245	0.133	1.2e-93	EC_0	Sh3tc2
Hes1	4.72e-68	0.262049	0.173	0.094	1.58e-63	EC_0	Hes1
Ybx1	4.82e-109	0.350893	0.265	0.144	1.61e-104	EC_0	Ybx1
Ppia	3.67e-64	0.293994	0.158	0.086	1.23e-59	EC_0	Ppia
Gimap6	4.26e-206	0.485388	0.46	0.251	1.42e-201	EC_0	Gimap6
Ctnnbip1	1.84e-101	0.268133	0.262	0.143	6.16e-97	EC_0	Ctnnbip1
Myct1	1.38e-123	0.385534	0.298	0.163	4.61e-119	EC_0	Myct1
Pik3cb	1.79e-101	0.32185	0.254	0.139	5.99e-97	EC_0	Pik3cb
Arpc3	1.99e-92	0.277708	0.239	0.131	6.65e-88	EC_0	Arpc3
Siah1a	5.67e-82	0.283721	0.213	0.117	1.9e-77	EC_0	Siah1a
Hnrnpf	1.01e-103	0.341717	0.263	0.145	3.37e-99	EC_0	Hnrnpf
Tpm4	2.5e-122	0.400075	0.301	0.167	8.36e-118	EC_0	Tpm4
Arhgap28	6e-124	0.373508	0.319	0.177	2.01e-119	EC_0	Arhgap28
Rab6a	5.12e-77	0.283473	0.205	0.114	1.71e-72	EC_0	Rab6a
Arhgef7	4.54e-102	0.315902	0.271	0.151	1.52e-97	EC_0	Arhgef7
Slc25a25	3.22e-74	0.297516	0.199	0.111	1.08e-69	EC_0	Slc25a25
Pik3r6	3e-111	0.322133	0.299	0.167	1e-106	EC_0	Pik3r6
Rhob	7.67e-78	0.292991	0.213	0.119	2.56e-73	EC_0	Rhob
Mxd4	2.32e-84	0.293354	0.229	0.128	7.75e-80	EC_0	Mxd4
Gnai2	2.93e-117	0.359599	0.304	0.17	9.79e-113	EC_0	Gnai2
Btg2	1.47e-126	0.388662	0.339	0.19	4.91e-122	EC_0	Btg2
Col4a2	0	0.693831	0.719	0.403	0	EC_0	Col4a2
Tmem204	1.54e-134	0.373146	0.346	0.194	5.15e-130	EC_0	Tmem204
Samd4	1.62e-66	0.387805	0.18	0.101	5.4e-62	EC_0	Samd4
Efr3b	1.25e-142	0.372034	0.392	0.22	4.16e-138	EC_0	Efr3b
Ier2	2.39e-84	0.300926	0.242	0.136	7.98e-80	EC_0	Ier2
Rps24	1.66e-73	0.301467	0.204	0.115	5.55e-69	EC_0	Rps24
Rnf144a	1.1e-146	0.403743	0.388	0.219	3.68e-142	EC_0	Rnf144a
Actb	8.03e-216	0.695959	0.457	0.258	2.69e-211	EC_0	Actb
Jun	2.11e-66	0.258393	0.191	0.108	7.07e-62	EC_0	Jun
Id3	1.2e-108	0.385927	0.298	0.169	4.02e-104	EC_0	Id3
Pxdn	3.11e-117	0.379617	0.315	0.179	1.04e-112	EC_0	Pxdn
Sdcbp	2.24e-72	0.275536	0.204	0.116	7.48e-68	EC_0	Sdcbp
Ly6a	6.63e-95	0.385166	0.262	0.149	2.22e-90	EC_0	Ly6a
Arl5b	4.19e-81	0.331672	0.225	0.128	1.4e-76	EC_0	Arl5b
Insyn2a	1.12e-46	0.290931	0.13	0.074	3.76e-42	EC_0	Insyn2a
Esam	2e-168	0.39556	0.46	0.262	6.69e-164	EC_0	Esam
Fkbp1a	5.34e-90	0.294555	0.258	0.147	1.79e-85	EC_0	Fkbp1a
Cd93	2.61e-185	0.484642	0.45	0.257	8.73e-181	EC_0	Cd93
Mfhas1	3.98e-111	0.336435	0.322	0.184	1.33e-106	EC_0	Mfhas1
Ablim3	0	0.675741	0.745	0.426	0	EC_0	Ablim3
Prkd1	1.62e-235	0.598491	0.531	0.304	5.42e-231	EC_0	Prkd1
Myo10	0	0.550356	0.772	0.443	0	EC_0	Myo10
Agmo	1.09e-98	0.453638	0.268	0.154	3.65e-94	EC_0	Agmo
Sppl2a	3.68e-87	0.292036	0.254	0.146	1.23e-82	EC_0	Sppl2a
Gm15614	3.39e-82	0.414248	0.226	0.13	1.13e-77	EC_0	Gm15614
Akap12	5.45e-93	0.443204	0.267	0.154	1.82e-88	EC_0	Akap12
Coro2b	5.44e-94	0.257438	0.293	0.169	1.82e-89	EC_0	Coro2b
Cdc42ep3	7.73e-77	0.258504	0.234	0.135	2.58e-72	EC_0	Cdc42ep3
Col4a1	0	0.830003	0.74	0.427	0	EC_0	Col4a1
Clic5	6.04e-182	0.493418	0.459	0.265	2.02e-177	EC_0	Clic5
Ramp2	1e-68	0.269802	0.206	0.119	3.35e-64	EC_0	Ramp2
St5	4.14e-151	0.40669	0.42	0.243	1.39e-146	EC_0	St5
Marcks	1.61e-66	0.270806	0.202	0.117	5.37e-62	EC_0	Marcks
Rapgef4	9.7e-186	0.409351	0.53	0.307	3.24e-181	EC_0	Rapgef4
Spred1	5.44e-135	0.441041	0.359	0.208	1.82e-130	EC_0	Spred1
Map4k5	8.06e-134	0.409071	0.364	0.211	2.69e-129	EC_0	Map4k5
Bcl2	1.05e-127	0.467696	0.345	0.2	3.52e-123	EC_0	Bcl2
Colgalt2	1.64e-113	0.342011	0.338	0.196	5.47e-109	EC_0	Colgalt2
Kdr	0	0.685241	0.666	0.387	0	EC_0	Kdr
Disc1	4.58e-69	0.254923	0.215	0.125	1.53e-64	EC_0	Disc1
Tmem140	4.97e-74	0.255637	0.227	0.132	1.66e-69	EC_0	Tmem140
Tnfsf10	6.28e-70	0.289644	0.208	0.121	2.1e-65	EC_0	Tnfsf10
Pparg	1.88e-208	0.524575	0.537	0.313	6.27e-204	EC_0	Pparg
Ric1	1e-138	0.376325	0.398	0.232	3.36e-134	EC_0	Ric1
Arhgap18	0	0.752452	0.717	0.418	0	EC_0	Arhgap18
Nck2	1.52e-138	0.377589	0.399	0.233	5.08e-134	EC_0	Nck2
Dlc1	2.06e-264	0.616483	0.577	0.337	6.9e-260	EC_0	Dlc1
Egr1	2.14e-124	0.430516	0.368	0.215	7.17e-120	EC_0	Egr1
Cadm1	8.99e-46	0.252175	0.142	0.083	3.01e-41	EC_0	Cadm1
Zfp36l1	8.88e-69	0.299774	0.21	0.123	2.97e-64	EC_0	Zfp36l1
Fzd4	7.32e-81	0.262007	0.259	0.152	2.45e-76	EC_0	Fzd4
Adamts9	0	0.67782	0.74	0.435	0	EC_0	Adamts9
Nav3	0	0.80592	0.753	0.443	0	EC_0	Nav3
Gm26883	5.92e-35	0.256085	0.11	0.065	1.98e-30	EC_0	Gm26883
5330438D12Rik	1.26e-55	0.350843	0.169	0.1	4.21e-51	EC_0	5330438D12Rik
Myo1b	1.48e-179	0.444415	0.513	0.304	4.96e-175	EC_0	Myo1b
AU020206	2.29e-117	0.309446	0.386	0.229	7.66e-113	EC_0	AU020206
Rnf125	1.68e-56	0.251466	0.18	0.107	5.62e-52	EC_0	Rnf125
Ccdc85a	0	0.697199	0.81	0.482	0	EC_0	Ccdc85a
Uaca	3.33e-104	0.357733	0.319	0.19	1.11e-99	EC_0	Uaca
Rab31	4.64e-90	0.306522	0.287	0.171	1.55e-85	EC_0	Rab31
Lnx2	7.68e-84	0.252498	0.287	0.171	2.57e-79	EC_0	Lnx2
Ankrd28	4.28e-78	0.301803	0.264	0.158	1.43e-73	EC_0	Ankrd28
Tspan13	3.71e-191	0.426812	0.54	0.324	1.24e-186	EC_0	Tspan13
Scai	2.54e-89	0.334524	0.293	0.176	8.48e-85	EC_0	Scai
Gm48678	7.45e-61	0.384875	0.191	0.115	2.49e-56	EC_0	Gm48678
B2m	1.64e-185	0.573963	0.475	0.288	5.48e-181	EC_0	B2m
Sik1	1.13e-77	0.286327	0.272	0.165	3.77e-73	EC_0	Sik1
Slc28a2	1.33e-156	0.331517	0.562	0.342	4.45e-152	EC_0	Slc28a2
Sh3bp5	1.63e-56	0.269426	0.195	0.119	5.45e-52	EC_0	Sh3bp5
Ehd2	1.29e-95	0.309087	0.324	0.198	4.32e-91	EC_0	Ehd2
Hecw2	1.55e-180	0.44449	0.541	0.331	5.18e-176	EC_0	Hecw2
Ly6e	1.35e-138	0.46282	0.426	0.261	4.5e-134	EC_0	Ly6e
Spred2	1.45e-187	0.442227	0.561	0.345	4.84e-183	EC_0	Spred2
Adamts1	2.59e-53	0.252541	0.193	0.119	8.65e-49	EC_0	Adamts1
Ppp1r2	2.45e-157	0.414249	0.498	0.308	8.19e-153	EC_0	Ppp1r2
Cbfb	2.13e-65	0.272744	0.244	0.151	7.11e-61	EC_0	Cbfb
Gopc	1.05e-73	0.271265	0.281	0.174	3.52e-69	EC_0	Gopc
Myo18a	9.49e-113	0.267693	0.434	0.269	3.17e-108	EC_0	Myo18a
Klf6	1.87e-76	0.256549	0.287	0.178	6.25e-72	EC_0	Klf6
Rps29	8.3e-63	0.276093	0.245	0.152	2.77e-58	EC_0	Rps29
Ednrb	9.12e-69	0.293198	0.256	0.159	3.05e-64	EC_0	Ednrb
Eepd1	9.95e-165	0.374216	0.566	0.352	3.33e-160	EC_0	Eepd1
Epb41	7.91e-151	0.431924	0.488	0.304	2.64e-146	EC_0	Epb41
Actr3	3.86e-81	0.278638	0.314	0.196	1.29e-76	EC_0	Actr3
Nid1	1.31e-75	0.274029	0.277	0.173	4.39e-71	EC_0	Nid1
Mcf2l	1.37e-206	0.432182	0.629	0.393	4.59e-202	EC_0	Mcf2l
Srgap1	7.01e-84	0.276284	0.329	0.206	2.34e-79	EC_0	Srgap1
Lmo7	1.17e-91	0.316323	0.355	0.223	3.92e-87	EC_0	Lmo7
mt-Nd2	5.04e-55	0.377481	0.208	0.131	1.68e-50	EC_0	mt-Nd2
Adarb1	6.27e-115	0.279574	0.465	0.293	2.1e-110	EC_0	Adarb1
Hspg2	6.13e-305	0.538119	0.733	0.462	2.05e-300	EC_0	Hspg2
Lamc1	7.44e-103	0.366246	0.376	0.237	2.49e-98	EC_0	Lamc1
Ttc7b	2.44e-159	0.386968	0.545	0.344	8.14e-155	EC_0	Ttc7b
Galnt1	3.05e-79	0.276438	0.317	0.201	1.02e-74	EC_0	Galnt1
Ndel1	1.8e-75	0.258213	0.312	0.198	6.01e-71	EC_0	Ndel1
Lcorl	2.67e-83	0.322601	0.329	0.209	8.92e-79	EC_0	Lcorl
Cblb	2.25e-74	0.262853	0.308	0.196	7.51e-70	EC_0	Cblb
Txnip	7.47e-47	0.25584	0.187	0.119	2.5e-42	EC_0	Txnip
Nxpe2	8e-91	0.353018	0.35	0.223	2.67e-86	EC_0	Nxpe2
Trpm3	2.84e-144	0.417669	0.524	0.335	9.49e-140	EC_0	Trpm3
Cdh5	3.4e-254	0.583649	0.635	0.406	1.14e-249	EC_0	Cdh5
Ywhaq	1.82e-69	0.256002	0.292	0.187	6.1e-65	EC_0	Ywhaq
Dgkh	2.17e-240	0.483017	0.694	0.445	7.27e-236	EC_0	Dgkh
Smad1	3.77e-112	0.355126	0.435	0.279	1.26e-107	EC_0	Smad1
Fam117b	2.76e-103	0.345252	0.41	0.263	9.24e-99	EC_0	Fam117b
Jcad	1.73e-80	0.294129	0.324	0.208	5.78e-76	EC_0	Jcad
Chd7	4.79e-71	0.256498	0.308	0.198	1.6e-66	EC_0	Chd7
Mndal	2.61e-114	0.324698	0.493	0.317	8.73e-110	EC_0	Mndal
Sh3glb1	8.43e-78	0.252227	0.334	0.215	2.82e-73	EC_0	Sh3glb1
Acvr2a	4.95e-79	0.264798	0.34	0.219	1.65e-74	EC_0	Acvr2a
Rasgrp3	2.21e-242	0.473424	0.698	0.45	7.38e-238	EC_0	Rasgrp3
Plxnd1	1.68e-108	0.295457	0.462	0.298	5.61e-104	EC_0	Plxnd1
Zfp366	2.1e-127	0.36358	0.51	0.329	7.01e-123	EC_0	Zfp366
Slfn5	1.17e-161	0.406848	0.559	0.361	3.91e-157	EC_0	Slfn5
Ebf3	2.17e-100	0.264181	0.467	0.302	7.26e-96	EC_0	Ebf3
Rgl1	2.16e-100	0.283189	0.428	0.277	7.21e-96	EC_0	Rgl1
H2-D1	3.87e-98	0.323056	0.415	0.269	1.29e-93	EC_0	H2-D1
Pls3	1.32e-98	0.281495	0.418	0.271	4.42e-94	EC_0	Pls3
Cnot6l	1.42e-89	0.282577	0.387	0.251	4.75e-85	EC_0	Cnot6l
Gm15581	8.02e-45	0.257997	0.205	0.133	2.68e-40	EC_0	Gm15581
Ube2d3	4.56e-84	0.269697	0.371	0.241	1.52e-79	EC_0	Ube2d3
Itga1	1.37e-288	0.577826	0.729	0.474	4.57e-284	EC_0	Itga1
Meox2	5.67e-92	0.299567	0.41	0.267	1.9e-87	EC_0	Meox2
Mbd2	9.27e-85	0.289316	0.368	0.24	3.1e-80	EC_0	Mbd2
Itga6	0	0.587647	0.778	0.508	0	EC_0	Itga6
Rcsd1	2.24e-106	0.349265	0.44	0.288	7.49e-102	EC_0	Rcsd1
Rap1a	7.2e-128	0.376216	0.507	0.332	2.41e-123	EC_0	Rap1a
Ankrd44	1.18e-134	0.335245	0.545	0.357	3.95e-130	EC_0	Ankrd44
Rnf220	7.88e-58	0.288489	0.268	0.176	2.63e-53	EC_0	Rnf220
Clec1a	2.15e-64	0.269291	0.301	0.198	7.18e-60	EC_0	Clec1a
S1pr1	1.97e-83	0.282723	0.389	0.256	6.6e-79	EC_0	S1pr1
Fermt2	4.04e-118	0.317594	0.514	0.341	1.35e-113	EC_0	Fermt2
Pard3bos1	1.12e-23	0.253872	0.11	0.073	3.75e-19	EC_0	Pard3bos1
Parp14	4.11e-64	0.297632	0.301	0.2	1.37e-59	EC_0	Parp14
Pik3c2a	1.05e-87	0.273872	0.412	0.274	3.51e-83	EC_0	Pik3c2a
4930402H24Rik	1.32e-120	0.369428	0.501	0.334	4.43e-116	EC_0	4930402H24Rik
Ifi203	6.56e-59	0.277509	0.324	0.216	2.19e-54	EC_0	Ifi203
Xdh	8.43e-156	0.401754	0.607	0.406	2.82e-151	EC_0	Xdh
Rnf213	2.16e-76	0.378515	0.351	0.235	7.21e-72	EC_0	Rnf213
Xiap	2.31e-123	0.352177	0.532	0.358	7.73e-119	EC_0	Xiap
Cyth1	4.33e-118	0.28217	0.588	0.397	1.45e-113	EC_0	Cyth1
Nxpe4	2.03e-142	0.356012	0.613	0.414	6.78e-138	EC_0	Nxpe4
Bach2	7.85e-74	0.288874	0.376	0.254	2.62e-69	EC_0	Bach2
Znrf1	5.66e-112	0.328394	0.531	0.359	1.89e-107	EC_0	Znrf1
Nptn	5.86e-83	0.26386	0.423	0.286	1.96e-78	EC_0	Nptn
Filip1	9.59e-102	0.318424	0.506	0.343	3.2e-97	EC_0	Filip1
Auts2	6.08e-167	0.465767	0.615	0.418	2.03e-162	EC_0	Auts2
Myh9	4.61e-107	0.312435	0.52	0.354	1.54e-102	EC_0	Myh9
mt-Nd4	1.02e-34	0.261455	0.192	0.131	3.4e-30	EC_0	mt-Nd4
Sorbs1	5.05e-132	0.350639	0.606	0.415	1.69e-127	EC_0	Sorbs1
Ppm1h	1.03e-95	0.288711	0.49	0.336	3.44e-91	EC_0	Ppm1h
Cd200	1.26e-82	0.311204	0.414	0.284	4.22e-78	EC_0	Cd200
Myo1e	3.95e-108	0.308102	0.575	0.395	1.32e-103	EC_0	Myo1e
Oxr1	1.72e-306	0.535899	0.805	0.554	5.74e-302	EC_0	Oxr1
Dach1	0	0.677886	0.858	0.591	0	EC_0	Dach1
Map4k3	1.25e-181	0.383691	0.693	0.478	4.19e-177	EC_0	Map4k3
Nav1	1.53e-171	0.38634	0.692	0.478	5.11e-167	EC_0	Nav1
Plpp3	8.63e-167	0.435585	0.647	0.447	2.88e-162	EC_0	Plpp3
Mef2a	1.12e-165	0.420386	0.655	0.453	3.74e-161	EC_0	Mef2a
Aqp1	1.93e-119	0.44214	0.517	0.358	6.45e-115	EC_0	Aqp1
Itgb1	1.1e-103	0.350657	0.508	0.353	3.68e-99	EC_0	Itgb1
Ptbp3	7.14e-87	0.272898	0.486	0.338	2.38e-82	EC_0	Ptbp3
Yes1	1.84e-91	0.274238	0.516	0.359	6.16e-87	EC_0	Yes1
Vav3	1.01e-141	0.356742	0.656	0.457	3.38e-137	EC_0	Vav3
Qk	4.27e-249	0.523375	0.742	0.517	1.43e-244	EC_0	Qk
Gnas	8.7e-94	0.322587	0.469	0.327	2.91e-89	EC_0	Gnas
Nrp2	2.02e-168	0.527937	0.646	0.451	6.74e-164	EC_0	Nrp2
Kitl	2.49e-299	0.544032	0.823	0.577	8.31e-295	EC_0	Kitl
Trim24	1.87e-72	0.2703	0.429	0.301	6.25e-68	EC_0	Trim24
Ets1	3.42e-220	0.437219	0.747	0.526	1.14e-215	EC_0	Ets1
Mgll	1.65e-215	0.457362	0.745	0.525	5.51e-211	EC_0	Mgll
Lims2	1.15e-141	0.322117	0.718	0.506	3.83e-137	EC_0	Lims2
Palmd	7.79e-80	0.255655	0.514	0.363	2.6e-75	EC_0	Palmd
Fabp4	0	1.07471	0.833	0.589	0	EC_0	Fabp4
Lrrc8c	1.07e-133	0.350869	0.656	0.465	3.57e-129	EC_0	Lrrc8c
Dysf	6.57e-119	0.293682	0.672	0.48	2.2e-114	EC_0	Dysf
Nbeal1	2.7e-126	0.360769	0.635	0.454	9.02e-122	EC_0	Nbeal1
Arhgap29	8.28e-111	0.295549	0.642	0.461	2.77e-106	EC_0	Arhgap29
Phlpp1	3.14e-115	0.281721	0.678	0.487	1.05e-110	EC_0	Phlpp1
Snrk	2.02e-167	0.367612	0.735	0.528	6.74e-163	EC_0	Snrk
Cd36	0	0.645334	0.868	0.625	0	EC_0	Cd36
Plxna2	8.01e-159	0.389355	0.709	0.513	2.68e-154	EC_0	Plxna2
Zbtb16	5.16e-36	0.250724	0.247	0.179	1.72e-31	EC_0	Zbtb16
Herc6	1.5e-37	0.26741	0.266	0.193	5e-33	EC_0	Herc6
Nedd9	1.85e-92	0.267614	0.608	0.442	6.18e-88	EC_0	Nedd9
Prickle2	8.39e-57	0.277868	0.392	0.285	2.8e-52	EC_0	Prickle2
Cep85l	3.71e-96	0.318998	0.598	0.435	1.24e-91	EC_0	Cep85l
Cav1	2.37e-161	0.436279	0.672	0.489	7.91e-157	EC_0	Cav1
Ptpn12	4.65e-73	0.256404	0.523	0.381	1.55e-68	EC_0	Ptpn12
Afdn	5.1e-192	0.398916	0.77	0.562	1.7e-187	EC_0	Afdn
Wasf2	1.41e-102	0.291947	0.637	0.466	4.71e-98	EC_0	Wasf2
mt-Atp6	1.06e-29	0.268703	0.236	0.173	3.55e-25	EC_0	mt-Atp6
Lama4	1.09e-100	0.294281	0.643	0.472	3.64e-96	EC_0	Lama4
Ccny	1.13e-85	0.258251	0.611	0.449	3.79e-81	EC_0	Ccny
Picalm	5.22e-150	0.365203	0.74	0.544	1.74e-145	EC_0	Picalm
Sbf2	1.46e-105	0.310086	0.659	0.487	4.88e-101	EC_0	Sbf2
Mcc	4e-157	0.374553	0.751	0.555	1.34e-152	EC_0	Mcc
Psd3	5.26e-158	0.371809	0.726	0.537	1.76e-153	EC_0	Psd3
Pdgfd	3.98e-161	0.317926	0.79	0.586	1.33e-156	EC_0	Pdgfd
Rapgef1	2.23e-133	0.281715	0.785	0.583	7.47e-129	EC_0	Rapgef1
Adgrl2	8.36e-146	0.407011	0.73	0.544	2.79e-141	EC_0	Adgrl2
Arhgef12	5.19e-131	0.336588	0.711	0.53	1.73e-126	EC_0	Arhgef12
Prkce	1.54e-99	0.304565	0.657	0.493	5.14e-95	EC_0	Prkce
Cdk17	3.86e-77	0.250152	0.625	0.469	1.29e-72	EC_0	Cdk17
Nrp1	1.16e-258	0.448595	0.863	0.648	3.88e-254	EC_0	Nrp1
Mef2c	1.05e-138	0.3851	0.725	0.546	3.51e-134	EC_0	Mef2c
Ralgapa1	9.04e-124	0.305267	0.731	0.555	3.02e-119	EC_0	Ralgapa1
Creb5	5.87e-24	0.262219	0.214	0.163	1.96e-19	EC_0	Creb5
Cdh13	4.79e-243	0.542222	0.825	0.634	1.6e-238	EC_0	Cdh13
Itpkb	1.65e-270	0.415359	0.913	0.705	5.52e-266	EC_0	Itpkb
Myo1d	3.57e-95	0.27205	0.729	0.563	1.19e-90	EC_0	Myo1d
2610307P16Rik	9.36e-47	0.347627	0.418	0.324	3.13e-42	EC_0	2610307P16Rik
Ptk2	2.51e-111	0.27514	0.784	0.61	8.38e-107	EC_0	Ptk2
Lrmda	2.21e-86	0.280937	0.668	0.521	7.39e-82	EC_0	Lrmda
Atxn1	2.44e-97	0.278263	0.75	0.59	8.16e-93	EC_0	Atxn1
Rapgef2	3.17e-135	0.289039	0.831	0.66	1.06e-130	EC_0	Rapgef2
Adgrl4	3.81e-134	0.26033	0.872	0.693	1.27e-129	EC_0	Adgrl4
Rps6ka2	5.08e-08	-0.630859	0.25	0.199	0.00169752	EC_0	Rps6ka2
Fbxl7	5.1e-121	0.31801	0.803	0.646	1.71e-116	EC_0	Fbxl7
Pitpnc1	2.43e-163	0.332208	0.89	0.717	8.12e-159	EC_0	Pitpnc1
Etl4	3.84e-246	0.377833	0.938	0.761	1.28e-241	EC_0	Etl4
Apbb2	1.75e-245	0.411977	0.917	0.747	5.85e-241	EC_0	Apbb2
Rasal2	6.89e-100	0.25504	0.83	0.678	2.3e-95	EC_0	Rasal2
Cyyr1	7.26e-168	0.354005	0.89	0.731	2.43e-163	EC_0	Cyyr1
Ext1	2.2e-88	0.25671	0.815	0.676	7.34e-84	EC_0	Ext1
Dock4	1.17e-110	0.302884	0.848	0.706	3.91e-106	EC_0	Dock4
Arl15	1.23e-15	-0.402729	0.722	0.603	4.1e-11	EC_0	Arl15
Ablim1	1.27e-161	0.288667	0.928	0.779	4.25e-157	EC_0	Ablim1
Plcb4	1.3e-233	0.39307	0.947	0.811	4.34e-229	EC_0	Plcb4
Plcb1	4.25e-103	0.277823	0.88	0.754	1.42e-98	EC_0	Plcb1
Sptbn1	5.35e-237	0.355304	0.959	0.849	1.79e-232	EC_0	Sptbn1
Tcf4	0	0.568501	0.978	0.877	0	EC_0	Tcf4
Mecom	2.74e-10	-0.332676	0.822	0.751	9.16e-06	EC_0	Mecom
Calcrl	0.00183478	-0.514247	0.461	0.422	1	EC_0	Calcrl
Nfia	2.25e-08	-0.273665	0.706	0.648	0.000752857	EC_0	Nfia
Ptprm	8.65e-239	0.311689	0.986	0.906	2.89e-234	EC_0	Ptprm
Heg1	3.72e-51	-0.576023	0.706	0.658	1.24e-46	EC_0	Heg1
Klf12	2.33e-07	-0.276601	0.553	0.527	0.00779398	EC_0	Klf12
Rhoj	6.17e-06	-0.294263	0.48	0.46	0.206052	EC_0	Rhoj
Tmtc1	1.23e-10	-0.42507	0.481	0.466	4.12e-06	EC_0	Tmtc1
Gmds	1.18e-05	-0.469213	0.356	0.348	0.392988	EC_0	Gmds
Foxp1	8.14e-82	-0.608828	0.661	0.648	2.72e-77	EC_0	Foxp1
Sncaip	1.04e-06	-0.44581	0.385	0.379	0.034815	EC_0	Sncaip
Rgs3	1.39e-07	-0.376482	0.321	0.322	0.00464533	EC_0	Rgs3
Ldlrad4	5.17e-10	-0.340083	0.385	0.392	1.73e-05	EC_0	Ldlrad4
mt-Co1	1.37e-12	-0.499857	0.405	0.413	4.59e-08	EC_0	mt-Co1
Ece1	9.53e-06	-0.348558	0.244	0.25	0.318569	EC_0	Ece1
Nxn	1.11e-25	-0.43254	0.488	0.501	3.71e-21	EC_0	Nxn
Pam	6.09e-10	-0.426733	0.312	0.321	2.03e-05	EC_0	Pam
Zfp521	4.06e-16	-0.562369	0.345	0.356	1.36e-11	EC_0	Zfp521
Gm42418	0	-0.980815	0.878	0.911	0	EC_0	Gm42418
Dock6	8.19e-14	-0.350947	0.343	0.358	2.74e-09	EC_0	Dock6
Ogt	2.47e-08	-0.336219	0.268	0.28	0.000826513	EC_0	Ogt
Rai14	0.000376375	-0.275198	0.187	0.196	1	EC_0	Rai14
Il31ra	5.03e-05	-0.324829	0.195	0.205	1	EC_0	Il31ra
AY036118	8.19e-233	-1.03082	0.725	0.764	2.74e-228	EC_0	AY036118
Fndc3b	1.31e-08	-0.348063	0.258	0.272	0.000438058	EC_0	Fndc3b
Tgfbr2	0.000581917	-0.312937	0.164	0.173	1	EC_0	Tgfbr2
2011-09-01	0.000107171	-0.308432	0.181	0.191	1	EC_0	45911
Cdk8	3.34e-13	-0.270188	0.434	0.458	1.12e-08	EC_0	Cdk8
Tmem164	6.04e-13	-0.579781	0.287	0.304	2.02e-08	EC_0	Tmem164
Hexb	4.61e-11	-0.358285	0.281	0.299	1.54e-06	EC_0	Hexb
Stab1	0.000679832	-0.303837	0.14	0.149	1	EC_0	Stab1
Cox7c	5.68e-05	-0.400428	0.153	0.163	1	EC_0	Cox7c
Plxna4	9.02e-29	-0.610143	0.367	0.392	3.01e-24	EC_0	Plxna4
Pbx1	1.04e-18	-0.564115	0.319	0.341	3.49e-14	EC_0	Pbx1
Aldoa	0.000434105	-0.423983	0.112	0.12	1	EC_0	Aldoa
Eogt	0.00320785	-0.301079	0.102	0.11	1	EC_0	Eogt
Unc13b	8.81e-42	-0.583347	0.39	0.421	2.95e-37	EC_0	Unc13b
Pde7b	2.77e-06	-0.675861	0.144	0.156	0.0925483	EC_0	Pde7b
Stim1	3.91e-06	-0.272094	0.181	0.197	0.130698	EC_0	Stim1
Fmo2	5.12e-07	-0.392425	0.169	0.185	0.0171133	EC_0	Fmo2
Cmss1	4.18e-40	-0.349026	0.595	0.652	1.4e-35	EC_0	Cmss1
Nr3c2	2.83e-17	-0.437971	0.295	0.325	9.47e-13	EC_0	Nr3c2
Aig1	0.000120947	-0.253042	0.118	0.131	1	EC_0	Aig1
Lima1	2.9e-19	-0.451508	0.267	0.297	9.69e-15	EC_0	Lima1
Mill2	1.41e-10	-0.301192	0.2	0.225	4.72e-06	EC_0	Mill2
Atp5b	5.52e-11	-0.548542	0.157	0.177	1.84e-06	EC_0	Atp5b
Atp2b4	8.75e-12	-0.362744	0.196	0.221	2.92e-07	EC_0	Atp2b4
Atp1b3	4.86e-06	-0.295388	0.117	0.132	0.162342	EC_0	Atp1b3
Atp13a3	2.67e-06	-0.416723	0.123	0.139	0.0893079	EC_0	Atp13a3
Camk1d	8.89e-105	-0.575597	0.597	0.677	2.97e-100	EC_0	Camk1d
Nfix	3e-07	-0.269484	0.136	0.155	0.0100223	EC_0	Nfix
St3gal4	3.56e-16	-0.442208	0.214	0.244	1.19e-11	EC_0	St3gal4
Fbn1	3.14e-32	-0.517287	0.293	0.335	1.05e-27	EC_0	Fbn1
Stt3b	6.9e-06	-0.288748	0.111	0.127	0.230581	EC_0	Stt3b
Samd5	2.3e-09	-0.372823	0.139	0.16	7.68e-05	EC_0	Samd5
Atp5a1	2.16e-07	-0.450757	0.104	0.12	0.00720682	EC_0	Atp5a1
Lars2	8e-80	-0.645299	0.44	0.509	2.68e-75	EC_0	Lars2
Hmcn1	1.21e-65	-1.38544	0.326	0.38	4.03e-61	EC_0	Hmcn1
Acer2	1.17e-20	-0.650926	0.188	0.222	3.9e-16	EC_0	Acer2
Acer3	4.69e-08	-0.260972	0.108	0.128	0.00156714	EC_0	Acer3
Cdc14a	9.56e-12	-0.363181	0.139	0.165	3.2e-07	EC_0	Cdc14a
Lifr	1.36e-13	-0.38941	0.148	0.176	4.56e-09	EC_0	Lifr
Dennd4a	2.8e-09	-0.392304	0.111	0.132	9.37e-05	EC_0	Dennd4a
Fchsd2	2.04e-19	-0.496455	0.184	0.219	6.82e-15	EC_0	Fchsd2
Gcnt2	1.19e-13	-0.372398	0.156	0.186	3.97e-09	EC_0	Gcnt2
Nhsl2	8.83e-17	-0.453865	0.153	0.185	2.95e-12	EC_0	Nhsl2
Bcr	7.54e-12	-0.326512	0.124	0.15	2.52e-07	EC_0	Bcr
Tpm1	3.91e-34	-0.705608	0.216	0.262	1.31e-29	EC_0	Tpm1
Rps6ka5	8.93e-09	-0.269365	0.098	0.119	0.000298369	EC_0	Rps6ka5
Cgnl1	1.65e-30	-1.10745	0.177	0.215	5.5e-26	EC_0	Cgnl1
Rasa4	2.77e-13	-0.58367	0.111	0.135	9.25e-09	EC_0	Rasa4
Slco3a1	1.6e-21	-0.498891	0.173	0.211	5.36e-17	EC_0	Slco3a1
Wbp1l	4.92e-14	-0.331477	0.132	0.161	1.64e-09	EC_0	Wbp1l
Tbc1d8	7.98e-09	-0.259376	0.09	0.11	0.000266751	EC_0	Tbc1d8
St6gal1	1.18e-14	-0.396429	0.132	0.162	3.93e-10	EC_0	St6gal1
Fam189a2	3.01e-09	-0.255843	0.087	0.108	0.000100452	EC_0	Fam189a2
Cox6b1	1.99e-12	-0.481182	0.091	0.113	6.66e-08	EC_0	Cox6b1
Palm	5.67e-31	-0.492905	0.202	0.251	1.89e-26	EC_0	Palm
Upp2	6.33e-10	-0.287695	0.094	0.117	2.11e-05	EC_0	Upp2
Il1r1	6.67e-21	-0.477882	0.146	0.183	2.23e-16	EC_0	Il1r1
Azin1	3.55e-13	-0.480612	0.097	0.123	1.19e-08	EC_0	Azin1
Atp5e	8.09e-15	-0.57781	0.096	0.122	2.7e-10	EC_0	Atp5e
Parp8	9.91e-22	-0.52385	0.128	0.165	3.31e-17	EC_0	Parp8
Atp5j2	8.54e-21	-0.578189	0.111	0.144	2.86e-16	EC_0	Atp5j2
Mical2	1.61e-22	-0.425446	0.133	0.173	5.39e-18	EC_0	Mical2
Atp5h	1.28e-20	-0.565815	0.109	0.142	4.29e-16	EC_0	Atp5h
9530026P05Rik	2.19e-83	-0.598668	0.326	0.426	7.31e-79	EC_0	9530026P05Rik
Zfp423	1.03e-32	-0.459892	0.166	0.218	3.44e-28	EC_0	Zfp423
Msrb3	5.52e-40	-0.552945	0.184	0.242	1.84e-35	EC_0	Msrb3
Apba1	4.29e-31	-0.678172	0.143	0.191	1.43e-26	EC_0	Apba1
Adamts10	5.59e-22	-0.378325	0.116	0.155	1.87e-17	EC_0	Adamts10
Bsg	7.03e-21	-0.481998	0.097	0.13	2.35e-16	EC_0	Bsg
Ankrd33b	6.17e-19	-0.355368	0.095	0.128	2.06e-14	EC_0	Ankrd33b
Fbln2	7.64e-16	-0.355494	0.077	0.104	2.55e-11	EC_0	Fbln2
Nt5c2	4.2e-15	-0.284575	0.078	0.106	1.4e-10	EC_0	Nt5c2
Ralgapa2	7.9e-61	-0.899458	0.192	0.261	2.64e-56	EC_0	Ralgapa2
Mb	1.41e-66	-1.0002	0.195	0.266	4.73e-62	EC_0	Mb
Tspan5	1.33e-40	-0.534265	0.16	0.22	4.44e-36	EC_0	Tspan5
Il6st	5.68e-39	-0.61684	0.138	0.191	1.9e-34	EC_0	Il6st
Cd9	2.02e-30	-0.436344	0.12	0.167	6.74e-26	EC_0	Cd9
Slc25a4	1.05e-124	-1.02477	0.267	0.372	3.5e-120	EC_0	Slc25a4
Ndufb7	2.33e-31	-0.662831	0.109	0.152	7.77e-27	EC_0	Ndufb7
Atp5g1	1.32e-18	-0.470376	0.075	0.105	4.41e-14	EC_0	Atp5g1
Smad6	1.26e-29	-0.656349	0.104	0.147	4.2e-25	EC_0	Smad6
D5Ertd615e	2.17e-24	-0.700203	0.087	0.123	7.26e-20	EC_0	D5Ertd615e
Actc1	2.07e-68	-0.853267	0.183	0.259	6.91e-64	EC_0	Actc1
Cadps2	2.51e-47	-0.572847	0.155	0.22	8.4e-43	EC_0	Cadps2
Atp5g3	2e-44	-0.81526	0.123	0.176	6.68e-40	EC_0	Atp5g3
Ptpn14	3.58e-91	-0.865516	0.203	0.291	1.2e-86	EC_0	Ptpn14
Atp5d	4.27e-25	-0.54692	0.077	0.112	1.43e-20	EC_0	Atp5d
Lyst	6.82e-34	-0.436829	0.109	0.159	2.28e-29	EC_0	Lyst
Insr	2.36e-38	-0.649463	0.115	0.168	7.88e-34	EC_0	Insr
Actn1	9.65e-29	-0.388855	0.093	0.136	3.23e-24	EC_0	Actn1
Jag1	4.23e-26	-0.459405	0.07	0.106	1.41e-21	EC_0	Jag1
Ephx1	5.64e-32	-0.365642	0.081	0.125	1.88e-27	EC_0	Ephx1
Tln2	1.73e-40	-0.453291	0.101	0.156	5.78e-36	EC_0	Tln2
Gm10800	1.45e-40	-0.834715	0.093	0.144	4.86e-36	EC_0	Gm10800
Flrt2	2.69e-43	-0.814701	0.1	0.156	9e-39	EC_0	Flrt2
Abca1	3.59e-30	-0.43649	0.072	0.113	1.2e-25	EC_0	Abca1
Mpp7	4.51e-32	-0.531659	0.073	0.115	1.51e-27	EC_0	Mpp7
Atp5k	1.27e-53	-0.773883	0.106	0.167	4.26e-49	EC_0	Atp5k
Itsn1	5.27e-28	-0.321083	0.064	0.102	1.76e-23	EC_0	Itsn1
Eps8	2.97e-56	-0.741733	0.097	0.159	9.92e-52	EC_0	Eps8
March3	1.62e-62	-0.804228	0.11	0.181	5.4e-58	EC_0	March3
Wls	1.23e-32	-0.380081	0.063	0.104	4.11e-28	EC_0	Wls
Uqcrq	5.64e-54	-0.738348	0.088	0.147	1.89e-49	EC_0	Uqcrq
Uqcr11	3.33e-70	-0.898935	0.104	0.174	1.11e-65	EC_0	Uqcr11
Myl2	3.43e-124	-1.21544	0.159	0.267	1.15e-119	EC_0	Myl2
Myl3	1.49e-176	-1.26689	0.195	0.331	4.99e-172	EC_0	Myl3
Prkag2	1.28e-59	-0.673402	0.093	0.158	4.27e-55	EC_0	Prkag2
Cemip2	1.06e-97	-1.15052	0.125	0.215	3.54e-93	EC_0	Cemip2
Thsd7a	9.99e-166	-1.2125	0.177	0.31	3.34e-161	EC_0	Thsd7a
Ndufa13	9.62e-45	-0.687128	0.063	0.111	3.21e-40	EC_0	Ndufa13
Arrb1	6.96e-39	-0.357432	0.057	0.101	2.33e-34	EC_0	Arrb1
Ckm	1.08e-82	-0.915874	0.095	0.172	3.6e-78	EC_0	Ckm
Des	4.24e-61	-0.754663	0.074	0.134	1.42e-56	EC_0	Des
Fabp3	1.02e-83	-0.950057	0.092	0.17	3.42e-79	EC_0	Fabp3
Tnnc1	3.54e-112	-0.998442	0.114	0.212	1.18e-107	EC_0	Tnnc1
Cox6a2	1.36e-153	-1.10159	0.137	0.26	4.55e-149	EC_0	Cox6a2
Entpd1	3.26e-221	-1.24707	0.15	0.305	1.09e-216	EC_0	Entpd1
Tnni3	9.24e-212	-1.37452	0.145	0.295	3.09e-207	EC_0	Tnni3
Itga9	7.92e-132	-0.944393	0.099	0.206	2.65e-127	EC_0	Itga9
Pgm5	3.17e-118	-1.03154	0.09	0.188	1.06e-113	EC_0	Pgm5
Dock7	2.82e-73	-0.46386	0.049	0.113	9.44e-69	EC_0	Dock7
Pld1	1.15e-84	-0.60317	0.051	0.12	3.84e-80	EC_0	Pld1
Vegfc	4.38e-288	-1.62391	0.132	0.314	1.46e-283	EC_0	Vegfc
Tbl1xr1	8.88e-79	-0.502025	0.047	0.112	2.97e-74	EC_0	Tbl1xr1
Pard3	3.39e-158	-0.920839	0.08	0.196	1.13e-153	EC_0	Pard3
Cpq	2.2e-83	-0.599941	0.044	0.11	7.35e-79	EC_0	Cpq
Bace2	4.41e-80	-0.724245	0.039	0.1	1.47e-75	EC_0	Bace2
Setbp1	1.96e-243	-1.4551	0.089	0.242	6.53e-239	EC_0	Setbp1
Rab27a	5.33e-95	-0.565907	0.037	0.106	1.78e-90	EC_0	Rab27a
Col8a1	8.05e-122	-1.0803	0.036	0.115	2.69e-117	EC_0	Col8a1
Kirrel3	6.78e-200	-1.96748	0.053	0.174	2.27e-195	EC_0	Kirrel3
Nuak1	1.52e-151	-0.931114	0.04	0.134	5.07e-147	EC_0	Nuak1
Kcnc2	8.09e-117	-1.30166	0.031	0.104	2.7e-112	EC_0	Kcnc2
Myh6	3.53e-219	-1.89799	0.054	0.182	1.18e-214	EC_0	Myh6
Pcsk5	1.92e-120	-1.11325	0.032	0.109	6.41e-116	EC_0	Pcsk5
Nr2f2	1.08e-165	-0.821604	0.036	0.134	3.62e-161	EC_0	Nr2f2
Vcam1	3.24e-130	-0.896992	0.028	0.107	1.08e-125	EC_0	Vcam1
Zbtb7c	2.73e-154	-0.834961	0.023	0.108	9.11e-150	EC_0	Zbtb7c
Cpe	2.02e-147	-0.923486	0.021	0.102	6.76e-143	EC_0	Cpe
Zfpm2	2.93e-281	-1.60865	0.031	0.17	9.8e-277	EC_0	Zfpm2
Ntn1	1.48e-241	-1.31378	0.026	0.146	4.96e-237	EC_0	Ntn1
Eln	0	-1.85486	0.036	0.215	0	EC_0	Eln
Myrip	6.44e-231	-0.967313	0.022	0.136	2.15e-226	EC_0	Myrip
Mgp	2.33e-193	-1.14343	0.016	0.108	7.8e-189	EC_0	Mgp
Meis2	3.7e-301	-1.69376	0.024	0.163	1.24e-296	EC_0	Meis2
Sorbs2	3.18e-187	-1.03851	0.013	0.101	1.06e-182	EC_0	Sorbs2
Chrm3	1.23e-299	-2.33681	0.013	0.141	4.11e-295	EC_0	Chrm3
Rbms3	0	-1.58511	0.014	0.178	0	EC_0	Rbms3
Vwf	0	-1.89425	0.012	0.182	0	EC_0	Vwf
Wdr17	1.02e-243	-1.47023	0.007	0.109	3.4e-239	EC_0	Wdr17
Sulf1	7.84e-298	-1.5424	0.008	0.132	2.62e-293	EC_0	Sulf1
Col5a2	0	-1.43613	0.008	0.143	0	EC_0	Col5a2
Cp	1.49e-277	-1.37115	0.005	0.116	4.99e-273	EC_0	Cp
Prkg1	0	-3.17315	0.005	0.184	0	EC_0	Prkg1
Thsd4	6.3e-282	-1.36394	0.001	0.108	2.1e-277	EC_0	Thsd4
Cfh	2.02e-296	-2.26946	0.001	0.114	6.77e-292	EC_0	Cfh
Mir99ahg	0	-1.91698	0.001	0.118	0	EC_0	Mir99ahg
Tmem108	5.28e-272	-2.57954	0	0.104	1.76e-267	EC_0	Tmem108
Myh6.1	0	2.59123	0.312	0.05	0	EC_1	Myh6
Myl2.1	0	1.89954	0.414	0.142	0	EC_1	Myl2
Tnni3.1	0	1.84364	0.431	0.148	0	EC_1	Tnni3
Myl3.1	0	1.74667	0.464	0.194	0	EC_1	Myl3
Tnnc1.1	0	1.47372	0.302	0.116	0	EC_1	Tnnc1
Cox6a2.1	0	1.46526	0.356	0.145	0	EC_1	Cox6a2
Slc25a4.1	0	1.43556	0.474	0.266	0	EC_1	Slc25a4
AY036118.1	0	1.38042	0.853	0.705	0	EC_1	AY036118
Gm42418.1	0	1.23799	0.97	0.867	0	EC_1	Gm42418
Malat1	0	-0.653023	0.875	0.979	0	EC_1	Malat1
Mb.1	1.32e-283	1.54234	0.366	0.183	4.41e-279	EC_1	Mb
Ralgapa2.1	5.29e-268	-1.19457	0.073	0.289	1.77e-263	EC_1	Ralgapa2
Vegfc.1	3.56e-261	-1.64137	0.081	0.288	1.19e-256	EC_1	Vegfc
Camk1d.1	6.68e-258	0.895864	0.742	0.601	2.23e-253	EC_1	Camk1d
Setbp1.1	1.31e-254	-1.49922	0.038	0.223	4.37e-250	EC_1	Setbp1
Fabp3.1	4.06e-254	1.39409	0.246	0.091	1.36e-249	EC_1	Fabp3
Ckm.1	9.33e-246	1.35059	0.247	0.094	3.12e-241	EC_1	Ckm
Prkg1.1	7.26e-227	-2.84204	0.002	0.14	2.43e-222	EC_1	Prkg1
Eln.1	1.84e-222	-1.55944	0.021	0.176	6.15e-218	EC_1	Eln
Entpd1.1	4.21e-211	-1.0473	0.096	0.287	1.41e-206	EC_1	Entpd1
Rbms3.1	1.08e-208	-1.3723	0.006	0.139	3.63e-204	EC_1	Rbms3
Foxp1.1	4.27e-206	-0.623161	0.468	0.725	1.43e-201	EC_1	Foxp1
Vwf.1	1.43e-202	-1.55164	0.009	0.14	4.76e-198	EC_1	Vwf
Uqcr11.1	8.5e-202	1.28507	0.241	0.104	2.84e-197	EC_1	Uqcr11
Zbtb20	7.19e-191	-0.402729	0.733	0.916	2.4e-186	EC_1	Zbtb20
Ghr	3.17e-187	-0.771651	0.105	0.294	1.06e-182	EC_1	Ghr
Actc1.1	1.8e-184	1.25736	0.328	0.184	6.02e-180	EC_1	Actc1
Meis2.1	8.44e-184	-1.49908	0.01	0.133	2.82e-179	EC_1	Meis2
Pard3.1	4.54e-183	-0.902936	0.037	0.183	1.52e-178	EC_1	Pard3
Plxna4.1	2.07e-180	-0.70196	0.221	0.442	6.92e-176	EC_1	Plxna4
Ptpn14.1	9.6e-180	-0.780247	0.116	0.302	3.21e-175	EC_1	Ptpn14
Pbx1.1	1.69e-179	-0.769618	0.18	0.388	5.63e-175	EC_1	Pbx1
Thsd7a.1	4.55e-178	-1.06631	0.12	0.298	1.52e-173	EC_1	Thsd7a
Lars2.1	2.46e-174	0.909646	0.56	0.446	8.22e-170	EC_1	Lars2
Heg1.1	7.73e-174	-0.63006	0.517	0.743	2.58e-169	EC_1	Heg1
Zfpm2.1	8.55e-174	-1.3997	0.017	0.14	2.86e-169	EC_1	Zfpm2
Mbnl1	5.28e-172	-0.488814	0.338	0.591	1.76e-167	EC_1	Mbnl1
Akap13	3.13e-170	-0.53691	0.291	0.531	1.04e-165	EC_1	Akap13
Ntn1.1	1.54e-169	-1.21673	0.009	0.122	5.15e-165	EC_1	Ntn1
Des.1	6.62e-166	1.12061	0.188	0.075	2.21e-161	EC_1	Des
Atp5k.1	6.12e-165	1.18745	0.228	0.105	2.04e-160	EC_1	Atp5k
Atp5g3.1	8.56e-165	1.21341	0.241	0.117	2.86e-160	EC_1	Atp5g3
Unc13b.1	4.56e-164	-0.60413	0.248	0.468	1.53e-159	EC_1	Unc13b
Col5a2.1	1.36e-163	-1.18856	0.004	0.11	4.55e-159	EC_1	Col5a2
Bmpr2	4.36e-163	-0.515943	0.244	0.47	1.46e-158	EC_1	Bmpr2
Itga9.1	6.13e-159	-0.897952	0.055	0.196	2.05e-154	EC_1	Itga9
Pgm5.1	3.43e-157	-0.995462	0.046	0.18	1.15e-152	EC_1	Pgm5
Fndc3b.1	9.47e-155	-0.513118	0.131	0.316	3.16e-150	EC_1	Fndc3b
Nfia.1	4.54e-154	-0.449455	0.508	0.738	1.52e-149	EC_1	Nfia
Chrm3.1	1.12e-150	-2.11168	0.009	0.11	3.73e-146	EC_1	Chrm3
Uqcrq.1	9.42e-150	1.10364	0.2	0.089	3.15e-145	EC_1	Uqcrq
Sulf1.1	5.26e-149	-1.27146	0.005	0.102	1.76e-144	EC_1	Sulf1
Pam.1	1.2e-147	-0.568539	0.178	0.37	4.01e-143	EC_1	Pam
Nr2f2.1	1.31e-145	-0.778452	0.013	0.117	4.39e-141	EC_1	Nr2f2
mt-Atp6.1	8.49e-143	-1.03264	0.094	0.243	2.84e-138	EC_1	mt-Atp6
Calcrl.1	1.09e-141	-0.69516	0.292	0.496	3.65e-137	EC_1	Calcrl
Idh2	1.92e-141	1.04048	0.146	0.053	6.42e-137	EC_1	Idh2
Tpm1.1	1.15e-139	1.12544	0.33	0.207	3.84e-135	EC_1	Tpm1
Insr.1	4.42e-138	-0.683375	0.051	0.18	1.48e-133	EC_1	Insr
Hmcn1.1	7.9e-138	-1.23714	0.226	0.405	2.64e-133	EC_1	Hmcn1
Nfat5	8.73e-138	-0.447469	0.263	0.481	2.92e-133	EC_1	Nfat5
Myrip.1	9.01e-138	-0.795681	0.012	0.11	3.01e-133	EC_1	Myrip
Il6st.1	7.21e-137	-0.632269	0.068	0.205	2.41e-132	EC_1	Il6st
Camk2d	7.9e-136	-0.455556	0.187	0.379	2.64e-131	EC_1	Camk2d
Fgfr2	1.02e-135	-0.423303	0.128	0.3	3.39e-131	EC_1	Fgfr2
Zfp521.1	1.53e-133	-0.650745	0.218	0.402	5.12e-129	EC_1	Zfp521
Vim	1.68e-132	-0.535018	0.047	0.17	5.62e-128	EC_1	Vim
Eef1a2	4.37e-132	0.833727	0.117	0.037	1.46e-127	EC_1	Eef1a2
Rdx	1.5e-131	-0.534863	0.109	0.264	5.02e-127	EC_1	Rdx
Fchsd2.1	1.55e-130	-0.59451	0.096	0.244	5.18e-126	EC_1	Fchsd2
Cgnl1.1	2.48e-129	-1.04303	0.096	0.236	8.3e-125	EC_1	Cgnl1
Msrb3.1	4.09e-128	-0.555323	0.106	0.257	1.37e-123	EC_1	Msrb3
Phactr2	2.35e-126	-0.418795	0.105	0.259	7.84e-122	EC_1	Phactr2
Gls	3.38e-126	-0.4465	0.204	0.393	1.13e-121	EC_1	Gls
Gmds.1	7.13e-126	-0.599215	0.22	0.402	2.38e-121	EC_1	Gmds
Ndufa13.1	2.06e-125	1.05104	0.154	0.064	6.89e-121	EC_1	Ndufa13
Elmo1	9.09e-125	-0.361539	0.574	0.793	3.04e-120	EC_1	Elmo1
mt-Cytb	3.17e-124	-0.731178	0.079	0.214	1.06e-119	EC_1	mt-Cytb
Rora	3.2e-124	-0.461472	0.289	0.483	1.07e-119	EC_1	Rora
Klf12.1	1.13e-123	-0.44121	0.388	0.597	3.79e-119	EC_1	Klf12
Pgam2	1.03e-122	0.935266	0.122	0.042	3.44e-118	EC_1	Pgam2
Csgalnact1	1.09e-122	-0.449823	0.285	0.487	3.65e-118	EC_1	Csgalnact1
Cd9.1	2.51e-122	-0.508611	0.056	0.179	8.37e-118	EC_1	Cd9
March3.1	2.83e-122	-0.846117	0.061	0.182	9.45e-118	EC_1	March3
Nfib	3.38e-122	-0.33523	0.6	0.808	1.13e-117	EC_1	Nfib
Sncaip.1	2.11e-121	-0.57876	0.247	0.433	7.06e-117	EC_1	Sncaip
Msi2	5.7e-121	-0.33673	0.163	0.341	1.9e-116	EC_1	Msi2
Ogt.1	1.3e-120	-0.399469	0.151	0.322	4.35e-116	EC_1	Ogt
Pde7b.1	1.22e-119	-0.854688	0.063	0.184	4.08e-115	EC_1	Pde7b
Acer2.1	1.32e-119	-0.683941	0.104	0.245	4.41e-115	EC_1	Acer2
Raph1	1.33e-119	-0.434161	0.12	0.274	4.45e-115	EC_1	Raph1
Cox7a1	3.7e-118	0.953984	0.134	0.051	1.24e-113	EC_1	Cox7a1
Tmem164.1	1.38e-117	-0.604366	0.175	0.343	4.61e-113	EC_1	Tmem164
Ube2e2	1.86e-116	-0.473337	0.188	0.357	6.22e-112	EC_1	Ube2e2
Diaph2	5.16e-116	-0.309872	0.468	0.697	1.73e-111	EC_1	Diaph2
Kansl1	3.7e-115	-0.307154	0.32	0.541	1.24e-110	EC_1	Kansl1
St3gal4.1	1.29e-114	-0.545368	0.124	0.27	4.32e-110	EC_1	St3gal4
Ece1.1	1.67e-114	-0.40051	0.135	0.291	5.58e-110	EC_1	Ece1
Atp2b4.1	1.76e-114	-0.42328	0.107	0.249	5.89e-110	EC_1	Atp2b4
Strbp	3.35e-114	-0.42625	0.125	0.277	1.12e-109	EC_1	Strbp
Tspan5.1	3.65e-114	-0.556455	0.095	0.23	1.22e-109	EC_1	Tspan5
Ddx5	3.74e-114	-0.287487	0.338	0.564	1.25e-109	EC_1	Ddx5
Mbd5	1.35e-113	-0.333278	0.236	0.432	4.53e-109	EC_1	Mbd5
Sntb2	1.38e-113	-0.394883	0.148	0.306	4.63e-109	EC_1	Sntb2
Fbn1.1	1.53e-113	-0.45048	0.191	0.363	5.12e-109	EC_1	Fbn1
Lima1.1	2.58e-113	-0.460118	0.165	0.328	8.64e-109	EC_1	Lima1
mt-Nd2.1	2.66e-113	-0.566516	0.075	0.201	8.9e-109	EC_1	mt-Nd2
Zfr	1.24e-111	-0.350074	0.151	0.313	4.14e-107	EC_1	Zfr
Zcchc7	2.16e-111	-0.326095	0.297	0.503	7.23e-107	EC_1	Zcchc7
Col8a1.1	2.85e-111	-1.05926	0.016	0.102	9.52e-107	EC_1	Col8a1
Selenop	4.19e-111	-0.538956	0.049	0.159	1.4e-106	EC_1	Selenop
Numb	4.38e-111	-0.349378	0.362	0.582	1.46e-106	EC_1	Numb
Pld1.1	4.55e-111	-0.582184	0.022	0.113	1.52e-106	EC_1	Pld1
Kirrel3.1	2.16e-110	-1.47091	0.044	0.147	7.21e-106	EC_1	Kirrel3
Nhsl2.1	3.67e-110	-0.502703	0.08	0.205	1.23e-105	EC_1	Nhsl2
Luc7l2	4.7e-110	-0.31504	0.301	0.514	1.57e-105	EC_1	Luc7l2
Magi3	6.23e-110	-0.379778	0.147	0.304	2.08e-105	EC_1	Magi3
Cobll1	1.5e-109	-0.593996	0.03	0.126	5.03e-105	EC_1	Cobll1
Cpq.1	2.62e-109	-0.620727	0.017	0.103	8.77e-105	EC_1	Cpq
Cmss1.1	6.52e-109	0.664736	0.694	0.599	2.18e-104	EC_1	Cmss1
Eps8.1	3.62e-108	-0.654152	0.052	0.161	1.21e-103	EC_1	Eps8
Parp8.1	5.28e-108	-0.595812	0.065	0.18	1.76e-103	EC_1	Parp8
Cadps2.1	6.84e-108	-0.568022	0.097	0.226	2.28e-103	EC_1	Cadps2
Flrt2.1	1e-107	-0.97417	0.053	0.16	3.34e-103	EC_1	Flrt2
Tmtc1.1	1.46e-107	-0.471283	0.332	0.527	4.87e-103	EC_1	Tmtc1
Sept11.1	6.92e-107	-0.456146	0.093	0.222	2.31e-102	EC_1	Sept11
Timp3	4.84e-106	-0.372173	0.321	0.518	1.62e-101	EC_1	Timp3
Tbl1xr1.1	5.74e-106	-0.486728	0.019	0.106	1.92e-101	EC_1	Tbl1xr1
Map4	5.96e-106	-0.314869	0.269	0.466	1.99e-101	EC_1	Map4
Utrn	1.15e-105	-0.352084	0.586	0.798	3.83e-101	EC_1	Utrn
Tulp4	1.4e-105	-0.340287	0.178	0.343	4.68e-101	EC_1	Tulp4
Mllt10	2.41e-105	-0.305445	0.278	0.481	8.05e-101	EC_1	Mllt10
Klf2	9.8e-105	-0.41967	0.198	0.366	3.27e-100	EC_1	Klf2
Mill2.1	2.85e-103	-0.40631	0.114	0.252	9.52e-99	EC_1	Mill2
Abca1.1	3.74e-103	-0.550256	0.029	0.119	1.25e-98	EC_1	Abca1
Tsc22d1	4.35e-103	-0.40954	0.113	0.251	1.45e-98	EC_1	Tsc22d1
Clasp2	2.03e-102	-0.312065	0.161	0.32	6.79e-98	EC_1	Clasp2
Nuak1.1	6.02e-102	-0.668434	0.027	0.115	2.01e-97	EC_1	Nuak1
Tcf12	6.88e-102	-0.290587	0.511	0.737	2.3e-97	EC_1	Tcf12
Tcf7l2	1.48e-101	-0.332856	0.167	0.326	4.96e-97	EC_1	Tcf7l2
Smg6	9.34e-101	-0.330664	0.252	0.437	3.12e-96	EC_1	Smg6
Klhl4	1.16e-100	-0.478346	0.089	0.21	3.87e-96	EC_1	Klhl4
Igf2r	2.45e-100	-0.336197	0.139	0.287	8.2e-96	EC_1	Igf2r
Nedd4	2.71e-100	-0.270938	0.25	0.441	9.06e-96	EC_1	Nedd4
Cd2ap	4.42e-100	-0.295903	0.199	0.372	1.48e-95	EC_1	Cd2ap
Esyt2	4.56e-100	-0.334433	0.147	0.297	1.52e-95	EC_1	Esyt2
Gm37240	1.48e-99	-0.349866	0.102	0.233	4.94e-95	EC_1	Gm37240
Arhgap26	3.49e-99	-0.310065	0.247	0.429	1.17e-94	EC_1	Arhgap26
Tgfbr2.1	4.43e-99	-0.404872	0.082	0.202	1.48e-94	EC_1	Tgfbr2
Lysmd4.1	2.55e-98	-0.374527	0.074	0.192	8.52e-94	EC_1	Lysmd4
5031425E22Rik	3.17e-98	-0.316445	0.084	0.207	1.06e-93	EC_1	5031425E22Rik
Stag1	9.71e-98	-0.275895	0.41	0.63	3.24e-93	EC_1	Stag1
Mast4	1.23e-97	-0.452824	0.385	0.577	4.12e-93	EC_1	Mast4
Pum2	1.42e-97	-0.258735	0.218	0.398	4.75e-93	EC_1	Pum2
Ankrd17	3.67e-97	-0.28273	0.27	0.459	1.23e-92	EC_1	Ankrd17
Rsu1	6.53e-97	-0.285055	0.249	0.433	2.18e-92	EC_1	Rsu1
Dock7.1	7.9e-97	-0.45506	0.023	0.107	2.64e-92	EC_1	Dock7
Smad7	1.07e-96	-0.379622	0.125	0.26	3.59e-92	EC_1	Smad7
Syn3	1.68e-96	-0.482055	0.068	0.177	5.61e-92	EC_1	Syn3
Iqgap1	2.49e-96	-0.294543	0.138	0.283	8.33e-92	EC_1	Iqgap1
Zfp423.1	4.51e-96	-0.440474	0.104	0.228	1.51e-91	EC_1	Zfp423
Kalrn	5.23e-96	-0.378047	0.274	0.451	1.75e-91	EC_1	Kalrn
Frmd4b	7.67e-96	-0.347938	0.183	0.338	2.56e-91	EC_1	Frmd4b
Gsk3b	8.97e-96	-0.262673	0.225	0.406	3e-91	EC_1	Gsk3b
Kras	1.83e-95	-0.335471	0.121	0.256	6.13e-91	EC_1	Kras
Parva	2.96e-95	-0.295847	0.155	0.305	9.9e-91	EC_1	Parva
Dlg1	8.07e-95	-0.416733	0.194	0.355	2.7e-90	EC_1	Dlg1
Tm4sf1	8.89e-95	-0.432511	0.146	0.287	2.97e-90	EC_1	Tm4sf1
Rere	9.17e-95	-0.275477	0.376	0.586	3.06e-90	EC_1	Rere
Rab11a	1.05e-94	-0.289753	0.111	0.243	3.52e-90	EC_1	Rab11a
Trps1	1.83e-94	-0.46685	0.136	0.27	6.12e-90	EC_1	Trps1
Tmsb4x.1	2.17e-94	-0.63422	0.245	0.406	7.24e-90	EC_1	Tmsb4x
Tmod3	8.11e-94	-0.264324	0.278	0.472	2.71e-89	EC_1	Tmod3
Ascc3	2.87e-93	-0.288929	0.168	0.322	9.61e-89	EC_1	Ascc3
Pecam1	3.58e-93	-0.302053	0.506	0.725	1.2e-88	EC_1	Pecam1
Wbp1l.1	6.29e-93	-0.361943	0.069	0.178	2.1e-88	EC_1	Wbp1l
Zmym4	1.42e-92	-0.320791	0.146	0.289	4.76e-88	EC_1	Zmym4
Dennd1b	1.79e-92	-0.286243	0.151	0.299	5.99e-88	EC_1	Dennd1b
Nr3c2.1	2.04e-92	-0.456637	0.2	0.354	6.82e-88	EC_1	Nr3c2
Nxpe2.1	2.42e-92	-0.314675	0.173	0.323	8.09e-88	EC_1	Nxpe2
Mbnl2	2.83e-92	-0.258598	0.445	0.665	9.45e-88	EC_1	Mbnl2
Atp8b1	4.19e-92	-0.423618	0.097	0.217	1.4e-87	EC_1	Atp8b1
Bcl2l1	5.6e-92	-0.267808	0.207	0.374	1.87e-87	EC_1	Bcl2l1
Atp5e.1	1.95e-91	0.999831	0.169	0.087	6.5e-87	EC_1	Atp5e
Cemip2.1	2.49e-91	-0.838343	0.092	0.205	8.32e-87	EC_1	Cemip2
Pard3b	3.03e-91	-0.319197	0.47	0.662	1.01e-86	EC_1	Pard3b
9330175M20Rik	5.21e-91	-0.481812	0.076	0.186	1.74e-86	EC_1	9330175M20Rik
Pten	6.03e-91	-0.265655	0.126	0.262	2.01e-86	EC_1	Pten
Tbc1d5	6.39e-91	-0.299598	0.262	0.442	2.14e-86	EC_1	Tbc1d5
Gm14211.1	1.66e-90	-0.37897	0.112	0.239	5.55e-86	EC_1	Gm14211
Senp6	2.41e-90	-0.29439	0.126	0.26	8.06e-86	EC_1	Senp6
Eef1a1.1	4.01e-90	-0.382072	0.112	0.238	1.34e-85	EC_1	Eef1a1
Atp11c	5.49e-90	-0.302601	0.182	0.334	1.84e-85	EC_1	Atp11c
Zfp148	6.49e-90	-0.256703	0.198	0.362	2.17e-85	EC_1	Zfp148
Sptlc2	9.66e-90	-0.261159	0.162	0.311	3.23e-85	EC_1	Sptlc2
Ndufb7.1	1.27e-89	0.960527	0.194	0.108	4.24e-85	EC_1	Ndufb7
Lyst.1	2.21e-89	-0.404757	0.062	0.164	7.38e-85	EC_1	Lyst
Fbxl17	3.37e-89	-0.254772	0.398	0.606	1.13e-84	EC_1	Fbxl17
Phf21a	4.15e-89	-0.260213	0.292	0.479	1.39e-84	EC_1	Phf21a
Gnaq	4.72e-89	-0.268297	0.46	0.68	1.58e-84	EC_1	Gnaq
Itpr1	8.01e-89	-0.305645	0.307	0.494	2.68e-84	EC_1	Itpr1
Tsc22d2	1.12e-88	-0.314676	0.143	0.281	3.73e-84	EC_1	Tsc22d2
Actn4	1.16e-88	-0.270898	0.257	0.435	3.87e-84	EC_1	Actn4
Ndufs6	1.36e-88	0.854312	0.121	0.052	4.55e-84	EC_1	Ndufs6
N4bp2l2	2.4e-88	-0.314512	0.106	0.231	8.02e-84	EC_1	N4bp2l2
Tead1	2.52e-88	-0.284501	0.14	0.279	8.43e-84	EC_1	Tead1
Cd47	3.49e-88	-0.301131	0.102	0.224	1.17e-83	EC_1	Cd47
Large1	3.88e-88	-0.304091	0.142	0.28	1.3e-83	EC_1	Large1
Apba1.1	4.88e-88	-0.577336	0.089	0.199	1.63e-83	EC_1	Apba1
Acvr1	1.05e-87	-0.346172	0.119	0.246	3.5e-83	EC_1	Acvr1
Clec2d	1.72e-87	-0.352165	0.107	0.228	5.76e-83	EC_1	Clec2d
Ly6a.1	1.86e-87	-0.394244	0.112	0.235	6.22e-83	EC_1	Ly6a
Fam172a	4.6e-87	-0.254829	0.316	0.507	1.54e-82	EC_1	Fam172a
Actn1.1	8.1e-87	-0.391246	0.049	0.142	2.71e-82	EC_1	Actn1
Zbtb16.1	1.15e-86	-0.323537	0.118	0.246	3.85e-82	EC_1	Zbtb16
Limch1	1.66e-86	-0.278024	0.25	0.421	5.56e-82	EC_1	Limch1
Dip2c	1.82e-86	-0.323796	0.306	0.484	6.07e-82	EC_1	Dip2c
Crim1	1.98e-86	-0.303129	0.323	0.514	6.62e-82	EC_1	Crim1
Ebf1	2.13e-86	-0.272238	0.718	0.877	7.13e-82	EC_1	Ebf1
Creb3l2	3.9e-86	-0.30168	0.094	0.211	1.3e-81	EC_1	Creb3l2
Nxn.1	4.77e-86	-0.349681	0.361	0.547	1.6e-81	EC_1	Nxn
Gm48678.1	5.73e-86	-0.422943	0.073	0.18	1.91e-81	EC_1	Gm48678
Itsn1.1	9.52e-86	-0.373408	0.027	0.107	3.18e-81	EC_1	Itsn1
Stim1.1	1.56e-85	-0.336743	0.104	0.223	5.23e-81	EC_1	Stim1
Uty	1.7e-85	-0.350936	0.061	0.16	5.67e-81	EC_1	Uty
Dennd5b	1.89e-85	-0.305955	0.399	0.597	6.32e-81	EC_1	Dennd5b
Id3.1	2.09e-85	-0.293405	0.132	0.265	6.99e-81	EC_1	Id3
Col4a3bp	2.25e-85	-0.296192	0.147	0.284	7.51e-81	EC_1	Col4a3bp
Atp5h.1	2.99e-85	0.923747	0.187	0.104	9.99e-81	EC_1	Atp5h
Ppp3ca	3.06e-85	-0.324657	0.488	0.687	1.02e-80	EC_1	Ppp3ca
Stxbp6	3.24e-85	-0.390008	0.266	0.426	1.08e-80	EC_1	Stxbp6
Rps6ka3	3.31e-85	-0.255695	0.17	0.316	1.11e-80	EC_1	Rps6ka3
Neat1	1.14e-84	-0.420877	0.065	0.166	3.8e-80	EC_1	Neat1
Cav2.1	6.17e-84	-0.331988	0.064	0.163	2.06e-79	EC_1	Cav2
Cdk19	2.5e-83	-0.475279	0.12	0.24	8.35e-79	EC_1	Cdk19
Cavin1.1	2.56e-83	-0.320793	0.119	0.243	8.55e-79	EC_1	Cavin1
Cped1	2.58e-83	-0.277555	0.526	0.732	8.64e-79	EC_1	Cped1
Itm2b	3.01e-83	-0.303223	0.18	0.326	1.01e-78	EC_1	Itm2b
Slco3a1.1	3.56e-83	-0.428476	0.109	0.226	1.19e-78	EC_1	Slco3a1
Zfp36l1.1	3.9e-83	-0.330474	0.085	0.193	1.3e-78	EC_1	Zfp36l1
Ehbp1	6.76e-83	-0.360376	0.039	0.125	2.26e-78	EC_1	Ehbp1
Lmo7.1	7.8e-83	-0.268031	0.178	0.325	2.61e-78	EC_1	Lmo7
Creb5.1	1.15e-82	-0.423166	0.104	0.218	3.83e-78	EC_1	Creb5
Rgs5.1	1.49e-82	-0.849073	0.031	0.107	4.97e-78	EC_1	Rgs5
Usp24	1.58e-82	-0.263033	0.094	0.209	5.27e-78	EC_1	Usp24
Gdi2	1.97e-82	-0.255452	0.14	0.273	6.58e-78	EC_1	Gdi2
Peli1	2e-82	-0.254751	0.128	0.256	6.7e-78	EC_1	Peli1
Mical3	2.6e-82	-0.317187	0.086	0.196	8.69e-78	EC_1	Mical3
Kif13a	3.47e-82	-0.266743	0.268	0.442	1.16e-77	EC_1	Kif13a
Gcnt2.1	6.24e-82	-0.364325	0.093	0.202	2.09e-77	EC_1	Gcnt2
Tln2.1	8.32e-82	-0.391066	0.061	0.157	2.78e-77	EC_1	Tln2
R3hdm1	8.99e-82	-0.250091	0.145	0.28	3.01e-77	EC_1	R3hdm1
Atp1b3.1	1.26e-81	-0.38228	0.058	0.151	4.2e-77	EC_1	Atp1b3
Pced1b	1.58e-81	-0.29368	0.137	0.268	5.3e-77	EC_1	Pced1b
Samd12	1.78e-81	-0.349214	0.398	0.576	5.96e-77	EC_1	Samd12
Chchd10	2.76e-81	0.780847	0.117	0.051	9.21e-77	EC_1	Chchd10
mt-Nd4.1	1.22e-80	-0.431241	0.083	0.188	4.09e-76	EC_1	mt-Nd4
Rhoj.1	3e-80	-0.301053	0.335	0.521	1e-75	EC_1	Rhoj
Prkag2.1	4.77e-80	-0.472492	0.061	0.154	1.59e-75	EC_1	Prkag2
Rundc3b	9.57e-80	-0.322045	0.109	0.224	3.2e-75	EC_1	Rundc3b
Nck1	1.83e-79	-0.258973	0.196	0.347	6.11e-75	EC_1	Nck1
Slmap	3.96e-79	-0.259471	0.117	0.239	1.32e-74	EC_1	Slmap
Tle4	6.45e-79	-0.251326	0.153	0.289	2.16e-74	EC_1	Tle4
Ahnak	9.71e-79	-0.291056	0.233	0.389	3.25e-74	EC_1	Ahnak
5330438D12Rik.1	2.33e-78	-0.412448	0.063	0.158	7.78e-74	EC_1	5330438D12Rik
Tanc2	2.92e-78	-0.355638	0.227	0.379	9.76e-74	EC_1	Tanc2
Osmr	3.85e-78	-0.306013	0.128	0.249	1.29e-73	EC_1	Osmr
Scmh1	4.95e-78	-0.258403	0.129	0.253	1.66e-73	EC_1	Scmh1
Stard13	5.52e-78	-0.289178	0.275	0.44	1.85e-73	EC_1	Stard13
Adam10	5.53e-78	-0.261274	0.18	0.323	1.85e-73	EC_1	Adam10
Klf4	7.41e-78	-0.30657	0.125	0.246	2.48e-73	EC_1	Klf4
Mcu	1.42e-77	-0.279114	0.187	0.328	4.73e-73	EC_1	Mcu
Gng11.1	1.54e-77	-0.326193	0.135	0.259	5.15e-73	EC_1	Gng11
Ldlrad4.1	1.81e-77	-0.258702	0.27	0.435	6.06e-73	EC_1	Ldlrad4
Arhgap21	1.84e-77	-0.285731	0.052	0.14	6.13e-73	EC_1	Arhgap21
Rgs3.1	2.54e-77	-0.306421	0.214	0.363	8.48e-73	EC_1	Rgs3
Tgm2	3.32e-77	-0.306166	0.06	0.153	1.11e-72	EC_1	Tgm2
Atp5j2.1	4.03e-77	0.900852	0.185	0.107	1.35e-72	EC_1	Atp5j2
Anxa2	6.15e-77	-0.286444	0.062	0.155	2.06e-72	EC_1	Anxa2
St3gal1	1.35e-76	-0.254215	0.154	0.287	4.52e-72	EC_1	St3gal1
Add3	2.22e-76	-0.267753	0.171	0.308	7.42e-72	EC_1	Add3
Atp13a3.1	2.48e-76	-0.517231	0.065	0.157	8.27e-72	EC_1	Atp13a3
Ifitm3.1	3.44e-76	-0.378481	0.08	0.181	1.15e-71	EC_1	Ifitm3
Palm.1	3.83e-76	-0.264624	0.138	0.263	1.28e-71	EC_1	Palm
Thsd1	3.84e-76	-0.258857	0.128	0.249	1.28e-71	EC_1	Thsd1
Mical2.1	5.49e-76	-0.382708	0.082	0.182	1.83e-71	EC_1	Mical2
Rtn4	6.04e-76	-0.2725	0.135	0.259	2.02e-71	EC_1	Rtn4
Cryab	7.59e-76	0.802898	0.113	0.05	2.54e-71	EC_1	Cryab
Txnip.1	3.45e-75	-0.328306	0.08	0.178	1.15e-70	EC_1	Txnip
Lifr.1	8.12e-75	-0.305582	0.088	0.192	2.71e-70	EC_1	Lifr
Rabgap1l	9.59e-75	-0.257963	0.216	0.366	3.2e-70	EC_1	Rabgap1l
Gng12	1.13e-74	-0.257837	0.142	0.266	3.76e-70	EC_1	Gng12
Dnm3	1.22e-74	-0.391098	0.418	0.576	4.07e-70	EC_1	Dnm3
Atp5d.1	1.27e-74	0.820294	0.148	0.076	4.24e-70	EC_1	Atp5d
Plekha5	3.42e-74	-0.303208	0.064	0.156	1.14e-69	EC_1	Plekha5
Fabp5.1	1.23e-73	-0.334641	0.071	0.166	4.1e-69	EC_1	Fabp5
Fzd6	1.45e-73	-0.268209	0.096	0.202	4.85e-69	EC_1	Fzd6
Csnk1g1	4.11e-73	-0.262006	0.135	0.257	1.37e-68	EC_1	Csnk1g1
Usp3	6.88e-73	-0.267946	0.107	0.217	2.3e-68	EC_1	Usp3
Atp5g1.1	1.11e-72	0.795966	0.141	0.072	3.72e-68	EC_1	Atp5g1
Bbx	2.56e-72	-0.254214	0.129	0.248	8.55e-68	EC_1	Bbx
Rai14.1	2.64e-72	-0.313357	0.112	0.223	8.84e-68	EC_1	Rai14
Ccser1	5.58e-72	-0.394659	0.114	0.222	1.87e-67	EC_1	Ccser1
Gm10800.1	6.71e-72	1.09008	0.175	0.1	2.24e-67	EC_1	Gm10800
Tacc2	8.44e-72	-0.321567	0.038	0.114	2.82e-67	EC_1	Tacc2
Lrrk1	2.21e-71	-0.256496	0.134	0.253	7.4e-67	EC_1	Lrrk1
Pard3bos1.1	2.31e-71	-0.431215	0.036	0.11	7.71e-67	EC_1	Pard3bos1
Tgfbr3	6.08e-71	-0.334267	0.08	0.176	2.03e-66	EC_1	Tgfbr3
Il1r1.1	7.01e-71	-0.407781	0.094	0.193	2.34e-66	EC_1	Il1r1
Abi2	9.97e-71	-0.294461	0.057	0.142	3.33e-66	EC_1	Abi2
Cdc14a.1	2.21e-70	-0.356079	0.083	0.179	7.38e-66	EC_1	Cdc14a
Cdk6	2.33e-70	-0.316977	0.06	0.147	7.78e-66	EC_1	Cdk6
S100a10	3.21e-70	-0.306988	0.032	0.104	1.07e-65	EC_1	S100a10
Stt3b.1	3.7e-70	-0.309256	0.058	0.143	1.24e-65	EC_1	Stt3b
Ptma.1	5.8e-70	-0.250685	0.166	0.296	1.94e-65	EC_1	Ptma
Wls.1	8.31e-70	-0.371906	0.033	0.105	2.78e-65	EC_1	Wls
Aopep	1.71e-69	-0.279787	0.209	0.353	5.73e-65	EC_1	Aopep
Lrrc4	1.76e-69	-0.298647	0.045	0.123	5.87e-65	EC_1	Lrrc4
Dennd4a.1	3.07e-69	-0.429573	0.061	0.146	1.03e-64	EC_1	Dennd4a
D5Ertd615e.1	4.88e-69	-0.750357	0.05	0.128	1.63e-64	EC_1	D5Ertd615e
Ankrd33b.1	7.62e-69	-0.394285	0.054	0.135	2.55e-64	EC_1	Ankrd33b
Adipor2	9.87e-69	-0.252349	0.209	0.349	3.3e-64	EC_1	Adipor2
Fam135a	1.11e-68	-0.363793	0.085	0.181	3.7e-64	EC_1	Fam135a
Arrb1.1	1.21e-68	-0.338443	0.031	0.1	4.03e-64	EC_1	Arrb1
Wwox	1.24e-68	-0.297323	0.222	0.359	4.13e-64	EC_1	Wwox
Tdrd3	2.8e-68	-0.270844	0.077	0.17	9.35e-64	EC_1	Tdrd3
Atp5b.1	4.19e-68	0.926768	0.222	0.147	1.4e-63	EC_1	Atp5b
Sox18.1	4.77e-68	-0.30694	0.044	0.12	1.6e-63	EC_1	Sox18
Mllt3	8.53e-68	-0.277712	0.109	0.214	2.85e-63	EC_1	Mllt3
Rps6ka5.1	1.31e-67	-0.324125	0.051	0.131	4.39e-63	EC_1	Rps6ka5
Prcp	1.52e-67	-0.315001	0.083	0.177	5.08e-63	EC_1	Prcp
Dleu2	1.55e-67	-0.288457	0.284	0.437	5.18e-63	EC_1	Dleu2
Ndufa5	4.57e-67	0.837949	0.117	0.056	1.53e-62	EC_1	Ndufa5
Dpysl3	5.78e-67	-0.385537	0.072	0.16	1.93e-62	EC_1	Dpysl3
Id1.1	9.65e-67	-0.258127	0.203	0.341	3.22e-62	EC_1	Id1
Man2a1	9.67e-67	-0.255509	0.207	0.347	3.23e-62	EC_1	Man2a1
Megf9	1.32e-66	-0.321214	0.066	0.152	4.4e-62	EC_1	Megf9
Mpp7.1	1.44e-66	-0.448385	0.042	0.116	4.8e-62	EC_1	Mpp7
Ltbp1	1.53e-66	-0.412183	0.095	0.192	5.1e-62	EC_1	Ltbp1
Prickle1	1.85e-66	-0.292045	0.069	0.156	6.19e-62	EC_1	Prickle1
Wwp1	7.05e-66	-0.258371	0.072	0.161	2.36e-61	EC_1	Wwp1
Calm1.1	7.15e-66	-0.289254	0.135	0.247	2.39e-61	EC_1	Calm1
Abhd17b	1.42e-65	-0.365883	0.048	0.124	4.75e-61	EC_1	Abhd17b
Azin1.1	2.77e-65	-0.490704	0.054	0.133	9.27e-61	EC_1	Azin1
Ccnd2	4.33e-65	-0.257317	0.065	0.149	1.45e-60	EC_1	Ccnd2
Tbc1d1	6.25e-65	-0.261458	0.106	0.208	2.09e-60	EC_1	Tbc1d1
Mecom.1	6.85e-65	-0.323587	0.695	0.818	2.29e-60	EC_1	Mecom
Gm35188	7.57e-65	-0.309197	0.047	0.122	2.53e-60	EC_1	Gm35188
Stox2	9.89e-65	-0.279028	0.651	0.795	3.31e-60	EC_1	Stox2
Nmt2	1.56e-64	-0.262879	0.057	0.137	5.22e-60	EC_1	Nmt2
Upp2.1	1.6e-64	-0.322392	0.051	0.128	5.34e-60	EC_1	Upp2
Ndufb8	2.47e-64	0.726766	0.107	0.05	8.24e-60	EC_1	Ndufb8
Ppia.1	2.76e-64	-0.27162	0.06	0.142	9.23e-60	EC_1	Ppia
Ephx1.1	3.21e-64	-0.265735	0.049	0.126	1.07e-59	EC_1	Ephx1
Thbd	3.61e-64	-0.256664	0.056	0.136	1.21e-59	EC_1	Thbd
Cox4i1	5.2e-64	0.9163	0.131	0.068	1.74e-59	EC_1	Cox4i1
Gm46367	6.17e-63	-0.35467	0.04	0.111	2.06e-58	EC_1	Gm46367
Acyp2	7.15e-63	-0.364299	0.054	0.132	2.39e-58	EC_1	Acyp2
Meis1	2.9e-62	-0.34014	0.045	0.118	9.71e-58	EC_1	Meis1
Ppp1r12b	5.28e-62	-0.279211	0.046	0.12	1.76e-57	EC_1	Ppp1r12b
Smc4	1.59e-61	-0.324336	0.035	0.101	5.33e-57	EC_1	Smc4
St6gal1.1	8.05e-61	-0.311858	0.084	0.173	2.69e-56	EC_1	St6gal1
Nr6a1	2.66e-60	-0.349475	0.037	0.103	8.89e-56	EC_1	Nr6a1
Shroom2	6.04e-60	-0.314642	0.044	0.115	2.02e-55	EC_1	Shroom2
Cox5b	9.48e-60	0.760562	0.109	0.054	3.17e-55	EC_1	Cox5b
Gm15614.1	1.76e-59	-0.250274	0.104	0.201	5.88e-55	EC_1	Gm15614
Tfdp2	1.99e-59	-0.26755	0.037	0.104	6.66e-55	EC_1	Tfdp2
Ly6c1.1	2.01e-59	-0.254379	0.13	0.235	6.72e-55	EC_1	Ly6c1
Smad6.1	2.19e-59	-0.483341	0.07	0.149	7.32e-55	EC_1	Smad6
Cox6b1.1	2.77e-59	0.824073	0.148	0.085	9.24e-55	EC_1	Cox6b1
mt-Co1.1	1.26e-58	0.836442	0.451	0.393	4.2e-54	EC_1	mt-Co1
Cox5a	1.38e-58	0.797741	0.135	0.074	4.61e-54	EC_1	Cox5a
Acer3.1	5.48e-58	-0.274862	0.063	0.14	1.83e-53	EC_1	Acer3
Ech1	4.04e-57	0.75174	0.11	0.055	1.35e-52	EC_1	Ech1
Atp5a1.1	1.1e-56	0.85043	0.158	0.095	3.67e-52	EC_1	Atp5a1
Pdcd4	4.76e-56	-0.251474	0.046	0.114	1.59e-51	EC_1	Pdcd4
Rnf217	1.42e-55	-0.263152	0.052	0.123	4.76e-51	EC_1	Rnf217
Chn2	4.41e-55	-0.269574	0.132	0.231	1.47e-50	EC_1	Chn2
Gm12353	8.12e-55	-0.267812	0.042	0.107	2.71e-50	EC_1	Gm12353
Gm15581.1	1.04e-54	-0.259567	0.1	0.191	3.46e-50	EC_1	Gm15581
Fbln2.1	1.88e-54	-0.311084	0.044	0.11	6.28e-50	EC_1	Fbln2
Map3k20	1.91e-54	-0.260392	0.041	0.105	6.39e-50	EC_1	Map3k20
Lama3	2.34e-54	-0.435653	0.039	0.101	7.82e-50	EC_1	Lama3
Itpkb.1	2.14e-52	0.34961	0.79	0.805	7.17e-48	EC_1	Itpkb
Insyn2a.1	3.6e-52	-0.280007	0.051	0.119	1.2e-47	EC_1	Insyn2a
Jag1.1	5.94e-52	-0.306866	0.044	0.107	1.98e-47	EC_1	Jag1
Cxcl12.1	7.34e-52	-0.451625	0.232	0.348	2.45e-47	EC_1	Cxcl12
Fam198b.1	1.88e-49	-0.344556	0.045	0.105	6.27e-45	EC_1	Fam198b
Flt4	2.08e-48	-0.3109	0.073	0.145	6.94e-44	EC_1	Flt4
Gm15564	5.59e-47	0.598754	0.104	0.055	1.87e-42	EC_1	Gm15564
Rasa4.1	1.73e-46	-0.397032	0.073	0.143	5.78e-42	EC_1	Rasa4
Rps6ka2.1	3.16e-46	-0.547314	0.154	0.249	1.06e-41	EC_1	Rps6ka2
Ldb2	3.71e-46	-0.282124	0.533	0.681	1.24e-41	EC_1	Ldb2
Acaa2	3.79e-46	0.69351	0.109	0.06	1.27e-41	EC_1	Acaa2
Aldoa.1	2.09e-45	0.804539	0.156	0.101	6.98e-41	EC_1	Aldoa
Cox7c.1	1.65e-43	0.774062	0.2	0.143	5.51e-39	EC_1	Cox7c
Ctdspl	4.74e-43	-0.284834	0.044	0.1	1.58e-38	EC_1	Ctdspl
9630028H03Rik.1	7.7e-43	-0.274415	0.059	0.122	2.57e-38	EC_1	9630028H03Rik
Eda	5.77e-41	-0.347558	0.046	0.1	1.93e-36	EC_1	Eda
Gm20388	4.36e-40	-0.277072	0.069	0.131	1.46e-35	EC_1	Gm20388
Sdhb	7.23e-40	0.640498	0.1	0.056	2.42e-35	EC_1	Sdhb
Hexb.1	3.37e-37	0.610937	0.326	0.277	1.13e-32	EC_1	Hexb
Atp5l	1.46e-36	0.732996	0.126	0.079	4.88e-32	EC_1	Atp5l
Myo10.1	4.93e-32	0.353971	0.615	0.587	1.65e-27	EC_1	Myo10
Arl15.1	7.93e-32	-0.387865	0.554	0.698	2.65e-27	EC_1	Arl15
Cdk8.1	2.22e-31	0.510906	0.468	0.439	7.43e-27	EC_1	Cdk8
Cox6c	4.35e-31	0.741068	0.144	0.1	1.45e-26	EC_1	Cox6c
Ndufa4	6.96e-31	0.723858	0.151	0.107	2.33e-26	EC_1	Ndufa4
Egfl7	1.26e-30	0.438072	0.634	0.681	4.21e-26	EC_1	Egfl7
Egr1.1	3.26e-19	0.484964	0.309	0.276	1.09e-14	EC_1	Egr1
Mdh2	1.37e-18	0.550566	0.104	0.074	4.59e-14	EC_1	Mdh2
Uqcrh	1.88e-18	0.596038	0.109	0.079	6.27e-14	EC_1	Uqcrh
Ushbp1	3.09e-18	0.440841	0.476	0.505	1.03e-13	EC_1	Ushbp1
Il31ra.1	2.58e-17	0.544774	0.222	0.192	8.63e-13	EC_1	Il31ra
Nr4a1	1.71e-13	0.577614	0.183	0.156	5.72e-09	EC_1	Nr4a1
Adamts9.1	6.1e-13	0.295077	0.571	0.577	2.04e-08	EC_1	Adamts9
Ablim3.1	1.34e-12	0.282349	0.56	0.577	4.47e-08	EC_1	Ablim3
Gphn	3.5e-11	0.326119	0.686	0.747	1.17e-06	EC_1	Gphn
Itga6.1	1.56e-09	0.306691	0.599	0.645	5.2e-05	EC_1	Itga6
Rps2	3.58e-09	0.44783	0.103	0.084	0.000119562	EC_1	Rps2
Slc28a2.1	4.4e-09	0.337637	0.429	0.449	0.0001469	EC_1	Slc28a2
Gm12002.1	1.65e-08	0.300832	0.302	0.286	0.000553018	EC_1	Gm12002
Fabp4.1	1.79e-08	-0.360003	0.669	0.714	0.000597226	EC_1	Fabp4
Col4a2.1	1.95e-08	0.273439	0.529	0.556	0.000651944	EC_1	Col4a2
Gm48099	2.08e-07	0.549026	0.172	0.159	0.00695012	EC_1	Gm48099
Rpl36	7.38e-07	0.485399	0.126	0.112	0.0246772	EC_1	Rpl36
Rapgef4.1	1.89e-06	0.317345	0.4	0.414	0.0631686	EC_1	Rapgef4
Slc25a3	2.25e-05	0.486211	0.161	0.151	0.752514	EC_1	Slc25a3
Snrk.1	7.29e-05	0.256421	0.567	0.645	1	EC_1	Snrk
Xdh.1	0.000300919	0.27681	0.466	0.511	1	EC_1	Xdh
Robo4	0.000606224	0.26521	0.2	0.244	1	EC_1	Robo4
Rpl8	0.00103543	0.250917	0.128	0.155	1	EC_1	Rpl8
Atp5c1	0.00129648	0.416116	0.106	0.098	1	EC_1	Atp5c1
Rps9	0.00265405	0.280664	0.112	0.135	1	EC_1	Rps9
Bsg.1	0.00356635	0.41999	0.119	0.113	1	EC_1	Bsg
Map4k2	0.00447392	0.258979	0.182	0.218	1	EC_1	Map4k2
H2-Q4	0.00525076	0.25098	0.123	0.146	1	EC_1	H2-Q4
Efr3b.1	0.00573822	0.338007	0.288	0.303	1	EC_1	Efr3b
Dlg2.1	0.00650833	0.271139	0.255	0.248	1	EC_1	Dlg2
Rpl28	0.00819352	0.264753	0.119	0.142	1	EC_1	Rpl28
Kirrel3.2	0	3.6381	0.557	0.057	0	EC_2	Kirrel3
Thsd7a.2	0	2.29429	0.722	0.182	0	EC_2	Thsd7a
Kcnc2.1	0	2.09015	0.302	0.038	0	EC_2	Kcnc2
Vegfc.2	0	2.0782	0.712	0.163	0	EC_2	Vegfc
G630055G22Rik	0	1.96802	0.17	0.013	0	EC_2	G630055G22Rik
Eln.2	0	1.92634	0.434	0.091	0	EC_2	Eln
Entpd1.2	0	1.89171	0.626	0.179	0	EC_2	Entpd1
Rasa4.2	0	1.88037	0.402	0.085	0	EC_2	Rasa4
Vwf.2	0	1.86824	0.365	0.067	0	EC_2	Vwf
Calcrl.2	0	1.73253	0.756	0.396	0	EC_2	Calcrl
Piezo2	0	1.65113	0.298	0.031	0	EC_2	Piezo2
Il1r1.2	0	1.59911	0.452	0.126	0	EC_2	Il1r1
Samd5.1	0	1.56555	0.445	0.109	0	EC_2	Samd5
Myrip.2	0	1.49047	0.304	0.052	0	EC_2	Myrip
Dnm3.1	0	1.45584	0.862	0.486	0	EC_2	Dnm3
Setbp1.2	0	1.44448	0.488	0.127	0	EC_2	Setbp1
Hdac9	0	1.40889	0.925	0.575	0	EC_2	Hdac9
Fmo2.1	0	1.40029	0.427	0.143	0	EC_2	Fmo2
Dock11	0	1.39291	0.25	0.029	0	EC_2	Dock11
Zbtb7c.1	0	1.39064	0.241	0.045	0	EC_2	Zbtb7c
Lhx6	0	1.33215	0.279	0.047	0	EC_2	Lhx6
Cers6	0	1.27596	0.22	0.03	0	EC_2	Cers6
Kcnb1	0	1.21361	0.512	0.209	0	EC_2	Kcnb1
Stox2.1	0	1.11211	0.951	0.727	0	EC_2	Stox2
Cysltr1	0	1.08223	0.143	0.009	0	EC_2	Cysltr1
Col13a1	0	0.781863	0.105	0.004	0	EC_2	Col13a1
Myo10.2	0	-2.28358	0.201	0.65	0	EC_2	Myo10
Btnl9.1	3.04e-304	-2.21247	0.035	0.381	1.02e-299	EC_2	Btnl9
Nuak1.2	1.05e-281	1.14882	0.263	0.066	3.51e-277	EC_2	Nuak1
Ablim3.2	1.31e-265	-1.39774	0.306	0.61	4.37e-261	EC_2	Ablim3
Slco2a1	1.06e-263	1.09458	0.196	0.04	3.56e-259	EC_2	Slco2a1
Nr2f2.2	2.38e-262	1.09694	0.253	0.065	7.94e-258	EC_2	Nr2f2
Rab27a.1	8.75e-255	1.04092	0.224	0.053	2.93e-250	EC_2	Rab27a
Rnf165	1.77e-246	0.730559	0.107	0.011	5.92e-242	EC_2	Rnf165
Ablim2	5.23e-246	0.853769	0.14	0.021	1.75e-241	EC_2	Ablim2
Rbms3.2	5.35e-244	0.97497	0.276	0.078	1.79e-239	EC_2	Rbms3
Actn1.2	2.21e-242	1.02735	0.294	0.091	7.39e-238	EC_2	Actn1
Pdia5	1.05e-241	0.865645	0.135	0.02	3.52e-237	EC_2	Pdia5
Fbn1.2	3.82e-229	1.06793	0.548	0.283	1.28e-224	EC_2	Fbn1
Ncald	6.1e-229	1.04906	0.532	0.26	2.04e-224	EC_2	Ncald
Insr.2	4.28e-216	1.26935	0.325	0.119	1.43e-211	EC_2	Insr
Vcam1.1	5.49e-215	1.03668	0.206	0.052	1.83e-210	EC_2	Vcam1
AU021092	1.94e-211	0.815741	0.155	0.03	6.49e-207	EC_2	AU021092
Ptgs1	4.41e-208	0.895366	0.207	0.054	1.48e-203	EC_2	Ptgs1
Rapgef4.2	1.25e-201	-1.42143	0.161	0.445	4.18e-197	EC_2	Rapgef4
2310002F09Rik	1.22e-198	1.00865	0.191	0.048	4.06e-194	EC_2	2310002F09Rik
Fmo1	2.78e-193	0.881741	0.56	0.31	9.28e-189	EC_2	Fmo1
Shtn1	7.97e-191	0.872983	0.185	0.046	2.66e-186	EC_2	Shtn1
Tln2.2	1.55e-188	0.933542	0.296	0.107	5.17e-184	EC_2	Tln2
Zfp423.2	6.81e-186	0.941532	0.384	0.167	2.28e-181	EC_2	Zfp423
Slfn3	9.26e-185	0.921994	0.282	0.1	3.09e-180	EC_2	Slfn3
Zfpm2.2	3.31e-183	0.998457	0.258	0.085	1.11e-178	EC_2	Zfpm2
Foxp1.2	1.73e-181	0.751115	0.822	0.63	5.78e-177	EC_2	Foxp1
Col4a2.2	1.83e-177	-1.14168	0.341	0.578	6.1e-173	EC_2	Col4a2
Map4k3.1	3.96e-174	-1.06818	0.38	0.605	1.32e-169	EC_2	Map4k3
Col8a1.2	5.67e-172	0.993772	0.207	0.06	1.9e-167	EC_2	Col8a1
Ptprb	2.93e-169	0.667522	0.894	0.76	9.78e-165	EC_2	Ptprb
Ankrd33b.2	3.26e-169	0.930126	0.259	0.092	1.09e-164	EC_2	Ankrd33b
Fry	3.51e-165	0.672991	0.815	0.621	1.17e-160	EC_2	Fry
Car8	1.18e-163	0.757123	0.674	0.438	3.94e-159	EC_2	Car8
Pgm5.2	1.16e-159	0.879195	0.302	0.121	3.88e-155	EC_2	Pgm5
Ptprg	1.14e-157	0.5566	0.963	0.904	3.81e-153	EC_2	Ptprg
Sulf1.2	1.59e-156	0.960703	0.194	0.058	5.33e-152	EC_2	Sulf1
Ptprm.1	3.4e-153	-0.508666	0.938	0.943	1.14e-148	EC_2	Ptprm
Samd12.1	8.57e-152	0.78977	0.71	0.501	2.87e-147	EC_2	Samd12
Kdr.1	1.01e-151	-1.08347	0.326	0.543	3.38e-147	EC_2	Kdr
Gm12002.2	2.13e-150	-1.60273	0.094	0.318	7.13e-146	EC_2	Gm12002
Col4a1.1	3.26e-149	-1.03162	0.391	0.597	1.09e-144	EC_2	Col4a1
Dlg2.2	1.37e-148	-2.00994	0.061	0.276	4.59e-144	EC_2	Dlg2
Kif13a.1	3.43e-147	0.782004	0.584	0.367	1.15e-142	EC_2	Kif13a
Arhgap18.1	7.38e-146	-1.12283	0.382	0.58	2.47e-141	EC_2	Arhgap18
Mras	2.76e-143	0.650053	0.113	0.023	9.24e-139	EC_2	Mras
Pdgfb.1	8.01e-141	-1.1951	0.141	0.365	2.68e-136	EC_2	Pdgfb
Efnb2	3.32e-139	-1.368	0.095	0.31	1.11e-134	EC_2	Efnb2
Heg1.2	1.45e-137	0.556444	0.822	0.66	4.86e-133	EC_2	Heg1
Mgat4a	1.11e-135	0.75911	0.541	0.329	3.71e-131	EC_2	Mgat4a
9530026P05Rik.1	1.37e-135	0.861908	0.562	0.354	4.57e-131	EC_2	9530026P05Rik
Cd9.2	3.99e-133	0.80753	0.289	0.125	1.33e-128	EC_2	Cd9
Adamts9.2	1.8e-131	-1.00354	0.399	0.601	6.02e-127	EC_2	Adamts9
Tcf4.1	7.35e-131	-0.557208	0.91	0.926	2.46e-126	EC_2	Tcf4
St6gal1.2	4.46e-130	0.840193	0.293	0.128	1.49e-125	EC_2	St6gal1
Ccser1.1	3.57e-128	0.822359	0.351	0.17	1.19e-123	EC_2	Ccser1
Cldn5.1	6.05e-123	-1.3045	0.021	0.194	2.02e-118	EC_2	Cldn5
Rps6kl1	2e-122	0.613824	0.158	0.048	6.68e-118	EC_2	Rps6kl1
Klf4.1	6.07e-120	0.759177	0.371	0.191	2.03e-115	EC_2	Klf4
Tmtc2	3.28e-119	0.517667	0.824	0.644	1.1e-114	EC_2	Tmtc2
Klf12.2	5.96e-117	0.587375	0.703	0.516	1.99e-112	EC_2	Klf12
Itpkb.2	8.97e-116	-0.676471	0.727	0.811	3e-111	EC_2	Itpkb
Rasal2.1	1.43e-114	0.514808	0.86	0.732	4.77e-110	EC_2	Rasal2
Eda.1	1.91e-113	0.993232	0.191	0.07	6.39e-109	EC_2	Eda
Sema3d	1.61e-110	0.530787	0.107	0.026	5.38e-106	EC_2	Sema3d
Unc5b	5.34e-109	-1.09956	0.007	0.154	1.78e-104	EC_2	Unc5b
Adarb1.1	3.16e-108	-1.03558	0.203	0.396	1.06e-103	EC_2	Adarb1
D5Ertd615e.2	1.58e-107	0.787913	0.221	0.09	5.27e-103	EC_2	D5Ertd615e
Dock7.2	8.54e-107	0.698209	0.186	0.069	2.85e-102	EC_2	Dock7
Adamtsl3	2.58e-106	0.713996	0.152	0.05	8.61e-102	EC_2	Adamtsl3
Itga9.2	7.2e-105	0.620166	0.293	0.138	2.41e-100	EC_2	Itga9
Palm.2	2.73e-103	0.689253	0.377	0.208	9.11e-99	EC_2	Palm
Lrrc3b.1	4.21e-103	-1.40703	0.013	0.158	1.41e-98	EC_2	Lrrc3b
Lrrk1.1	2.27e-101	0.710568	0.363	0.2	7.57e-97	EC_2	Lrrk1
Ralgapa2.2	1.74e-100	0.573272	0.382	0.207	5.82e-96	EC_2	Ralgapa2
Plxna2.1	2.84e-100	-0.794187	0.47	0.622	9.48e-96	EC_2	Plxna2
Cadps2.2	4.14e-100	0.764045	0.328	0.171	1.38e-95	EC_2	Cadps2
Ephb4	4.14e-100	0.693504	0.41	0.241	1.38e-95	EC_2	Ephb4
Numb.1	6.25e-100	0.633591	0.658	0.502	2.09e-95	EC_2	Numb
Pard3b.1	5.75e-99	0.501122	0.759	0.588	1.92e-94	EC_2	Pard3b
Lyst.2	1.35e-98	0.764349	0.255	0.119	4.5e-94	EC_2	Lyst
Sparcl1.1	1.72e-98	-0.954005	0.201	0.385	5.75e-94	EC_2	Sparcl1
Tshz2	3.98e-97	0.450277	0.886	0.737	1.33e-92	EC_2	Tshz2
Arhgap26.1	8.89e-95	0.634447	0.537	0.356	2.97e-90	EC_2	Arhgap26
Adamtsl1	1.66e-94	0.557812	0.108	0.03	5.54e-90	EC_2	Adamtsl1
Slc6a6	1.89e-94	0.574464	0.57	0.381	6.31e-90	EC_2	Slc6a6
Dpysl3.1	1.55e-92	0.739698	0.253	0.119	5.18e-88	EC_2	Dpysl3
Itga1.1	1.9e-91	-0.773852	0.458	0.61	6.34e-87	EC_2	Itga1
Rora.1	8.77e-91	0.671489	0.581	0.408	2.93e-86	EC_2	Rora
Synpo	5.3e-90	0.554682	0.131	0.043	1.77e-85	EC_2	Synpo
Arhgef28	6.69e-90	-1.04258	0.109	0.271	2.24e-85	EC_2	Arhgef28
Mctp1	4.63e-89	1.00512	0.127	0.042	1.55e-84	EC_2	Mctp1
Tmtc1.2	5.83e-89	0.592226	0.623	0.452	1.95e-84	EC_2	Tmtc1
Prcp.1	7.54e-89	0.658156	0.271	0.134	2.52e-84	EC_2	Prcp
Arl15.2	1.41e-88	-1.13825	0.559	0.672	4.71e-84	EC_2	Arl15
Pdgfd.1	3.82e-88	-0.817951	0.591	0.693	1.28e-83	EC_2	Pdgfd
Gja1.1	5.91e-88	-1.10875	0.018	0.15	1.98e-83	EC_2	Gja1
Cxxc4	1.13e-87	0.554232	0.123	0.04	3.77e-83	EC_2	Cxxc4
Zmiz1	4.08e-84	0.599747	0.539	0.38	1.36e-79	EC_2	Zmiz1
Flt1	5.04e-83	0.349886	0.918	0.807	1.69e-78	EC_2	Flt1
Jam3.1	3.15e-82	-0.952202	0.116	0.274	1.05e-77	EC_2	Jam3
Rhoj.2	6.68e-82	0.57493	0.613	0.449	2.23e-77	EC_2	Rhoj
Stmn2	8.35e-82	0.599494	0.147	0.055	2.79e-77	EC_2	Stmn2
Ptprr	2.46e-81	0.592371	0.138	0.05	8.23e-77	EC_2	Ptprr
Thsd1.1	7.74e-81	0.666898	0.342	0.198	2.59e-76	EC_2	Thsd1
St8sia4.1	1.44e-80	-0.88082	0.198	0.363	4.82e-76	EC_2	St8sia4
Xylt1.1	9.48e-80	-1.01213	0.011	0.127	3.17e-75	EC_2	Xylt1
Trpv4	2.46e-79	0.503524	0.12	0.041	8.21e-75	EC_2	Trpv4
Ednrb.1	8.11e-79	-1.05981	0.077	0.221	2.71e-74	EC_2	Ednrb
Itga6.2	1e-78	-0.783852	0.525	0.648	3.35e-74	EC_2	Itga6
Cyp26b1	1.25e-78	0.580877	0.118	0.04	4.19e-74	EC_2	Cyp26b1
Cobl.1	2.09e-78	-0.963247	0.043	0.175	6.97e-74	EC_2	Cobl
Lamb1.1	2.15e-78	-0.93052	0.034	0.162	7.19e-74	EC_2	Lamb1
Sparc.1	7e-78	-0.901815	0.119	0.273	2.34e-73	EC_2	Sparc
Msi2.1	2.91e-77	0.581774	0.431	0.272	9.72e-73	EC_2	Msi2
Irak3	7.1e-77	0.582978	0.164	0.068	2.37e-72	EC_2	Irak3
Tspan14.1	1.91e-76	-0.805551	0.053	0.189	6.38e-72	EC_2	Tspan14
Rai14.2	9.04e-75	0.634912	0.312	0.175	3.02e-70	EC_2	Rai14
Pkn3	1.08e-74	0.562699	0.159	0.065	3.61e-70	EC_2	Pkn3
1700025G04Rik	1.41e-74	0.562034	0.516	0.357	4.71e-70	EC_2	1700025G04Rik
Snrk.2	5.13e-74	-0.628661	0.513	0.639	1.71e-69	EC_2	Snrk
Stxbp6.1	6.24e-74	0.553501	0.526	0.361	2.08e-69	EC_2	Stxbp6
Igfbp7.1	2.19e-73	-0.978932	0.297	0.449	7.31e-69	EC_2	Igfbp7
Ube2e2.1	2.35e-73	0.619763	0.447	0.291	7.86e-69	EC_2	Ube2e2
Mob2	2.36e-73	0.603313	0.357	0.216	7.89e-69	EC_2	Mob2
Bmpr2.1	3.35e-73	0.566426	0.544	0.389	1.12e-68	EC_2	Bmpr2
Akap13.1	2.56e-72	0.580772	0.595	0.447	8.55e-68	EC_2	Akap13
Pdzd2	3.26e-72	0.48211	0.671	0.512	1.09e-67	EC_2	Pdzd2
Cd300lg.1	3.45e-72	-0.775749	0.248	0.403	1.15e-67	EC_2	Cd300lg
Pard3.2	3.83e-72	0.569305	0.252	0.128	1.28e-67	EC_2	Pard3
Ets1.1	4.15e-72	-0.623359	0.528	0.642	1.39e-67	EC_2	Ets1
Ptprj	8.53e-72	0.306558	0.12	0.042	2.85e-67	EC_2	Ptprj
Elmo1.1	1.08e-71	0.367349	0.843	0.716	3.62e-67	EC_2	Elmo1
Dll4.1	1.88e-71	-0.788878	0.023	0.136	6.29e-67	EC_2	Dll4
Flrt2.2	3.52e-71	0.411378	0.234	0.116	1.18e-66	EC_2	Flrt2
Kalrn.1	1.49e-70	0.490335	0.54	0.383	4.99e-66	EC_2	Kalrn
9330175M20Rik.1	3.45e-70	0.695427	0.262	0.14	1.15e-65	EC_2	9330175M20Rik
Dlc1.1	1.44e-69	-0.836115	0.318	0.466	4.81e-65	EC_2	Dlc1
Syt7	6.22e-69	0.542152	0.195	0.092	2.08e-64	EC_2	Syt7
Ncoa3	1.73e-68	0.586672	0.445	0.301	5.77e-64	EC_2	Ncoa3
Prkag2.2	4.84e-68	0.511607	0.227	0.114	1.62e-63	EC_2	Prkag2
Egr1.2	9.81e-68	-0.92298	0.157	0.304	3.28e-63	EC_2	Egr1
Magi1	2.53e-67	0.336144	0.917	0.845	8.46e-63	EC_2	Magi1
Nr3c2.2	3.15e-67	0.609331	0.443	0.293	1.05e-62	EC_2	Nr3c2
Klf2.1	7.58e-67	0.535698	0.452	0.301	2.53e-62	EC_2	Klf2
Bcam	9.16e-67	0.579386	0.234	0.122	3.06e-62	EC_2	Bcam
Kctd12b.1	1.43e-66	-0.92331	0.027	0.135	4.79e-62	EC_2	Kctd12b
Eps8.2	2.72e-66	0.426937	0.231	0.116	9.1e-62	EC_2	Eps8
Lrch1	8.34e-66	0.49597	0.626	0.487	2.79e-61	EC_2	Lrch1
Stim2	2.24e-65	0.54744	0.5	0.358	7.5e-61	EC_2	Stim2
Ntn1.2	3.96e-65	0.2909	0.176	0.079	1.32e-60	EC_2	Ntn1
Cavin2	4.93e-65	0.479032	0.601	0.449	1.65e-60	EC_2	Cavin2
Tgm2.1	9.39e-65	0.664312	0.219	0.114	3.14e-60	EC_2	Tgm2
Papln.1	6.79e-64	-0.773472	0.021	0.123	2.27e-59	EC_2	Papln
Zfp521.2	9.08e-64	0.497565	0.484	0.332	3.03e-59	EC_2	Zfp521
Shb	1.81e-63	0.472545	0.127	0.05	6.06e-59	EC_2	Shb
Adgrl2.1	2.5e-63	0.3475	0.758	0.612	8.35e-59	EC_2	Adgrl2
Prelid2	3.31e-63	0.462917	0.102	0.035	1.11e-58	EC_2	Prelid2
Gcnt2.2	4.61e-63	0.545534	0.278	0.157	1.54e-58	EC_2	Gcnt2
Cd59a	4.69e-63	0.521055	0.123	0.049	1.57e-58	EC_2	Cd59a
Dgkd.1	1.08e-62	-0.804574	0.137	0.274	3.62e-58	EC_2	Dgkd
Stim1.2	1.4e-62	0.608501	0.297	0.175	4.67e-58	EC_2	Stim1
Tpst1	2.43e-62	-0.741765	0.032	0.138	8.14e-58	EC_2	Tpst1
Lima1.2	3.07e-62	0.570849	0.404	0.266	1.03e-57	EC_2	Lima1
Prkd1.1	4.2e-62	-0.775944	0.281	0.426	1.4e-57	EC_2	Prkd1
Adamts10.1	1.53e-61	0.580136	0.232	0.124	5.13e-57	EC_2	Adamts10
Csgalnact1.1	7.02e-61	0.436695	0.564	0.412	2.34e-56	EC_2	Csgalnact1
Gramd4	8.83e-61	0.481138	0.132	0.054	2.95e-56	EC_2	Gramd4
Tbl1xr1.2	1.35e-60	0.535294	0.158	0.071	4.52e-56	EC_2	Tbl1xr1
Pkp4	1.73e-60	0.414529	0.696	0.559	5.77e-56	EC_2	Pkp4
Arap2.1	6.68e-60	-0.746795	0.067	0.187	2.23e-55	EC_2	Arap2
Rdx.1	1.37e-59	0.637187	0.329	0.206	4.59e-55	EC_2	Rdx
Robo2	3.67e-59	0.758134	0.298	0.179	1.23e-54	EC_2	Robo2
St3gal4.2	1.26e-58	0.627573	0.338	0.215	4.22e-54	EC_2	St3gal4
Trerf1	2.06e-58	0.572518	0.128	0.053	6.89e-54	EC_2	Trerf1
Efr3b.2	2.39e-58	-0.781593	0.182	0.316	7.98e-54	EC_2	Efr3b
Tspan7	4.44e-58	0.419872	0.666	0.519	1.48e-53	EC_2	Tspan7
Map3k5.1	1.27e-57	-0.710077	0.18	0.317	4.23e-53	EC_2	Map3k5
Mical2.2	1.62e-57	0.510379	0.252	0.141	5.42e-53	EC_2	Mical2
Lnx1.1	1.7e-57	-0.654117	0.28	0.424	5.68e-53	EC_2	Lnx1
Nav1.1	1.79e-57	-0.620897	0.482	0.59	5.98e-53	EC_2	Nav1
Pltp	3.59e-57	0.507782	0.134	0.058	1.2e-52	EC_2	Pltp
Atp6v1b2	8.82e-57	0.591876	0.154	0.071	2.95e-52	EC_2	Atp6v1b2
4930523C07Rik.1	1.47e-56	-0.761214	0.181	0.315	4.91e-52	EC_2	4930523C07Rik
St3gal1.1	1.58e-56	0.547705	0.36	0.235	5.29e-52	EC_2	St3gal1
Fgfr3	2.13e-56	0.412871	0.1	0.037	7.13e-52	EC_2	Fgfr3
Rassf9	2.17e-55	0.507339	0.416	0.282	7.26e-51	EC_2	Rassf9
Mill2.2	2.52e-55	0.54241	0.318	0.199	8.43e-51	EC_2	Mill2
Arrb1.2	3.98e-55	0.554614	0.152	0.071	1.33e-50	EC_2	Arrb1
Tek	1.65e-54	0.422329	0.633	0.503	5.52e-50	EC_2	Tek
Hspg2.1	2.51e-54	-0.530997	0.494	0.6	8.37e-50	EC_2	Hspg2
Pakap.1	3.4e-54	0.510007	0.617	0.497	1.14e-49	EC_2	Pakap.1
Tes	5.23e-54	0.468818	0.143	0.065	1.75e-49	EC_2	Tes
Rftn1	5.34e-54	0.418799	0.729	0.611	1.78e-49	EC_2	Rftn1
St3gal6	7.31e-54	0.544564	0.392	0.267	2.44e-49	EC_2	St3gal6
St5.1	7.56e-54	-0.693962	0.209	0.341	2.53e-49	EC_2	St5
Ushbp1.1	8.88e-54	-0.545785	0.376	0.514	2.97e-49	EC_2	Ushbp1
Sema7a.1	1.48e-53	-0.697193	0.056	0.162	4.93e-49	EC_2	Sema7a
Nrp1.1	1.85e-53	-0.488761	0.693	0.755	6.18e-49	EC_2	Nrp1
Pparg.1	3.64e-53	-0.692799	0.301	0.432	1.22e-48	EC_2	Pparg
Akap12.1	4.09e-53	-0.987075	0.103	0.221	1.37e-48	EC_2	Akap12
Gnaq.1	9.47e-53	0.400609	0.72	0.604	3.17e-48	EC_2	Gnaq
Meox2.1	1.05e-52	0.561684	0.449	0.317	3.51e-48	EC_2	Meox2
Kras.1	1.76e-52	0.537107	0.321	0.204	5.87e-48	EC_2	Kras
Tead4	2.68e-52	0.517621	0.242	0.138	8.94e-48	EC_2	Tead4
Oxr1.1	3.05e-52	-0.500636	0.587	0.681	1.02e-47	EC_2	Oxr1
Epha4	4.63e-52	-0.767214	0.119	0.239	1.55e-47	EC_2	Epha4
Gjc1	8.76e-52	0.497995	0.171	0.085	2.93e-47	EC_2	Gjc1
Ablim1.1	1.44e-51	-0.422268	0.836	0.849	4.83e-47	EC_2	Ablim1
Prg4	1.74e-51	0.497121	0.113	0.047	5.81e-47	EC_2	Prg4
AU020206.1	5.41e-51	-0.715843	0.189	0.317	1.81e-46	EC_2	AU020206
Npr1	6.56e-51	0.476977	0.234	0.133	2.19e-46	EC_2	Npr1
Elk3	1.02e-50	0.395216	0.712	0.596	3.4e-46	EC_2	Elk3
Dcbld1.1	1.38e-50	-0.754949	0.142	0.264	4.61e-46	EC_2	Dcbld1
Tanc1	1.45e-50	-0.464958	0.59	0.683	4.85e-46	EC_2	Tanc1
Abcg2	2.31e-50	0.575345	0.391	0.272	7.71e-46	EC_2	Abcg2
Atp8b1.1	2.36e-50	0.531959	0.279	0.17	7.9e-46	EC_2	Atp8b1
Sybu.1	6.44e-50	-0.789498	0.172	0.294	2.15e-45	EC_2	Sybu
Fbln2.2	1.44e-49	0.532244	0.163	0.082	4.81e-45	EC_2	Fbln2
Dennd5b.1	2.49e-49	0.400799	0.651	0.527	8.33e-45	EC_2	Dennd5b
Arhgef3	2.77e-49	0.394574	0.7	0.585	9.26e-45	EC_2	Arhgef3
Nfat5.1	4.21e-49	0.380144	0.538	0.404	1.41e-44	EC_2	Nfat5
Col5a2.2	4.34e-49	0.455694	0.149	0.071	1.45e-44	EC_2	Col5a2
Car4.1	4.7e-49	-0.625614	0.025	0.11	1.57e-44	EC_2	Car4
Rsad2.1	8.59e-49	-0.767138	0.038	0.129	2.87e-44	EC_2	Rsad2
Cpe.1	1.25e-48	0.424268	0.126	0.056	4.18e-44	EC_2	Cpe
Arhgap28.1	1.55e-48	-0.670854	0.137	0.257	5.17e-44	EC_2	Arhgap28
Rapgef2.1	1.58e-48	-0.417167	0.677	0.748	5.27e-44	EC_2	Rapgef2
Acer3.2	1.61e-48	0.531744	0.198	0.108	5.4e-44	EC_2	Acer3
Afdn.1	2.32e-48	-0.480729	0.585	0.668	7.77e-44	EC_2	Afdn
Cdh13.1	4.64e-48	-0.554475	0.663	0.73	1.55e-43	EC_2	Cdh13
Mcc.1	1.16e-47	-0.570321	0.576	0.655	3.86e-43	EC_2	Mcc
Rnf220.1	1.68e-47	-0.858286	0.121	0.233	5.61e-43	EC_2	Rnf220
Gpihbp1.1	1.77e-47	-0.685555	0.222	0.345	5.92e-43	EC_2	Gpihbp1
Cd93.1	2.56e-47	-0.61602	0.241	0.361	8.54e-43	EC_2	Cd93
Zbtb20.1	5.61e-47	0.279415	0.921	0.858	1.88e-42	EC_2	Zbtb20
Rgcc.1	2.42e-46	-0.61167	0.241	0.366	8.08e-42	EC_2	Rgcc
Anxa2.1	1.41e-45	0.463434	0.209	0.118	4.72e-41	EC_2	Anxa2
Sipa1l2	1.51e-45	-0.712227	0.062	0.156	5.04e-41	EC_2	Sipa1l2
Fam171a1	2.43e-45	0.476275	0.417	0.297	8.11e-41	EC_2	Fam171a1
Mmp28	2.44e-45	0.458421	0.134	0.064	8.16e-41	EC_2	Mmp28
Nav3.1	6.45e-45	-0.641214	0.524	0.595	2.16e-40	EC_2	Nav3
Nr4a1.1	7.33e-45	-0.825448	0.077	0.176	2.45e-40	EC_2	Nr4a1
Cxcl12.2	7.82e-45	-0.935769	0.221	0.329	2.61e-40	EC_2	Cxcl12
Itpr2	8.19e-45	0.413572	0.567	0.447	2.74e-40	EC_2	Itpr2
Fam189a2.1	1.37e-44	0.442905	0.169	0.089	4.57e-40	EC_2	Fam189a2
Bace2.1	1.38e-44	0.288125	0.135	0.063	4.61e-40	EC_2	Bace2
Rere.1	1.56e-44	0.39315	0.631	0.514	5.21e-40	EC_2	Rere
Hpcal1	6.65e-44	0.446306	0.458	0.337	2.22e-39	EC_2	Hpcal1
Ric1.1	7.42e-44	-0.605566	0.206	0.323	2.48e-39	EC_2	Ric1
Gimap6.1	1.87e-43	-0.64837	0.242	0.362	6.25e-39	EC_2	Gimap6
Cyp4b1.1	3.59e-43	-0.575079	0.046	0.134	1.2e-38	EC_2	Cyp4b1
Zfp462	4.3e-43	0.501125	0.312	0.206	1.44e-38	EC_2	Zfp462
Atp2b1	4.69e-43	0.472587	0.427	0.312	1.57e-38	EC_2	Atp2b1
Smad1.1	5.43e-43	-0.624059	0.248	0.365	1.81e-38	EC_2	Smad1
Plekhg3	8.82e-43	0.43275	0.132	0.064	2.95e-38	EC_2	Plekhg3
Itpr1.1	9.32e-43	0.428523	0.546	0.428	3.12e-38	EC_2	Itpr1
Cdh23.1	1.29e-42	-0.618762	0.138	0.248	4.3e-38	EC_2	Cdh23
2610203C22Rik.1	1.35e-42	-0.717407	0.033	0.113	4.5e-38	EC_2	2610203C22Rik
Atp8b5	2.61e-42	0.446686	0.121	0.057	8.74e-38	EC_2	Atp8b5
Pdlim1	2.89e-42	0.414332	0.393	0.277	9.65e-38	EC_2	Pdlim1
Slco2b1	3.29e-42	-0.557802	0.032	0.113	1.1e-37	EC_2	Slco2b1
Traf5	3.39e-42	0.451578	0.145	0.074	1.13e-37	EC_2	Traf5
Galnt15.1	7.86e-42	-0.605274	0.115	0.218	2.63e-37	EC_2	Galnt15
2004-09-01	1.48e-41	-0.575682	0.052	0.14	4.95e-37	EC_2	45904
Pcdh19	3.46e-41	0.574707	0.212	0.124	1.16e-36	EC_2	Pcdh19
Podxl	5.8e-41	0.383054	0.528	0.406	1.94e-36	EC_2	Podxl
Plpp3.1	7.61e-41	-0.638186	0.461	0.55	2.54e-36	EC_2	Plpp3
Ccdc85a.1	1.02e-40	-0.437281	0.542	0.646	3.39e-36	EC_2	Ccdc85a
Atp2b4.2	1.14e-40	0.422654	0.3	0.197	3.82e-36	EC_2	Atp2b4
Apbb2.1	1.32e-40	-0.400017	0.825	0.826	4.4e-36	EC_2	Apbb2
Ica1	1.56e-40	0.381271	0.557	0.44	5.21e-36	EC_2	Ica1
Tsc22d3	4.94e-40	0.457358	0.136	0.068	1.65e-35	EC_2	Tsc22d3
Ttll7	5.34e-40	-0.567432	0.03	0.106	1.79e-35	EC_2	Ttll7
Cd247.1	8.99e-40	-0.683526	0.033	0.11	3e-35	EC_2	Cd247
Ahnak.1	4.51e-39	0.390032	0.447	0.331	1.51e-34	EC_2	Ahnak
Adgrf5	4.52e-39	0.26773	0.831	0.745	1.51e-34	EC_2	Adgrf5
Arhgap31	5.34e-39	-0.343619	0.784	0.818	1.78e-34	EC_2	Arhgap31
Ralgapa1.1	6.47e-39	-0.417639	0.565	0.646	2.16e-34	EC_2	Ralgapa1
Sgk1.1	6.5e-39	-0.648291	0.224	0.332	2.17e-34	EC_2	Sgk1
Epb41.1	6.96e-39	-0.586101	0.292	0.402	2.33e-34	EC_2	Epb41
Actg1.1	7.73e-39	-0.632951	0.059	0.145	2.58e-34	EC_2	Actg1
Vav3.1	8.79e-39	-0.529301	0.467	0.56	2.94e-34	EC_2	Vav3
4930402H24Rik.1	1.42e-38	-0.516938	0.311	0.425	4.75e-34	EC_2	4930402H24Rik
Bcl2.1	1.67e-38	-0.674653	0.174	0.28	5.59e-34	EC_2	Bcl2
Fli1	1.76e-38	0.253447	0.901	0.837	5.88e-34	EC_2	Fli1
Adamts1.1	1.79e-38	-0.811026	0.076	0.164	6e-34	EC_2	Adamts1
Smim14	2.21e-38	0.462384	0.197	0.115	7.4e-34	EC_2	Smim14
Etv6	4.41e-38	0.279179	0.65	0.529	1.47e-33	EC_2	Etv6
Gbe1	7.54e-38	0.440687	0.214	0.128	2.52e-33	EC_2	Gbe1
S100a10.1	8.08e-38	0.479988	0.142	0.076	2.7e-33	EC_2	S100a10
Eml1	1.5e-37	-0.664682	0.109	0.204	5.01e-33	EC_2	Eml1
Myzap	1.82e-37	0.449315	0.141	0.073	6.09e-33	EC_2	Myzap
Arhgap17	3.54e-37	0.418673	0.355	0.251	1.18e-32	EC_2	Arhgap17
Fbxl7.1	9.82e-37	-0.45716	0.654	0.728	3.28e-32	EC_2	Fbxl7
Cdc42ep3.1	1.21e-36	-0.581484	0.099	0.192	4.05e-32	EC_2	Cdc42ep3
Inpp4a	2.06e-36	0.419923	0.217	0.133	6.9e-32	EC_2	Inpp4a
Rasgrp3.1	4.08e-36	-0.47285	0.492	0.575	1.36e-31	EC_2	Rasgrp3
Smad6.2	5.97e-36	-0.786327	0.058	0.137	2e-31	EC_2	Smad6
Tspan9	6.38e-36	0.342518	0.581	0.47	2.13e-31	EC_2	Tspan9
Ahdc1	1.01e-35	0.4205	0.184	0.107	3.39e-31	EC_2	Ahdc1
Bcl6b.1	1.1e-35	-0.580438	0.172	0.273	3.67e-31	EC_2	Bcl6b
Ldlrad3.1	1.2e-35	-0.564421	0.161	0.262	4.01e-31	EC_2	Ldlrad3
Adgrl4.1	1.33e-35	0.305586	0.849	0.766	4.44e-31	EC_2	Adgrl4
Cdk14	1.58e-35	0.383038	0.338	0.235	5.27e-31	EC_2	Cdk14
Mertk	1.73e-35	-0.544007	0.124	0.22	5.78e-31	EC_2	Mertk
Slco3a1.2	1.87e-35	0.371412	0.277	0.181	6.25e-31	EC_2	Slco3a1
Rps6ka2.2	1.92e-35	-0.891859	0.139	0.234	6.41e-31	EC_2	Rps6ka2
Ets2.1	2.09e-35	-0.576609	0.179	0.279	6.98e-31	EC_2	Ets2
Sept11.2	4.02e-35	0.416954	0.266	0.175	1.34e-30	EC_2	Sept11
Unc13b.2	5.18e-35	0.335571	0.509	0.393	1.73e-30	EC_2	Unc13b
Arhgef12.1	9.17e-35	-0.417494	0.541	0.623	3.06e-30	EC_2	Arhgef12
Ptpn14.2	9.44e-35	0.323861	0.343	0.238	3.15e-30	EC_2	Ptpn14
Adam19.1	1.11e-34	-0.610769	0.076	0.16	3.69e-30	EC_2	Adam19
Hacd4	1.13e-34	0.418105	0.14	0.075	3.78e-30	EC_2	Hacd4
Spred2.1	1.15e-34	-0.529281	0.359	0.457	3.85e-30	EC_2	Spred2
BC052040	2.74e-34	0.422388	0.111	0.055	9.16e-30	EC_2	BC052040
Tm4sf1.1	2.79e-34	-0.601071	0.161	0.26	9.32e-30	EC_2	Tm4sf1
Cdh5.1	2.82e-34	-0.473771	0.434	0.523	9.43e-30	EC_2	Cdh5
Tspan5.2	3e-34	0.529013	0.27	0.182	1e-29	EC_2	Tspan5
Fas	4.5e-34	0.384513	0.225	0.141	1.5e-29	EC_2	Fas
Actb.1	6.83e-34	-0.629555	0.264	0.362	2.28e-29	EC_2	Actb
Clec2d.1	8.16e-34	-0.487647	0.112	0.206	2.73e-29	EC_2	Clec2d
Myh9.1	8.7e-34	-0.51299	0.345	0.443	2.91e-29	EC_2	Myh9
Eva1a	9.57e-34	-0.513668	0.06	0.139	3.2e-29	EC_2	Eva1a
Pbx1.2	1.13e-33	0.390549	0.425	0.318	3.79e-29	EC_2	Pbx1
Emcn	2.03e-33	0.300467	0.704	0.601	6.78e-29	EC_2	Emcn
Tns2	4.2e-33	0.424615	0.211	0.132	1.4e-28	EC_2	Tns2
Abi3	5.21e-33	0.376932	0.229	0.145	1.74e-28	EC_2	Abi3
Nek7	6.33e-33	0.413896	0.394	0.294	2.12e-28	EC_2	Nek7
Aopep.1	6.51e-33	0.449026	0.401	0.301	2.17e-28	EC_2	Aopep
Adamts6	1.55e-32	0.423984	0.11	0.055	5.19e-28	EC_2	Adamts6
Dach1.1	2.03e-32	-0.4732	0.688	0.718	6.78e-28	EC_2	Dach1
Ogt.2	2.18e-32	0.390888	0.361	0.263	7.29e-28	EC_2	Ogt
Klf7	2.74e-32	0.27459	0.717	0.621	9.17e-28	EC_2	Klf7
Slc25a25.1	2.84e-32	-0.636606	0.082	0.162	9.49e-28	EC_2	Slc25a25
Arhgef10	3.01e-32	0.385944	0.244	0.16	1.01e-27	EC_2	Arhgef10
Cd38.1	4.22e-32	-0.549411	0.137	0.228	1.41e-27	EC_2	Cd38
Btg2.1	4.44e-32	-0.57074	0.174	0.271	1.48e-27	EC_2	Btg2
Spns2	4.67e-32	0.395619	0.178	0.106	1.56e-27	EC_2	Spns2
Nes.1	1.98e-31	-0.48279	0.042	0.109	6.63e-27	EC_2	Nes
Myh6.2	2.48e-31	-1.13501	0.059	0.132	8.27e-27	EC_2	Myh6
Nfia.2	8.51e-31	0.262785	0.754	0.663	2.84e-26	EC_2	Nfia
Airn	1.55e-30	0.269886	0.623	0.513	5.18e-26	EC_2	Airn
Btbd9	1.66e-30	0.350846	0.507	0.407	5.54e-26	EC_2	Btbd9
Galnt1.1	1.97e-30	-0.529163	0.173	0.266	6.58e-26	EC_2	Galnt1
Emp1	2.57e-30	0.349201	0.108	0.055	8.58e-26	EC_2	Emp1
Mcam.1	3.27e-30	-0.499897	0.046	0.113	1.09e-25	EC_2	Mcam
Mir100hg	3.93e-30	0.439559	0.107	0.055	1.31e-25	EC_2	Mir100hg
Icam1	4e-30	0.403624	0.102	0.051	1.34e-25	EC_2	Icam1
Gab1	4.66e-30	0.408744	0.278	0.192	1.56e-25	EC_2	Gab1
Nmt2.1	4.83e-30	0.389766	0.176	0.107	1.62e-25	EC_2	Nmt2
Rin2	7.21e-30	-0.434807	0.143	0.237	2.41e-25	EC_2	Rin2
Ephb1.1	8.2e-30	-0.557496	0.133	0.219	2.74e-25	EC_2	Ephb1
Pde8a	1.06e-29	0.343929	0.379	0.282	3.55e-25	EC_2	Pde8a
Nus1.1	1.3e-29	-0.533564	0.082	0.159	4.33e-25	EC_2	Nus1
Zfp710.1	1.36e-29	-0.540734	0.217	0.311	4.54e-25	EC_2	Zfp710
Il6st.2	1.69e-29	0.448178	0.235	0.157	5.64e-25	EC_2	Il6st
Oaz2	1.9e-29	-0.434288	0.047	0.115	6.34e-25	EC_2	Oaz2
Prickle1.1	6.25e-29	0.497058	0.193	0.123	2.09e-24	EC_2	Prickle1
Fgd5	9.84e-29	0.29748	0.626	0.535	3.29e-24	EC_2	Fgd5
Aldh2	1.97e-28	0.383085	0.136	0.078	6.6e-24	EC_2	Aldh2
Prkce.1	2.58e-28	-0.400285	0.496	0.579	8.62e-24	EC_2	Prkce
Nxn.2	3.81e-28	0.275154	0.587	0.482	1.27e-23	EC_2	Nxn
Nos3	4.1e-28	0.355944	0.388	0.297	1.37e-23	EC_2	Nos3
Pde7b.2	4.35e-28	-0.815099	0.085	0.159	1.45e-23	EC_2	Pde7b
Sh3bgrl	4.63e-28	0.338899	0.332	0.243	1.55e-23	EC_2	Sh3bgrl
Rapgef1.1	9.95e-28	-0.371721	0.634	0.682	3.33e-23	EC_2	Rapgef1
Tnfrsf21.1	1.01e-27	-0.52401	0.052	0.118	3.39e-23	EC_2	Tnfrsf21
Ntf3	1.29e-27	0.315555	0.335	0.242	4.31e-23	EC_2	Ntf3
Dgkh.1	1.57e-27	-0.397624	0.496	0.569	5.24e-23	EC_2	Dgkh
Dusp3.1	1.71e-27	-0.450759	0.191	0.282	5.72e-23	EC_2	Dusp3
Etl4.1	3.43e-27	-0.314027	0.846	0.842	1.15e-22	EC_2	Etl4
Trio	5.14e-27	-0.394566	0.466	0.544	1.72e-22	EC_2	Trio
Iigp1	5.38e-27	0.546462	0.269	0.189	1.8e-22	EC_2	Iigp1
Calm1.2	5.79e-27	-0.512802	0.144	0.226	1.94e-22	EC_2	Calm1
March3.2	6.09e-27	0.317305	0.214	0.139	2.04e-22	EC_2	March3
Git2	7.24e-27	-0.434417	0.268	0.36	2.42e-22	EC_2	Git2
Cecr2.1	7.59e-27	-0.507986	0.152	0.237	2.54e-22	EC_2	Cecr2
Sik1.1	7.62e-27	-0.564915	0.143	0.224	2.55e-22	EC_2	Sik1
Cbfa2t3	9.09e-27	0.362322	0.312	0.226	3.04e-22	EC_2	Cbfa2t3
Gstt2.1	1.35e-26	-0.451086	0.064	0.132	4.52e-22	EC_2	Gstt2
Mbnl1.1	1.81e-26	0.301693	0.596	0.511	6.06e-22	EC_2	Mbnl1
Ndrg1	2.25e-26	0.336013	0.205	0.134	7.51e-22	EC_2	Ndrg1
Igf1r	2.45e-26	-0.434548	0.384	0.472	8.2e-22	EC_2	Igf1r
Plxnd1.1	3.71e-26	-0.469029	0.299	0.384	1.24e-21	EC_2	Plxnd1
Tnrc6c	7.23e-26	0.328828	0.493	0.398	2.42e-21	EC_2	Tnrc6c
Tnfaip1.1	8.01e-26	-0.46398	0.124	0.203	2.68e-21	EC_2	Tnfaip1
Pcdh1.1	8.63e-26	-0.409635	0.056	0.119	2.88e-21	EC_2	Pcdh1
Man1c1	9.92e-26	0.351865	0.224	0.15	3.32e-21	EC_2	Man1c1
Stk39	1.08e-25	0.350392	0.127	0.072	3.61e-21	EC_2	Stk39
Tpt1.1	1.19e-25	-0.516787	0.136	0.215	3.98e-21	EC_2	Tpt1
Mast4.1	1.38e-25	-0.528339	0.462	0.532	4.61e-21	EC_2	Mast4
Srgap1.1	1.98e-25	-0.460664	0.187	0.274	6.62e-21	EC_2	Srgap1
Jam2	1.99e-25	0.294132	0.537	0.442	6.67e-21	EC_2	Jam2
Glce	2.33e-25	0.401225	0.161	0.1	7.8e-21	EC_2	Glce
Zfhx3	2.53e-25	0.385239	0.306	0.224	8.45e-21	EC_2	Zfhx3
Rnf130	2.64e-25	0.348404	0.268	0.19	8.82e-21	EC_2	Rnf130
Arhgap29.1	2.72e-25	-0.381524	0.48	0.553	9.09e-21	EC_2	Arhgap29
Klc1	3.17e-25	0.319198	0.27	0.19	1.06e-20	EC_2	Klc1
Mtmr10	3.47e-25	-0.467558	0.048	0.108	1.16e-20	EC_2	Mtmr10
Sdc3.1	3.66e-25	-0.414073	0.058	0.122	1.22e-20	EC_2	Sdc3
Als2cl	4.79e-25	0.31636	0.206	0.135	1.6e-20	EC_2	Als2cl
Cd81.1	5.17e-25	-0.495256	0.134	0.212	1.73e-20	EC_2	Cd81
Cmip	5.47e-25	0.273326	0.565	0.468	1.83e-20	EC_2	Cmip
Plec	5.72e-25	0.312829	0.116	0.065	1.91e-20	EC_2	Plec
Ap3s1	5.98e-25	0.356984	0.173	0.11	2e-20	EC_2	Ap3s1
Mbnl2.1	9.38e-25	0.291099	0.669	0.595	3.13e-20	EC_2	Mbnl2
Asah2	1.18e-24	0.363424	0.254	0.177	3.95e-20	EC_2	Asah2
Rundc3b.1	1.21e-24	0.349373	0.261	0.183	4.04e-20	EC_2	Rundc3b
Rnf144a.1	1.67e-24	-0.47226	0.223	0.307	5.58e-20	EC_2	Rnf144a
Parva.1	2.27e-24	0.365182	0.334	0.254	7.6e-20	EC_2	Parva
Nck2.1	2.68e-24	-0.408564	0.232	0.32	8.97e-20	EC_2	Nck2
Csf1	2.69e-24	0.324971	0.149	0.09	8.99e-20	EC_2	Csf1
Papss2.1	3.14e-24	-0.503947	0.128	0.204	1.05e-19	EC_2	Papss2
Myl2.2	4.95e-24	-0.664336	0.149	0.227	1.65e-19	EC_2	Myl2
Chn2.1	5.4e-24	0.326148	0.273	0.193	1.81e-19	EC_2	Chn2
Sult1a1	7.45e-24	-0.356329	0.053	0.114	2.49e-19	EC_2	Sult1a1
Pls3.1	7.65e-24	-0.533938	0.268	0.349	2.56e-19	EC_2	Pls3
Bcar3	9.87e-24	-0.391665	0.046	0.103	3.3e-19	EC_2	Bcar3
Pam.2	9.91e-24	0.29766	0.393	0.306	3.31e-19	EC_2	Pam
Gm37240.1	1.39e-23	0.361208	0.262	0.188	4.64e-19	EC_2	Gm37240
Klhl5	1.43e-23	0.354083	0.289	0.212	4.77e-19	EC_2	Klhl5
Il17rd	1.94e-23	0.35549	0.157	0.098	6.5e-19	EC_2	Il17rd
B4galt4	2.3e-23	-0.423972	0.065	0.127	7.67e-19	EC_2	B4galt4
Lama4.1	2.39e-23	-0.4026	0.495	0.559	7.97e-19	EC_2	Lama4
Tmod3.1	3.07e-23	0.291001	0.495	0.408	1.03e-18	EC_2	Tmod3
Ptp4a3.1	3.42e-23	-0.382075	0.058	0.119	1.14e-18	EC_2	Ptp4a3
Phlpp1.1	3.53e-23	0.255677	0.653	0.564	1.18e-18	EC_2	Phlpp1
Peli1.1	4.37e-23	0.374463	0.286	0.211	1.46e-18	EC_2	Peli1
Ypel2	4.45e-23	0.34735	0.228	0.159	1.49e-18	EC_2	Ypel2
Tacc2.1	4.73e-23	0.305695	0.142	0.086	1.58e-18	EC_2	Tacc2
Ier2.1	6.52e-23	-0.469955	0.121	0.194	2.18e-18	EC_2	Ier2
Mamld1	8.1e-23	0.297153	0.103	0.057	2.71e-18	EC_2	Mamld1
Sh3bgrl2	8.48e-23	0.32342	0.142	0.087	2.83e-18	EC_2	Sh3bgrl2
H2-T24	1.09e-22	0.264648	0.118	0.068	3.65e-18	EC_2	H2-T24
Nhs	1.23e-22	0.397746	0.189	0.125	4.13e-18	EC_2	Nhs
Dleu2.1	1.25e-22	0.313391	0.476	0.383	4.19e-18	EC_2	Dleu2
Gm44148	1.38e-22	0.400197	0.167	0.108	4.6e-18	EC_2	Gm44148
4930517O19Rik	1.51e-22	0.344224	0.125	0.074	5.06e-18	EC_2	4930517O19Rik
Ephx1.2	1.7e-22	0.32748	0.155	0.098	5.67e-18	EC_2	Ephx1
Cmtm8.1	1.72e-22	-0.452432	0.119	0.19	5.74e-18	EC_2	Cmtm8
Col4a3bp.1	1.8e-22	0.349855	0.312	0.237	6.01e-18	EC_2	Col4a3bp
Id1.2	2.14e-22	-0.425369	0.227	0.313	7.15e-18	EC_2	Id1
Susd6	2.54e-22	-0.390463	0.366	0.447	8.5e-18	EC_2	Susd6
Psd3.1	2.87e-22	-0.342638	0.575	0.631	9.59e-18	EC_2	Psd3
Zyx	2.94e-22	-0.385829	0.057	0.115	9.83e-18	EC_2	Zyx
Thbd.1	3.42e-22	0.341861	0.165	0.106	1.14e-17	EC_2	Thbd
Sox17	3.73e-22	-0.437847	0.049	0.104	1.25e-17	EC_2	Sox17
Scarb1.1	5.02e-22	-0.444875	0.155	0.229	1.68e-17	EC_2	Scarb1
Dipk2b	5.35e-22	0.312291	0.289	0.21	1.79e-17	EC_2	Dipk2b
Mical3.1	6.22e-22	0.293717	0.227	0.157	2.08e-17	EC_2	Mical3
Nhsl2.2	6.93e-22	0.258574	0.232	0.162	2.32e-17	EC_2	Nhsl2
Mmp15	1.09e-21	-0.38262	0.059	0.118	3.64e-17	EC_2	Mmp15
Vwa3a.1	1.19e-21	-0.43002	0.151	0.227	3.97e-17	EC_2	Vwa3a
Wwox.1	1.21e-21	0.376358	0.391	0.311	4.05e-17	EC_2	Wwox
Gse1	1.85e-21	0.468973	0.217	0.151	6.17e-17	EC_2	Gse1
Shroom4	1.99e-21	0.273341	0.473	0.388	6.65e-17	EC_2	Shroom4
Egln1	2.2e-21	0.325951	0.278	0.204	7.37e-17	EC_2	Egln1
Nin.1	2.43e-21	-0.397198	0.1	0.166	8.13e-17	EC_2	Nin
Arglu1	2.44e-21	-0.36465	0.37	0.453	8.16e-17	EC_2	Arglu1
Auts2.1	2.7e-21	-0.417694	0.449	0.517	9.02e-17	EC_2	Auts2
Acyp2.1	3.16e-21	0.361763	0.161	0.103	1.06e-16	EC_2	Acyp2
Aqp7.1	4.5e-21	-0.415965	0.097	0.162	1.5e-16	EC_2	Aqp7
Piezo1	4.57e-21	0.302942	0.32	0.244	1.53e-16	EC_2	Piezo1
Gch1	4.74e-21	0.271443	0.134	0.082	1.58e-16	EC_2	Gch1
Sh3d19	5.54e-21	0.314082	0.25	0.179	1.85e-16	EC_2	Sh3d19
Sox18.2	6.37e-21	-0.368217	0.051	0.105	2.13e-16	EC_2	Sox18
Abcb1a	7.83e-21	0.294505	0.286	0.211	2.62e-16	EC_2	Abcb1a
Ldb2.1	9.5e-21	-0.398364	0.596	0.646	3.17e-16	EC_2	Ldb2
Ndst1	1.12e-20	0.280645	0.1	0.057	3.76e-16	EC_2	Ndst1
Pced1b.1	1.49e-20	0.33184	0.296	0.222	4.98e-16	EC_2	Pced1b
Prkcg.1	2.57e-20	-0.522441	0.142	0.21	8.58e-16	EC_2	Prkcg
St3gal5.1	2.75e-20	-0.380171	0.051	0.105	9.19e-16	EC_2	St3gal5
Adgrg1.1	3e-20	-0.41505	0.123	0.191	1e-15	EC_2	Adgrg1
Sh3pxd2a	3.35e-20	0.292629	0.391	0.312	1.12e-15	EC_2	Sh3pxd2a
Plscr4	4.44e-20	0.251511	0.42	0.335	1.48e-15	EC_2	Plscr4
Uhrf2	5.8e-20	0.295054	0.317	0.242	1.94e-15	EC_2	Uhrf2
Ano6	5.95e-20	0.27975	0.46	0.382	1.99e-15	EC_2	Ano6
Slc38a2	6.35e-20	0.34683	0.234	0.167	2.12e-15	EC_2	Slc38a2
Map4k5.1	6.86e-20	-0.413476	0.216	0.29	2.29e-15	EC_2	Map4k5
Far1	6.86e-20	0.347944	0.169	0.113	2.29e-15	EC_2	Far1
Cuedc1	7.08e-20	0.281974	0.328	0.252	2.37e-15	EC_2	Cuedc1
2009-09-01	7.38e-20	0.2955	0.252	0.184	2.47e-15	EC_2	45909
Adam15	1.06e-19	0.328505	0.266	0.198	3.55e-15	EC_2	Adam15
Ceacam1	1.2e-19	0.253133	0.142	0.09	4.03e-15	EC_2	Ceacam1
Ppp2r5e	1.39e-19	0.310272	0.365	0.291	4.66e-15	EC_2	Ppp2r5e
Lpar6.1	1.66e-19	-0.367118	0.071	0.128	5.56e-15	EC_2	Lpar6
Mcu.1	1.92e-19	0.276523	0.357	0.28	6.41e-15	EC_2	Mcu
Sptlc2.1	2.35e-19	0.288251	0.334	0.26	7.84e-15	EC_2	Sptlc2
Sos1	2.72e-19	-0.416275	0.125	0.191	9.07e-15	EC_2	Sos1
Phactr2.1	2.83e-19	0.319833	0.278	0.208	9.47e-15	EC_2	Phactr2
Acvrl1	3.14e-19	0.272023	0.165	0.109	1.05e-14	EC_2	Acvrl1
Ly6a.2	3.3e-19	0.274931	0.264	0.193	1.1e-14	EC_2	Ly6a
Zfp704	3.37e-19	0.274316	0.272	0.2	1.13e-14	EC_2	Zfp704
Lifr.2	4e-19	0.375728	0.216	0.155	1.34e-14	EC_2	Lifr
Ecm2	4.08e-19	0.344036	0.179	0.122	1.36e-14	EC_2	Ecm2
Pik3r3	4.14e-19	-0.583463	0.132	0.196	1.38e-14	EC_2	Pik3r3
Ankrd44.1	4.49e-19	-0.359309	0.377	0.453	1.5e-14	EC_2	Ankrd44
Hif1a	4.99e-19	0.33404	0.116	0.071	1.67e-14	EC_2	Hif1a
Camk2d.1	5.42e-19	0.32289	0.392	0.316	1.81e-14	EC_2	Camk2d
Tmcc3	6.11e-19	-0.378364	0.519	0.57	2.04e-14	EC_2	Tmcc3
Esam.1	6.14e-19	-0.385071	0.289	0.362	2.05e-14	EC_2	Esam
Tbc1d22a	7.84e-19	-0.408706	0.245	0.316	2.62e-14	EC_2	Tbc1d22a
Prag1.1	7.93e-19	-0.432829	0.143	0.209	2.65e-14	EC_2	Prag1
Dapk2	7.98e-19	-0.492252	0.066	0.119	2.67e-14	EC_2	Dapk2
Mfhas1.1	9.48e-19	-0.392535	0.184	0.256	3.17e-14	EC_2	Mfhas1
Fbxw7	9.93e-19	0.300687	0.277	0.208	3.32e-14	EC_2	Fbxw7
Mpzl1	1.08e-18	-0.410866	0.124	0.188	3.63e-14	EC_2	Mpzl1
Pard3bos1.2	1.24e-18	0.311319	0.132	0.084	4.15e-14	EC_2	Pard3bos1
Jup.1	1.85e-18	-0.361844	0.132	0.199	6.18e-14	EC_2	Jup
Notch1	1.9e-18	-0.372059	0.189	0.259	6.35e-14	EC_2	Notch1
Rasgrp2	2.24e-18	-0.3632	0.136	0.202	7.49e-14	EC_2	Rasgrp2
Agpat4	2.51e-18	0.281778	0.127	0.08	8.39e-14	EC_2	Agpat4
Nfix.1	2.99e-18	0.277629	0.198	0.139	9.98e-14	EC_2	Nfix
3110082I17Rik	4.97e-18	0.312212	0.167	0.114	1.66e-13	EC_2	3110082I17Rik
Tnfaip8	5.39e-18	0.305538	0.234	0.17	1.8e-13	EC_2	Tnfaip8
Ptma.2	6.39e-18	-0.418964	0.199	0.268	2.13e-13	EC_2	Ptma
Mtm1	6.89e-18	0.263876	0.104	0.062	2.3e-13	EC_2	Mtm1
Fam222b	7.01e-18	0.282493	0.296	0.228	2.34e-13	EC_2	Fam222b
Adcy4	8.13e-18	0.268739	0.216	0.155	2.72e-13	EC_2	Adcy4
Plod2	1.12e-17	0.272796	0.131	0.084	3.73e-13	EC_2	Plod2
Gna12	1.18e-17	-0.3479	0.089	0.147	3.95e-13	EC_2	Gna12
Tns1	1.2e-17	-0.329564	0.469	0.531	4.02e-13	EC_2	Tns1
H3f3b.1	1.24e-17	-0.37886	0.176	0.246	4.16e-13	EC_2	H3f3b
Slc44a2	1.26e-17	-0.353428	0.063	0.114	4.22e-13	EC_2	Slc44a2
Itsn1.2	1.34e-17	0.254283	0.125	0.079	4.47e-13	EC_2	Itsn1
Serinc3	1.36e-17	-0.351118	0.303	0.375	4.53e-13	EC_2	Serinc3
Ldlrad4.2	1.89e-17	0.255864	0.457	0.379	6.32e-13	EC_2	Ldlrad4
Myo1e.1	2.23e-17	-0.40853	0.425	0.485	7.44e-13	EC_2	Myo1e
Spry4	2.5e-17	-0.405108	0.058	0.106	8.36e-13	EC_2	Spry4
Cast	2.68e-17	0.268038	0.302	0.233	8.97e-13	EC_2	Cast
Gda.1	2.86e-17	-0.343744	0.081	0.136	9.55e-13	EC_2	Gda
Tcf3	4.5e-17	-0.314436	0.057	0.105	1.5e-12	EC_2	Tcf3
Atp13a3.2	5.11e-17	-0.532219	0.085	0.138	1.71e-12	EC_2	Atp13a3
Zfp36.1	6.4e-17	-0.425507	0.085	0.138	2.14e-12	EC_2	Zfp36
Fam78b.1	6.85e-17	-0.431216	0.167	0.23	2.29e-12	EC_2	Fam78b
Crem	7.81e-17	-0.375746	0.065	0.115	2.61e-12	EC_2	Crem
Ppm1h.1	8.09e-17	-0.347183	0.346	0.415	2.7e-12	EC_2	Ppm1h
Fndc3b.2	9.42e-17	0.266826	0.327	0.257	3.15e-12	EC_2	Fndc3b
Lamc1.1	1.22e-16	-0.40892	0.243	0.309	4.06e-12	EC_2	Lamc1
Fam43a.1	1.23e-16	-0.329137	0.093	0.149	4.11e-12	EC_2	Fam43a
Xrcc4	1.38e-16	0.320674	0.227	0.167	4.6e-12	EC_2	Xrcc4
Parvb	1.97e-16	0.251198	0.248	0.185	6.59e-12	EC_2	Parvb
Bst2.1	2.46e-16	-0.28586	0.053	0.1	8.22e-12	EC_2	Bst2
Cdc42ep1.1	2.46e-16	-0.316467	0.08	0.133	8.22e-12	EC_2	Cdc42ep1
Gas6	3.36e-16	0.289822	0.229	0.171	1.12e-11	EC_2	Gas6
Notch4	3.61e-16	-0.382265	0.129	0.187	1.21e-11	EC_2	Notch4
Fam20a	4.07e-16	0.261315	0.104	0.064	1.36e-11	EC_2	Fam20a
Gbp4	4.81e-16	0.325372	0.164	0.113	1.61e-11	EC_2	Gbp4
Timp4.1	6.35e-16	0.321354	0.162	0.112	2.12e-11	EC_2	Timp4
Mgll.1	6.61e-16	-0.387949	0.613	0.628	2.21e-11	EC_2	Mgll
Mcf2l.1	8.94e-16	-0.362075	0.459	0.508	2.99e-11	EC_2	Mcf2l
Map4k2.1	9.3e-16	-0.338247	0.153	0.215	3.11e-11	EC_2	Map4k2
Rbm28	9.34e-16	0.260878	0.125	0.081	3.12e-11	EC_2	Rbm28
Smco4.1	9.34e-16	-0.395019	0.171	0.231	3.12e-11	EC_2	Smco4
Fut8	9.61e-16	-0.428348	0.197	0.259	3.21e-11	EC_2	Fut8
Mfsd6	1.13e-15	0.260201	0.16	0.11	3.78e-11	EC_2	Mfsd6
P4ha1	1.14e-15	0.299139	0.144	0.098	3.81e-11	EC_2	P4ha1
Resf1	1.14e-15	0.260041	0.108	0.068	3.82e-11	EC_2	Resf1
AY036118.2	2.07e-15	-0.304314	0.68	0.755	6.93e-11	EC_2	AY036118
Chd7.1	2.12e-15	-0.356427	0.192	0.257	7.09e-11	EC_2	Chd7
Tspan12	3.37e-15	0.284626	0.252	0.193	1.13e-10	EC_2	Tspan12
Diaph1	3.71e-15	0.261927	0.229	0.17	1.24e-10	EC_2	Diaph1
Pik3r1	3.82e-15	0.286815	0.179	0.128	1.28e-10	EC_2	Pik3r1
Hspa8	3.9e-15	-0.350966	0.101	0.154	1.3e-10	EC_2	Hspa8
Mpdz	4.45e-15	0.277286	0.261	0.2	1.49e-10	EC_2	Mpdz
Afg1l	5.26e-15	0.301114	0.259	0.2	1.76e-10	EC_2	Afg1l
Smyd3	5.38e-15	0.25355	0.369	0.299	1.8e-10	EC_2	Smyd3
Cblb.1	6.1e-15	-0.351817	0.193	0.255	2.04e-10	EC_2	Cblb
Arpc2	6.95e-15	-0.315269	0.256	0.32	2.32e-10	EC_2	Arpc2
Cdk17.1	7.38e-15	-0.301267	0.492	0.548	2.47e-10	EC_2	Cdk17
Cept1	7.58e-15	0.268807	0.224	0.168	2.53e-10	EC_2	Cept1
Cyfip1	7.89e-15	0.279387	0.309	0.246	2.64e-10	EC_2	Cyfip1
Myl3.2	8.15e-15	-0.475548	0.214	0.276	2.72e-10	EC_2	Myl3
Fam129a	8.16e-15	0.322882	0.126	0.084	2.73e-10	EC_2	Fam129a
Ahr	9.73e-15	0.272506	0.172	0.123	3.25e-10	EC_2	Ahr
Litaf	1.02e-14	-0.422783	0.12	0.174	3.39e-10	EC_2	Litaf
Zfyve9	1.14e-14	0.261275	0.284	0.223	3.8e-10	EC_2	Zfyve9
2210408I21Rik	1.38e-14	0.342516	0.188	0.137	4.61e-10	EC_2	2210408I21Rik
Arhgef7.1	1.46e-14	-0.377906	0.156	0.213	4.88e-10	EC_2	Arhgef7
Mb.2	1.55e-14	-0.457372	0.181	0.241	5.17e-10	EC_2	Mb
Actr3.1	1.67e-14	-0.368684	0.197	0.258	5.58e-10	EC_2	Actr3
Ttc7b.1	1.96e-14	-0.296173	0.386	0.444	6.54e-10	EC_2	Ttc7b
Casp8	2.03e-14	-0.36112	0.122	0.175	6.77e-10	EC_2	Casp8
Spata6	2.38e-14	0.2791	0.318	0.258	7.95e-10	EC_2	Spata6
Pik3c2a.1	2.38e-14	-0.325668	0.28	0.346	7.96e-10	EC_2	Pik3c2a
Gimap8	2.4e-14	-0.312491	0.144	0.202	8.02e-10	EC_2	Gimap8
Wbp1l.2	2.44e-14	0.298146	0.192	0.141	8.16e-10	EC_2	Wbp1l
Plcb1.1	2.77e-14	-0.261682	0.805	0.813	9.24e-10	EC_2	Plcb1
Btbd3	3.56e-14	0.274731	0.143	0.1	1.19e-09	EC_2	Btbd3
Arl5b.1	3.66e-14	-0.342617	0.124	0.179	1.22e-09	EC_2	Arl5b
Gm46367.1	4.63e-14	0.270209	0.128	0.086	1.55e-09	EC_2	Gm46367
Azin1.2	5.87e-14	-0.462049	0.072	0.117	1.96e-09	EC_2	Azin1
Eif1	6.36e-14	-0.342978	0.119	0.173	2.13e-09	EC_2	Eif1
Mef2a.1	6.69e-14	-0.259112	0.492	0.554	2.24e-09	EC_2	Mef2a
Il15	7.63e-14	0.256917	0.237	0.183	2.55e-09	EC_2	Il15
Nrros.1	7.88e-14	-0.316288	0.076	0.122	2.63e-09	EC_2	Nrros
Slc9a1	8.71e-14	0.263712	0.163	0.116	2.91e-09	EC_2	Slc9a1
Vps13c	1.06e-13	0.27145	0.271	0.213	3.56e-09	EC_2	Vps13c
Ttc3	1.09e-13	0.25697	0.319	0.256	3.65e-09	EC_2	Ttc3
Osbpl10	1.14e-13	0.253816	0.161	0.115	3.8e-09	EC_2	Osbpl10
Ubb.1	1.2e-13	-0.311229	0.084	0.132	4.02e-09	EC_2	Ubb
Rnf125.1	1.28e-13	-0.361699	0.098	0.147	4.28e-09	EC_2	Rnf125
Cgnl1.2	1.57e-13	-0.728769	0.153	0.204	5.24e-09	EC_2	Cgnl1
Eef2	1.59e-13	-0.345188	0.099	0.148	5.31e-09	EC_2	Eef2
Cdc42bpa	1.66e-13	-0.289328	0.43	0.486	5.54e-09	EC_2	Cdc42bpa
Myl12a	1.77e-13	-0.314337	0.087	0.135	5.92e-09	EC_2	Myl12a
Tnni3.2	1.88e-13	-0.494298	0.177	0.233	6.3e-09	EC_2	Tnni3
mt-Atp6.2	2.09e-13	0.396812	0.251	0.195	6.98e-09	EC_2	mt-Atp6
Rpl19.1	2.32e-13	-0.264048	0.078	0.124	7.74e-09	EC_2	Rpl19
Gnas.1	2.37e-13	-0.317604	0.342	0.399	7.93e-09	EC_2	Gnas
Hivep3	2.48e-13	0.274968	0.229	0.176	8.27e-09	EC_2	Hivep3
Rpl37	3.7e-13	-0.320535	0.062	0.104	1.24e-08	EC_2	Rpl37
Map4k4	4.04e-13	-0.314077	0.361	0.414	1.35e-08	EC_2	Map4k4
Nedd9.1	4.29e-13	-0.318278	0.472	0.525	1.43e-08	EC_2	Nedd9
Pxdn.1	5.36e-13	-0.349247	0.193	0.249	1.79e-08	EC_2	Pxdn
Rgs3.2	6.71e-13	-0.368945	0.274	0.329	2.24e-08	EC_2	Rgs3
Fam120c	6.8e-13	0.251706	0.15	0.107	2.27e-08	EC_2	Fam120c
Ube2h	8.87e-13	-0.336384	0.299	0.355	2.96e-08	EC_2	Ube2h
Samd4.1	1.14e-12	-0.380088	0.096	0.143	3.81e-08	EC_2	Samd4
Kitl.1	1.2e-12	-0.358995	0.687	0.691	4.02e-08	EC_2	Kitl
Sipa1	1.33e-12	-0.285672	0.067	0.109	4.46e-08	EC_2	Sipa1
D830026I12Rik	1.45e-12	0.263743	0.166	0.121	4.83e-08	EC_2	D830026I12Rik
Timp3.1	1.53e-12	-0.343494	0.414	0.47	5.1e-08	EC_2	Timp3
Stx3	2.2e-12	0.253538	0.167	0.123	7.37e-08	EC_2	Stx3
Rpl41	2.38e-12	-0.34	0.109	0.158	7.94e-08	EC_2	Rpl41
Tpm4.1	3.06e-12	-0.300613	0.18	0.235	1.02e-07	EC_2	Tpm4
Wsb1	3.36e-12	-0.273654	0.144	0.198	1.12e-07	EC_2	Wsb1
Trp53i11.1	3.36e-12	-0.32833	0.15	0.202	1.12e-07	EC_2	Trp53i11
Arpc3.1	3.44e-12	-0.30053	0.136	0.187	1.15e-07	EC_2	Arpc3
Slc43a3	3.52e-12	0.256274	0.328	0.272	1.18e-07	EC_2	Slc43a3
Scai.1	3.68e-12	-0.345827	0.184	0.237	1.23e-07	EC_2	Scai
Dysf.1	3.94e-12	-0.268136	0.534	0.574	1.32e-07	EC_2	Dysf
Lrrc8d	4.57e-12	-0.302804	0.128	0.178	1.53e-07	EC_2	Lrrc8d
Hes1.1	4.9e-12	-0.327908	0.091	0.136	1.64e-07	EC_2	Hes1
Slc12a2.1	7.29e-12	-0.289648	0.082	0.125	2.44e-07	EC_2	Slc12a2
Enah.1	7.49e-12	-0.358183	0.103	0.148	2.5e-07	EC_2	Enah
Atp5g3.2	9.39e-12	-0.397943	0.111	0.157	3.14e-07	EC_2	Atp5g3
Zfp715	1.06e-11	-0.286867	0.099	0.144	3.56e-07	EC_2	Zfp715
Gatad2a	1.14e-11	-0.264358	0.165	0.218	3.82e-07	EC_2	Gatad2a
Atp5e.2	1.15e-11	-0.34665	0.074	0.115	3.85e-07	EC_2	Atp5e
Rasip1	1.33e-11	-0.299019	0.322	0.379	4.45e-07	EC_2	Rasip1
Ubc	1.35e-11	-0.310732	0.123	0.171	4.52e-07	EC_2	Ubc
Magi3.1	1.53e-11	-0.329457	0.213	0.267	5.12e-07	EC_2	Magi3
Aig1.1	2.07e-11	-0.366891	0.088	0.13	6.91e-07	EC_2	Aig1
Tspan13.1	2.29e-11	-0.283924	0.381	0.43	7.64e-07	EC_2	Tspan13
Schip1	2.59e-11	0.268814	0.329	0.272	8.66e-07	EC_2	Schip1
Rgl1.1	2.95e-11	-0.280005	0.297	0.354	9.86e-07	EC_2	Rgl1
Vamp5	3.48e-11	0.254974	0.177	0.134	1.16e-06	EC_2	Vamp5
Plk2	3.96e-11	-0.325308	0.146	0.195	1.32e-06	EC_2	Plk2
Neat1.1	4.01e-11	0.313813	0.176	0.133	1.34e-06	EC_2	Neat1
Ppp1r2.1	4.2e-11	-0.319147	0.351	0.401	1.4e-06	EC_2	Ppp1r2
Spata13	4.89e-11	-0.33735	0.217	0.268	1.63e-06	EC_2	Spata13
Rhoc.1	4.98e-11	-0.266874	0.068	0.106	1.67e-06	EC_2	Rhoc
Vim.1	5.57e-11	0.262978	0.172	0.131	1.86e-06	EC_2	Vim
Scaper	5.77e-11	0.260515	0.271	0.221	1.93e-06	EC_2	Scaper
Tmem204.1	1.66e-10	-0.287023	0.22	0.27	5.55e-06	EC_2	Tmem204
Slc25a4.2	1.7e-10	-0.333513	0.277	0.33	5.68e-06	EC_2	Slc25a4
Disp1.1	1.71e-10	-0.276827	0.07	0.107	5.72e-06	EC_2	Disp1
Uaca.1	1.74e-10	-0.308146	0.207	0.255	5.82e-06	EC_2	Uaca
Rpl23.1	1.9e-10	-0.275486	0.105	0.149	6.35e-06	EC_2	Rpl23
Pitpna	2.3e-10	-0.284659	0.226	0.276	7.68e-06	EC_2	Pitpna
Crip2	2.36e-10	-0.273524	0.084	0.123	7.88e-06	EC_2	Crip2
Fth1	2.38e-10	-0.308998	0.099	0.141	7.95e-06	EC_2	Fth1
Creb5.2	2.41e-10	-0.366558	0.146	0.192	8.06e-06	EC_2	Creb5
Runx1t1	2.49e-10	-0.250317	0.194	0.248	8.33e-06	EC_2	Runx1t1
Eif4a1	2.55e-10	-0.266555	0.07	0.107	8.52e-06	EC_2	Eif4a1
Fryl	2.93e-10	-0.29954	0.476	0.513	9.78e-06	EC_2	Fryl
Kif1b	2.94e-10	-0.267492	0.277	0.33	9.82e-06	EC_2	Kif1b
Ckm.2	3.79e-10	-0.383815	0.102	0.142	1.27e-05	EC_2	Ckm
Plscr2	4.28e-10	-0.256501	0.076	0.114	1.43e-05	EC_2	Plscr2
Rffl	4.66e-10	-0.284865	0.107	0.149	1.56e-05	EC_2	Rffl
Cox7c.2	5.53e-10	-0.342281	0.122	0.164	1.85e-05	EC_2	Cox7c
Dgke	5.76e-10	-0.276518	0.093	0.132	1.92e-05	EC_2	Dgke
Map1b.1	6.78e-10	-0.344044	0.133	0.176	2.27e-05	EC_2	Map1b
Ppp1cb	6.87e-10	-0.285189	0.261	0.311	2.3e-05	EC_2	Ppp1cb
Vcl	7.3e-10	0.296722	0.324	0.272	2.44e-05	EC_2	Vcl
Flt4.1	9.57e-10	-0.398935	0.093	0.13	3.2e-05	EC_2	Flt4
Stard9	1.03e-09	-0.279594	0.287	0.334	3.43e-05	EC_2	Stard9
Stab1.1	1.09e-09	-0.301095	0.109	0.15	3.66e-05	EC_2	Stab1
Cnst	1.38e-09	-0.284346	0.083	0.12	4.61e-05	EC_2	Cnst
Apold1	1.73e-09	-0.361445	0.193	0.238	5.78e-05	EC_2	Apold1
Rps8	1.9e-09	-0.26705	0.13	0.174	6.35e-05	EC_2	Rps8
Sbf2.1	2.08e-09	-0.253875	0.536	0.57	6.96e-05	EC_2	Sbf2
Actn4.1	2.16e-09	-0.263889	0.342	0.392	7.22e-05	EC_2	Actn4
Znrf1.1	2.61e-09	-0.265227	0.397	0.444	8.71e-05	EC_2	Znrf1
Rcsd1.1	2.69e-09	-0.27995	0.315	0.364	9.01e-05	EC_2	Rcsd1
F11r	3.12e-09	-0.264334	0.212	0.258	0.000104276	EC_2	F11r
Map2k1	3.7e-09	-0.263352	0.145	0.189	0.000123797	EC_2	Map2k1
Tshz3	3.98e-09	0.254295	0.231	0.189	0.000133024	EC_2	Tshz3
Tgfb1	4.52e-09	-0.286893	0.096	0.133	0.000151059	EC_2	Tgfb1
Cox6b1.2	6.22e-09	-0.288366	0.073	0.107	0.000207783	EC_2	Cox6b1
Tgfbr3.1	6.46e-09	-0.301642	0.115	0.154	0.000215802	EC_2	Tgfbr3
Atp5k.2	7.94e-09	-0.37166	0.106	0.143	0.000265402	EC_2	Atp5k
Robo4.1	1.11e-08	-0.255306	0.193	0.237	0.000370604	EC_2	Robo4
Cdk19.1	1.55e-08	-0.475116	0.172	0.212	0.000517332	EC_2	Cdk19
Tnnc1.2	1.66e-08	-0.413712	0.134	0.172	0.000553432	EC_2	Tnnc1
Wt1	1.82e-08	-0.297644	0.117	0.155	0.000606665	EC_2	Wt1
Atp5a1.2	2e-08	-0.331373	0.084	0.117	0.00066743	EC_2	Atp5a1
mt-Co2	2.38e-08	0.258255	0.268	0.222	0.00079397	EC_2	mt-Co2
Plekho2	3.7e-08	-0.250028	0.08	0.112	0.00123621	EC_2	Plekho2
Myl6	4.37e-08	-0.25987	0.208	0.252	0.001462	EC_2	Myl6
H2-D1.1	5.91e-08	-0.253026	0.299	0.341	0.00197681	EC_2	H2-D1
Deptor	5.99e-08	-0.287316	0.085	0.118	0.00200332	EC_2	Deptor
Exoc6	8.83e-08	-0.266135	0.347	0.387	0.00295265	EC_2	Exoc6
Cox6a2.2	1.08e-07	-0.317424	0.17	0.208	0.00360673	EC_2	Cox6a2
Zfp827.1	1.23e-07	-0.263807	0.118	0.152	0.00411132	EC_2	Zfp827
Usp6nl	1.86e-07	-0.252185	0.146	0.183	0.00622764	EC_2	Usp6nl
Rps29.1	3e-07	-0.269307	0.161	0.199	0.0100125	EC_2	Rps29
Atp5b.2	3.03e-07	-0.270703	0.136	0.172	0.010133	EC_2	Atp5b
Cadm1.1	6.04e-07	-0.270363	0.084	0.114	0.0201901	EC_2	Cadm1
Tmsb4x.2	6.97e-07	-0.495326	0.342	0.364	0.0233072	EC_2	Tmsb4x
mt-Cytb.1	7e-07	0.255185	0.208	0.172	0.0233963	EC_2	mt-Cytb
Atp5j2.2	7.77e-07	-0.259462	0.101	0.132	0.0259711	EC_2	Atp5j2
Man1a	8.11e-07	-0.274869	0.116	0.149	0.0271205	EC_2	Man1a
Uqcr11.2	9.73e-07	-0.274404	0.114	0.146	0.032524	EC_2	Uqcr11
Myadm.1	1.28e-06	-0.277738	0.164	0.197	0.0427274	EC_2	Myadm
Limch1.1	2.03e-06	-0.316597	0.348	0.377	0.0679708	EC_2	Limch1
Eogt.1	3.05e-06	-0.261387	0.082	0.109	0.101905	EC_2	Eogt
Frmd4b.1	3.07e-06	-0.259158	0.264	0.299	0.102464	EC_2	Frmd4b
Camk1d.2	4.19e-06	-0.253949	0.626	0.642	0.140152	EC_2	Camk1d
Fabp3.2	5.07e-06	-0.325559	0.109	0.138	0.169328	EC_2	Fabp3
Hbb-bs	5.6e-06	-0.652533	0.096	0.124	0.187264	EC_2	Hbb-bs
Sncaip.2	5.71e-06	-0.319879	0.356	0.385	0.190823	EC_2	Sncaip
Bbs9	6.31e-06	-0.295378	0.234	0.267	0.210859	EC_2	Bbs9
Tpm1.2	9.04e-06	-0.251775	0.21	0.245	0.302001	EC_2	Tpm1
Des.2	9.18e-06	-0.258942	0.084	0.11	0.30695	EC_2	Des
Fchsd2.2	7.38e-05	-0.271857	0.179	0.206	1	EC_2	Fchsd2
Pcdh17.1	0.000173121	-0.4215	0.264	0.285	1	EC_2	Pcdh17
Gm10800.2	0.000347504	-0.333727	0.102	0.123	1	EC_2	Gm10800
Cmss1.2	0.000484347	-0.269902	0.614	0.627	1	EC_2	Cmss1
Rnf213.1	0.000690642	-0.267764	0.268	0.291	1	EC_2	Rnf213
Actc1.2	0.000854828	-0.275438	0.204	0.227	1	EC_2	Actc1
Nebl	0	3.89017	0.574	0.009	0	EC_3	Nebl
Pcsk5.1	0	3.44445	0.658	0.037	0	EC_3	Pcsk5
Efna5	0	3.02211	0.335	0.021	0	EC_3	Efna5
Col8a1.3	0	2.74983	0.513	0.051	0	EC_3	Col8a1
Arl15.3	0	2.67404	0.967	0.639	0	EC_3	Arl15
Prdm16	0	2.64558	0.371	0.007	0	EC_3	Prdm16
Vegfc.3	0	2.60621	0.819	0.194	0	EC_3	Vegfc
Lama3.1	0	2.43958	0.569	0.054	0	EC_3	Lama3
Fbln5	0	2.42405	0.423	0.015	0	EC_3	Fbln5
Apba1.2	0	2.42364	0.652	0.139	0	EC_3	Apba1
Cdk19.2	0	2.33135	0.652	0.179	0	EC_3	Cdk19
Sorbs2.1	0	2.31222	0.406	0.039	0	EC_3	Sorbs2
Specc1	0	2.25878	0.351	0.017	0	EC_3	Specc1
Sulf1.3	0	2.22399	0.353	0.058	0	EC_3	Sulf1
Mannr	0	2.17975	0.388	0.011	0	EC_3	Mannr
Azin1.3	0	2.13353	0.413	0.092	0	EC_3	Azin1
Atp13a3.3	0	2.07078	0.475	0.11	0	EC_3	Atp13a3
St8sia6	0	2.04173	0.448	0.056	0	EC_3	St8sia6
Sema3g	0	2.02345	0.385	0.02	0	EC_3	Sema3g
Fn1	0	2.00238	0.308	0.029	0	EC_3	Fn1
Smad6.3	0	1.9727	0.49	0.105	0	EC_3	Smad6
Col5a2.3	0	1.95122	0.349	0.064	0	EC_3	Col5a2
Nos1ap	0	1.90725	0.315	0.054	0	EC_3	Nos1ap
Plcl1	0	1.84895	0.317	0.058	0	EC_3	Plcl1
Sh3kbp1	0	1.79909	0.357	0.042	0	EC_3	Sh3kbp1
Mast4.2	0	1.79685	0.859	0.503	0	EC_3	Mast4
Eogt.2	0	1.74454	0.431	0.086	0	EC_3	Eogt
Jag1.2	0	1.73862	0.379	0.071	0	EC_3	Jag1
Mecom.2	0	1.66643	0.975	0.772	0	EC_3	Mecom
Gja5	0	1.62052	0.242	0.002	0	EC_3	Gja5
Eps8l2	0	1.60266	0.26	0.005	0	EC_3	Eps8l2
Bmx	0	1.54806	0.298	0.04	0	EC_3	Bmx
Slc45a4	0	1.52661	0.188	0.014	0	EC_3	Slc45a4
Crispld1	0	1.52444	0.264	0.03	0	EC_3	Crispld1
Sox17.1	0	1.50699	0.39	0.079	0	EC_3	Sox17
Gm33206	0	1.48579	0.161	0.002	0	EC_3	Gm33206
Alpl	0	1.43281	0.283	0.039	0	EC_3	Alpl
Plcg2	0	1.41043	0.232	0.02	0	EC_3	Plcg2
Gm16070	0	1.23574	0.165	0.012	0	EC_3	Gm16070
Afap1l2	0	1.2324	0.18	0.008	0	EC_3	Afap1l2
Atp2a3	0	1.15363	0.17	0.007	0	EC_3	Atp2a3
Prom1	0	0.950871	0.129	0.005	0	EC_3	Prom1
Ttc39c	0	0.911604	0.132	0.007	0	EC_3	Ttc39c
Tshz2.1	0	-2.10907	0.302	0.783	0	EC_3	Tshz2
Tmtc2.1	0	-2.6519	0.156	0.698	0	EC_3	Tmtc2
Hdac9.1	0	-4.01517	0.047	0.654	0	EC_3	Hdac9
Eln.3	2.52e-306	2.2094	0.446	0.113	8.41e-302	EC_3	Eln
Amd1	3.22e-293	1.1772	0.167	0.016	1.08e-288	EC_3	Amd1
Stmn2.1	2.45e-292	1.45521	0.295	0.052	8.18e-288	EC_3	Stmn2
Col18a1	1.65e-283	1.08986	0.172	0.017	5.52e-279	EC_3	Col18a1
Eva1c	3.11e-276	1.23456	0.178	0.019	1.04e-271	EC_3	Eva1c
Ccdc85a.2	3.01e-272	-2.34808	0.168	0.662	1.01e-267	EC_3	Ccdc85a
Tgfb2	9.98e-271	1.60363	0.194	0.024	3.34e-266	EC_3	Tgfb2
Alox12	8.25e-265	1.18211	0.187	0.022	2.76e-260	EC_3	Alox12
Ace	3.6e-263	0.98338	0.152	0.014	1.2e-258	EC_3	Ace
Ldb2.2	3.29e-262	1.48646	0.885	0.625	1.1e-257	EC_3	Ldb2
1810006J02Rik	1.87e-260	1.08688	0.156	0.015	6.25e-256	EC_3	1810006J02Rik
Pdgfd.2	1.28e-257	1.33434	0.912	0.666	4.27e-253	EC_3	Pdgfd
Nav3.2	3.32e-256	-2.48419	0.139	0.614	1.11e-251	EC_3	Nav3
Nrp2.1	2.08e-253	-2.66815	0.092	0.569	6.95e-249	EC_3	Nrp2
Pld1.2	2.91e-251	1.4657	0.327	0.073	9.72e-247	EC_3	Pld1
Nuak1.3	9.97e-248	1.56201	0.331	0.075	3.33e-243	EC_3	Nuak1
Heg1.3	8.15e-247	1.24985	0.901	0.666	2.72e-242	EC_3	Heg1
Fryl.1	4.38e-246	1.31731	0.813	0.489	1.46e-241	EC_3	Fryl
Utrn.1	1.17e-237	1.1665	0.905	0.729	3.92e-233	EC_3	Utrn
Nhsl2.3	4.71e-230	1.59622	0.459	0.153	1.57e-225	EC_3	Nhsl2
Fbln2.3	5.58e-230	1.28444	0.327	0.077	1.87e-225	EC_3	Fbln2
Edn1	1.47e-225	1.06866	0.127	0.011	4.93e-221	EC_3	Edn1
Cyp7b1	1.98e-224	1.22553	0.144	0.015	6.61e-220	EC_3	Cyp7b1
Fchsd2.3	1e-222	1.63524	0.501	0.184	3.36e-218	EC_3	Fchsd2
Ptprj.1	1.43e-221	2.44013	0.225	0.041	4.77e-217	EC_3	Ptprj
Cyth3	9.05e-217	1.46739	0.461	0.157	3.02e-212	EC_3	Cyth3
Aqp1.1	3.41e-214	-2.86452	0.022	0.457	1.14e-209	EC_3	Aqp1
Msrb3.2	3e-213	1.43779	0.52	0.197	1e-208	EC_3	Msrb3
Tsc22d1.1	1.98e-206	1.48573	0.506	0.195	6.63e-202	EC_3	Tsc22d1
A430090L17Rik	6.14e-206	1.14133	0.178	0.026	2.05e-201	EC_3	A430090L17Rik
Chn2.2	3.82e-205	1.44094	0.497	0.185	1.28e-200	EC_3	Chn2
Klf12.3	5.33e-205	1.23655	0.823	0.521	1.78e-200	EC_3	Klf12
Tec	2.29e-202	1.07048	0.159	0.021	7.65e-198	EC_3	Tec
Lima1.3	6.02e-202	1.40783	0.589	0.264	2.01e-197	EC_3	Lima1
Ehd4	1.89e-196	1.50318	0.28	0.067	6.3e-192	EC_3	Ehd4
Pik3r3.1	3.64e-191	1.60474	0.462	0.171	1.22e-186	EC_3	Pik3r3
Epas1	5.09e-187	1.16096	0.773	0.475	1.7e-182	EC_3	Epas1
St6galnac3	2.5e-181	1.16352	0.866	0.647	8.36e-177	EC_3	St6galnac3
Mgp.1	3.6e-180	1.68199	0.242	0.054	1.2e-175	EC_3	Mgp
Rasal2.2	3.19e-179	-1.31737	0.461	0.766	1.07e-174	EC_3	Rasal2
Tox2	9.41e-177	1.09711	0.218	0.045	3.15e-172	EC_3	Tox2
Slc28a2.2	1.81e-174	-1.99516	0.082	0.466	6.07e-170	EC_3	Slc28a2
Sptbn1.1	3.85e-174	-0.919794	0.762	0.908	1.29e-169	EC_3	Sptbn1
Gcnt2.3	6.39e-172	1.28239	0.43	0.156	2.13e-167	EC_3	Gcnt2
Car8.1	6.89e-172	-2.02871	0.108	0.489	2.3e-167	EC_3	Car8
Bmp6	1.18e-169	-1.87747	0.107	0.501	3.94e-165	EC_3	Bmp6
Psd3.2	1.19e-169	-1.54622	0.286	0.645	3.97e-165	EC_3	Psd3
Ebf1.1	3.18e-165	0.910675	0.945	0.826	1.06e-160	EC_3	Ebf1
Itga6.3	5.05e-163	-1.60985	0.32	0.652	1.69e-158	EC_3	Itga6
Fry.1	1.94e-162	-1.48096	0.329	0.665	6.48e-158	EC_3	Fry
Hey1	3.86e-162	0.850999	0.131	0.018	1.29e-157	EC_3	Hey1
Shtn1.1	4.94e-162	0.987605	0.231	0.053	1.65e-157	EC_3	Shtn1
Stxbp6.2	2.71e-161	-2.37871	0.041	0.403	9.07e-157	EC_3	Stxbp6
Aspa	1.33e-159	0.881655	0.134	0.019	4.45e-155	EC_3	Aspa
Sept11.3	3.31e-159	1.32135	0.435	0.171	1.11e-154	EC_3	Sept11
Arhgef28.1	1.78e-156	1.11069	0.53	0.234	5.94e-152	EC_3	Arhgef28
St6galnac2	1.65e-154	0.81355	0.159	0.027	5.51e-150	EC_3	St6galnac2
Dock4.1	2.25e-154	-1.11782	0.508	0.788	7.52e-150	EC_3	Dock4
Rnf152	5.99e-152	1.2631	0.32	0.101	2e-147	EC_3	Rnf152
Sox13	4.68e-146	1.29109	0.455	0.195	1.57e-141	EC_3	Sox13
Xdh.2	1.38e-142	-1.61302	0.17	0.519	4.62e-138	EC_3	Xdh
Fli1.1	1.54e-140	-0.952793	0.677	0.856	5.15e-136	EC_3	Fli1
Fabp4.2	3.01e-139	-1.52409	0.463	0.716	1.01e-134	EC_3	Fabp4
Lrrc3b.2	1.55e-138	1.3004	0.357	0.126	5.18e-134	EC_3	Lrrc3b
2610307P16Rik.1	3.46e-136	-2.17188	0.059	0.387	1.16e-131	EC_3	2610307P16Rik
Hspg2.2	2.76e-134	-1.30021	0.289	0.605	9.23e-130	EC_3	Hspg2
Entpd1.3	3.96e-133	1.05612	0.494	0.218	1.32e-128	EC_3	Entpd1
Rasgrf2	6.4e-133	1.00706	0.74	0.493	2.14e-128	EC_3	Rasgrf2
Fgfr3.1	1.18e-132	0.857956	0.173	0.037	3.95e-128	EC_3	Fgfr3
Trpv4.1	3.68e-132	0.88141	0.186	0.042	1.23e-127	EC_3	Trpv4
Efnb2.1	3.92e-131	1.08485	0.541	0.267	1.31e-126	EC_3	Efnb2
Atp8b1.2	1.42e-130	1.12028	0.413	0.169	4.73e-126	EC_3	Atp8b1
Kank4	2.39e-130	0.779109	0.104	0.014	7.97e-126	EC_3	Kank4
Rgs3.3	1.87e-128	1.01952	0.581	0.306	6.25e-124	EC_3	Rgs3
Fmo1.1	2.32e-125	-1.74221	0.051	0.359	7.76e-121	EC_3	Fmo1
Tm6sf1	1.75e-124	0.980051	0.242	0.071	5.86e-120	EC_3	Tm6sf1
Tm4sf1.2	4.42e-121	1.04683	0.494	0.233	1.48e-116	EC_3	Tm4sf1
Rcsd1.2	2.29e-119	-1.68379	0.074	0.376	7.66e-115	EC_3	Rcsd1
Sipa1l2.1	6.82e-119	1.01949	0.347	0.132	2.28e-114	EC_3	Sipa1l2
Timp3.2	1.45e-116	1.37785	0.68	0.45	4.83e-112	EC_3	Timp3
Adgrl2.2	5.07e-115	-1.25133	0.384	0.645	1.69e-110	EC_3	Adgrl2
Ptprk	5.25e-114	-1.44298	0.232	0.526	1.75e-109	EC_3	Ptprk
Itprid2	1.59e-113	1.09334	0.227	0.067	5.31e-109	EC_3	Itprid2
Arhgap18.2	4.58e-111	-1.33532	0.287	0.573	1.53e-106	EC_3	Arhgap18
Emcn.1	2.01e-110	-1.12525	0.334	0.631	6.72e-106	EC_3	Emcn
Actn4.2	3.8e-109	1.07902	0.61	0.372	1.27e-104	EC_3	Actn4
Zfp521.3	4.77e-108	-1.86945	0.087	0.367	1.59e-103	EC_3	Zfp521
Calcrl.3	1.01e-107	-1.6515	0.168	0.457	3.39e-103	EC_3	Calcrl
Tbc1d1.1	8.59e-105	1.06276	0.382	0.167	2.87e-100	EC_3	Tbc1d1
Synpo.1	1.94e-102	0.962803	0.176	0.046	6.47e-98	EC_3	Synpo
Pitpnm3	2.22e-102	0.661899	0.107	0.019	7.42e-98	EC_3	Pitpnm3
Malat1.1	2.82e-102	0.53776	0.985	0.948	9.41e-98	EC_3	Malat1
Cd36.1	3.52e-102	-0.964472	0.515	0.75	1.18e-97	EC_3	Cd36
Rhpn2	1.04e-100	0.781296	0.175	0.046	3.48e-96	EC_3	Rhpn2
Kcnb1.1	1.67e-100	-1.74076	0.011	0.261	5.58e-96	EC_3	Kcnb1
Tcf4.2	4.32e-100	-0.695327	0.868	0.927	1.44e-95	EC_3	Tcf4
Bicd1	5.73e-100	0.848636	0.131	0.028	1.92e-95	EC_3	Bicd1
Itpr2.1	8.5e-98	-1.2197	0.202	0.478	2.84e-93	EC_3	Itpr2
Limch1.2	9.04e-97	0.904433	0.611	0.359	3.02e-92	EC_3	Limch1
Adamts9.3	2.65e-95	-1.23684	0.334	0.591	8.87e-91	EC_3	Adamts9
Vav3.2	3.44e-95	-1.15836	0.3	0.564	1.15e-90	EC_3	Vav3
Hmcn1.2	3.64e-95	-2.0579	0.103	0.371	1.22e-90	EC_3	Hmcn1
Fam135a.1	9.62e-95	1.57207	0.327	0.144	3.21e-90	EC_3	Fam135a
Osmr.1	1.05e-92	0.911696	0.421	0.202	3.5e-88	EC_3	Osmr
Ncald.1	4.41e-92	-1.77647	0.058	0.308	1.48e-87	EC_3	Ncald
Map4k3.2	7.49e-92	0.778789	0.763	0.566	2.5e-87	EC_3	Map4k3
Pdcd4.1	4.45e-90	0.963461	0.242	0.086	1.49e-85	EC_3	Pdcd4
Prex2	1.11e-89	0.675877	0.874	0.754	3.72e-85	EC_3	Prex2
Pard3b.2	2.98e-89	-1.12108	0.386	0.623	9.96e-85	EC_3	Pard3b
Smad7.1	6.66e-89	1.04268	0.416	0.211	2.22e-84	EC_3	Smad7
Qk.1	7.52e-89	-0.985529	0.393	0.635	2.51e-84	EC_3	Qk
Lama4.2	2.29e-88	-1.1793	0.327	0.565	7.66e-84	EC_3	Lama4
Bcar3.1	1.09e-86	0.95952	0.241	0.087	3.63e-82	EC_3	Bcar3
Etl4.2	1.46e-86	-0.717822	0.74	0.849	4.87e-82	EC_3	Etl4
Kdr.2	3.12e-86	-1.09321	0.275	0.531	1.04e-81	EC_3	Kdr
Sema6a	4.29e-86	-0.862161	0.574	0.753	1.43e-81	EC_3	Sema6a
Nrp1.2	4.3e-86	-0.88614	0.597	0.756	1.44e-81	EC_3	Nrp1
Col4a2.3	3.11e-85	-1.12597	0.322	0.563	1.04e-80	EC_3	Col4a2
Prkch	9.52e-85	-0.777093	0.589	0.776	3.18e-80	EC_3	Prkch
Plxna4.2	1.21e-84	0.836507	0.597	0.367	4.03e-80	EC_3	Plxna4
Fbn1.3	5.99e-84	0.869495	0.522	0.303	2e-79	EC_3	Fbn1
Col4a1.2	7.72e-84	-1.1217	0.361	0.585	2.58e-79	EC_3	Col4a1
Plcb4.1	3.42e-82	-0.688102	0.802	0.878	1.14e-77	EC_3	Plcb4
Cdc42bpa.1	6.93e-82	0.837133	0.66	0.468	2.32e-77	EC_3	Cdc42bpa
Arhgef3.1	1.29e-81	-0.938771	0.373	0.613	4.32e-77	EC_3	Arhgef3
Itpr3	7.31e-81	0.689771	0.17	0.051	2.44e-76	EC_3	Itpr3
Unc13b.3	3.09e-80	0.782332	0.614	0.394	1.03e-75	EC_3	Unc13b
Pkp4.1	4.3e-80	-1.08409	0.365	0.589	1.44e-75	EC_3	Pkp4
Swap70	2.74e-79	0.904315	0.417	0.218	9.15e-75	EC_3	Swap70
Fmnl2	4.5e-79	-1.27228	0.163	0.41	1.5e-74	EC_3	Fmnl2
Cttnbp2	1.15e-78	0.843914	0.189	0.062	3.85e-74	EC_3	Cttnbp2
Sorbs1.1	3.39e-78	-1.02458	0.269	0.517	1.13e-73	EC_3	Sorbs1
Syn3.1	1.45e-77	1.1959	0.306	0.137	4.83e-73	EC_3	Syn3
Mertk.1	2.18e-77	0.958917	0.39	0.197	7.29e-73	EC_3	Mertk
Tln2.3	2.19e-77	0.802908	0.289	0.121	7.31e-73	EC_3	Tln2
Cd2ap.1	2.91e-76	0.890559	0.514	0.312	9.72e-72	EC_3	Cd2ap
Lrmda.1	6.56e-76	-0.959701	0.358	0.603	2.19e-71	EC_3	Lrmda
Snx18	1.31e-75	0.787804	0.115	0.028	4.38e-71	EC_3	Snx18
Mtss1	3.92e-75	-1.07334	0.247	0.481	1.31e-70	EC_3	Mtss1
Gpihbp1.2	5.49e-75	-1.23774	0.11	0.343	1.83e-70	EC_3	Gpihbp1
Slc6a6.1	6.12e-74	0.919333	0.601	0.392	2.04e-69	EC_3	Slc6a6
Clu	8.38e-74	0.669978	0.105	0.024	2.8e-69	EC_3	Clu
Ssh2	2.32e-73	-1.00093	0.321	0.549	7.74e-69	EC_3	Ssh2
Clmn	2.85e-73	0.740427	0.167	0.052	9.52e-69	EC_3	Clmn
Eml1.1	2.06e-72	0.865799	0.366	0.181	6.9e-68	EC_3	Eml1
Abr	3.67e-72	0.830048	0.237	0.093	1.23e-67	EC_3	Abr
Mgat4a.1	5.06e-72	-1.17415	0.142	0.368	1.69e-67	EC_3	Mgat4a
Tanc2.1	8.6e-72	1.1219	0.508	0.326	2.88e-67	EC_3	Tanc2
Ptprm.2	2.02e-71	0.434756	0.98	0.94	6.76e-67	EC_3	Ptprm
Gulp1	9.99e-71	0.820541	0.565	0.357	3.34e-66	EC_3	Gulp1
Trp53i11.2	2.96e-70	-1.38235	0.017	0.207	9.9e-66	EC_3	Trp53i11
Adgrl4.2	5.42e-69	-0.793038	0.659	0.783	1.81e-64	EC_3	Adgrl4
Sh2d3c	1.52e-68	-1.11124	0.123	0.344	5.08e-64	EC_3	Sh2d3c
Rgcc.2	2.81e-68	-1.24064	0.141	0.364	9.4e-64	EC_3	Rgcc
[truncated: 4,269 more rows]
